# Supplementary material for: A low-abundance class of Dicer-dependent siRNAs produced from a variety of features in C. elegans
Source: HighWire-hosted journal article supplement (doi:10.1101/gr.279083.124), 2024-12-01
Supplement: Supplemental_Table_S1.xlsx [file Supplemental_Table_S1.xlsx]

## Sheet: Table S1
Supplemental Table S1. 23H-RNA candidates (positional data for WS235-WS290+ releases).
Chromosome	Start	End	RDE-1-co-IP Counts	Strand	Attributes	Evidence For Duplex*
I	14834	14856	13	-	ID=AGCGAAAACTACAGTAATTCTTT;Hits=342;Alias=CELE1;Class=23H-RNA	TRUE
I	14835	14856	7	-	ID=AGCGAAAACTACAGTAATTCTT;Hits=384;Alias=CELE1;Class=23H-RNA	TRUE
I	14835	14857	35	-	ID=TAGCGAAAACTACAGTAATTCTT;Hits=331;Alias=CELE1;Class=23H-RNA	TRUE
I	15641	15663	18	-	ID=CGTAGGATGTCGGCGGCCTGATA;Hits=52;Alias=PALTA3;Class=23H-RNA	TRUE
I	15643	15665	11	+	ID=TCAGGCCGCCGACATCCTACGGG;Hits=44;Alias=PALTA3;Class=23H-RNA	TRUE
I	15664	15686	82	-	ID=TAAACATAGCGGCGCGCGGAACC;Hits=84;Alias=PALTA3;Class=23H-RNA	TRUE
I	15665	15686	24	-	ID=TAAACATAGCGGCGCGCGGAAC;Hits=97;Alias=PALTA3;Class=23H-RNA	TRUE
I	15665	15687	487	-	ID=TTAAACATAGCGGCGCGCGGAAC;Hits=95;Alias=PALTA3;Class=23H-RNA	TRUE
I	15666	15686	6	+	ID=TTCCGCGCGCCGCTATGTTTA;Hits=98;Alias=PALTA3;Class=23H-RNA	TRUE
I	15666	15687	32	-	ID=TTAAACATAGCGGCGCGCGGAA;Hits=96;Alias=PALTA3;Class=23H-RNA	TRUE
I	15666	15688	99	+	ID=TTCCGCGCGCCGCTATGTTTAAC;Hits=95;Alias=PALTA3;Class=23H-RNA	TRUE
I	15666	15689	63	+	ID=TTCCGCGCGCCGCTATGTTTAACT;Hits=95;Alias=PALTA3;Class=23H-RNA	TRUE
I	15667	15687	24	-	ID=TTAAACATAGCGGCGCGCGGA;Hits=101;Alias=PALTA3;Class=23H-RNA	TRUE
I	15667	15688	50	+	ID=TCCGCGCGCCGCTATGTTTAAC;Hits=100;Alias=PALTA3;Class=23H-RNA	TRUE
I	15667	15689	1001	+	ID=TCCGCGCGCCGCTATGTTTAACT;Hits=100;Alias=PALTA3;Class=23H-RNA	TRUE
I	15668	15689	291	+	ID=CCGCGCGCCGCTATGTTTAACT;Hits=101;Alias=PALTA3;Class=23H-RNA	TRUE
I	15668	15690	63	+	ID=CCGCGCGCCGCTATGTTTAACTC;Hits=99;Alias=PALTA3;Class=23H-RNA	TRUE
I	15669	15689	84	+	ID=CGCGCGCCGCTATGTTTAACT;Hits=102;Alias=PALTA3;Class=23H-RNA	TRUE
I	15669	15690	150	+	ID=CGCGCGCCGCTATGTTTAACTC;Hits=100;Alias=PALTA3;Class=23H-RNA	TRUE
I	15669	15691	133	+	ID=CGCGCGCCGCTATGTTTAACTCG;Hits=96;Alias=PALTA3;Class=23H-RNA	FALSE
I	15671	15692	41	+	ID=CGCGCCGCTATGTTTAACTCGC;Hits=85;Alias=PALTA3;Class=23H-RNA	TRUE
I	15722	15744	16	-	ID=CGCGCCGCTATGTTTAACTCGCA;Hits=65;Alias=PALTA3;Class=23H-RNA	TRUE
I	15723	15744	41	-	ID=CGCGCCGCTATGTTTAACTCGC;Hits=85;Alias=PALTA3;Class=23H-RNA	TRUE
I	15724	15746	133	-	ID=CGCGCGCCGCTATGTTTAACTCG;Hits=96;Alias=PALTA3;Class=23H-RNA	FALSE
I	15725	15746	150	-	ID=CGCGCGCCGCTATGTTTAACTC;Hits=100;Alias=PALTA3;Class=23H-RNA	TRUE
I	15725	15747	63	-	ID=CCGCGCGCCGCTATGTTTAACTC;Hits=99;Alias=PALTA3;Class=23H-RNA	TRUE
I	15726	15746	84	-	ID=CGCGCGCCGCTATGTTTAACT;Hits=102;Alias=PALTA3;Class=23H-RNA	TRUE
I	15726	15747	291	-	ID=CCGCGCGCCGCTATGTTTAACT;Hits=101;Alias=PALTA3;Class=23H-RNA	TRUE
I	15726	15748	1001	-	ID=TCCGCGCGCCGCTATGTTTAACT;Hits=100;Alias=PALTA3;Class=23H-RNA	TRUE
I	15726	15749	63	-	ID=TTCCGCGCGCCGCTATGTTTAACT;Hits=95;Alias=PALTA3;Class=23H-RNA	TRUE
I	15727	15748	50	-	ID=TCCGCGCGCCGCTATGTTTAAC;Hits=100;Alias=PALTA3;Class=23H-RNA	TRUE
I	15727	15749	99	-	ID=TTCCGCGCGCCGCTATGTTTAAC;Hits=95;Alias=PALTA3;Class=23H-RNA	TRUE
I	15728	15748	24	+	ID=TTAAACATAGCGGCGCGCGGA;Hits=101;Alias=PALTA3;Class=23H-RNA	TRUE
I	15728	15749	32	+	ID=TTAAACATAGCGGCGCGCGGAA;Hits=96;Alias=PALTA3;Class=23H-RNA	TRUE
I	15728	15750	487	+	ID=TTAAACATAGCGGCGCGCGGAAC;Hits=95;Alias=PALTA3;Class=23H-RNA	TRUE
I	15729	15749	6	-	ID=TTCCGCGCGCCGCTATGTTTA;Hits=98;Alias=PALTA3;Class=23H-RNA	TRUE
I	15729	15750	24	+	ID=TAAACATAGCGGCGCGCGGAAC;Hits=97;Alias=PALTA3;Class=23H-RNA	TRUE
I	15729	15751	82	+	ID=TAAACATAGCGGCGCGCGGAACC;Hits=84;Alias=PALTA3;Class=23H-RNA	TRUE
I	15839	15860	26	+	ID=TGAGGTTTTCTGCAGTACACGC;Hits=69;Alias=PALTA3;Class=23H-RNA	TRUE
I	15841	15862	54	-	ID=TGGCGTGTACTGCAGAAAACCT;Hits=162;Alias=PALTA3;Class=23H-RNA	TRUE
I	15843	15866	127	-	ID=TGCGTGGCGTGTACTGCAGAAAAC;Hits=157;Alias=PALTA3;Class=23H-RNA	FALSE
I	15844	15865	6	+	ID=TTTTCTGCAGTACACGCCACGC;Hits=162;Alias=PALTA3;Class=23H-RNA	TRUE
I	15845	15865	16	+	ID=TTTCTGCAGTACACGCCACGC;Hits=166;Alias=PALTA3;Class=23H-RNA	TRUE
I	30840	30862	54	-	ID=ATCGACACAAGCGCTACAGTAGT;Hits=211;Alias=CELE1;Class=23H-RNA	TRUE
I	30841	30862	12	-	ID=ATCGACACAAGCGCTACAGTAG;Hits=228;Alias=CELE1;Class=23H-RNA	TRUE
I	30842	30863	15	+	ID=TACTGTAGCGCTTGTGTCGATT;Hits=262;Alias=CELE1;Class=23H-RNA	TRUE
I	30842	30864	14	+	ID=TACTGTAGCGCTTGTGTCGATTT;Hits=253;Alias=CELE1;Class=23H-RNA	TRUE
I	46410	46432	55	-	ID=CGTATATTCTCTATTAGTGCTGC;Hits=65;Alias=TC2_Mariner;Class=23H-RNA	TRUE
I	46412	46434	18	+	ID=AGCACTAATAGAGAATATACGGT;Hits=68;Alias=TC2_Mariner;Class=23H-RNA	TRUE
I	46580	46602	9	-	ID=CGCATTTTTCGTAGATCAAACCG;Hits=57;Alias=CELE14B;Class=23H-RNA	TRUE
I	46583	46605	67	-	ID=TCCCGCATTTTTCGTAGATCAAA;Hits=98;Alias=CELE14B;Class=23H-RNA	TRUE
I	46583	46605	9	+	ID=TTTGATCTACGAAAAATGCGGGA;Hits=98;Alias=CELE14B;Class=23H-RNA	TRUE
I	51454	51475	13	+	ID=TCACGAGGGACGAGGAAAAGTG;Hits=316;Alias=PAL5A;Class=23H-RNA	TRUE
I	51759	51781	11	+	ID=TACCTGATTTTCATAACGAGACC;Hits=346;Alias=PAL5A;Class=23H-RNA	TRUE
I	51762	51784	36	-	ID=AGCGGTCTCGTTATGAAAATCAG;Hits=351;Alias=PAL5A;Class=23H-RNA	TRUE
I	51764	51786	22	-	ID=TCAGCGGTCTCGTTATGAAAATC;Hits=354;Alias=PAL5A;Class=23H-RNA	TRUE
I	51769	51790	14	-	ID=TTTTTCAGCGGTCTCGTTATGA;Hits=366;Alias=PAL5A;Class=23H-RNA	TRUE
I	51769	51791	63	-	ID=CTTTTTCAGCGGTCTCGTTATGA;Hits=354;Alias=PAL5A;Class=23H-RNA	TRUE
I	51770	51790	13	-	ID=TTTTTCAGCGGTCTCGTTATG;Hits=368;Alias=PAL5A;Class=23H-RNA	TRUE
I	51770	51791	62	-	ID=CTTTTTCAGCGGTCTCGTTATG;Hits=356;Alias=PAL5A;Class=23H-RNA	TRUE
I	51770	51792	40	-	ID=ACTTTTTCAGCGGTCTCGTTATG;Hits=355;Alias=PAL5A;Class=23H-RNA	TRUE
I	51770	51792	11	+	ID=CATAACGAGACCGCTGAAAAAGT;Hits=355;Alias=PAL5A;Class=23H-RNA	TRUE
I	51771	51792	18	+	ID=ATAACGAGACCGCTGAAAAAGT;Hits=371;Alias=PAL5A;Class=23H-RNA	TRUE
I	51771	51793	73	+	ID=ATAACGAGACCGCTGAAAAAGTT;Hits=369;Alias=PAL5A;Class=23H-RNA	TRUE
I	51772	51793	87	+	ID=TAACGAGACCGCTGAAAAAGTT;Hits=369;Alias=PAL5A;Class=23H-RNA	TRUE
I	51772	51794	46	+	ID=TAACGAGACCGCTGAAAAAGTTT;Hits=364;Alias=PAL5A;Class=23H-RNA	TRUE
I	51773	51794	24	+	ID=AACGAGACCGCTGAAAAAGTTT;Hits=371;Alias=PAL5A;Class=23H-RNA	TRUE
I	52191	52212	13	-	ID=TCACGAGGGACGAGGAAAAGTG;Hits=316;Alias=PAL5A;Class=23H-RNA	TRUE
I	54809	54829	20	-	ID=TATCTACACTCTCTGTACCGG;Hits=70;Alias=Unknown_RE1;Class=23H-RNA	TRUE
I	54809	54830	220	-	ID=CTATCTACACTCTCTGTACCGG;Hits=69;Alias=Unknown_RE1;Class=23H-RNA	TRUE
I	54809	54831	24	-	ID=ACTATCTACACTCTCTGTACCGG;Hits=68;Alias=Unknown_RE1;Class=23H-RNA	TRUE
I	54982	55003	13	+	ID=CTATCTACACTCTCTGTACCGA;Hits=2;Alias=other;Class=23H-RNA	TRUE
I	70552	70573	7	+	ID=AGCGAAAACTACAGTAATTCTT;Hits=384;Alias=CELE1;Class=23H-RNA	TRUE
I	83711	83733	35	+	ID=TAGCGAAAACTACAGTAATTCTT;Hits=331;Alias=CELE1;Class=23H-RNA	TRUE
I	83712	83733	7	+	ID=AGCGAAAACTACAGTAATTCTT;Hits=384;Alias=CELE1;Class=23H-RNA	TRUE
I	83712	83734	13	+	ID=AGCGAAAACTACAGTAATTCTTT;Hits=342;Alias=CELE1;Class=23H-RNA	TRUE
I	83857	83879	14	-	ID=TACTGTAGCGCTTGTGTCGATTT;Hits=253;Alias=CELE1;Class=23H-RNA	TRUE
I	83858	83879	15	-	ID=TACTGTAGCGCTTGTGTCGATT;Hits=262;Alias=CELE1;Class=23H-RNA	TRUE
I	83859	83880	12	+	ID=ATCGACACAAGCGCTACAGTAG;Hits=228;Alias=CELE1;Class=23H-RNA	TRUE
I	83859	83881	54	+	ID=ATCGACACAAGCGCTACAGTAGT;Hits=211;Alias=CELE1;Class=23H-RNA	TRUE
I	115148	115170	35	+	ID=TAGCGAAAACTACAGTAATTCTT;Hits=331;Alias=CELE1;Class=23H-RNA	TRUE
I	115149	115170	7	+	ID=AGCGAAAACTACAGTAATTCTT;Hits=384;Alias=CELE1;Class=23H-RNA	TRUE
I	115149	115171	13	+	ID=AGCGAAAACTACAGTAATTCTTT;Hits=342;Alias=CELE1;Class=23H-RNA	TRUE
I	115323	115345	13	-	ID=AGCGAAAACTACAGTAATTCTTT;Hits=342;Alias=CELE1;Class=23H-RNA	TRUE
I	127046	127068	14	-	ID=TACTGTAGCGCTTGTGTCGATTT;Hits=253;Alias=CELE1;Class=23H-RNA	TRUE
I	127047	127068	15	-	ID=TACTGTAGCGCTTGTGTCGATT;Hits=262;Alias=CELE1;Class=23H-RNA	TRUE
I	127048	127069	12	+	ID=ATCGACACAAGCGCTACAGTAG;Hits=228;Alias=CELE1;Class=23H-RNA	TRUE
I	127048	127070	54	+	ID=ATCGACACAAGCGCTACAGTAGT;Hits=211;Alias=CELE1;Class=23H-RNA	TRUE
I	131964	131986	13	-	ID=AGCGAAAACTACAGTAATTCTTT;Hits=342;Alias=CELE1;Class=23H-RNA	TRUE
I	131965	131986	7	-	ID=AGCGAAAACTACAGTAATTCTT;Hits=384;Alias=CELE1;Class=23H-RNA	TRUE
I	188184	188204	10	+	ID=TAGGGGAAAAGATGTTGAATG;Hits=14;Alias=other;Class=23H-RNA	TRUE
I	188222	188244	23	+	ID=TCGACACATTGATCATGCTGATA;Hits=14;Alias=other;Class=23H-RNA	TRUE
I	192493	192514	7	-	ID=AGCGAAAACTACAGTAATTCTT;Hits=384;Alias=CELE1;Class=23H-RNA	TRUE
I	192493	192515	35	-	ID=TAGCGAAAACTACAGTAATTCTT;Hits=331;Alias=CELE1;Class=23H-RNA	TRUE
I	214101	214122	55	-	ID=TGTGCTGAGCTCTTGGATGATC;Hits=1;Alias=puf-10,Y48G1BL.3;Class=23H-RNA	TRUE
I	259771	259793	35	+	ID=TAGCGAAAACTACAGTAATTCTT;Hits=331;Alias=CELE1;Class=23H-RNA	TRUE
I	259772	259793	7	+	ID=AGCGAAAACTACAGTAATTCTT;Hits=384;Alias=CELE1;Class=23H-RNA	TRUE
I	259772	259794	13	+	ID=AGCGAAAACTACAGTAATTCTTT;Hits=342;Alias=CELE1;Class=23H-RNA	TRUE
I	259923	259945	14	-	ID=TACTGTAGCGCTTGTGTCGATTT;Hits=253;Alias=CELE1;Class=23H-RNA	TRUE
I	259924	259945	15	-	ID=TACTGTAGCGCTTGTGTCGATT;Hits=262;Alias=CELE1;Class=23H-RNA	TRUE
I	259925	259946	12	+	ID=ATCGACACAAGCGCTACAGTAG;Hits=228;Alias=CELE1;Class=23H-RNA	TRUE
I	259925	259947	54	+	ID=ATCGACACAAGCGCTACAGTAGT;Hits=211;Alias=CELE1;Class=23H-RNA	TRUE
I	290179	290200	7	-	ID=AGCGAAAACTACAGTAATTCTT;Hits=384;Alias=CELE1;Class=23H-RNA	TRUE
I	290179	290201	35	-	ID=TAGCGAAAACTACAGTAATTCTT;Hits=331;Alias=CELE1;Class=23H-RNA	TRUE
I	294663	294685	9	-	ID=ATCGACACAAGCGCTACAGTAGC;Hits=15;Alias=CELE1;Class=23H-RNA	TRUE
I	294664	294685	12	-	ID=ATCGACACAAGCGCTACAGTAG;Hits=228;Alias=CELE1;Class=23H-RNA	TRUE
I	294665	294686	15	+	ID=TACTGTAGCGCTTGTGTCGATT;Hits=262;Alias=CELE1;Class=23H-RNA	TRUE
I	294665	294687	14	+	ID=TACTGTAGCGCTTGTGTCGATTT;Hits=253;Alias=CELE1;Class=23H-RNA	TRUE
I	294781	294803	14	-	ID=TACTGTAGCGCTTGTGTCGATTT;Hits=253;Alias=CELE1;Class=23H-RNA	TRUE
I	294782	294803	15	-	ID=TACTGTAGCGCTTGTGTCGATT;Hits=262;Alias=CELE1;Class=23H-RNA	TRUE
I	294783	294804	12	+	ID=ATCGACACAAGCGCTACAGTAG;Hits=228;Alias=CELE1;Class=23H-RNA	TRUE
I	294783	294805	54	+	ID=ATCGACACAAGCGCTACAGTAGT;Hits=211;Alias=CELE1;Class=23H-RNA	TRUE
I	315755	315776	5	+	ID=TCGGGGGATGTCCAATTGGGGG;Hits=69;Alias=DNA-8-1;Class=23H-RNA	TRUE
I	315791	315812	8	-	ID=TTCTGTGGGCGGGGCCAATCCC;Hits=82;Alias=DNA-8-1;Class=23H-RNA	TRUE
I	315792	315813	21	-	ID=GTTCTGTGGGCGGGGCCAATCC;Hits=89;Alias=DNA-8-1;Class=23H-RNA	TRUE
I	315807	315829	5	-	ID=CGTATTGCAAGCCACGGTTCTGT;Hits=88;Alias=DNA-8-1;Class=23H-RNA	TRUE
I	315824	315845	12	+	ID=AATACGCCCATTTCTGCAACTG;Hits=93;Alias=DNA-8-1;Class=23H-RNA	TRUE
I	315834	315856	12	-	ID=AAACCGTGCGGCAGTTGCAGAAA;Hits=89;Alias=DNA-8-1;Class=23H-RNA	TRUE
I	315836	315857	12	+	ID=TCTGCAACTGCCGCACGGTTTT;Hits=81;Alias=DNA-8-1;Class=23H-RNA	TRUE
I	315839	315861	20	-	ID=TTTTAAAACCGTGCGGCAGTTGC;Hits=76;Alias=DNA-8-1;Class=23H-RNA	TRUE
I	315876	315896	12	+	ID=ATAGAGCGAGAATTAACAAGA;Hits=34;Alias=DNA-8-1;Class=23H-RNA	TRUE
I	315876	315897	8	+	ID=ATAGAGCGAGAATTAACAAGAA;Hits=34;Alias=DNA-8-1;Class=23H-RNA	TRUE
I	315909	315930	12	-	ID=TCTGCAACTGCCGCACGGTTTT;Hits=81;Alias=DNA-8-1;Class=23H-RNA	TRUE
I	315910	315932	12	+	ID=AAACCGTGCGGCAGTTGCAGAAA;Hits=89;Alias=DNA-8-1;Class=23H-RNA	TRUE
I	315921	315942	12	-	ID=AATACGCCCATTTCTGCAACTG;Hits=93;Alias=DNA-8-1;Class=23H-RNA	TRUE
I	315937	315959	5	+	ID=CGTATTGCAAGCCACGGTTCTGT;Hits=88;Alias=DNA-8-1;Class=23H-RNA	TRUE
I	315990	316011	5	-	ID=TCGGGGGATGTCCAATTGGGGG;Hits=69;Alias=DNA-8-1;Class=23H-RNA	TRUE
I	318468	318490	13	-	ID=AGCGAAAACTACAGTAATTCTTT;Hits=342;Alias=CELE1;Class=23H-RNA	TRUE
I	318469	318490	7	-	ID=AGCGAAAACTACAGTAATTCTT;Hits=384;Alias=CELE1;Class=23H-RNA	TRUE
I	318469	318491	35	-	ID=TAGCGAAAACTACAGTAATTCTT;Hits=331;Alias=CELE1;Class=23H-RNA	TRUE
I	338649	338669	10	+	ID=GAAGACACTTTCCAATTACCC;Hits=75;Alias=GAAGACACTTTCCAATTACCC_Repeat;Class=23H-RNA	TRUE
I	338833	338853	10	+	ID=GAAGACACTTTCCAATTACCC;Hits=75;Alias=GAAGACACTTTCCAATTACCC_Repeat;Class=23H-RNA	TRUE
I	339017	339037	10	+	ID=GAAGACACTTTCCAATTACCC;Hits=75;Alias=GAAGACACTTTCCAATTACCC_Repeat;Class=23H-RNA	TRUE
I	339201	339221	10	+	ID=GAAGACACTTTCCAATTACCC;Hits=75;Alias=GAAGACACTTTCCAATTACCC_Repeat;Class=23H-RNA	TRUE
I	339385	339405	10	+	ID=GAAGACACTTTCCAATTACCC;Hits=75;Alias=GAAGACACTTTCCAATTACCC_Repeat;Class=23H-RNA	TRUE
I	339569	339589	10	+	ID=GAAGACACTTTCCAATTACCC;Hits=75;Alias=GAAGACACTTTCCAATTACCC_Repeat;Class=23H-RNA	TRUE
I	339753	339773	10	+	ID=GAAGACACTTTCCAATTACCC;Hits=75;Alias=GAAGACACTTTCCAATTACCC_Repeat;Class=23H-RNA	TRUE
I	339937	339957	10	+	ID=GAAGACACTTTCCAATTACCC;Hits=75;Alias=GAAGACACTTTCCAATTACCC_Repeat;Class=23H-RNA	TRUE
I	340121	340141	10	+	ID=GAAGACACTTTCCAATTACCC;Hits=75;Alias=GAAGACACTTTCCAATTACCC_Repeat;Class=23H-RNA	TRUE
I	340305	340325	10	+	ID=GAAGACACTTTCCAATTACCC;Hits=75;Alias=GAAGACACTTTCCAATTACCC_Repeat;Class=23H-RNA	TRUE
I	340489	340509	10	+	ID=GAAGACACTTTCCAATTACCC;Hits=75;Alias=GAAGACACTTTCCAATTACCC_Repeat;Class=23H-RNA	TRUE
I	340673	340693	10	+	ID=GAAGACACTTTCCAATTACCC;Hits=75;Alias=GAAGACACTTTCCAATTACCC_Repeat;Class=23H-RNA	TRUE
I	340857	340877	10	+	ID=GAAGACACTTTCCAATTACCC;Hits=75;Alias=GAAGACACTTTCCAATTACCC_Repeat;Class=23H-RNA	TRUE
I	341041	341061	10	+	ID=GAAGACACTTTCCAATTACCC;Hits=75;Alias=GAAGACACTTTCCAATTACCC_Repeat;Class=23H-RNA	TRUE
I	344567	344589	54	-	ID=ATCGACACAAGCGCTACAGTAGT;Hits=211;Alias=CELE1;Class=23H-RNA	TRUE
I	344568	344589	12	-	ID=ATCGACACAAGCGCTACAGTAG;Hits=228;Alias=CELE1;Class=23H-RNA	TRUE
I	344569	344590	15	+	ID=TACTGTAGCGCTTGTGTCGATT;Hits=262;Alias=CELE1;Class=23H-RNA	TRUE
I	344569	344591	14	+	ID=TACTGTAGCGCTTGTGTCGATTT;Hits=253;Alias=CELE1;Class=23H-RNA	TRUE
I	352458	352480	13	-	ID=AGCGAAAACTACAGTAATTCTTT;Hits=342;Alias=CELE1;Class=23H-RNA	TRUE
I	352459	352480	7	-	ID=AGCGAAAACTACAGTAATTCTT;Hits=384;Alias=CELE1;Class=23H-RNA	TRUE
I	352459	352481	35	-	ID=TAGCGAAAACTACAGTAATTCTT;Hits=331;Alias=CELE1;Class=23H-RNA	TRUE
I	359840	359860	27	-	ID=CCGCATTTTTTGTAGATCAAA;Hits=974;Alias=CELE14B;Class=23H-RNA	TRUE
I	359840	359861	25	+	ID=TTTGATCTACAAAAAATGCGGG;Hits=878;Alias=CELE14B;Class=23H-RNA	TRUE
I	359840	359862	171	-	ID=TCCCGCATTTTTTGTAGATCAAA;Hits=830;Alias=CELE14B;Class=23H-RNA	TRUE
I	359841	359862	78	-	ID=TCCCGCATTTTTTGTAGATCAA;Hits=1072;Alias=CELE14B;Class=23H-RNA	TRUE
I	359842	359863	15	-	ID=TTCCCGCATTTTTTGTAGATCA;Hits=857;Alias=CELE14B;Class=23H-RNA	TRUE
I	359842	359864	76	+	ID=TGATCTACAAAAAATGCGGGAAT;Hits=762;Alias=CELE14B;Class=23H-RNA	TRUE
I	359842	359865	23	+	ID=TGATCTACAAAAAATGCGGGAATT;Hits=693;Alias=CELE14B;Class=23H-RNA	TRUE
I	359843	359863	5	-	ID=TTCCCGCATTTTTTGTAGATC;Hits=922;Alias=CELE14B;Class=23H-RNA	TRUE
I	367985	368006	6	+	ID=AATTCTCGTTCTCTCCACACAC;Hits=1;Alias=R119.7,rnp-8;Class=23H-RNA	TRUE
I	389907	389929	13	+	ID=AGCGAAAACTACAGTAATTCTTT;Hits=342;Alias=CELE1;Class=23H-RNA	TRUE
I	389937	389959	54	-	ID=ATCGACACAAGCGCTACAGTAGT;Hits=211;Alias=CELE1;Class=23H-RNA	TRUE
I	389938	389959	12	-	ID=ATCGACACAAGCGCTACAGTAG;Hits=228;Alias=CELE1;Class=23H-RNA	TRUE
I	389939	389960	15	+	ID=TACTGTAGCGCTTGTGTCGATT;Hits=262;Alias=CELE1;Class=23H-RNA	TRUE
I	389939	389961	14	+	ID=TACTGTAGCGCTTGTGTCGATTT;Hits=253;Alias=CELE1;Class=23H-RNA	TRUE
I	427359	427381	76	-	ID=TGATCTACAAAAAATGCGGGAAT;Hits=762;Alias=CELE14B;Class=23H-RNA	TRUE
I	432175	432196	2477	+	ID=AGACGCGCGCACTCCCAACTCG;Hits=43;Alias=TC5A;Class=23H-RNA	FALSE
I	442880	442903	23	-	ID=TGATCTACAAAAAATGCGGGAATT;Hits=693;Alias=CELE14B;Class=23H-RNA	TRUE
I	442881	442903	76	-	ID=TGATCTACAAAAAATGCGGGAAT;Hits=762;Alias=CELE14B;Class=23H-RNA	TRUE
I	442882	442902	5	+	ID=TTCCCGCATTTTTTGTAGATC;Hits=922;Alias=CELE14B;Class=23H-RNA	TRUE
I	442882	442903	15	+	ID=TTCCCGCATTTTTTGTAGATCA;Hits=857;Alias=CELE14B;Class=23H-RNA	TRUE
I	442883	442904	78	+	ID=TCCCGCATTTTTTGTAGATCAA;Hits=1072;Alias=CELE14B;Class=23H-RNA	TRUE
I	442883	442905	171	+	ID=TCCCGCATTTTTTGTAGATCAAA;Hits=830;Alias=CELE14B;Class=23H-RNA	TRUE
I	442884	442905	25	-	ID=TTTGATCTACAAAAAATGCGGG;Hits=878;Alias=CELE14B;Class=23H-RNA	TRUE
I	442885	442905	27	+	ID=CCGCATTTTTTGTAGATCAAA;Hits=974;Alias=CELE14B;Class=23H-RNA	TRUE
I	442885	442907	27	+	ID=CCGCATTTTTTGTAGATCAAACC;Hits=693;Alias=CELE14B;Class=23H-RNA	TRUE
I	442886	442907	6	+	ID=CGCATTTTTTGTAGATCAAACC;Hits=732;Alias=CELE14B;Class=23H-RNA	TRUE
I	442886	442908	53	+	ID=CGCATTTTTTGTAGATCAAACCG;Hits=649;Alias=CELE14B;Class=23H-RNA	TRUE
I	442887	442910	11	-	ID=TACGGTTTGATCTACAAAAAATGC;Hits=344;Alias=CELE14B;Class=23H-RNA	TRUE
I	447413	447435	54	-	ID=ATCGACACAAGCGCTACAGTAGT;Hits=211;Alias=CELE1;Class=23H-RNA	TRUE
I	447414	447435	12	-	ID=ATCGACACAAGCGCTACAGTAG;Hits=228;Alias=CELE1;Class=23H-RNA	TRUE
I	447415	447436	15	+	ID=TACTGTAGCGCTTGTGTCGATT;Hits=262;Alias=CELE1;Class=23H-RNA	TRUE
I	447415	447437	14	+	ID=TACTGTAGCGCTTGTGTCGATTT;Hits=253;Alias=CELE1;Class=23H-RNA	TRUE
I	447548	447570	13	-	ID=AGCGAAAACTACAGTAATTCTTT;Hits=342;Alias=CELE1;Class=23H-RNA	TRUE
I	447549	447570	7	-	ID=AGCGAAAACTACAGTAATTCTT;Hits=384;Alias=CELE1;Class=23H-RNA	TRUE
I	447549	447571	35	-	ID=TAGCGAAAACTACAGTAATTCTT;Hits=331;Alias=CELE1;Class=23H-RNA	TRUE
I	449795	449816	16	-	ID=AGCGAAAACTACAGTAAGAACT;Hits=38;Alias=PALTA4;Class=23H-RNA	TRUE
I	449795	449817	52	-	ID=TAGCGAAAACTACAGTAAGAACT;Hits=37;Alias=PALTA4;Class=23H-RNA	TRUE
I	449797	449819	32	+	ID=TTCTTACTGTAGTTTTCGCTAAG;Hits=36;Alias=PALTA4;Class=23H-RNA	TRUE
I	449798	449819	12	+	ID=TCTTACTGTAGTTTTCGCTAAG;Hits=59;Alias=PALTA4;Class=23H-RNA	TRUE
I	449798	449820	20	+	ID=TCTTACTGTAGTTTTCGCTAAGA;Hits=58;Alias=PALTA4;Class=23H-RNA	TRUE
I	449860	449882	7	+	ID=TCATGATTTATTGTTCCCGTAAT;Hits=53;Alias=PALTA4;Class=23H-RNA	TRUE
I	449862	449882	5	+	ID=ATGATTTATTGTTCCCGTAAT;Hits=54;Alias=PALTA4;Class=23H-RNA	TRUE
I	454209	454230	29	+	ID=CGGAAATTCGTTGATTGAGACA;Hits=26;Alias=other;Class=23H-RNA	TRUE
I	464139	464161	76	-	ID=TGATCTACAAAAAATGCGGGAAT;Hits=762;Alias=CELE14B;Class=23H-RNA	TRUE
I	464140	464160	5	+	ID=TTCCCGCATTTTTTGTAGATC;Hits=922;Alias=CELE14B;Class=23H-RNA	TRUE
I	464140	464161	15	+	ID=TTCCCGCATTTTTTGTAGATCA;Hits=857;Alias=CELE14B;Class=23H-RNA	TRUE
I	464141	464163	5	+	ID=TCCCGCATTTTTTGTAGATCACA;Hits=48;Alias=CELE14B;Class=23H-RNA	TRUE
I	472278	472299	23	+	ID=TATACCACTCTATCAGACTACT;Hits=1;Alias=W04C9.8;Class=23H-RNA	TRUE
I	487203	487226	23	-	ID=TGATCTACAAAAAATGCGGGAATT;Hits=693;Alias=CELE14B;Class=23H-RNA	TRUE
I	487204	487226	76	-	ID=TGATCTACAAAAAATGCGGGAAT;Hits=762;Alias=CELE14B;Class=23H-RNA	TRUE
I	487205	487225	5	+	ID=TTCCCGCATTTTTTGTAGATC;Hits=922;Alias=CELE14B;Class=23H-RNA	TRUE
I	487205	487226	15	+	ID=TTCCCGCATTTTTTGTAGATCA;Hits=857;Alias=CELE14B;Class=23H-RNA	TRUE
I	487206	487227	78	+	ID=TCCCGCATTTTTTGTAGATCAA;Hits=1072;Alias=CELE14B;Class=23H-RNA	TRUE
I	487206	487228	171	+	ID=TCCCGCATTTTTTGTAGATCAAA;Hits=830;Alias=CELE14B;Class=23H-RNA	TRUE
I	487207	487228	25	-	ID=TTTGATCTACAAAAAATGCGGG;Hits=878;Alias=CELE14B;Class=23H-RNA	TRUE
I	487208	487228	27	+	ID=CCGCATTTTTTGTAGATCAAA;Hits=974;Alias=CELE14B;Class=23H-RNA	TRUE
I	487208	487230	27	+	ID=CCGCATTTTTTGTAGATCAAACC;Hits=693;Alias=CELE14B;Class=23H-RNA	TRUE
I	487209	487230	6	+	ID=CGCATTTTTTGTAGATCAAACC;Hits=732;Alias=CELE14B;Class=23H-RNA	TRUE
I	487209	487231	53	+	ID=CGCATTTTTTGTAGATCAAACCG;Hits=649;Alias=CELE14B;Class=23H-RNA	TRUE
I	487229	487251	83	+	ID=CCGTGATGGGACAGCCTGACACC;Hits=21;Alias=CELE14B;Class=23H-RNA	FALSE
I	496971	496994	11	+	ID=TACGGTTTGATCTACAAAAAATGC;Hits=344;Alias=CELE14B;Class=23H-RNA	TRUE
I	496974	496995	6	-	ID=CGCATTTTTTGTAGATCAAACC;Hits=732;Alias=CELE14B;Class=23H-RNA	TRUE
I	497299	497321	14	-	ID=TACTGTAGCGCTTGTGTCGATTT;Hits=253;Alias=CELE1;Class=23H-RNA	TRUE
I	497300	497321	15	-	ID=TACTGTAGCGCTTGTGTCGATT;Hits=262;Alias=CELE1;Class=23H-RNA	TRUE
I	497301	497322	12	+	ID=ATCGACACAAGCGCTACAGTAG;Hits=228;Alias=CELE1;Class=23H-RNA	TRUE
I	497301	497323	54	+	ID=ATCGACACAAGCGCTACAGTAGT;Hits=211;Alias=CELE1;Class=23H-RNA	TRUE
I	501015	501037	53	-	ID=CGCATTTTTTGTAGATCAAACCG;Hits=649;Alias=CELE14B;Class=23H-RNA	TRUE
I	501016	501037	6	-	ID=CGCATTTTTTGTAGATCAAACC;Hits=732;Alias=CELE14B;Class=23H-RNA	TRUE
I	501016	501038	27	-	ID=CCGCATTTTTTGTAGATCAAACC;Hits=693;Alias=CELE14B;Class=23H-RNA	TRUE
I	501018	501038	27	-	ID=CCGCATTTTTTGTAGATCAAA;Hits=974;Alias=CELE14B;Class=23H-RNA	TRUE
I	501018	501039	25	+	ID=TTTGATCTACAAAAAATGCGGG;Hits=878;Alias=CELE14B;Class=23H-RNA	TRUE
I	501018	501040	171	-	ID=TCCCGCATTTTTTGTAGATCAAA;Hits=830;Alias=CELE14B;Class=23H-RNA	TRUE
I	501113	501136	23	-	ID=TGATCTACAAAAAATGCGGGAATT;Hits=693;Alias=CELE14B;Class=23H-RNA	TRUE
I	501114	501136	76	-	ID=TGATCTACAAAAAATGCGGGAAT;Hits=762;Alias=CELE14B;Class=23H-RNA	TRUE
I	501115	501135	5	+	ID=TTCCCGCATTTTTTGTAGATC;Hits=922;Alias=CELE14B;Class=23H-RNA	TRUE
I	501115	501136	15	+	ID=TTCCCGCATTTTTTGTAGATCA;Hits=857;Alias=CELE14B;Class=23H-RNA	TRUE
I	501116	501137	78	+	ID=TCCCGCATTTTTTGTAGATCAA;Hits=1072;Alias=CELE14B;Class=23H-RNA	TRUE
I	501116	501138	171	+	ID=TCCCGCATTTTTTGTAGATCAAA;Hits=830;Alias=CELE14B;Class=23H-RNA	TRUE
I	501117	501138	25	-	ID=TTTGATCTACAAAAAATGCGGG;Hits=878;Alias=CELE14B;Class=23H-RNA	TRUE
I	501118	501138	27	+	ID=CCGCATTTTTTGTAGATCAAA;Hits=974;Alias=CELE14B;Class=23H-RNA	TRUE
I	501118	501140	27	+	ID=CCGCATTTTTTGTAGATCAAACC;Hits=693;Alias=CELE14B;Class=23H-RNA	TRUE
I	501119	501140	6	+	ID=CGCATTTTTTGTAGATCAAACC;Hits=732;Alias=CELE14B;Class=23H-RNA	TRUE
I	501119	501141	53	+	ID=CGCATTTTTTGTAGATCAAACCG;Hits=649;Alias=CELE14B;Class=23H-RNA	TRUE
I	501120	501143	11	-	ID=TACGGTTTGATCTACAAAAAATGC;Hits=344;Alias=CELE14B;Class=23H-RNA	TRUE
I	502192	502214	53	-	ID=CGCATTTTTTGTAGATCAAACCG;Hits=649;Alias=CELE14B;Class=23H-RNA	TRUE
I	502193	502214	6	-	ID=CGCATTTTTTGTAGATCAAACC;Hits=732;Alias=CELE14B;Class=23H-RNA	TRUE
I	502193	502215	27	-	ID=CCGCATTTTTTGTAGATCAAACC;Hits=693;Alias=CELE14B;Class=23H-RNA	TRUE
I	502195	502215	27	-	ID=CCGCATTTTTTGTAGATCAAA;Hits=974;Alias=CELE14B;Class=23H-RNA	TRUE
I	502195	502216	25	+	ID=TTTGATCTACAAAAAATGCGGG;Hits=878;Alias=CELE14B;Class=23H-RNA	TRUE
I	502195	502217	171	-	ID=TCCCGCATTTTTTGTAGATCAAA;Hits=830;Alias=CELE14B;Class=23H-RNA	TRUE
I	502256	502279	23	-	ID=TGATCTACAAAAAATGCGGGAATT;Hits=693;Alias=CELE14B;Class=23H-RNA	TRUE
I	502257	502279	76	-	ID=TGATCTACAAAAAATGCGGGAAT;Hits=762;Alias=CELE14B;Class=23H-RNA	TRUE
I	502258	502278	5	+	ID=TTCCCGCATTTTTTGTAGATC;Hits=922;Alias=CELE14B;Class=23H-RNA	TRUE
I	502258	502279	15	+	ID=TTCCCGCATTTTTTGTAGATCA;Hits=857;Alias=CELE14B;Class=23H-RNA	TRUE
I	502259	502280	78	+	ID=TCCCGCATTTTTTGTAGATCAA;Hits=1072;Alias=CELE14B;Class=23H-RNA	TRUE
I	502259	502281	171	+	ID=TCCCGCATTTTTTGTAGATCAAA;Hits=830;Alias=CELE14B;Class=23H-RNA	TRUE
I	502260	502281	25	-	ID=TTTGATCTACAAAAAATGCGGG;Hits=878;Alias=CELE14B;Class=23H-RNA	TRUE
I	502261	502281	27	+	ID=CCGCATTTTTTGTAGATCAAA;Hits=974;Alias=CELE14B;Class=23H-RNA	TRUE
I	502261	502283	27	+	ID=CCGCATTTTTTGTAGATCAAACC;Hits=693;Alias=CELE14B;Class=23H-RNA	TRUE
I	502262	502283	6	+	ID=CGCATTTTTTGTAGATCAAACC;Hits=732;Alias=CELE14B;Class=23H-RNA	TRUE
I	502647	502670	23	-	ID=TGATCTACAAAAAATGCGGGAATT;Hits=693;Alias=CELE14B;Class=23H-RNA	TRUE
I	502648	502670	76	-	ID=TGATCTACAAAAAATGCGGGAAT;Hits=762;Alias=CELE14B;Class=23H-RNA	TRUE
I	502649	502669	5	+	ID=TTCCCGCATTTTTTGTAGATC;Hits=922;Alias=CELE14B;Class=23H-RNA	TRUE
I	502649	502670	15	+	ID=TTCCCGCATTTTTTGTAGATCA;Hits=857;Alias=CELE14B;Class=23H-RNA	TRUE
I	502650	502671	78	+	ID=TCCCGCATTTTTTGTAGATCAA;Hits=1072;Alias=CELE14B;Class=23H-RNA	TRUE
I	502650	502672	171	+	ID=TCCCGCATTTTTTGTAGATCAAA;Hits=830;Alias=CELE14B;Class=23H-RNA	TRUE
I	502651	502672	25	-	ID=TTTGATCTACAAAAAATGCGGG;Hits=878;Alias=CELE14B;Class=23H-RNA	TRUE
I	502652	502672	27	+	ID=CCGCATTTTTTGTAGATCAAA;Hits=974;Alias=CELE14B;Class=23H-RNA	TRUE
I	502652	502674	27	+	ID=CCGCATTTTTTGTAGATCAAACC;Hits=693;Alias=CELE14B;Class=23H-RNA	TRUE
I	502653	502674	6	+	ID=CGCATTTTTTGTAGATCAAACC;Hits=732;Alias=CELE14B;Class=23H-RNA	TRUE
I	514642	514662	17	-	ID=TTACCTATCGGCTTTAAATGT;Hits=87;Alias=PALTTAA3;Class=23H-RNA	TRUE
I	514644	514664	5	+	ID=ATTTAAAGCCGATAGGTAACC;Hits=91;Alias=PALTTAA3;Class=23H-RNA	TRUE
I	522278	522300	9	-	ID=CGCATTTTTCGTAGATCAAACCG;Hits=57;Alias=CELE14B;Class=23H-RNA	TRUE
I	522281	522303	67	-	ID=TCCCGCATTTTTCGTAGATCAAA;Hits=98;Alias=CELE14B;Class=23H-RNA	TRUE
I	522281	522303	9	+	ID=TTTGATCTACGAAAAATGCGGGA;Hits=98;Alias=CELE14B;Class=23H-RNA	TRUE
I	525376	525399	23	-	ID=TGATCTACAAAAAATGCGGGAATT;Hits=693;Alias=CELE14B;Class=23H-RNA	TRUE
I	525377	525399	76	-	ID=TGATCTACAAAAAATGCGGGAAT;Hits=762;Alias=CELE14B;Class=23H-RNA	TRUE
I	525378	525398	5	+	ID=TTCCCGCATTTTTTGTAGATC;Hits=922;Alias=CELE14B;Class=23H-RNA	TRUE
I	525378	525399	15	+	ID=TTCCCGCATTTTTTGTAGATCA;Hits=857;Alias=CELE14B;Class=23H-RNA	TRUE
I	525379	525400	78	+	ID=TCCCGCATTTTTTGTAGATCAA;Hits=1072;Alias=CELE14B;Class=23H-RNA	TRUE
I	525379	525401	171	+	ID=TCCCGCATTTTTTGTAGATCAAA;Hits=830;Alias=CELE14B;Class=23H-RNA	TRUE
I	525380	525401	25	-	ID=TTTGATCTACAAAAAATGCGGG;Hits=878;Alias=CELE14B;Class=23H-RNA	TRUE
I	525381	525401	27	+	ID=CCGCATTTTTTGTAGATCAAA;Hits=974;Alias=CELE14B;Class=23H-RNA	TRUE
I	525381	525403	27	+	ID=CCGCATTTTTTGTAGATCAAACC;Hits=693;Alias=CELE14B;Class=23H-RNA	TRUE
I	525382	525403	6	+	ID=CGCATTTTTTGTAGATCAAACC;Hits=732;Alias=CELE14B;Class=23H-RNA	TRUE
I	525382	525404	53	+	ID=CGCATTTTTTGTAGATCAAACCG;Hits=649;Alias=CELE14B;Class=23H-RNA	TRUE
I	525383	525406	11	-	ID=TACGGTTTGATCTACAAAAAATGC;Hits=344;Alias=CELE14B;Class=23H-RNA	TRUE
I	533339	533360	5	+	ID=ACCGGTACAGAGAGTGTGGATA;Hits=2;Alias=other;Class=23H-RNA	TRUE
I	533361	533382	10	-	ID=CGGATGTCTGTCACTCTCTAAC;Hits=53;Alias=Unknown_RE1;Class=23H-RNA	TRUE
I	533361	533383	16	-	ID=CCGGATGTCTGTCACTCTCTAAC;Hits=50;Alias=Unknown_RE1;Class=23H-RNA	TRUE
I	533362	533384	41	+	ID=TTAGAGAGTGACAGACATCCGGG;Hits=49;Alias=Unknown_RE1;Class=23H-RNA	TRUE
I	533364	533385	14	-	ID=TCCCGGATGTCTGTCACTCTCT;Hits=50;Alias=Unknown_RE1;Class=23H-RNA	TRUE
I	533366	533386	10	+	ID=AGAGTGACAGACATCCGGGAC;Hits=53;Alias=Unknown_RE1;Class=23H-RNA	TRUE
I	533366	533387	44	+	ID=AGAGTGACAGACATCCGGGACC;Hits=52;Alias=Unknown_RE1;Class=23H-RNA	TRUE
I	533366	533388	8	+	ID=AGAGTGACAGACATCCGGGACCC;Hits=48;Alias=Unknown_RE1;Class=23H-RNA	TRUE
I	533399	533420	14	-	ID=CAAATCGTCTCTTCCGCGCGCC;Hits=55;Alias=Unknown_RE1;Class=23H-RNA	TRUE
I	533469	533490	14	+	ID=CAAATCGTCTCTTCCGCGCGCC;Hits=55;Alias=Unknown_RE1;Class=23H-RNA	TRUE
I	533527	533549	24	+	ID=ACTATCTACACTCTCTGTACCGG;Hits=68;Alias=Unknown_RE1;Class=23H-RNA	TRUE
I	533528	533549	220	+	ID=CTATCTACACTCTCTGTACCGG;Hits=69;Alias=Unknown_RE1;Class=23H-RNA	TRUE
I	533529	533549	20	+	ID=TATCTACACTCTCTGTACCGG;Hits=70;Alias=Unknown_RE1;Class=23H-RNA	TRUE
I	551227	551249	9	-	ID=TTTGATCTACGAAAAATGCGGGA;Hits=98;Alias=CELE14B;Class=23H-RNA	TRUE
I	551230	551252	9	+	ID=CGCATTTTTCGTAGATCAAACCG;Hits=57;Alias=CELE14B;Class=23H-RNA	TRUE
I	551589	551611	171	+	ID=TCCCGCATTTTTTGTAGATCAAA;Hits=830;Alias=CELE14B;Class=23H-RNA	TRUE
I	551590	551611	25	-	ID=TTTGATCTACAAAAAATGCGGG;Hits=878;Alias=CELE14B;Class=23H-RNA	TRUE
I	551591	551611	27	+	ID=CCGCATTTTTTGTAGATCAAA;Hits=974;Alias=CELE14B;Class=23H-RNA	TRUE
I	564386	564407	6	+	ID=CGCATTTTTTGTAGATCAACGT;Hits=155;Alias=CELE14B;Class=23H-RNA	TRUE
I	568123	568145	9	-	ID=CGCATTTTTCGTAGATCAAACCG;Hits=57;Alias=CELE14B;Class=23H-RNA	TRUE
I	568126	568148	67	-	ID=TCCCGCATTTTTCGTAGATCAAA;Hits=98;Alias=CELE14B;Class=23H-RNA	TRUE
I	568126	568148	9	+	ID=TTTGATCTACGAAAAATGCGGGA;Hits=98;Alias=CELE14B;Class=23H-RNA	TRUE
I	591181	591204	23	-	ID=TGATCTACAAAAAATGCGGGAATT;Hits=693;Alias=CELE14B;Class=23H-RNA	TRUE
I	591182	591204	76	-	ID=TGATCTACAAAAAATGCGGGAAT;Hits=762;Alias=CELE14B;Class=23H-RNA	TRUE
I	591183	591203	5	+	ID=TTCCCGCATTTTTTGTAGATC;Hits=922;Alias=CELE14B;Class=23H-RNA	TRUE
I	591183	591204	15	+	ID=TTCCCGCATTTTTTGTAGATCA;Hits=857;Alias=CELE14B;Class=23H-RNA	TRUE
I	591184	591205	78	+	ID=TCCCGCATTTTTTGTAGATCAA;Hits=1072;Alias=CELE14B;Class=23H-RNA	TRUE
I	591184	591206	171	+	ID=TCCCGCATTTTTTGTAGATCAAA;Hits=830;Alias=CELE14B;Class=23H-RNA	TRUE
I	591185	591206	25	-	ID=TTTGATCTACAAAAAATGCGGG;Hits=878;Alias=CELE14B;Class=23H-RNA	TRUE
I	591186	591206	27	+	ID=CCGCATTTTTTGTAGATCAAA;Hits=974;Alias=CELE14B;Class=23H-RNA	TRUE
I	591186	591208	27	+	ID=CCGCATTTTTTGTAGATCAAACC;Hits=693;Alias=CELE14B;Class=23H-RNA	TRUE
I	591187	591208	6	+	ID=CGCATTTTTTGTAGATCAAACC;Hits=732;Alias=CELE14B;Class=23H-RNA	TRUE
I	591187	591209	53	+	ID=CGCATTTTTTGTAGATCAAACCG;Hits=649;Alias=CELE14B;Class=23H-RNA	TRUE
I	596956	596979	127	+	ID=TGCGTGGCGTGTACTGCAGAAAAC;Hits=157;Alias=PALTA3;Class=23H-RNA	FALSE
I	596957	596977	16	-	ID=TTTCTGCAGTACACGCCACGC;Hits=166;Alias=PALTA3;Class=23H-RNA	TRUE
I	596957	596978	6	-	ID=TTTTCTGCAGTACACGCCACGC;Hits=162;Alias=PALTA3;Class=23H-RNA	TRUE
I	596960	596981	54	+	ID=TGGCGTGTACTGCAGAAAACCT;Hits=162;Alias=PALTA3;Class=23H-RNA	TRUE
I	596962	596983	7	-	ID=TTAGGTTTTCTGCAGTACACGC;Hits=89;Alias=PALTA3;Class=23H-RNA	TRUE
I	597049	597071	38	-	ID=CGTGAGATGTCGGCGGCCTGATA;Hits=53;Alias=PALTA3;Class=23H-RNA	TRUE
I	597051	597073	12	+	ID=TCAGGCCGCCGACATCTCACGGG;Hits=50;Alias=PALTA3;Class=23H-RNA	TRUE
I	597072	597094	6	-	ID=TAAACGCAGCGGCGCGCGGAACC;Hits=23;Alias=PALTA3;Class=23H-RNA	TRUE
I	597073	597095	486	-	ID=TTAAACGCAGCGGCGCGCGGAAC;Hits=27;Alias=PALTA3;Class=23H-RNA	TRUE
I	597075	597097	12	+	ID=TCCGCGCGCCGCTGCGTTTAACT;Hits=30;Alias=PALTA3;Class=23H-RNA	TRUE
I	597158	597180	12	-	ID=TCAGGCCGCCGACATCTCACGGG;Hits=50;Alias=PALTA3;Class=23H-RNA	TRUE
I	597160	597182	38	+	ID=CGTGAGATGTCGGCGGCCTGATA;Hits=53;Alias=PALTA3;Class=23H-RNA	TRUE
I	597249	597270	7	+	ID=TTAGGTTTTCTGCAGTACACGC;Hits=89;Alias=PALTA3;Class=23H-RNA	TRUE
I	597251	597272	54	-	ID=TGGCGTGTACTGCAGAAAACCT;Hits=162;Alias=PALTA3;Class=23H-RNA	TRUE
I	597253	597276	127	-	ID=TGCGTGGCGTGTACTGCAGAAAAC;Hits=157;Alias=PALTA3;Class=23H-RNA	FALSE
I	597254	597275	6	+	ID=TTTTCTGCAGTACACGCCACGC;Hits=162;Alias=PALTA3;Class=23H-RNA	TRUE
I	597255	597275	16	+	ID=TTTCTGCAGTACACGCCACGC;Hits=166;Alias=PALTA3;Class=23H-RNA	TRUE
I	597260	597282	197	-	ID=TAAAACTGCGTGGCGTGTACTGC;Hits=73;Alias=PALTA3;Class=23H-RNA	FALSE
I	597270	597292	183	-	ID=CTCAAAATAATAAAACTGCGTGG;Hits=86;Alias=PALTA3;Class=23H-RNA	FALSE
I	597272	597292	116	-	ID=CTCAAAATAATAAAACTGCGT;Hits=97;Alias=PALTA3;Class=23H-RNA	FALSE
I	607117	607140	23	-	ID=TGATCTACAAAAAATGCGGGAATT;Hits=693;Alias=CELE14B;Class=23H-RNA	TRUE
I	607118	607140	76	-	ID=TGATCTACAAAAAATGCGGGAAT;Hits=762;Alias=CELE14B;Class=23H-RNA	TRUE
I	607119	607139	5	+	ID=TTCCCGCATTTTTTGTAGATC;Hits=922;Alias=CELE14B;Class=23H-RNA	TRUE
I	607119	607140	15	+	ID=TTCCCGCATTTTTTGTAGATCA;Hits=857;Alias=CELE14B;Class=23H-RNA	TRUE
I	607120	607141	78	+	ID=TCCCGCATTTTTTGTAGATCAA;Hits=1072;Alias=CELE14B;Class=23H-RNA	TRUE
I	607120	607142	171	+	ID=TCCCGCATTTTTTGTAGATCAAA;Hits=830;Alias=CELE14B;Class=23H-RNA	TRUE
I	607121	607142	25	-	ID=TTTGATCTACAAAAAATGCGGG;Hits=878;Alias=CELE14B;Class=23H-RNA	TRUE
I	607122	607142	27	+	ID=CCGCATTTTTTGTAGATCAAA;Hits=974;Alias=CELE14B;Class=23H-RNA	TRUE
I	607122	607144	27	+	ID=CCGCATTTTTTGTAGATCAAACC;Hits=693;Alias=CELE14B;Class=23H-RNA	TRUE
I	607123	607144	6	+	ID=CGCATTTTTTGTAGATCAAACC;Hits=732;Alias=CELE14B;Class=23H-RNA	TRUE
I	613595	613617	76	-	ID=TGATCTACAAAAAATGCGGGAAT;Hits=762;Alias=CELE14B;Class=23H-RNA	TRUE
I	613597	613618	78	+	ID=TCCCGCATTTTTTGTAGATCAA;Hits=1072;Alias=CELE14B;Class=23H-RNA	TRUE
I	613597	613619	171	+	ID=TCCCGCATTTTTTGTAGATCAAA;Hits=830;Alias=CELE14B;Class=23H-RNA	TRUE
I	613598	613619	25	-	ID=TTTGATCTACAAAAAATGCGGG;Hits=878;Alias=CELE14B;Class=23H-RNA	TRUE
I	613599	613619	27	+	ID=CCGCATTTTTTGTAGATCAAA;Hits=974;Alias=CELE14B;Class=23H-RNA	TRUE
I	613599	613621	27	+	ID=CCGCATTTTTTGTAGATCAAACC;Hits=693;Alias=CELE14B;Class=23H-RNA	TRUE
I	613600	613621	6	+	ID=CGCATTTTTTGTAGATCAAACC;Hits=732;Alias=CELE14B;Class=23H-RNA	TRUE
I	613600	613622	53	+	ID=CGCATTTTTTGTAGATCAAACCG;Hits=649;Alias=CELE14B;Class=23H-RNA	TRUE
I	614123	614145	54	-	ID=ATCGACACAAGCGCTACAGTAGT;Hits=211;Alias=CELE1;Class=23H-RNA	TRUE
I	614124	614145	12	-	ID=ATCGACACAAGCGCTACAGTAG;Hits=228;Alias=CELE1;Class=23H-RNA	TRUE
I	614125	614146	15	+	ID=TACTGTAGCGCTTGTGTCGATT;Hits=262;Alias=CELE1;Class=23H-RNA	TRUE
I	614125	614147	14	+	ID=TACTGTAGCGCTTGTGTCGATTT;Hits=253;Alias=CELE1;Class=23H-RNA	TRUE
I	614268	614289	7	-	ID=AGCGAAAACTACAGTAATTCTT;Hits=384;Alias=CELE1;Class=23H-RNA	TRUE
I	614268	614290	35	-	ID=TAGCGAAAACTACAGTAATTCTT;Hits=331;Alias=CELE1;Class=23H-RNA	TRUE
I	615040	615060	27	-	ID=CCGCATTTTTTGTAGATCAAA;Hits=974;Alias=CELE14B;Class=23H-RNA	TRUE
I	615040	615062	171	-	ID=TCCCGCATTTTTTGTAGATCAAA;Hits=830;Alias=CELE14B;Class=23H-RNA	TRUE
I	615041	615062	78	-	ID=TCCCGCATTTTTTGTAGATCAA;Hits=1072;Alias=CELE14B;Class=23H-RNA	TRUE
I	615042	615063	15	-	ID=TTCCCGCATTTTTTGTAGATCA;Hits=857;Alias=CELE14B;Class=23H-RNA	TRUE
I	615042	615064	76	+	ID=TGATCTACAAAAAATGCGGGAAT;Hits=762;Alias=CELE14B;Class=23H-RNA	TRUE
I	615042	615065	23	+	ID=TGATCTACAAAAAATGCGGGAATT;Hits=693;Alias=CELE14B;Class=23H-RNA	TRUE
I	615043	615063	5	-	ID=TTCCCGCATTTTTTGTAGATC;Hits=922;Alias=CELE14B;Class=23H-RNA	TRUE
I	616181	616204	11	+	ID=TACGGTTTGATCTACAAAAAATGC;Hits=344;Alias=CELE14B;Class=23H-RNA	TRUE
I	616183	616205	53	-	ID=CGCATTTTTTGTAGATCAAACCG;Hits=649;Alias=CELE14B;Class=23H-RNA	TRUE
I	616184	616205	6	-	ID=CGCATTTTTTGTAGATCAAACC;Hits=732;Alias=CELE14B;Class=23H-RNA	TRUE
I	616184	616206	27	-	ID=CCGCATTTTTTGTAGATCAAACC;Hits=693;Alias=CELE14B;Class=23H-RNA	TRUE
I	616186	616206	27	-	ID=CCGCATTTTTTGTAGATCAAA;Hits=974;Alias=CELE14B;Class=23H-RNA	TRUE
I	616186	616207	25	+	ID=TTTGATCTACAAAAAATGCGGG;Hits=878;Alias=CELE14B;Class=23H-RNA	TRUE
I	616186	616208	171	-	ID=TCCCGCATTTTTTGTAGATCAAA;Hits=830;Alias=CELE14B;Class=23H-RNA	TRUE
I	616187	616208	78	-	ID=TCCCGCATTTTTTGTAGATCAA;Hits=1072;Alias=CELE14B;Class=23H-RNA	TRUE
I	616188	616209	15	-	ID=TTCCCGCATTTTTTGTAGATCA;Hits=857;Alias=CELE14B;Class=23H-RNA	TRUE
I	616188	616210	76	+	ID=TGATCTACAAAAAATGCGGGAAT;Hits=762;Alias=CELE14B;Class=23H-RNA	TRUE
I	616188	616211	23	+	ID=TGATCTACAAAAAATGCGGGAATT;Hits=693;Alias=CELE14B;Class=23H-RNA	TRUE
I	616189	616209	5	-	ID=TTCCCGCATTTTTTGTAGATC;Hits=922;Alias=CELE14B;Class=23H-RNA	TRUE
I	616939	616961	13	-	ID=AGCGAAAACTACAGTAATTCTTT;Hits=342;Alias=CELE1;Class=23H-RNA	TRUE
I	616940	616961	7	-	ID=AGCGAAAACTACAGTAATTCTT;Hits=384;Alias=CELE1;Class=23H-RNA	TRUE
I	616940	616962	35	-	ID=TAGCGAAAACTACAGTAATTCTT;Hits=331;Alias=CELE1;Class=23H-RNA	TRUE
I	622806	622827	7	-	ID=AGCGAAAACTACAGTAATTCTT;Hits=384;Alias=CELE1;Class=23H-RNA	TRUE
I	622806	622828	35	-	ID=TAGCGAAAACTACAGTAATTCTT;Hits=331;Alias=CELE1;Class=23H-RNA	TRUE
I	629669	629691	7	-	ID=CAAAATTGGCGGAGCGATCGTTC;Hits=10;Alias=other;Class=23H-RNA	TRUE
I	630270	630292	7	+	ID=CAAAATTGGCGGAGCGATCGTTC;Hits=10;Alias=other;Class=23H-RNA	TRUE
I	633385	633407	11	+	ID=TACCTGATTTTCATAACGAGACC;Hits=346;Alias=PAL5A;Class=23H-RNA	TRUE
I	633388	633410	36	-	ID=AGCGGTCTCGTTATGAAAATCAG;Hits=351;Alias=PAL5A;Class=23H-RNA	TRUE
I	633390	633412	22	-	ID=TCAGCGGTCTCGTTATGAAAATC;Hits=354;Alias=PAL5A;Class=23H-RNA	TRUE
I	639000	639023	11	+	ID=TACGGTTTGATCTACAAAAAATGC;Hits=344;Alias=CELE14B;Class=23H-RNA	TRUE
I	639002	639024	53	-	ID=CGCATTTTTTGTAGATCAAACCG;Hits=649;Alias=CELE14B;Class=23H-RNA	TRUE
I	639003	639024	6	-	ID=CGCATTTTTTGTAGATCAAACC;Hits=732;Alias=CELE14B;Class=23H-RNA	TRUE
I	639003	639025	27	-	ID=CCGCATTTTTTGTAGATCAAACC;Hits=693;Alias=CELE14B;Class=23H-RNA	TRUE
I	639005	639025	27	-	ID=CCGCATTTTTTGTAGATCAAA;Hits=974;Alias=CELE14B;Class=23H-RNA	TRUE
I	639005	639026	25	+	ID=TTTGATCTACAAAAAATGCGGG;Hits=878;Alias=CELE14B;Class=23H-RNA	TRUE
I	639005	639027	171	-	ID=TCCCGCATTTTTTGTAGATCAAA;Hits=830;Alias=CELE14B;Class=23H-RNA	TRUE
I	640606	640628	10	+	ID=TGTAGATCACACCGTGATGGGAC;Hits=10;Alias=CELE14B;Class=23H-RNA	TRUE
I	642562	642583	25	-	ID=TTTGATCTACAAAAAATGCGGG;Hits=878;Alias=CELE14B;Class=23H-RNA	TRUE
I	642564	642585	6	+	ID=CGCATTTTTTGTAGATCAAACC;Hits=732;Alias=CELE14B;Class=23H-RNA	TRUE
I	642564	642586	53	+	ID=CGCATTTTTTGTAGATCAAACCG;Hits=649;Alias=CELE14B;Class=23H-RNA	TRUE
I	642565	642588	11	-	ID=TACGGTTTGATCTACAAAAAATGC;Hits=344;Alias=CELE14B;Class=23H-RNA	TRUE
I	644683	644704	6	-	ID=CGCATTTTTTGTAGATCAACGT;Hits=155;Alias=CELE14B;Class=23H-RNA	TRUE
I	645279	645302	23	-	ID=TGATCTACAAAAAATGCGGGAATT;Hits=693;Alias=CELE14B;Class=23H-RNA	TRUE
I	645280	645302	76	-	ID=TGATCTACAAAAAATGCGGGAAT;Hits=762;Alias=CELE14B;Class=23H-RNA	TRUE
I	645281	645301	5	+	ID=TTCCCGCATTTTTTGTAGATC;Hits=922;Alias=CELE14B;Class=23H-RNA	TRUE
I	645281	645302	15	+	ID=TTCCCGCATTTTTTGTAGATCA;Hits=857;Alias=CELE14B;Class=23H-RNA	TRUE
I	645282	645303	78	+	ID=TCCCGCATTTTTTGTAGATCAA;Hits=1072;Alias=CELE14B;Class=23H-RNA	TRUE
I	645282	645304	171	+	ID=TCCCGCATTTTTTGTAGATCAAA;Hits=830;Alias=CELE14B;Class=23H-RNA	TRUE
I	645284	645304	27	+	ID=CCGCATTTTTTGTAGATCAAA;Hits=974;Alias=CELE14B;Class=23H-RNA	TRUE
I	651736	651758	53	-	ID=CGCATTTTTTGTAGATCAAACCG;Hits=649;Alias=CELE14B;Class=23H-RNA	TRUE
I	651737	651758	6	-	ID=CGCATTTTTTGTAGATCAAACC;Hits=732;Alias=CELE14B;Class=23H-RNA	TRUE
I	651737	651759	27	-	ID=CCGCATTTTTTGTAGATCAAACC;Hits=693;Alias=CELE14B;Class=23H-RNA	TRUE
I	651739	651759	27	-	ID=CCGCATTTTTTGTAGATCAAA;Hits=974;Alias=CELE14B;Class=23H-RNA	TRUE
I	651739	651760	25	+	ID=TTTGATCTACAAAAAATGCGGG;Hits=878;Alias=CELE14B;Class=23H-RNA	TRUE
I	651739	651761	171	-	ID=TCCCGCATTTTTTGTAGATCAAA;Hits=830;Alias=CELE14B;Class=23H-RNA	TRUE
I	651740	651761	78	-	ID=TCCCGCATTTTTTGTAGATCAA;Hits=1072;Alias=CELE14B;Class=23H-RNA	TRUE
I	651741	651762	15	-	ID=TTCCCGCATTTTTTGTAGATCA;Hits=857;Alias=CELE14B;Class=23H-RNA	TRUE
I	651741	651763	76	+	ID=TGATCTACAAAAAATGCGGGAAT;Hits=762;Alias=CELE14B;Class=23H-RNA	TRUE
I	651741	651764	23	+	ID=TGATCTACAAAAAATGCGGGAATT;Hits=693;Alias=CELE14B;Class=23H-RNA	TRUE
I	651742	651762	5	-	ID=TTCCCGCATTTTTTGTAGATC;Hits=922;Alias=CELE14B;Class=23H-RNA	TRUE
I	652840	652862	53	-	ID=CGCATTTTTTGTAGATCAAACCG;Hits=649;Alias=CELE14B;Class=23H-RNA	TRUE
I	652841	652862	6	-	ID=CGCATTTTTTGTAGATCAAACC;Hits=732;Alias=CELE14B;Class=23H-RNA	TRUE
I	652841	652863	27	-	ID=CCGCATTTTTTGTAGATCAAACC;Hits=693;Alias=CELE14B;Class=23H-RNA	TRUE
I	652843	652863	27	-	ID=CCGCATTTTTTGTAGATCAAA;Hits=974;Alias=CELE14B;Class=23H-RNA	TRUE
I	652843	652864	25	+	ID=TTTGATCTACAAAAAATGCGGG;Hits=878;Alias=CELE14B;Class=23H-RNA	TRUE
I	652843	652865	171	-	ID=TCCCGCATTTTTTGTAGATCAAA;Hits=830;Alias=CELE14B;Class=23H-RNA	TRUE
I	652844	652865	78	-	ID=TCCCGCATTTTTTGTAGATCAA;Hits=1072;Alias=CELE14B;Class=23H-RNA	TRUE
I	652845	652866	15	-	ID=TTCCCGCATTTTTTGTAGATCA;Hits=857;Alias=CELE14B;Class=23H-RNA	TRUE
I	652845	652867	76	+	ID=TGATCTACAAAAAATGCGGGAAT;Hits=762;Alias=CELE14B;Class=23H-RNA	TRUE
I	652845	652868	23	+	ID=TGATCTACAAAAAATGCGGGAATT;Hits=693;Alias=CELE14B;Class=23H-RNA	TRUE
I	652846	652866	5	-	ID=TTCCCGCATTTTTTGTAGATC;Hits=922;Alias=CELE14B;Class=23H-RNA	TRUE
I	652939	652961	76	-	ID=TGATCTACAAAAAATGCGGGAAT;Hits=762;Alias=CELE14B;Class=23H-RNA	TRUE
I	652940	652960	5	+	ID=TTCCCGCATTTTTTGTAGATC;Hits=922;Alias=CELE14B;Class=23H-RNA	TRUE
I	652940	652961	15	+	ID=TTCCCGCATTTTTTGTAGATCA;Hits=857;Alias=CELE14B;Class=23H-RNA	TRUE
I	653069	653091	13	-	ID=AGCGAAAACTACAGTAATTCTTT;Hits=342;Alias=CELE1;Class=23H-RNA	TRUE
I	653070	653091	7	-	ID=AGCGAAAACTACAGTAATTCTT;Hits=384;Alias=CELE1;Class=23H-RNA	TRUE
I	653070	653092	35	-	ID=TAGCGAAAACTACAGTAATTCTT;Hits=331;Alias=CELE1;Class=23H-RNA	TRUE
I	653581	653602	6	+	ID=CGCATTTTTTGTAGATCAACGT;Hits=155;Alias=CELE14B;Class=23H-RNA	TRUE
I	655381	655403	14	-	ID=TACTGTAGCGCTTGTGTCGATTT;Hits=253;Alias=CELE1;Class=23H-RNA	TRUE
I	655382	655403	15	-	ID=TACTGTAGCGCTTGTGTCGATT;Hits=262;Alias=CELE1;Class=23H-RNA	TRUE
I	655383	655404	12	+	ID=ATCGACACAAGCGCTACAGTAG;Hits=228;Alias=CELE1;Class=23H-RNA	TRUE
I	655383	655405	54	+	ID=ATCGACACAAGCGCTACAGTAGT;Hits=211;Alias=CELE1;Class=23H-RNA	TRUE
I	659885	659907	13	-	ID=AGCGAAAACTACAGTAATTCTTT;Hits=342;Alias=CELE1;Class=23H-RNA	TRUE
I	659886	659907	7	-	ID=AGCGAAAACTACAGTAATTCTT;Hits=384;Alias=CELE1;Class=23H-RNA	TRUE
I	659886	659908	35	-	ID=TAGCGAAAACTACAGTAATTCTT;Hits=331;Alias=CELE1;Class=23H-RNA	TRUE
I	662240	662262	35	+	ID=TAGCGAAAACTACAGTAATTCTT;Hits=331;Alias=CELE1;Class=23H-RNA	TRUE
I	662241	662262	7	+	ID=AGCGAAAACTACAGTAATTCTT;Hits=384;Alias=CELE1;Class=23H-RNA	TRUE
I	662241	662263	13	+	ID=AGCGAAAACTACAGTAATTCTTT;Hits=342;Alias=CELE1;Class=23H-RNA	TRUE
I	666311	666333	10	-	ID=AAATTGTCGGCCGCCGTGAAAAC;Hits=13;Alias=other;Class=23H-RNA	TRUE
I	666313	666335	5	+	ID=TTTCACGGCGGCCGACAATTTCC;Hits=18;Alias=other;Class=23H-RNA	TRUE
I	666314	666335	11	+	ID=TTCACGGCGGCCGACAATTTCC;Hits=19;Alias=other;Class=23H-RNA	TRUE
I	666316	666337	25	-	ID=TCGGAAATTGTCGGCCGCCGTG;Hits=63;Alias=Unknown_hairpin_RE2;Class=23H-RNA	TRUE
I	666318	666339	9	+	ID=CGGCGGCCGACAATTTCCGAGT;Hits=68;Alias=Unknown_hairpin_RE2;Class=23H-RNA	TRUE
I	676553	676574	7	-	ID=CCTTACGATCCTTCTTATCTGA;Hits=57;Alias=Unknown_IR1;Class=23H-RNA	TRUE
I	676553	676575	31	-	ID=CCCTTACGATCCTTCTTATCTGA;Hits=57;Alias=Unknown_IR1;Class=23H-RNA	TRUE
I	676604	676624	10	-	ID=AAGAGCCTCGTGATCCTTTGG;Hits=41;Alias=Unknown_IR1;Class=23H-RNA	TRUE
I	676604	676625	12	+	ID=CCAAAGGATCACGAGGCTCTTC;Hits=41;Alias=Unknown_IR1;Class=23H-RNA	TRUE
I	676606	676628	16	+	ID=AAAGGATCACGAGGCTCTTCCTG;Hits=41;Alias=Unknown_IR1;Class=23H-RNA	TRUE
I	676619	676641	12	-	ID=AGGATCAGAACATCAGGAAGAGC;Hits=41;Alias=Unknown_IR1;Class=23H-RNA	TRUE
I	676621	676643	22	+	ID=TCTTCCTGATGTTCTGATCCTTC;Hits=40;Alias=Unknown_IR1;Class=23H-RNA	TRUE
I	676628	676650	14	-	ID=CGGAGCTGAAGGATCAGAACATC;Hits=20;Alias=Unknown_IR1;Class=23H-RNA	TRUE
I	676687	676708	7	-	ID=CCTTACGATCCTTCTTATCTGA;Hits=57;Alias=Unknown_IR1;Class=23H-RNA	TRUE
I	676687	676709	31	-	ID=CCCTTACGATCCTTCTTATCTGA;Hits=57;Alias=Unknown_IR1;Class=23H-RNA	TRUE
I	676733	676755	27	-	ID=AGCCTCGTGATCCTTTGGAGCTG;Hits=31;Alias=Unknown_IR1;Class=23H-RNA	TRUE
I	676736	676758	6	-	ID=AAGAGCCTCGTGATCCTTTGGAG;Hits=39;Alias=Unknown_IR1;Class=23H-RNA	TRUE
I	676738	676758	10	-	ID=AAGAGCCTCGTGATCCTTTGG;Hits=41;Alias=Unknown_IR1;Class=23H-RNA	TRUE
I	676738	676759	12	+	ID=CCAAAGGATCACGAGGCTCTTC;Hits=41;Alias=Unknown_IR1;Class=23H-RNA	TRUE
I	676738	676760	14	+	ID=CCAAAGGATCACGAGGCTCTTCC;Hits=41;Alias=Unknown_IR1;Class=23H-RNA	TRUE
I	676740	676762	16	+	ID=AAAGGATCACGAGGCTCTTCCTG;Hits=41;Alias=Unknown_IR1;Class=23H-RNA	TRUE
I	676753	676775	12	-	ID=AGGATCAGAACATCAGGAAGAGC;Hits=41;Alias=Unknown_IR1;Class=23H-RNA	TRUE
I	676755	676777	22	+	ID=TCTTCCTGATGTTCTGATCCTTC;Hits=40;Alias=Unknown_IR1;Class=23H-RNA	TRUE
I	678801	678823	22	-	ID=TCTTCCTGATGTTCTGATCCTTC;Hits=40;Alias=Unknown_IR1;Class=23H-RNA	TRUE
I	678803	678825	12	+	ID=AGGATCAGAACATCAGGAAGAGC;Hits=41;Alias=Unknown_IR1;Class=23H-RNA	TRUE
I	678869	678891	31	+	ID=CCCTTACGATCCTTCTTATCTGA;Hits=57;Alias=Unknown_IR1;Class=23H-RNA	TRUE
I	678870	678891	7	+	ID=CCTTACGATCCTTCTTATCTGA;Hits=57;Alias=Unknown_IR1;Class=23H-RNA	TRUE
I	678978	679000	22	-	ID=TCTTCCTGATGTTCTGATCCTTC;Hits=40;Alias=Unknown_IR1;Class=23H-RNA	TRUE
I	678980	679002	12	+	ID=AGGATCAGAACATCAGGAAGAGC;Hits=41;Alias=Unknown_IR1;Class=23H-RNA	TRUE
I	678993	679015	16	-	ID=AAAGGATCACGAGGCTCTTCCTG;Hits=41;Alias=Unknown_IR1;Class=23H-RNA	TRUE
I	678995	679017	14	-	ID=CCAAAGGATCACGAGGCTCTTCC;Hits=41;Alias=Unknown_IR1;Class=23H-RNA	TRUE
I	678996	679017	12	-	ID=CCAAAGGATCACGAGGCTCTTC;Hits=41;Alias=Unknown_IR1;Class=23H-RNA	TRUE
I	678997	679017	10	+	ID=AAGAGCCTCGTGATCCTTTGG;Hits=41;Alias=Unknown_IR1;Class=23H-RNA	TRUE
I	678997	679019	6	+	ID=AAGAGCCTCGTGATCCTTTGGAG;Hits=39;Alias=Unknown_IR1;Class=23H-RNA	TRUE
I	679046	679068	31	+	ID=CCCTTACGATCCTTCTTATCTGA;Hits=57;Alias=Unknown_IR1;Class=23H-RNA	TRUE
I	679047	679068	7	+	ID=CCTTACGATCCTTCTTATCTGA;Hits=57;Alias=Unknown_IR1;Class=23H-RNA	TRUE
I	679724	679746	13	-	ID=AGCGAAAACTACAGTAATTCTTT;Hits=342;Alias=CELE1;Class=23H-RNA	TRUE
I	679725	679746	7	-	ID=AGCGAAAACTACAGTAATTCTT;Hits=384;Alias=CELE1;Class=23H-RNA	TRUE
I	679725	679747	35	-	ID=TAGCGAAAACTACAGTAATTCTT;Hits=331;Alias=CELE1;Class=23H-RNA	TRUE
I	694798	694819	78	+	ID=TCCCGCATTTTTTGTAGATCAA;Hits=1072;Alias=CELE14B;Class=23H-RNA	TRUE
I	694801	694822	6	+	ID=CGCATTTTTTGTAGATCAACGT;Hits=155;Alias=CELE14B;Class=23H-RNA	TRUE
I	702023	702046	23	-	ID=TGATCTACAAAAAATGCGGGAATT;Hits=693;Alias=CELE14B;Class=23H-RNA	TRUE
I	702024	702046	76	-	ID=TGATCTACAAAAAATGCGGGAAT;Hits=762;Alias=CELE14B;Class=23H-RNA	TRUE
I	702025	702045	5	+	ID=TTCCCGCATTTTTTGTAGATC;Hits=922;Alias=CELE14B;Class=23H-RNA	TRUE
I	702025	702046	15	+	ID=TTCCCGCATTTTTTGTAGATCA;Hits=857;Alias=CELE14B;Class=23H-RNA	TRUE
I	702026	702047	78	+	ID=TCCCGCATTTTTTGTAGATCAA;Hits=1072;Alias=CELE14B;Class=23H-RNA	TRUE
I	702026	702048	171	+	ID=TCCCGCATTTTTTGTAGATCAAA;Hits=830;Alias=CELE14B;Class=23H-RNA	TRUE
I	702027	702048	25	-	ID=TTTGATCTACAAAAAATGCGGG;Hits=878;Alias=CELE14B;Class=23H-RNA	TRUE
I	702028	702048	27	+	ID=CCGCATTTTTTGTAGATCAAA;Hits=974;Alias=CELE14B;Class=23H-RNA	TRUE
I	702096	702119	11	+	ID=TACGGTTTGATCTACAAAAAATGC;Hits=344;Alias=CELE14B;Class=23H-RNA	TRUE
I	702098	702120	53	-	ID=CGCATTTTTTGTAGATCAAACCG;Hits=649;Alias=CELE14B;Class=23H-RNA	TRUE
I	702099	702120	6	-	ID=CGCATTTTTTGTAGATCAAACC;Hits=732;Alias=CELE14B;Class=23H-RNA	TRUE
I	702099	702121	27	-	ID=CCGCATTTTTTGTAGATCAAACC;Hits=693;Alias=CELE14B;Class=23H-RNA	TRUE
I	702101	702121	27	-	ID=CCGCATTTTTTGTAGATCAAA;Hits=974;Alias=CELE14B;Class=23H-RNA	TRUE
I	702101	702122	25	+	ID=TTTGATCTACAAAAAATGCGGG;Hits=878;Alias=CELE14B;Class=23H-RNA	TRUE
I	702101	702123	171	-	ID=TCCCGCATTTTTTGTAGATCAAA;Hits=830;Alias=CELE14B;Class=23H-RNA	TRUE
I	702102	702123	78	-	ID=TCCCGCATTTTTTGTAGATCAA;Hits=1072;Alias=CELE14B;Class=23H-RNA	TRUE
I	702103	702124	15	-	ID=TTCCCGCATTTTTTGTAGATCA;Hits=857;Alias=CELE14B;Class=23H-RNA	TRUE
I	702103	702125	76	+	ID=TGATCTACAAAAAATGCGGGAAT;Hits=762;Alias=CELE14B;Class=23H-RNA	TRUE
I	702103	702126	23	+	ID=TGATCTACAAAAAATGCGGGAATT;Hits=693;Alias=CELE14B;Class=23H-RNA	TRUE
I	702104	702124	5	-	ID=TTCCCGCATTTTTTGTAGATC;Hits=922;Alias=CELE14B;Class=23H-RNA	TRUE
I	704179	704202	23	-	ID=TGATCTACAAAAAATGCGGGAATT;Hits=693;Alias=CELE14B;Class=23H-RNA	TRUE
I	704180	704202	76	-	ID=TGATCTACAAAAAATGCGGGAAT;Hits=762;Alias=CELE14B;Class=23H-RNA	TRUE
I	704181	704201	5	+	ID=TTCCCGCATTTTTTGTAGATC;Hits=922;Alias=CELE14B;Class=23H-RNA	TRUE
I	704181	704202	15	+	ID=TTCCCGCATTTTTTGTAGATCA;Hits=857;Alias=CELE14B;Class=23H-RNA	TRUE
I	704182	704203	78	+	ID=TCCCGCATTTTTTGTAGATCAA;Hits=1072;Alias=CELE14B;Class=23H-RNA	TRUE
I	704182	704204	171	+	ID=TCCCGCATTTTTTGTAGATCAAA;Hits=830;Alias=CELE14B;Class=23H-RNA	TRUE
I	704183	704204	25	-	ID=TTTGATCTACAAAAAATGCGGG;Hits=878;Alias=CELE14B;Class=23H-RNA	TRUE
I	704184	704204	27	+	ID=CCGCATTTTTTGTAGATCAAA;Hits=974;Alias=CELE14B;Class=23H-RNA	TRUE
I	704184	704206	27	+	ID=CCGCATTTTTTGTAGATCAAACC;Hits=693;Alias=CELE14B;Class=23H-RNA	TRUE
I	704185	704206	6	+	ID=CGCATTTTTTGTAGATCAAACC;Hits=732;Alias=CELE14B;Class=23H-RNA	TRUE
I	704185	704207	53	+	ID=CGCATTTTTTGTAGATCAAACCG;Hits=649;Alias=CELE14B;Class=23H-RNA	TRUE
I	704186	704209	11	-	ID=TACGGTTTGATCTACAAAAAATGC;Hits=344;Alias=CELE14B;Class=23H-RNA	TRUE
I	705318	705339	8	-	ID=TACGTCACAACTGTATTAAAAT;Hits=30;Alias=TC8;Class=23H-RNA	TRUE
I	707206	707228	13	-	ID=AGCGAAAACTACAGTAATTCTTT;Hits=342;Alias=CELE1;Class=23H-RNA	TRUE
I	707207	707228	7	-	ID=AGCGAAAACTACAGTAATTCTT;Hits=384;Alias=CELE1;Class=23H-RNA	TRUE
I	707207	707229	35	-	ID=TAGCGAAAACTACAGTAATTCTT;Hits=331;Alias=CELE1;Class=23H-RNA	TRUE
I	724782	724802	27	-	ID=CCGCATTTTTTGTAGATCAAA;Hits=974;Alias=CELE14B;Class=23H-RNA	TRUE
I	724782	724804	171	-	ID=TCCCGCATTTTTTGTAGATCAAA;Hits=830;Alias=CELE14B;Class=23H-RNA	TRUE
I	724824	724844	27	-	ID=CCGCATTTTTTGTAGATCAAA;Hits=974;Alias=CELE14B;Class=23H-RNA	TRUE
I	724824	724846	171	-	ID=TCCCGCATTTTTTGTAGATCAAA;Hits=830;Alias=CELE14B;Class=23H-RNA	TRUE
I	724825	724846	78	-	ID=TCCCGCATTTTTTGTAGATCAA;Hits=1072;Alias=CELE14B;Class=23H-RNA	TRUE
I	724826	724847	15	-	ID=TTCCCGCATTTTTTGTAGATCA;Hits=857;Alias=CELE14B;Class=23H-RNA	TRUE
I	724826	724848	76	+	ID=TGATCTACAAAAAATGCGGGAAT;Hits=762;Alias=CELE14B;Class=23H-RNA	TRUE
I	724826	724849	23	+	ID=TGATCTACAAAAAATGCGGGAATT;Hits=693;Alias=CELE14B;Class=23H-RNA	TRUE
I	724827	724847	5	-	ID=TTCCCGCATTTTTTGTAGATC;Hits=922;Alias=CELE14B;Class=23H-RNA	TRUE
I	724866	724886	27	-	ID=CCGCATTTTTTGTAGATCAAA;Hits=974;Alias=CELE14B;Class=23H-RNA	TRUE
I	724866	724888	171	-	ID=TCCCGCATTTTTTGTAGATCAAA;Hits=830;Alias=CELE14B;Class=23H-RNA	TRUE
I	724867	724888	78	-	ID=TCCCGCATTTTTTGTAGATCAA;Hits=1072;Alias=CELE14B;Class=23H-RNA	TRUE
I	724868	724889	15	-	ID=TTCCCGCATTTTTTGTAGATCA;Hits=857;Alias=CELE14B;Class=23H-RNA	TRUE
I	724868	724890	76	+	ID=TGATCTACAAAAAATGCGGGAAT;Hits=762;Alias=CELE14B;Class=23H-RNA	TRUE
I	724868	724891	23	+	ID=TGATCTACAAAAAATGCGGGAATT;Hits=693;Alias=CELE14B;Class=23H-RNA	TRUE
I	724869	724889	5	-	ID=TTCCCGCATTTTTTGTAGATC;Hits=922;Alias=CELE14B;Class=23H-RNA	TRUE
I	724908	724928	27	-	ID=CCGCATTTTTTGTAGATCAAA;Hits=974;Alias=CELE14B;Class=23H-RNA	TRUE
I	724908	724930	171	-	ID=TCCCGCATTTTTTGTAGATCAAA;Hits=830;Alias=CELE14B;Class=23H-RNA	TRUE
I	724909	724930	78	-	ID=TCCCGCATTTTTTGTAGATCAA;Hits=1072;Alias=CELE14B;Class=23H-RNA	TRUE
I	724910	724931	15	-	ID=TTCCCGCATTTTTTGTAGATCA;Hits=857;Alias=CELE14B;Class=23H-RNA	TRUE
I	724910	724932	76	+	ID=TGATCTACAAAAAATGCGGGAAT;Hits=762;Alias=CELE14B;Class=23H-RNA	TRUE
I	724910	724933	23	+	ID=TGATCTACAAAAAATGCGGGAATT;Hits=693;Alias=CELE14B;Class=23H-RNA	TRUE
I	724911	724931	5	-	ID=TTCCCGCATTTTTTGTAGATC;Hits=922;Alias=CELE14B;Class=23H-RNA	TRUE
I	724950	724970	27	-	ID=CCGCATTTTTTGTAGATCAAA;Hits=974;Alias=CELE14B;Class=23H-RNA	TRUE
I	724950	724972	171	-	ID=TCCCGCATTTTTTGTAGATCAAA;Hits=830;Alias=CELE14B;Class=23H-RNA	TRUE
I	724951	724972	78	-	ID=TCCCGCATTTTTTGTAGATCAA;Hits=1072;Alias=CELE14B;Class=23H-RNA	TRUE
I	724952	724973	15	-	ID=TTCCCGCATTTTTTGTAGATCA;Hits=857;Alias=CELE14B;Class=23H-RNA	TRUE
I	724952	724974	76	+	ID=TGATCTACAAAAAATGCGGGAAT;Hits=762;Alias=CELE14B;Class=23H-RNA	TRUE
I	724952	724975	23	+	ID=TGATCTACAAAAAATGCGGGAATT;Hits=693;Alias=CELE14B;Class=23H-RNA	TRUE
I	724953	724973	5	-	ID=TTCCCGCATTTTTTGTAGATC;Hits=922;Alias=CELE14B;Class=23H-RNA	TRUE
I	730752	730774	76	-	ID=TGATCTACAAAAAATGCGGGAAT;Hits=762;Alias=CELE14B;Class=23H-RNA	TRUE
I	730753	730773	5	+	ID=TTCCCGCATTTTTTGTAGATC;Hits=922;Alias=CELE14B;Class=23H-RNA	TRUE
I	730753	730774	15	+	ID=TTCCCGCATTTTTTGTAGATCA;Hits=857;Alias=CELE14B;Class=23H-RNA	TRUE
I	730754	730775	78	+	ID=TCCCGCATTTTTTGTAGATCAA;Hits=1072;Alias=CELE14B;Class=23H-RNA	TRUE
I	738110	738133	23	-	ID=TGATCTACAAAAAATGCGGGAATT;Hits=693;Alias=CELE14B;Class=23H-RNA	TRUE
I	738111	738133	76	-	ID=TGATCTACAAAAAATGCGGGAAT;Hits=762;Alias=CELE14B;Class=23H-RNA	TRUE
I	738112	738132	5	+	ID=TTCCCGCATTTTTTGTAGATC;Hits=922;Alias=CELE14B;Class=23H-RNA	TRUE
I	738112	738133	15	+	ID=TTCCCGCATTTTTTGTAGATCA;Hits=857;Alias=CELE14B;Class=23H-RNA	TRUE
I	738113	738134	78	+	ID=TCCCGCATTTTTTGTAGATCAA;Hits=1072;Alias=CELE14B;Class=23H-RNA	TRUE
I	738113	738135	171	+	ID=TCCCGCATTTTTTGTAGATCAAA;Hits=830;Alias=CELE14B;Class=23H-RNA	TRUE
I	738114	738135	25	-	ID=TTTGATCTACAAAAAATGCGGG;Hits=878;Alias=CELE14B;Class=23H-RNA	TRUE
I	738115	738135	27	+	ID=CCGCATTTTTTGTAGATCAAA;Hits=974;Alias=CELE14B;Class=23H-RNA	TRUE
I	738115	738137	27	+	ID=CCGCATTTTTTGTAGATCAAACC;Hits=693;Alias=CELE14B;Class=23H-RNA	TRUE
I	738116	738137	6	+	ID=CGCATTTTTTGTAGATCAAACC;Hits=732;Alias=CELE14B;Class=23H-RNA	TRUE
I	738116	738138	53	+	ID=CGCATTTTTTGTAGATCAAACCG;Hits=649;Alias=CELE14B;Class=23H-RNA	TRUE
I	738117	738140	11	-	ID=TACGGTTTGATCTACAAAAAATGC;Hits=344;Alias=CELE14B;Class=23H-RNA	TRUE
I	738537	738560	23	-	ID=TGATCTACAAAAAATGCGGGAATT;Hits=693;Alias=CELE14B;Class=23H-RNA	TRUE
I	738538	738560	76	-	ID=TGATCTACAAAAAATGCGGGAAT;Hits=762;Alias=CELE14B;Class=23H-RNA	TRUE
I	738539	738559	5	+	ID=TTCCCGCATTTTTTGTAGATC;Hits=922;Alias=CELE14B;Class=23H-RNA	TRUE
I	738539	738560	15	+	ID=TTCCCGCATTTTTTGTAGATCA;Hits=857;Alias=CELE14B;Class=23H-RNA	TRUE
I	738540	738561	78	+	ID=TCCCGCATTTTTTGTAGATCAA;Hits=1072;Alias=CELE14B;Class=23H-RNA	TRUE
I	738540	738562	171	+	ID=TCCCGCATTTTTTGTAGATCAAA;Hits=830;Alias=CELE14B;Class=23H-RNA	TRUE
I	738541	738562	25	-	ID=TTTGATCTACAAAAAATGCGGG;Hits=878;Alias=CELE14B;Class=23H-RNA	TRUE
I	738542	738562	27	+	ID=CCGCATTTTTTGTAGATCAAA;Hits=974;Alias=CELE14B;Class=23H-RNA	TRUE
I	738542	738564	27	+	ID=CCGCATTTTTTGTAGATCAAACC;Hits=693;Alias=CELE14B;Class=23H-RNA	TRUE
I	738543	738564	6	+	ID=CGCATTTTTTGTAGATCAAACC;Hits=732;Alias=CELE14B;Class=23H-RNA	TRUE
I	738543	738565	53	+	ID=CGCATTTTTTGTAGATCAAACCG;Hits=649;Alias=CELE14B;Class=23H-RNA	TRUE
I	743700	743722	54	-	ID=ATCGACACAAGCGCTACAGTAGT;Hits=211;Alias=CELE1;Class=23H-RNA	TRUE
I	743701	743722	12	-	ID=ATCGACACAAGCGCTACAGTAG;Hits=228;Alias=CELE1;Class=23H-RNA	TRUE
I	743702	743723	15	+	ID=TACTGTAGCGCTTGTGTCGATT;Hits=262;Alias=CELE1;Class=23H-RNA	TRUE
I	743702	743724	14	+	ID=TACTGTAGCGCTTGTGTCGATTT;Hits=253;Alias=CELE1;Class=23H-RNA	TRUE
I	745022	745043	78	+	ID=TCCCGCATTTTTTGTAGATCAA;Hits=1072;Alias=CELE14B;Class=23H-RNA	TRUE
I	745022	745044	171	+	ID=TCCCGCATTTTTTGTAGATCAAA;Hits=830;Alias=CELE14B;Class=23H-RNA	TRUE
I	745023	745044	25	-	ID=TTTGATCTACAAAAAATGCGGG;Hits=878;Alias=CELE14B;Class=23H-RNA	TRUE
I	745024	745044	27	+	ID=CCGCATTTTTTGTAGATCAAA;Hits=974;Alias=CELE14B;Class=23H-RNA	TRUE
I	745024	745046	27	+	ID=CCGCATTTTTTGTAGATCAAACC;Hits=693;Alias=CELE14B;Class=23H-RNA	TRUE
I	745025	745046	6	+	ID=CGCATTTTTTGTAGATCAAACC;Hits=732;Alias=CELE14B;Class=23H-RNA	TRUE
I	745025	745047	53	+	ID=CGCATTTTTTGTAGATCAAACCG;Hits=649;Alias=CELE14B;Class=23H-RNA	TRUE
I	750348	750369	101	+	ID=TCCCGCATTTTTGTAGATCACA;Hits=11;Alias=CELE14B;Class=23H-RNA	TRUE
I	753996	754019	23	-	ID=TGATCTACAAAAAATGCGGGAATT;Hits=693;Alias=CELE14B;Class=23H-RNA	TRUE
I	753997	754019	76	-	ID=TGATCTACAAAAAATGCGGGAAT;Hits=762;Alias=CELE14B;Class=23H-RNA	TRUE
I	753998	754018	5	+	ID=TTCCCGCATTTTTTGTAGATC;Hits=922;Alias=CELE14B;Class=23H-RNA	TRUE
I	753998	754019	15	+	ID=TTCCCGCATTTTTTGTAGATCA;Hits=857;Alias=CELE14B;Class=23H-RNA	TRUE
I	753999	754020	78	+	ID=TCCCGCATTTTTTGTAGATCAA;Hits=1072;Alias=CELE14B;Class=23H-RNA	TRUE
I	753999	754021	171	+	ID=TCCCGCATTTTTTGTAGATCAAA;Hits=830;Alias=CELE14B;Class=23H-RNA	TRUE
I	754000	754021	25	-	ID=TTTGATCTACAAAAAATGCGGG;Hits=878;Alias=CELE14B;Class=23H-RNA	TRUE
I	754001	754021	27	+	ID=CCGCATTTTTTGTAGATCAAA;Hits=974;Alias=CELE14B;Class=23H-RNA	TRUE
I	754001	754023	27	+	ID=CCGCATTTTTTGTAGATCAAACC;Hits=693;Alias=CELE14B;Class=23H-RNA	TRUE
I	754002	754023	6	+	ID=CGCATTTTTTGTAGATCAAACC;Hits=732;Alias=CELE14B;Class=23H-RNA	TRUE
I	754002	754024	9	+	ID=CGCATTTTTTGTAGATCAAACCC;Hits=11;Alias=CELE14B;Class=23H-RNA	TRUE
I	754298	754319	78	-	ID=TCCCGCATTTTTTGTAGATCAA;Hits=1072;Alias=CELE14B;Class=23H-RNA	TRUE
I	754299	754320	15	-	ID=TTCCCGCATTTTTTGTAGATCA;Hits=857;Alias=CELE14B;Class=23H-RNA	TRUE
I	754299	754321	76	+	ID=TGATCTACAAAAAATGCGGGAAT;Hits=762;Alias=CELE14B;Class=23H-RNA	TRUE
I	754300	754320	5	-	ID=TTCCCGCATTTTTTGTAGATC;Hits=922;Alias=CELE14B;Class=23H-RNA	TRUE
I	756202	756223	6	-	ID=CGCATTTTTTGTAGATCAAACC;Hits=732;Alias=CELE14B;Class=23H-RNA	TRUE
I	756202	756224	27	-	ID=CCGCATTTTTTGTAGATCAAACC;Hits=693;Alias=CELE14B;Class=23H-RNA	TRUE
I	756204	756224	27	-	ID=CCGCATTTTTTGTAGATCAAA;Hits=974;Alias=CELE14B;Class=23H-RNA	TRUE
I	756204	756225	25	+	ID=TTTGATCTACAAAAAATGCGGG;Hits=878;Alias=CELE14B;Class=23H-RNA	TRUE
I	756204	756226	171	-	ID=TCCCGCATTTTTTGTAGATCAAA;Hits=830;Alias=CELE14B;Class=23H-RNA	TRUE
I	759981	760002	9	+	ID=CGGCGGCCGACAATTTCCGAGT;Hits=68;Alias=Unknown_hairpin_RE2;Class=23H-RNA	TRUE
I	771721	771742	6	+	ID=CGCATTTTTTGTAGATCAAACC;Hits=732;Alias=CELE14B;Class=23H-RNA	TRUE
I	773581	773601	27	-	ID=CCGCATTTTTTGTAGATCAAA;Hits=974;Alias=CELE14B;Class=23H-RNA	TRUE
I	773581	773602	25	+	ID=TTTGATCTACAAAAAATGCGGG;Hits=878;Alias=CELE14B;Class=23H-RNA	TRUE
I	773581	773603	171	-	ID=TCCCGCATTTTTTGTAGATCAAA;Hits=830;Alias=CELE14B;Class=23H-RNA	TRUE
I	773582	773603	78	-	ID=TCCCGCATTTTTTGTAGATCAA;Hits=1072;Alias=CELE14B;Class=23H-RNA	TRUE
I	773583	773604	15	-	ID=TTCCCGCATTTTTTGTAGATCA;Hits=857;Alias=CELE14B;Class=23H-RNA	TRUE
I	773583	773605	76	+	ID=TGATCTACAAAAAATGCGGGAAT;Hits=762;Alias=CELE14B;Class=23H-RNA	TRUE
I	773583	773606	23	+	ID=TGATCTACAAAAAATGCGGGAATT;Hits=693;Alias=CELE14B;Class=23H-RNA	TRUE
I	773584	773604	5	-	ID=TTCCCGCATTTTTTGTAGATC;Hits=922;Alias=CELE14B;Class=23H-RNA	TRUE
I	779667	779688	5	-	ID=AGTTCAACAGGTAGATCAAAAA;Hits=34;Alias=TIR54TA1;Class=23H-RNA	TRUE
I	779668	779690	31	+	ID=TTTTGATCTACCTGTTGAACTTG;Hits=35;Alias=TIR54TA1;Class=23H-RNA	TRUE
I	779668	779690	9	-	ID=CAAGTTCAACAGGTAGATCAAAA;Hits=35;Alias=TIR54TA1;Class=23H-RNA	TRUE
I	779669	779690	53	+	ID=TTTGATCTACCTGTTGAACTTG;Hits=36;Alias=TIR54TA1;Class=23H-RNA	TRUE
I	779669	779690	4	-	ID=CAAGTTCAACAGGTAGATCAAA;Hits=36;Alias=TIR54TA1;Class=23H-RNA	TRUE
I	779671	779693	15	+	ID=TGATCTACCTGTTGAACTTGACC;Hits=2;Alias=other;Class=23H-RNA	TRUE
I	781887	781908	25	-	ID=TTTGATCTACAAAAAATGCGGG;Hits=878;Alias=CELE14B;Class=23H-RNA	TRUE
I	781889	781910	6	+	ID=CGCATTTTTTGTAGATCAAACC;Hits=732;Alias=CELE14B;Class=23H-RNA	TRUE
I	781889	781911	53	+	ID=CGCATTTTTTGTAGATCAAACCG;Hits=649;Alias=CELE14B;Class=23H-RNA	TRUE
I	781890	781913	11	-	ID=TACGGTTTGATCTACAAAAAATGC;Hits=344;Alias=CELE14B;Class=23H-RNA	TRUE
I	782336	782359	23	-	ID=TGATCTACAAAAAATGCGGGAATT;Hits=693;Alias=CELE14B;Class=23H-RNA	TRUE
I	782337	782359	76	-	ID=TGATCTACAAAAAATGCGGGAAT;Hits=762;Alias=CELE14B;Class=23H-RNA	TRUE
I	782338	782358	5	+	ID=TTCCCGCATTTTTTGTAGATC;Hits=922;Alias=CELE14B;Class=23H-RNA	TRUE
I	782338	782359	15	+	ID=TTCCCGCATTTTTTGTAGATCA;Hits=857;Alias=CELE14B;Class=23H-RNA	TRUE
I	782339	782360	78	+	ID=TCCCGCATTTTTTGTAGATCAA;Hits=1072;Alias=CELE14B;Class=23H-RNA	TRUE
I	782339	782361	171	+	ID=TCCCGCATTTTTTGTAGATCAAA;Hits=830;Alias=CELE14B;Class=23H-RNA	TRUE
I	782340	782361	25	-	ID=TTTGATCTACAAAAAATGCGGG;Hits=878;Alias=CELE14B;Class=23H-RNA	TRUE
I	782341	782361	27	+	ID=CCGCATTTTTTGTAGATCAAA;Hits=974;Alias=CELE14B;Class=23H-RNA	TRUE
I	782341	782363	27	+	ID=CCGCATTTTTTGTAGATCAAACC;Hits=693;Alias=CELE14B;Class=23H-RNA	TRUE
I	782342	782363	6	+	ID=CGCATTTTTTGTAGATCAAACC;Hits=732;Alias=CELE14B;Class=23H-RNA	TRUE
I	788667	788687	24	-	ID=TTAAACATAGCGGCGCGCGGA;Hits=101;Alias=PALTA3;Class=23H-RNA	TRUE
I	788667	788689	1001	+	ID=TCCGCGCGCCGCTATGTTTAACT;Hits=100;Alias=PALTA3;Class=23H-RNA	TRUE
I	788668	788689	291	+	ID=CCGCGCGCCGCTATGTTTAACT;Hits=101;Alias=PALTA3;Class=23H-RNA	TRUE
I	788669	788689	84	+	ID=CGCGCGCCGCTATGTTTAACT;Hits=102;Alias=PALTA3;Class=23H-RNA	TRUE
I	788669	788690	150	+	ID=CGCGCGCCGCTATGTTTAACTC;Hits=100;Alias=PALTA3;Class=23H-RNA	TRUE
I	788669	788691	133	+	ID=CGCGCGCCGCTATGTTTAACTCG;Hits=96;Alias=PALTA3;Class=23H-RNA	FALSE
I	788671	788692	41	+	ID=CGCGCCGCTATGTTTAACTCGC;Hits=85;Alias=PALTA3;Class=23H-RNA	TRUE
I	788671	788693	16	+	ID=CGCGCCGCTATGTTTAACTCGCA;Hits=65;Alias=PALTA3;Class=23H-RNA	TRUE
I	788726	788748	26	-	ID=TCCGCGCGCCGCTGTGTTTAACT;Hits=4;Alias=other;Class=23H-RNA	TRUE
I	788728	788750	7	+	ID=TTAAACACAGCGGCGCGCGGAAC;Hits=3;Alias=other;Class=23H-RNA	TRUE
I	793343	793363	27	-	ID=CCGCATTTTTTGTAGATCAAA;Hits=974;Alias=CELE14B;Class=23H-RNA	TRUE
I	793343	793364	25	+	ID=TTTGATCTACAAAAAATGCGGG;Hits=878;Alias=CELE14B;Class=23H-RNA	TRUE
I	793343	793365	171	-	ID=TCCCGCATTTTTTGTAGATCAAA;Hits=830;Alias=CELE14B;Class=23H-RNA	TRUE
I	793344	793365	78	-	ID=TCCCGCATTTTTTGTAGATCAA;Hits=1072;Alias=CELE14B;Class=23H-RNA	TRUE
I	799231	799253	171	+	ID=TCCCGCATTTTTTGTAGATCAAA;Hits=830;Alias=CELE14B;Class=23H-RNA	TRUE
I	799233	799253	27	+	ID=CCGCATTTTTTGTAGATCAAA;Hits=974;Alias=CELE14B;Class=23H-RNA	TRUE
I	799642	799664	53	-	ID=CGCATTTTTTGTAGATCAAACCG;Hits=649;Alias=CELE14B;Class=23H-RNA	TRUE
I	799643	799664	6	-	ID=CGCATTTTTTGTAGATCAAACC;Hits=732;Alias=CELE14B;Class=23H-RNA	TRUE
I	799643	799665	27	-	ID=CCGCATTTTTTGTAGATCAAACC;Hits=693;Alias=CELE14B;Class=23H-RNA	TRUE
I	799645	799665	27	-	ID=CCGCATTTTTTGTAGATCAAA;Hits=974;Alias=CELE14B;Class=23H-RNA	TRUE
I	799645	799666	25	+	ID=TTTGATCTACAAAAAATGCGGG;Hits=878;Alias=CELE14B;Class=23H-RNA	TRUE
I	799645	799667	171	-	ID=TCCCGCATTTTTTGTAGATCAAA;Hits=830;Alias=CELE14B;Class=23H-RNA	TRUE
I	799646	799667	78	-	ID=TCCCGCATTTTTTGTAGATCAA;Hits=1072;Alias=CELE14B;Class=23H-RNA	TRUE
I	821297	821320	23	-	ID=TGATCTACAAAAAATGCGGGAATT;Hits=693;Alias=CELE14B;Class=23H-RNA	TRUE
I	821298	821320	76	-	ID=TGATCTACAAAAAATGCGGGAAT;Hits=762;Alias=CELE14B;Class=23H-RNA	TRUE
I	821299	821319	5	+	ID=TTCCCGCATTTTTTGTAGATC;Hits=922;Alias=CELE14B;Class=23H-RNA	TRUE
I	821299	821320	15	+	ID=TTCCCGCATTTTTTGTAGATCA;Hits=857;Alias=CELE14B;Class=23H-RNA	TRUE
I	821300	821321	78	+	ID=TCCCGCATTTTTTGTAGATCAA;Hits=1072;Alias=CELE14B;Class=23H-RNA	TRUE
I	821300	821322	171	+	ID=TCCCGCATTTTTTGTAGATCAAA;Hits=830;Alias=CELE14B;Class=23H-RNA	TRUE
I	821301	821322	25	-	ID=TTTGATCTACAAAAAATGCGGG;Hits=878;Alias=CELE14B;Class=23H-RNA	TRUE
I	821302	821322	27	+	ID=CCGCATTTTTTGTAGATCAAA;Hits=974;Alias=CELE14B;Class=23H-RNA	TRUE
I	821302	821324	27	+	ID=CCGCATTTTTTGTAGATCAAACC;Hits=693;Alias=CELE14B;Class=23H-RNA	TRUE
I	821303	821324	6	+	ID=CGCATTTTTTGTAGATCAAACC;Hits=732;Alias=CELE14B;Class=23H-RNA	TRUE
I	821303	821325	53	+	ID=CGCATTTTTTGTAGATCAAACCG;Hits=649;Alias=CELE14B;Class=23H-RNA	TRUE
I	821304	821327	11	-	ID=TACGGTTTGATCTACAAAAAATGC;Hits=344;Alias=CELE14B;Class=23H-RNA	TRUE
I	823423	823446	23	-	ID=TGATCTACAAAAAATGCGGGAATT;Hits=693;Alias=CELE14B;Class=23H-RNA	TRUE
I	823424	823446	76	-	ID=TGATCTACAAAAAATGCGGGAAT;Hits=762;Alias=CELE14B;Class=23H-RNA	TRUE
I	823425	823445	5	+	ID=TTCCCGCATTTTTTGTAGATC;Hits=922;Alias=CELE14B;Class=23H-RNA	TRUE
I	823425	823446	15	+	ID=TTCCCGCATTTTTTGTAGATCA;Hits=857;Alias=CELE14B;Class=23H-RNA	TRUE
I	823426	823447	78	+	ID=TCCCGCATTTTTTGTAGATCAA;Hits=1072;Alias=CELE14B;Class=23H-RNA	TRUE
I	823426	823448	171	+	ID=TCCCGCATTTTTTGTAGATCAAA;Hits=830;Alias=CELE14B;Class=23H-RNA	TRUE
I	823427	823448	25	-	ID=TTTGATCTACAAAAAATGCGGG;Hits=878;Alias=CELE14B;Class=23H-RNA	TRUE
I	823428	823448	27	+	ID=CCGCATTTTTTGTAGATCAAA;Hits=974;Alias=CELE14B;Class=23H-RNA	TRUE
I	823428	823450	27	+	ID=CCGCATTTTTTGTAGATCAAACC;Hits=693;Alias=CELE14B;Class=23H-RNA	TRUE
I	823429	823450	6	+	ID=CGCATTTTTTGTAGATCAAACC;Hits=732;Alias=CELE14B;Class=23H-RNA	TRUE
I	823429	823451	53	+	ID=CGCATTTTTTGTAGATCAAACCG;Hits=649;Alias=CELE14B;Class=23H-RNA	TRUE
I	823430	823453	11	-	ID=TACGGTTTGATCTACAAAAAATGC;Hits=344;Alias=CELE14B;Class=23H-RNA	TRUE
I	825121	825143	53	-	ID=CGCATTTTTTGTAGATCAAACCG;Hits=649;Alias=CELE14B;Class=23H-RNA	TRUE
I	825122	825143	6	-	ID=CGCATTTTTTGTAGATCAAACC;Hits=732;Alias=CELE14B;Class=23H-RNA	TRUE
I	825122	825144	27	-	ID=CCGCATTTTTTGTAGATCAAACC;Hits=693;Alias=CELE14B;Class=23H-RNA	TRUE
I	825124	825144	27	-	ID=CCGCATTTTTTGTAGATCAAA;Hits=974;Alias=CELE14B;Class=23H-RNA	TRUE
I	825124	825145	25	+	ID=TTTGATCTACAAAAAATGCGGG;Hits=878;Alias=CELE14B;Class=23H-RNA	TRUE
I	825124	825146	171	-	ID=TCCCGCATTTTTTGTAGATCAAA;Hits=830;Alias=CELE14B;Class=23H-RNA	TRUE
I	825125	825146	78	-	ID=TCCCGCATTTTTTGTAGATCAA;Hits=1072;Alias=CELE14B;Class=23H-RNA	TRUE
I	825126	825147	15	-	ID=TTCCCGCATTTTTTGTAGATCA;Hits=857;Alias=CELE14B;Class=23H-RNA	TRUE
I	825126	825148	76	+	ID=TGATCTACAAAAAATGCGGGAAT;Hits=762;Alias=CELE14B;Class=23H-RNA	TRUE
I	825126	825149	23	+	ID=TGATCTACAAAAAATGCGGGAATT;Hits=693;Alias=CELE14B;Class=23H-RNA	TRUE
I	825127	825147	5	-	ID=TTCCCGCATTTTTTGTAGATC;Hits=922;Alias=CELE14B;Class=23H-RNA	TRUE
I	830568	830589	6	-	ID=CGCATTTTTTGTAGATCAACGT;Hits=155;Alias=CELE14B;Class=23H-RNA	TRUE
I	830672	830694	76	-	ID=TGATCTACAAAAAATGCGGGAAT;Hits=762;Alias=CELE14B;Class=23H-RNA	TRUE
I	830673	830693	5	+	ID=TTCCCGCATTTTTTGTAGATC;Hits=922;Alias=CELE14B;Class=23H-RNA	TRUE
I	830673	830694	15	+	ID=TTCCCGCATTTTTTGTAGATCA;Hits=857;Alias=CELE14B;Class=23H-RNA	TRUE
I	830674	830696	9	+	ID=TCCCGCATTTTTTGTAGATCAGA;Hits=14;Alias=CELE14B;Class=23H-RNA	TRUE
I	830675	830696	7	+	ID=CCCGCATTTTTTGTAGATCAGA;Hits=14;Alias=CELE14B;Class=23H-RNA	TRUE
I	839176	839197	6	-	ID=CGCATTTTTTGTAGATCAAACC;Hits=732;Alias=CELE14B;Class=23H-RNA	TRUE
I	839176	839198	27	-	ID=CCGCATTTTTTGTAGATCAAACC;Hits=693;Alias=CELE14B;Class=23H-RNA	TRUE
I	839178	839198	27	-	ID=CCGCATTTTTTGTAGATCAAA;Hits=974;Alias=CELE14B;Class=23H-RNA	TRUE
I	839178	839199	25	+	ID=TTTGATCTACAAAAAATGCGGG;Hits=878;Alias=CELE14B;Class=23H-RNA	TRUE
I	839178	839200	171	-	ID=TCCCGCATTTTTTGTAGATCAAA;Hits=830;Alias=CELE14B;Class=23H-RNA	TRUE
I	839179	839200	78	-	ID=TCCCGCATTTTTTGTAGATCAA;Hits=1072;Alias=CELE14B;Class=23H-RNA	TRUE
I	839180	839201	15	-	ID=TTCCCGCATTTTTTGTAGATCA;Hits=857;Alias=CELE14B;Class=23H-RNA	TRUE
I	839180	839202	76	+	ID=TGATCTACAAAAAATGCGGGAAT;Hits=762;Alias=CELE14B;Class=23H-RNA	TRUE
I	839180	839203	23	+	ID=TGATCTACAAAAAATGCGGGAATT;Hits=693;Alias=CELE14B;Class=23H-RNA	TRUE
I	839181	839201	5	-	ID=TTCCCGCATTTTTTGTAGATC;Hits=922;Alias=CELE14B;Class=23H-RNA	TRUE
I	844458	844479	6	-	ID=CGCATTTTTTGTAGATCAAACC;Hits=732;Alias=CELE14B;Class=23H-RNA	TRUE
I	844458	844480	27	-	ID=CCGCATTTTTTGTAGATCAAACC;Hits=693;Alias=CELE14B;Class=23H-RNA	TRUE
I	844460	844480	27	-	ID=CCGCATTTTTTGTAGATCAAA;Hits=974;Alias=CELE14B;Class=23H-RNA	TRUE
I	844460	844481	25	+	ID=TTTGATCTACAAAAAATGCGGG;Hits=878;Alias=CELE14B;Class=23H-RNA	TRUE
I	844460	844482	171	-	ID=TCCCGCATTTTTTGTAGATCAAA;Hits=830;Alias=CELE14B;Class=23H-RNA	TRUE
I	847119	847139	27	-	ID=CCGCATTTTTTGTAGATCAAA;Hits=974;Alias=CELE14B;Class=23H-RNA	TRUE
I	847119	847140	25	+	ID=TTTGATCTACAAAAAATGCGGG;Hits=878;Alias=CELE14B;Class=23H-RNA	TRUE
I	847119	847141	171	-	ID=TCCCGCATTTTTTGTAGATCAAA;Hits=830;Alias=CELE14B;Class=23H-RNA	TRUE
I	847120	847141	78	-	ID=TCCCGCATTTTTTGTAGATCAA;Hits=1072;Alias=CELE14B;Class=23H-RNA	TRUE
I	847121	847142	15	-	ID=TTCCCGCATTTTTTGTAGATCA;Hits=857;Alias=CELE14B;Class=23H-RNA	TRUE
I	847121	847143	76	+	ID=TGATCTACAAAAAATGCGGGAAT;Hits=762;Alias=CELE14B;Class=23H-RNA	TRUE
I	847121	847144	23	+	ID=TGATCTACAAAAAATGCGGGAATT;Hits=693;Alias=CELE14B;Class=23H-RNA	TRUE
I	847122	847142	5	-	ID=TTCCCGCATTTTTTGTAGATC;Hits=922;Alias=CELE14B;Class=23H-RNA	TRUE
I	855835	855857	7	-	ID=TCAAAATTTGACGGTGATTTCAA;Hits=92;Alias=PALTTAA1;Class=23H-RNA	TRUE
I	859651	859673	7	-	ID=TCAAAATTTGACGGTGATTTCAA;Hits=92;Alias=PALTTAA1;Class=23H-RNA	TRUE
I	860065	860087	7	+	ID=TCAAAATTTGACGGTGATTTCAA;Hits=92;Alias=PALTTAA1;Class=23H-RNA	TRUE
I	869519	869541	7	-	ID=TCAAAATTTGACGGTGATTTCAA;Hits=92;Alias=PALTTAA1;Class=23H-RNA	TRUE
I	869933	869955	7	+	ID=TCAAAATTTGACGGTGATTTCAA;Hits=92;Alias=PALTTAA1;Class=23H-RNA	TRUE
I	874584	874605	6	+	ID=CGCATTTTTTGTAGATCAACGT;Hits=155;Alias=CELE14B;Class=23H-RNA	TRUE
I	877972	877995	11	+	ID=TACGGTTTGATCTACAAAAAATGC;Hits=344;Alias=CELE14B;Class=23H-RNA	TRUE
I	877974	877996	53	-	ID=CGCATTTTTTGTAGATCAAACCG;Hits=649;Alias=CELE14B;Class=23H-RNA	TRUE
I	877975	877996	6	-	ID=CGCATTTTTTGTAGATCAAACC;Hits=732;Alias=CELE14B;Class=23H-RNA	TRUE
I	877975	877997	27	-	ID=CCGCATTTTTTGTAGATCAAACC;Hits=693;Alias=CELE14B;Class=23H-RNA	TRUE
I	877977	877997	27	-	ID=CCGCATTTTTTGTAGATCAAA;Hits=974;Alias=CELE14B;Class=23H-RNA	TRUE
I	877977	877998	25	+	ID=TTTGATCTACAAAAAATGCGGG;Hits=878;Alias=CELE14B;Class=23H-RNA	TRUE
I	877977	877999	171	-	ID=TCCCGCATTTTTTGTAGATCAAA;Hits=830;Alias=CELE14B;Class=23H-RNA	TRUE
I	877978	877999	78	-	ID=TCCCGCATTTTTTGTAGATCAA;Hits=1072;Alias=CELE14B;Class=23H-RNA	TRUE
I	877979	878000	15	-	ID=TTCCCGCATTTTTTGTAGATCA;Hits=857;Alias=CELE14B;Class=23H-RNA	TRUE
I	877979	878001	76	+	ID=TGATCTACAAAAAATGCGGGAAT;Hits=762;Alias=CELE14B;Class=23H-RNA	TRUE
I	877979	878002	23	+	ID=TGATCTACAAAAAATGCGGGAATT;Hits=693;Alias=CELE14B;Class=23H-RNA	TRUE
I	877980	878000	5	-	ID=TTCCCGCATTTTTTGTAGATC;Hits=922;Alias=CELE14B;Class=23H-RNA	TRUE
I	883557	883579	5	-	ID=TCCCGCATTTTTTGTAGATCACA;Hits=48;Alias=CELE14B;Class=23H-RNA	TRUE
I	883559	883580	15	-	ID=TTCCCGCATTTTTTGTAGATCA;Hits=857;Alias=CELE14B;Class=23H-RNA	TRUE
I	883559	883581	76	+	ID=TGATCTACAAAAAATGCGGGAAT;Hits=762;Alias=CELE14B;Class=23H-RNA	TRUE
I	883560	883580	5	-	ID=TTCCCGCATTTTTTGTAGATC;Hits=922;Alias=CELE14B;Class=23H-RNA	TRUE
I	888526	888549	23	-	ID=TGATCTACAAAAAATGCGGGAATT;Hits=693;Alias=CELE14B;Class=23H-RNA	TRUE
I	888527	888549	76	-	ID=TGATCTACAAAAAATGCGGGAAT;Hits=762;Alias=CELE14B;Class=23H-RNA	TRUE
I	888528	888548	5	+	ID=TTCCCGCATTTTTTGTAGATC;Hits=922;Alias=CELE14B;Class=23H-RNA	TRUE
I	888528	888549	15	+	ID=TTCCCGCATTTTTTGTAGATCA;Hits=857;Alias=CELE14B;Class=23H-RNA	TRUE
I	888529	888550	78	+	ID=TCCCGCATTTTTTGTAGATCAA;Hits=1072;Alias=CELE14B;Class=23H-RNA	TRUE
I	888529	888551	171	+	ID=TCCCGCATTTTTTGTAGATCAAA;Hits=830;Alias=CELE14B;Class=23H-RNA	TRUE
I	888531	888551	27	+	ID=CCGCATTTTTTGTAGATCAAA;Hits=974;Alias=CELE14B;Class=23H-RNA	TRUE
I	902032	902054	4	-	ID=CACGGTGCCAGATCCTGAAAACG;Hits=22;Alias=other;Class=23H-RNA	TRUE
I	904881	904902	13	+	ID=TCACGAGGGACGAGGAAAAGTG;Hits=316;Alias=PAL5A;Class=23H-RNA	TRUE
I	905190	905212	36	-	ID=AGCGGTCTCGTTATGAAAATCAG;Hits=351;Alias=PAL5A;Class=23H-RNA	TRUE
I	905192	905214	22	-	ID=TCAGCGGTCTCGTTATGAAAATC;Hits=354;Alias=PAL5A;Class=23H-RNA	TRUE
I	905305	905327	22	+	ID=TCAGCGGTCTCGTTATGAAAATC;Hits=354;Alias=PAL5A;Class=23H-RNA	TRUE
I	905307	905329	36	+	ID=AGCGGTCTCGTTATGAAAATCAG;Hits=351;Alias=PAL5A;Class=23H-RNA	TRUE
I	905310	905332	11	-	ID=TACCTGATTTTCATAACGAGACC;Hits=346;Alias=PAL5A;Class=23H-RNA	TRUE
I	905617	905638	13	-	ID=TCACGAGGGACGAGGAAAAGTG;Hits=316;Alias=PAL5A;Class=23H-RNA	TRUE
I	907154	907175	6	+	ID=CGCATTTTTTGTAGATCAACGT;Hits=155;Alias=CELE14B;Class=23H-RNA	TRUE
I	911242	911263	6	-	ID=CGCATTTTTTGTAGATCAACGT;Hits=155;Alias=CELE14B;Class=23H-RNA	TRUE
I	911245	911266	78	-	ID=TCCCGCATTTTTTGTAGATCAA;Hits=1072;Alias=CELE14B;Class=23H-RNA	TRUE
I	912071	912094	23	-	ID=TGATCTACAAAAAATGCGGGAATT;Hits=693;Alias=CELE14B;Class=23H-RNA	TRUE
I	912072	912094	76	-	ID=TGATCTACAAAAAATGCGGGAAT;Hits=762;Alias=CELE14B;Class=23H-RNA	TRUE
I	912073	912093	5	+	ID=TTCCCGCATTTTTTGTAGATC;Hits=922;Alias=CELE14B;Class=23H-RNA	TRUE
I	912073	912094	15	+	ID=TTCCCGCATTTTTTGTAGATCA;Hits=857;Alias=CELE14B;Class=23H-RNA	TRUE
I	912074	912095	78	+	ID=TCCCGCATTTTTTGTAGATCAA;Hits=1072;Alias=CELE14B;Class=23H-RNA	TRUE
I	912074	912096	171	+	ID=TCCCGCATTTTTTGTAGATCAAA;Hits=830;Alias=CELE14B;Class=23H-RNA	TRUE
I	912075	912096	25	-	ID=TTTGATCTACAAAAAATGCGGG;Hits=878;Alias=CELE14B;Class=23H-RNA	TRUE
I	912076	912096	27	+	ID=CCGCATTTTTTGTAGATCAAA;Hits=974;Alias=CELE14B;Class=23H-RNA	TRUE
I	912076	912098	27	+	ID=CCGCATTTTTTGTAGATCAAACC;Hits=693;Alias=CELE14B;Class=23H-RNA	TRUE
I	912077	912098	6	+	ID=CGCATTTTTTGTAGATCAAACC;Hits=732;Alias=CELE14B;Class=23H-RNA	TRUE
I	912077	912099	53	+	ID=CGCATTTTTTGTAGATCAAACCG;Hits=649;Alias=CELE14B;Class=23H-RNA	TRUE
I	922199	922220	6	+	ID=CGCATTTTTTGTAGATCAACGT;Hits=155;Alias=CELE14B;Class=23H-RNA	TRUE
I	922269	922291	53	-	ID=CGCATTTTTTGTAGATCAAACCG;Hits=649;Alias=CELE14B;Class=23H-RNA	TRUE
I	922270	922291	6	-	ID=CGCATTTTTTGTAGATCAAACC;Hits=732;Alias=CELE14B;Class=23H-RNA	TRUE
I	922270	922292	27	-	ID=CCGCATTTTTTGTAGATCAAACC;Hits=693;Alias=CELE14B;Class=23H-RNA	TRUE
I	922272	922292	27	-	ID=CCGCATTTTTTGTAGATCAAA;Hits=974;Alias=CELE14B;Class=23H-RNA	TRUE
I	922272	922293	25	+	ID=TTTGATCTACAAAAAATGCGGG;Hits=878;Alias=CELE14B;Class=23H-RNA	TRUE
I	922272	922294	171	-	ID=TCCCGCATTTTTTGTAGATCAAA;Hits=830;Alias=CELE14B;Class=23H-RNA	TRUE
I	922273	922294	78	-	ID=TCCCGCATTTTTTGTAGATCAA;Hits=1072;Alias=CELE14B;Class=23H-RNA	TRUE
I	922274	922296	14	+	ID=TGATCTACAAAAAATGCGGGAAC;Hits=29;Alias=CELE14B;Class=23H-RNA	TRUE
I	922369	922391	171	+	ID=TCCCGCATTTTTTGTAGATCAAA;Hits=830;Alias=CELE14B;Class=23H-RNA	TRUE
I	922371	922391	27	+	ID=CCGCATTTTTTGTAGATCAAA;Hits=974;Alias=CELE14B;Class=23H-RNA	TRUE
I	925723	925743	27	-	ID=CCGCATTTTTTGTAGATCAAA;Hits=974;Alias=CELE14B;Class=23H-RNA	TRUE
I	925723	925745	171	-	ID=TCCCGCATTTTTTGTAGATCAAA;Hits=830;Alias=CELE14B;Class=23H-RNA	TRUE
I	937023	937044	78	-	ID=TCCCGCATTTTTTGTAGATCAA;Hits=1072;Alias=CELE14B;Class=23H-RNA	TRUE
I	937024	937045	15	-	ID=TTCCCGCATTTTTTGTAGATCA;Hits=857;Alias=CELE14B;Class=23H-RNA	TRUE
I	937024	937046	76	+	ID=TGATCTACAAAAAATGCGGGAAT;Hits=762;Alias=CELE14B;Class=23H-RNA	TRUE
I	937198	937220	76	-	ID=TGATCTACAAAAAATGCGGGAAT;Hits=762;Alias=CELE14B;Class=23H-RNA	TRUE
I	937199	937219	5	+	ID=TTCCCGCATTTTTTGTAGATC;Hits=922;Alias=CELE14B;Class=23H-RNA	TRUE
I	937199	937220	15	+	ID=TTCCCGCATTTTTTGTAGATCA;Hits=857;Alias=CELE14B;Class=23H-RNA	TRUE
I	937200	937221	78	+	ID=TCCCGCATTTTTTGTAGATCAA;Hits=1072;Alias=CELE14B;Class=23H-RNA	TRUE
I	938109	938132	23	-	ID=TGATCTACAAAAAATGCGGGAATT;Hits=693;Alias=CELE14B;Class=23H-RNA	TRUE
I	938110	938132	76	-	ID=TGATCTACAAAAAATGCGGGAAT;Hits=762;Alias=CELE14B;Class=23H-RNA	TRUE
I	938111	938131	5	+	ID=TTCCCGCATTTTTTGTAGATC;Hits=922;Alias=CELE14B;Class=23H-RNA	TRUE
I	938111	938132	15	+	ID=TTCCCGCATTTTTTGTAGATCA;Hits=857;Alias=CELE14B;Class=23H-RNA	TRUE
I	938112	938133	78	+	ID=TCCCGCATTTTTTGTAGATCAA;Hits=1072;Alias=CELE14B;Class=23H-RNA	TRUE
I	938112	938134	171	+	ID=TCCCGCATTTTTTGTAGATCAAA;Hits=830;Alias=CELE14B;Class=23H-RNA	TRUE
I	938113	938134	25	-	ID=TTTGATCTACAAAAAATGCGGG;Hits=878;Alias=CELE14B;Class=23H-RNA	TRUE
I	938114	938134	27	+	ID=CCGCATTTTTTGTAGATCAAA;Hits=974;Alias=CELE14B;Class=23H-RNA	TRUE
I	938114	938136	27	+	ID=CCGCATTTTTTGTAGATCAAACC;Hits=693;Alias=CELE14B;Class=23H-RNA	TRUE
I	938115	938136	6	+	ID=CGCATTTTTTGTAGATCAAACC;Hits=732;Alias=CELE14B;Class=23H-RNA	TRUE
I	938115	938137	53	+	ID=CGCATTTTTTGTAGATCAAACCG;Hits=649;Alias=CELE14B;Class=23H-RNA	TRUE
I	938116	938139	11	-	ID=TACGGTTTGATCTACAAAAAATGC;Hits=344;Alias=CELE14B;Class=23H-RNA	TRUE
I	941860	941881	6	-	ID=CGCATTTTTTGTAGATCAACGT;Hits=155;Alias=CELE14B;Class=23H-RNA	TRUE
I	947814	947836	54	-	ID=ATCGACACAAGCGCTACAGTAGT;Hits=211;Alias=CELE1;Class=23H-RNA	TRUE
I	947815	947836	12	-	ID=ATCGACACAAGCGCTACAGTAG;Hits=228;Alias=CELE1;Class=23H-RNA	TRUE
I	947816	947837	15	+	ID=TACTGTAGCGCTTGTGTCGATT;Hits=262;Alias=CELE1;Class=23H-RNA	TRUE
I	947816	947838	14	+	ID=TACTGTAGCGCTTGTGTCGATTT;Hits=253;Alias=CELE1;Class=23H-RNA	TRUE
I	947969	947991	54	-	ID=ATCGACACAAGCGCTACAGTAGT;Hits=211;Alias=CELE1;Class=23H-RNA	TRUE
I	947970	947991	12	-	ID=ATCGACACAAGCGCTACAGTAG;Hits=228;Alias=CELE1;Class=23H-RNA	TRUE
I	947971	947992	15	+	ID=TACTGTAGCGCTTGTGTCGATT;Hits=262;Alias=CELE1;Class=23H-RNA	TRUE
I	947971	947993	14	+	ID=TACTGTAGCGCTTGTGTCGATTT;Hits=253;Alias=CELE1;Class=23H-RNA	TRUE
I	948277	948299	53	-	ID=CGCATTTTTTGTAGATCAAACCG;Hits=649;Alias=CELE14B;Class=23H-RNA	TRUE
I	948278	948299	6	-	ID=CGCATTTTTTGTAGATCAAACC;Hits=732;Alias=CELE14B;Class=23H-RNA	TRUE
I	948278	948300	27	-	ID=CCGCATTTTTTGTAGATCAAACC;Hits=693;Alias=CELE14B;Class=23H-RNA	TRUE
I	948280	948300	27	-	ID=CCGCATTTTTTGTAGATCAAA;Hits=974;Alias=CELE14B;Class=23H-RNA	TRUE
I	948280	948301	25	+	ID=TTTGATCTACAAAAAATGCGGG;Hits=878;Alias=CELE14B;Class=23H-RNA	TRUE
I	948280	948302	171	-	ID=TCCCGCATTTTTTGTAGATCAAA;Hits=830;Alias=CELE14B;Class=23H-RNA	TRUE
I	948281	948302	78	-	ID=TCCCGCATTTTTTGTAGATCAA;Hits=1072;Alias=CELE14B;Class=23H-RNA	TRUE
I	948282	948303	15	-	ID=TTCCCGCATTTTTTGTAGATCA;Hits=857;Alias=CELE14B;Class=23H-RNA	TRUE
I	948282	948304	76	+	ID=TGATCTACAAAAAATGCGGGAAT;Hits=762;Alias=CELE14B;Class=23H-RNA	TRUE
I	948282	948305	23	+	ID=TGATCTACAAAAAATGCGGGAATT;Hits=693;Alias=CELE14B;Class=23H-RNA	TRUE
I	948283	948303	5	-	ID=TTCCCGCATTTTTTGTAGATC;Hits=922;Alias=CELE14B;Class=23H-RNA	TRUE
I	949713	949736	23	-	ID=TGATCTACAAAAAATGCGGGAATT;Hits=693;Alias=CELE14B;Class=23H-RNA	TRUE
I	949714	949736	76	-	ID=TGATCTACAAAAAATGCGGGAAT;Hits=762;Alias=CELE14B;Class=23H-RNA	TRUE
I	949715	949735	5	+	ID=TTCCCGCATTTTTTGTAGATC;Hits=922;Alias=CELE14B;Class=23H-RNA	TRUE
I	949715	949736	15	+	ID=TTCCCGCATTTTTTGTAGATCA;Hits=857;Alias=CELE14B;Class=23H-RNA	TRUE
I	949716	949737	78	+	ID=TCCCGCATTTTTTGTAGATCAA;Hits=1072;Alias=CELE14B;Class=23H-RNA	TRUE
I	949716	949738	171	+	ID=TCCCGCATTTTTTGTAGATCAAA;Hits=830;Alias=CELE14B;Class=23H-RNA	TRUE
I	949717	949738	25	-	ID=TTTGATCTACAAAAAATGCGGG;Hits=878;Alias=CELE14B;Class=23H-RNA	TRUE
I	949718	949738	27	+	ID=CCGCATTTTTTGTAGATCAAA;Hits=974;Alias=CELE14B;Class=23H-RNA	TRUE
I	951524	951546	56	+	ID=ATCTACCTGTTGAACTTGACTCC;Hits=35;Alias=TIR54TA1;Class=23H-RNA	TRUE
I	967177	967198	14	+	ID=CAAATCGTCTCTTCCGCGCGCC;Hits=55;Alias=Unknown_RE1;Class=23H-RNA	TRUE
I	967209	967231	8	-	ID=AGAGTGACAGACATCCGGGACCC;Hits=48;Alias=Unknown_RE1;Class=23H-RNA	TRUE
I	967210	967231	44	-	ID=AGAGTGACAGACATCCGGGACC;Hits=52;Alias=Unknown_RE1;Class=23H-RNA	TRUE
I	967211	967231	10	-	ID=AGAGTGACAGACATCCGGGAC;Hits=53;Alias=Unknown_RE1;Class=23H-RNA	TRUE
I	967212	967233	14	+	ID=TCCCGGATGTCTGTCACTCTCT;Hits=50;Alias=Unknown_RE1;Class=23H-RNA	TRUE
I	967213	967235	41	-	ID=TTAGAGAGTGACAGACATCCGGG;Hits=49;Alias=Unknown_RE1;Class=23H-RNA	TRUE
I	967214	967236	16	+	ID=CCGGATGTCTGTCACTCTCTAAC;Hits=50;Alias=Unknown_RE1;Class=23H-RNA	TRUE
I	967215	967236	10	+	ID=CGGATGTCTGTCACTCTCTAAC;Hits=53;Alias=Unknown_RE1;Class=23H-RNA	TRUE
I	967221	967243	24	+	ID=TCTGTCACTCTCTAACTATCTAC;Hits=50;Alias=Unknown_RE1;Class=23H-RNA	TRUE
I	967235	967257	24	+	ID=ACTATCTACACTCTCTGTACCGG;Hits=68;Alias=Unknown_RE1;Class=23H-RNA	TRUE
I	967236	967257	220	+	ID=CTATCTACACTCTCTGTACCGG;Hits=69;Alias=Unknown_RE1;Class=23H-RNA	TRUE
I	967237	967257	20	+	ID=TATCTACACTCTCTGTACCGG;Hits=70;Alias=Unknown_RE1;Class=23H-RNA	TRUE
I	1003546	1003568	67	+	ID=TCCCGCATTTTTCGTAGATCAAA;Hits=98;Alias=CELE14B;Class=23H-RNA	TRUE
I	1012094	1012116	13	-	ID=AGCGAAAACTACAGTAATTCTTT;Hits=342;Alias=CELE1;Class=23H-RNA	TRUE
I	1012095	1012116	7	-	ID=AGCGAAAACTACAGTAATTCTT;Hits=384;Alias=CELE1;Class=23H-RNA	TRUE
I	1012095	1012117	35	-	ID=TAGCGAAAACTACAGTAATTCTT;Hits=331;Alias=CELE1;Class=23H-RNA	TRUE
I	1015936	1015959	11	+	ID=TACGGTTTGATCTACAAAAAATGC;Hits=344;Alias=CELE14B;Class=23H-RNA	TRUE
I	1015938	1015960	53	-	ID=CGCATTTTTTGTAGATCAAACCG;Hits=649;Alias=CELE14B;Class=23H-RNA	TRUE
I	1015939	1015960	6	-	ID=CGCATTTTTTGTAGATCAAACC;Hits=732;Alias=CELE14B;Class=23H-RNA	TRUE
I	1015939	1015961	27	-	ID=CCGCATTTTTTGTAGATCAAACC;Hits=693;Alias=CELE14B;Class=23H-RNA	TRUE
I	1015941	1015961	27	-	ID=CCGCATTTTTTGTAGATCAAA;Hits=974;Alias=CELE14B;Class=23H-RNA	TRUE
I	1015941	1015962	25	+	ID=TTTGATCTACAAAAAATGCGGG;Hits=878;Alias=CELE14B;Class=23H-RNA	TRUE
I	1015941	1015963	171	-	ID=TCCCGCATTTTTTGTAGATCAAA;Hits=830;Alias=CELE14B;Class=23H-RNA	TRUE
I	1015942	1015963	78	-	ID=TCCCGCATTTTTTGTAGATCAA;Hits=1072;Alias=CELE14B;Class=23H-RNA	TRUE
I	1015943	1015964	15	-	ID=TTCCCGCATTTTTTGTAGATCA;Hits=857;Alias=CELE14B;Class=23H-RNA	TRUE
I	1015943	1015965	76	+	ID=TGATCTACAAAAAATGCGGGAAT;Hits=762;Alias=CELE14B;Class=23H-RNA	TRUE
I	1015943	1015966	23	+	ID=TGATCTACAAAAAATGCGGGAATT;Hits=693;Alias=CELE14B;Class=23H-RNA	TRUE
I	1015944	1015964	5	-	ID=TTCCCGCATTTTTTGTAGATC;Hits=922;Alias=CELE14B;Class=23H-RNA	TRUE
I	1018413	1018435	67	+	ID=TCCCGCATTTTTCGTAGATCAAA;Hits=98;Alias=CELE14B;Class=23H-RNA	TRUE
I	1018413	1018435	9	-	ID=TTTGATCTACGAAAAATGCGGGA;Hits=98;Alias=CELE14B;Class=23H-RNA	TRUE
I	1018416	1018438	9	+	ID=CGCATTTTTCGTAGATCAAACCG;Hits=57;Alias=CELE14B;Class=23H-RNA	TRUE
I	1025373	1025394	13	+	ID=TCACGAGGGACGAGGAAAAGTG;Hits=316;Alias=PAL5A;Class=23H-RNA	TRUE
I	1025680	1025702	11	+	ID=TACCTGATTTTCATAACGAGACC;Hits=346;Alias=PAL5A;Class=23H-RNA	TRUE
I	1025683	1025705	36	-	ID=AGCGGTCTCGTTATGAAAATCAG;Hits=351;Alias=PAL5A;Class=23H-RNA	TRUE
I	1025685	1025707	22	-	ID=TCAGCGGTCTCGTTATGAAAATC;Hits=354;Alias=PAL5A;Class=23H-RNA	TRUE
I	1025690	1025711	14	-	ID=TTTTTCAGCGGTCTCGTTATGA;Hits=366;Alias=PAL5A;Class=23H-RNA	TRUE
I	1025690	1025712	63	-	ID=CTTTTTCAGCGGTCTCGTTATGA;Hits=354;Alias=PAL5A;Class=23H-RNA	TRUE
I	1025691	1025711	13	-	ID=TTTTTCAGCGGTCTCGTTATG;Hits=368;Alias=PAL5A;Class=23H-RNA	TRUE
I	1025691	1025712	62	-	ID=CTTTTTCAGCGGTCTCGTTATG;Hits=356;Alias=PAL5A;Class=23H-RNA	TRUE
I	1025691	1025713	40	-	ID=ACTTTTTCAGCGGTCTCGTTATG;Hits=355;Alias=PAL5A;Class=23H-RNA	TRUE
I	1025691	1025713	11	+	ID=CATAACGAGACCGCTGAAAAAGT;Hits=355;Alias=PAL5A;Class=23H-RNA	TRUE
I	1025692	1025713	18	+	ID=ATAACGAGACCGCTGAAAAAGT;Hits=371;Alias=PAL5A;Class=23H-RNA	TRUE
I	1025692	1025714	73	+	ID=ATAACGAGACCGCTGAAAAAGTT;Hits=369;Alias=PAL5A;Class=23H-RNA	TRUE
I	1025693	1025714	87	+	ID=TAACGAGACCGCTGAAAAAGTT;Hits=369;Alias=PAL5A;Class=23H-RNA	TRUE
I	1025693	1025715	46	+	ID=TAACGAGACCGCTGAAAAAGTTT;Hits=364;Alias=PAL5A;Class=23H-RNA	TRUE
I	1025694	1025715	24	+	ID=AACGAGACCGCTGAAAAAGTTT;Hits=371;Alias=PAL5A;Class=23H-RNA	TRUE
I	1025800	1025822	22	+	ID=TCAGCGGTCTCGTTATGAAAATC;Hits=354;Alias=PAL5A;Class=23H-RNA	TRUE
I	1025802	1025824	36	+	ID=AGCGGTCTCGTTATGAAAATCAG;Hits=351;Alias=PAL5A;Class=23H-RNA	TRUE
I	1025805	1025827	11	-	ID=TACCTGATTTTCATAACGAGACC;Hits=346;Alias=PAL5A;Class=23H-RNA	TRUE
I	1026111	1026132	13	-	ID=TCACGAGGGACGAGGAAAAGTG;Hits=316;Alias=PAL5A;Class=23H-RNA	TRUE
I	1038884	1038905	10	+	ID=TACACGAGCTGCGTAAATCGAC;Hits=69;Alias=other;Class=23H-RNA	TRUE
I	1048829	1048851	53	-	ID=CGCATTTTTTGTAGATCAAACCG;Hits=649;Alias=CELE14B;Class=23H-RNA	TRUE
I	1048830	1048851	6	-	ID=CGCATTTTTTGTAGATCAAACC;Hits=732;Alias=CELE14B;Class=23H-RNA	TRUE
I	1048830	1048852	27	-	ID=CCGCATTTTTTGTAGATCAAACC;Hits=693;Alias=CELE14B;Class=23H-RNA	TRUE
I	1048832	1048852	27	-	ID=CCGCATTTTTTGTAGATCAAA;Hits=974;Alias=CELE14B;Class=23H-RNA	TRUE
I	1048832	1048853	25	+	ID=TTTGATCTACAAAAAATGCGGG;Hits=878;Alias=CELE14B;Class=23H-RNA	TRUE
I	1048832	1048854	171	-	ID=TCCCGCATTTTTTGTAGATCAAA;Hits=830;Alias=CELE14B;Class=23H-RNA	TRUE
I	1050850	1050873	23	-	ID=TGATCTACAAAAAATGCGGGAATT;Hits=693;Alias=CELE14B;Class=23H-RNA	TRUE
I	1050851	1050873	76	-	ID=TGATCTACAAAAAATGCGGGAAT;Hits=762;Alias=CELE14B;Class=23H-RNA	TRUE
I	1050852	1050872	5	+	ID=TTCCCGCATTTTTTGTAGATC;Hits=922;Alias=CELE14B;Class=23H-RNA	TRUE
I	1050852	1050873	15	+	ID=TTCCCGCATTTTTTGTAGATCA;Hits=857;Alias=CELE14B;Class=23H-RNA	TRUE
I	1050853	1050874	78	+	ID=TCCCGCATTTTTTGTAGATCAA;Hits=1072;Alias=CELE14B;Class=23H-RNA	TRUE
I	1050853	1050875	171	+	ID=TCCCGCATTTTTTGTAGATCAAA;Hits=830;Alias=CELE14B;Class=23H-RNA	TRUE
I	1050854	1050875	25	-	ID=TTTGATCTACAAAAAATGCGGG;Hits=878;Alias=CELE14B;Class=23H-RNA	TRUE
I	1050855	1050875	27	+	ID=CCGCATTTTTTGTAGATCAAA;Hits=974;Alias=CELE14B;Class=23H-RNA	TRUE
I	1050855	1050877	27	+	ID=CCGCATTTTTTGTAGATCAAACC;Hits=693;Alias=CELE14B;Class=23H-RNA	TRUE
I	1050856	1050877	6	+	ID=CGCATTTTTTGTAGATCAAACC;Hits=732;Alias=CELE14B;Class=23H-RNA	TRUE
I	1050856	1050878	53	+	ID=CGCATTTTTTGTAGATCAAACCG;Hits=649;Alias=CELE14B;Class=23H-RNA	TRUE
I	1050857	1050880	11	-	ID=TACGGTTTGATCTACAAAAAATGC;Hits=344;Alias=CELE14B;Class=23H-RNA	TRUE
I	1051282	1051305	11	+	ID=TACGGTTTGATCTACAAAAAATGC;Hits=344;Alias=CELE14B;Class=23H-RNA	TRUE
I	1051284	1051306	53	-	ID=CGCATTTTTTGTAGATCAAACCG;Hits=649;Alias=CELE14B;Class=23H-RNA	TRUE
I	1051285	1051306	6	-	ID=CGCATTTTTTGTAGATCAAACC;Hits=732;Alias=CELE14B;Class=23H-RNA	TRUE
I	1051285	1051307	27	-	ID=CCGCATTTTTTGTAGATCAAACC;Hits=693;Alias=CELE14B;Class=23H-RNA	TRUE
I	1051287	1051307	27	-	ID=CCGCATTTTTTGTAGATCAAA;Hits=974;Alias=CELE14B;Class=23H-RNA	TRUE
I	1051287	1051308	25	+	ID=TTTGATCTACAAAAAATGCGGG;Hits=878;Alias=CELE14B;Class=23H-RNA	TRUE
I	1051287	1051309	171	-	ID=TCCCGCATTTTTTGTAGATCAAA;Hits=830;Alias=CELE14B;Class=23H-RNA	TRUE
I	1051288	1051309	78	-	ID=TCCCGCATTTTTTGTAGATCAA;Hits=1072;Alias=CELE14B;Class=23H-RNA	TRUE
I	1051289	1051310	15	-	ID=TTCCCGCATTTTTTGTAGATCA;Hits=857;Alias=CELE14B;Class=23H-RNA	TRUE
I	1051289	1051311	76	+	ID=TGATCTACAAAAAATGCGGGAAT;Hits=762;Alias=CELE14B;Class=23H-RNA	TRUE
I	1051289	1051312	23	+	ID=TGATCTACAAAAAATGCGGGAATT;Hits=693;Alias=CELE14B;Class=23H-RNA	TRUE
I	1051290	1051310	5	-	ID=TTCCCGCATTTTTTGTAGATC;Hits=922;Alias=CELE14B;Class=23H-RNA	TRUE
I	1051811	1051833	13	-	ID=AGCGAAAACTACAGTAATTCTTT;Hits=342;Alias=CELE1;Class=23H-RNA	TRUE
I	1051812	1051833	7	-	ID=AGCGAAAACTACAGTAATTCTT;Hits=384;Alias=CELE1;Class=23H-RNA	TRUE
I	1051812	1051834	35	-	ID=TAGCGAAAACTACAGTAATTCTT;Hits=331;Alias=CELE1;Class=23H-RNA	TRUE
I	1052492	1052514	171	+	ID=TCCCGCATTTTTTGTAGATCAAA;Hits=830;Alias=CELE14B;Class=23H-RNA	TRUE
I	1052493	1052514	25	-	ID=TTTGATCTACAAAAAATGCGGG;Hits=878;Alias=CELE14B;Class=23H-RNA	TRUE
I	1052494	1052514	27	+	ID=CCGCATTTTTTGTAGATCAAA;Hits=974;Alias=CELE14B;Class=23H-RNA	TRUE
I	1052494	1052516	27	+	ID=CCGCATTTTTTGTAGATCAAACC;Hits=693;Alias=CELE14B;Class=23H-RNA	TRUE
I	1052495	1052516	6	+	ID=CGCATTTTTTGTAGATCAAACC;Hits=732;Alias=CELE14B;Class=23H-RNA	TRUE
I	1053970	1053990	27	-	ID=CCGCATTTTTTGTAGATCAAA;Hits=974;Alias=CELE14B;Class=23H-RNA	TRUE
I	1053970	1053991	25	+	ID=TTTGATCTACAAAAAATGCGGG;Hits=878;Alias=CELE14B;Class=23H-RNA	TRUE
I	1053970	1053992	171	-	ID=TCCCGCATTTTTTGTAGATCAAA;Hits=830;Alias=CELE14B;Class=23H-RNA	TRUE
I	1053971	1053992	78	-	ID=TCCCGCATTTTTTGTAGATCAA;Hits=1072;Alias=CELE14B;Class=23H-RNA	TRUE
I	1053972	1053993	15	-	ID=TTCCCGCATTTTTTGTAGATCA;Hits=857;Alias=CELE14B;Class=23H-RNA	TRUE
I	1053972	1053994	76	+	ID=TGATCTACAAAAAATGCGGGAAT;Hits=762;Alias=CELE14B;Class=23H-RNA	TRUE
I	1053972	1053995	23	+	ID=TGATCTACAAAAAATGCGGGAATT;Hits=693;Alias=CELE14B;Class=23H-RNA	TRUE
I	1053973	1053993	5	-	ID=TTCCCGCATTTTTTGTAGATC;Hits=922;Alias=CELE14B;Class=23H-RNA	TRUE
I	1054545	1054568	11	+	ID=TACGGTTTGATCTACAAAAAATGC;Hits=344;Alias=CELE14B;Class=23H-RNA	TRUE
I	1054547	1054569	53	-	ID=CGCATTTTTTGTAGATCAAACCG;Hits=649;Alias=CELE14B;Class=23H-RNA	TRUE
I	1054548	1054569	6	-	ID=CGCATTTTTTGTAGATCAAACC;Hits=732;Alias=CELE14B;Class=23H-RNA	TRUE
I	1054548	1054570	27	-	ID=CCGCATTTTTTGTAGATCAAACC;Hits=693;Alias=CELE14B;Class=23H-RNA	TRUE
I	1054550	1054570	27	-	ID=CCGCATTTTTTGTAGATCAAA;Hits=974;Alias=CELE14B;Class=23H-RNA	TRUE
I	1054550	1054571	25	+	ID=TTTGATCTACAAAAAATGCGGG;Hits=878;Alias=CELE14B;Class=23H-RNA	TRUE
I	1054550	1054572	171	-	ID=TCCCGCATTTTTTGTAGATCAAA;Hits=830;Alias=CELE14B;Class=23H-RNA	TRUE
I	1054551	1054572	78	-	ID=TCCCGCATTTTTTGTAGATCAA;Hits=1072;Alias=CELE14B;Class=23H-RNA	TRUE
I	1054552	1054573	15	-	ID=TTCCCGCATTTTTTGTAGATCA;Hits=857;Alias=CELE14B;Class=23H-RNA	TRUE
I	1054552	1054574	76	+	ID=TGATCTACAAAAAATGCGGGAAT;Hits=762;Alias=CELE14B;Class=23H-RNA	TRUE
I	1054552	1054575	23	+	ID=TGATCTACAAAAAATGCGGGAATT;Hits=693;Alias=CELE14B;Class=23H-RNA	TRUE
I	1054553	1054573	5	-	ID=TTCCCGCATTTTTTGTAGATC;Hits=922;Alias=CELE14B;Class=23H-RNA	TRUE
I	1054636	1054657	78	+	ID=TCCCGCATTTTTTGTAGATCAA;Hits=1072;Alias=CELE14B;Class=23H-RNA	TRUE
I	1054639	1054660	6	+	ID=CGCATTTTTTGTAGATCAACGT;Hits=155;Alias=CELE14B;Class=23H-RNA	TRUE
I	1062868	1062891	23	-	ID=TGATCTACAAAAAATGCGGGAATT;Hits=693;Alias=CELE14B;Class=23H-RNA	TRUE
I	1062869	1062891	76	-	ID=TGATCTACAAAAAATGCGGGAAT;Hits=762;Alias=CELE14B;Class=23H-RNA	TRUE
I	1062870	1062890	5	+	ID=TTCCCGCATTTTTTGTAGATC;Hits=922;Alias=CELE14B;Class=23H-RNA	TRUE
I	1062870	1062891	15	+	ID=TTCCCGCATTTTTTGTAGATCA;Hits=857;Alias=CELE14B;Class=23H-RNA	TRUE
I	1062871	1062892	78	+	ID=TCCCGCATTTTTTGTAGATCAA;Hits=1072;Alias=CELE14B;Class=23H-RNA	TRUE
I	1062871	1062893	171	+	ID=TCCCGCATTTTTTGTAGATCAAA;Hits=830;Alias=CELE14B;Class=23H-RNA	TRUE
I	1062872	1062893	25	-	ID=TTTGATCTACAAAAAATGCGGG;Hits=878;Alias=CELE14B;Class=23H-RNA	TRUE
I	1062873	1062893	27	+	ID=CCGCATTTTTTGTAGATCAAA;Hits=974;Alias=CELE14B;Class=23H-RNA	TRUE
I	1062873	1062895	27	+	ID=CCGCATTTTTTGTAGATCAAACC;Hits=693;Alias=CELE14B;Class=23H-RNA	TRUE
I	1062874	1062895	6	+	ID=CGCATTTTTTGTAGATCAAACC;Hits=732;Alias=CELE14B;Class=23H-RNA	TRUE
I	1062874	1062896	53	+	ID=CGCATTTTTTGTAGATCAAACCG;Hits=649;Alias=CELE14B;Class=23H-RNA	TRUE
I	1063349	1063372	23	-	ID=TGATCTACAAAAAATGCGGGAATT;Hits=693;Alias=CELE14B;Class=23H-RNA	TRUE
I	1063350	1063372	76	-	ID=TGATCTACAAAAAATGCGGGAAT;Hits=762;Alias=CELE14B;Class=23H-RNA	TRUE
I	1063351	1063371	5	+	ID=TTCCCGCATTTTTTGTAGATC;Hits=922;Alias=CELE14B;Class=23H-RNA	TRUE
I	1063351	1063372	15	+	ID=TTCCCGCATTTTTTGTAGATCA;Hits=857;Alias=CELE14B;Class=23H-RNA	TRUE
I	1063352	1063373	78	+	ID=TCCCGCATTTTTTGTAGATCAA;Hits=1072;Alias=CELE14B;Class=23H-RNA	TRUE
I	1063352	1063374	171	+	ID=TCCCGCATTTTTTGTAGATCAAA;Hits=830;Alias=CELE14B;Class=23H-RNA	TRUE
I	1063353	1063374	25	-	ID=TTTGATCTACAAAAAATGCGGG;Hits=878;Alias=CELE14B;Class=23H-RNA	TRUE
I	1063354	1063374	27	+	ID=CCGCATTTTTTGTAGATCAAA;Hits=974;Alias=CELE14B;Class=23H-RNA	TRUE
I	1063354	1063376	27	+	ID=CCGCATTTTTTGTAGATCAAACC;Hits=693;Alias=CELE14B;Class=23H-RNA	TRUE
I	1063355	1063376	6	+	ID=CGCATTTTTTGTAGATCAAACC;Hits=732;Alias=CELE14B;Class=23H-RNA	TRUE
I	1063355	1063377	53	+	ID=CGCATTTTTTGTAGATCAAACCG;Hits=649;Alias=CELE14B;Class=23H-RNA	TRUE
I	1064261	1064283	16	-	ID=TCTCGCCGTCCATCGACTTTAAA;Hits=86;Alias=PALTTAA1;Class=23H-RNA	TRUE
I	1064262	1064283	10	-	ID=TCTCGCCGTCCATCGACTTTAA;Hits=86;Alias=PALTTAA1;Class=23H-RNA	TRUE
I	1064263	1064285	42	+	ID=TAAAGTCGATGGACGGCGAGATT;Hits=85;Alias=PALTTAA1;Class=23H-RNA	TRUE
I	1064264	1064285	43	+	ID=AACAACGAAGCTCCGAAATAACG;Hits=9;Alias=PALTTAA1;Class=23H-RNA	TRUE
I	1064304	1064325	39	-	ID=AAAGTTGATGGACGGCGAGATT;Hits=5;Alias=PALTTAA1;Class=23H-RNA	TRUE
I	1064304	1064327	10	-	ID=TTAAAGTTGATGGACGGCGAGATT;Hits=5;Alias=PALTTAA1;Class=23H-RNA	TRUE
I	1065058	1065080	5	-	ID=CCGCATTTTTTGTAGATCAAAGC;Hits=29;Alias=CELE14B;Class=23H-RNA	TRUE
I	1065060	1065080	27	-	ID=CCGCATTTTTTGTAGATCAAA;Hits=974;Alias=CELE14B;Class=23H-RNA	TRUE
I	1065060	1065081	25	+	ID=TTTGATCTACAAAAAATGCGGG;Hits=878;Alias=CELE14B;Class=23H-RNA	TRUE
I	1065060	1065082	171	-	ID=TCCCGCATTTTTTGTAGATCAAA;Hits=830;Alias=CELE14B;Class=23H-RNA	TRUE
I	1065161	1065184	23	-	ID=TGATCTACAAAAAATGCGGGAATT;Hits=693;Alias=CELE14B;Class=23H-RNA	TRUE
I	1065162	1065184	76	-	ID=TGATCTACAAAAAATGCGGGAAT;Hits=762;Alias=CELE14B;Class=23H-RNA	TRUE
I	1065163	1065183	5	+	ID=TTCCCGCATTTTTTGTAGATC;Hits=922;Alias=CELE14B;Class=23H-RNA	TRUE
I	1065163	1065184	15	+	ID=TTCCCGCATTTTTTGTAGATCA;Hits=857;Alias=CELE14B;Class=23H-RNA	TRUE
I	1065164	1065185	78	+	ID=TCCCGCATTTTTTGTAGATCAA;Hits=1072;Alias=CELE14B;Class=23H-RNA	TRUE
I	1065164	1065186	171	+	ID=TCCCGCATTTTTTGTAGATCAAA;Hits=830;Alias=CELE14B;Class=23H-RNA	TRUE
I	1065165	1065186	25	-	ID=TTTGATCTACAAAAAATGCGGG;Hits=878;Alias=CELE14B;Class=23H-RNA	TRUE
I	1065166	1065186	27	+	ID=CCGCATTTTTTGTAGATCAAA;Hits=974;Alias=CELE14B;Class=23H-RNA	TRUE
I	1065166	1065188	27	+	ID=CCGCATTTTTTGTAGATCAAACC;Hits=693;Alias=CELE14B;Class=23H-RNA	TRUE
I	1065167	1065188	6	+	ID=CGCATTTTTTGTAGATCAAACC;Hits=732;Alias=CELE14B;Class=23H-RNA	TRUE
I	1065167	1065189	53	+	ID=CGCATTTTTTGTAGATCAAACCG;Hits=649;Alias=CELE14B;Class=23H-RNA	TRUE
I	1065628	1065651	23	-	ID=TGATCTACAAAAAATGCGGGAATT;Hits=693;Alias=CELE14B;Class=23H-RNA	TRUE
I	1065629	1065651	76	-	ID=TGATCTACAAAAAATGCGGGAAT;Hits=762;Alias=CELE14B;Class=23H-RNA	TRUE
I	1065630	1065650	5	+	ID=TTCCCGCATTTTTTGTAGATC;Hits=922;Alias=CELE14B;Class=23H-RNA	TRUE
I	1065630	1065651	15	+	ID=TTCCCGCATTTTTTGTAGATCA;Hits=857;Alias=CELE14B;Class=23H-RNA	TRUE
I	1065631	1065652	78	+	ID=TCCCGCATTTTTTGTAGATCAA;Hits=1072;Alias=CELE14B;Class=23H-RNA	TRUE
I	1065631	1065653	171	+	ID=TCCCGCATTTTTTGTAGATCAAA;Hits=830;Alias=CELE14B;Class=23H-RNA	TRUE
I	1065632	1065653	25	-	ID=TTTGATCTACAAAAAATGCGGG;Hits=878;Alias=CELE14B;Class=23H-RNA	TRUE
I	1065633	1065653	27	+	ID=CCGCATTTTTTGTAGATCAAA;Hits=974;Alias=CELE14B;Class=23H-RNA	TRUE
I	1065633	1065655	27	+	ID=CCGCATTTTTTGTAGATCAAACC;Hits=693;Alias=CELE14B;Class=23H-RNA	TRUE
I	1065634	1065655	6	+	ID=CGCATTTTTTGTAGATCAAACC;Hits=732;Alias=CELE14B;Class=23H-RNA	TRUE
I	1065634	1065656	53	+	ID=CGCATTTTTTGTAGATCAAACCG;Hits=649;Alias=CELE14B;Class=23H-RNA	TRUE
I	1065635	1065658	11	-	ID=TACGGTTTGATCTACAAAAAATGC;Hits=344;Alias=CELE14B;Class=23H-RNA	TRUE
I	1071089	1071112	23	-	ID=TGATCTACAAAAAATGCGGGAATT;Hits=693;Alias=CELE14B;Class=23H-RNA	TRUE
I	1071090	1071112	76	-	ID=TGATCTACAAAAAATGCGGGAAT;Hits=762;Alias=CELE14B;Class=23H-RNA	TRUE
I	1071091	1071111	5	+	ID=TTCCCGCATTTTTTGTAGATC;Hits=922;Alias=CELE14B;Class=23H-RNA	TRUE
I	1071091	1071112	15	+	ID=TTCCCGCATTTTTTGTAGATCA;Hits=857;Alias=CELE14B;Class=23H-RNA	TRUE
I	1071092	1071113	78	+	ID=TCCCGCATTTTTTGTAGATCAA;Hits=1072;Alias=CELE14B;Class=23H-RNA	TRUE
I	1071092	1071114	171	+	ID=TCCCGCATTTTTTGTAGATCAAA;Hits=830;Alias=CELE14B;Class=23H-RNA	TRUE
I	1071093	1071114	25	-	ID=TTTGATCTACAAAAAATGCGGG;Hits=878;Alias=CELE14B;Class=23H-RNA	TRUE
I	1071094	1071114	27	+	ID=CCGCATTTTTTGTAGATCAAA;Hits=974;Alias=CELE14B;Class=23H-RNA	TRUE
I	1071094	1071116	27	+	ID=CCGCATTTTTTGTAGATCAAACC;Hits=693;Alias=CELE14B;Class=23H-RNA	TRUE
I	1071095	1071116	6	+	ID=CGCATTTTTTGTAGATCAAACC;Hits=732;Alias=CELE14B;Class=23H-RNA	TRUE
I	1071095	1071117	53	+	ID=CGCATTTTTTGTAGATCAAACCG;Hits=649;Alias=CELE14B;Class=23H-RNA	TRUE
I	1071096	1071119	11	-	ID=TACGGTTTGATCTACAAAAAATGC;Hits=344;Alias=CELE14B;Class=23H-RNA	TRUE
I	1071396	1071417	25	-	ID=TTTGATCTACAAAAAATGCGGG;Hits=878;Alias=CELE14B;Class=23H-RNA	TRUE
I	1072196	1072219	11	+	ID=TACGGTTTGATCTACAAAAAATGC;Hits=344;Alias=CELE14B;Class=23H-RNA	TRUE
I	1072198	1072220	53	-	ID=CGCATTTTTTGTAGATCAAACCG;Hits=649;Alias=CELE14B;Class=23H-RNA	TRUE
I	1072199	1072220	6	-	ID=CGCATTTTTTGTAGATCAAACC;Hits=732;Alias=CELE14B;Class=23H-RNA	TRUE
I	1072199	1072221	27	-	ID=CCGCATTTTTTGTAGATCAAACC;Hits=693;Alias=CELE14B;Class=23H-RNA	TRUE
I	1072201	1072221	27	-	ID=CCGCATTTTTTGTAGATCAAA;Hits=974;Alias=CELE14B;Class=23H-RNA	TRUE
I	1072201	1072222	25	+	ID=TTTGATCTACAAAAAATGCGGG;Hits=878;Alias=CELE14B;Class=23H-RNA	TRUE
I	1072201	1072223	171	-	ID=TCCCGCATTTTTTGTAGATCAAA;Hits=830;Alias=CELE14B;Class=23H-RNA	TRUE
I	1072202	1072223	78	-	ID=TCCCGCATTTTTTGTAGATCAA;Hits=1072;Alias=CELE14B;Class=23H-RNA	TRUE
I	1072203	1072224	15	-	ID=TTCCCGCATTTTTTGTAGATCA;Hits=857;Alias=CELE14B;Class=23H-RNA	TRUE
I	1072203	1072225	76	+	ID=TGATCTACAAAAAATGCGGGAAT;Hits=762;Alias=CELE14B;Class=23H-RNA	TRUE
I	1072203	1072226	23	+	ID=TGATCTACAAAAAATGCGGGAATT;Hits=693;Alias=CELE14B;Class=23H-RNA	TRUE
I	1072204	1072224	5	-	ID=TTCCCGCATTTTTTGTAGATC;Hits=922;Alias=CELE14B;Class=23H-RNA	TRUE
I	1073550	1073570	27	-	ID=CCGCATTTTTTGTAGATCAAA;Hits=974;Alias=CELE14B;Class=23H-RNA	TRUE
I	1073550	1073572	171	-	ID=TCCCGCATTTTTTGTAGATCAAA;Hits=830;Alias=CELE14B;Class=23H-RNA	TRUE
I	1073551	1073572	78	-	ID=TCCCGCATTTTTTGTAGATCAA;Hits=1072;Alias=CELE14B;Class=23H-RNA	TRUE
I	1073552	1073573	15	-	ID=TTCCCGCATTTTTTGTAGATCA;Hits=857;Alias=CELE14B;Class=23H-RNA	TRUE
I	1073552	1073574	76	+	ID=TGATCTACAAAAAATGCGGGAAT;Hits=762;Alias=CELE14B;Class=23H-RNA	TRUE
I	1073552	1073575	23	+	ID=TGATCTACAAAAAATGCGGGAATT;Hits=693;Alias=CELE14B;Class=23H-RNA	TRUE
I	1073553	1073573	5	-	ID=TTCCCGCATTTTTTGTAGATC;Hits=922;Alias=CELE14B;Class=23H-RNA	TRUE
I	1090376	1090397	78	+	ID=TCCCGCATTTTTTGTAGATCAA;Hits=1072;Alias=CELE14B;Class=23H-RNA	TRUE
I	1127433	1127456	23	-	ID=TGATCTACAAAAAATGCGGGAATT;Hits=693;Alias=CELE14B;Class=23H-RNA	TRUE
I	1127434	1127456	76	-	ID=TGATCTACAAAAAATGCGGGAAT;Hits=762;Alias=CELE14B;Class=23H-RNA	TRUE
I	1127435	1127455	5	+	ID=TTCCCGCATTTTTTGTAGATC;Hits=922;Alias=CELE14B;Class=23H-RNA	TRUE
I	1127435	1127456	15	+	ID=TTCCCGCATTTTTTGTAGATCA;Hits=857;Alias=CELE14B;Class=23H-RNA	TRUE
I	1127436	1127457	78	+	ID=TCCCGCATTTTTTGTAGATCAA;Hits=1072;Alias=CELE14B;Class=23H-RNA	TRUE
I	1127436	1127458	171	+	ID=TCCCGCATTTTTTGTAGATCAAA;Hits=830;Alias=CELE14B;Class=23H-RNA	TRUE
I	1127437	1127458	25	-	ID=TTTGATCTACAAAAAATGCGGG;Hits=878;Alias=CELE14B;Class=23H-RNA	TRUE
I	1127438	1127458	27	+	ID=CCGCATTTTTTGTAGATCAAA;Hits=974;Alias=CELE14B;Class=23H-RNA	TRUE
I	1127438	1127460	27	+	ID=CCGCATTTTTTGTAGATCAAACC;Hits=693;Alias=CELE14B;Class=23H-RNA	TRUE
I	1127439	1127460	6	+	ID=CGCATTTTTTGTAGATCAAACC;Hits=732;Alias=CELE14B;Class=23H-RNA	TRUE
I	1127439	1127461	53	+	ID=CGCATTTTTTGTAGATCAAACCG;Hits=649;Alias=CELE14B;Class=23H-RNA	TRUE
I	1129598	1129620	53	-	ID=CGCATTTTTTGTAGATCAAACCG;Hits=649;Alias=CELE14B;Class=23H-RNA	TRUE
I	1129599	1129620	6	-	ID=CGCATTTTTTGTAGATCAAACC;Hits=732;Alias=CELE14B;Class=23H-RNA	TRUE
I	1129599	1129621	27	-	ID=CCGCATTTTTTGTAGATCAAACC;Hits=693;Alias=CELE14B;Class=23H-RNA	TRUE
I	1129601	1129621	27	-	ID=CCGCATTTTTTGTAGATCAAA;Hits=974;Alias=CELE14B;Class=23H-RNA	TRUE
I	1129601	1129622	25	+	ID=TTTGATCTACAAAAAATGCGGG;Hits=878;Alias=CELE14B;Class=23H-RNA	TRUE
I	1129601	1129623	171	-	ID=TCCCGCATTTTTTGTAGATCAAA;Hits=830;Alias=CELE14B;Class=23H-RNA	TRUE
I	1129602	1129623	78	-	ID=TCCCGCATTTTTTGTAGATCAA;Hits=1072;Alias=CELE14B;Class=23H-RNA	TRUE
I	1129603	1129624	15	-	ID=TTCCCGCATTTTTTGTAGATCA;Hits=857;Alias=CELE14B;Class=23H-RNA	TRUE
I	1129603	1129625	76	+	ID=TGATCTACAAAAAATGCGGGAAT;Hits=762;Alias=CELE14B;Class=23H-RNA	TRUE
I	1129603	1129626	23	+	ID=TGATCTACAAAAAATGCGGGAATT;Hits=693;Alias=CELE14B;Class=23H-RNA	TRUE
I	1129604	1129624	5	-	ID=TTCCCGCATTTTTTGTAGATC;Hits=922;Alias=CELE14B;Class=23H-RNA	TRUE
I	1132572	1132595	23	-	ID=TGATCTACAAAAAATGCGGGAATT;Hits=693;Alias=CELE14B;Class=23H-RNA	TRUE
I	1132573	1132595	76	-	ID=TGATCTACAAAAAATGCGGGAAT;Hits=762;Alias=CELE14B;Class=23H-RNA	TRUE
I	1132574	1132594	5	+	ID=TTCCCGCATTTTTTGTAGATC;Hits=922;Alias=CELE14B;Class=23H-RNA	TRUE
I	1132574	1132595	15	+	ID=TTCCCGCATTTTTTGTAGATCA;Hits=857;Alias=CELE14B;Class=23H-RNA	TRUE
I	1132575	1132596	78	+	ID=TCCCGCATTTTTTGTAGATCAA;Hits=1072;Alias=CELE14B;Class=23H-RNA	TRUE
I	1132575	1132597	171	+	ID=TCCCGCATTTTTTGTAGATCAAA;Hits=830;Alias=CELE14B;Class=23H-RNA	TRUE
I	1132576	1132597	25	-	ID=TTTGATCTACAAAAAATGCGGG;Hits=878;Alias=CELE14B;Class=23H-RNA	TRUE
I	1132577	1132597	27	+	ID=CCGCATTTTTTGTAGATCAAA;Hits=974;Alias=CELE14B;Class=23H-RNA	TRUE
I	1137369	1137392	11	+	ID=TACGGTTTGATCTACAAAAAATGC;Hits=344;Alias=CELE14B;Class=23H-RNA	TRUE
I	1137371	1137393	53	-	ID=CGCATTTTTTGTAGATCAAACCG;Hits=649;Alias=CELE14B;Class=23H-RNA	TRUE
I	1137372	1137393	6	-	ID=CGCATTTTTTGTAGATCAAACC;Hits=732;Alias=CELE14B;Class=23H-RNA	TRUE
I	1137372	1137394	27	-	ID=CCGCATTTTTTGTAGATCAAACC;Hits=693;Alias=CELE14B;Class=23H-RNA	TRUE
I	1137374	1137394	27	-	ID=CCGCATTTTTTGTAGATCAAA;Hits=974;Alias=CELE14B;Class=23H-RNA	TRUE
I	1137374	1137395	25	+	ID=TTTGATCTACAAAAAATGCGGG;Hits=878;Alias=CELE14B;Class=23H-RNA	TRUE
I	1137374	1137396	171	-	ID=TCCCGCATTTTTTGTAGATCAAA;Hits=830;Alias=CELE14B;Class=23H-RNA	TRUE
I	1137375	1137396	78	-	ID=TCCCGCATTTTTTGTAGATCAA;Hits=1072;Alias=CELE14B;Class=23H-RNA	TRUE
I	1137376	1137397	15	-	ID=TTCCCGCATTTTTTGTAGATCA;Hits=857;Alias=CELE14B;Class=23H-RNA	TRUE
I	1137376	1137398	76	+	ID=TGATCTACAAAAAATGCGGGAAT;Hits=762;Alias=CELE14B;Class=23H-RNA	TRUE
I	1137376	1137399	23	+	ID=TGATCTACAAAAAATGCGGGAATT;Hits=693;Alias=CELE14B;Class=23H-RNA	TRUE
I	1137377	1137397	5	-	ID=TTCCCGCATTTTTTGTAGATC;Hits=922;Alias=CELE14B;Class=23H-RNA	TRUE
I	1139394	1139416	7	-	ID=TCAAAATTTGACGGTGATTTCAA;Hits=92;Alias=PALTTAA1;Class=23H-RNA	TRUE
I	1139517	1139539	7	+	ID=TCAAAATTTGACGGTGATTTCAA;Hits=92;Alias=PALTTAA1;Class=23H-RNA	TRUE
I	1140673	1140695	14	-	ID=TACTGTAGCGCTTGTGTCGATTT;Hits=253;Alias=CELE1;Class=23H-RNA	TRUE
I	1140674	1140695	15	-	ID=TACTGTAGCGCTTGTGTCGATT;Hits=262;Alias=CELE1;Class=23H-RNA	TRUE
I	1140675	1140696	12	+	ID=ATCGACACAAGCGCTACAGTAG;Hits=228;Alias=CELE1;Class=23H-RNA	TRUE
I	1140675	1140697	54	+	ID=ATCGACACAAGCGCTACAGTAGT;Hits=211;Alias=CELE1;Class=23H-RNA	TRUE
I	1148272	1148294	7	-	ID=TCAAAATTTGACGGTGATTTCAA;Hits=92;Alias=PALTTAA1;Class=23H-RNA	TRUE
I	1151261	1151282	13	+	ID=TCACGAGGGACGAGGAAAAGTG;Hits=316;Alias=PAL5A;Class=23H-RNA	TRUE
I	1151567	1151589	11	+	ID=TACCTGATTTTCATAACGAGACC;Hits=346;Alias=PAL5A;Class=23H-RNA	TRUE
I	1151570	1151592	36	-	ID=AGCGGTCTCGTTATGAAAATCAG;Hits=351;Alias=PAL5A;Class=23H-RNA	TRUE
I	1151572	1151594	22	-	ID=TCAGCGGTCTCGTTATGAAAATC;Hits=354;Alias=PAL5A;Class=23H-RNA	TRUE
I	1151577	1151598	14	-	ID=TTTTTCAGCGGTCTCGTTATGA;Hits=366;Alias=PAL5A;Class=23H-RNA	TRUE
I	1151577	1151599	63	-	ID=CTTTTTCAGCGGTCTCGTTATGA;Hits=354;Alias=PAL5A;Class=23H-RNA	TRUE
I	1151578	1151598	13	-	ID=TTTTTCAGCGGTCTCGTTATG;Hits=368;Alias=PAL5A;Class=23H-RNA	TRUE
I	1151578	1151599	62	-	ID=CTTTTTCAGCGGTCTCGTTATG;Hits=356;Alias=PAL5A;Class=23H-RNA	TRUE
I	1151578	1151600	40	-	ID=ACTTTTTCAGCGGTCTCGTTATG;Hits=355;Alias=PAL5A;Class=23H-RNA	TRUE
I	1151578	1151600	11	+	ID=CATAACGAGACCGCTGAAAAAGT;Hits=355;Alias=PAL5A;Class=23H-RNA	TRUE
I	1151579	1151600	18	+	ID=ATAACGAGACCGCTGAAAAAGT;Hits=371;Alias=PAL5A;Class=23H-RNA	TRUE
I	1151579	1151601	73	+	ID=ATAACGAGACCGCTGAAAAAGTT;Hits=369;Alias=PAL5A;Class=23H-RNA	TRUE
I	1151580	1151601	87	+	ID=TAACGAGACCGCTGAAAAAGTT;Hits=369;Alias=PAL5A;Class=23H-RNA	TRUE
I	1151580	1151602	46	+	ID=TAACGAGACCGCTGAAAAAGTTT;Hits=364;Alias=PAL5A;Class=23H-RNA	TRUE
I	1151581	1151602	24	+	ID=AACGAGACCGCTGAAAAAGTTT;Hits=371;Alias=PAL5A;Class=23H-RNA	TRUE
I	1151679	1151700	24	-	ID=AACGAGACCGCTGAAAAAGTTT;Hits=371;Alias=PAL5A;Class=23H-RNA	TRUE
I	1151679	1151701	46	-	ID=TAACGAGACCGCTGAAAAAGTTT;Hits=364;Alias=PAL5A;Class=23H-RNA	TRUE
I	1151680	1151701	87	-	ID=TAACGAGACCGCTGAAAAAGTT;Hits=369;Alias=PAL5A;Class=23H-RNA	TRUE
I	1151680	1151702	73	-	ID=ATAACGAGACCGCTGAAAAAGTT;Hits=369;Alias=PAL5A;Class=23H-RNA	TRUE
I	1151681	1151702	18	-	ID=ATAACGAGACCGCTGAAAAAGT;Hits=371;Alias=PAL5A;Class=23H-RNA	TRUE
I	1151681	1151703	40	+	ID=ACTTTTTCAGCGGTCTCGTTATG;Hits=355;Alias=PAL5A;Class=23H-RNA	TRUE
I	1151681	1151703	11	-	ID=CATAACGAGACCGCTGAAAAAGT;Hits=355;Alias=PAL5A;Class=23H-RNA	TRUE
I	1151682	1151703	62	+	ID=CTTTTTCAGCGGTCTCGTTATG;Hits=356;Alias=PAL5A;Class=23H-RNA	TRUE
I	1151682	1151704	63	+	ID=CTTTTTCAGCGGTCTCGTTATGA;Hits=354;Alias=PAL5A;Class=23H-RNA	TRUE
I	1151683	1151703	13	+	ID=TTTTTCAGCGGTCTCGTTATG;Hits=368;Alias=PAL5A;Class=23H-RNA	TRUE
I	1151683	1151704	14	+	ID=TTTTTCAGCGGTCTCGTTATGA;Hits=366;Alias=PAL5A;Class=23H-RNA	TRUE
I	1151687	1151709	22	+	ID=TCAGCGGTCTCGTTATGAAAATC;Hits=354;Alias=PAL5A;Class=23H-RNA	TRUE
I	1151689	1151711	36	+	ID=AGCGGTCTCGTTATGAAAATCAG;Hits=351;Alias=PAL5A;Class=23H-RNA	TRUE
I	1151999	1152020	13	-	ID=TCACGAGGGACGAGGAAAAGTG;Hits=316;Alias=PAL5A;Class=23H-RNA	TRUE
I	1154887	1154909	11	+	ID=TACCTGATTTTCATAACGAGACC;Hits=346;Alias=PAL5A;Class=23H-RNA	TRUE
I	1154890	1154912	36	-	ID=AGCGGTCTCGTTATGAAAATCAG;Hits=351;Alias=PAL5A;Class=23H-RNA	TRUE
I	1154892	1154914	22	-	ID=TCAGCGGTCTCGTTATGAAAATC;Hits=354;Alias=PAL5A;Class=23H-RNA	TRUE
I	1154897	1154918	14	-	ID=TTTTTCAGCGGTCTCGTTATGA;Hits=366;Alias=PAL5A;Class=23H-RNA	TRUE
I	1154897	1154919	63	-	ID=CTTTTTCAGCGGTCTCGTTATGA;Hits=354;Alias=PAL5A;Class=23H-RNA	TRUE
I	1154898	1154918	13	-	ID=TTTTTCAGCGGTCTCGTTATG;Hits=368;Alias=PAL5A;Class=23H-RNA	TRUE
I	1154898	1154919	62	-	ID=CTTTTTCAGCGGTCTCGTTATG;Hits=356;Alias=PAL5A;Class=23H-RNA	TRUE
I	1154898	1154920	40	-	ID=ACTTTTTCAGCGGTCTCGTTATG;Hits=355;Alias=PAL5A;Class=23H-RNA	TRUE
I	1154898	1154920	11	+	ID=CATAACGAGACCGCTGAAAAAGT;Hits=355;Alias=PAL5A;Class=23H-RNA	TRUE
I	1154899	1154920	18	+	ID=ATAACGAGACCGCTGAAAAAGT;Hits=371;Alias=PAL5A;Class=23H-RNA	TRUE
I	1154899	1154921	73	+	ID=ATAACGAGACCGCTGAAAAAGTT;Hits=369;Alias=PAL5A;Class=23H-RNA	TRUE
I	1154900	1154921	87	+	ID=TAACGAGACCGCTGAAAAAGTT;Hits=369;Alias=PAL5A;Class=23H-RNA	TRUE
I	1154900	1154922	46	+	ID=TAACGAGACCGCTGAAAAAGTTT;Hits=364;Alias=PAL5A;Class=23H-RNA	TRUE
I	1154901	1154922	24	+	ID=AACGAGACCGCTGAAAAAGTTT;Hits=371;Alias=PAL5A;Class=23H-RNA	TRUE
I	1160983	1161004	13	+	ID=TCACGAGGGACGAGGAAAAGTG;Hits=316;Alias=PAL5A;Class=23H-RNA	TRUE
I	1161290	1161312	36	-	ID=AGCGGTCTCGTTATGAAAATCAG;Hits=351;Alias=PAL5A;Class=23H-RNA	TRUE
I	1161292	1161314	22	-	ID=TCAGCGGTCTCGTTATGAAAATC;Hits=354;Alias=PAL5A;Class=23H-RNA	TRUE
I	1161297	1161318	14	-	ID=TTTTTCAGCGGTCTCGTTATGA;Hits=366;Alias=PAL5A;Class=23H-RNA	TRUE
I	1161297	1161319	63	-	ID=CTTTTTCAGCGGTCTCGTTATGA;Hits=354;Alias=PAL5A;Class=23H-RNA	TRUE
I	1161298	1161318	13	-	ID=TTTTTCAGCGGTCTCGTTATG;Hits=368;Alias=PAL5A;Class=23H-RNA	TRUE
I	1161298	1161319	62	-	ID=CTTTTTCAGCGGTCTCGTTATG;Hits=356;Alias=PAL5A;Class=23H-RNA	TRUE
I	1161298	1161320	40	-	ID=ACTTTTTCAGCGGTCTCGTTATG;Hits=355;Alias=PAL5A;Class=23H-RNA	TRUE
I	1161298	1161320	11	+	ID=CATAACGAGACCGCTGAAAAAGT;Hits=355;Alias=PAL5A;Class=23H-RNA	TRUE
I	1161299	1161320	18	+	ID=ATAACGAGACCGCTGAAAAAGT;Hits=371;Alias=PAL5A;Class=23H-RNA	TRUE
I	1161299	1161321	73	+	ID=ATAACGAGACCGCTGAAAAAGTT;Hits=369;Alias=PAL5A;Class=23H-RNA	TRUE
I	1161300	1161321	87	+	ID=TAACGAGACCGCTGAAAAAGTT;Hits=369;Alias=PAL5A;Class=23H-RNA	TRUE
I	1161300	1161322	46	+	ID=TAACGAGACCGCTGAAAAAGTTT;Hits=364;Alias=PAL5A;Class=23H-RNA	TRUE
I	1161301	1161322	24	+	ID=AACGAGACCGCTGAAAAAGTTT;Hits=371;Alias=PAL5A;Class=23H-RNA	TRUE
I	1161399	1161420	24	-	ID=AACGAGACCGCTGAAAAAGTTT;Hits=371;Alias=PAL5A;Class=23H-RNA	TRUE
I	1161399	1161421	46	-	ID=TAACGAGACCGCTGAAAAAGTTT;Hits=364;Alias=PAL5A;Class=23H-RNA	TRUE
I	1161400	1161421	87	-	ID=TAACGAGACCGCTGAAAAAGTT;Hits=369;Alias=PAL5A;Class=23H-RNA	TRUE
I	1161400	1161422	73	-	ID=ATAACGAGACCGCTGAAAAAGTT;Hits=369;Alias=PAL5A;Class=23H-RNA	TRUE
I	1161401	1161422	18	-	ID=ATAACGAGACCGCTGAAAAAGT;Hits=371;Alias=PAL5A;Class=23H-RNA	TRUE
I	1161401	1161423	40	+	ID=ACTTTTTCAGCGGTCTCGTTATG;Hits=355;Alias=PAL5A;Class=23H-RNA	TRUE
I	1161401	1161423	11	-	ID=CATAACGAGACCGCTGAAAAAGT;Hits=355;Alias=PAL5A;Class=23H-RNA	TRUE
I	1161402	1161423	62	+	ID=CTTTTTCAGCGGTCTCGTTATG;Hits=356;Alias=PAL5A;Class=23H-RNA	TRUE
I	1161402	1161424	63	+	ID=CTTTTTCAGCGGTCTCGTTATGA;Hits=354;Alias=PAL5A;Class=23H-RNA	TRUE
I	1161403	1161423	13	+	ID=TTTTTCAGCGGTCTCGTTATG;Hits=368;Alias=PAL5A;Class=23H-RNA	TRUE
I	1161403	1161424	14	+	ID=TTTTTCAGCGGTCTCGTTATGA;Hits=366;Alias=PAL5A;Class=23H-RNA	TRUE
I	1161407	1161429	22	+	ID=TCAGCGGTCTCGTTATGAAAATC;Hits=354;Alias=PAL5A;Class=23H-RNA	TRUE
I	1161409	1161431	36	+	ID=AGCGGTCTCGTTATGAAAATCAG;Hits=351;Alias=PAL5A;Class=23H-RNA	TRUE
I	1168123	1168145	171	+	ID=TCCCGCATTTTTTGTAGATCAAA;Hits=830;Alias=CELE14B;Class=23H-RNA	TRUE
I	1168124	1168145	25	-	ID=TTTGATCTACAAAAAATGCGGG;Hits=878;Alias=CELE14B;Class=23H-RNA	TRUE
I	1168125	1168145	27	+	ID=CCGCATTTTTTGTAGATCAAA;Hits=974;Alias=CELE14B;Class=23H-RNA	TRUE
I	1168125	1168147	27	+	ID=CCGCATTTTTTGTAGATCAAACC;Hits=693;Alias=CELE14B;Class=23H-RNA	TRUE
I	1168126	1168147	6	+	ID=CGCATTTTTTGTAGATCAAACC;Hits=732;Alias=CELE14B;Class=23H-RNA	TRUE
I	1168126	1168148	53	+	ID=CGCATTTTTTGTAGATCAAACCG;Hits=649;Alias=CELE14B;Class=23H-RNA	TRUE
I	1168865	1168885	5	+	ID=TTCCCGCATTTTTTGTAGATC;Hits=922;Alias=CELE14B;Class=23H-RNA	TRUE
I	1177214	1177236	35	+	ID=TAGCGAAAACTACAGTAATTCTT;Hits=331;Alias=CELE1;Class=23H-RNA	TRUE
I	1177215	1177236	7	+	ID=AGCGAAAACTACAGTAATTCTT;Hits=384;Alias=CELE1;Class=23H-RNA	TRUE
I	1177215	1177237	13	+	ID=AGCGAAAACTACAGTAATTCTTT;Hits=342;Alias=CELE1;Class=23H-RNA	TRUE
I	1177330	1177352	13	-	ID=AGCGAAAACTACAGTAATTCTTT;Hits=342;Alias=CELE1;Class=23H-RNA	TRUE
I	1177331	1177352	7	-	ID=AGCGAAAACTACAGTAATTCTT;Hits=384;Alias=CELE1;Class=23H-RNA	TRUE
I	1177331	1177353	35	-	ID=TAGCGAAAACTACAGTAATTCTT;Hits=331;Alias=CELE1;Class=23H-RNA	TRUE
I	1178529	1178550	43	-	ID=AACAACGAAGCTCCGAAATAACG;Hits=9;Alias=PALTTAA1;Class=23H-RNA	TRUE
I	1178529	1178551	42	-	ID=TAAAGTCGATGGACGGCGAGATT;Hits=85;Alias=PALTTAA1;Class=23H-RNA	TRUE
I	1178531	1178552	10	+	ID=TCTCGCCGTCCATCGACTTTAA;Hits=86;Alias=PALTTAA1;Class=23H-RNA	TRUE
I	1178531	1178553	16	+	ID=TCTCGCCGTCCATCGACTTTAAA;Hits=86;Alias=PALTTAA1;Class=23H-RNA	TRUE
I	1179628	1179650	35	+	ID=TAGCGAAAACTACAGTAATTCTT;Hits=331;Alias=CELE1;Class=23H-RNA	TRUE
I	1179629	1179650	7	+	ID=AGCGAAAACTACAGTAATTCTT;Hits=384;Alias=CELE1;Class=23H-RNA	TRUE
I	1179629	1179651	13	+	ID=AGCGAAAACTACAGTAATTCTTT;Hits=342;Alias=CELE1;Class=23H-RNA	TRUE
I	1179754	1179776	13	-	ID=AGCGAAAACTACAGTAATTCTTT;Hits=342;Alias=CELE1;Class=23H-RNA	TRUE
I	1179755	1179776	7	-	ID=AGCGAAAACTACAGTAATTCTT;Hits=384;Alias=CELE1;Class=23H-RNA	TRUE
I	1179755	1179777	35	-	ID=TAGCGAAAACTACAGTAATTCTT;Hits=331;Alias=CELE1;Class=23H-RNA	TRUE
I	1185644	1185665	29	+	ID=CGGAAATTCGTTGATTGAGACA;Hits=26;Alias=other;Class=23H-RNA	TRUE
I	1194650	1194672	4	-	ID=CACGGTGCCAGATCCTGAAAACG;Hits=22;Alias=other;Class=23H-RNA	TRUE
I	1194854	1194876	4	+	ID=CACGGTGCCAGATCCTGAAAACG;Hits=22;Alias=other;Class=23H-RNA	TRUE
I	1198057	1198079	11	+	ID=TACCTGATTTTCATAACGAGACC;Hits=346;Alias=PAL5A;Class=23H-RNA	TRUE
I	1198060	1198082	36	-	ID=AGCGGTCTCGTTATGAAAATCAG;Hits=351;Alias=PAL5A;Class=23H-RNA	TRUE
I	1198062	1198084	22	-	ID=TCAGCGGTCTCGTTATGAAAATC;Hits=354;Alias=PAL5A;Class=23H-RNA	TRUE
I	1198067	1198088	14	-	ID=TTTTTCAGCGGTCTCGTTATGA;Hits=366;Alias=PAL5A;Class=23H-RNA	TRUE
I	1198067	1198089	63	-	ID=CTTTTTCAGCGGTCTCGTTATGA;Hits=354;Alias=PAL5A;Class=23H-RNA	TRUE
I	1198068	1198088	13	-	ID=TTTTTCAGCGGTCTCGTTATG;Hits=368;Alias=PAL5A;Class=23H-RNA	TRUE
I	1198068	1198089	62	-	ID=CTTTTTCAGCGGTCTCGTTATG;Hits=356;Alias=PAL5A;Class=23H-RNA	TRUE
I	1198068	1198090	40	-	ID=ACTTTTTCAGCGGTCTCGTTATG;Hits=355;Alias=PAL5A;Class=23H-RNA	TRUE
I	1198068	1198090	11	+	ID=CATAACGAGACCGCTGAAAAAGT;Hits=355;Alias=PAL5A;Class=23H-RNA	TRUE
I	1198069	1198090	18	+	ID=ATAACGAGACCGCTGAAAAAGT;Hits=371;Alias=PAL5A;Class=23H-RNA	TRUE
I	1198069	1198091	73	+	ID=ATAACGAGACCGCTGAAAAAGTT;Hits=369;Alias=PAL5A;Class=23H-RNA	TRUE
I	1198070	1198091	87	+	ID=TAACGAGACCGCTGAAAAAGTT;Hits=369;Alias=PAL5A;Class=23H-RNA	TRUE
I	1198070	1198092	46	+	ID=TAACGAGACCGCTGAAAAAGTTT;Hits=364;Alias=PAL5A;Class=23H-RNA	TRUE
I	1198071	1198092	24	+	ID=AACGAGACCGCTGAAAAAGTTT;Hits=371;Alias=PAL5A;Class=23H-RNA	TRUE
I	1198169	1198190	24	-	ID=AACGAGACCGCTGAAAAAGTTT;Hits=371;Alias=PAL5A;Class=23H-RNA	TRUE
I	1198169	1198191	46	-	ID=TAACGAGACCGCTGAAAAAGTTT;Hits=364;Alias=PAL5A;Class=23H-RNA	TRUE
I	1198170	1198191	87	-	ID=TAACGAGACCGCTGAAAAAGTT;Hits=369;Alias=PAL5A;Class=23H-RNA	TRUE
I	1198170	1198192	73	-	ID=ATAACGAGACCGCTGAAAAAGTT;Hits=369;Alias=PAL5A;Class=23H-RNA	TRUE
I	1198171	1198192	18	-	ID=ATAACGAGACCGCTGAAAAAGT;Hits=371;Alias=PAL5A;Class=23H-RNA	TRUE
I	1198171	1198193	40	+	ID=ACTTTTTCAGCGGTCTCGTTATG;Hits=355;Alias=PAL5A;Class=23H-RNA	TRUE
I	1198171	1198193	11	-	ID=CATAACGAGACCGCTGAAAAAGT;Hits=355;Alias=PAL5A;Class=23H-RNA	TRUE
I	1198172	1198193	62	+	ID=CTTTTTCAGCGGTCTCGTTATG;Hits=356;Alias=PAL5A;Class=23H-RNA	TRUE
I	1198172	1198194	63	+	ID=CTTTTTCAGCGGTCTCGTTATGA;Hits=354;Alias=PAL5A;Class=23H-RNA	TRUE
I	1198173	1198193	13	+	ID=TTTTTCAGCGGTCTCGTTATG;Hits=368;Alias=PAL5A;Class=23H-RNA	TRUE
I	1198173	1198194	14	+	ID=TTTTTCAGCGGTCTCGTTATGA;Hits=366;Alias=PAL5A;Class=23H-RNA	TRUE
I	1198177	1198199	22	+	ID=TCAGCGGTCTCGTTATGAAAATC;Hits=354;Alias=PAL5A;Class=23H-RNA	TRUE
I	1198179	1198201	36	+	ID=AGCGGTCTCGTTATGAAAATCAG;Hits=351;Alias=PAL5A;Class=23H-RNA	TRUE
I	1206505	1206526	13	+	ID=TCACGAGGGACGAGGAAAAGTG;Hits=316;Alias=PAL5A;Class=23H-RNA	TRUE
I	1206811	1206833	11	+	ID=TACCTGATTTTCATAACGAGACC;Hits=346;Alias=PAL5A;Class=23H-RNA	TRUE
I	1206814	1206836	36	-	ID=AGCGGTCTCGTTATGAAAATCAG;Hits=351;Alias=PAL5A;Class=23H-RNA	TRUE
I	1206816	1206838	22	-	ID=TCAGCGGTCTCGTTATGAAAATC;Hits=354;Alias=PAL5A;Class=23H-RNA	TRUE
I	1206821	1206842	14	-	ID=TTTTTCAGCGGTCTCGTTATGA;Hits=366;Alias=PAL5A;Class=23H-RNA	TRUE
I	1206821	1206843	63	-	ID=CTTTTTCAGCGGTCTCGTTATGA;Hits=354;Alias=PAL5A;Class=23H-RNA	TRUE
I	1206822	1206842	13	-	ID=TTTTTCAGCGGTCTCGTTATG;Hits=368;Alias=PAL5A;Class=23H-RNA	TRUE
I	1206822	1206843	62	-	ID=CTTTTTCAGCGGTCTCGTTATG;Hits=356;Alias=PAL5A;Class=23H-RNA	TRUE
I	1206822	1206844	40	-	ID=ACTTTTTCAGCGGTCTCGTTATG;Hits=355;Alias=PAL5A;Class=23H-RNA	TRUE
I	1206822	1206844	11	+	ID=CATAACGAGACCGCTGAAAAAGT;Hits=355;Alias=PAL5A;Class=23H-RNA	TRUE
I	1206823	1206844	18	+	ID=ATAACGAGACCGCTGAAAAAGT;Hits=371;Alias=PAL5A;Class=23H-RNA	TRUE
I	1206823	1206845	73	+	ID=ATAACGAGACCGCTGAAAAAGTT;Hits=369;Alias=PAL5A;Class=23H-RNA	TRUE
I	1206824	1206845	87	+	ID=TAACGAGACCGCTGAAAAAGTT;Hits=369;Alias=PAL5A;Class=23H-RNA	TRUE
I	1206824	1206846	46	+	ID=TAACGAGACCGCTGAAAAAGTTT;Hits=364;Alias=PAL5A;Class=23H-RNA	TRUE
I	1206825	1206846	24	+	ID=AACGAGACCGCTGAAAAAGTTT;Hits=371;Alias=PAL5A;Class=23H-RNA	TRUE
I	1206923	1206944	24	-	ID=AACGAGACCGCTGAAAAAGTTT;Hits=371;Alias=PAL5A;Class=23H-RNA	TRUE
I	1206923	1206945	46	-	ID=TAACGAGACCGCTGAAAAAGTTT;Hits=364;Alias=PAL5A;Class=23H-RNA	TRUE
I	1206924	1206945	87	-	ID=TAACGAGACCGCTGAAAAAGTT;Hits=369;Alias=PAL5A;Class=23H-RNA	TRUE
I	1206924	1206946	73	-	ID=ATAACGAGACCGCTGAAAAAGTT;Hits=369;Alias=PAL5A;Class=23H-RNA	TRUE
I	1206925	1206946	18	-	ID=ATAACGAGACCGCTGAAAAAGT;Hits=371;Alias=PAL5A;Class=23H-RNA	TRUE
I	1206925	1206947	40	+	ID=ACTTTTTCAGCGGTCTCGTTATG;Hits=355;Alias=PAL5A;Class=23H-RNA	TRUE
I	1206925	1206947	11	-	ID=CATAACGAGACCGCTGAAAAAGT;Hits=355;Alias=PAL5A;Class=23H-RNA	TRUE
I	1206926	1206947	62	+	ID=CTTTTTCAGCGGTCTCGTTATG;Hits=356;Alias=PAL5A;Class=23H-RNA	TRUE
I	1206926	1206948	63	+	ID=CTTTTTCAGCGGTCTCGTTATGA;Hits=354;Alias=PAL5A;Class=23H-RNA	TRUE
I	1206927	1206947	13	+	ID=TTTTTCAGCGGTCTCGTTATG;Hits=368;Alias=PAL5A;Class=23H-RNA	TRUE
I	1206927	1206948	14	+	ID=TTTTTCAGCGGTCTCGTTATGA;Hits=366;Alias=PAL5A;Class=23H-RNA	TRUE
I	1206931	1206953	22	+	ID=TCAGCGGTCTCGTTATGAAAATC;Hits=354;Alias=PAL5A;Class=23H-RNA	TRUE
I	1206933	1206955	36	+	ID=AGCGGTCTCGTTATGAAAATCAG;Hits=351;Alias=PAL5A;Class=23H-RNA	TRUE
I	1211159	1211179	27	-	ID=CCGCATTTTTTGTAGATCAAA;Hits=974;Alias=CELE14B;Class=23H-RNA	TRUE
I	1211159	1211181	171	-	ID=TCCCGCATTTTTTGTAGATCAAA;Hits=830;Alias=CELE14B;Class=23H-RNA	TRUE
I	1211160	1211181	78	-	ID=TCCCGCATTTTTTGTAGATCAA;Hits=1072;Alias=CELE14B;Class=23H-RNA	TRUE
I	1211161	1211182	15	-	ID=TTCCCGCATTTTTTGTAGATCA;Hits=857;Alias=CELE14B;Class=23H-RNA	TRUE
I	1211161	1211183	76	+	ID=TGATCTACAAAAAATGCGGGAAT;Hits=762;Alias=CELE14B;Class=23H-RNA	TRUE
I	1211161	1211184	23	+	ID=TGATCTACAAAAAATGCGGGAATT;Hits=693;Alias=CELE14B;Class=23H-RNA	TRUE
I	1211162	1211182	5	-	ID=TTCCCGCATTTTTTGTAGATC;Hits=922;Alias=CELE14B;Class=23H-RNA	TRUE
I	1214734	1214756	53	-	ID=CGCATTTTTTGTAGATCAAACCG;Hits=649;Alias=CELE14B;Class=23H-RNA	TRUE
I	1214735	1214756	6	-	ID=CGCATTTTTTGTAGATCAAACC;Hits=732;Alias=CELE14B;Class=23H-RNA	TRUE
I	1214735	1214757	27	-	ID=CCGCATTTTTTGTAGATCAAACC;Hits=693;Alias=CELE14B;Class=23H-RNA	TRUE
I	1214737	1214757	27	-	ID=CCGCATTTTTTGTAGATCAAA;Hits=974;Alias=CELE14B;Class=23H-RNA	TRUE
I	1214737	1214758	25	+	ID=TTTGATCTACAAAAAATGCGGG;Hits=878;Alias=CELE14B;Class=23H-RNA	TRUE
I	1214737	1214759	171	-	ID=TCCCGCATTTTTTGTAGATCAAA;Hits=830;Alias=CELE14B;Class=23H-RNA	TRUE
I	1216216	1216236	5	-	ID=ATGATTTATTGTTCCCGTAAT;Hits=54;Alias=PALTA4;Class=23H-RNA	TRUE
I	1216216	1216238	7	-	ID=TCATGATTTATTGTTCCCGTAAT;Hits=53;Alias=PALTA4;Class=23H-RNA	TRUE
I	1216283	1216305	52	+	ID=TAGCGAAAACTACAGTAAGAACT;Hits=37;Alias=PALTA4;Class=23H-RNA	TRUE
I	1216284	1216305	16	+	ID=AGCGAAAACTACAGTAAGAACT;Hits=38;Alias=PALTA4;Class=23H-RNA	TRUE
I	1216335	1216356	16	-	ID=AGCGAAAACTACAGTAAGAACT;Hits=38;Alias=PALTA4;Class=23H-RNA	TRUE
I	1216335	1216357	52	-	ID=TAGCGAAAACTACAGTAAGAACT;Hits=37;Alias=PALTA4;Class=23H-RNA	TRUE
I	1216337	1216359	32	+	ID=TTCTTACTGTAGTTTTCGCTAAG;Hits=36;Alias=PALTA4;Class=23H-RNA	TRUE
I	1216338	1216359	12	+	ID=TCTTACTGTAGTTTTCGCTAAG;Hits=59;Alias=PALTA4;Class=23H-RNA	TRUE
I	1216338	1216360	20	+	ID=TCTTACTGTAGTTTTCGCTAAGA;Hits=58;Alias=PALTA4;Class=23H-RNA	TRUE
I	1216763	1216785	11	+	ID=TACCTGATTTTCATAACGAGACC;Hits=346;Alias=PAL5A;Class=23H-RNA	TRUE
I	1216766	1216788	36	-	ID=AGCGGTCTCGTTATGAAAATCAG;Hits=351;Alias=PAL5A;Class=23H-RNA	TRUE
I	1216768	1216790	22	-	ID=TCAGCGGTCTCGTTATGAAAATC;Hits=354;Alias=PAL5A;Class=23H-RNA	TRUE
I	1216773	1216794	14	-	ID=TTTTTCAGCGGTCTCGTTATGA;Hits=366;Alias=PAL5A;Class=23H-RNA	TRUE
I	1216773	1216795	63	-	ID=CTTTTTCAGCGGTCTCGTTATGA;Hits=354;Alias=PAL5A;Class=23H-RNA	TRUE
I	1216774	1216794	13	-	ID=TTTTTCAGCGGTCTCGTTATG;Hits=368;Alias=PAL5A;Class=23H-RNA	TRUE
I	1216774	1216795	62	-	ID=CTTTTTCAGCGGTCTCGTTATG;Hits=356;Alias=PAL5A;Class=23H-RNA	TRUE
I	1216774	1216796	40	-	ID=ACTTTTTCAGCGGTCTCGTTATG;Hits=355;Alias=PAL5A;Class=23H-RNA	TRUE
I	1216774	1216796	11	+	ID=CATAACGAGACCGCTGAAAAAGT;Hits=355;Alias=PAL5A;Class=23H-RNA	TRUE
I	1216775	1216796	18	+	ID=ATAACGAGACCGCTGAAAAAGT;Hits=371;Alias=PAL5A;Class=23H-RNA	TRUE
I	1216775	1216797	73	+	ID=ATAACGAGACCGCTGAAAAAGTT;Hits=369;Alias=PAL5A;Class=23H-RNA	TRUE
I	1216776	1216797	87	+	ID=TAACGAGACCGCTGAAAAAGTT;Hits=369;Alias=PAL5A;Class=23H-RNA	TRUE
I	1216776	1216798	46	+	ID=TAACGAGACCGCTGAAAAAGTTT;Hits=364;Alias=PAL5A;Class=23H-RNA	TRUE
I	1216777	1216798	24	+	ID=AACGAGACCGCTGAAAAAGTTT;Hits=371;Alias=PAL5A;Class=23H-RNA	TRUE
I	1216875	1216896	24	-	ID=AACGAGACCGCTGAAAAAGTTT;Hits=371;Alias=PAL5A;Class=23H-RNA	TRUE
I	1216875	1216897	46	-	ID=TAACGAGACCGCTGAAAAAGTTT;Hits=364;Alias=PAL5A;Class=23H-RNA	TRUE
I	1216876	1216897	87	-	ID=TAACGAGACCGCTGAAAAAGTT;Hits=369;Alias=PAL5A;Class=23H-RNA	TRUE
I	1216876	1216898	73	-	ID=ATAACGAGACCGCTGAAAAAGTT;Hits=369;Alias=PAL5A;Class=23H-RNA	TRUE
I	1216877	1216898	18	-	ID=ATAACGAGACCGCTGAAAAAGT;Hits=371;Alias=PAL5A;Class=23H-RNA	TRUE
I	1216877	1216899	40	+	ID=ACTTTTTCAGCGGTCTCGTTATG;Hits=355;Alias=PAL5A;Class=23H-RNA	TRUE
I	1216877	1216899	11	-	ID=CATAACGAGACCGCTGAAAAAGT;Hits=355;Alias=PAL5A;Class=23H-RNA	TRUE
I	1216878	1216899	62	+	ID=CTTTTTCAGCGGTCTCGTTATG;Hits=356;Alias=PAL5A;Class=23H-RNA	TRUE
I	1216878	1216900	63	+	ID=CTTTTTCAGCGGTCTCGTTATGA;Hits=354;Alias=PAL5A;Class=23H-RNA	TRUE
I	1216879	1216899	13	+	ID=TTTTTCAGCGGTCTCGTTATG;Hits=368;Alias=PAL5A;Class=23H-RNA	TRUE
I	1216879	1216900	14	+	ID=TTTTTCAGCGGTCTCGTTATGA;Hits=366;Alias=PAL5A;Class=23H-RNA	TRUE
I	1216883	1216905	22	+	ID=TCAGCGGTCTCGTTATGAAAATC;Hits=354;Alias=PAL5A;Class=23H-RNA	TRUE
I	1216885	1216907	36	+	ID=AGCGGTCTCGTTATGAAAATCAG;Hits=351;Alias=PAL5A;Class=23H-RNA	TRUE
I	1216888	1216910	11	-	ID=TACCTGATTTTCATAACGAGACC;Hits=346;Alias=PAL5A;Class=23H-RNA	TRUE
I	1218056	1218078	171	+	ID=TCCCGCATTTTTTGTAGATCAAA;Hits=830;Alias=CELE14B;Class=23H-RNA	TRUE
I	1218058	1218078	27	+	ID=CCGCATTTTTTGTAGATCAAA;Hits=974;Alias=CELE14B;Class=23H-RNA	TRUE
I	1218701	1218722	6	-	ID=CGCATTTTTTGTAGATCAACGT;Hits=155;Alias=CELE14B;Class=23H-RNA	TRUE
I	1218803	1218825	171	+	ID=TCCCGCATTTTTTGTAGATCAAA;Hits=830;Alias=CELE14B;Class=23H-RNA	TRUE
I	1218804	1218825	25	-	ID=TTTGATCTACAAAAAATGCGGG;Hits=878;Alias=CELE14B;Class=23H-RNA	TRUE
I	1218805	1218825	27	+	ID=CCGCATTTTTTGTAGATCAAA;Hits=974;Alias=CELE14B;Class=23H-RNA	TRUE
I	1218805	1218827	27	+	ID=CCGCATTTTTTGTAGATCAAACC;Hits=693;Alias=CELE14B;Class=23H-RNA	TRUE
I	1218806	1218827	6	+	ID=CGCATTTTTTGTAGATCAAACC;Hits=732;Alias=CELE14B;Class=23H-RNA	TRUE
I	1218806	1218828	9	+	ID=CGCATTTTTTGTAGATCAAACCC;Hits=11;Alias=CELE14B;Class=23H-RNA	TRUE
I	1224498	1224521	11	+	ID=TACGGTTTGATCTACAAAAAATGC;Hits=344;Alias=CELE14B;Class=23H-RNA	TRUE
I	1224500	1224522	53	-	ID=CGCATTTTTTGTAGATCAAACCG;Hits=649;Alias=CELE14B;Class=23H-RNA	TRUE
I	1224501	1224522	6	-	ID=CGCATTTTTTGTAGATCAAACC;Hits=732;Alias=CELE14B;Class=23H-RNA	TRUE
I	1224501	1224523	27	-	ID=CCGCATTTTTTGTAGATCAAACC;Hits=693;Alias=CELE14B;Class=23H-RNA	TRUE
I	1224503	1224523	27	-	ID=CCGCATTTTTTGTAGATCAAA;Hits=974;Alias=CELE14B;Class=23H-RNA	TRUE
I	1224503	1224524	25	+	ID=TTTGATCTACAAAAAATGCGGG;Hits=878;Alias=CELE14B;Class=23H-RNA	TRUE
I	1224503	1224525	171	-	ID=TCCCGCATTTTTTGTAGATCAAA;Hits=830;Alias=CELE14B;Class=23H-RNA	TRUE
I	1224504	1224525	78	-	ID=TCCCGCATTTTTTGTAGATCAA;Hits=1072;Alias=CELE14B;Class=23H-RNA	TRUE
I	1224505	1224526	15	-	ID=TTCCCGCATTTTTTGTAGATCA;Hits=857;Alias=CELE14B;Class=23H-RNA	TRUE
I	1224505	1224527	76	+	ID=TGATCTACAAAAAATGCGGGAAT;Hits=762;Alias=CELE14B;Class=23H-RNA	TRUE
I	1224505	1224528	23	+	ID=TGATCTACAAAAAATGCGGGAATT;Hits=693;Alias=CELE14B;Class=23H-RNA	TRUE
I	1224506	1224526	5	-	ID=TTCCCGCATTTTTTGTAGATC;Hits=922;Alias=CELE14B;Class=23H-RNA	TRUE
I	1224999	1225019	27	-	ID=CCGCATTTTTTGTAGATCAAA;Hits=974;Alias=CELE14B;Class=23H-RNA	TRUE
I	1224999	1225020	25	+	ID=TTTGATCTACAAAAAATGCGGG;Hits=878;Alias=CELE14B;Class=23H-RNA	TRUE
I	1224999	1225021	171	-	ID=TCCCGCATTTTTTGTAGATCAAA;Hits=830;Alias=CELE14B;Class=23H-RNA	TRUE
I	1225000	1225021	78	-	ID=TCCCGCATTTTTTGTAGATCAA;Hits=1072;Alias=CELE14B;Class=23H-RNA	TRUE
I	1225001	1225022	15	-	ID=TTCCCGCATTTTTTGTAGATCA;Hits=857;Alias=CELE14B;Class=23H-RNA	TRUE
I	1225001	1225023	76	+	ID=TGATCTACAAAAAATGCGGGAAT;Hits=762;Alias=CELE14B;Class=23H-RNA	TRUE
I	1225001	1225024	23	+	ID=TGATCTACAAAAAATGCGGGAATT;Hits=693;Alias=CELE14B;Class=23H-RNA	TRUE
I	1225002	1225022	5	-	ID=TTCCCGCATTTTTTGTAGATC;Hits=922;Alias=CELE14B;Class=23H-RNA	TRUE
I	1226471	1226492	6	-	ID=CGCATTTTTTGTAGATCAACGT;Hits=155;Alias=CELE14B;Class=23H-RNA	TRUE
I	1227215	1227236	6	+	ID=CGCATTTTTTGTAGATCAACGT;Hits=155;Alias=CELE14B;Class=23H-RNA	TRUE
I	1228629	1228651	83	-	ID=CCGTGATGGGACAGCCTGACACC;Hits=21;Alias=CELE14B;Class=23H-RNA	FALSE
I	1228649	1228671	53	-	ID=CGCATTTTTTGTAGATCAAACCG;Hits=649;Alias=CELE14B;Class=23H-RNA	TRUE
I	1228650	1228671	6	-	ID=CGCATTTTTTGTAGATCAAACC;Hits=732;Alias=CELE14B;Class=23H-RNA	TRUE
I	1228650	1228672	27	-	ID=CCGCATTTTTTGTAGATCAAACC;Hits=693;Alias=CELE14B;Class=23H-RNA	TRUE
I	1228652	1228672	27	-	ID=CCGCATTTTTTGTAGATCAAA;Hits=974;Alias=CELE14B;Class=23H-RNA	TRUE
I	1228652	1228673	25	+	ID=TTTGATCTACAAAAAATGCGGG;Hits=878;Alias=CELE14B;Class=23H-RNA	TRUE
I	1228652	1228674	171	-	ID=TCCCGCATTTTTTGTAGATCAAA;Hits=830;Alias=CELE14B;Class=23H-RNA	TRUE
I	1228653	1228674	78	-	ID=TCCCGCATTTTTTGTAGATCAA;Hits=1072;Alias=CELE14B;Class=23H-RNA	TRUE
I	1228654	1228676	76	+	ID=TGATCTACAAAAAATGCGGGAAT;Hits=762;Alias=CELE14B;Class=23H-RNA	TRUE
I	1231533	1231554	6	-	ID=CGCATTTTTTGTAGATCAACGT;Hits=155;Alias=CELE14B;Class=23H-RNA	TRUE
I	1233335	1233356	43	-	ID=AACAACGAAGCTCCGAAATAACG;Hits=9;Alias=PALTTAA1;Class=23H-RNA	TRUE
I	1233335	1233357	42	-	ID=TAAAGTCGATGGACGGCGAGATT;Hits=85;Alias=PALTTAA1;Class=23H-RNA	TRUE
I	1233337	1233358	10	+	ID=TCTCGCCGTCCATCGACTTTAA;Hits=86;Alias=PALTTAA1;Class=23H-RNA	TRUE
I	1233337	1233359	16	+	ID=TCTCGCCGTCCATCGACTTTAAA;Hits=86;Alias=PALTTAA1;Class=23H-RNA	TRUE
I	1244171	1244192	7	+	ID=AAATCACCGTCTAATTTTGAGT;Hits=8;Alias=other;Class=23H-RNA	TRUE
I	1244811	1244832	29	+	ID=CGGAAATTCGTTGATTGAGACA;Hits=26;Alias=other;Class=23H-RNA	TRUE
I	1245837	1245858	24	-	ID=AACGAGACCGCTGAAAAAGTTT;Hits=371;Alias=PAL5A;Class=23H-RNA	TRUE
I	1245837	1245859	46	-	ID=TAACGAGACCGCTGAAAAAGTTT;Hits=364;Alias=PAL5A;Class=23H-RNA	TRUE
I	1245838	1245859	87	-	ID=TAACGAGACCGCTGAAAAAGTT;Hits=369;Alias=PAL5A;Class=23H-RNA	TRUE
I	1245838	1245860	73	-	ID=ATAACGAGACCGCTGAAAAAGTT;Hits=369;Alias=PAL5A;Class=23H-RNA	TRUE
I	1245839	1245860	18	-	ID=ATAACGAGACCGCTGAAAAAGT;Hits=371;Alias=PAL5A;Class=23H-RNA	TRUE
I	1245839	1245861	40	+	ID=ACTTTTTCAGCGGTCTCGTTATG;Hits=355;Alias=PAL5A;Class=23H-RNA	TRUE
I	1245839	1245861	11	-	ID=CATAACGAGACCGCTGAAAAAGT;Hits=355;Alias=PAL5A;Class=23H-RNA	TRUE
I	1245840	1245861	62	+	ID=CTTTTTCAGCGGTCTCGTTATG;Hits=356;Alias=PAL5A;Class=23H-RNA	TRUE
I	1245840	1245862	63	+	ID=CTTTTTCAGCGGTCTCGTTATGA;Hits=354;Alias=PAL5A;Class=23H-RNA	TRUE
I	1245841	1245861	13	+	ID=TTTTTCAGCGGTCTCGTTATG;Hits=368;Alias=PAL5A;Class=23H-RNA	TRUE
I	1245841	1245862	14	+	ID=TTTTTCAGCGGTCTCGTTATGA;Hits=366;Alias=PAL5A;Class=23H-RNA	TRUE
I	1245845	1245867	22	+	ID=TCAGCGGTCTCGTTATGAAAATC;Hits=354;Alias=PAL5A;Class=23H-RNA	TRUE
I	1245847	1245869	36	+	ID=AGCGGTCTCGTTATGAAAATCAG;Hits=351;Alias=PAL5A;Class=23H-RNA	TRUE
I	1248592	1248613	6	-	ID=CGCATTTTTTGTAGATCAACGT;Hits=155;Alias=CELE14B;Class=23H-RNA	TRUE
I	1248677	1248700	23	-	ID=TGATCTACAAAAAATGCGGGAATT;Hits=693;Alias=CELE14B;Class=23H-RNA	TRUE
I	1248678	1248700	76	-	ID=TGATCTACAAAAAATGCGGGAAT;Hits=762;Alias=CELE14B;Class=23H-RNA	TRUE
I	1248679	1248699	5	+	ID=TTCCCGCATTTTTTGTAGATC;Hits=922;Alias=CELE14B;Class=23H-RNA	TRUE
I	1248679	1248700	15	+	ID=TTCCCGCATTTTTTGTAGATCA;Hits=857;Alias=CELE14B;Class=23H-RNA	TRUE
I	1248680	1248701	78	+	ID=TCCCGCATTTTTTGTAGATCAA;Hits=1072;Alias=CELE14B;Class=23H-RNA	TRUE
I	1248680	1248702	171	+	ID=TCCCGCATTTTTTGTAGATCAAA;Hits=830;Alias=CELE14B;Class=23H-RNA	TRUE
I	1248681	1248702	25	-	ID=TTTGATCTACAAAAAATGCGGG;Hits=878;Alias=CELE14B;Class=23H-RNA	TRUE
I	1248682	1248702	27	+	ID=CCGCATTTTTTGTAGATCAAA;Hits=974;Alias=CELE14B;Class=23H-RNA	TRUE
I	1248682	1248704	27	+	ID=CCGCATTTTTTGTAGATCAAACC;Hits=693;Alias=CELE14B;Class=23H-RNA	TRUE
I	1248683	1248704	6	+	ID=CGCATTTTTTGTAGATCAAACC;Hits=732;Alias=CELE14B;Class=23H-RNA	TRUE
I	1248683	1248705	53	+	ID=CGCATTTTTTGTAGATCAAACCG;Hits=649;Alias=CELE14B;Class=23H-RNA	TRUE
I	1248684	1248707	11	-	ID=TACGGTTTGATCTACAAAAAATGC;Hits=344;Alias=CELE14B;Class=23H-RNA	TRUE
I	1249673	1249695	36	-	ID=AGCGGTCTCGTTATGAAAATCAG;Hits=351;Alias=PAL5A;Class=23H-RNA	TRUE
I	1249675	1249697	22	-	ID=TCAGCGGTCTCGTTATGAAAATC;Hits=354;Alias=PAL5A;Class=23H-RNA	TRUE
I	1249680	1249701	14	-	ID=TTTTTCAGCGGTCTCGTTATGA;Hits=366;Alias=PAL5A;Class=23H-RNA	TRUE
I	1249680	1249702	63	-	ID=CTTTTTCAGCGGTCTCGTTATGA;Hits=354;Alias=PAL5A;Class=23H-RNA	TRUE
I	1249681	1249701	13	-	ID=TTTTTCAGCGGTCTCGTTATG;Hits=368;Alias=PAL5A;Class=23H-RNA	TRUE
I	1249681	1249702	62	-	ID=CTTTTTCAGCGGTCTCGTTATG;Hits=356;Alias=PAL5A;Class=23H-RNA	TRUE
I	1249681	1249703	40	-	ID=ACTTTTTCAGCGGTCTCGTTATG;Hits=355;Alias=PAL5A;Class=23H-RNA	TRUE
I	1249681	1249703	11	+	ID=CATAACGAGACCGCTGAAAAAGT;Hits=355;Alias=PAL5A;Class=23H-RNA	TRUE
I	1249682	1249703	18	+	ID=ATAACGAGACCGCTGAAAAAGT;Hits=371;Alias=PAL5A;Class=23H-RNA	TRUE
I	1249682	1249704	73	+	ID=ATAACGAGACCGCTGAAAAAGTT;Hits=369;Alias=PAL5A;Class=23H-RNA	TRUE
I	1249683	1249704	87	+	ID=TAACGAGACCGCTGAAAAAGTT;Hits=369;Alias=PAL5A;Class=23H-RNA	TRUE
I	1249683	1249705	46	+	ID=TAACGAGACCGCTGAAAAAGTTT;Hits=364;Alias=PAL5A;Class=23H-RNA	TRUE
I	1249684	1249705	24	+	ID=AACGAGACCGCTGAAAAAGTTT;Hits=371;Alias=PAL5A;Class=23H-RNA	TRUE
I	1249782	1249803	24	-	ID=AACGAGACCGCTGAAAAAGTTT;Hits=371;Alias=PAL5A;Class=23H-RNA	TRUE
I	1249782	1249804	46	-	ID=TAACGAGACCGCTGAAAAAGTTT;Hits=364;Alias=PAL5A;Class=23H-RNA	TRUE
I	1249783	1249804	87	-	ID=TAACGAGACCGCTGAAAAAGTT;Hits=369;Alias=PAL5A;Class=23H-RNA	TRUE
I	1249783	1249805	73	-	ID=ATAACGAGACCGCTGAAAAAGTT;Hits=369;Alias=PAL5A;Class=23H-RNA	TRUE
I	1249784	1249805	18	-	ID=ATAACGAGACCGCTGAAAAAGT;Hits=371;Alias=PAL5A;Class=23H-RNA	TRUE
I	1249784	1249806	40	+	ID=ACTTTTTCAGCGGTCTCGTTATG;Hits=355;Alias=PAL5A;Class=23H-RNA	TRUE
I	1249784	1249806	11	-	ID=CATAACGAGACCGCTGAAAAAGT;Hits=355;Alias=PAL5A;Class=23H-RNA	TRUE
I	1249785	1249806	62	+	ID=CTTTTTCAGCGGTCTCGTTATG;Hits=356;Alias=PAL5A;Class=23H-RNA	TRUE
I	1249785	1249807	63	+	ID=CTTTTTCAGCGGTCTCGTTATGA;Hits=354;Alias=PAL5A;Class=23H-RNA	TRUE
I	1249786	1249806	13	+	ID=TTTTTCAGCGGTCTCGTTATG;Hits=368;Alias=PAL5A;Class=23H-RNA	TRUE
I	1249786	1249807	14	+	ID=TTTTTCAGCGGTCTCGTTATGA;Hits=366;Alias=PAL5A;Class=23H-RNA	TRUE
I	1249790	1249812	22	+	ID=TCAGCGGTCTCGTTATGAAAATC;Hits=354;Alias=PAL5A;Class=23H-RNA	TRUE
I	1249792	1249814	36	+	ID=AGCGGTCTCGTTATGAAAATCAG;Hits=351;Alias=PAL5A;Class=23H-RNA	TRUE
I	1252753	1252775	7	-	ID=TCAAAATTTGACGGTGATTTCAA;Hits=92;Alias=PALTTAA1;Class=23H-RNA	TRUE
I	1252864	1252885	43	-	ID=AACAACGAAGCTCCGAAATAACG;Hits=9;Alias=PALTTAA1;Class=23H-RNA	TRUE
I	1252864	1252886	42	-	ID=TAAAGTCGATGGACGGCGAGATT;Hits=85;Alias=PALTTAA1;Class=23H-RNA	TRUE
I	1252866	1252887	10	+	ID=TCTCGCCGTCCATCGACTTTAA;Hits=86;Alias=PALTTAA1;Class=23H-RNA	TRUE
I	1252866	1252888	16	+	ID=TCTCGCCGTCCATCGACTTTAAA;Hits=86;Alias=PALTTAA1;Class=23H-RNA	TRUE
I	1252933	1252955	7	+	ID=TCAAAATTTGACGGTGATTTCAA;Hits=92;Alias=PALTTAA1;Class=23H-RNA	TRUE
I	1255775	1255798	23	-	ID=TGATCTACAAAAAATGCGGGAATT;Hits=693;Alias=CELE14B;Class=23H-RNA	TRUE
I	1255776	1255798	76	-	ID=TGATCTACAAAAAATGCGGGAAT;Hits=762;Alias=CELE14B;Class=23H-RNA	TRUE
I	1255777	1255797	5	+	ID=TTCCCGCATTTTTTGTAGATC;Hits=922;Alias=CELE14B;Class=23H-RNA	TRUE
I	1255777	1255798	15	+	ID=TTCCCGCATTTTTTGTAGATCA;Hits=857;Alias=CELE14B;Class=23H-RNA	TRUE
I	1255778	1255799	78	+	ID=TCCCGCATTTTTTGTAGATCAA;Hits=1072;Alias=CELE14B;Class=23H-RNA	TRUE
I	1255778	1255800	171	+	ID=TCCCGCATTTTTTGTAGATCAAA;Hits=830;Alias=CELE14B;Class=23H-RNA	TRUE
I	1255779	1255800	25	-	ID=TTTGATCTACAAAAAATGCGGG;Hits=878;Alias=CELE14B;Class=23H-RNA	TRUE
I	1255780	1255800	27	+	ID=CCGCATTTTTTGTAGATCAAA;Hits=974;Alias=CELE14B;Class=23H-RNA	TRUE
I	1255780	1255802	27	+	ID=CCGCATTTTTTGTAGATCAAACC;Hits=693;Alias=CELE14B;Class=23H-RNA	TRUE
I	1255781	1255802	6	+	ID=CGCATTTTTTGTAGATCAAACC;Hits=732;Alias=CELE14B;Class=23H-RNA	TRUE
I	1255781	1255803	53	+	ID=CGCATTTTTTGTAGATCAAACCG;Hits=649;Alias=CELE14B;Class=23H-RNA	TRUE
I	1255782	1255805	11	-	ID=TACGGTTTGATCTACAAAAAATGC;Hits=344;Alias=CELE14B;Class=23H-RNA	TRUE
I	1259123	1259143	17	-	ID=TTACCTATCGGCTTTAAATGT;Hits=87;Alias=PALTTAA3;Class=23H-RNA	TRUE
I	1259125	1259145	5	+	ID=ATTTAAAGCCGATAGGTAACC;Hits=91;Alias=PALTTAA3;Class=23H-RNA	TRUE
I	1263564	1263587	23	-	ID=TGATCTACAAAAAATGCGGGAATT;Hits=693;Alias=CELE14B;Class=23H-RNA	TRUE
I	1263565	1263587	76	-	ID=TGATCTACAAAAAATGCGGGAAT;Hits=762;Alias=CELE14B;Class=23H-RNA	TRUE
I	1263566	1263586	5	+	ID=TTCCCGCATTTTTTGTAGATC;Hits=922;Alias=CELE14B;Class=23H-RNA	TRUE
I	1263566	1263587	15	+	ID=TTCCCGCATTTTTTGTAGATCA;Hits=857;Alias=CELE14B;Class=23H-RNA	TRUE
I	1263567	1263588	78	+	ID=TCCCGCATTTTTTGTAGATCAA;Hits=1072;Alias=CELE14B;Class=23H-RNA	TRUE
I	1263567	1263589	171	+	ID=TCCCGCATTTTTTGTAGATCAAA;Hits=830;Alias=CELE14B;Class=23H-RNA	TRUE
I	1263569	1263589	27	+	ID=CCGCATTTTTTGTAGATCAAA;Hits=974;Alias=CELE14B;Class=23H-RNA	TRUE
I	1264485	1264508	11	+	ID=TACGGTTTGATCTACAAAAAATGC;Hits=344;Alias=CELE14B;Class=23H-RNA	TRUE
I	1264487	1264509	53	-	ID=CGCATTTTTTGTAGATCAAACCG;Hits=649;Alias=CELE14B;Class=23H-RNA	TRUE
I	1264488	1264509	6	-	ID=CGCATTTTTTGTAGATCAAACC;Hits=732;Alias=CELE14B;Class=23H-RNA	TRUE
I	1264488	1264510	27	-	ID=CCGCATTTTTTGTAGATCAAACC;Hits=693;Alias=CELE14B;Class=23H-RNA	TRUE
I	1264490	1264510	27	-	ID=CCGCATTTTTTGTAGATCAAA;Hits=974;Alias=CELE14B;Class=23H-RNA	TRUE
I	1264490	1264511	25	+	ID=TTTGATCTACAAAAAATGCGGG;Hits=878;Alias=CELE14B;Class=23H-RNA	TRUE
I	1264490	1264512	171	-	ID=TCCCGCATTTTTTGTAGATCAAA;Hits=830;Alias=CELE14B;Class=23H-RNA	TRUE
I	1264491	1264512	78	-	ID=TCCCGCATTTTTTGTAGATCAA;Hits=1072;Alias=CELE14B;Class=23H-RNA	TRUE
I	1264492	1264513	15	-	ID=TTCCCGCATTTTTTGTAGATCA;Hits=857;Alias=CELE14B;Class=23H-RNA	TRUE
I	1264492	1264514	76	+	ID=TGATCTACAAAAAATGCGGGAAT;Hits=762;Alias=CELE14B;Class=23H-RNA	TRUE
I	1264492	1264515	23	+	ID=TGATCTACAAAAAATGCGGGAATT;Hits=693;Alias=CELE14B;Class=23H-RNA	TRUE
I	1264493	1264513	5	-	ID=TTCCCGCATTTTTTGTAGATC;Hits=922;Alias=CELE14B;Class=23H-RNA	TRUE
I	1265032	1265055	11	+	ID=TACGGTTTGATCTACAAAAAATGC;Hits=344;Alias=CELE14B;Class=23H-RNA	TRUE
I	1265034	1265056	53	-	ID=CGCATTTTTTGTAGATCAAACCG;Hits=649;Alias=CELE14B;Class=23H-RNA	TRUE
I	1265035	1265056	6	-	ID=CGCATTTTTTGTAGATCAAACC;Hits=732;Alias=CELE14B;Class=23H-RNA	TRUE
I	1265035	1265057	27	-	ID=CCGCATTTTTTGTAGATCAAACC;Hits=693;Alias=CELE14B;Class=23H-RNA	TRUE
I	1265037	1265057	27	-	ID=CCGCATTTTTTGTAGATCAAA;Hits=974;Alias=CELE14B;Class=23H-RNA	TRUE
I	1265037	1265058	25	+	ID=TTTGATCTACAAAAAATGCGGG;Hits=878;Alias=CELE14B;Class=23H-RNA	TRUE
I	1265037	1265059	171	-	ID=TCCCGCATTTTTTGTAGATCAAA;Hits=830;Alias=CELE14B;Class=23H-RNA	TRUE
I	1265038	1265059	78	-	ID=TCCCGCATTTTTTGTAGATCAA;Hits=1072;Alias=CELE14B;Class=23H-RNA	TRUE
I	1265039	1265060	15	-	ID=TTCCCGCATTTTTTGTAGATCA;Hits=857;Alias=CELE14B;Class=23H-RNA	TRUE
I	1265039	1265061	76	+	ID=TGATCTACAAAAAATGCGGGAAT;Hits=762;Alias=CELE14B;Class=23H-RNA	TRUE
I	1265039	1265062	23	+	ID=TGATCTACAAAAAATGCGGGAATT;Hits=693;Alias=CELE14B;Class=23H-RNA	TRUE
I	1265040	1265060	5	-	ID=TTCCCGCATTTTTTGTAGATC;Hits=922;Alias=CELE14B;Class=23H-RNA	TRUE
I	1265705	1265726	6	-	ID=CGCATTTTTTGTAGATCAACGT;Hits=155;Alias=CELE14B;Class=23H-RNA	TRUE
I	1265791	1265813	76	-	ID=TGATCTACAAAAAATGCGGGAAT;Hits=762;Alias=CELE14B;Class=23H-RNA	TRUE
I	1265792	1265812	5	+	ID=TTCCCGCATTTTTTGTAGATC;Hits=922;Alias=CELE14B;Class=23H-RNA	TRUE
I	1265792	1265813	15	+	ID=TTCCCGCATTTTTTGTAGATCA;Hits=857;Alias=CELE14B;Class=23H-RNA	TRUE
I	1265793	1265814	78	+	ID=TCCCGCATTTTTTGTAGATCAA;Hits=1072;Alias=CELE14B;Class=23H-RNA	TRUE
I	1265816	1265838	83	+	ID=CCGTGATGGGACAGCCTGACACC;Hits=21;Alias=CELE14B;Class=23H-RNA	FALSE
I	1268429	1268452	23	-	ID=TGATCTACAAAAAATGCGGGAATT;Hits=693;Alias=CELE14B;Class=23H-RNA	TRUE
I	1268430	1268452	76	-	ID=TGATCTACAAAAAATGCGGGAAT;Hits=762;Alias=CELE14B;Class=23H-RNA	TRUE
I	1268431	1268451	5	+	ID=TTCCCGCATTTTTTGTAGATC;Hits=922;Alias=CELE14B;Class=23H-RNA	TRUE
I	1268431	1268452	15	+	ID=TTCCCGCATTTTTTGTAGATCA;Hits=857;Alias=CELE14B;Class=23H-RNA	TRUE
I	1268432	1268453	78	+	ID=TCCCGCATTTTTTGTAGATCAA;Hits=1072;Alias=CELE14B;Class=23H-RNA	TRUE
I	1268432	1268454	171	+	ID=TCCCGCATTTTTTGTAGATCAAA;Hits=830;Alias=CELE14B;Class=23H-RNA	TRUE
I	1268433	1268454	25	-	ID=TTTGATCTACAAAAAATGCGGG;Hits=878;Alias=CELE14B;Class=23H-RNA	TRUE
I	1268434	1268454	27	+	ID=CCGCATTTTTTGTAGATCAAA;Hits=974;Alias=CELE14B;Class=23H-RNA	TRUE
I	1268434	1268456	27	+	ID=CCGCATTTTTTGTAGATCAAACC;Hits=693;Alias=CELE14B;Class=23H-RNA	TRUE
I	1268435	1268456	6	+	ID=CGCATTTTTTGTAGATCAAACC;Hits=732;Alias=CELE14B;Class=23H-RNA	TRUE
I	1268435	1268457	53	+	ID=CGCATTTTTTGTAGATCAAACCG;Hits=649;Alias=CELE14B;Class=23H-RNA	TRUE
I	1269553	1269576	11	-	ID=TACGGTTTGATCTACAAAAAATGC;Hits=344;Alias=CELE14B;Class=23H-RNA	TRUE
I	1272353	1272374	6	+	ID=CGCATTTTTTGTAGATCAAACC;Hits=732;Alias=CELE14B;Class=23H-RNA	TRUE
I	1272354	1272377	11	-	ID=TACGGTTTGATCTACAAAAAATGC;Hits=344;Alias=CELE14B;Class=23H-RNA	TRUE
I	1281715	1281736	6	-	ID=CGCATTTTTTGTAGATCAACGT;Hits=155;Alias=CELE14B;Class=23H-RNA	TRUE
I	1281718	1281739	78	-	ID=TCCCGCATTTTTTGTAGATCAA;Hits=1072;Alias=CELE14B;Class=23H-RNA	TRUE
I	1281719	1281740	15	-	ID=TTCCCGCATTTTTTGTAGATCA;Hits=857;Alias=CELE14B;Class=23H-RNA	TRUE
I	1281719	1281741	76	+	ID=TGATCTACAAAAAATGCGGGAAT;Hits=762;Alias=CELE14B;Class=23H-RNA	TRUE
I	1281720	1281740	5	-	ID=TTCCCGCATTTTTTGTAGATC;Hits=922;Alias=CELE14B;Class=23H-RNA	TRUE
I	1282404	1282424	27	-	ID=CCGCATTTTTTGTAGATCAAA;Hits=974;Alias=CELE14B;Class=23H-RNA	TRUE
I	1282404	1282426	171	-	ID=TCCCGCATTTTTTGTAGATCAAA;Hits=830;Alias=CELE14B;Class=23H-RNA	TRUE
I	1282599	1282621	76	-	ID=TGATCTACAAAAAATGCGGGAAT;Hits=762;Alias=CELE14B;Class=23H-RNA	TRUE
I	1282601	1282622	78	+	ID=TCCCGCATTTTTTGTAGATCAA;Hits=1072;Alias=CELE14B;Class=23H-RNA	TRUE
I	1289256	1289277	25	-	ID=TTTGATCTACAAAAAATGCGGG;Hits=878;Alias=CELE14B;Class=23H-RNA	TRUE
I	1289258	1289279	6	+	ID=CGCATTTTTTGTAGATCAAACC;Hits=732;Alias=CELE14B;Class=23H-RNA	TRUE
I	1289258	1289280	53	+	ID=CGCATTTTTTGTAGATCAAACCG;Hits=649;Alias=CELE14B;Class=23H-RNA	TRUE
I	1290196	1290218	53	-	ID=CGCATTTTTTGTAGATCAAACCG;Hits=649;Alias=CELE14B;Class=23H-RNA	TRUE
I	1290197	1290218	6	-	ID=CGCATTTTTTGTAGATCAAACC;Hits=732;Alias=CELE14B;Class=23H-RNA	TRUE
I	1290197	1290219	27	-	ID=CCGCATTTTTTGTAGATCAAACC;Hits=693;Alias=CELE14B;Class=23H-RNA	TRUE
I	1290199	1290219	27	-	ID=CCGCATTTTTTGTAGATCAAA;Hits=974;Alias=CELE14B;Class=23H-RNA	TRUE
I	1290199	1290220	25	+	ID=TTTGATCTACAAAAAATGCGGG;Hits=878;Alias=CELE14B;Class=23H-RNA	TRUE
I	1290199	1290221	171	-	ID=TCCCGCATTTTTTGTAGATCAAA;Hits=830;Alias=CELE14B;Class=23H-RNA	TRUE
I	1305119	1305139	5	-	ID=TTCCCGCATTTTTTGTAGATC;Hits=922;Alias=CELE14B;Class=23H-RNA	TRUE
I	1305203	1305226	23	-	ID=TGATCTACAAAAAATGCGGGAATT;Hits=693;Alias=CELE14B;Class=23H-RNA	TRUE
I	1305204	1305226	76	-	ID=TGATCTACAAAAAATGCGGGAAT;Hits=762;Alias=CELE14B;Class=23H-RNA	TRUE
I	1305205	1305225	5	+	ID=TTCCCGCATTTTTTGTAGATC;Hits=922;Alias=CELE14B;Class=23H-RNA	TRUE
I	1305205	1305226	15	+	ID=TTCCCGCATTTTTTGTAGATCA;Hits=857;Alias=CELE14B;Class=23H-RNA	TRUE
I	1305206	1305227	78	+	ID=TCCCGCATTTTTTGTAGATCAA;Hits=1072;Alias=CELE14B;Class=23H-RNA	TRUE
I	1305206	1305228	171	+	ID=TCCCGCATTTTTTGTAGATCAAA;Hits=830;Alias=CELE14B;Class=23H-RNA	TRUE
I	1305207	1305228	25	-	ID=TTTGATCTACAAAAAATGCGGG;Hits=878;Alias=CELE14B;Class=23H-RNA	TRUE
I	1305208	1305228	27	+	ID=CCGCATTTTTTGTAGATCAAA;Hits=974;Alias=CELE14B;Class=23H-RNA	TRUE
I	1305208	1305230	27	+	ID=CCGCATTTTTTGTAGATCAAACC;Hits=693;Alias=CELE14B;Class=23H-RNA	TRUE
I	1305209	1305230	6	+	ID=CGCATTTTTTGTAGATCAAACC;Hits=732;Alias=CELE14B;Class=23H-RNA	TRUE
I	1306205	1306227	83	-	ID=CCGTGATGGGACAGCCTGACACC;Hits=21;Alias=CELE14B;Class=23H-RNA	FALSE
I	1306225	1306247	53	-	ID=CGCATTTTTTGTAGATCAAACCG;Hits=649;Alias=CELE14B;Class=23H-RNA	TRUE
I	1306226	1306247	6	-	ID=CGCATTTTTTGTAGATCAAACC;Hits=732;Alias=CELE14B;Class=23H-RNA	TRUE
I	1306226	1306248	27	-	ID=CCGCATTTTTTGTAGATCAAACC;Hits=693;Alias=CELE14B;Class=23H-RNA	TRUE
I	1306228	1306248	27	-	ID=CCGCATTTTTTGTAGATCAAA;Hits=974;Alias=CELE14B;Class=23H-RNA	TRUE
I	1306228	1306249	25	+	ID=TTTGATCTACAAAAAATGCGGG;Hits=878;Alias=CELE14B;Class=23H-RNA	TRUE
I	1306228	1306250	171	-	ID=TCCCGCATTTTTTGTAGATCAAA;Hits=830;Alias=CELE14B;Class=23H-RNA	TRUE
I	1306229	1306250	78	-	ID=TCCCGCATTTTTTGTAGATCAA;Hits=1072;Alias=CELE14B;Class=23H-RNA	TRUE
I	1306230	1306251	15	-	ID=TTCCCGCATTTTTTGTAGATCA;Hits=857;Alias=CELE14B;Class=23H-RNA	TRUE
I	1306230	1306252	76	+	ID=TGATCTACAAAAAATGCGGGAAT;Hits=762;Alias=CELE14B;Class=23H-RNA	TRUE
I	1306230	1306253	23	+	ID=TGATCTACAAAAAATGCGGGAATT;Hits=693;Alias=CELE14B;Class=23H-RNA	TRUE
I	1306231	1306251	5	-	ID=TTCCCGCATTTTTTGTAGATC;Hits=922;Alias=CELE14B;Class=23H-RNA	TRUE
I	1310758	1310779	78	+	ID=TCCCGCATTTTTTGTAGATCAA;Hits=1072;Alias=CELE14B;Class=23H-RNA	TRUE
I	1310758	1310780	171	+	ID=TCCCGCATTTTTTGTAGATCAAA;Hits=830;Alias=CELE14B;Class=23H-RNA	TRUE
I	1310759	1310780	25	-	ID=TTTGATCTACAAAAAATGCGGG;Hits=878;Alias=CELE14B;Class=23H-RNA	TRUE
I	1310760	1310780	27	+	ID=CCGCATTTTTTGTAGATCAAA;Hits=974;Alias=CELE14B;Class=23H-RNA	TRUE
I	1310760	1310782	27	+	ID=CCGCATTTTTTGTAGATCAAACC;Hits=693;Alias=CELE14B;Class=23H-RNA	TRUE
I	1310761	1310782	6	+	ID=CGCATTTTTTGTAGATCAAACC;Hits=732;Alias=CELE14B;Class=23H-RNA	TRUE
I	1310761	1310783	53	+	ID=CGCATTTTTTGTAGATCAAACCG;Hits=649;Alias=CELE14B;Class=23H-RNA	TRUE
I	1310762	1310785	11	-	ID=TACGGTTTGATCTACAAAAAATGC;Hits=344;Alias=CELE14B;Class=23H-RNA	TRUE
I	1314543	1314566	23	-	ID=TGATCTACAAAAAATGCGGGAATT;Hits=693;Alias=CELE14B;Class=23H-RNA	TRUE
I	1314544	1314566	76	-	ID=TGATCTACAAAAAATGCGGGAAT;Hits=762;Alias=CELE14B;Class=23H-RNA	TRUE
I	1314545	1314565	5	+	ID=TTCCCGCATTTTTTGTAGATC;Hits=922;Alias=CELE14B;Class=23H-RNA	TRUE
I	1314545	1314566	15	+	ID=TTCCCGCATTTTTTGTAGATCA;Hits=857;Alias=CELE14B;Class=23H-RNA	TRUE
I	1314546	1314567	78	+	ID=TCCCGCATTTTTTGTAGATCAA;Hits=1072;Alias=CELE14B;Class=23H-RNA	TRUE
I	1314546	1314568	171	+	ID=TCCCGCATTTTTTGTAGATCAAA;Hits=830;Alias=CELE14B;Class=23H-RNA	TRUE
I	1314547	1314568	25	-	ID=TTTGATCTACAAAAAATGCGGG;Hits=878;Alias=CELE14B;Class=23H-RNA	TRUE
I	1314548	1314568	27	+	ID=CCGCATTTTTTGTAGATCAAA;Hits=974;Alias=CELE14B;Class=23H-RNA	TRUE
I	1314548	1314570	27	+	ID=CCGCATTTTTTGTAGATCAAACC;Hits=693;Alias=CELE14B;Class=23H-RNA	TRUE
I	1314549	1314570	6	+	ID=CGCATTTTTTGTAGATCAAACC;Hits=732;Alias=CELE14B;Class=23H-RNA	TRUE
I	1314549	1314571	53	+	ID=CGCATTTTTTGTAGATCAAACCG;Hits=649;Alias=CELE14B;Class=23H-RNA	TRUE
I	1314550	1314573	11	-	ID=TACGGTTTGATCTACAAAAAATGC;Hits=344;Alias=CELE14B;Class=23H-RNA	TRUE
I	1319695	1319718	23	-	ID=TGATCTACAAAAAATGCGGGAATT;Hits=693;Alias=CELE14B;Class=23H-RNA	TRUE
I	1319696	1319718	76	-	ID=TGATCTACAAAAAATGCGGGAAT;Hits=762;Alias=CELE14B;Class=23H-RNA	TRUE
I	1319697	1319717	5	+	ID=TTCCCGCATTTTTTGTAGATC;Hits=922;Alias=CELE14B;Class=23H-RNA	TRUE
I	1319697	1319718	15	+	ID=TTCCCGCATTTTTTGTAGATCA;Hits=857;Alias=CELE14B;Class=23H-RNA	TRUE
I	1319698	1319719	78	+	ID=TCCCGCATTTTTTGTAGATCAA;Hits=1072;Alias=CELE14B;Class=23H-RNA	TRUE
I	1319698	1319720	171	+	ID=TCCCGCATTTTTTGTAGATCAAA;Hits=830;Alias=CELE14B;Class=23H-RNA	TRUE
I	1319699	1319720	25	-	ID=TTTGATCTACAAAAAATGCGGG;Hits=878;Alias=CELE14B;Class=23H-RNA	TRUE
I	1319700	1319720	27	+	ID=CCGCATTTTTTGTAGATCAAA;Hits=974;Alias=CELE14B;Class=23H-RNA	TRUE
I	1319700	1319722	27	+	ID=CCGCATTTTTTGTAGATCAAACC;Hits=693;Alias=CELE14B;Class=23H-RNA	TRUE
I	1319701	1319722	6	+	ID=CGCATTTTTTGTAGATCAAACC;Hits=732;Alias=CELE14B;Class=23H-RNA	TRUE
I	1319701	1319723	53	+	ID=CGCATTTTTTGTAGATCAAACCG;Hits=649;Alias=CELE14B;Class=23H-RNA	TRUE
I	1319702	1319725	11	-	ID=TACGGTTTGATCTACAAAAAATGC;Hits=344;Alias=CELE14B;Class=23H-RNA	TRUE
I	1321229	1321251	76	-	ID=TGATCTACAAAAAATGCGGGAAT;Hits=762;Alias=CELE14B;Class=23H-RNA	TRUE
I	1321231	1321252	78	+	ID=TCCCGCATTTTTTGTAGATCAA;Hits=1072;Alias=CELE14B;Class=23H-RNA	TRUE
I	1321231	1321253	171	+	ID=TCCCGCATTTTTTGTAGATCAAA;Hits=830;Alias=CELE14B;Class=23H-RNA	TRUE
I	1321232	1321253	25	-	ID=TTTGATCTACAAAAAATGCGGG;Hits=878;Alias=CELE14B;Class=23H-RNA	TRUE
I	1321233	1321253	27	+	ID=CCGCATTTTTTGTAGATCAAA;Hits=974;Alias=CELE14B;Class=23H-RNA	TRUE
I	1321609	1321632	11	+	ID=TACGGTTTGATCTACAAAAAATGC;Hits=344;Alias=CELE14B;Class=23H-RNA	TRUE
I	1321611	1321633	53	-	ID=CGCATTTTTTGTAGATCAAACCG;Hits=649;Alias=CELE14B;Class=23H-RNA	TRUE
I	1321612	1321633	6	-	ID=CGCATTTTTTGTAGATCAAACC;Hits=732;Alias=CELE14B;Class=23H-RNA	TRUE
I	1321612	1321634	27	-	ID=CCGCATTTTTTGTAGATCAAACC;Hits=693;Alias=CELE14B;Class=23H-RNA	TRUE
I	1321614	1321634	27	-	ID=CCGCATTTTTTGTAGATCAAA;Hits=974;Alias=CELE14B;Class=23H-RNA	TRUE
I	1321614	1321635	25	+	ID=TTTGATCTACAAAAAATGCGGG;Hits=878;Alias=CELE14B;Class=23H-RNA	TRUE
I	1321614	1321636	171	-	ID=TCCCGCATTTTTTGTAGATCAAA;Hits=830;Alias=CELE14B;Class=23H-RNA	TRUE
I	1321615	1321636	78	-	ID=TCCCGCATTTTTTGTAGATCAA;Hits=1072;Alias=CELE14B;Class=23H-RNA	TRUE
I	1321616	1321637	15	-	ID=TTCCCGCATTTTTTGTAGATCA;Hits=857;Alias=CELE14B;Class=23H-RNA	TRUE
I	1321616	1321638	76	+	ID=TGATCTACAAAAAATGCGGGAAT;Hits=762;Alias=CELE14B;Class=23H-RNA	TRUE
I	1321616	1321639	23	+	ID=TGATCTACAAAAAATGCGGGAATT;Hits=693;Alias=CELE14B;Class=23H-RNA	TRUE
I	1321617	1321637	5	-	ID=TTCCCGCATTTTTTGTAGATC;Hits=922;Alias=CELE14B;Class=23H-RNA	TRUE
I	1324286	1324309	23	-	ID=TGATCTACAAAAAATGCGGGAATT;Hits=693;Alias=CELE14B;Class=23H-RNA	TRUE
I	1324287	1324309	76	-	ID=TGATCTACAAAAAATGCGGGAAT;Hits=762;Alias=CELE14B;Class=23H-RNA	TRUE
I	1324288	1324308	5	+	ID=TTCCCGCATTTTTTGTAGATC;Hits=922;Alias=CELE14B;Class=23H-RNA	TRUE
I	1324288	1324309	15	+	ID=TTCCCGCATTTTTTGTAGATCA;Hits=857;Alias=CELE14B;Class=23H-RNA	TRUE
I	1324289	1324310	78	+	ID=TCCCGCATTTTTTGTAGATCAA;Hits=1072;Alias=CELE14B;Class=23H-RNA	TRUE
I	1324289	1324311	171	+	ID=TCCCGCATTTTTTGTAGATCAAA;Hits=830;Alias=CELE14B;Class=23H-RNA	TRUE
I	1324290	1324311	25	-	ID=TTTGATCTACAAAAAATGCGGG;Hits=878;Alias=CELE14B;Class=23H-RNA	TRUE
I	1324291	1324311	27	+	ID=CCGCATTTTTTGTAGATCAAA;Hits=974;Alias=CELE14B;Class=23H-RNA	TRUE
I	1324291	1324313	27	+	ID=CCGCATTTTTTGTAGATCAAACC;Hits=693;Alias=CELE14B;Class=23H-RNA	TRUE
I	1324292	1324313	6	+	ID=CGCATTTTTTGTAGATCAAACC;Hits=732;Alias=CELE14B;Class=23H-RNA	TRUE
I	1324292	1324314	53	+	ID=CGCATTTTTTGTAGATCAAACCG;Hits=649;Alias=CELE14B;Class=23H-RNA	TRUE
I	1324293	1324316	11	-	ID=TACGGTTTGATCTACAAAAAATGC;Hits=344;Alias=CELE14B;Class=23H-RNA	TRUE
I	1342932	1342953	6	-	ID=CGCATTTTTTGTAGATCAACGT;Hits=155;Alias=CELE14B;Class=23H-RNA	TRUE
I	1345053	1345076	23	-	ID=TGATCTACAAAAAATGCGGGAATT;Hits=693;Alias=CELE14B;Class=23H-RNA	TRUE
I	1345054	1345076	76	-	ID=TGATCTACAAAAAATGCGGGAAT;Hits=762;Alias=CELE14B;Class=23H-RNA	TRUE
I	1345055	1345075	5	+	ID=TTCCCGCATTTTTTGTAGATC;Hits=922;Alias=CELE14B;Class=23H-RNA	TRUE
I	1345055	1345076	15	+	ID=TTCCCGCATTTTTTGTAGATCA;Hits=857;Alias=CELE14B;Class=23H-RNA	TRUE
I	1345056	1345077	78	+	ID=TCCCGCATTTTTTGTAGATCAA;Hits=1072;Alias=CELE14B;Class=23H-RNA	TRUE
I	1345056	1345078	171	+	ID=TCCCGCATTTTTTGTAGATCAAA;Hits=830;Alias=CELE14B;Class=23H-RNA	TRUE
I	1345057	1345078	25	-	ID=TTTGATCTACAAAAAATGCGGG;Hits=878;Alias=CELE14B;Class=23H-RNA	TRUE
I	1345058	1345078	27	+	ID=CCGCATTTTTTGTAGATCAAA;Hits=974;Alias=CELE14B;Class=23H-RNA	TRUE
I	1345058	1345080	27	+	ID=CCGCATTTTTTGTAGATCAAACC;Hits=693;Alias=CELE14B;Class=23H-RNA	TRUE
I	1345059	1345080	6	+	ID=CGCATTTTTTGTAGATCAAACC;Hits=732;Alias=CELE14B;Class=23H-RNA	TRUE
I	1345059	1345081	53	+	ID=CGCATTTTTTGTAGATCAAACCG;Hits=649;Alias=CELE14B;Class=23H-RNA	TRUE
I	1345060	1345083	11	-	ID=TACGGTTTGATCTACAAAAAATGC;Hits=344;Alias=CELE14B;Class=23H-RNA	TRUE
I	1348078	1348099	24	-	ID=AACGAGACCGCTGAAAAAGTTT;Hits=371;Alias=PAL5A;Class=23H-RNA	TRUE
I	1348078	1348100	46	-	ID=TAACGAGACCGCTGAAAAAGTTT;Hits=364;Alias=PAL5A;Class=23H-RNA	TRUE
I	1348079	1348100	87	-	ID=TAACGAGACCGCTGAAAAAGTT;Hits=369;Alias=PAL5A;Class=23H-RNA	TRUE
I	1348079	1348101	73	-	ID=ATAACGAGACCGCTGAAAAAGTT;Hits=369;Alias=PAL5A;Class=23H-RNA	TRUE
I	1348080	1348101	18	-	ID=ATAACGAGACCGCTGAAAAAGT;Hits=371;Alias=PAL5A;Class=23H-RNA	TRUE
I	1348080	1348102	40	+	ID=ACTTTTTCAGCGGTCTCGTTATG;Hits=355;Alias=PAL5A;Class=23H-RNA	TRUE
I	1348080	1348102	11	-	ID=CATAACGAGACCGCTGAAAAAGT;Hits=355;Alias=PAL5A;Class=23H-RNA	TRUE
I	1348081	1348102	62	+	ID=CTTTTTCAGCGGTCTCGTTATG;Hits=356;Alias=PAL5A;Class=23H-RNA	TRUE
I	1348081	1348103	63	+	ID=CTTTTTCAGCGGTCTCGTTATGA;Hits=354;Alias=PAL5A;Class=23H-RNA	TRUE
I	1348082	1348102	13	+	ID=TTTTTCAGCGGTCTCGTTATG;Hits=368;Alias=PAL5A;Class=23H-RNA	TRUE
I	1348082	1348103	14	+	ID=TTTTTCAGCGGTCTCGTTATGA;Hits=366;Alias=PAL5A;Class=23H-RNA	TRUE
I	1348086	1348108	22	+	ID=TCAGCGGTCTCGTTATGAAAATC;Hits=354;Alias=PAL5A;Class=23H-RNA	TRUE
I	1348088	1348110	36	+	ID=AGCGGTCTCGTTATGAAAATCAG;Hits=351;Alias=PAL5A;Class=23H-RNA	TRUE
I	1348091	1348113	11	-	ID=TACCTGATTTTCATAACGAGACC;Hits=346;Alias=PAL5A;Class=23H-RNA	TRUE
I	1352064	1352086	171	+	ID=TCCCGCATTTTTTGTAGATCAAA;Hits=830;Alias=CELE14B;Class=23H-RNA	TRUE
I	1352066	1352086	27	+	ID=CCGCATTTTTTGTAGATCAAA;Hits=974;Alias=CELE14B;Class=23H-RNA	TRUE
I	1352377	1352400	11	+	ID=TACGGTTTGATCTACAAAAAATGC;Hits=344;Alias=CELE14B;Class=23H-RNA	TRUE
I	1352379	1352401	53	-	ID=CGCATTTTTTGTAGATCAAACCG;Hits=649;Alias=CELE14B;Class=23H-RNA	TRUE
I	1352380	1352401	6	-	ID=CGCATTTTTTGTAGATCAAACC;Hits=732;Alias=CELE14B;Class=23H-RNA	TRUE
I	1352380	1352402	27	-	ID=CCGCATTTTTTGTAGATCAAACC;Hits=693;Alias=CELE14B;Class=23H-RNA	TRUE
I	1352382	1352402	27	-	ID=CCGCATTTTTTGTAGATCAAA;Hits=974;Alias=CELE14B;Class=23H-RNA	TRUE
I	1352382	1352403	25	+	ID=TTTGATCTACAAAAAATGCGGG;Hits=878;Alias=CELE14B;Class=23H-RNA	TRUE
I	1352382	1352404	171	-	ID=TCCCGCATTTTTTGTAGATCAAA;Hits=830;Alias=CELE14B;Class=23H-RNA	TRUE
I	1352383	1352404	78	-	ID=TCCCGCATTTTTTGTAGATCAA;Hits=1072;Alias=CELE14B;Class=23H-RNA	TRUE
I	1352384	1352405	15	-	ID=TTCCCGCATTTTTTGTAGATCA;Hits=857;Alias=CELE14B;Class=23H-RNA	TRUE
I	1352384	1352406	76	+	ID=TGATCTACAAAAAATGCGGGAAT;Hits=762;Alias=CELE14B;Class=23H-RNA	TRUE
I	1352384	1352407	23	+	ID=TGATCTACAAAAAATGCGGGAATT;Hits=693;Alias=CELE14B;Class=23H-RNA	TRUE
I	1352385	1352405	5	-	ID=TTCCCGCATTTTTTGTAGATC;Hits=922;Alias=CELE14B;Class=23H-RNA	TRUE
I	1362058	1362080	16	-	ID=TCTCGCCGTCCATCGACTTTAAA;Hits=86;Alias=PALTTAA1;Class=23H-RNA	TRUE
I	1362059	1362080	10	-	ID=TCTCGCCGTCCATCGACTTTAA;Hits=86;Alias=PALTTAA1;Class=23H-RNA	TRUE
I	1362060	1362082	42	+	ID=TAAAGTCGATGGACGGCGAGATT;Hits=85;Alias=PALTTAA1;Class=23H-RNA	TRUE
I	1362061	1362082	43	+	ID=AACAACGAAGCTCCGAAATAACG;Hits=9;Alias=PALTTAA1;Class=23H-RNA	TRUE
I	1362174	1362196	7	+	ID=TCAAAATTTGACGGTGATTTCAA;Hits=92;Alias=PALTTAA1;Class=23H-RNA	TRUE
I	1364063	1364084	12	+	ID=TCCGAACAAAAGAGTAACTATT;Hits=50;Alias=other;Class=23H-RNA	TRUE
I	1369041	1369062	13	+	ID=TCACGAGGGACGAGGAAAAGTG;Hits=316;Alias=PAL5A;Class=23H-RNA	TRUE
I	1369347	1369369	11	+	ID=TACCTGATTTTCATAACGAGACC;Hits=346;Alias=PAL5A;Class=23H-RNA	TRUE
I	1369350	1369372	36	-	ID=AGCGGTCTCGTTATGAAAATCAG;Hits=351;Alias=PAL5A;Class=23H-RNA	TRUE
I	1369352	1369374	22	-	ID=TCAGCGGTCTCGTTATGAAAATC;Hits=354;Alias=PAL5A;Class=23H-RNA	TRUE
I	1369357	1369378	14	-	ID=TTTTTCAGCGGTCTCGTTATGA;Hits=366;Alias=PAL5A;Class=23H-RNA	TRUE
I	1369357	1369379	63	-	ID=CTTTTTCAGCGGTCTCGTTATGA;Hits=354;Alias=PAL5A;Class=23H-RNA	TRUE
I	1369358	1369378	13	-	ID=TTTTTCAGCGGTCTCGTTATG;Hits=368;Alias=PAL5A;Class=23H-RNA	TRUE
I	1369358	1369379	62	-	ID=CTTTTTCAGCGGTCTCGTTATG;Hits=356;Alias=PAL5A;Class=23H-RNA	TRUE
I	1369358	1369380	40	-	ID=ACTTTTTCAGCGGTCTCGTTATG;Hits=355;Alias=PAL5A;Class=23H-RNA	TRUE
I	1369358	1369380	11	+	ID=CATAACGAGACCGCTGAAAAAGT;Hits=355;Alias=PAL5A;Class=23H-RNA	TRUE
I	1369359	1369380	18	+	ID=ATAACGAGACCGCTGAAAAAGT;Hits=371;Alias=PAL5A;Class=23H-RNA	TRUE
I	1369359	1369381	73	+	ID=ATAACGAGACCGCTGAAAAAGTT;Hits=369;Alias=PAL5A;Class=23H-RNA	TRUE
I	1369360	1369381	87	+	ID=TAACGAGACCGCTGAAAAAGTT;Hits=369;Alias=PAL5A;Class=23H-RNA	TRUE
I	1369360	1369382	46	+	ID=TAACGAGACCGCTGAAAAAGTTT;Hits=364;Alias=PAL5A;Class=23H-RNA	TRUE
I	1369361	1369382	24	+	ID=AACGAGACCGCTGAAAAAGTTT;Hits=371;Alias=PAL5A;Class=23H-RNA	TRUE
I	1369459	1369480	24	-	ID=AACGAGACCGCTGAAAAAGTTT;Hits=371;Alias=PAL5A;Class=23H-RNA	TRUE
I	1369459	1369481	46	-	ID=TAACGAGACCGCTGAAAAAGTTT;Hits=364;Alias=PAL5A;Class=23H-RNA	TRUE
I	1369460	1369481	87	-	ID=TAACGAGACCGCTGAAAAAGTT;Hits=369;Alias=PAL5A;Class=23H-RNA	TRUE
I	1369460	1369482	73	-	ID=ATAACGAGACCGCTGAAAAAGTT;Hits=369;Alias=PAL5A;Class=23H-RNA	TRUE
I	1369461	1369482	18	-	ID=ATAACGAGACCGCTGAAAAAGT;Hits=371;Alias=PAL5A;Class=23H-RNA	TRUE
I	1369461	1369483	40	+	ID=ACTTTTTCAGCGGTCTCGTTATG;Hits=355;Alias=PAL5A;Class=23H-RNA	TRUE
I	1369461	1369483	11	-	ID=CATAACGAGACCGCTGAAAAAGT;Hits=355;Alias=PAL5A;Class=23H-RNA	TRUE
I	1369462	1369483	62	+	ID=CTTTTTCAGCGGTCTCGTTATG;Hits=356;Alias=PAL5A;Class=23H-RNA	TRUE
I	1369462	1369484	63	+	ID=CTTTTTCAGCGGTCTCGTTATGA;Hits=354;Alias=PAL5A;Class=23H-RNA	TRUE
I	1369463	1369483	13	+	ID=TTTTTCAGCGGTCTCGTTATG;Hits=368;Alias=PAL5A;Class=23H-RNA	TRUE
I	1369463	1369484	14	+	ID=TTTTTCAGCGGTCTCGTTATGA;Hits=366;Alias=PAL5A;Class=23H-RNA	TRUE
I	1370513	1370535	13	-	ID=AGCGAAAACTACAGTAATTCTTT;Hits=342;Alias=CELE1;Class=23H-RNA	TRUE
I	1370514	1370535	7	-	ID=AGCGAAAACTACAGTAATTCTT;Hits=384;Alias=CELE1;Class=23H-RNA	TRUE
I	1370514	1370536	35	-	ID=TAGCGAAAACTACAGTAATTCTT;Hits=331;Alias=CELE1;Class=23H-RNA	TRUE
I	1376212	1376233	13	+	ID=TCACGAGGGACGAGGAAAAGTG;Hits=316;Alias=PAL5A;Class=23H-RNA	TRUE
I	1376630	1376651	24	-	ID=AACGAGACCGCTGAAAAAGTTT;Hits=371;Alias=PAL5A;Class=23H-RNA	TRUE
I	1376630	1376652	46	-	ID=TAACGAGACCGCTGAAAAAGTTT;Hits=364;Alias=PAL5A;Class=23H-RNA	TRUE
I	1376631	1376652	87	-	ID=TAACGAGACCGCTGAAAAAGTT;Hits=369;Alias=PAL5A;Class=23H-RNA	TRUE
I	1376631	1376653	73	-	ID=ATAACGAGACCGCTGAAAAAGTT;Hits=369;Alias=PAL5A;Class=23H-RNA	TRUE
I	1376632	1376653	18	-	ID=ATAACGAGACCGCTGAAAAAGT;Hits=371;Alias=PAL5A;Class=23H-RNA	TRUE
I	1376632	1376654	40	+	ID=ACTTTTTCAGCGGTCTCGTTATG;Hits=355;Alias=PAL5A;Class=23H-RNA	TRUE
I	1376632	1376654	11	-	ID=CATAACGAGACCGCTGAAAAAGT;Hits=355;Alias=PAL5A;Class=23H-RNA	TRUE
I	1376633	1376654	62	+	ID=CTTTTTCAGCGGTCTCGTTATG;Hits=356;Alias=PAL5A;Class=23H-RNA	TRUE
I	1376633	1376655	63	+	ID=CTTTTTCAGCGGTCTCGTTATGA;Hits=354;Alias=PAL5A;Class=23H-RNA	TRUE
I	1376634	1376654	13	+	ID=TTTTTCAGCGGTCTCGTTATG;Hits=368;Alias=PAL5A;Class=23H-RNA	TRUE
I	1376634	1376655	14	+	ID=TTTTTCAGCGGTCTCGTTATGA;Hits=366;Alias=PAL5A;Class=23H-RNA	TRUE
I	1376638	1376660	22	+	ID=TCAGCGGTCTCGTTATGAAAATC;Hits=354;Alias=PAL5A;Class=23H-RNA	TRUE
I	1376640	1376662	36	+	ID=AGCGGTCTCGTTATGAAAATCAG;Hits=351;Alias=PAL5A;Class=23H-RNA	TRUE
I	1376950	1376971	13	-	ID=TCACGAGGGACGAGGAAAAGTG;Hits=316;Alias=PAL5A;Class=23H-RNA	TRUE
I	1380634	1380654	5	-	ID=ATGATTTATTGTTCCCGTAAT;Hits=54;Alias=PALTA4;Class=23H-RNA	TRUE
I	1380634	1380656	7	-	ID=TCATGATTTATTGTTCCCGTAAT;Hits=53;Alias=PALTA4;Class=23H-RNA	TRUE
I	1386691	1386711	17	-	ID=TTACCTATCGGCTTTAAATGT;Hits=87;Alias=PALTTAA3;Class=23H-RNA	TRUE
I	1386693	1386713	5	+	ID=ATTTAAAGCCGATAGGTAACC;Hits=91;Alias=PALTTAA3;Class=23H-RNA	TRUE
I	1386730	1386750	5	-	ID=ATTTAAAGCCGATAGGTAACC;Hits=91;Alias=PALTTAA3;Class=23H-RNA	TRUE
I	1386732	1386752	17	+	ID=TTACCTATCGGCTTTAAATGT;Hits=87;Alias=PALTTAA3;Class=23H-RNA	TRUE
I	1386828	1386848	21	+	ID=TTCGGACAGATGTGACACGGA;Hits=28;Alias=PALTTAA3;Class=23H-RNA	TRUE
I	1386828	1386848	12	-	ID=TCCGTGTCACATCTGTCCGAA;Hits=28;Alias=PALTTAA3;Class=23H-RNA	TRUE
I	1387555	1387575	17	-	ID=TTACCTATCGGCTTTAAATGT;Hits=87;Alias=PALTTAA3;Class=23H-RNA	TRUE
I	1387557	1387577	5	+	ID=ATTTAAAGCCGATAGGTAACC;Hits=91;Alias=PALTTAA3;Class=23H-RNA	TRUE
I	1388741	1388763	11	+	ID=TACCTGATTTTCATAACGAGACC;Hits=346;Alias=PAL5A;Class=23H-RNA	TRUE
I	1388744	1388766	36	-	ID=AGCGGTCTCGTTATGAAAATCAG;Hits=351;Alias=PAL5A;Class=23H-RNA	TRUE
I	1388746	1388768	22	-	ID=TCAGCGGTCTCGTTATGAAAATC;Hits=354;Alias=PAL5A;Class=23H-RNA	TRUE
I	1388751	1388772	14	-	ID=TTTTTCAGCGGTCTCGTTATGA;Hits=366;Alias=PAL5A;Class=23H-RNA	TRUE
I	1388751	1388773	63	-	ID=CTTTTTCAGCGGTCTCGTTATGA;Hits=354;Alias=PAL5A;Class=23H-RNA	TRUE
I	1388752	1388772	13	-	ID=TTTTTCAGCGGTCTCGTTATG;Hits=368;Alias=PAL5A;Class=23H-RNA	TRUE
I	1388752	1388773	62	-	ID=CTTTTTCAGCGGTCTCGTTATG;Hits=356;Alias=PAL5A;Class=23H-RNA	TRUE
I	1388752	1388774	40	-	ID=ACTTTTTCAGCGGTCTCGTTATG;Hits=355;Alias=PAL5A;Class=23H-RNA	TRUE
I	1388752	1388774	11	+	ID=CATAACGAGACCGCTGAAAAAGT;Hits=355;Alias=PAL5A;Class=23H-RNA	TRUE
I	1388753	1388774	18	+	ID=ATAACGAGACCGCTGAAAAAGT;Hits=371;Alias=PAL5A;Class=23H-RNA	TRUE
I	1388753	1388775	73	+	ID=ATAACGAGACCGCTGAAAAAGTT;Hits=369;Alias=PAL5A;Class=23H-RNA	TRUE
I	1388754	1388775	87	+	ID=TAACGAGACCGCTGAAAAAGTT;Hits=369;Alias=PAL5A;Class=23H-RNA	TRUE
I	1388754	1388776	46	+	ID=TAACGAGACCGCTGAAAAAGTTT;Hits=364;Alias=PAL5A;Class=23H-RNA	TRUE
I	1388755	1388776	24	+	ID=AACGAGACCGCTGAAAAAGTTT;Hits=371;Alias=PAL5A;Class=23H-RNA	TRUE
I	1388860	1388882	22	+	ID=TCAGCGGTCTCGTTATGAAAATC;Hits=354;Alias=PAL5A;Class=23H-RNA	TRUE
I	1388862	1388884	36	+	ID=AGCGGTCTCGTTATGAAAATCAG;Hits=351;Alias=PAL5A;Class=23H-RNA	TRUE
I	1399569	1399590	13	+	ID=TCACGAGGGACGAGGAAAAGTG;Hits=316;Alias=PAL5A;Class=23H-RNA	TRUE
I	1399874	1399896	11	+	ID=TACCTGATTTTCATAACGAGACC;Hits=346;Alias=PAL5A;Class=23H-RNA	TRUE
I	1399976	1399997	24	-	ID=AACGAGACCGCTGAAAAAGTTT;Hits=371;Alias=PAL5A;Class=23H-RNA	TRUE
I	1399976	1399998	46	-	ID=TAACGAGACCGCTGAAAAAGTTT;Hits=364;Alias=PAL5A;Class=23H-RNA	TRUE
I	1399977	1399998	87	-	ID=TAACGAGACCGCTGAAAAAGTT;Hits=369;Alias=PAL5A;Class=23H-RNA	TRUE
I	1399977	1399999	73	-	ID=ATAACGAGACCGCTGAAAAAGTT;Hits=369;Alias=PAL5A;Class=23H-RNA	TRUE
I	1399978	1399999	18	-	ID=ATAACGAGACCGCTGAAAAAGT;Hits=371;Alias=PAL5A;Class=23H-RNA	TRUE
I	1399978	1400000	40	+	ID=ACTTTTTCAGCGGTCTCGTTATG;Hits=355;Alias=PAL5A;Class=23H-RNA	TRUE
I	1399978	1400000	11	-	ID=CATAACGAGACCGCTGAAAAAGT;Hits=355;Alias=PAL5A;Class=23H-RNA	TRUE
I	1399979	1400000	62	+	ID=CTTTTTCAGCGGTCTCGTTATG;Hits=356;Alias=PAL5A;Class=23H-RNA	TRUE
I	1399979	1400001	63	+	ID=CTTTTTCAGCGGTCTCGTTATGA;Hits=354;Alias=PAL5A;Class=23H-RNA	TRUE
I	1399980	1400000	13	+	ID=TTTTTCAGCGGTCTCGTTATG;Hits=368;Alias=PAL5A;Class=23H-RNA	TRUE
I	1399980	1400001	14	+	ID=TTTTTCAGCGGTCTCGTTATGA;Hits=366;Alias=PAL5A;Class=23H-RNA	TRUE
I	1399984	1400006	22	+	ID=TCAGCGGTCTCGTTATGAAAATC;Hits=354;Alias=PAL5A;Class=23H-RNA	TRUE
I	1399986	1400008	36	+	ID=AGCGGTCTCGTTATGAAAATCAG;Hits=351;Alias=PAL5A;Class=23H-RNA	TRUE
I	1399989	1400011	11	-	ID=TACCTGATTTTCATAACGAGACC;Hits=346;Alias=PAL5A;Class=23H-RNA	TRUE
I	1400295	1400316	13	-	ID=TCACGAGGGACGAGGAAAAGTG;Hits=316;Alias=PAL5A;Class=23H-RNA	TRUE
I	1400543	1400565	35	+	ID=TAGCGAAAACTACAGTAATTCTT;Hits=331;Alias=CELE1;Class=23H-RNA	TRUE
I	1400544	1400565	7	+	ID=AGCGAAAACTACAGTAATTCTT;Hits=384;Alias=CELE1;Class=23H-RNA	TRUE
I	1400544	1400566	13	+	ID=AGCGAAAACTACAGTAATTCTTT;Hits=342;Alias=CELE1;Class=23H-RNA	TRUE
I	1403990	1404012	53	-	ID=CGCATTTTTTGTAGATCAAACCG;Hits=649;Alias=CELE14B;Class=23H-RNA	TRUE
I	1403991	1404012	6	-	ID=CGCATTTTTTGTAGATCAAACC;Hits=732;Alias=CELE14B;Class=23H-RNA	TRUE
I	1403991	1404013	27	-	ID=CCGCATTTTTTGTAGATCAAACC;Hits=693;Alias=CELE14B;Class=23H-RNA	TRUE
I	1403993	1404013	27	-	ID=CCGCATTTTTTGTAGATCAAA;Hits=974;Alias=CELE14B;Class=23H-RNA	TRUE
I	1403993	1404014	25	+	ID=TTTGATCTACAAAAAATGCGGG;Hits=878;Alias=CELE14B;Class=23H-RNA	TRUE
I	1403993	1404015	171	-	ID=TCCCGCATTTTTTGTAGATCAAA;Hits=830;Alias=CELE14B;Class=23H-RNA	TRUE
I	1403994	1404015	78	-	ID=TCCCGCATTTTTTGTAGATCAA;Hits=1072;Alias=CELE14B;Class=23H-RNA	TRUE
I	1403995	1404016	15	-	ID=TTCCCGCATTTTTTGTAGATCA;Hits=857;Alias=CELE14B;Class=23H-RNA	TRUE
I	1403995	1404017	76	+	ID=TGATCTACAAAAAATGCGGGAAT;Hits=762;Alias=CELE14B;Class=23H-RNA	TRUE
I	1403995	1404018	23	+	ID=TGATCTACAAAAAATGCGGGAATT;Hits=693;Alias=CELE14B;Class=23H-RNA	TRUE
I	1403996	1404016	5	-	ID=TTCCCGCATTTTTTGTAGATC;Hits=922;Alias=CELE14B;Class=23H-RNA	TRUE
I	1404628	1404651	11	+	ID=TACGGTTTGATCTACAAAAAATGC;Hits=344;Alias=CELE14B;Class=23H-RNA	TRUE
I	1404630	1404652	53	-	ID=CGCATTTTTTGTAGATCAAACCG;Hits=649;Alias=CELE14B;Class=23H-RNA	TRUE
I	1404631	1404652	6	-	ID=CGCATTTTTTGTAGATCAAACC;Hits=732;Alias=CELE14B;Class=23H-RNA	TRUE
I	1404631	1404653	27	-	ID=CCGCATTTTTTGTAGATCAAACC;Hits=693;Alias=CELE14B;Class=23H-RNA	TRUE
I	1404633	1404653	27	-	ID=CCGCATTTTTTGTAGATCAAA;Hits=974;Alias=CELE14B;Class=23H-RNA	TRUE
I	1404633	1404654	25	+	ID=TTTGATCTACAAAAAATGCGGG;Hits=878;Alias=CELE14B;Class=23H-RNA	TRUE
I	1404633	1404655	171	-	ID=TCCCGCATTTTTTGTAGATCAAA;Hits=830;Alias=CELE14B;Class=23H-RNA	TRUE
I	1404634	1404655	78	-	ID=TCCCGCATTTTTTGTAGATCAA;Hits=1072;Alias=CELE14B;Class=23H-RNA	TRUE
I	1404635	1404656	15	-	ID=TTCCCGCATTTTTTGTAGATCA;Hits=857;Alias=CELE14B;Class=23H-RNA	TRUE
I	1404635	1404657	76	+	ID=TGATCTACAAAAAATGCGGGAAT;Hits=762;Alias=CELE14B;Class=23H-RNA	TRUE
I	1404635	1404658	23	+	ID=TGATCTACAAAAAATGCGGGAATT;Hits=693;Alias=CELE14B;Class=23H-RNA	TRUE
I	1404636	1404656	5	-	ID=TTCCCGCATTTTTTGTAGATC;Hits=922;Alias=CELE14B;Class=23H-RNA	TRUE
I	1406647	1406668	6	-	ID=CGCATTTTTTGTAGATCAACGT;Hits=155;Alias=CELE14B;Class=23H-RNA	TRUE
I	1406650	1406671	78	-	ID=TCCCGCATTTTTTGTAGATCAA;Hits=1072;Alias=CELE14B;Class=23H-RNA	TRUE
I	1406744	1406767	23	-	ID=TGATCTACAAAAAATGCGGGAATT;Hits=693;Alias=CELE14B;Class=23H-RNA	TRUE
I	1406745	1406767	76	-	ID=TGATCTACAAAAAATGCGGGAAT;Hits=762;Alias=CELE14B;Class=23H-RNA	TRUE
I	1406746	1406766	5	+	ID=TTCCCGCATTTTTTGTAGATC;Hits=922;Alias=CELE14B;Class=23H-RNA	TRUE
I	1406746	1406767	15	+	ID=TTCCCGCATTTTTTGTAGATCA;Hits=857;Alias=CELE14B;Class=23H-RNA	TRUE
I	1406747	1406768	78	+	ID=TCCCGCATTTTTTGTAGATCAA;Hits=1072;Alias=CELE14B;Class=23H-RNA	TRUE
I	1406747	1406769	171	+	ID=TCCCGCATTTTTTGTAGATCAAA;Hits=830;Alias=CELE14B;Class=23H-RNA	TRUE
I	1406748	1406769	25	-	ID=TTTGATCTACAAAAAATGCGGG;Hits=878;Alias=CELE14B;Class=23H-RNA	TRUE
I	1406749	1406769	27	+	ID=CCGCATTTTTTGTAGATCAAA;Hits=974;Alias=CELE14B;Class=23H-RNA	TRUE
I	1406749	1406771	27	+	ID=CCGCATTTTTTGTAGATCAAACC;Hits=693;Alias=CELE14B;Class=23H-RNA	TRUE
I	1406750	1406771	6	+	ID=CGCATTTTTTGTAGATCAAACC;Hits=732;Alias=CELE14B;Class=23H-RNA	TRUE
I	1406750	1406772	53	+	ID=CGCATTTTTTGTAGATCAAACCG;Hits=649;Alias=CELE14B;Class=23H-RNA	TRUE
I	1408130	1408153	11	+	ID=TACGGTTTGATCTACAAAAAATGC;Hits=344;Alias=CELE14B;Class=23H-RNA	TRUE
I	1408132	1408154	53	-	ID=CGCATTTTTTGTAGATCAAACCG;Hits=649;Alias=CELE14B;Class=23H-RNA	TRUE
I	1408133	1408154	6	-	ID=CGCATTTTTTGTAGATCAAACC;Hits=732;Alias=CELE14B;Class=23H-RNA	TRUE
I	1408133	1408155	27	-	ID=CCGCATTTTTTGTAGATCAAACC;Hits=693;Alias=CELE14B;Class=23H-RNA	TRUE
I	1408135	1408155	27	-	ID=CCGCATTTTTTGTAGATCAAA;Hits=974;Alias=CELE14B;Class=23H-RNA	TRUE
I	1408135	1408156	25	+	ID=TTTGATCTACAAAAAATGCGGG;Hits=878;Alias=CELE14B;Class=23H-RNA	TRUE
I	1408135	1408157	171	-	ID=TCCCGCATTTTTTGTAGATCAAA;Hits=830;Alias=CELE14B;Class=23H-RNA	TRUE
I	1408136	1408157	78	-	ID=TCCCGCATTTTTTGTAGATCAA;Hits=1072;Alias=CELE14B;Class=23H-RNA	TRUE
I	1408137	1408158	15	-	ID=TTCCCGCATTTTTTGTAGATCA;Hits=857;Alias=CELE14B;Class=23H-RNA	TRUE
I	1408137	1408159	76	+	ID=TGATCTACAAAAAATGCGGGAAT;Hits=762;Alias=CELE14B;Class=23H-RNA	TRUE
I	1408137	1408160	23	+	ID=TGATCTACAAAAAATGCGGGAATT;Hits=693;Alias=CELE14B;Class=23H-RNA	TRUE
I	1408138	1408158	5	-	ID=TTCCCGCATTTTTTGTAGATC;Hits=922;Alias=CELE14B;Class=23H-RNA	TRUE
I	1409650	1409671	6	-	ID=CGCATTTTTTGTAGATCAACGT;Hits=155;Alias=CELE14B;Class=23H-RNA	TRUE
I	1409653	1409674	78	-	ID=TCCCGCATTTTTTGTAGATCAA;Hits=1072;Alias=CELE14B;Class=23H-RNA	TRUE
I	1409730	1409751	25	-	ID=TTTGATCTACAAAAAATGCGGG;Hits=878;Alias=CELE14B;Class=23H-RNA	TRUE
I	1409732	1409753	6	+	ID=CGCATTTTTTGTAGATCAAACC;Hits=732;Alias=CELE14B;Class=23H-RNA	TRUE
I	1409732	1409754	53	+	ID=CGCATTTTTTGTAGATCAAACCG;Hits=649;Alias=CELE14B;Class=23H-RNA	TRUE
I	1418425	1418446	7	+	ID=AAATCACCGTCTAATTTTGAGT;Hits=8;Alias=other;Class=23H-RNA	TRUE
I	1419436	1419457	13	+	ID=TCACGAGGGACGAGGAAAAGTG;Hits=316;Alias=PAL5A;Class=23H-RNA	TRUE
I	1419743	1419765	11	+	ID=TACCTGATTTTCATAACGAGACC;Hits=346;Alias=PAL5A;Class=23H-RNA	TRUE
I	1419746	1419768	36	-	ID=AGCGGTCTCGTTATGAAAATCAG;Hits=351;Alias=PAL5A;Class=23H-RNA	TRUE
I	1419748	1419770	22	-	ID=TCAGCGGTCTCGTTATGAAAATC;Hits=354;Alias=PAL5A;Class=23H-RNA	TRUE
I	1419753	1419774	14	-	ID=TTTTTCAGCGGTCTCGTTATGA;Hits=366;Alias=PAL5A;Class=23H-RNA	TRUE
I	1419753	1419775	63	-	ID=CTTTTTCAGCGGTCTCGTTATGA;Hits=354;Alias=PAL5A;Class=23H-RNA	TRUE
I	1419754	1419774	13	-	ID=TTTTTCAGCGGTCTCGTTATG;Hits=368;Alias=PAL5A;Class=23H-RNA	TRUE
I	1419754	1419775	62	-	ID=CTTTTTCAGCGGTCTCGTTATG;Hits=356;Alias=PAL5A;Class=23H-RNA	TRUE
I	1419754	1419776	40	-	ID=ACTTTTTCAGCGGTCTCGTTATG;Hits=355;Alias=PAL5A;Class=23H-RNA	TRUE
I	1419754	1419776	11	+	ID=CATAACGAGACCGCTGAAAAAGT;Hits=355;Alias=PAL5A;Class=23H-RNA	TRUE
I	1419755	1419776	18	+	ID=ATAACGAGACCGCTGAAAAAGT;Hits=371;Alias=PAL5A;Class=23H-RNA	TRUE
I	1419755	1419777	73	+	ID=ATAACGAGACCGCTGAAAAAGTT;Hits=369;Alias=PAL5A;Class=23H-RNA	TRUE
I	1419756	1419777	87	+	ID=TAACGAGACCGCTGAAAAAGTT;Hits=369;Alias=PAL5A;Class=23H-RNA	TRUE
I	1419756	1419778	46	+	ID=TAACGAGACCGCTGAAAAAGTTT;Hits=364;Alias=PAL5A;Class=23H-RNA	TRUE
I	1419757	1419778	24	+	ID=AACGAGACCGCTGAAAAAGTTT;Hits=371;Alias=PAL5A;Class=23H-RNA	TRUE
I	1419855	1419876	24	-	ID=AACGAGACCGCTGAAAAAGTTT;Hits=371;Alias=PAL5A;Class=23H-RNA	TRUE
I	1419855	1419877	46	-	ID=TAACGAGACCGCTGAAAAAGTTT;Hits=364;Alias=PAL5A;Class=23H-RNA	TRUE
I	1419856	1419877	87	-	ID=TAACGAGACCGCTGAAAAAGTT;Hits=369;Alias=PAL5A;Class=23H-RNA	TRUE
I	1419856	1419878	73	-	ID=ATAACGAGACCGCTGAAAAAGTT;Hits=369;Alias=PAL5A;Class=23H-RNA	TRUE
I	1419857	1419878	18	-	ID=ATAACGAGACCGCTGAAAAAGT;Hits=371;Alias=PAL5A;Class=23H-RNA	TRUE
I	1419857	1419879	40	+	ID=ACTTTTTCAGCGGTCTCGTTATG;Hits=355;Alias=PAL5A;Class=23H-RNA	TRUE
I	1419857	1419879	11	-	ID=CATAACGAGACCGCTGAAAAAGT;Hits=355;Alias=PAL5A;Class=23H-RNA	TRUE
I	1419858	1419879	62	+	ID=CTTTTTCAGCGGTCTCGTTATG;Hits=356;Alias=PAL5A;Class=23H-RNA	TRUE
I	1419858	1419880	63	+	ID=CTTTTTCAGCGGTCTCGTTATGA;Hits=354;Alias=PAL5A;Class=23H-RNA	TRUE
I	1419859	1419879	13	+	ID=TTTTTCAGCGGTCTCGTTATG;Hits=368;Alias=PAL5A;Class=23H-RNA	TRUE
I	1419859	1419880	14	+	ID=TTTTTCAGCGGTCTCGTTATGA;Hits=366;Alias=PAL5A;Class=23H-RNA	TRUE
I	1419863	1419885	22	+	ID=TCAGCGGTCTCGTTATGAAAATC;Hits=354;Alias=PAL5A;Class=23H-RNA	TRUE
I	1419865	1419887	36	+	ID=AGCGGTCTCGTTATGAAAATCAG;Hits=351;Alias=PAL5A;Class=23H-RNA	TRUE
I	1420122	1420143	13	-	ID=TCACGAGGGACGAGGAAAAGTG;Hits=316;Alias=PAL5A;Class=23H-RNA	TRUE
I	1422450	1422471	7	-	ID=AAATCACCGTCTAATTTTGAGT;Hits=8;Alias=other;Class=23H-RNA	TRUE
I	1425640	1425661	6	-	ID=CGCATTTTTTGTAGATCAAACC;Hits=732;Alias=CELE14B;Class=23H-RNA	TRUE
I	1425640	1425662	27	-	ID=CCGCATTTTTTGTAGATCAAACC;Hits=693;Alias=CELE14B;Class=23H-RNA	TRUE
I	1425642	1425662	27	-	ID=CCGCATTTTTTGTAGATCAAA;Hits=974;Alias=CELE14B;Class=23H-RNA	TRUE
I	1425642	1425663	25	+	ID=TTTGATCTACAAAAAATGCGGG;Hits=878;Alias=CELE14B;Class=23H-RNA	TRUE
I	1425642	1425664	171	-	ID=TCCCGCATTTTTTGTAGATCAAA;Hits=830;Alias=CELE14B;Class=23H-RNA	TRUE
I	1425742	1425765	23	-	ID=TGATCTACAAAAAATGCGGGAATT;Hits=693;Alias=CELE14B;Class=23H-RNA	TRUE
I	1425743	1425765	76	-	ID=TGATCTACAAAAAATGCGGGAAT;Hits=762;Alias=CELE14B;Class=23H-RNA	TRUE
I	1425744	1425764	5	+	ID=TTCCCGCATTTTTTGTAGATC;Hits=922;Alias=CELE14B;Class=23H-RNA	TRUE
I	1425744	1425765	15	+	ID=TTCCCGCATTTTTTGTAGATCA;Hits=857;Alias=CELE14B;Class=23H-RNA	TRUE
I	1425745	1425766	78	+	ID=TCCCGCATTTTTTGTAGATCAA;Hits=1072;Alias=CELE14B;Class=23H-RNA	TRUE
I	1425745	1425767	171	+	ID=TCCCGCATTTTTTGTAGATCAAA;Hits=830;Alias=CELE14B;Class=23H-RNA	TRUE
I	1425746	1425767	25	-	ID=TTTGATCTACAAAAAATGCGGG;Hits=878;Alias=CELE14B;Class=23H-RNA	TRUE
I	1425747	1425767	27	+	ID=CCGCATTTTTTGTAGATCAAA;Hits=974;Alias=CELE14B;Class=23H-RNA	TRUE
I	1425747	1425769	27	+	ID=CCGCATTTTTTGTAGATCAAACC;Hits=693;Alias=CELE14B;Class=23H-RNA	TRUE
I	1425748	1425769	6	+	ID=CGCATTTTTTGTAGATCAAACC;Hits=732;Alias=CELE14B;Class=23H-RNA	TRUE
I	1425748	1425770	53	+	ID=CGCATTTTTTGTAGATCAAACCG;Hits=649;Alias=CELE14B;Class=23H-RNA	TRUE
I	1426891	1426913	76	-	ID=TGATCTACAAAAAATGCGGGAAT;Hits=762;Alias=CELE14B;Class=23H-RNA	TRUE
I	1426892	1426912	5	+	ID=TTCCCGCATTTTTTGTAGATC;Hits=922;Alias=CELE14B;Class=23H-RNA	TRUE
I	1426892	1426913	15	+	ID=TTCCCGCATTTTTTGTAGATCA;Hits=857;Alias=CELE14B;Class=23H-RNA	TRUE
I	1426893	1426915	5	+	ID=TCCCGCATTTTTTGTAGATCACA;Hits=48;Alias=CELE14B;Class=23H-RNA	TRUE
I	1438044	1438066	14	-	ID=TACTGTAGCGCTTGTGTCGATTT;Hits=253;Alias=CELE1;Class=23H-RNA	TRUE
I	1438045	1438066	15	-	ID=TACTGTAGCGCTTGTGTCGATT;Hits=262;Alias=CELE1;Class=23H-RNA	TRUE
I	1438046	1438067	12	+	ID=ATCGACACAAGCGCTACAGTAG;Hits=228;Alias=CELE1;Class=23H-RNA	TRUE
I	1438046	1438068	54	+	ID=ATCGACACAAGCGCTACAGTAGT;Hits=211;Alias=CELE1;Class=23H-RNA	TRUE
I	1440103	1440125	54	-	ID=ATCGACACAAGCGCTACAGTAGT;Hits=211;Alias=CELE1;Class=23H-RNA	TRUE
I	1440104	1440125	12	-	ID=ATCGACACAAGCGCTACAGTAG;Hits=228;Alias=CELE1;Class=23H-RNA	TRUE
I	1440105	1440126	15	+	ID=TACTGTAGCGCTTGTGTCGATT;Hits=262;Alias=CELE1;Class=23H-RNA	TRUE
I	1440105	1440127	14	+	ID=TACTGTAGCGCTTGTGTCGATTT;Hits=253;Alias=CELE1;Class=23H-RNA	TRUE
I	1440230	1440252	14	-	ID=TACTGTAGCGCTTGTGTCGATTT;Hits=253;Alias=CELE1;Class=23H-RNA	TRUE
I	1440231	1440252	15	-	ID=TACTGTAGCGCTTGTGTCGATT;Hits=262;Alias=CELE1;Class=23H-RNA	TRUE
I	1440232	1440253	12	+	ID=ATCGACACAAGCGCTACAGTAG;Hits=228;Alias=CELE1;Class=23H-RNA	TRUE
I	1440232	1440254	54	+	ID=ATCGACACAAGCGCTACAGTAGT;Hits=211;Alias=CELE1;Class=23H-RNA	TRUE
I	1447674	1447695	6	-	ID=CGCATTTTTTGTAGATCAACGT;Hits=155;Alias=CELE14B;Class=23H-RNA	TRUE
I	1450905	1450927	53	-	ID=CGCATTTTTTGTAGATCAAACCG;Hits=649;Alias=CELE14B;Class=23H-RNA	TRUE
I	1450906	1450927	6	-	ID=CGCATTTTTTGTAGATCAAACC;Hits=732;Alias=CELE14B;Class=23H-RNA	TRUE
I	1450906	1450928	27	-	ID=CCGCATTTTTTGTAGATCAAACC;Hits=693;Alias=CELE14B;Class=23H-RNA	TRUE
I	1450908	1450928	27	-	ID=CCGCATTTTTTGTAGATCAAA;Hits=974;Alias=CELE14B;Class=23H-RNA	TRUE
I	1450908	1450929	25	+	ID=TTTGATCTACAAAAAATGCGGG;Hits=878;Alias=CELE14B;Class=23H-RNA	TRUE
I	1450908	1450930	171	-	ID=TCCCGCATTTTTTGTAGATCAAA;Hits=830;Alias=CELE14B;Class=23H-RNA	TRUE
I	1450909	1450930	78	-	ID=TCCCGCATTTTTTGTAGATCAA;Hits=1072;Alias=CELE14B;Class=23H-RNA	TRUE
I	1450910	1450931	15	-	ID=TTCCCGCATTTTTTGTAGATCA;Hits=857;Alias=CELE14B;Class=23H-RNA	TRUE
I	1450910	1450932	76	+	ID=TGATCTACAAAAAATGCGGGAAT;Hits=762;Alias=CELE14B;Class=23H-RNA	TRUE
I	1450910	1450933	23	+	ID=TGATCTACAAAAAATGCGGGAATT;Hits=693;Alias=CELE14B;Class=23H-RNA	TRUE
I	1450911	1450931	5	-	ID=TTCCCGCATTTTTTGTAGATC;Hits=922;Alias=CELE14B;Class=23H-RNA	TRUE
I	1456023	1456046	11	+	ID=TACGGTTTGATCTACAAAAAATGC;Hits=344;Alias=CELE14B;Class=23H-RNA	TRUE
I	1456025	1456047	53	-	ID=CGCATTTTTTGTAGATCAAACCG;Hits=649;Alias=CELE14B;Class=23H-RNA	TRUE
I	1456026	1456047	6	-	ID=CGCATTTTTTGTAGATCAAACC;Hits=732;Alias=CELE14B;Class=23H-RNA	TRUE
I	1456026	1456048	27	-	ID=CCGCATTTTTTGTAGATCAAACC;Hits=693;Alias=CELE14B;Class=23H-RNA	TRUE
I	1456028	1456048	27	-	ID=CCGCATTTTTTGTAGATCAAA;Hits=974;Alias=CELE14B;Class=23H-RNA	TRUE
I	1456028	1456049	25	+	ID=TTTGATCTACAAAAAATGCGGG;Hits=878;Alias=CELE14B;Class=23H-RNA	TRUE
I	1456028	1456050	171	-	ID=TCCCGCATTTTTTGTAGATCAAA;Hits=830;Alias=CELE14B;Class=23H-RNA	TRUE
I	1456029	1456050	78	-	ID=TCCCGCATTTTTTGTAGATCAA;Hits=1072;Alias=CELE14B;Class=23H-RNA	TRUE
I	1456030	1456051	15	-	ID=TTCCCGCATTTTTTGTAGATCA;Hits=857;Alias=CELE14B;Class=23H-RNA	TRUE
I	1456030	1456052	76	+	ID=TGATCTACAAAAAATGCGGGAAT;Hits=762;Alias=CELE14B;Class=23H-RNA	TRUE
I	1456030	1456053	23	+	ID=TGATCTACAAAAAATGCGGGAATT;Hits=693;Alias=CELE14B;Class=23H-RNA	TRUE
I	1456031	1456051	5	-	ID=TTCCCGCATTTTTTGTAGATC;Hits=922;Alias=CELE14B;Class=23H-RNA	TRUE
I	1463845	1463867	67	+	ID=TCCCGCATTTTTCGTAGATCAAA;Hits=98;Alias=CELE14B;Class=23H-RNA	TRUE
I	1463845	1463867	9	-	ID=TTTGATCTACGAAAAATGCGGGA;Hits=98;Alias=CELE14B;Class=23H-RNA	TRUE
I	1463848	1463870	9	+	ID=CGCATTTTTCGTAGATCAAACCG;Hits=57;Alias=CELE14B;Class=23H-RNA	TRUE
I	1477306	1477327	6	-	ID=CGCATTTTTTGTAGATCAACGT;Hits=155;Alias=CELE14B;Class=23H-RNA	TRUE
I	1482687	1482709	76	-	ID=TGATCTACAAAAAATGCGGGAAT;Hits=762;Alias=CELE14B;Class=23H-RNA	TRUE
I	1482689	1482710	78	+	ID=TCCCGCATTTTTTGTAGATCAA;Hits=1072;Alias=CELE14B;Class=23H-RNA	TRUE
I	1486372	1486395	11	+	ID=TACGGTTTGATCTACAAAAAATGC;Hits=344;Alias=CELE14B;Class=23H-RNA	TRUE
I	1486374	1486396	53	-	ID=CGCATTTTTTGTAGATCAAACCG;Hits=649;Alias=CELE14B;Class=23H-RNA	TRUE
I	1486375	1486396	6	-	ID=CGCATTTTTTGTAGATCAAACC;Hits=732;Alias=CELE14B;Class=23H-RNA	TRUE
I	1486375	1486397	27	-	ID=CCGCATTTTTTGTAGATCAAACC;Hits=693;Alias=CELE14B;Class=23H-RNA	TRUE
I	1486377	1486397	27	-	ID=CCGCATTTTTTGTAGATCAAA;Hits=974;Alias=CELE14B;Class=23H-RNA	TRUE
I	1486377	1486398	25	+	ID=TTTGATCTACAAAAAATGCGGG;Hits=878;Alias=CELE14B;Class=23H-RNA	TRUE
I	1486377	1486399	171	-	ID=TCCCGCATTTTTTGTAGATCAAA;Hits=830;Alias=CELE14B;Class=23H-RNA	TRUE
I	1486378	1486399	78	-	ID=TCCCGCATTTTTTGTAGATCAA;Hits=1072;Alias=CELE14B;Class=23H-RNA	TRUE
I	1486379	1486400	15	-	ID=TTCCCGCATTTTTTGTAGATCA;Hits=857;Alias=CELE14B;Class=23H-RNA	TRUE
I	1486379	1486401	76	+	ID=TGATCTACAAAAAATGCGGGAAT;Hits=762;Alias=CELE14B;Class=23H-RNA	TRUE
I	1486379	1486402	23	+	ID=TGATCTACAAAAAATGCGGGAATT;Hits=693;Alias=CELE14B;Class=23H-RNA	TRUE
I	1486380	1486400	5	-	ID=TTCCCGCATTTTTTGTAGATC;Hits=922;Alias=CELE14B;Class=23H-RNA	TRUE
I	1491780	1491802	16	-	ID=TCTCGCCGTCCATCGACTTTAAA;Hits=86;Alias=PALTTAA1;Class=23H-RNA	TRUE
I	1491781	1491802	10	-	ID=TCTCGCCGTCCATCGACTTTAA;Hits=86;Alias=PALTTAA1;Class=23H-RNA	TRUE
I	1491782	1491804	42	+	ID=TAAAGTCGATGGACGGCGAGATT;Hits=85;Alias=PALTTAA1;Class=23H-RNA	TRUE
I	1491783	1491804	43	+	ID=AACAACGAAGCTCCGAAATAACG;Hits=9;Alias=PALTTAA1;Class=23H-RNA	TRUE
I	1494004	1494026	11	+	ID=TACCTGATTTTCATAACGAGACC;Hits=346;Alias=PAL5A;Class=23H-RNA	TRUE
I	1494007	1494029	36	-	ID=AGCGGTCTCGTTATGAAAATCAG;Hits=351;Alias=PAL5A;Class=23H-RNA	TRUE
I	1494009	1494031	22	-	ID=TCAGCGGTCTCGTTATGAAAATC;Hits=354;Alias=PAL5A;Class=23H-RNA	TRUE
I	1494014	1494035	14	-	ID=TTTTTCAGCGGTCTCGTTATGA;Hits=366;Alias=PAL5A;Class=23H-RNA	TRUE
I	1494014	1494036	63	-	ID=CTTTTTCAGCGGTCTCGTTATGA;Hits=354;Alias=PAL5A;Class=23H-RNA	TRUE
I	1494015	1494035	13	-	ID=TTTTTCAGCGGTCTCGTTATG;Hits=368;Alias=PAL5A;Class=23H-RNA	TRUE
I	1494015	1494036	62	-	ID=CTTTTTCAGCGGTCTCGTTATG;Hits=356;Alias=PAL5A;Class=23H-RNA	TRUE
I	1494015	1494037	40	-	ID=ACTTTTTCAGCGGTCTCGTTATG;Hits=355;Alias=PAL5A;Class=23H-RNA	TRUE
I	1494015	1494037	11	+	ID=CATAACGAGACCGCTGAAAAAGT;Hits=355;Alias=PAL5A;Class=23H-RNA	TRUE
I	1494016	1494037	18	+	ID=ATAACGAGACCGCTGAAAAAGT;Hits=371;Alias=PAL5A;Class=23H-RNA	TRUE
I	1494016	1494038	73	+	ID=ATAACGAGACCGCTGAAAAAGTT;Hits=369;Alias=PAL5A;Class=23H-RNA	TRUE
I	1494017	1494038	87	+	ID=TAACGAGACCGCTGAAAAAGTT;Hits=369;Alias=PAL5A;Class=23H-RNA	TRUE
I	1494017	1494039	46	+	ID=TAACGAGACCGCTGAAAAAGTTT;Hits=364;Alias=PAL5A;Class=23H-RNA	TRUE
I	1494018	1494039	24	+	ID=AACGAGACCGCTGAAAAAGTTT;Hits=371;Alias=PAL5A;Class=23H-RNA	TRUE
I	1494115	1494136	24	-	ID=AACGAGACCGCTGAAAAAGTTT;Hits=371;Alias=PAL5A;Class=23H-RNA	TRUE
I	1494115	1494137	46	-	ID=TAACGAGACCGCTGAAAAAGTTT;Hits=364;Alias=PAL5A;Class=23H-RNA	TRUE
I	1494116	1494137	87	-	ID=TAACGAGACCGCTGAAAAAGTT;Hits=369;Alias=PAL5A;Class=23H-RNA	TRUE
I	1494116	1494138	73	-	ID=ATAACGAGACCGCTGAAAAAGTT;Hits=369;Alias=PAL5A;Class=23H-RNA	TRUE
I	1494117	1494138	18	-	ID=ATAACGAGACCGCTGAAAAAGT;Hits=371;Alias=PAL5A;Class=23H-RNA	TRUE
I	1494117	1494139	40	+	ID=ACTTTTTCAGCGGTCTCGTTATG;Hits=355;Alias=PAL5A;Class=23H-RNA	TRUE
I	1494117	1494139	11	-	ID=CATAACGAGACCGCTGAAAAAGT;Hits=355;Alias=PAL5A;Class=23H-RNA	TRUE
I	1494118	1494139	62	+	ID=CTTTTTCAGCGGTCTCGTTATG;Hits=356;Alias=PAL5A;Class=23H-RNA	TRUE
I	1494118	1494140	63	+	ID=CTTTTTCAGCGGTCTCGTTATGA;Hits=354;Alias=PAL5A;Class=23H-RNA	TRUE
I	1494119	1494139	13	+	ID=TTTTTCAGCGGTCTCGTTATG;Hits=368;Alias=PAL5A;Class=23H-RNA	TRUE
I	1494119	1494140	14	+	ID=TTTTTCAGCGGTCTCGTTATGA;Hits=366;Alias=PAL5A;Class=23H-RNA	TRUE
I	1494123	1494145	22	+	ID=TCAGCGGTCTCGTTATGAAAATC;Hits=354;Alias=PAL5A;Class=23H-RNA	TRUE
I	1494125	1494147	36	+	ID=AGCGGTCTCGTTATGAAAATCAG;Hits=351;Alias=PAL5A;Class=23H-RNA	TRUE
I	1494128	1494150	11	-	ID=TACCTGATTTTCATAACGAGACC;Hits=346;Alias=PAL5A;Class=23H-RNA	TRUE
I	1494435	1494456	13	-	ID=TCACGAGGGACGAGGAAAAGTG;Hits=316;Alias=PAL5A;Class=23H-RNA	TRUE
I	1497581	1497604	10	+	ID=TTAAAGTTGATGGACGGCGAGATT;Hits=5;Alias=PALTTAA1;Class=23H-RNA	TRUE
I	1497583	1497604	39	+	ID=AAAGTTGATGGACGGCGAGATT;Hits=5;Alias=PALTTAA1;Class=23H-RNA	TRUE
I	1497622	1497643	43	-	ID=AACAACGAAGCTCCGAAATAACG;Hits=9;Alias=PALTTAA1;Class=23H-RNA	TRUE
I	1497622	1497644	42	-	ID=TAAAGTCGATGGACGGCGAGATT;Hits=85;Alias=PALTTAA1;Class=23H-RNA	TRUE
I	1497624	1497645	10	+	ID=TCTCGCCGTCCATCGACTTTAA;Hits=86;Alias=PALTTAA1;Class=23H-RNA	TRUE
I	1497624	1497646	16	+	ID=TCTCGCCGTCCATCGACTTTAAA;Hits=86;Alias=PALTTAA1;Class=23H-RNA	TRUE
I	1503366	1503386	17	-	ID=TTACCTATCGGCTTTAAATGT;Hits=87;Alias=PALTTAA3;Class=23H-RNA	TRUE
I	1503368	1503388	5	+	ID=ATTTAAAGCCGATAGGTAACC;Hits=91;Alias=PALTTAA3;Class=23H-RNA	TRUE
I	1508621	1508641	116	+	ID=CTCAAAATAATAAAACTGCGT;Hits=97;Alias=PALTA3;Class=23H-RNA	FALSE
I	1508865	1508885	116	-	ID=CTCAAAATAATAAAACTGCGT;Hits=97;Alias=PALTA3;Class=23H-RNA	FALSE
I	1521687	1521709	36	-	ID=AGCGGTCTCGTTATGAAAATCAG;Hits=351;Alias=PAL5A;Class=23H-RNA	TRUE
I	1521689	1521711	22	-	ID=TCAGCGGTCTCGTTATGAAAATC;Hits=354;Alias=PAL5A;Class=23H-RNA	TRUE
I	1521694	1521715	14	-	ID=TTTTTCAGCGGTCTCGTTATGA;Hits=366;Alias=PAL5A;Class=23H-RNA	TRUE
I	1521694	1521716	63	-	ID=CTTTTTCAGCGGTCTCGTTATGA;Hits=354;Alias=PAL5A;Class=23H-RNA	TRUE
I	1521695	1521715	13	-	ID=TTTTTCAGCGGTCTCGTTATG;Hits=368;Alias=PAL5A;Class=23H-RNA	TRUE
I	1521695	1521716	62	-	ID=CTTTTTCAGCGGTCTCGTTATG;Hits=356;Alias=PAL5A;Class=23H-RNA	TRUE
I	1521695	1521717	40	-	ID=ACTTTTTCAGCGGTCTCGTTATG;Hits=355;Alias=PAL5A;Class=23H-RNA	TRUE
I	1521695	1521717	11	+	ID=CATAACGAGACCGCTGAAAAAGT;Hits=355;Alias=PAL5A;Class=23H-RNA	TRUE
I	1521696	1521717	18	+	ID=ATAACGAGACCGCTGAAAAAGT;Hits=371;Alias=PAL5A;Class=23H-RNA	TRUE
I	1521696	1521718	73	+	ID=ATAACGAGACCGCTGAAAAAGTT;Hits=369;Alias=PAL5A;Class=23H-RNA	TRUE
I	1521697	1521718	87	+	ID=TAACGAGACCGCTGAAAAAGTT;Hits=369;Alias=PAL5A;Class=23H-RNA	TRUE
I	1521697	1521719	46	+	ID=TAACGAGACCGCTGAAAAAGTTT;Hits=364;Alias=PAL5A;Class=23H-RNA	TRUE
I	1521698	1521719	24	+	ID=AACGAGACCGCTGAAAAAGTTT;Hits=371;Alias=PAL5A;Class=23H-RNA	TRUE
I	1521796	1521817	24	-	ID=AACGAGACCGCTGAAAAAGTTT;Hits=371;Alias=PAL5A;Class=23H-RNA	TRUE
I	1521796	1521818	46	-	ID=TAACGAGACCGCTGAAAAAGTTT;Hits=364;Alias=PAL5A;Class=23H-RNA	TRUE
I	1521797	1521818	87	-	ID=TAACGAGACCGCTGAAAAAGTT;Hits=369;Alias=PAL5A;Class=23H-RNA	TRUE
I	1521797	1521819	73	-	ID=ATAACGAGACCGCTGAAAAAGTT;Hits=369;Alias=PAL5A;Class=23H-RNA	TRUE
I	1521798	1521819	18	-	ID=ATAACGAGACCGCTGAAAAAGT;Hits=371;Alias=PAL5A;Class=23H-RNA	TRUE
I	1521798	1521820	40	+	ID=ACTTTTTCAGCGGTCTCGTTATG;Hits=355;Alias=PAL5A;Class=23H-RNA	TRUE
I	1521798	1521820	11	-	ID=CATAACGAGACCGCTGAAAAAGT;Hits=355;Alias=PAL5A;Class=23H-RNA	TRUE
I	1521799	1521820	62	+	ID=CTTTTTCAGCGGTCTCGTTATG;Hits=356;Alias=PAL5A;Class=23H-RNA	TRUE
I	1521799	1521821	63	+	ID=CTTTTTCAGCGGTCTCGTTATGA;Hits=354;Alias=PAL5A;Class=23H-RNA	TRUE
I	1521800	1521820	13	+	ID=TTTTTCAGCGGTCTCGTTATG;Hits=368;Alias=PAL5A;Class=23H-RNA	TRUE
I	1521800	1521821	14	+	ID=TTTTTCAGCGGTCTCGTTATGA;Hits=366;Alias=PAL5A;Class=23H-RNA	TRUE
I	1521804	1521826	22	+	ID=TCAGCGGTCTCGTTATGAAAATC;Hits=354;Alias=PAL5A;Class=23H-RNA	TRUE
I	1521806	1521828	36	+	ID=AGCGGTCTCGTTATGAAAATCAG;Hits=351;Alias=PAL5A;Class=23H-RNA	TRUE
I	1521809	1521831	11	-	ID=TACCTGATTTTCATAACGAGACC;Hits=346;Alias=PAL5A;Class=23H-RNA	TRUE
I	1522114	1522135	13	-	ID=TCACGAGGGACGAGGAAAAGTG;Hits=316;Alias=PAL5A;Class=23H-RNA	TRUE
I	1526367	1526389	54	-	ID=ATCGACACAAGCGCTACAGTAGT;Hits=211;Alias=CELE1;Class=23H-RNA	TRUE
I	1526368	1526389	12	-	ID=ATCGACACAAGCGCTACAGTAG;Hits=228;Alias=CELE1;Class=23H-RNA	TRUE
I	1526369	1526390	15	+	ID=TACTGTAGCGCTTGTGTCGATT;Hits=262;Alias=CELE1;Class=23H-RNA	TRUE
I	1526369	1526391	14	+	ID=TACTGTAGCGCTTGTGTCGATTT;Hits=253;Alias=CELE1;Class=23H-RNA	TRUE
I	1531714	1531735	7	-	ID=AAATCACCGTCTAATTTTGAGT;Hits=8;Alias=other;Class=23H-RNA	TRUE
I	1536686	1536708	16	-	ID=TCTCGCCGTCCATCGACTTTAAA;Hits=86;Alias=PALTTAA1;Class=23H-RNA	TRUE
I	1536687	1536708	10	-	ID=TCTCGCCGTCCATCGACTTTAA;Hits=86;Alias=PALTTAA1;Class=23H-RNA	TRUE
I	1536688	1536710	42	+	ID=TAAAGTCGATGGACGGCGAGATT;Hits=85;Alias=PALTTAA1;Class=23H-RNA	TRUE
I	1536689	1536710	43	+	ID=AACAACGAAGCTCCGAAATAACG;Hits=9;Alias=PALTTAA1;Class=23H-RNA	TRUE
I	1538610	1538632	16	-	ID=TCTCGCCGTCCATCGACTTTAAA;Hits=86;Alias=PALTTAA1;Class=23H-RNA	TRUE
I	1538611	1538632	10	-	ID=TCTCGCCGTCCATCGACTTTAA;Hits=86;Alias=PALTTAA1;Class=23H-RNA	TRUE
I	1538612	1538634	42	+	ID=TAAAGTCGATGGACGGCGAGATT;Hits=85;Alias=PALTTAA1;Class=23H-RNA	TRUE
I	1538613	1538634	43	+	ID=AACAACGAAGCTCCGAAATAACG;Hits=9;Alias=PALTTAA1;Class=23H-RNA	TRUE
I	1541953	1541974	7	+	ID=AGCGAAAACTACAGTAATTCTT;Hits=384;Alias=CELE1;Class=23H-RNA	TRUE
I	1542134	1542156	13	-	ID=AGCGAAAACTACAGTAATTCTTT;Hits=342;Alias=CELE1;Class=23H-RNA	TRUE
I	1542135	1542156	7	-	ID=AGCGAAAACTACAGTAATTCTT;Hits=384;Alias=CELE1;Class=23H-RNA	TRUE
I	1542135	1542157	35	-	ID=TAGCGAAAACTACAGTAATTCTT;Hits=331;Alias=CELE1;Class=23H-RNA	TRUE
I	1544136	1544157	6	+	ID=CGCATTTTTTGTAGATCAACGT;Hits=155;Alias=CELE14B;Class=23H-RNA	TRUE
I	1548714	1548736	171	+	ID=TCCCGCATTTTTTGTAGATCAAA;Hits=830;Alias=CELE14B;Class=23H-RNA	TRUE
I	1548715	1548736	25	-	ID=TTTGATCTACAAAAAATGCGGG;Hits=878;Alias=CELE14B;Class=23H-RNA	TRUE
I	1548716	1548736	27	+	ID=CCGCATTTTTTGTAGATCAAA;Hits=974;Alias=CELE14B;Class=23H-RNA	TRUE
I	1548716	1548738	27	+	ID=CCGCATTTTTTGTAGATCAAACC;Hits=693;Alias=CELE14B;Class=23H-RNA	TRUE
I	1548717	1548738	6	+	ID=CGCATTTTTTGTAGATCAAACC;Hits=732;Alias=CELE14B;Class=23H-RNA	TRUE
I	1548717	1548739	53	+	ID=CGCATTTTTTGTAGATCAAACCG;Hits=649;Alias=CELE14B;Class=23H-RNA	TRUE
I	1548718	1548741	11	-	ID=TACGGTTTGATCTACAAAAAATGC;Hits=344;Alias=CELE14B;Class=23H-RNA	TRUE
I	1554217	1554239	13	-	ID=AGCGAAAACTACAGTAATTCTTT;Hits=342;Alias=CELE1;Class=23H-RNA	TRUE
I	1554218	1554239	7	-	ID=AGCGAAAACTACAGTAATTCTT;Hits=384;Alias=CELE1;Class=23H-RNA	TRUE
I	1554218	1554240	35	-	ID=TAGCGAAAACTACAGTAATTCTT;Hits=331;Alias=CELE1;Class=23H-RNA	TRUE
I	1554583	1554604	25	-	ID=TTTGATCTACAAAAAATGCGGG;Hits=878;Alias=CELE14B;Class=23H-RNA	TRUE
I	1554584	1554604	27	+	ID=CCGCATTTTTTGTAGATCAAA;Hits=974;Alias=CELE14B;Class=23H-RNA	TRUE
I	1554584	1554606	27	+	ID=CCGCATTTTTTGTAGATCAAACC;Hits=693;Alias=CELE14B;Class=23H-RNA	TRUE
I	1554585	1554606	6	+	ID=CGCATTTTTTGTAGATCAAACC;Hits=732;Alias=CELE14B;Class=23H-RNA	TRUE
I	1554585	1554607	53	+	ID=CGCATTTTTTGTAGATCAAACCG;Hits=649;Alias=CELE14B;Class=23H-RNA	TRUE
I	1555371	1555392	6	-	ID=CGCATTTTTTGTAGATCAACGT;Hits=155;Alias=CELE14B;Class=23H-RNA	TRUE
I	1555471	1555492	25	-	ID=TTTGATCTACAAAAAATGCGGG;Hits=878;Alias=CELE14B;Class=23H-RNA	TRUE
I	1555472	1555492	27	+	ID=CCGCATTTTTTGTAGATCAAA;Hits=974;Alias=CELE14B;Class=23H-RNA	TRUE
I	1555472	1555494	27	+	ID=CCGCATTTTTTGTAGATCAAACC;Hits=693;Alias=CELE14B;Class=23H-RNA	TRUE
I	1555473	1555494	6	+	ID=CGCATTTTTTGTAGATCAAACC;Hits=732;Alias=CELE14B;Class=23H-RNA	TRUE
I	1555473	1555495	53	+	ID=CGCATTTTTTGTAGATCAAACCG;Hits=649;Alias=CELE14B;Class=23H-RNA	TRUE
I	1555474	1555497	11	-	ID=TACGGTTTGATCTACAAAAAATGC;Hits=344;Alias=CELE14B;Class=23H-RNA	TRUE
I	1564307	1564328	78	-	ID=TCCCGCATTTTTTGTAGATCAA;Hits=1072;Alias=CELE14B;Class=23H-RNA	TRUE
I	1564308	1564329	15	-	ID=TTCCCGCATTTTTTGTAGATCA;Hits=857;Alias=CELE14B;Class=23H-RNA	TRUE
I	1564308	1564330	76	+	ID=TGATCTACAAAAAATGCGGGAAT;Hits=762;Alias=CELE14B;Class=23H-RNA	TRUE
I	1564309	1564329	5	-	ID=TTCCCGCATTTTTTGTAGATC;Hits=922;Alias=CELE14B;Class=23H-RNA	TRUE
I	1564403	1564424	78	+	ID=TCCCGCATTTTTTGTAGATCAA;Hits=1072;Alias=CELE14B;Class=23H-RNA	TRUE
I	1564406	1564427	6	+	ID=CGCATTTTTTGTAGATCAACGT;Hits=155;Alias=CELE14B;Class=23H-RNA	TRUE
I	1564621	1564642	6	+	ID=CGCATTTTTTGTAGATCAACGT;Hits=155;Alias=CELE14B;Class=23H-RNA	TRUE
I	1567142	1567163	6	-	ID=CGCATTTTTTGTAGATCAACGT;Hits=155;Alias=CELE14B;Class=23H-RNA	TRUE
I	1567145	1567166	78	-	ID=TCCCGCATTTTTTGTAGATCAA;Hits=1072;Alias=CELE14B;Class=23H-RNA	TRUE
I	1569805	1569827	36	-	ID=AGCGGTCTCGTTATGAAAATCAG;Hits=351;Alias=PAL5A;Class=23H-RNA	TRUE
I	1569807	1569829	22	-	ID=TCAGCGGTCTCGTTATGAAAATC;Hits=354;Alias=PAL5A;Class=23H-RNA	TRUE
I	1569812	1569833	14	-	ID=TTTTTCAGCGGTCTCGTTATGA;Hits=366;Alias=PAL5A;Class=23H-RNA	TRUE
I	1569812	1569834	63	-	ID=CTTTTTCAGCGGTCTCGTTATGA;Hits=354;Alias=PAL5A;Class=23H-RNA	TRUE
I	1569813	1569833	13	-	ID=TTTTTCAGCGGTCTCGTTATG;Hits=368;Alias=PAL5A;Class=23H-RNA	TRUE
I	1569813	1569834	62	-	ID=CTTTTTCAGCGGTCTCGTTATG;Hits=356;Alias=PAL5A;Class=23H-RNA	TRUE
I	1569813	1569835	40	-	ID=ACTTTTTCAGCGGTCTCGTTATG;Hits=355;Alias=PAL5A;Class=23H-RNA	TRUE
I	1569813	1569835	11	+	ID=CATAACGAGACCGCTGAAAAAGT;Hits=355;Alias=PAL5A;Class=23H-RNA	TRUE
I	1569814	1569835	18	+	ID=ATAACGAGACCGCTGAAAAAGT;Hits=371;Alias=PAL5A;Class=23H-RNA	TRUE
I	1569814	1569836	73	+	ID=ATAACGAGACCGCTGAAAAAGTT;Hits=369;Alias=PAL5A;Class=23H-RNA	TRUE
I	1569815	1569836	87	+	ID=TAACGAGACCGCTGAAAAAGTT;Hits=369;Alias=PAL5A;Class=23H-RNA	TRUE
I	1569815	1569837	46	+	ID=TAACGAGACCGCTGAAAAAGTTT;Hits=364;Alias=PAL5A;Class=23H-RNA	TRUE
I	1569816	1569837	24	+	ID=AACGAGACCGCTGAAAAAGTTT;Hits=371;Alias=PAL5A;Class=23H-RNA	TRUE
I	1569915	1569936	24	-	ID=AACGAGACCGCTGAAAAAGTTT;Hits=371;Alias=PAL5A;Class=23H-RNA	TRUE
I	1569915	1569937	46	-	ID=TAACGAGACCGCTGAAAAAGTTT;Hits=364;Alias=PAL5A;Class=23H-RNA	TRUE
I	1569916	1569937	87	-	ID=TAACGAGACCGCTGAAAAAGTT;Hits=369;Alias=PAL5A;Class=23H-RNA	TRUE
I	1569916	1569938	73	-	ID=ATAACGAGACCGCTGAAAAAGTT;Hits=369;Alias=PAL5A;Class=23H-RNA	TRUE
I	1569917	1569938	18	-	ID=ATAACGAGACCGCTGAAAAAGT;Hits=371;Alias=PAL5A;Class=23H-RNA	TRUE
I	1569917	1569939	40	+	ID=ACTTTTTCAGCGGTCTCGTTATG;Hits=355;Alias=PAL5A;Class=23H-RNA	TRUE
I	1569917	1569939	11	-	ID=CATAACGAGACCGCTGAAAAAGT;Hits=355;Alias=PAL5A;Class=23H-RNA	TRUE
I	1569918	1569939	62	+	ID=CTTTTTCAGCGGTCTCGTTATG;Hits=356;Alias=PAL5A;Class=23H-RNA	TRUE
I	1569918	1569940	63	+	ID=CTTTTTCAGCGGTCTCGTTATGA;Hits=354;Alias=PAL5A;Class=23H-RNA	TRUE
I	1569919	1569939	13	+	ID=TTTTTCAGCGGTCTCGTTATG;Hits=368;Alias=PAL5A;Class=23H-RNA	TRUE
I	1569919	1569940	14	+	ID=TTTTTCAGCGGTCTCGTTATGA;Hits=366;Alias=PAL5A;Class=23H-RNA	TRUE
[truncated: 23,704 more rows]
