# Supplementary material for: A low-abundance class of Dicer-dependent siRNAs produced from a variety of features in C. elegans
Source: HighWire-hosted journal article supplement (doi:10.1101/gr.279083.124), 2024-12-01
Supplement: Supplemental_Table_S2.xlsx [file Supplemental_Table_S2.xlsx]

## Sheet: Table S2
Supplemental Table S2. Geometric mean-normalized 23H-RNA sRNA-seq read counts and statistical analysis for pash-1(ram33) and wild type gravid adults.
Feature ID	Feature Name	wt rep 1	wt rep 2	wt rep 3	pash-1 rep 1	pash-1 rep 2	pash-1 rep 3	log2 fold change	lfc SE	stat	p-value	adjusted p-value
AGTGGAGTGGATGACGACGACGA	Y57G11C.1145_hairpin	1265.13	1513.48	1511.06	76.9036	66.4463	54.6482	-4.4353	0.153509	-28.8927	1.47517e-183	1.4942e-179
TGGAGTGGATGACGACGACGA	Y57G11C.1145_hairpin	210.387	189.692	203.117	15.5443	10.3553	14.1028	-3.91057	0.292847	-13.3536	1.12806e-40	5.71307e-38
TGTATTAAACGGTAAGGGCCGGC	mir-5592	2294.62	2032.85	2308.14	952.296	851.721	840.877	-1.32626	0.102321	-12.9618	2.01518e-38	9.27806e-36
AGTGGAGTGGATGACGACGACG	Y57G11C.1145_hairpin, Y57G11C.51	568.045	515.314	623.711	224.166	244.212	219.474	-1.31135	0.138806	-9.44741	3.47327e-21	9.0207e-19
TGGAGTGGATGACGACGACGAT	Y57G11C.1145_hairpin	187.946	192.736	171.315	35.9974	43.1469	18.5099	-2.49541	0.267116	-9.34204	9.44995e-21	2.39296e-18
GTATTAAACGGTAAGGGCCGGC	mir-5592	913.08	762.827	814.518	460.604	364.16	369.316	-1.05792	0.132759	-7.96872	1.6032e-15	2.75234e-13
CGGCCCTTACCGTTTAATACA	mir-5592	196.361	188.678	174.393	59.723	65.5834	47.5968	-1.69133	0.219667	-7.69953	1.36567e-14	2.16139e-12
TTTGCCGATGTTTCTGAGATGTCT	F43E2.6	555.422	530.53	489.326	1098.74	926.796	906.984	0.898601	0.121222	7.41283	1.23628e-13	1.84151e-11
TATTAAACGGTAAGGGCCGGC	mir-5592	203.374	206.937	189.781	74.4492	81.1163	79.328	-1.35313	0.197631	-6.84676	7.55431e-12	9.5647e-10
CATCTCAGAAACATCGGCAAATG	F43E2.6	886.431	782.1	892.482	1297.54	1410.04	1396.17	0.681146	0.104453	6.52109	6.97974e-11	8.22067e-09
CGGCCCTTACCGTTTAATACATG	mir-5592	147.271	158.246	148.747	65.4499	73.3498	53.7668	-1.23844	0.225692	-5.48729	4.08147e-08	3.62642e-06
TTAAACGGTAAGGGCCGGCTGG	mir-5592	137.453	153.174	135.411	70.3586	50.9134	52.8854	-1.28963	0.237068	-5.43991	5.33065e-08	4.61488e-06
TGGAGTGGATGACGACGACGATG	Y57G11C.1145_hairpin	68.7265	49.7055	51.2921	15.5443	11.2182	9.69565	-2.20728	0.409433	-5.39106	7.00427e-08	5.91219e-06
TATTAAACGGTAAGGGCCGGCT	mir-5592	92.5703	141.001	86.1706	31.9068	34.5176	43.1897	-1.55032	0.296285	-5.23252	1.67213e-07	1.37699e-05
TGCCGATGTTTCTGAGATGTCT	F43E2.6	54.7007	63.907	77.9639	143.172	134.618	178.929	1.20653	0.238473	5.05941	4.20548e-07	3.22707e-05
TTTGCCGATGTTTCTGAGATGTC	F43E2.6	13170.2	11263.9	10226.6	17493.9	15908.3	15871.8	0.507838	0.101019	5.02717	4.97762e-07	3.79085e-05
TATTAAACGGTAAGGGCCGGCTG	mir-5592	107.999	91.2958	88.2223	34.3612	41.4211	37.9012	-1.33479	0.277671	-4.8071	1.53134e-06	0.000108468
GGCCCTTACCGTTTAATACATG	mir-5592	56.1032	51.7343	62.5763	12.2719	15.5329	20.2727	-1.82973	0.3835	-4.77114	1.83186e-06	0.000125514
ATCGGACGAGCTCTTATCCCCT	T05E12.8	28.0516	37.5327	28.7235	80.9942	75.0757	89.9051	1.37518	0.308023	4.46455	8.02369e-06	0.000475865
ATTGTGAAGACATCTCAGAAAC	F43E2.6	91.1678	87.2382	74.8864	182.442	143.248	158.656	0.940127	0.216666	4.33906	1.43093e-05	0.000775075
GGTGGAGTGGATGACGACGACGA	Y57G11C.1145_hairpin	14.0258	11.1584	31.8011	0.818124	1.72588	0.881423	-4.06662	0.976165	-4.16591	3.10112e-05	0.00157056
TGAAGAGGCAGGGTCCGGTTGCG	Y57G11C.1145_hairpin	51.8955	54.7775	37.9561	92.448	138.07	91.668	1.15912	0.28527	4.06324	4.83956e-05	0.00241477
AGTGGAGTGGATGACGACGACGG	Y57G11C.51	133.245	5.07199	68.7313	1.63625	0.862939	0	-6.35488	1.56855	-4.05145	5.09018e-05	0.00252737
TCGAGAAATGACGAGAAATTCAC	Unknown_RE4	11.2206	10.144	26.6719	63.8136	44.8728	53.7668	1.73978	0.430683	4.0396	5.35429e-05	0.00260739
TTTGCCGATGTTTCTGAGATGT	F43E2.6	889.236	877.454	767.329	1335.18	1077.81	1113.24	0.478038	0.118453	4.03568	5.44451e-05	0.00263863
TTTTTTCTGTATTCTTATTTTT	F52G3.8	14.0258	20.2879	15.3876	58.9049	38.8323	56.4111	1.62212	0.407408	3.98156	6.84639e-05	0.00327109
TGCCGATGTTTCTGAGATGTCTT	F43E2.6	18.2336	22.3167	52.3179	109.629	77.6645	69.6324	1.44929	0.369109	3.92644	8.62118e-05	0.00402415
TAGACGGTGTGGGTCAACGAGC	T05E12.8	127.635	109.555	92.3257	211.894	178.628	177.166	0.793337	0.202716	3.91354	9.09527e-05	0.00420667
CCGGCCCTTACCGTTTAATACA	mir-5592	40.6748	27.3887	18.4651	4.90874	5.17763	7.9328	-2.25425	0.582606	-3.86925	0.00010917	0.00494292
CACGGGGCGATCCAAGAACCT	Y81B9A.5	14.0258	15.216	10.2584	47.4512	59.5428	28.2055	1.78015	0.461113	3.86055	0.000113131	0.0050518
ATGAAGAGGCAGGGTCCGGTTGC	Y57G11C.1145_hairpin	75.7394	68.979	86.1706	123.537	144.974	145.435	0.840949	0.225782	3.72461	0.000195617	0.00825587
TGTATTAAACGGTAAGGGCCG	mir-5592	84.1548	50.7199	73.8606	35.9974	21.5735	28.2055	-1.27369	0.343305	-3.71009	0.000207182	0.00870767
ATTTGCCGATGTTTCTGAGATGT	F43E2.6	44.8826	26.3743	42.0595	89.9936	69.0351	87.2609	1.13193	0.309872	3.65289	0.000259304	0.0105059
ACATCTCAGAAACATCGGCAAAT	F43E2.6	4.20774	15.216	7.18089	29.4524	30.2029	44.0711	1.92254	0.537011	3.58008	0.000343483	0.0133136
ATTTGCCGATGTTTCTGAGATGTC	F43E2.6	40.6748	25.3599	25.646	61.3593	75.0757	64.3439	1.15147	0.334145	3.44602	0.000568905	0.019667
GTATTAAACGGTAAGGGCCGGCT	mir-5592	35.0645	42.6047	42.0595	8.18124	19.8476	14.1028	-1.51508	0.44826	-3.37992	0.000725057	0.0241582
TCAATGACGGAGTCGAGATCGAC	Y37E11B.2	35.0645	44.6335	22.5685	104.72	75.0757	52.8854	1.18863	0.353338	3.36401	0.000768182	0.0254278
CGGCCCTTACCGTTTAATACAT	mir-5592	61.7136	87.2382	81.0414	29.4524	49.1875	34.3755	-1.03328	0.313798	-3.29284	0.000991816	0.0318924
CACGATCAGAAGGGATGTCACT	E01G4.7	14.0258	32.4607	8.20673	36.8156	53.5022	66.1067	1.50099	0.460441	3.25989	0.00111456	0.0353471
GAAGACATCTCAGAAACATCGGC	F43E2.6	5.61032	2.02879	7.18089	18.8168	29.3399	15.8656	2.12354	0.685098	3.09962	0.00193772	0.0546719
TTTGCCGATGTTTCTGAGATG	F43E2.6	287.529	208.966	211.323	385.336	305.48	322.601	0.525881	0.170382	3.08648	0.00202545	0.0563619
GATGATGGCGTGGAAGAAGTTGA	Y57G11C.1145_hairpin	26.649	36.5183	37.9561	91.6298	60.4057	54.6482	1.0215	0.337813	3.02387	0.00249564	0.0644855
GATGATGGCGTGGAAGAAGTTG	Y57G11C.1145_hairpin	5.61032	6.08638	5.12921	34.3612	12.9441	18.5099	1.97014	0.664827	2.96339	0.0030427	0.0740852
TACAACGTGGAGCTAAGACACCC	F55C9.3	5.61032	27.3887	8.20673	43.3605	39.6952	34.3755	1.47663	0.512023	2.88392	0.00392755	0.0895827
ATTAAACGGTAAGGGCCGGCTGG	mir-5592	23.8439	29.4175	51.2921	11.4537	13.807	17.6285	-1.29863	0.47335	-2.74349	0.00607896	0.124896
ATTCGGGAATTAGTTGTCGACA	T05E12.8	79.9471	69.9934	68.7313	130.9	99.238	111.941	0.65149	0.240335	2.71076	0.00671287	0.131939
TACAACGTGGAGCTAAGACACC	F55C9.3	5.61032	6.08638	1.02584	18.8168	24.1623	8.81423	2.04973	0.774734	2.64572	0.00815163	0.152339
TTGCCGATGTTTCTGAGATGTCT	F43E2.6	19.6361	21.3023	10.2584	43.3605	33.6546	36.1383	1.15386	0.441122	2.61574	0.00890337	0.16104
TTGTGAAGACATCTCAGAAAC	F43E2.6	33.6619	25.3599	15.3876	57.2686	37.9693	50.2411	0.988122	0.393996	2.50795	0.0121435	0.200002
ATGATGGCGTGGAAGAAGTTGA	Y57G11C.1145_hairpin	2.80516	9.12958	6.15505	20.4531	18.1217	18.5099	1.61834	0.651412	2.48436	0.0129784	0.208334
CCTTCTACTTGGACGGAACAGCC	Y17D7C.3	1.40258	5.07199	6.15505	23.7256	18.1217	7.05138	1.90791	0.781073	2.44267	0.014579	0.224083
TTTTGCTGATCTCTCTTCTCGG	ChrIII_hairpin1	36.4671	34.4895	17.4393	63.8136	44.8728	53.7668	0.891276	0.371064	2.40195	0.016308	0.240793
ATCGTCGTCGTCATCCACTCCA	Y57G11C.1145_hairpin	18.2336	9.12958	32.8269	12.2719	4.31469	1.76285	-1.70492	0.727238	-2.34438	0.0190589	0.266273
CGATGGCTGCGGCGAGGATGATG	Y57G11C.1145_hairpin	11.2206	10.144	19.491	32.7249	35.3805	22.917	1.14618	0.491652	2.33128	0.0197384	0.272721
ATTGTGAAGACATCTCAGAAACA	F43E2.6	25.2465	11.1584	9.23257	35.1793	27.614	33.4941	1.11778	0.487506	2.29285	0.0218567	0.286131
CATGTATTAAACGGTAAGGGCC	mir-5592	89.7652	81.1518	87.1965	67.9043	53.5022	46.7154	-0.614682	0.269816	-2.27815	0.0227177	0.291832
GAGTGGATGACGACGACGATGGC	Y57G11C.1145_hairpin	25.2465	18.2592	21.5427	8.99936	10.3553	7.9328	-1.24594	0.552638	-2.25454	0.0241621	0.302145
TGAAGAGGCAGGGTCCGGTTGC	Y57G11C.1145_hairpin	51.8955	28.4031	60.5246	92.448	83.7051	57.2925	0.735637	0.328125	2.24194	0.0249653	0.307259
CATCTCAGAAACATCGGCAAAT	F43E2.6	12.6232	4.05759	13.3359	24.5437	26.7511	20.2727	1.27208	0.568854	2.23622	0.0253376	0.309716
TTAAACGGTAAGGGCCGGCTG	mir-5592	53.2981	60.8638	57.4471	31.0887	32.7917	40.5454	-0.721007	0.322649	-2.23465	0.0254402	0.309716
TGGATGATGGCGTGGAAGAAGTTG	Y57G11C.1145_hairpin	7.0129	3.04319	14.3618	31.0887	16.3958	17.6285	1.40996	0.639368	2.20524	0.027437	0.323904
AATCGGGATGGATCGATGGATT	T05E12.10	16.831	12.1728	1.02584	32.7249	20.7105	22.0356	1.36783	0.629962	2.1713	0.0299087	0.339459
AGTCAGTTGGATGGGAAAATG	W04B5.8	5.61032	4.05759	5.12921	10.6356	15.5329	16.747	1.54525	0.727212	2.1249	0.0335954	0.363167
TCCGGTTCAGAGCAGATGACA	Y17D7C.3	39.2723	49.7055	21.5427	81.8124	52.6393	52.8854	0.76534	0.361515	2.11704	0.0342567	0.368351
AACTTCTTCCACGCCATCATCC	Y57G11C.1145_hairpin	7.0129	3.04319	7.18089	22.9075	8.62939	16.747	1.50405	0.717437	2.09642	0.036045	0.374877
ACATCTCAGAAACATCGGCAAATG	F43E2.6	4.20774	6.08638	2.05168	12.2719	14.67	11.4585	1.6375	0.787248	2.08003	0.0375229	0.383908
GTGGAGTGGATGACGACGACGA	Y57G11C.1145_hairpin	22.4413	31.4463	13.3359	9.81748	7.76645	12.3399	-1.16909	0.565478	-2.06743	0.038694	0.391753
ACGTGTTCCAGCATTCTTCGAC	Y37E3.30	5.61032	11.1584	9.23257	17.9987	17.2588	25.5613	1.20101	0.590119	2.0352	0.0418309	0.406722
CTAATCGTCCCGATCCTTTCATC	ChrX_intergenic1	4.20774	6.08638	4.10336	17.1806	6.04057	19.3913	1.5566	0.768829	2.02464	0.0429043	0.412428
TTTTTTCTGTATTCTTATTTTTC	F52G3.8	2.80516	7.10078	9.23257	19.635	15.5329	14.1028	1.32782	0.672404	1.97473	0.0482988	0.442332
CAAGTGCGACATAAAGGGAACA	T05E12.10	8.41548	19.2736	12.3101	31.0887	27.614	22.0356	0.991409	0.505997	1.95932	0.0500758	0.449489
GCCCTTACCGTTTAATACATG	mir-5592	25.2465	23.3311	56.4213	15.5443	27.614	12.3399	-0.928153	0.488535	-1.89987	0.0574503	0.472371
ATCTCAGAAACATCGGCAAATG	F43E2.6	32.2594	42.6047	45.137	77.7217	43.1469	64.3439	0.617703	0.334876	1.84458	0.0650993	0.495376
TGTATTAAACGGTAAGGGCCGG	mir-5592	50.4929	28.4031	80.0156	34.3612	28.477	33.4941	-0.722804	0.390242	-1.85219	0.0639983	0.495376
AACTTCTTCCACGCCATCATCCA	Y57G11C.1145_hairpin	19.6361	9.12958	9.23257	26.18	31.9287	14.9842	0.977062	0.549137	1.77927	0.0751956	0.523705
CCCCATTGCCGAATGTTTGAATC	Y37E3.30	2.80516	9.12958	6.15505	19.635	14.67	9.69565	1.24932	0.713276	1.75152	0.0798559	0.53485
TGATGCGGTTGTTCCAAAGAATC	F55A4.9, rncs-1	19.6361	37.5327	11.2843	49.9055	29.3399	39.664	0.79025	0.455814	1.73371	0.0829693	0.539753
ATGACGACGACGATGGCTGCGGC	Y57G11C.1145_hairpin	2.80516	8.11518	10.2584	22.9075	7.76645	19.3913	1.20695	0.696392	1.73314	0.0830703	0.539807
CATCCCGATCGTTCGTCGTCGCC	ChrX_intergenic1	1.40258	8.11518	11.2843	18.8168	11.2182	19.3913	1.20138	0.694105	1.73083	0.0834826	0.542048
TGGATGATGGCGTGGAAGAAGTT	Y57G11C.1145_hairpin	12.6232	13.1872	20.5168	27.8162	35.3805	20.2727	0.839726	0.486929	1.72453	0.0846114	0.544145
AGTAATATACCGCTACACCAACC	ChrII_intergenic1	11.2206	22.3167	18.4651	29.4524	36.2434	24.6798	0.77704	0.462035	1.68178	0.0926122	0.565784
CATGTATTAAACGGTAAGGGCCG	mir-5592	22.4413	34.4895	13.3359	14.7262	15.5329	6.16996	-0.946669	0.565648	-1.6736	0.0942091	0.569358
CACTTACCAGCACACAGAGACG	Y57G11C.51	9.81807	10.144	12.3101	23.7256	21.5735	14.9842	0.897741	0.557658	1.60984	0.107432	0.596774
AGACGCAGGGCTGGTCGCGATG	Y57G11C.51	4.20774	9.12958	4.10336	12.2719	18.9847	8.81423	1.18153	0.736775	1.60365	0.10879	0.598229
ATTCGGGAATTAGTTGTCGAC	T05E12.8	4.20774	7.10078	5.12921	14.7262	12.0811	10.5771	1.17033	0.731177	1.60061	0.109463	0.598675
TTAAACGGTAAGGGCCGGCTGGG	mir-5592	19.6361	14.2016	17.4393	15.5443	6.04057	2.64427	-1.06716	0.674127	-1.58303	0.113415	0.604256
TTGCCAAATGGACGTACAGATC	Y105C5A.14	5.61032	10.144	11.2843	23.7256	13.807	15.8656	0.960503	0.610055	1.57445	0.115383	0.608812
ATCGGACGAGCTCTTATCCCCTC	T05E12.8	11.2206	18.2592	12.3101	25.3618	25.0252	22.0356	0.781426	0.500268	1.56202	0.118284	0.618533
TTTGGCATCGCCCGTGGTATTCC	T05E12.8	44.8826	90.2814	29.7494	40.0881	37.1064	33.4941	-0.580528	0.391911	-1.48127	0.138533	0.656624
ATGGCTGCGGCGAGGATGATGTG	Y57G11C.1145_hairpin	57.5058	28.4031	40.0078	68.7224	51.7763	54.6482	0.495353	0.337147	1.46925	0.141765	0.662233
TGTATTAAACGGTAAGGGCCGGCT	mir-5592	1.40258	18.2592	21.5427	7.36311	3.45176	7.9328	-1.16185	0.800349	-1.45169	0.146589	0.668245
CTCCTCGGTCTTGACGAAATCC	C36A4.14	14.0258	5.07199	1.02584	14.7262	11.2182	14.9842	1.08729	0.767214	1.41719	0.156428	0.679292
AATCGGAAACTCAAAGACCACAC	Y17D7C.3	7.0129	8.11518	4.10336	8.99936	11.2182	18.5099	1.01267	0.71974	1.407	0.159428	0.680926
TTTTTTGGCACCGCTGTTCTGC	F55A4.9, rncs-1	7.0129	42.6047	15.3876	35.9974	31.0658	41.4269	0.710491	0.504551	1.40817	0.159082	0.680926
TAGTTTTGATGACTGGATCTACC	Y116F11A.1	11.2206	8.11518	3.07752	12.2719	12.9441	16.747	0.934283	0.688096	1.35778	0.174533	0.697651
AGACGCGCGCACTCCCAACTCG	TC5A	36.4671	17.2448	16.4135	8.99936	16.3958	16.747	-0.716213	0.537238	-1.33314	0.182486	0.702281
CTCTTACTGTAGTTTTCGCTAAG	PALTA4	23.8439	8.11518	4.10336	7.36311	5.17763	4.40711	-1.05155	0.800473	-1.31366	0.18896	0.712919
TCTCGTAGAACGTGTCGCTTCG	F55A4.9, rncs-1	14.0258	13.1872	10.2584	4.90874	5.17763	9.69565	-0.920449	0.699579	-1.31572	0.188269	0.712919
TTGCCGATGTTTCTGAGATGTC	F43E2.6	40.6748	32.4607	14.3618	53.9962	41.4211	29.9684	0.538086	0.42266	1.27309	0.202985	0.727798
CAATAAAAACAATGGACAACTG	Y59H11AR.6	5.61032	9.12958	9.23257	19.635	10.3553	13.2213	0.834054	0.658081	1.2674	0.205011	0.728874
AACCGGACCCTGCCTCTTCATC	Y57G11C.1145_hairpin	5.61032	14.2016	19.491	19.635	27.614	17.6285	0.692848	0.554956	1.24847	0.211858	0.734649
TGCCGATGTTTCTGAGATGTC	F43E2.6	4.20774	11.1584	5.12921	14.7262	12.0811	11.4585	0.87737	0.706837	1.24126	0.214509	0.735894
GAGTGGGGACTGTCGCTTCGA	F31C3.7, F31C3.8, rrn-1.1, rrn-1.2	2.80516	18.2592	19.491	9.81748	6.04057	6.16996	-0.904866	0.73678	-1.22814	0.219396	0.741991
CGTCTGGTTCAGGGTTGTTTA	F31C3.11, rrn-2.1	1.40258	8.11518	14.3618	13.09	12.9441	17.6285	0.826468	0.703897	1.17413	0.240342	0.762904
AATTGTGAAGACATCTCAGAAAC	F43E2.6	107.999	132.886	89.2482	129.264	134.618	130.451	0.255183	0.218671	1.16697	0.243223	0.76502
AAGACATCTCAGAAACATCGGC	F43E2.6	2.80516	5.07199	10.2584	13.09	12.9441	7.9328	0.875663	0.76069	1.15114	0.249673	0.766321
TCCCCGTCAACATAAACTTTTT	TC5	67.3239	38.5471	71.8089	81.8124	83.7051	59.9367	0.350644	0.302965	1.15738	0.247119	0.766321
AGCAGAAACTATATGGAACAT	F39E9.29_region	4.20774	8.11518	8.20673	10.6356	17.2588	8.81423	0.815045	0.713868	1.14173	0.253566	0.768092
TCCGATCTGGCAAGTTAAGCAA	rrn-4_RE	16.831	12.1728	10.2584	25.3618	10.3553	24.6798	0.637588	0.564911	1.12865	0.259045	0.772905
CCAAACTGGATTGACGAGCATCG	F55A4.9, rncs-1	16.831	16.2304	10.2584	8.99936	14.67	1.76285	-0.760147	0.710523	-1.06984	0.284691	0.789188
TGCTTTCCTCATCTCTGATCTTT	F55A4.9, rncs-1	14.0258	29.4175	28.7235	14.7262	23.2994	12.3399	-0.535694	0.505951	-1.05879	0.289697	0.792068
CGCGCGCCGCTATGTTTAACT	PALTA3	11.2206	13.1872	11.2843	19.635	19.8476	14.1028	0.583805	0.556114	1.04979	0.293813	0.79376
CTCTCGTAGAACGTGTCGCTTCG	F55A4.9, rncs-1	8.41548	18.2592	6.15505	11.4537	2.58882	4.40711	-0.833293	0.805852	-1.03405	0.301112	0.797601
CAATGGAGCGGTGTAAACTTTTC	E01G4.7	23.8439	12.1728	11.2843	11.4537	8.62939	10.5771	-0.602056	0.60802	-0.990191	0.322081	0.808734
GGTGGAGTGGATGACGACGACG	Y57G11C.1145_hairpin	18.2336	11.1584	10.2584	12.2719	18.1217	26.4427	0.537292	0.563672	0.9532	0.340489	0.819974
TCTCAATGGAAAATTCTGCATG	F31A9.2	5.61032	4.05759	14.3618	8.99936	12.9441	15.8656	0.636822	0.711316	0.895273	0.370641	0.831836
TTGTGTCGACAACTAATTCCCGA	T05E12.8	19.6361	17.2448	19.491	27.8162	17.2588	29.087	0.398598	0.469708	0.848607	0.3961	0.842701
CCGCATTTTTTGTAGATCAAA	CELE14B	8.41548	18.2592	13.3359	8.99936	13.807	4.40711	-0.569925	0.673929	-0.845674	0.397735	0.844405
ACGTGTCGCTTCGTCATCTGATG	F55A4.9, rncs-1	29.4542	34.4895	14.3618	12.2719	26.7511	19.3913	-0.420632	0.498024	-0.844601	0.398333	0.844453
CTTAGGTCACTGGTTCGAATCC	other	15.4284	7.10078	2.05168	11.4537	15.5329	8.81423	0.588018	0.745781	0.78846	0.430428	0.860577
TAAACATAGCGGCGCGCGGAACC	PALTA3	21.0387	6.08638	22.5685	28.6343	13.807	23.7984	0.428922	0.557102	0.769917	0.441349	0.864505
AATTCTCTCGTAGAACGTGTCGCT	F55A4.9, rncs-1	12.6232	15.216	6.15505	4.90874	6.04057	12.3399	-0.54581	0.724951	-0.752893	0.451514	0.870148
AGTGTAGTCAGCTGAAGAGACA	rft-2, Y47D7A.14_IR, Y47D7A.14_IR_element	7.0129	15.216	22.5685	23.7256	7.76645	29.9684	0.434094	0.600581	0.72279	0.469809	0.880243
TCAACAGACTGATGGACGATG	C36A4.14	54.7007	53.7631	26.6719	54.8143	41.4211	63.4624	0.249438	0.350874	0.710906	0.477142	0.880484
TTCTCTCGTAGAACGTGTCGCTT	F55A4.9, rncs-1	15.4284	38.5471	4.10336	15.5443	13.807	14.1028	-0.42527	0.642692	-0.6617	0.508163	0.896294
TTTCTGAGATGTCTTCACAATTC	F43E2.6	9.81807	9.12958	10.2584	22.0893	12.0811	5.28854	0.439503	0.682344	0.644107	0.519506	0.901817
ATTAAACGGTAAGGGCCGGCTG	mir-5592	11.2206	9.12958	15.3876	13.09	6.90351	7.05138	-0.400349	0.669667	-0.597833	0.549951	0.913581
ATTCCACTTGCATCATACGACG	F52D2.6	7.0129	8.11518	21.5427	7.36311	10.3553	10.5771	-0.393166	0.684644	-0.574263	0.56579	0.918045
CCTTTCGGAGTGATAGCGATAAC	Y116A8B.1	33.6619	23.3311	15.3876	22.9075	12.9441	22.917	-0.283188	0.490037	-0.577891	0.563337	0.918045
CGTGTCGCTTCGTCATCTGATGC	F55A4.9, rncs-1	14.0258	11.1584	4.10336	11.4537	3.45176	6.16996	-0.452392	0.788938	-0.573418	0.566362	0.918045
TCCTTCGATGTCGGCTCTTCC	F31C3.10, F31C3.9, rrn-3.1, rrn-3.56	11.2206	8.11518	9.23257	6.54499	6.04057	8.81423	-0.409376	0.727527	-0.562696	0.573642	0.918739
CACTAATAGGGAACGTGAGCT	F31C3.10, F31C3.9, rrn-3.1, rrn-3.56	12.6232	16.2304	6.15505	17.1806	10.3553	16.747	0.34318	0.614478	0.55849	0.57651	0.919747
AAGACATCTCAGAAACATCGGCA	F43E2.6	15.4284	15.216	8.20673	18.8168	14.67	14.1028	0.304062	0.571704	0.531852	0.594829	0.921942
TTCTGAGATGTCTTCACAATTC	F43E2.6	15.4284	5.07199	9.23257	15.5443	7.76645	14.1028	0.362121	0.673627	0.53757	0.590874	0.921942
CAGCGTCGTACGATGAAAGATG	F52G3.8	11.2206	10.144	7.18089	16.3625	9.49233	9.69565	0.329097	0.660152	0.498517	0.618119	0.930302
AATCGGAAACTCAAAGACCACA	Y17D7C.3	246.854	271.859	150.799	269.981	202.791	245.036	0.103326	0.207601	0.497717	0.618684	0.930736
TTACGAAGTGGGATTGGAAAATC	F52G3.8	26.649	52.7487	23.5943	40.9062	35.3805	42.3083	0.193093	0.392403	0.492079	0.622664	0.932042
CGGGATGATGGATCGGGATGA	T05E12.10	16.831	26.3743	11.2843	13.09	21.5735	10.5771	-0.272139	0.560541	-0.485495	0.627326	0.933183
AAATCGGAAACTCAAAGACCACA	Y17D7C.3	11.2206	7.10078	7.18089	8.99936	10.3553	12.3399	0.330535	0.687929	0.480478	0.630888	0.933362
AGTGGAGTGGATGACGACGAC	Y57G11C.1145_hairpin, Y57G11C.51	28.0516	11.1584	26.6719	22.0893	30.2029	22.917	0.204293	0.476097	0.4291	0.667851	0.941831
CGGGATGATGGATCGGGATGAA	T05E12.10	12.6232	9.12958	16.4135	7.36311	13.807	10.5771	-0.267783	0.63391	-0.422431	0.672711	0.94349
ATGTATGGAGGACGAACACAAC	C36A4.14	11.2206	7.10078	9.23257	8.18124	8.62939	5.28854	-0.305355	0.734381	-0.415799	0.677557	0.944091
TGTTTGATACCTGGACTCTTTCC	E01G4.7	40.6748	50.7199	23.5943	37.6337	36.2434	29.087	-0.156306	0.386564	-0.404348	0.685957	0.946815
CAACGTCTCGGCTAGCCACCT	T05E12.8	19.6361	33.4751	17.4393	22.9075	26.7511	12.3399	-0.192166	0.493703	-0.389235	0.697103	0.947417
ATGTATGGAGGACGAACACAACC	C36A4.14	49.0903	51.7343	36.9303	67.0861	41.4211	40.5454	0.118881	0.340348	0.349293	0.726869	0.951259
GACGACGAACGATCGGGATGGA	ChrX_intergenic1	18.2336	30.4319	22.5685	17.1806	22.4364	26.4427	-0.12205	0.458992	-0.265909	0.790309	0.96122
ATGTATTAAACGGTAAGGGCC	mir-5592	5.61032	2.02879	16.4135	10.6356	6.04057	11.4585	0.214386	0.807156	0.265607	0.790542	0.961375
CTCCTCGGTCTTGACGAAATCCC	C36A4.14	19.6361	6.08638	14.3618	8.18124	18.9847	16.747	0.151052	0.62278	0.242544	0.808358	0.965523
ATTTGCCGATGTTTCTGAGATG	F43E2.6	40.6748	14.2016	37.9561	43.3605	30.2029	24.6798	0.0967666	0.443531	0.218173	0.827294	0.968411
TGGAAACGTCAAGAAGTTTGATC	F52G3.8	30.8568	29.4175	14.3618	26.18	23.2994	29.087	0.0847896	0.446853	0.189748	0.849506	0.972784
TCTCTCGTAGAACGTGTCGCTTCG	F55A4.9, rncs-1	4.20774	15.216	11.2843	13.09	12.9441	7.9328	0.118513	0.678762	0.174602	0.861392	0.975301
TCTTTCATCGTACGACGCTGTT	F52G3.8	50.4929	64.9214	26.6719	51.5418	34.5176	51.1225	-0.0482853	0.368333	-0.131091	0.895703	0.982758
CCAAGCGGACTGGAGCACATTGG	F55A4.9, rncs-1	26.649	9.12958	6.15505	17.9987	16.3958	8.81423	0.0837699	0.644809	0.129914	0.896634	0.982795
CATGTATTAAACGGTAAGGGC	mir-5592	14.0258	25.3599	33.8528	27.8162	23.2994	25.5613	0.0471403	0.45075	0.104582	0.916708	0.987903
CGGTGTGCTCGAGGGCTTGTCA	Y37E3.30	35.0645	34.4895	14.3618	25.3618	30.2029	25.5613	-0.0383742	0.443042	-0.0866151	0.930977	0.990085
TGTGATTTTGGATTAAACTCA	Y59H11AR.6	15.4284	18.2592	7.18089	17.9987	15.5329	7.9328	0.029251	0.614553	0.0475972	0.962037	0.996064
ATTCTCTCGTAGAACGTGTCGCT	F55A4.9, rncs-1	12.6232	8.11518	12.3101	8.18124	13.807	10.5771	-0.0150259	0.64604	-0.0232585	0.981444	0.998298
TTCTGGAATGAAACGAGTGCTGC	Y116A8B.1	8.41548	14.2016	7.18089	14.7262	3.45176	11.4585	-0.0126647	0.729318	-0.0173652	0.986145	0.999108
AATCGGAAACTCAAAGACCAC	Y17D7C.3	21.0387	10.144	7.18089	10.6356	15.5329	11.4585	0.00226728	0.629103	0.00360398	0.997124	0.99991
AAAAAAGAACTGAAGAGAGTG	C05E7.1, C05E7.t3	0	0	0	0	0	0	NA	NA	NA	NA	NA
AAAAAATATGGATAAGATGATG	F55A4.9, rncs-1	1.40258	0	0	0	0	0	-1.37171	4.08047	-0.336165	0.736746	NA
AAAAATGTAGAAGCTGTGGGCA	E01G4.5	0	0	2.05168	8.18124	0.862939	0.881423	2.20906	1.8389	1.2013	0.229636	NA
AAAAATTCAAATTTAACTCCGTG	Y69A2AR.16_hairpin	0	0	0	0	0	0	NA	NA	NA	NA	NA
AAAACCACGAATCCTAACCACT	tRNA	2.80516	0	6.15505	0	0.862939	0	-3.28833	2.05858	-1.59738	0.110181	NA
AAAAGAACTGAAGAGAGTGGGA	other	0	0	0	0	1.72588	0	1.46127	4.03659	0.362005	0.717348	NA
AAAAGAAGACTGATCTCGGGCG	Y65A5A.26, Y65A5A.t3, Y7A9D.66, Y7A9D.t3	0	0	0	1.63625	3.45176	1.76285	3.45147	2.1835	1.5807	0.113946	NA
AAAAGAGTTGATATATGTGGGC	Y59H11AR.6	0	0	0	0	0	0	NA	NA	NA	NA	NA
AAAAGTTTATGTTGACGGGGAA	TC5	0	1.0144	0	0.818124	0	4.40711	2.09522	2.37288	0.882984	0.377245	NA
AAAATAAAATGTTCTAGCTCTC	E01G4.5	0	0	0	0	0	0	NA	NA	NA	NA	NA
AAAATGGACGACGTGCTCGACAG	C14B1.7	0	1.0144	0	0	0	0	-1.37171	4.08047	-0.336165	0.736746	NA
AAAATTAGCCGCCTACACAACA	T05E12.10	0	0	0	0	0.862939	0	0.551839	4.08047	0.135239	0.892423	NA
AAAATTCAAATTTAACTCCGTG	Y69A2AR.16_hairpin	0	0	0	0	0	0	NA	NA	NA	NA	NA
AAACAACCCTGAACCAGACGT	F31C3.11, rrn-2.1, rrn-2.1_element	0	0	0	0	0	0	NA	NA	NA	NA	NA
AAACAACCCTGAACCAGACGTA	F31C3.11, rrn-2.1, rrn-2.1_element	0	0	0	1.63625	0	0.881423	2.01094	3.43444	0.585523	0.558196	NA
AAACAACCCTGAACCAGACGTAC	F31C3.11, rrn-2.1	0	0	0	0	0	0	NA	NA	NA	NA	NA
AAACATTCGGCAATGGGGTACCC	Y37E3.30	0	0	0	0	0	0	NA	NA	NA	NA	NA
AAACCACGAATCCTAACCACT	tRNA	0	0	0	2.45437	2.58882	7.9328	4.37101	1.81338	2.41042	0.015934	NA
AAACCACGAATCCTAACCACTA	tRNA	8.41548	1.0144	1.02584	4.09062	4.31469	3.52569	0.265188	1.16557	0.227518	0.820021	NA
AAACCACGAATCCTAACCACTAG	tRNA	1.40258	0	0	0	0	0	-1.37171	4.08047	-0.336165	0.736746	NA
AAACCGCCGGAATTTTCAGCC	other	0	1.0144	2.05168	0	0	0	-2.72687	3.18789	-0.855384	0.392339	NA
AAACCGTGCGGCAGTTGCAGAAA	DNA-8-1	0	1.0144	0	0	0	0	-1.37171	4.08047	-0.336165	0.736746	NA
AAACGGAATCGCTGTCCCGGAC	F39E9.7	0	0	0	0	1.72588	0	1.46127	4.03659	0.362005	0.717348	NA
AAACTGGATTGACGAGCATCGAG	F55A4.9, rncs-1	4.20774	11.1584	2.05168	0.818124	0	8.81423	-0.872387	1.22185	-0.71399	0.475233	NA
AAACTGTATTACGGTGGAGTCT	other	0	0	0	0	0	0	NA	NA	NA	NA	NA
AAAGAACAAGCCGTGGGCAAGCA	F39E9.7, F55A4.4	0	0	0	0	0	0	NA	NA	NA	NA	NA
AAAGAATCCATTGTCCAGCTCC	F55A4.9, rncs-1	0	0	0	0.818124	0	0.881423	1.44175	4.03525	0.357289	0.720876	NA
AAAGAATCCATTGTCCAGCTCCA	F55A4.9, rncs-1	0	0	0	0	0	0.881423	0.551839	4.08047	0.135239	0.892423	NA
AAAGGATCACGAGGCTCTTCCTG	Unknown_IR1	0	0	0	0	0	0	NA	NA	NA	NA	NA
AAAGTAAATGCGTTCGGGGGGAA	Y57G11B.t1	0	0	0	0	0	0	NA	NA	NA	NA	NA
AAAGTTGATGGACGGCGAGATT	PALTTAA1	1.40258	0	0	0	0	0	-1.37171	4.08047	-0.336165	0.736746	NA
AAATCACCGTCTAATTTTGAGT	other	2.80516	0	5.12921	0	0	0	-4.07181	2.27138	-1.79266	0.0730272	NA
AAATCGGAAACTCAAAGACCAC	Y17D7C.3	0	0	0	0	0	0	NA	NA	NA	NA	NA
AAATCGGAAACTCAAAGACCACAC	Y17D7C.3	4.20774	0	1.02584	0	0	0.881423	-2.46766	2.39534	-1.03019	0.302919	NA
AAATTCAAATTTAACTCCGTG	Y69A2AR.16_hairpin	0	0	2.05168	0	0	0	-2.14696	4.04968	-0.530155	0.596004	NA
AAATTCAAATTTAACTCCGTGA	Y69A2AR.16_hairpin	0	0	2.05168	0	0	0	-2.14696	4.04968	-0.530155	0.596004	NA
AAATTCAAATTTAACTCCGTGAC	Y69A2AR.16_hairpin	0	0	0	0	0	0	NA	NA	NA	NA	NA
AAATTGTCGGCCGCCGTGAAAAC	other	0	0	3.07752	8.18124	2.58882	5.28854	2.30918	1.43075	1.61396	0.106536	NA
AAATTGTCGGCCGCCGTGGAA	Unknown_hairpin_RE2	0	0	1.02584	0	0	0.881423	-0.409943	3.89816	-0.105163	0.916246	NA
AAATTGTCGGCCGCCGTGGAAA	Unknown_hairpin_RE2	0	0	0	0	0	0	NA	NA	NA	NA	NA
AAATTGTCGGCCGCCGTGGAAAA	other	0	0	0	0	0	0	NA	NA	NA	NA	NA
AAATTGTCGGCCGCCGTGGAAAC	Unknown_hairpin_RE2	1.40258	0	9.23257	4.09062	0	2.64427	-0.672503	1.49127	-0.450961	0.652018	NA
AAATTGTCGGCCGCTGTGGAAAC	ChrV_unknown_hairpin1	1.40258	2.02879	0	1.63625	0.862939	5.28854	1.19142	1.66119	0.717213	0.473243	NA
AACAACCCTGAACCAGACGTA	F31C3.11, rrn-2.1	0	0	0	0	0	0	NA	NA	NA	NA	NA
AACAACCCTGAACCAGACGTAC	F31C3.11, rrn-2.1, rrn-2.1_element	0	1.0144	1.02584	1.63625	0	0	-0.345098	2.83712	-0.121637	0.903187	NA
AACAACGAAGCTCCGAAATAACG	PALTTAA1	0	8.11518	1.02584	0	0	2.64427	-1.83242	1.87135	-0.979199	0.327482	NA
AACCCTGAACCAGACGTACCAA	F31C3.11, rrn-2.1	0	0	0	0	0	0	NA	NA	NA	NA	NA
AACCGGACCCTGCCTCTTCATCA	Y57G11C.1145_hairpin	0	0	0	0	0	2.64427	2.07393	3.69423	0.561396	0.574528	NA
AACGAGACCGCTGAAAAAGTTT	PAL5A	0	0	0	1.63625	0	0	1.39447	4.04264	0.34494	0.730139	NA
AACGTGTCGCTTCGTCATCTGA	F55A4.9, rncs-1	2.80516	5.07199	3.07752	17.9987	7.76645	7.9328	1.60689	0.852603	1.88469	0.0594715	NA
AACTGCCGCACGGTTTCGAAACT	DNA-8-1	0	0	0	0	0	0	NA	NA	NA	NA	NA
AACTGCCGCACGGTTTTGAAACT	DNA-8-1	0	0	0	0	0	0	NA	NA	NA	NA	NA
AACTTAAAACCAACAATGAACA	Y36E3A.2	0	0	2.05168	0	0	1.76285	-0.265848	3.00184	-0.0885617	0.92943	NA
AAGAACAAGCCGTGGGCAAGC	F39E9.7, F55A4.4	1.40258	0	1.02584	1.63625	0	0.881423	0.0982041	2.37937	0.0412732	0.967078	NA
AAGAACAAGCCGTGGGCAAGCA	F39E9.7, F55A4.4	0	4.05759	2.05168	4.09062	4.31469	6.16996	1.18688	1.20788	0.982608	0.3258	NA
AAGAACAAGCCGTGGGCAAGCAC	F39E9.7, F55A4.4	0	0	0	0	0	0	NA	NA	NA	NA	NA
AAGAAGAAGCATCACGTCGTTT	Y17D7C.3	0	0	0	0	0	0	NA	NA	NA	NA	NA
AAGAATCCATTGTCCAGCTCC	F55A4.9, rncs-1	0	0	0	0	0	0	NA	NA	NA	NA	NA
AAGACATCTCAGAAACATCGG	F43E2.6	0	0	3.07752	0	3.45176	1.76285	0.709297	2.05367	0.34538	0.729808	NA
AAGACATCTCAGAAACATCGGCAA	F43E2.6	0	0	0	0	0	0.881423	0.551839	4.08047	0.135239	0.892423	NA
AAGACCCTGTTGAGCTTGACTC	F31C3.9, rrn-3.1	2.80516	0	2.05168	1.63625	0.862939	3.52569	0.349798	1.62274	0.21556	0.82933	NA
AAGAGCCTCGTGATCCTTTGG	Unknown_IR1	0	0	0	0	0	0	NA	NA	NA	NA	NA
AAGAGCCTCGTGATCCTTTGGAG	Unknown_IR1	0	0	0	0	0	0	NA	NA	NA	NA	NA
AAGCACGCCGTCTCTGAGGGAAC	other	0	0	0	0	0	0	NA	NA	NA	NA	NA
AAGCGACACGTTCTACGAGGG	F55A4.9, rncs-1	0	0	0	0	0	0	NA	NA	NA	NA	NA
AAGCGACACGTTCTACGAGGGA	F55A4.9, rncs-1	0	0	0	0	0	0	NA	NA	NA	NA	NA
AAGCGGACTGGAGCACATTGGA	F55A4.9, rncs-1	0	2.02879	0	0	0	0	-2.13597	4.05034	-0.527355	0.597947	NA
AAGGACGGAAAGAAGAGACGC	F55G1.3, his-62	5.61032	0	0	0	0	0	-3.53311	2.7982	-1.26264	0.20672	NA
AAGGATCGATTCATAAATTTTGA	AAGGATCGATTCATAAATTTTGA_Repeat	2.80516	1.0144	0	0	0	0	-2.98884	2.95115	-1.01277	0.311169	NA
AAGGCGCGCTCGAAGAGCCGAGA	ChrIII_hairpin1	0	1.0144	0	4.90874	5.17763	1.76285	3.28269	1.76931	1.85535	0.0635466	NA
AAGTATGATTGATATTGGGAAC	Y59H11AR.6	0	0	0	0.818124	0	0	0.551839	4.08047	0.135239	0.892423	NA
AAGTATGATTGATATTGGGAACA	Y59H11AR.6	1.40258	2.02879	0	2.45437	0.862939	2.64427	0.809887	1.73346	0.467208	0.640351	NA
AAGTGCCACCGTGTCTGGTCTCC	ZK402.3	0	1.0144	3.07752	0	0.862939	1.76285	-0.690909	2.09013	-0.330558	0.740978	NA
AATAAAAACAATGGACAACTG	Y59H11AR.6	0	1.0144	1.02584	0	0	0.881423	-1.19179	3.08483	-0.38634	0.699245	NA
AATACCACGGGCGATGCCAAATC	T05E12.8	0	0	0	0	0	0.881423	0.551839	4.08047	0.135239	0.892423	NA
AATACCTAACGAGACCCAACTTT	PALTA3	0	0	0	0	0	0	NA	NA	NA	NA	NA
AATACGCCCATTTCTGCAACTG	DNA-8-1	0	0	0	0	0	0	NA	NA	NA	NA	NA
AATATTTATTTCGCATCCCTCCC	Y57G11C.36, Y57G11C.51	0	2.02879	0	2.45437	0	3.52569	1.49278	2.11855	0.704624	0.481044	NA
AATATTTATTTCGCATCCCTCCCC	Y57G11C.36, Y57G11C.51	0	0	0	2.45437	3.45176	0	3.24005	2.48472	1.30399	0.192238	NA
AATCTACTTAAATCAACGAAT	mek-2, Y54E10BL.6, Y71F9AL.1	0	0	0	0	0	0	NA	NA	NA	NA	NA
AATGAAACGAGTGCTGCGAAAAC	Y116A8B.1	7.0129	9.12958	3.07752	5.72686	6.90351	7.9328	0.100073	0.832316	0.120234	0.904298	NA
AATGACTACTGTAGCGCTTGTG	CELE1	0	0	0	0	0	0	NA	NA	NA	NA	NA
AATTCCAAAACTGCTGTTTCCCC	Y59H11AR.6	0	2.02879	0	0	0	0	-2.13597	4.05034	-0.527355	0.597947	NA
AATTCCACTTGGGGTAAATTCG	C36A4.14	0	0	0	0	0.862939	0	0.551839	4.08047	0.135239	0.892423	NA
AATTCTCGTTCTCTCCACACAC	R119.7, rnp-8	0	0	0	0	0	0	NA	NA	NA	NA	NA
AATTCTCTCGTAGAACGTGTCG	F55A4.9, rncs-1	0	0	0	0.818124	0.862939	0	1.42815	4.03956	0.353542	0.723682	NA
AATTCTCTCGTAGAACGTGTCGC	F55A4.9, rncs-1	2.80516	8.11518	5.12921	1.63625	12.0811	2.64427	0.00406277	1.00494	0.00404279	0.996774	NA
AATTGTCGGCCGCCGTGGAAAA	other	0	0	1.02584	0	0	0	-1.37171	4.08047	-0.336165	0.736746	NA
AATTGTCGGCCGCCGTGGAAAAC	other	1.40258	0	0	0.818124	0.862939	0	0.468713	3.0261	0.15489	0.876908	NA
AATTGTCGGCCGCTGTGGAAACC	ChrV_unknown_hairpin1	0	0	0	0.818124	0	0	0.551839	4.08047	0.135239	0.892423	NA
AATTGTGAAGACATCTCAGAA	F43E2.6	1.40258	2.02879	3.07752	9.81748	4.31469	2.64427	1.34684	1.14445	1.17684	0.239258	NA
AATTGTGAAGACATCTCAGAAA	F43E2.6	4.20774	0	0	2.45437	7.76645	1.76285	1.65087	1.53422	1.07603	0.281914	NA
AATTTTGCCTTTTCCCCGTGAGT	PALTA3	0	0	0	0	0	0	NA	NA	NA	NA	NA
ACAACCCTGAACCAGACGTACC	F31C3.11, rrn-2.1, rrn-2.1_element	0	0	0	0	0	0	NA	NA	NA	NA	NA
ACAACCCTGAACCAGACGTACCA	F31C3.11, rrn-2.1	0	0	0	0	0	0	NA	NA	NA	NA	NA
ACATCTCAGAAACATCGGCAA	F43E2.6	0	1.0144	2.05168	1.63625	7.76645	5.28854	2.17727	1.42279	1.53028	0.125948	NA
ACATCTCAGAAACATCGGCAAA	F43E2.6	8.41548	1.0144	4.10336	9.81748	4.31469	11.4585	0.971985	0.91459	1.06275	0.287893	NA
ACATTTTCGGCCAGTGGGGCACA	other	1.40258	0	0	0	0	0	-1.37171	4.08047	-0.336165	0.736746	NA
ACCAATTGTACTTTGTAGGAGCC	Y116A8B.1	2.80516	4.05759	5.12921	9.81748	12.0811	10.5771	1.41521	0.812281	1.74227	0.0814614	NA
ACCACTGAACCACCGATGCGA	other	0	0	0	0	0	0	NA	NA	NA	NA	NA
ACCACTTCCGCAGACGCTACA	Y37E3.30	1.40258	0	0	6.54499	0.862939	0.881423	2.77173	1.98929	1.39333	0.163521	NA
ACCACTTCCGCAGACGCTACAA	Y37E3.30	0	0	0	0	0	0	NA	NA	NA	NA	NA
ACCACTTCCGCAGACGCTACAAC	Y37E3.30	0	0	0	0	0	0	NA	NA	NA	NA	NA
ACCATCCGGATGCTTCATGTTTC	E01G4.7	0	0	0	1.63625	0	0	1.39447	4.04264	0.34494	0.730139	NA
ACCGAGCTCACAATGATATTGC	F52G3.8	0	0	0	0.818124	0	0	0.551839	4.08047	0.135239	0.892423	NA
ACCGGACCCTGCCTCTTCATC	Y57G11C.1145_hairpin	0	0	0	0.818124	0	3.52569	2.79175	2.80704	0.994556	0.319952	NA
ACCGGGTTAGTATTTTCAAGCA	ZK1236.8	0	0	0	0	0	0	NA	NA	NA	NA	NA
ACCGGTACAGAGAGTGTGGATA	lin-29, other, W03C9.4	0	0	0	1.63625	2.58882	0	2.7566	2.80375	0.983185	0.325516	NA
ACCTACGTACAACACCGGGCTC	T05E12.8	0	0	0	0	6.04057	3.52569	3.9309	2.13728	1.83921	0.0658839	NA
ACCTCCATGTCGTAGGAATGCT	C40A11.10, mir-8199	0	0	0	0	0	0	NA	NA	NA	NA	NA
ACCTGAACTTTTTGGATCAACA	T05E12.10	1.40258	1.0144	1.02584	4.09062	4.31469	6.16996	2.10035	1.34013	1.56727	0.11705	NA
ACGACGACGATGGCTGCGGCGAG	Y57G11C.1145_hairpin	0	0	0	0	1.72588	0	1.46127	4.03659	0.362005	0.717348	NA
ACGACGATGGCTGCGGCGAGG	Y57G11C.1145_hairpin	0	0	0	1.63625	1.72588	0	2.42798	3.05469	0.794838	0.426707	NA
ACGACGATGGCTGCGGCGAGGA	Y57G11C.1145_hairpin	0	0	0	0	0.862939	1.76285	2.06408	3.3816	0.610385	0.541607	NA
ACGACGATGGCTGCGGCGAGGAT	Y57G11C.1145_hairpin	0	2.02879	3.07752	1.63625	0.862939	0	-1.05702	1.97503	-0.535193	0.592517	NA
ACGATGGATTCTTTGGAGCAAC	F55A4.9, rncs-1	0	0	0	1.63625	0	5.28854	3.46528	2.37758	1.45748	0.144983	NA
ACGATGGATTCTTTGGAGCAACC	F55A4.9, rncs-1	7.0129	10.144	1.02584	4.09062	5.17763	6.16996	-0.232055	0.951021	-0.244007	0.807226	NA
ACGATGGCTGCGGCGAGGATGA	Y57G11C.1145_hairpin	0	0	0	0	0	1.76285	1.48791	4.03425	0.368819	0.712263	NA
ACGATGGCTGCGGCGAGGATGAT	Y57G11C.1145_hairpin	0	0	0	0	0.862939	0.881423	1.47455	3.99406	0.369186	0.711989	NA
ACGATTTTGAACGTATAGACCCA	Y29A2AR.16	0	0	0	0	0	0	NA	NA	NA	NA	NA
ACGGAGTTAAATTTGAATTTTT	Y69A2AR.16_hairpin	8.41548	8.11518	2.05168	0	0	0	-5.29256	1.67084	-3.16761	0.00153696	NA
ACGGAGTTAAATTTGAATTTTTT	Y69A2AR.16_hairpin	0	1.0144	1.02584	0	0	0	-2.14412	3.75906	-0.570386	0.568416	NA
ACGGCAACTCGGTCCAAAACCA	PALNN1	0	0	0	0	0	0	NA	NA	NA	NA	NA
ACGTGTCGCTTCGTCATCTGA	F55A4.9, rncs-1	4.20774	3.04319	0	9.81748	6.04057	12.3399	2.01716	1.01266	1.99194	0.0463773	NA
ACGTGTTCCAGCATTCTTCGA	Y37E3.30	0	0	0	0	0	0	NA	NA	NA	NA	NA
ACTATCTACACTCTCTGTACCGG	Unknown_RE2	0	0	0	0	0	0	NA	NA	NA	NA	NA
ACTCCACCGTAATACAGTTTTCC	other	0	0	0	0	0	0	NA	NA	NA	NA	NA
ACTGCCGCACGGTTTCGAAACT	DNA-8-1	0	0	0	4.90874	0	1.76285	3.41764	2.40209	1.42278	0.154801	NA
ACTGCCGCACGGTTTTGAAAC	DNA-8-1	0	0	0	0	0	0	NA	NA	NA	NA	NA
ACTGCCGCACGGTTTTGAAACTG	DNA-8-1	4.20774	0	0	0	0	0	-3.11632	3.10009	-1.00524	0.314783	NA
ACTGCTCTACTGAATACAACACC	F31C3.10, F31C3.9, rrn-3.1, rrn-3.56	0	0	0	0	0	0	NA	NA	NA	NA	NA
ACTTCTTCCACGCCATCATCC	Y57G11C.1145_hairpin	0	0	0	0	0	0	NA	NA	NA	NA	NA
ACTTCTTCCACGCCATCATCCAC	Y57G11C.1145_hairpin	0	0	0	0	0	0.881423	0.551839	4.08047	0.135239	0.892423	NA
ACTTCTTCCACGCCATCATCCACA	Y57G11C.1145_hairpin	0	5.07199	2.05168	6.54499	6.90351	8.81423	1.57142	1.05377	1.49124	0.135899	NA
ACTTGATTTCTCTGAAAATAGCA	ZK430.7	0	2.02879	4.10336	2.45437	0	0	-1.33238	2.01951	-0.659752	0.509413	NA
ACTTTTTCAGCGGTCTCGTTATA	PAL5A	0	0	0	0	0	0	NA	NA	NA	NA	NA
ACTTTTTCAGCGGTCTCGTTATG	PAL5A	0	0	0	0	0	0	NA	NA	NA	NA	NA
AGAAACTTGGACTTTTTCGCTGG	F55A4.9, rncs-1	1.40258	0	2.05168	0	2.58882	1.76285	0.339749	1.96723	0.172705	0.862884	NA
AGAACGTGTCGCTTCGTCATCTG	F55A4.9, rncs-1	2.80516	4.05759	1.02584	2.45437	0.862939	0	-1.23263	1.62348	-0.759248	0.447704	NA
AGAAGACCATTAGACAGCACCC	K06C4.23, other	0	0	0	0	0	0	NA	NA	NA	NA	NA
AGACATCTCAGAAACATCGGC	F43E2.6	2.80516	2.02879	10.2584	6.54499	7.76645	8.81423	0.591895	0.890715	0.664516	0.50636	NA
AGACATCTCAGAAACATCGGCA	F43E2.6	2.80516	1.0144	4.10336	2.45437	8.62939	15.8656	1.76779	1.02715	1.72106	0.0852392	NA
AGACATCTCAGAAACATCGGCAA	F43E2.6	0	5.07199	1.02584	2.45437	2.58882	0	-0.309762	1.70311	-0.18188	0.855677	NA
AGACATCTCAGAAACATCGGCAAA	F43E2.6	0	1.0144	0	0	0	2.64427	1.10967	3.0444	0.364495	0.715488	NA
AGACCACTTCCGCAGACGCTACA	Y37E3.30	0	0	0	0	0	0	NA	NA	NA	NA	NA
AGAGCTTATGCCCTATGTATGG	F31C3.10, F31C3.9, rrn-3.1, rrn-3.56	0	0	0	0	0.862939	0	0.551839	4.08047	0.135239	0.892423	NA
AGAGGTCCAAGTAAGATGATA	F39E9.7	4.20774	0	1.02584	0.818124	3.45176	0.881423	0.0466424	1.69853	0.0274605	0.978092	NA
AGAGGTCCAAGTAAGATGATAG	F39E9.7	0	0	0	7.36311	0	0	3.56159	2.56115	1.39062	0.164339	NA
AGAGGTCCAAGTAAGATGATAGC	F39E9.7	2.80516	2.02879	0	2.45437	1.72588	0.881423	0.109403	1.67257	0.0654098	0.947848	NA
AGAGTGACAGACATCCGGGAC	Unknown_RE2	0	0	0	0	0	0	NA	NA	NA	NA	NA
AGAGTGACAGACATCCGGGACC	Unknown_RE2	0	0	0	0	0	0	NA	NA	NA	NA	NA
AGAGTGACAGACATCCGGGACCC	Unknown_RE2	0	0	0	0	0	0	NA	NA	NA	NA	NA
AGAGTGACAGACATCCGGGACCT	Unknown_RE2	0	0	0	0	0	0	NA	NA	NA	NA	NA
AGAGTGTAGTCAGCTGAAGAGAC	rft-2, Y47D7A.14_IR, Y47D7A.14_IR_element	0	0	1.02584	0	0	0	-1.37171	4.08047	-0.336165	0.736746	NA
AGCAAGAGGAAGAGAAACAAAAG	F19B2.5	0	0	0	0	0	0	NA	NA	NA	NA	NA
AGCACTAATAGAGAATATACGGT	Unknown_RE6	0	0	0	0	0	0	NA	NA	NA	NA	NA
AGCAGACGCTCATGACCACTT	Y17D7B.4	0	0	0	0	0	0	NA	NA	NA	NA	NA
AGCATCGAGAAACTTGGACTTTT	F55A4.9, rncs-1	0	0	0	0.818124	0	0	0.551839	4.08047	0.135239	0.892423	NA
AGCCAATATCGGACGATGAAGC	other	0	3.04319	0	0	1.72588	0	-0.856342	2.74905	-0.311505	0.755417	NA
AGCCAATATCGGACGATGAAGCC	other	0	0	0	0.818124	4.31469	2.64427	3.63271	2.12438	1.71001	0.0872636	NA
AGCCGGCCCTTACCGTTTAATAC	mir-5592	0	0	0	0	0	0	NA	NA	NA	NA	NA
AGCCGTGGTCGATGCTGAAAG	F55A4.9, rncs-1	0	0	3.07752	0	0	0	-2.72754	3.47628	-0.784614	0.43268	NA
AGCCGTGGTCGATGCTGAAAGG	F55A4.9, rncs-1	2.80516	3.04319	3.07752	4.09062	0	0.881423	-0.833097	1.4627	-0.569561	0.568975	NA
AGCCGTGGTCGATGCTGAAAGGT	F55A4.9, rncs-1	1.40258	1.0144	0	2.45437	1.72588	0	0.840946	2.13542	0.393808	0.693723	NA
AGCCTCGTGATCCTTTGGAGCTG	Unknown_IR1	0	0	0	0	0	0	NA	NA	NA	NA	NA
AGCGAAAACTACAGTAAGAACT	PALTA4	1.40258	2.02879	0	0	2.58882	1.76285	0.346694	1.96899	0.176077	0.860234	NA
AGCGAAAACTACAGTAATTCTT	CELE1	0	0	0	0	0	0	NA	NA	NA	NA	NA
AGCGAAAACTACAGTAATTCTTT	CELE1	0	0	0	0	0	0.881423	0.551839	4.08047	0.135239	0.892423	NA
AGCGACACGTTCTACGAGGGA	F55A4.9, rncs-1	0	0	0	0	0	0	NA	NA	NA	NA	NA
AGCGACACGTTCTACGAGGGAAT	F55A4.9, rncs-1	0	0	2.05168	1.63625	0	0	-0.348031	3.03903	-0.114521	0.908825	NA
AGCGGTCTCGTTATGAAAATCAG	PAL5A	0	0	0	0	0	0	NA	NA	NA	NA	NA
AGCTAGCTTCACAACAATTGACC	W03D2.15	0	0	0	0.818124	0	0	0.551839	4.08047	0.135239	0.892423	NA
AGGATCAGAACATCAGGAAGAGC	Unknown_IR1	0	0	0	0	0	0	NA	NA	NA	NA	NA
AGGCACAGTTCTGTGGGCGGGG	24F12A.4, H15N14.4, H37A05.4, Y24F12A.3	0	0	1.02584	0	0	0	-1.37171	4.08047	-0.336165	0.736746	NA
AGGCACAGTTCTGTGGGCGGGGC	H15N14.4, H37A05.4, Y24F12A.3, Y24F12A.4	0	0	0	0	4.31469	0	2.78366	3.06598	0.907919	0.363921	NA
AGGCACATTTTAAGTCGGTAGGC	gmps-1, M106.4	0	0	0	0	0	0	NA	NA	NA	NA	NA
AGGTACAGAACTGTGGGCGGGGC	Y24F12A.3, Y24F12A.4	1.40258	0	0	1.63625	0	0	0.437106	3.27072	0.133642	0.893685	NA
AGTCGGGTTGCTTGAAAGTGC	F31C3.9, rrn-3.1	0	0	0	0	0	0	NA	NA	NA	NA	NA
AGTGACAGACATCCGGGACCT	Unknown_RE2	0	0	0	0	0	0	NA	NA	NA	NA	NA
AGTGAGGCTCAGGATTTTGAGTG	M4.2, puf-4	0	0	0	0	0	0	NA	NA	NA	NA	NA
AGTGGAGTGGATGACGACGACGAT	Y57G11C.1145_hairpin	5.61032	20.2879	7.18089	4.09062	0	2.64427	-2.30196	0.994282	-2.3152	0.0206021	NA
AGTGGATGACGACGACGATGGC	Y57G11C.1145_hairpin	0	0	0	4.90874	2.58882	0.881423	3.74619	2.07736	1.80334	0.0713352	NA
AGTGGATGACGACGACGATGGCT	Y57G11C.1145_hairpin	9.81807	8.11518	2.05168	0	0.862939	1.76285	-2.93496	1.33875	-2.19231	0.0283572	NA
AGTGGGCCGAGCGATTCGCTGA	Y116A8C.27	0	0	0	0	0	0	NA	NA	NA	NA	NA
AGTGGGCCGAGCGATTCGCTGAT	Y116A8C.27	1.40258	0	0	0	0	0	-1.37171	4.08047	-0.336165	0.736746	NA
AGTGGTTCGTGGCTTCCAAATCC	T05E12.8	0	1.0144	0	5.72686	0	2.64427	2.78319	2.07354	1.34224	0.179518	NA
AGTTCAACAGGTAGATCAAAAA	TIR54TA1	0	0	0	0	0	0	NA	NA	NA	NA	NA
AGTTCAAGTCTCTCGATGCTCG	F55A4.9, rncs-1	0	0	0	0	0	0	NA	NA	NA	NA	NA
AGTTGGTTGATGCTTGTCCGG	F31C3.9, rrn-3.1	0	4.05759	0	0	1.72588	0.881423	-0.682445	2.24613	-0.303831	0.761257	NA
ATAAATCGACGTTTCTTTCACAA	hcp-1, ZK1055.1	0	0	0	0	0	0	NA	NA	NA	NA	NA
ATAACGAGACCGCTGAAAAAGT	PAL5A	0	3.04319	0	0	0	0	-2.71331	3.49115	-0.777196	0.437043	NA
ATAACGAGACCGCTGAAAAAGTT	PAL5A	0	0	0	0	0	1.76285	1.48791	4.03425	0.368819	0.712263	NA
ATACAATGAAAACAACACTTTTG	F23B2.9	0	0	0	0	0	0	NA	NA	NA	NA	NA
ATACGGCTAGCCATATAAAGACC	C36A4.14	0	2.02879	0	1.63625	0.862939	0	0.257878	2.60294	0.0990716	0.921081	NA
ATAGAGCGAGAATTAACAAGA	DNA-8-1	0	0	0	0	0	0	NA	NA	NA	NA	NA
ATAGAGCGAGAATTAACAAGAA	DNA-8-1	0	0	0	0	0	0	NA	NA	NA	NA	NA
ATAGCGGCGCGCGGAACCCATG	PALTA3	0	0	0	0	0	0	NA	NA	NA	NA	NA
ATATAGTGACTCTGGCCGTTCA	ATATAGTGACTCTGGCCGTTCA_repeat	0	0	0	0	0	0	NA	NA	NA	NA	NA
ATATTTGGAACAGAAGCAAGA	F19B2.5	0	0	0	0	0	0	NA	NA	NA	NA	NA
ATATTTGGAACAGAAGCAAGAG	F19B2.5	5.61032	0	7.18089	3.27249	0	0	-1.93643	1.6357	-1.18386	0.23647	NA
ATATTTGGAACAGAAGCAAGAGG	F19B2.5	0	0	4.10336	0	1.72588	0	-1.28171	2.55952	-0.500762	0.616539	NA
ATCACATAACTCCGCCCCCTGA	other	0	0	0	0	0	0	NA	NA	NA	NA	NA
ATCATCCTCGCCGCAGCCATCGT	Y57G11C.1145_hairpin	0	0	0	0	0	0	NA	NA	NA	NA	NA
ATCCACGACGGCCGACAATTTCC	Unknown_hairpin_RE2	0	0	0	0	0	0	NA	NA	NA	NA	NA
ATCCCAGAACTGGAAATCTTCAC	other	0	0	0	1.63625	0	1.76285	2.44171	3.04299	0.802404	0.42232	NA
ATCCCCCCTCCTGTGGAAGTAGA	C36A4.14	2.80516	1.0144	4.10336	1.63625	6.04057	1.76285	0.255177	1.27459	0.200203	0.841322	NA
ATCCTCGCCGCAGCCATCGTCG	Y57G11C.1145_hairpin	0	0	1.02584	0	0	0	-1.37171	4.08047	-0.336165	0.736746	NA
ATCCTCGCCGCAGCCATCGTCGT	Y57G11C.1145_hairpin	0	0	0	0.818124	0	0	0.551839	4.08047	0.135239	0.892423	NA
ATCCTTGTACCAGTTATCTGCA	K02E2.11	0	0	0	0	0	0	NA	NA	NA	NA	NA
ATCCTTGTACCAGTTATCTGCAA	K02E2.11	0	0	0	0	0	0	NA	NA	NA	NA	NA
ATCGACACAAGCGCTACAGTAG	CELE1	0	0	0	0	0	0	NA	NA	NA	NA	NA
ATCGACACAAGCGCTACAGTAGC	CELE1	0	0	0	0	0	0	NA	NA	NA	NA	NA
ATCGACACAAGCGCTACAGTAGT	CELE1	0	0	0	0	1.72588	0	1.46127	4.03659	0.362005	0.717348	NA
ATCGGTGTGCTCGAGGGCTTGT	Y37E3.30	8.41548	9.12958	0	4.90874	3.45176	3.52569	-0.544164	1.07004	-0.508543	0.611072	NA
ATCGTCGTCGTCATCCACTCC	Y57G11C.1145_hairpin	4.20774	1.0144	1.02584	0	0	0	-3.70044	2.32057	-1.59462	0.110797	NA
ATCGTCGTCGTCATCCACTCCAC	Y57G11C.1145_hairpin	2.80516	2.02879	5.12921	0	0	0.881423	-3.44514	1.86645	-1.84583	0.0649172	NA
ATCGTCGTCGTCATCCACTCCACC	Y57G11C.1145_hairpin	0	0	1.02584	2.45437	0	0	1.01926	3.09616	0.329201	0.742004	NA
ATCGTCGTCGTCATCCACTCCACT	Y57G11C.1145_hairpin	0	0	0	0	0	0	NA	NA	NA	NA	NA
ATCTACATGTGATCTACGCGAAT	pcp-4, Unknown_RE8, Y116F11B.3, Y15E3A.3, Y6B3B.7, Y6B3B.9	1.40258	1.0144	0	0	0.862939	0	-1.37008	2.96557	-0.461996	0.644084	NA
ATCTACCTGTTGAACTTGACTCC	TIR54TA1	0	0	0	0	0	0	NA	NA	NA	NA	NA
ATCTACCTGTTGAACTTGACTCT	F08B1.2, gcy-12	0	0	0	0	0	0	NA	NA	NA	NA	NA
ATCTCAGAAACATCGGCAAAT	F43E2.6	0	3.04319	6.15505	1.63625	3.45176	1.76285	-0.468187	1.352	-0.346292	0.729123	NA
ATCTCAGAAACATCGGCAAATGG	F43E2.6	8.41548	3.04319	3.07752	7.36311	6.90351	1.76285	0.182755	0.986796	0.1852	0.853072	NA
ATCTCTGATCTTTTCCAATTCTT	F55A4.9, rncs-1	0	0	0	0.818124	0	0	0.551839	4.08047	0.135239	0.892423	NA
ATGAACCACAAGCGAAATCGCCC	Y37E3.30	0	1.0144	3.07752	0	0	0.881423	-2.18756	2.53726	-0.862174	0.388592	NA
ATGAAGAGGCAGGGTCCGGTTG	Y57G11C.1145_hairpin	4.20774	5.07199	5.12921	10.6356	13.807	7.9328	1.1599	0.783497	1.48041	0.138764	NA
ATGAAGAGGCAGGGTCCGGTTGCG	Y57G11C.1145_hairpin	1.40258	3.04319	5.12921	9.81748	3.45176	0.881423	0.542673	1.15714	0.468978	0.639086	NA
ATGACGACGACGATGGCTGCGG	Y57G11C.1145_hairpin	0	4.05759	0	1.63625	0.862939	3.52569	0.515237	1.78036	0.2894	0.772275	NA
ATGATGGCGTGGAAGAAGTTG	Y57G11C.1145_hairpin	0	0	6.15505	7.36311	7.76645	1.76285	1.40477	1.30985	1.07247	0.283509	NA
ATGATGGCGTGGAAGAAGTTGAT	Y57G11C.1145_hairpin	2.80516	0	5.12921	4.09062	0.862939	7.05138	0.600749	1.29811	0.462787	0.643517	NA
ATGATGTGGATGATGGCGTGGA	Y57G11C.1145_hairpin	0	1.0144	1.02584	1.63625	2.58882	0.881423	1.25367	1.97367	0.635194	0.525302	NA
ATGATGTGGATGATGGCGTGGAA	Y57G11C.1145_hairpin	4.20774	3.04319	2.05168	3.27249	5.17763	1.76285	0.155371	1.16649	0.133195	0.894039	NA
ATGATTTATTGTTCCCGTAAT	PALTA4	0	0	0	0	0	0	NA	NA	NA	NA	NA
ATGCGGTTGTTCCAAAGAATCC	F55A4.9, rncs-1	0	0	0	0.818124	0.862939	0.881423	2.03321	3.1508	0.645298	0.518734	NA
ATGCTCGTCGATCCAGTTTGGCC	F55A4.9, rncs-1	2.80516	5.07199	0	2.45437	1.72588	0	-0.903938	1.6502	-0.547776	0.583846	NA
ATGGATAGCTCAGTGGATAGT	irld-17, Y46H3D.4	0	0	0	0	0	0	NA	NA	NA	NA	NA
ATGGCAGCCGATGTGAATGAAGA	T05E12.8	1.40258	3.04319	0	1.63625	0	0	-1.42345	2.35004	-0.605712	0.544706	NA
ATGGCTGCGGCGAGGATGATG	Y57G11C.1145_hairpin	0	0	0	1.63625	0	0	1.39447	4.04264	0.34494	0.730139	NA
ATGGCTGCGGCGAGGATGATGT	Y57G11C.1145_hairpin	4.20774	1.0144	0	6.54499	4.31469	7.05138	1.893	1.22986	1.5392	0.123755	NA
ATGTATTAAACGGTAAGGGCCG	mir-5592	0	0	11.2843	0	1.72588	4.40711	-0.911916	1.62348	-0.561705	0.574317	NA
ATGTATTAAACGGTAAGGGCCGG	mir-5592	5.61032	6.08638	3.07752	0	0	0.881423	-4.00499	1.68702	-2.37401	0.0175962	NA
ATGTATTAAACGGTAAGGGCCGGC	mir-5592	0	0	0	0	0	0	NA	NA	NA	NA	NA
ATGTGGATGATGGCGTGGAAGA	Y57G11C.1145_hairpin	1.40258	0	1.02584	2.45437	2.58882	0	1.10781	2.04752	0.54105	0.588473	NA
ATGTGGATGATGGCGTGGAAGAA	Y57G11C.1145_hairpin	4.20774	0	0	0	4.31469	0	0.107738	2.23201	0.0482696	0.961501	NA
ATGTTTCTGAGATGTCTTCAC	F43E2.6	0	0	2.05168	0	0	0	-2.14696	4.04968	-0.530155	0.596004	NA
ATGTTTCTGAGATGTCTTCACA	F43E2.6	0	0	0	0	0	0	NA	NA	NA	NA	NA
ATGTTTCTGAGATGTCTTCACAA	F43E2.6	0	0	0	0	0	0	NA	NA	NA	NA	NA
ATTAAACGGTAAGGGCCGGCT	mir-5592	0	2.02879	2.05168	0	0	0	-3.13928	2.84214	-1.10455	0.269355	NA
ATTAGATACCGTACCCCGAAAAC	ChrIII_hairpin2	0	0	0	0	0	0	NA	NA	NA	NA	NA
ATTAGATACCGTACCCCGAAAACT	ChrIII_hairpin2	0	0	0	0	0	2.64427	2.07393	3.69423	0.561396	0.574528	NA
ATTCCACTTGGGGTAAATTCGCC	C36A4.14	0	1.0144	0	0	0	1.76285	0.523516	3.37754	0.154999	0.876822	NA
ATTCGGGAATTAGTTGTCGACAC	T05E12.8	2.80516	2.02879	0	0.818124	1.72588	0.881423	-0.463745	1.81773	-0.255123	0.798628	NA
ATTCTCTCGTAGAACGTGTCGC	F55A4.9, rncs-1	1.40258	1.0144	0	0	1.72588	2.64427	0.892034	2.12075	0.420621	0.674032	NA
ATTCTCTCGTAGAACGTGTCGCTT	F55A4.9, rncs-1	4.20774	17.2448	12.3101	4.09062	2.58882	3.52569	-1.7461	0.85267	-2.0478	0.0405797	NA
ATTGAGACCAGTGATAGCGACC	F19G12.2, F58F9.1	0	0	0	0.818124	0	0	0.551839	4.08047	0.135239	0.892423	NA
ATTGCCAGTCGAGTCAGAAAATC	Y116F11A.1	0	0	0	0	0	0.881423	0.551839	4.08047	0.135239	0.892423	NA
ATTGGCCTACCGAACGAAAAACC	Y116F11A.1	0	1.0144	0	1.63625	0.862939	0	1.04213	2.85462	0.365068	0.715061	NA
ATTGGGTCAGGGAAGTACTTCG	W05H12.4	1.40258	0	0	0.818124	2.58882	0	1.48315	2.56775	0.577608	0.563529	NA
ATTGTCGGCCGCCGTGGAAAAC	other	0	0	0	0	0.862939	0	0.551839	4.08047	0.135239	0.892423	NA
ATTGTGAAGACATCTCAGAAA	F43E2.6	14.0258	1.0144	4.10336	3.27249	8.62939	7.05138	0.0353186	0.94997	0.0371786	0.970343	NA
ATTTAAAGCCGATAGGTAACC	PALTTAA3	0	0	0	0	0	0	NA	NA	NA	NA	NA
ATTTGCCGATGTTTCTGAGAT	F43E2.6	0	0	7.18089	4.09062	6.04057	0	0.462914	1.57834	0.293292	0.769299	NA
ATTTTGGGGGGCAGAAATCGGAA	PAL8C	0	0	0	0	0	0	NA	NA	NA	NA	NA
CAAAAATCGCCCGAAAATTCAC	pde-2, R08D7.6	0	0	0	0	0	0	NA	NA	NA	NA	NA
CAAAACTGCTGTTTCCCCTGTG	Y59H11AR.6	0	0	0	0	2.58882	0	2.0466	3.7245	0.549497	0.582665	NA
CAAAATACCAGATTGTCCTTCA	F39E9.29_region	0	3.04319	1.02584	0	0.862939	0	-2.18091	2.54364	-0.857397	0.391225	NA
CAAAATTGGCGGAGCGATCGTTC	other	0	0	0	0	0	0	NA	NA	NA	NA	NA
CAAAATTTCCGCCCCATGCTTAC	Y37E3.30	0	0	0	0	0	0	NA	NA	NA	NA	NA
CAAACTGGATTGACGAGCATCG	F55A4.9, rncs-1	2.80516	4.05759	0	4.90874	6.90351	18.5099	2.15542	1.04331	2.06595	0.0388336	NA
CAAACTGGATTGACGAGCATCGAG	F55A4.9, rncs-1	9.81807	3.04319	7.18089	5.72686	0	0.881423	-1.56931	1.16796	-1.34363	0.179068	NA
CAAATCGTCTCTTCCGCGCGCC	Unknown_RE2	0	0	0	0	0	0	NA	NA	NA	NA	NA
CAACCCTGAACCAGACGTACCA	F31C3.11, rrn-2.1	0	0	0	0	0	0	NA	NA	NA	NA	NA
CAACCGGACCCTGCCTCTTCATC	Y57G11C.1145_hairpin	0	0	1.02584	0	0.862939	0	-0.409943	3.91265	-0.104774	0.916555	NA
CAACGTCTCGGCTAGCCACCTA	T05E12.8	2.80516	2.02879	6.15505	1.63625	5.17763	2.64427	-0.229942	1.15799	-0.19857	0.842599	NA
CAAGAGGAAGAGAAACAAAAGG	F19B2.5	0	1.0144	0	0	0	0	-1.37171	4.08047	-0.336165	0.736746	NA
CAAGAGGAAGAGAAACAAAAGGA	F19B2.5	0	1.0144	0	0	0	0	-1.37171	4.08047	-0.336165	0.736746	NA
CAAGTTCAACAGGTAGATCAAA	TIR54TA1	0	0	0	0	0	0	NA	NA	NA	NA	NA
CAAGTTCAACAGGTAGATCAAAA	TIR54TA1	0	0	0	1.63625	0	0	1.39447	4.04264	0.34494	0.730139	NA
CAATAAAAACAATGGACAACTGC	Y59H11AR.6	0	8.11518	3.07752	3.27249	3.45176	9.69565	0.500341	1.10061	0.454604	0.649394	NA
CAATCAAAGGATAGTCTCAACA	F31C3.10, F31C3.9, rrn-3.1, rrn-3.56	0	0	0	0	0	0	NA	NA	NA	NA	NA
CAATGAAAACAACACTTTTGGT	F23B2.9	0	0	0	0	0	0	NA	NA	NA	NA	NA
CAATGGAGCGGTGTAAACTTTT	E01G4.7	1.40258	0	2.05168	7.36311	6.04057	4.40711	2.39071	1.31088	1.82374	0.068191	NA
CAATGTATGGAGGACGAACACA	C36A4.14	0	0	0	0	0	0	NA	NA	NA	NA	NA
CAATGTGCTCCAGTCCGCTTGGC	F55A4.9, rncs-1	0	0	0	0	0	0	NA	NA	NA	NA	NA
CACATCATCCTCGCCGCAGCCAT	Y57G11C.1145_hairpin	0	0	0	0	0	0	NA	NA	NA	NA	NA
CACCGTCCTGCTGTCAATATCA	F31C3.9, rrn-3.1	0	0	0	0	0	0	NA	NA	NA	NA	NA
CACGCCATCATCCACATCATCCT	Y57G11C.1145_hairpin	0	0	0	0	0	0	NA	NA	NA	NA	NA
CACGGAGTTAAATTTGAATTTT	Y69A2AR.16_hairpin	0	1.0144	0	0	0	0	-1.37171	4.08047	-0.336165	0.736746	NA
CACGGAGTTAAATTTGAATTTTT	Y69A2AR.16_hairpin	2.80516	8.11518	3.07752	0	0	0	-4.90418	1.78482	-2.74772	0.00600118	NA
CACGGCAACTCGGTCCAAAACC	PALNN1	0	0	0	1.63625	0.862939	0	2.00173	3.44384	0.581251	0.561071	NA
CACGGTGCCAGATCCTGAAAACG	other	0	0	0	0	0	0	NA	NA	NA	NA	NA
CACTTACCAGCACACAGAGACGC	Y57G11C.51	2.80516	3.04319	0	0.818124	0	8.81423	0.733204	1.59332	0.460174	0.645391	NA
CAGACATGATCTGGAGATGTTT	Y116A8B.1	1.40258	3.04319	0	2.45437	0.862939	1.76285	0.190575	1.70799	0.111579	0.911157	NA
CAGCACGACGTAGACGGAAAGGA	H15N14.4	0	0	0	0	0	0	NA	NA	NA	NA	NA
CAGCCATCGTCGTCGTCATCCAC	Y57G11C.1145_hairpin	0	0	0	0	0	0	NA	NA	NA	NA	NA
CAGCCGGCCCTTACCGTTTAAT	mir-5592	0	0	0	0	1.72588	0	1.46127	4.03659	0.362005	0.717348	NA
CAGCCGGCCCTTACCGTTTAATA	mir-5592	5.61032	0	2.05168	0.818124	0	0	-3.02727	2.15098	-1.40739	0.159312	NA
CAGCGAATCGCTCTGCCCACTT	Y116A8C.27	0	0	0	0	0	0	NA	NA	NA	NA	NA
CAGCGAATCGCTCTGCCCACTTT	Y116A8C.27	0	0	0	0	0	0	NA	NA	NA	NA	NA
CAGCGTGAACTGTCGAGAGTGC	linc-68, Y49F6A.10	0	1.0144	3.07752	3.27249	5.17763	5.28854	1.67346	1.33516	1.25338	0.210068	NA
CAGTGGAGTGGATGACGACGACG	Y57G11C.1145_hairpin	2.80516	1.0144	4.10336	0.818124	0.862939	1.76285	-1.20358	1.54159	-0.780734	0.434959	NA
CAGTGGAGTGGATGACGACGACGA	Y57G11C.1145_hairpin	0	4.05759	3.07752	0	0	0	-3.94461	2.32409	-1.69727	0.0896458	NA
CATAACGAGACCGCTGAAAAAGT	PAL5A	0	0	0	0	0	0	NA	NA	NA	NA	NA
CATAGGAAATAGATCTAGAACTT	F58A6.9	0	0	0	0	0	0	NA	NA	NA	NA	NA
CATATCCCATGAATTGTCCGCA	linc-17, Y49F6A.9	0	2.02879	0	2.45437	5.17763	0	1.8415	2.00478	0.918555	0.358329	NA
CATCAGCACCAACACCTCACCC	C36A4.14	0	1.0144	0	0	0	0	-1.37171	4.08047	-0.336165	0.736746	NA
CATCATCCTCGCCGCAGCCAT	Y57G11C.1145_hairpin	0	1.0144	0	0	0	0	-1.37171	4.08047	-0.336165	0.736746	NA
CATCATCCTCGCCGCAGCCATC	Y57G11C.1145_hairpin	0	0	0	0	0	0	NA	NA	NA	NA	NA
CATCATCCTCGCCGCAGCCATCG	Y57G11C.1145_hairpin	0	4.05759	0	0.818124	0	3.52569	0.0513599	2.06038	0.0249274	0.980113	NA
CATCATCCTCGCCGCAGCCATCGT	Y57G11C.1145_hairpin	0	0	0	0	0	0	NA	NA	NA	NA	NA
CATCCCGATCGTTCGTCGTCGC	ChrX_intergenic1	0	0	1.02584	1.63625	0	0	0.435937	3.43044	0.127079	0.898878	NA
CATCGTAAGGCACCCGACACACT	Y41C4A.17	0	0	0	0	0	0	NA	NA	NA	NA	NA
CATCGTCCGATTGGTGAAACCA	Y17D7C.3	0	1.0144	0	0	0	0	-1.37171	4.08047	-0.336165	0.736746	NA
CATCGTCGTCGTCATCCACTCC	Y57G11C.1145_hairpin	5.61032	1.0144	6.15505	0	1.72588	1.76285	-1.87495	1.42716	-1.31376	0.188927	NA
CATCGTCGTCGTCATCCACTCCA	Y57G11C.1145_hairpin	0	1.0144	1.02584	0	0	0.881423	-1.19179	3.08483	-0.38634	0.699245	NA
CATCTCAGAAACATCGGCAAA	F43E2.6	9.81807	4.05759	3.07752	5.72686	8.62939	5.28854	0.252434	0.879557	0.287002	0.774111	NA
CATCTCAGAAACATCGGCAAATGG	F43E2.6	2.80516	1.0144	0	2.45437	1.72588	2.64427	0.917174	1.64102	0.558905	0.576227	NA
CATGACGGTTTGATCTACAAA	CELE14B	0	0	0	0	0	0	NA	NA	NA	NA	NA
CATGAGATGTCGGCGGCCTGAT	PALTA3	0	0	0	0	0	0	NA	NA	NA	NA	NA
CATGAGATGTCGGCGGCCTGATA	PALTA3	4.20774	3.04319	3.07752	0.818124	0	0	-3.4853	1.83781	-1.89644	0.0579022	NA
CATGGCCGTTCTTAGTTGGTGGA	F31C3.7, F31C3.8, rrn-1.1, rrn-1.2	0	0	0	0	0	0	NA	NA	NA	NA	NA
CATGTATTAAACGGTAAGGGCCGG	mir-5592	0	0	6.15505	1.63625	0	0	-1.91402	2.33136	-0.820987	0.411654	NA
CATTCCTACGACATGGAGGTCCC	C40A11.10, mir-8199	0	0	1.02584	0	0	0	-1.37171	4.08047	-0.336165	0.736746	NA
CATTCCTACGACATGGAGGTCCCT	C40A11.10, mir-8199	0	0	0	0	0	0	NA	NA	NA	NA	NA
CATTTCTACAAGTCTCATGTTGA	M01E5.3	0	0	0	0	0	0	NA	NA	NA	NA	NA
CATTTGCCGATGTTTCTGAGA	F43E2.6	0	0	0	0	0	0	NA	NA	NA	NA	NA
CATTTTTGGTAAGCAGAACTGGC	F31C3.9, rrn-3.1	4.20774	6.08638	4.10336	5.72686	6.04057	11.4585	0.679288	0.860988	0.788964	0.430133	NA
CCAAACTGGATTGACGAGCAT	F55A4.9, rncs-1	0	0	0	1.63625	0	1.76285	2.44171	3.04299	0.802404	0.42232	NA
CCAAACTGGATTGACGAGCATC	F55A4.9, rncs-1	12.6232	5.07199	5.12921	4.09062	7.76645	9.69565	-0.0540283	0.809302	-0.0667591	0.946773	NA
CCAAAGGATCACGAGGCTCTTC	Unknown_IR1	0	0	0	0	0	0	NA	NA	NA	NA	NA
CCAAAGGATCACGAGGCTCTTCC	Unknown_IR1	0	0	0	0	0	0	NA	NA	NA	NA	NA
CCAAGCGGACTGGAGCACATTGGA	F55A4.9, rncs-1	0	0	0	0	0	0	NA	NA	NA	NA	NA
CCACCGTGTCTGGTCTCCTCGC	ZK402.3	0	1.0144	0	0	0	0	-1.37171	4.08047	-0.336165	0.736746	NA
CCACCGTGTCTGGTCTCCTCGCC	ZK402.3	0	0	0	0	0	0	NA	NA	NA	NA	NA
CCACGCCATCATCCACATCATCC	Y57G11C.1145_hairpin	0	0	0	0	2.58882	0	2.0466	3.7245	0.549497	0.582665	NA
CCACGGCGGCCGACAATTTCCG	Unknown_hairpin_RE2	0	0	0	0.818124	0	0	0.551839	4.08047	0.135239	0.892423	NA
CCACGGCGGCCGACAATTTCCGA	Unknown_hairpin_RE2	0	0	0	0	0	0	NA	NA	NA	NA	NA
CCAGATCCGGAAAACGTAGATCC	other	0	0	0	0	0	0	NA	NA	NA	NA	NA
CCATCAGCACCAACACCTCACC	C36A4.14	0	1.0144	0	0	0.862939	0	-0.409943	3.92172	-0.104531	0.916748	NA
CCATCAGCACCAACACCTCACCC	C36A4.14	0	0	0	0	2.58882	0	2.0466	3.7245	0.549497	0.582665	NA
CCATCGGACGAGCTCTTATCCCC	T05E12.8	0	1.0144	0	0.818124	1.72588	2.64427	2.08592	2.19817	0.948934	0.342654	NA
CCATCGGACGAGCTCTTATCCCCT	T05E12.8	0	0	0	0	0	0	NA	NA	NA	NA	NA
CCATCGTCGTCGTCATCCACTCC	Y57G11C.1145_hairpin	1.40258	2.02879	0	0	0	0	-2.85958	3.06276	-0.93366	0.350479	NA
CCATTTGCCGATGTTTCTGAGA	F43E2.6	1.40258	1.0144	0	0	0	0	-2.34001	3.52391	-0.664037	0.506666	NA
CCCCATTGCCGAATGTTTGAAT	Y37E3.30	1.40258	0	0	0.818124	2.58882	0	1.48315	2.56775	0.577608	0.563529	NA
CCCCGAACGCAGATTTATTTTT	T04D3.t1	0	0	0	0	0	0	NA	NA	NA	NA	NA
CCCCGTGAGGACCGTGTACGCCC	Y116A8B.1	5.61032	0	3.07752	1.63625	1.72588	0.881423	-0.992353	1.52748	-0.649668	0.515907	NA
CCCGCATTTTTTGTAGATCAGA	CELE14B	0	0	0	0	0	0	NA	NA	NA	NA	NA
CCCGCCCACAGAACTGTGCCTTG	H15N14.4, H37A05.4, Y24F12A.3, Y24F12A.4	0	0	0	0	0	0	NA	NA	NA	NA	NA
CCCGCCCACAGTTCTGTACCTTG	Y24F12A.3, Y24F12A.4	0	0	0	0	0	0	NA	NA	NA	NA	NA
CCCGCCCACGATTTCATTTGC	mir-5550_RE	0	0	0	0	0	0	NA	NA	NA	NA	NA
CCCGCGGGTGATGACAGAAAC	dnj-27_element	0	0	0	0	0	0	NA	NA	NA	NA	NA
CCCGCGGGTGATGACAGAAACGG	dnj-27_element	0	0	0	4.09062	0	0	2.71417	3.1233	0.869007	0.384843	NA
CCCGTCTAGGTGATCTTTCAACA	Y37E3.30	0	0	0	0	1.72588	0	1.46127	4.03659	0.362005	0.717348	NA
CCCTACTCTTCGCATCTCATC	Y67D8A.2	0	0	0	0	0	0	NA	NA	NA	NA	NA
CCCTTACCGTTTAATACATGTT	mir-5592	0	0	0	0	2.58882	0	2.0466	3.7245	0.549497	0.582665	NA
CCCTTACGATCCTTCTTATCTGA	Unknown_IR1	0	0	0	0	0	0	NA	NA	NA	NA	NA
CCCTTCTACTTGGACGGAACA	Y17D7C.3	1.40258	2.02879	1.02584	0.818124	3.45176	6.16996	1.21754	1.41568	0.860038	0.389768	NA
CCCTTTGTACACACCGCCCGTC	F31C3.7, F31C3.8, rrn-1.1, rrn-1.2	0	0	0	0	0	0	NA	NA	NA	NA	NA
CCCTTTGTACACACCGCCCGTCG	F31C3.7, F31C3.8, rrn-1.1, rrn-1.2	0	0	0	0	0	0	NA	NA	NA	NA	NA
CCGATGTTTCTGAGATGTCTT	F43E2.6	0	0	0	0	1.72588	0	1.46127	4.03659	0.362005	0.717348	NA
CCGATGTTTCTGAGATGTCTTC	F43E2.6	1.40258	6.08638	8.20673	8.18124	6.04057	5.28854	0.278244	0.900856	0.308866	0.757423	NA
CCGATGTTTCTGAGATGTCTTCA	F43E2.6	1.40258	1.0144	0	13.9081	6.04057	9.69565	3.70135	1.31782	2.8087	0.00497423	NA
CCGATTATTCTGGAACAAGTAT	MTCE.7	0	0	0	0	0	0	NA	NA	NA	NA	NA
CCGATTTCTGCCCCCCCAAAAT	PAL8C	0	0	0	0	0	0	NA	NA	NA	NA	NA
CCGATTTCTGCCCCCCCAAAATG	PAL8C	1.40258	2.02879	1.02584	0	0.862939	0	-2.2826	2.33796	-0.976323	0.328904	NA
CCGATTTCTGCCCCCCCAAAATGT	PAL8C	0	0	0	0	0	0	NA	NA	NA	NA	NA
CCGCATTTTTTGTAGATCAAACC	CELE14B	0	0	0	0.818124	2.58882	0	2.44475	3.06107	0.798658	0.424489	NA
CCGCATTTTTTGTAGATCAAAGC	CELE14B	0	0	0	0	0	0	NA	NA	NA	NA	NA
CCGCCCACAGAACTGTACCTTGC	H15N14.4, H37A05.4	1.40258	0	0	0	0	0	-1.37171	4.08047	-0.336165	0.736746	NA
CCGCCCACAGTTCTGTACCTTG	Y24F12A.3, Y24F12A.4	0	0	0	0.818124	0	0	0.551839	4.08047	0.135239	0.892423	NA
CCGCCCACAGTTCTGTACCTTGC	Y24F12A.3, Y24F12A.4	0	0	0	0	0	0	NA	NA	NA	NA	NA
CCGCGCGCCGCTATGTTTAACT	PALTA3	1.40258	4.05759	4.10336	3.27249	12.9441	7.9328	1.29671	0.97202	1.33403	0.182193	NA
CCGCGCGCCGCTATGTTTAACTC	PALTA3	0	0	0	0	0	0	NA	NA	NA	NA	NA
CCGCGCGCCGCTATGTTTAACTT	PALTA3	0	0	0	0	0.862939	0	0.551839	4.08047	0.135239	0.892423	NA
CCGGATGTCTGTCACTCTCTAAC	Unknown_RE2	0	0	0	1.63625	0	0	1.39447	4.04264	0.34494	0.730139	NA
CCGGCCCTTACCGTTTAATAC	mir-5592	2.80516	9.12958	2.05168	4.09062	2.58882	1.76285	-0.741276	1.12989	-0.656057	0.511787	NA
CCGGTCGATGCAATTCTTTTT	other	0	0	0	0	0	0	NA	NA	NA	NA	NA
CCGTCTAGGTGATCTTTCAACA	Y37E3.30	2.80516	2.02879	1.02584	5.72686	7.76645	3.52569	1.57231	1.1522	1.36461	0.172376	NA
CCGTCTAGGTGATCTTTCAACAC	Y37E3.30	2.80516	5.07199	0	4.90874	0.862939	2.64427	0.101672	1.38554	0.0733809	0.941503	NA
CCGTGAGTGGACGAGAAAAAGG	PALTA3	0	0	0	0	0	0	NA	NA	NA	NA	NA
CCGTGATGGGACAGCCTGACACC	CELE14B	14.0258	1.0144	0	0	0	0	-4.99005	3.92711	-1.27067	0.203847	NA
CCTCAATGTGTGCCTGCTTCT	Y37E11B.2	0	0	0	0	0	0	NA	NA	NA	NA	NA
CCTCATACCGCGTATCTATTC	F47E1.18, linc-22	0	0	0	0	0	0	NA	NA	NA	NA	NA
CCTCATACCGCGTATCTATTCA	F47E1.18, linc-22	0	0	0	0	0	0	NA	NA	NA	NA	NA
CCTCCCGATAGAATGAATTTTC	Y57G11C.1144	0	0	0	1.63625	0	0	1.39447	4.04264	0.34494	0.730139	NA
CCTCGAGAGCGCGACAAAAACT	W03D2.15	0	0	0	0	2.58882	0	2.0466	3.7245	0.549497	0.582665	NA
CCTTACGATCCTTCTTATCTGA	Unknown_IR1	0	0	0	0	0	0	NA	NA	NA	NA	NA
CCTTCGACATCTCTGATAACAA	F58A4.3, hcp-3	0	0	0	0	0	0	NA	NA	NA	NA	NA
CCTTGATTCTCAAAGTGCAGACC	W03D2.15	0	0	0	0.818124	0	0	0.551839	4.08047	0.135239	0.892423	NA
CGAAGAGCCGAGAAGAGAGATCA	ChrIII_hairpin1	0	0	0	0	0	0	NA	NA	NA	NA	NA
CGACACGTTCTACGAGGGAATT	F55A4.9, rncs-1	0	0	0	0	1.72588	1.76285	2.47475	3.01548	0.820682	0.411827	NA
CGACCGGACGCCGATTTGTACAG	Unknown_hairpin_RE2	0	0	0	0	0	0	NA	NA	NA	NA	NA
CGACGACGAACGATCGGGATG	ChrX_intergenic1	1.40258	1.0144	2.05168	4.09062	6.04057	4.40711	1.6976	1.25664	1.35091	0.176725	NA
CGACGACGAACGATCGGGATGGA	ChrX_intergenic1	1.40258	1.0144	0	0	2.58882	0	0.129546	2.534	0.0511232	0.959227	NA
CGACGACGATGGCTGCGGCGAG	Y57G11C.1145_hairpin	0	0	0	0	0	0	NA	NA	NA	NA	NA
CGACGACGATGGCTGCGGCGAGG	Y57G11C.1145_hairpin	0	0	1.02584	8.18124	7.76645	0	3.71214	1.7872	2.07707	0.0377952	NA
CGACGACGATGGCTGCGGCGAGGA	Y57G11C.1145_hairpin	0	1.0144	0	0	2.58882	0	1.08399	3.06009	0.354236	0.723162	NA
CGACGATGGCTGCGGCGAGGATG	Y57G11C.1145_hairpin	2.80516	8.11518	2.05168	4.90874	13.807	7.9328	1.01421	0.897887	1.12955	0.258666	NA
CGACGATGGCTGCGGCGAGGATGA	Y57G11C.1145_hairpin	0	5.07199	0	0	0.862939	2.64427	-0.577372	2.04801	-0.281919	0.778006	NA
CGACGGATCAGTGTTGCCACT	T05E12.8	1.40258	8.11518	0	6.54499	7.76645	0.881423	0.650215	1.24306	0.523077	0.600921	NA
CGACGTGTTCCAGCATTCTTCGAC	Y37E3.30	0	0	0	0	0	0	NA	NA	NA	NA	NA
CGAGGATGATGTGGATGATGG	Y57G11C.1145_hairpin	0	0	0	0	0	0	NA	NA	NA	NA	NA
CGAGGATGATGTGGATGATGGCG	Y57G11C.1145_hairpin	0	0	1.02584	0.818124	0	0	-0.409943	3.94869	-0.103817	0.917314	NA
CGATGCTCGTCGATCCAGTTT	F55A4.9, rncs-1	0	1.0144	0	2.45437	0	0.881423	1.45775	2.64991	0.550112	0.582242	NA
CGATGCTCGTCGATCCAGTTTGG	F55A4.9, rncs-1	5.61032	2.02879	0	0.818124	0.862939	0	-2.13425	1.94787	-1.09568	0.273217	NA
CGATGCTCGTCGATCCAGTTTGGC	F55A4.9, rncs-1	0	0	0	0	0	0	NA	NA	NA	NA	NA
CGATGGATTCTTTGGAGCAAC	F55A4.9, rncs-1	0	1.0144	0	0	0.862939	0	-0.409943	3.92172	-0.104531	0.916748	NA
CGATGGATTCTTTGGAGCAACCG	F55A4.9, rncs-1	1.40258	1.0144	0	3.27249	2.58882	0	1.33212	1.98422	0.671355	0.501994	NA
CGATGGCTGCGGCGAGGATGA	Y57G11C.1145_hairpin	0	0	0	0.818124	0	0	0.551839	4.08047	0.135239	0.892423	NA
CGATGGCTGCGGCGAGGATGATGT	Y57G11C.1145_hairpin	2.80516	1.0144	1.02584	2.45437	7.76645	3.52569	1.55934	1.29207	1.20685	0.227488	NA
CGATGTTTCTGAGATGTCTTC	F43E2.6	0	0	2.05168	0	0	3.52569	0.729511	2.61004	0.279502	0.77986	NA
CGATGTTTCTGAGATGTCTTCA	F43E2.6	0	0	1.02584	0	0	0	-1.37171	4.08047	-0.336165	0.736746	NA
CGATGTTTCTGAGATGTCTTCAC	F43E2.6	0	0	0	0.818124	0	0	0.551839	4.08047	0.135239	0.892423	NA
CGATGTTTCTGAGATGTCTTCACA	F43E2.6	0	0	1.02584	0	0	0	-1.37171	4.08047	-0.336165	0.736746	NA
CGCATTTTTCGTAGATCAAACCG	CELE14B	0	0	0	0	0	0	NA	NA	NA	NA	NA
CGCATTTTTTGTAGATCAAACC	CELE14B	0	0	0	0	0.862939	0	0.551839	4.08047	0.135239	0.892423	NA
CGCATTTTTTGTAGATCAAACCC	CELE14B	0	0	0	0	0	0	NA	NA	NA	NA	NA
CGCATTTTTTGTAGATCAAACCG	CELE14B	0	1.0144	0	0	0.862939	0	-0.409943	3.92172	-0.104531	0.916748	NA
CGCATTTTTTGTAGATCAACGT	CELE14B	0	0	0	0	0	0	NA	NA	NA	NA	NA
CGCCAAACATGGATCAACTGGA	ZK402.2, ZK402.3, ZK402.5	0	2.02879	0	4.09062	0	0	0.969641	2.52847	0.38349	0.701357	NA
CGCCACGAGCGGTGGAGCCTGCA	T05E12.8	0	0	0	1.63625	0	0	1.39447	4.04264	0.34494	0.730139	NA
CGCGCCGCTATGTTTAACTCGC	PALTA3	0	2.02879	0	0	2.58882	1.76285	1.03608	2.28997	0.452441	0.650951	NA
CGCGCCGCTATGTTTAACTCGCA	PALTA3	0	0	0	0	0	0	NA	NA	NA	NA	NA
CGCGCGCCGCTATGTTTAACTC	PALTA3	0	0	1.02584	4.09062	7.76645	6.16996	3.88487	1.59693	2.43272	0.0149861	NA
CGCGCGCCGCTATGTTTAACTCG	PALTA3	0	0	1.02584	0	0.862939	0	-0.409943	3.91265	-0.104774	0.916555	NA
CGCGCGCCGCTATGTTTAACTT	PALTA3	2.80516	1.0144	0	2.45437	4.31469	0	0.897274	1.77496	0.505518	0.613195	NA
CGCGCGGTTTGGTCCAGTCTCC	E01G4.5	0	0	1.02584	2.45437	0	0	1.01926	3.09616	0.329201	0.742004	NA
CGCGGGTGATGACAGAAACGGG	dnj-27_element	0	0	1.02584	0	0	0	-1.37171	4.08047	-0.336165	0.736746	NA
CGCGTAGGTCTAAATTATTTTG	other	0	0	0	0	0	0	NA	NA	NA	NA	NA
CGGAAACTGAAGCCCCAAAATC	other	0	1.0144	0	0	0	0	-1.37171	4.08047	-0.336165	0.736746	NA
CGGAAATTCGTTGATTGAGACA	other	0	0	0	0	0	0	NA	NA	NA	NA	NA
CGGAATGGTTCAAAAATCGAGCC	F52G3.8	1.40258	2.02879	0	1.63625	0	0	-1.04149	2.50686	-0.415458	0.677807	NA
CGGACGGGAGCCAAGTTTGCACC	other	0	0	0	0	0	0	NA	NA	NA	NA	NA
CGGACTGGAGCACATTGGAAAAA	F55A4.9, rncs-1	0	0	0	0	0	0	NA	NA	NA	NA	NA
CGGAGAAATGACGAGAAATGC	K07C5.13	0	2.02879	3.07752	0.818124	0	2.64427	-0.606268	1.87961	-0.322549	0.747036	NA
CGGAGCTCGGTTGTGTACGACC	F49B2.3, Y116A8B.1	1.40258	8.11518	0	5.72686	1.72588	2.64427	0.0640459	1.31125	0.0488433	0.961044	NA
CGGAGCTGAAGGATCAGAACATC	Unknown_IR1	0	0	0	0	0	0	NA	NA	NA	NA	NA
CGGAGTTAAATTTGAATTTTTT	Y69A2AR.16_hairpin	0	0	0	0	0	0	NA	NA	NA	NA	NA
CGGAGTTAAATTTGAATTTTTTA	Y69A2AR.16_hairpin	0	0	0	0	0	0	NA	NA	NA	NA	NA
CGGATAGTGTGATCTTAGAACCC	Y116F11A.1	0	5.07199	2.05168	5.72686	2.58882	6.16996	0.963843	1.19682	0.805334	0.420627	NA
CGGATGTCTGTCACTCTCTAAC	Unknown_RE2	0	0	0	0	0	0	NA	NA	NA	NA	NA
CGGCCCTTACCGTTTAATACATGT	mir-5592	2.80516	0	3.07752	0.818124	0	0	-2.66679	2.29521	-1.1619	0.245277	NA
CGGCGAGGATGATGTGGATGATG	Y57G11C.1145_hairpin	0	0	0	0	0	0	NA	NA	NA	NA	NA
CGGCGCGCGGAACCCATGAGATG	PALTA3	0	0	0	0	0	2.64427	2.07393	3.69423	0.561396	0.574528	NA
CGGCGGCCGACAATTTCCGAGC	Unknown_hairpin_RE2	0	0	0	0	0	0	NA	NA	NA	NA	NA
CGGCGGCCGACAATTTCCGAGT	Unknown_hairpin_RE2	0	0	0	0	0	0	NA	NA	NA	NA	NA
CGGCGGCCGACGATTTCTGAGTT	F23D12.11	0	0	0	0	0	0	NA	NA	NA	NA	NA
CGGCTCTTCGAGCGCGTCTTCTT	ChrIII_hairpin1	2.80516	0	1.02584	3.27249	1.72588	0	0.455715	1.88753	0.241435	0.809218	NA
CGGGAGGAAAGCTGGGATTATCC	Y37E3.30	5.61032	1.0144	7.18089	0	7.76645	3.52569	-0.286426	1.20031	-0.238627	0.811395	NA
CGTACACAACCGAGCTCCGCC	F49B2.3, Y116A8B.1	0	0	1.02584	0.818124	0.862939	1.76285	1.49557	2.45891	0.608224	0.543039	NA
CGTAGGATGTCGGCGGCCTGATA	PALTA3	0	0	0	0	0	0	NA	NA	NA	NA	NA
CGTATATTCTCTATTAGTGCTGC	Unknown_RE6	0	0	0	0	0	0	NA	NA	NA	NA	NA
CGTATATTCTCTATTAGTGCTGT	other, ZK792.4	0	0	0	0	0	0	NA	NA	NA	NA	NA
CGTATTGCAAGCCACGGTTCTGT	DNA-8-1	0	0	0	0	0	0	NA	NA	NA	NA	NA
CGTCCTGCTGTCAATATCAACCA	F31C3.9, rrn-3.1	0	0	0	0	0	0	NA	NA	NA	NA	NA
CGTCGCGGCCGAGCTTCCCAAA	Y71H2B.5	0	0	0	0	0	0	NA	NA	NA	NA	NA
CGTCGTCATCCACTCCACCGA	Y57G11C.1145_hairpin	1.40258	1.0144	3.07752	3.27249	3.45176	0.881423	0.460048	1.43418	0.320773	0.748383	NA
CGTCGTCGTCATCCACTCCACC	Y57G11C.1145_hairpin	11.2206	17.2448	9.23257	0.818124	4.31469	1.76285	-2.46196	0.89372	-2.75473	0.00587406	NA
CGTCGTCGTCATCCACTCCACCG	Y57G11C.1145_hairpin	0	0	0	0	0	0	NA	NA	NA	NA	NA
CGTCGTCGTCATCCACTCCACT	Y57G11C.1145_hairpin	2.80516	0	1.02584	1.63625	0	0	-1.16282	2.45	-0.474619	0.635058	NA
CGTGAGATGTCGGCGGCCTGATA	PALTA3	0	0	0	0	0.862939	0	0.551839	4.08047	0.135239	0.892423	NA
CGTGGAAGAAGTTGATGAAGAGG	Y57G11C.1145_hairpin	0	0	0	0	0	0	NA	NA	NA	NA	NA
CGTGGCGTGTACTGCAGAAAACC	PALTA3	0	0	0	0	0	0	NA	NA	NA	NA	NA
CGTGTCGCATCTGTCCGAAGTTG	other, tbc-9, Y45F10A.6	0	0	0	0	0	0	NA	NA	NA	NA	NA
CGTGTCGCTTCGTCATCTGATG	F55A4.9, rncs-1	8.41548	7.10078	1.02584	4.90874	5.17763	0.881423	-0.568025	1.07882	-0.526526	0.598523	NA
CGTTCTACGAGGGAATTGACT	F55A4.9, rncs-1	7.0129	1.0144	0	0	0	0	-4.05378	2.3116	-1.75367	0.0794875	NA
CTAAATACTGGAGCAGCGCAACC	F52G3.8	1.40258	16.2304	4.10336	1.63625	0	0.881423	-3.11834	1.37028	-2.2757	0.0228642	NA
CTAAGACTGTTTCTGATCACAA	F43E2.13, F43E2.6, linc-169	5.61032	0	2.05168	8.99936	3.45176	2.64427	1.05645	1.21969	0.866157	0.386404	NA
CTAATAACCGGTATACCGAATT	E01G4.7	0	0	0	0.818124	0	0	0.551839	4.08047	0.135239	0.892423	NA
CTACAACGTGGAGCTAAGACACCC	F55C9.3	0	0	0	0	0.862939	0	0.551839	4.08047	0.135239	0.892423	NA
CTAGTCAATTCTCTCGTAGAACG	F55A4.9, rncs-1	5.61032	0	0	0.818124	0	1.76285	-1.05631	2.11841	-0.498633	0.618038	NA
CTATCAATACTCTATGTTTTTT	C35D6.3	0	0	0	0	0.862939	0	0.551839	4.08047	0.135239	0.892423	NA
CTATCTACACTCTCTGTACCGA	other	0	0	0	0	0	0	NA	NA	NA	NA	NA
CTATCTACACTCTCTGTACCGG	Unknown_RE2	0	0	0	0	0	0.881423	0.551839	4.08047	0.135239	0.892423	NA
CTATCTACACTCTCTGTACCGT	other	0	0	0	0	0	0	NA	NA	NA	NA	NA
CTATTTTGATAAGTCACTGACAC	F39E9.29_region	0	0	0	2.45437	0	3.52569	3.25578	2.47572	1.31508	0.188482	NA
CTCAAAATAATAAAACTGCGT	PALTA3	0	0	0	0	0	0	NA	NA	NA	NA	NA
CTCAAAATAATAAAACTGCGTGG	PALTA3	0	0	0	0	0	2.64427	2.07393	3.69423	0.561396	0.574528	NA
CTCAAAATCCTGAGCCTCACTCA	M4.2, puf-4	0	0	0	0	0	0	NA	NA	NA	NA	NA
CTCAACAGATCGCAGTATAAAA	F31C3.10, F31C3.9, rrn-3.1, rrn-3.56	0	0	0	0	0	0	NA	NA	NA	NA	NA
CTCAGGATTTTGAGTGAGGCTCA	M4.2, puf-4	0	0	0	0	0	0	NA	NA	NA	NA	NA
CTCATCTCTGATCTTTTCCAATT	F55A4.9, rncs-1	2.80516	2.02879	0	1.63625	1.72588	0	-0.486027	1.90967	-0.254509	0.799102	NA
CTCCAGGTCCATCTACAAACAAC	K02E2.11	0	0	0	0	0	0	NA	NA	NA	NA	NA
CTCCAGTCCGCTTGGCCAAACT	F55A4.9, rncs-1	0	0	0	0	0	0	NA	NA	NA	NA	NA
CTCCATACGGTCATTTGAGTCTC	F34D6.11, linc-12	8.41548	3.04319	9.23257	4.09062	0	7.05138	-0.886743	1.0452	-0.848398	0.396216	NA
CTCCTCGGTCTTGACGAAATCCCA	C36A4.14	0	0	0	0.818124	0	0.881423	1.44175	4.03525	0.357289	0.720876	NA
CTCGAACTCGCGACCTCTAGATC	irld-17, Y46H3D.4	0	0	0	0	0	0	NA	NA	NA	NA	NA
CTCGAATCAGTTCAGTCCCGGAT	F31C3.7, F31C3.8, rrn-1.1, rrn-1.2	0	0	0	0	0	0	NA	NA	NA	NA	NA
CTCGACTTTCCAGTTCTACCAT	T05E12.10	0	0	0	0	0	0	NA	NA	NA	NA	NA
CTCGCCGCAGCCATCGTCGTCG	Y57G11C.1145_hairpin	0	1.0144	0	0	1.72588	7.05138	2.84264	2.07479	1.37009	0.17066	NA
CTCGCCGCAGCCATCGTCGTCGT	Y57G11C.1145_hairpin	0	2.02879	0	0	0	0	-2.13597	4.05034	-0.527355	0.597947	NA
CTCGGAAATTGTCGGCCGCTGTG	ChrV_unknown_hairpin1, other	0	0	0	0	0	0	NA	NA	NA	NA	NA
CTCGGCATTCAGAGGCAACTTCC	Unknown_RE3	0	0	0	0	0	0.881423	0.551839	4.08047	0.135239	0.892423	NA
CTCGGCATTCAGAGGCAACTTCT	npr-34, Y54E2A.1	0	0	0	0	0	0	NA	NA	NA	NA	NA
CTCGTAGAACGTGTCGCTTCGTC	F55A4.9, rncs-1	0	1.0144	1.02584	0	0	1.76285	-0.266587	2.80427	-0.0950648	0.924263	NA
CTCGTCGATCCAGTTTGGCCA	F55A4.9, rncs-1	0	0	0	0.818124	0	0	0.551839	4.08047	0.135239	0.892423	NA
CTCGTCGATCCAGTTTGGCCAA	F55A4.9, rncs-1	0	0	0	0	0	0	NA	NA	NA	NA	NA
CTCTCGATGCTCGTCGATCCAGT	F55A4.9, rncs-1	0	0	0	0	0.862939	0	0.551839	4.08047	0.135239	0.892423	NA
CTCTCTCTTTCAGCTCAATGCC	F55A4.9, rncs-1	0	0	0	0.818124	0	0.881423	1.44175	4.03525	0.357289	0.720876	NA
CTCTTACTGTAGTTTTCGCTA	PALTA4	4.20774	0	1.02584	0.818124	0	0	-2.46799	2.40273	-1.02716	0.304345	NA
CTCTTCAGCTGACTACACTCTCT	rft-2, Y47D7A.14_IR, Y47D7A.14_IR_element	0	0	0	0	0	0	NA	NA	NA	NA	NA
CTCTTCGAGCGCGTCTTCTTGC	ChrIII_hairpin1	0	0	1.02584	0.818124	0	0.881423	0.480455	3.1535	0.152356	0.878906	NA
CTCTTCGAGCGCGTCTTCTTTA	ChrIII_hairpin1	0	0	0	0	0	0	NA	NA	NA	NA	NA
CTCTTGCTTCTGTTCCAAATA	F19B2.5	0	0	0	0	0	0	NA	NA	NA	NA	NA
CTCTTGCTTCTGTTCCAAATATG	F19B2.5	0	0	0	0	0	0	NA	NA	NA	NA	NA
CTGAGGATTTTGAGTGAGGCTCA	M4.2, puf-4	0	0	0	3.27249	0	0	2.39242	3.39485	0.70472	0.480984	NA
CTGAGGATTTTGAGTGAGGCTGA	M4.2, puf-4	0	0	0	0	0	0	NA	NA	NA	NA	NA
CTGATCTCTCTTCTCGGCTCTT	ChrIII_hairpin1	0	3.04319	0	0	0	0	-2.71331	3.49115	-0.777196	0.437043	NA
CTGCCTGCCCAGAGCTAAGTACC	T25G12.8	0	0	0	0	0	0	NA	NA	NA	NA	NA
CTGCGGCGAGGATGATGTGGATG	Y57G11C.1145_hairpin	0	0	0	4.90874	0	1.76285	3.41764	2.40209	1.42278	0.154801	NA
CTGTCAATCTATTTTTCGTCTGT	CTGTCAATCTATTTTTCGTCTGT_Repeat	0	0	0	0	0	0	NA	NA	NA	NA	NA
CTGTTCTGCTCTCTCTTTCAGC	F55A4.9, rncs-1	14.0258	5.07199	2.05168	11.4537	4.31469	0.881423	-0.301382	0.994631	-0.303009	0.761883	NA
CTGTTCTGCTCTCTCTTTCAGCT	F55A4.9, rncs-1	0	0	0	0	0	0	NA	NA	NA	NA	NA
CTGTTCTGCTCTCTCTTTCAGCTC	F55A4.9, rncs-1	0	4.05759	0	1.63625	0.862939	0	-0.727152	2.25716	-0.322153	0.747337	NA
CTTCAAGTTCTATTGCCGGATAT	F39E9.10	0	0	0	0.818124	0	0	0.551839	4.08047	0.135239	0.892423	NA
CTTCATCTAAGGCTAAATATCGA	F31C3.9, rrn-3.1	0	2.02879	0	6.54499	1.72588	0	1.96177	1.9884	0.986607	0.323835	NA
CTTCCTTGACGACATATGGCCC	other	1.40258	1.0144	0	0.818124	0.862939	0	-0.482218	2.57388	-0.187351	0.851386	NA
CTTCGTCATCTGATGCGGTTGTTC	F55A4.9, rncs-1	7.0129	1.0144	3.07752	0	0.862939	0.881423	-2.65714	1.68839	-1.57377	0.115541	NA
CTTCTACATCCGTAAGAGGAACC	Y17D7C.3	0	0	0	0	0	0	NA	NA	NA	NA	NA
CTTCTATCATTCTCGAATTCCC	other	1.40258	0	1.02584	0	1.72588	0	-0.464599	2.72049	-0.170777	0.864399	NA
CTTCTGATCCTAGATGAACAATG	24F12A.4, H15N14.4, Y24F12A.3	0	0	0	0	0	0	NA	NA	NA	NA	NA
CTTCTTCCACGCCATCATCCAC	Y57G11C.1145_hairpin	0	0	0	0	0	0	NA	NA	NA	NA	NA
CTTCTTCCACGCCATCATCCACA	Y57G11C.1145_hairpin	0	0	0	0.818124	0	0	0.551839	4.08047	0.135239	0.892423	NA
CTTGAAAATACTAACCCGGTCA	ZK1236.8	0	0	0	0	0	0	NA	NA	NA	NA	NA
CTTGGACTTTTTCGCTGGTTTGG	F55A4.9, rncs-1	2.80516	2.02879	0	0	0.862939	0.881423	-1.4551	2.15626	-0.674825	0.499787	NA
CTTTCAGCATCGACCACGGCTTT	F55A4.9, rncs-1	0	0	0	0	0	0	NA	NA	NA	NA	NA
CTTTGAACGGCCCTTAAAACAC	F31C3.9, rrn-3.1	0	0	0	0	0	0	NA	NA	NA	NA	NA
CTTTGCTCTGCGTCCGACACTTT	VB0395L.1	0	0	0	0	0	0	NA	NA	NA	NA	NA
CTTTTGTTTCTCTTCCTCTTGC	F19B2.5	0	0	0	0	0	0	NA	NA	NA	NA	NA
CTTTTGTTTCTCTTCCTCTTGCT	F19B2.5	0	0	0	0	0	0	NA	NA	NA	NA	NA
CTTTTTCAGCGGTCTCGTTATG	PAL5A	0	0	0	0	0	0	NA	NA	NA	NA	NA
CTTTTTCAGCGGTCTCGTTATGA	PAL5A	0	0	0	0	0	0	NA	NA	NA	NA	NA
CTTTTTTCACCAAGAACGAAACC	E01G4.7	0	0	1.02584	4.90874	0.862939	6.16996	3.29205	1.80103	1.82787	0.067569	NA
CTTTTTTCGTTCTATGTGAGT	F52D2.6	0	0	0	0	0	0	NA	NA	NA	NA	NA
GAAAGACTAATCGAACCATCTA	F31C3.9, rrn-3.1	1.40258	0	0	0	1.72588	1.76285	1.51112	2.53527	0.596037	0.55115	NA
GAAGAATGCTGGAACACGTCGT	Y37E3.30	0	0	2.05168	6.54499	8.62939	0.881423	2.8854	1.60052	1.80279	0.0714218	NA
GAAGACACTTTCCAATTACCC	GAAGACACTTTCCAATTACCC_Repeat, Y116A8C.48	0	0	0	0	0	0	NA	NA	NA	NA	NA
GAAGAGCCGACATCGAAGGATCA	F31C3.10, F31C3.9, rrn-3.1, rrn-3.56	0	0	0	0	0	0	NA	NA	NA	NA	NA
GAAGGCGCGCTCGAAGAGCCGAG	ChrIII_hairpin1	0	1.0144	2.05168	0	0.862939	0.881423	-0.865736	2.39993	-0.360735	0.718298	NA
GAAGGCGCGCTCGAAGAGCCGAGA	ChrIII_hairpin1	4.20774	3.04319	4.10336	3.27249	3.45176	2.64427	-0.270358	1.10605	-0.244436	0.806893	NA
GAAGGGCAAAGAGTGCGATATC	jmjc-1, T28F2.4	0	0	6.15505	0	0	0	-3.72591	2.69582	-1.3821	0.16694	NA
GAATCAGAACACGGGGGCGACA	hmg-1.1, Y48B6A.14	0	1.0144	0	0	0	0.881423	-0.409943	3.9071	-0.104923	0.916437	NA
GAATTGTGAAGACATCTCAGAAA	F43E2.6	0	0	0	0	0	0	NA	NA	NA	NA	NA
GACAGTCCCCACTCTTCTCGA	F31C3.7, F31C3.8, rrn-1.1, rrn-1.2	0	0	0	0	0	0	NA	NA	NA	NA	NA
GACATCTCAGAAACATCGGCA	F43E2.6	2.80516	0	0	4.09062	0.862939	4.40711	1.89986	1.73992	1.09193	0.274866	NA
GACATCTCAGAAACATCGGCAA	F43E2.6	7.0129	1.0144	0	3.27249	0	0	-1.22994	1.8901	-0.650727	0.515222	NA
GACATCTCAGAAACATCGGCAAA	F43E2.6	4.20774	1.0144	2.05168	3.27249	6.90351	1.76285	0.761265	1.22875	0.619543	0.535559	NA
GACCAAGTCGTATGCAAGTGAT	F31C3.10, F31C3.9, rrn-3.1, rrn-3.56	0	0	0	0	0	0	NA	NA	NA	NA	NA
GACGGGCGGTGTGTACAAAGGG	F31C3.7, F31C3.8, rrn-1.1, rrn-1.2	0	0	1.02584	0	0	0	-1.37171	4.08047	-0.336165	0.736746	NA
GACGTACCAACTGGAGGCCCA	F31C3.11, rrn-2.1	0	0	0	0	0	0	NA	NA	NA	NA	NA
GACTGGACCAAACCGCGCGCT	E01G4.5	0	0	0	0	0	0	NA	NA	NA	NA	NA
GAGTCGATGAAAGTGGTGGTAT	F31C3.9, rrn-3.1	0	0	0	0	0	0	NA	NA	NA	NA	NA
GATAGTCTCAACAGATCGCAGT	F31C3.10, F31C3.9, rrn-3.1, rrn-3.56	0	0	0	0	0	0	NA	NA	NA	NA	NA
GATGGTCGACAACCGACGAACA	F19G12.10	2.80516	0	3.07752	0	0	0	-3.63117	2.50409	-1.45009	0.147033	NA
GATTACGTCCCTGCCCTTTGT	F31C3.7, F31C3.8, rrn-1.1, rrn-1.2	2.80516	1.0144	0	2.45437	0	0.881423	-0.130573	2.05411	-0.063567	0.949315	NA
GATTTAGCGCCCCGACATTGA	F31C3.10, F31C3.9, rrn-3.1, rrn-3.56	0	0	0	0	0	0	NA	NA	NA	NA	NA
GCAAGCTGCGTTCTTCATCGAT	F31C3.11, rrn-2.1	0	0	0	0	0	0	NA	NA	NA	NA	NA
GCAAGTGATTTAGCGCCCCGAC	F31C3.10, F31C3.9, rrn-3.1, rrn-3.56	0	0	0	0	0	0	NA	NA	NA	NA	NA
GCAGCCAAAGACTGATCGATTC	F31C3.9, rrn-3.1	0	0	0	0	0	0	NA	NA	NA	NA	NA
GCCCGGTGTTGTACGTAGGTGG	T05E12.8	0	1.0144	3.07752	3.27249	0	0	-0.344803	2.15339	-0.160121	0.872785	NA
GCCCTTACCGTTTAATACATGTT	mir-5592	0	3.04319	0	4.09062	0	0.881423	0.665635	2.10645	0.315999	0.752004	NA
GCCCTTTGTACACACCGCCCGTC	F31C3.7, F31C3.8, rrn-1.1, rrn-1.2	0	0	0	0	0	0	NA	NA	NA	NA	NA
GCCGATGTTTCTGAGATGTCTT	F43E2.6	4.20774	5.07199	2.05168	21.2712	4.31469	7.05138	1.53736	0.906214	1.69647	0.0897973	NA
GCCGATGTTTCTGAGATGTCTTC	F43E2.6	0	1.0144	1.02584	1.63625	5.17763	0.881423	1.83707	1.82053	1.00908	0.312935	NA
GCCGATGTTTCTGAGATGTCTTCA	F43E2.6	0	0	0	0	0.862939	0	0.551839	4.08047	0.135239	0.892423	NA
GCGCCCCGACATTGAACCAGAG	F31C3.10, F31C3.9, rrn-3.1, rrn-3.56	0	0	0	0	0	1.76285	1.48791	4.03425	0.368819	0.712263	NA
GCGGAGATTCACTGGAGATTTG	lin-5, T09A5.10	1.40258	4.05759	2.05168	2.45437	0	0	-1.60559	1.80332	-0.890353	0.373276	NA
GCGTGCAGCCCCGGACATCTAA	F31C3.7, F31C3.8, rrn-1.1, rrn-1.2	0	0	0	0	0	0	NA	NA	NA	NA	NA
GCTACACCTCTCATGACTCTT	F31C3.9, rrn-3.1	0	0	0	0	0	0	NA	NA	NA	NA	NA
GGACCACCGAGACGCATGATA	Y37E3.30	0	0	0	0	0	0	NA	NA	NA	NA	NA
GGAGCTGGACGATGGATTCTT	F55A4.9, rncs-1	0	0	0	0	0	0	NA	NA	NA	NA	NA
GGAGCTGGACGATGGATTCTTTG	F55A4.9, rncs-1	2.80516	0	0	4.90874	0	0	0.913288	2.33609	0.390947	0.695836	NA
GGAGGGATGCGAAATAAATATTTT	Y57G11C.36, Y57G11C.51	4.20774	0	0	0	0	0.881423	-2.14019	2.72884	-0.784286	0.432872	NA
GGAGTGGATGACGACGACGATGG	Y57G11C.1145_hairpin	8.41548	0	4.10336	0.818124	1.72588	0	-2.26442	1.6141	-1.4029	0.160648	NA
GGATTTCGTCAAGACCGAGGAGCT	C36A4.14	1.40258	1.0144	0	4.90874	0	3.52569	1.86006	1.83835	1.01181	0.311629	NA
GGCCCTTACCGTTTAATACATGT	mir-5592	1.40258	0	5.12921	0	0	0.881423	-2.84047	2.25214	-1.26123	0.207225	NA
GGGAGGAAAGCTGGGATTATCC	Y37E3.30	0	0	0	0	0	0	NA	NA	NA	NA	NA
GGGATAAGAGCTCGTCCGATGGCG	T05E12.8	0	0	0	0	0	2.64427	2.07393	3.69423	0.561396	0.574528	NA
GGGCATCGAGCTGAAAGAGAGAGC	F55A4.9, rncs-1	4.20774	0	0	0	4.31469	0	0.107738	2.23201	0.0482696	0.961501	NA
GGGGTATATATGGGTTCTAAGATC	Y116F11A.1	0	1.0144	0	0	1.72588	0	0.498641	3.39419	0.14691	0.883203	NA
GGTGAGACATGGTATCGAGATATG	Y37E11B.2	4.20774	0	0	4.90874	3.45176	4.40711	1.75581	1.46099	1.2018	0.229442	NA
GGTGAGGTGTTGGTGCTGATGGCA	C36A4.14	0	1.0144	0	0	0	0	-1.37171	4.08047	-0.336165	0.736746	NA
GTCGTCGTCATCCACTCCACCG	Y57G11C.1145_hairpin	7.0129	6.08638	1.02584	0.818124	0	0	-3.9305	1.7517	-2.24382	0.0248437	NA
GTCGTCGTCATCCACTCCACCGA	Y57G11C.1145_hairpin	8.41548	7.10078	9.23257	0	0	0	-5.71443	1.53247	-3.72891	0.000192311	NA
GTGAAGACATCTCAGAAACATCG	F43E2.6	0	0	0	0.818124	0.862939	0	1.42815	4.03956	0.353542	0.723682	NA
GTGCCTAACTTCTCGCTCATGA	F31C3.9, rrn-3.1	1.40258	0	0	0	0	0	-1.37171	4.08047	-0.336165	0.736746	NA
GTGGAGCCTGCACTGTTGATTTC	T05E12.8	0	7.10078	1.02584	4.90874	1.72588	5.28854	0.503104	1.27991	0.393076	0.694263	NA
GTGGAGCTGGACGATGGATTCTTT	F55A4.9, rncs-1	0	0	0	0	0	1.76285	1.48791	4.03425	0.368819	0.712263	NA
GTGGAGTGGATGACGACGACG	Y57G11C.1145_hairpin, Y57G11C.51	7.0129	13.1872	4.10336	10.6356	4.31469	5.28854	-0.266364	0.81825	-0.325529	0.744781	NA
GTGTAACAATCTATTTTTTCGT	GTGTAACAATCTATTTTTTCGT_repeat	0	0	0	0	0	0	NA	NA	NA	NA	NA
GTTCTGTGGGCGGGGCCAATCC	DNA-8-1	0	0	0	0	0	0	NA	NA	NA	NA	NA
GTTTCCAGCAGTGTCGTATGTCC	F31C3.9, rrn-3.1	0	1.0144	3.07752	0	0	0	-3.14236	2.86017	-1.09866	0.271915	NA
GTTTGATCTCCGAGAATTGCGGG	dnj-27_element	0	0	0	0	0	0	NA	NA	NA	NA	NA
GTTTGGCCAAGCGGACTGGAGC	F55A4.9, rncs-1	0	0	1.02584	0	3.45176	2.64427	2.3177	2.23954	1.0349	0.300715	NA
GTTTGGCCAAGCGGACTGGAGCA	F55A4.9, rncs-1	0	0	1.02584	0	0.862939	0	-0.409943	3.91265	-0.104774	0.916555	NA
TAAAAAATTCAAATTTAACTCCG	Y69A2AR.16_hairpin	0	0	0	0	0	0	NA	NA	NA	NA	NA
TAAAACTGCGTGGCGTGTACTGC	PALTA3	1.40258	9.12958	0	3.27249	3.45176	3.52569	-0.0663586	1.26194	-0.0525847	0.958063	NA
TAAACATAGCGGCGCGCGGAAC	PALTA3	0	3.04319	1.02584	1.63625	8.62939	0.881423	1.38855	1.50852	0.920473	0.357326	NA
TAAACATAGCGGCGCGCGGAACA	PALTA3	0	0	0	1.63625	0	0	1.39447	4.04264	0.34494	0.730139	NA
TAAACATAGCGGCGCGCGGAACT	PALTA3, talp-3, Y48A6C.4, Y57G11C.32	4.20774	0	1.02584	2.45437	4.31469	1.76285	0.792878	1.48612	0.533521	0.593673	NA
TAAACGCAGCGGCGCGCGGAACC	PALTA3	0	0	0	0	0	0	NA	NA	NA	NA	NA
TAAACGGTAAGGGCCGGCTGG	mir-5592, R07C3.18, R07C3.19	0	3.04319	2.05168	3.27249	0	1.76285	-0.0561129	1.73875	-0.0322719	0.974255	NA
TAAAGACGTGGTTTTGACGAAAA	other, Y54G11A.1	0	0	0	1.63625	0	0.881423	2.01094	3.43444	0.585523	0.558196	NA
TAAAGTCCATGGACGGCGAGATT	other	0	0	0	0	0	0	NA	NA	NA	NA	NA
TAAAGTCGATGGACGGCGAGATT	PALTTAA1	0	1.0144	3.07752	4.09062	1.72588	1.76285	0.834619	1.56849	0.532116	0.594646	NA
TAAATCTACTTAAATCAACGAAT	mek-2, Y54E10BL.6, Y71F9AL.1	0	3.04319	0	0.818124	0	3.52569	0.46027	2.16493	0.212602	0.831637	NA
TAACAGGGATGAAGTAACGCC	other	0	0	0	0	0	0	NA	NA	NA	NA	NA
TAACAGGGATGAAGTAACGCCA	other	0	0	0	0	0	0	NA	NA	NA	NA	NA
TAACGAGACCGCTGAAAAAGTC	W09C5.9	0	0	0	0	0	0	NA	NA	NA	NA	NA
TAACGAGACCGCTGAAAAAGTT	PAL5A	0	0	0	0	0	0	NA	NA	NA	NA	NA
TAACGAGACCGCTGAAAAAGTTC	PAL5A	0	0	0	0	0	0	NA	NA	NA	NA	NA
TAACGAGACCGCTGAAAAAGTTT	PAL5A	0	0	0	0	0	0	NA	NA	NA	NA	NA
TAATTCTGCAGCCACTTCCGAA	W03D2.15	0	2.02879	6.15505	9.81748	4.31469	6.16996	1.25269	1.07794	1.16212	0.245189	NA
TAATTGGAAAAGATTAGAGATG	F55A4.9, rncs-1	0	0	0	0	2.58882	0.881423	2.4681	3.04148	0.811479	0.41709	NA
TACAACGTGCAACTAAGACACCC	Y37E3.30	0	0	0	0.818124	0	0	0.551839	4.08047	0.135239	0.892423	NA
TACACGAGCTGCGTAAATCGAC	other	0	0	0	0	2.58882	0	2.0466	3.7245	0.549497	0.582665	NA
TACATAGATGCCGAGTACAACCC	E01G4.5	0	0	2.05168	0.818124	0	0	-1.19268	3.34107	-0.356974	0.721112	NA
TACCACCACTTTCATCGACTCTT	F31C3.9, rrn-3.1	0	0	0	0	0	0	NA	NA	NA	NA	NA
TACCGTACCCCGAAAACTAGAA	ChrIII_hairpin2	0	0	0	0	0	0	NA	NA	NA	NA	NA
TACCTGATTTTCATAACGAGACC	PAL5A	0	0	0	0	0	0	NA	NA	NA	NA	NA
TACGAGGGAATTGACTAGTTTCA	F55A4.9, rncs-1	0	0	0	0	0	0	NA	NA	NA	NA	NA
TACGGGAAAAGCAGAGAGGCC	F39E9.7	0	2.02879	0	5.72686	3.45176	1.76285	2.34585	1.7006	1.37942	0.167765	NA
TACGGGAAAAGCAGAGAGGCCA	F39E9.7	1.40258	1.0144	2.05168	8.18124	3.45176	0	1.38387	1.47096	0.940793	0.346811	NA
TACGGGAAAAGCAGAGAGGCCAC	F39E9.7	0	0	0	0	0	0	NA	NA	NA	NA	NA
TACGGTTTGATCTACAAAAAATGC	CELE14B	11.2206	2.02879	0	0	2.58882	0	-2.32455	1.71504	-1.35539	0.175292	NA
TACGTCACAACTGTATTAAAAT	TC8	0	0	0	0	0	0	NA	NA	NA	NA	NA
TACGTTTACATGGAGGTCCCGC	F39E9.29_region, F39E9.7	0	1.0144	0	0	0	4.40711	1.84781	2.66521	0.693308	0.488116	NA
TACGTTTACATGGAGGTCCCGCC	F39E9.29_region, F39E9.7	1.40258	5.07199	3.07752	2.45437	0.862939	0	-1.53024	1.53719	-0.995483	0.319502	NA
TACTGTAGCGCTGGTGTCGATTT	other	0	0	0	0	0	0	NA	NA	NA	NA	NA
TACTGTAGCGCTTGTGTCGATT	CELE1	0	0	0	4.09062	0	0	2.71417	3.1233	0.869007	0.384843	NA
TACTGTAGCGCTTGTGTCGATTT	CELE1	0	0	0	0	0	1.76285	1.48791	4.03425	0.368819	0.712263	NA
TAGAACGTGTCGCTTCGTCATCTG	F55A4.9, rncs-1	0	0	0	0	5.17763	0	3.04674	2.87537	1.0596	0.289327	NA
TAGAAGACCACTTCCGCAGACG	Y37E3.30	1.40258	6.08638	1.02584	0.818124	0.862939	9.69565	0.387177	1.33123	0.290842	0.771172	NA
TAGAAGACCACTTCCGCAGACGC	Y37E3.30	2.80516	0	1.02584	0	0	0	-2.99268	2.94815	-1.01511	0.310055	NA
TAGAAGCCGCCGGGATGGACACC	E01G4.5	0	0	0	0	0	0	NA	NA	NA	NA	NA
TAGATCAAACCGTCATGGGAC	CELE14B	0	0	0	0	0	0	NA	NA	NA	NA	NA
TAGATCAAACCGTCATGGGACA	CELE14B	0	2.02879	0	0	0	0	-2.13597	4.05034	-0.527355	0.597947	NA
TAGCCTGAGTCTCAACCAAAAC	hpo-13, Y105E8A.10	0	0	0	0	0.862939	0	0.551839	4.08047	0.135239	0.892423	NA
TAGCGAAAACTACAGTAAGAACT	PALTA4	2.80516	0	0	0.818124	0	0.881423	-0.637248	2.64999	-0.240472	0.809965	NA
TAGCGAAAACTACAGTAATTCTT	CELE1	0	0	0	0	0	0	NA	NA	NA	NA	NA
TAGGATAATGTCTGGAAATACGG	B0281.4	1.40258	2.02879	0	0	0.862939	2.64427	0.0315137	2.07437	0.0151919	0.987879	NA
TAGGGGAAAAGATGTTGAATG	other	0	0	0	0	0	0	NA	NA	NA	NA	NA
TAGTTTGTAGCCTGAGCCTCAAC	other	0	0	0	0.818124	0	0	0.551839	4.08047	0.135239	0.892423	NA
TAGTTTTCGGGGTACGGTATCT	ChrIII_hairpin2	4.20774	3.04319	2.05168	3.27249	13.807	10.5771	1.5942	0.951504	1.67545	0.093846	NA
TATACCACTCTATCAGACTACT	W04C9.8	0	0	0	1.63625	0	0	1.39447	4.04264	0.34494	0.730139	NA
TATCAGGCCGCCGACATCTCATG	PALTA3	0	0	0	0	0	0	NA	NA	NA	NA	NA
TATCCACGACGGCCGACAATTTCC	Unknown_hairpin_RE2	0	0	0	0	0	0	NA	NA	NA	NA	NA
TATCCACTGAGCTATCCATGC	irld-17, Y46H3D.4	0	0	0	0	0	0	NA	NA	NA	NA	NA
TATCGCACTCTTTGCCCTTCCG	jmjc-1, T28F2.4	0	1.0144	0	0	0	0	-1.37171	4.08047	-0.336165	0.736746	NA
TATCGCACTCTTTGCCCTTCCGC	jmjc-1, T28F2.4	0	0	0	0	0	0	NA	NA	NA	NA	NA
TATCTACACTCTCTGTACCGG	Unknown_RE2	0	0	0	0	0	0	NA	NA	NA	NA	NA
TATCTCGATACCATGTCTCACC	Y37E11B.2	0	0	0	0	2.58882	1.76285	2.79408	2.77676	1.00624	0.314301	NA
TATCTCGATACCATGTCTCACCC	Y37E11B.2	0	2.02879	2.05168	0.818124	3.45176	0.881423	0.281109	1.73186	0.162317	0.871057	NA
TATCTCGATACCATGTCTCACCCA	Y37E11B.2	0	0	0	0	0	0	NA	NA	NA	NA	NA
TATGTTTAACTCGCAGCGGGCA	other	0	0	0	0.818124	0	0	0.551839	4.08047	0.135239	0.892423	NA
TATTAAACGGTAAGGGCCGGCTGG	mir-5592	2.80516	21.3023	9.23257	2.45437	2.58882	0	-2.73386	1.06166	-2.57507	0.0100219	NA
TATTAGACTCCACATATCATTT	Y37E11B.2	1.40258	7.10078	5.12921	6.54499	4.31469	4.40711	0.129636	0.978824	0.13244	0.894636	NA
TATTAGACTCCACATATCATTTC	Y37E11B.2	0	1.0144	1.02584	4.90874	5.17763	5.28854	2.81635	1.50019	1.87732	0.0604742	NA
TATTCCTGATGCGGCGCCGGCT	T05E12.8	5.61032	6.08638	0	4.90874	6.90351	3.52569	0.412387	1.08689	0.379419	0.704376	NA
TATTCCTGATGCGGCGCCGGCTC	T05E12.8	0	0	0	5.72686	0.862939	0	3.40172	2.44882	1.38913	0.164794	NA
TATTGAAAATGTGGGATGACGC	E01G4.7	0	0	0	0	0.862939	0	0.551839	4.08047	0.135239	0.892423	NA
TATTTGGAACAGAAGCAAGAGG	F19B2.5	0	0	0	0	0.862939	0	0.551839	4.08047	0.135239	0.892423	NA
TATTTGGAACAGAAGCAAGAGGA	F19B2.5	0	0	0	0.818124	0	0	0.551839	4.08047	0.135239	0.892423	NA
TATTTTCCGACTTCTCATGAGCC	other	4.20774	2.02879	2.05168	0.818124	5.17763	3.52569	0.223577	1.25161	0.178632	0.858227	NA
TATTTTTTGGCACCGCTGTTCTG	F55A4.9, rncs-1	11.2206	5.07199	5.12921	0.818124	6.04057	3.52569	-1.02887	0.982687	-1.04699	0.295103	NA
TCAAAATCGGACGACCGGACGC	Unknown_hairpin_RE2	0	0	0	0	0	0	NA	NA	NA	NA	NA
TCAAAATTTGACGGTGATTTCAA	PALTTAA1	0	0	0	0	0	0	NA	NA	NA	NA	NA
TCAAACATTCGGCAATGGGGTA	Y37E3.30	0	0	0	2.45437	2.58882	0	3.01285	2.62483	1.14783	0.25104	NA
TCAAAGGATCCGGTGAGGCTA	W04B5.8	0	0	0	0	0	0	NA	NA	NA	NA	NA
TCAAAGGATCCGGTGAGGCTAA	W04B5.8	0	0	0	0	0	0	NA	NA	NA	NA	NA
TCAACTTCTTCCACGCCATCATC	Y57G11C.1145_hairpin	2.80516	0	0	0	0	0	-2.52931	3.62414	-0.697905	0.485237	NA
TCAATAAAAACAATGGACAACT	Y59H11AR.6	0	2.02879	3.07752	1.63625	0	0	-1.65066	2.23689	-0.737928	0.460558	NA
TCAATAAAAACAATGGACAACTG	Y59H11AR.6	0	0	0	0	0	0	NA	NA	NA	NA	NA
TCAATGACGGAGTCGAGATCGA	Y37E11B.2	4.20774	4.05759	0	6.54499	13.807	11.4585	1.98194	0.958988	2.0667	0.0387623	NA
TCAATTGTTGTGAAGCTAGCTCC	W03D2.15	0	0	0	0	0	0	NA	NA	NA	NA	NA
TCACGAGGGACGAGGAAAAGTG	PAL5A	0	0	0	2.45437	0	0	1.97759	3.80234	0.520097	0.602996	NA
TCACGCATTTTTTGTAGATCAAA	other, Y57A10A.1	0	0	0	0	0	0	NA	NA	NA	NA	NA
TCACGGAGTTAAATTTGAATT	Y69A2AR.16_hairpin	0	0	1.02584	0	0.862939	0	-0.409943	3.91265	-0.104774	0.916555	NA
TCACGGAGTTAAATTTGAATTTT	Y69A2AR.16_hairpin	0	7.10078	0	0	0	0	-3.93343	2.57174	-1.52948	0.126145	NA
TCACGGAGTTAAATTTGAATTTTT	Y69A2AR.16_hairpin	0	5.07199	1.02584	0	0	0	-3.71792	2.49461	-1.49038	0.136125	NA
TCACGGCAACTCGGTCCAAAACC	PALNN1	0	1.0144	0	0	0	0	-1.37171	4.08047	-0.336165	0.736746	NA
TCACGGGGAAAAGGCAAAATTCG	PALTA3	0	0	1.02584	0	0	0	-1.37171	4.08047	-0.336165	0.736746	NA
TCACGTCATTATGTCACAATCCC	F39F10.4	0	0	0	0	0	0	NA	NA	NA	NA	NA
TCACTGTTGCGGATGGTCCAGG	F57G8.14, F57G8.15, linc-59	0	0	0	0	0	0	NA	NA	NA	NA	NA
TCAGAAACATCGGCAAATGGC	F43E2.6	0	0	0	0	0	0	NA	NA	NA	NA	NA
TCAGCGGTCTCGTTATGAAAATC	PAL5A	0	1.0144	0	0.818124	0	0	-0.409943	3.95811	-0.10357	0.91751	NA
TCAGGCCGCCGACATCCTACGGG	PALTA3	0	0	0	0	0	0	NA	NA	NA	NA	NA
TCAGGCCGCCGACATCTCACGGG	PALTA3	0	0	0	0	0	0	NA	NA	NA	NA	NA
TCAGGCCGCCGACATCTCATG	PALTA3	0	0	0	0	0	0	NA	NA	NA	NA	NA
TCAGGCCGCCGACATCTCATGGA	Y105C5B.11	0	0	0	0	0	0	NA	NA	NA	NA	NA
TCAGGCCGCCGACATCTCATGGG	PALTA3	1.40258	0	0	0	0	0	-1.37171	4.08047	-0.336165	0.736746	NA
TCAGGCCGCCGACATCTCATGGGT	PALTA3	0	0	0	0	0	0	NA	NA	NA	NA	NA
TCATCAGCTCCATCAACACCA	C36A4.14	0	0	0	0	0	0	NA	NA	NA	NA	NA
TCATCAGCTCCATCAACACCACC	C36A4.14	0	7.10078	3.07752	0	2.58882	1.76285	-1.26802	1.5366	-0.825212	0.409251	NA
TCATCAGCTCCATCAACACCACCA	C36A4.14	0	0	0	0	0	0	NA	NA	NA	NA	NA
TCATCCTCGCCGCAGCCATCGT	Y57G11C.1145_hairpin	0	0	0	0	0	0	NA	NA	NA	NA	NA
TCATCCTCGCCGCAGCCATCGTC	Y57G11C.1145_hairpin	0	0	2.05168	0.818124	0.862939	2.64427	1.01316	2.16771	0.467388	0.640223	NA
TCATCCTCGCCGCAGCCATCGTCG	Y57G11C.1145_hairpin	0	0	0	0	0	0	NA	NA	NA	NA	NA
TCATCTAAACAACCGTACTGGA	F31C3.9, rrn-3.1	0	0	1.02584	0	0	0	-1.37171	4.08047	-0.336165	0.736746	NA
TCATCTAAGGCTAAATATCGA	F31C3.9, rrn-3.1	0	1.0144	0	0.818124	0	0	-0.409943	3.95811	-0.10357	0.91751	NA
TCATCTCAACCAAGATCTCAAC	F52D2.6	0	0	0	0	0	0	NA	NA	NA	NA	NA
TCATCTCTGATCTTTTCCAAT	F55A4.9, rncs-1	0	0	0	0	0	0.881423	0.551839	4.08047	0.135239	0.892423	NA
TCATCTCTGATCTTTTCCAATT	F55A4.9, rncs-1	1.40258	3.04319	4.10336	0	0.862939	0	-3.23594	1.9472	-1.66184	0.0965441	NA
TCATCTCTGATCTTTTCCAATTC	F55A4.9, rncs-1	0	0	0	0	0	0	NA	NA	NA	NA	NA
TCATGATTTATTGTTCCCGTAAT	PALTA4	0	0	0	0	0	0	NA	NA	NA	NA	NA
TCATGCGTCTCGGTGGTCCGA	Y37E3.30	0	0	0	0	0	0	NA	NA	NA	NA	NA
TCATGCGTCTCGGTGGTCCGAA	Y37E3.30	0	2.02879	0	0.818124	5.17763	3.52569	2.14422	1.79001	1.19788	0.230963	NA
TCCACATCATCCTCGCCGCAGCC	Y57G11C.1145_hairpin	0	0	0	0	0	0	NA	NA	NA	NA	NA
TCCACGCCATCATCCACATCATCC	Y57G11C.1145_hairpin	0	0	0	0	0	0	NA	NA	NA	NA	NA
TCCACGGCGGCCGACAATTTC	Unknown_hairpin_RE2	0	0	0	0	0	0	NA	NA	NA	NA	NA
TCCACGGCGGCCGACAATTTCC	Unknown_hairpin_RE2	0	0	1.02584	0	0	0	-1.37171	4.08047	-0.336165	0.736746	NA
TCCACGGCGGCCGACAATTTCCG	Unknown_hairpin_RE2	0	0	0	0	0	0	NA	NA	NA	NA	NA
TCCATTGTATTTTCTCAGGACC	F39E9.28	0	0	0	1.63625	2.58882	0	2.7566	2.80375	0.983185	0.325516	NA
TCCCACGATTTCATTTGCACTG	Unknown_RE7	0	0	0	0	0	0	NA	NA	NA	NA	NA
TCCCGCAATTCTCGTAGATCAAA	other	0	0	0	0	0	0	NA	NA	NA	NA	NA
TCCCGCATTTCTTGTAGATCAAA	CELE14B	0	0	0	1.63625	0	0	1.39447	4.04264	0.34494	0.730139	NA
TCCCGCATTTCTTGTAGATCACA	H24K24.4, trm-2A	0	1.0144	2.05168	0	1.72588	0	-0.870662	2.54872	-0.341608	0.732646	NA
TCCCGCATTTTTCGTAGATCAAA	CELE14B	0	0	0	0	0	0	NA	NA	NA	NA	NA
TCCCGCATTTTTGTAGATCACA	CELE14B	0	0	0	0	0	0	NA	NA	NA	NA	NA
TCCCGCATTTTTTGTAGATCAA	CELE14B	0	0	0	0	0	0	NA	NA	NA	NA	NA
TCCCGCATTTTTTGTAGATCAAA	CELE14B	12.6232	11.1584	5.12921	2.45437	4.31469	9.69565	-0.807063	0.82388	-0.979589	0.327289	NA
TCCCGCATTTTTTGTAGATCACA	CELE14B	0	0	0	0	0	0	NA	NA	NA	NA	NA
TCCCGCATTTTTTGTAGATCAGA	CELE14B	0	0	0	0	0	0	NA	NA	NA	NA	NA
TCCCGGATGTCTGTCACTCTCT	Unknown_RE2	0	0	0	0	0	0	NA	NA	NA	NA	NA
TCCCTGCCCTTTGTACACACCG	F31C3.7, F31C3.8, rrn-1.1, rrn-1.2	0	0	0	0	0	0	NA	NA	NA	NA	NA
TCCGAACAAAAGAGTAACTATT	other	0	0	0	0	0	0	NA	NA	NA	NA	NA
TCCGATTTCTGCCCCCCAAAAT	PAL8C	0	0	0	0	0	0	NA	NA	NA	NA	NA
TCCGATTTCTGCCCCCCAAAATG	PAL5A	0	0	0	0	0	0	NA	NA	NA	NA	NA
TCCGATTTCTGCCCCCCCAAA	PAL8C	0	2.02879	0	0	0	0	-2.13597	4.05034	-0.527355	0.597947	NA
TCCGATTTCTGCCCCCCCAAAA	PAL8C	0	0	0	0	0	0	NA	NA	NA	NA	NA
TCCGATTTCTGCCCCCCCAAAAT	PAL8C	0	0	0	0	0	0	NA	NA	NA	NA	NA
TCCGATTTCTGCCCCCCCAAAATG	PAL8C	14.0258	9.12958	10.2584	0	0	0.881423	-5.17853	1.43661	-3.6047	0.000312514	NA
TCCGCGCACCGCTATGTTTAACT	other, Y64G10A.10	0	0	0	0	0	0	NA	NA	NA	NA	NA
TCCGCGCGCCGCTACGTTTAACT	other, Y105C5A.15	0	0	0	0	0	0	NA	NA	NA	NA	NA
TCCGCGCGCCGCTATGTTTAAC	PALTA3	1.40258	2.02879	0	2.45437	0.862939	0	-0.0289063	2.0897	-0.0138327	0.988963	NA
TCCGCGCGCCGCTATGTTTAACT	PALTA3	4.20774	2.02879	2.05168	4.09062	6.90351	5.28854	1.00888	1.06616	0.946276	0.344008	NA
TCCGCGCGCCGCTATGTTTAACTT	PALTA3	0	0	0	0	0	0	NA	NA	NA	NA	NA
TCCGCGCGCCGCTGCGTTTAACT	PALTA3	0	0	0	0	0	0	NA	NA	NA	NA	NA
TCCGCGCGCCGCTGTGTTTAACT	other	0	0	3.07752	0	0	0	-2.72754	3.47628	-0.784614	0.43268	NA
TCCGCGCGTCGCTATGTTTAACT	PALTA3	2.80516	0	0	0.818124	0.862939	0	-0.64839	2.65378	-0.244327	0.806978	NA
TCCGGCGTCCCTTTTGTAGAAAA	mtd-1, other, ZK337.5	0	0	0	0	0	0	NA	NA	NA	NA	NA
TCCGGTTCAGAGCAGATGACAA	Y17D7C.3	0	0	0	0	0.862939	0	0.551839	4.08047	0.135239	0.892423	NA
TCCGGTTCAGAGCAGATGACAAC	Y17D7C.3	0	0	1.02584	3.27249	0	1.76285	2.04984	2.35759	0.869465	0.384593	NA
TCCGTCAGTCTTTTGTGAACAA	dnj-12, F39B2.10	0	0	0	0	0	0	NA	NA	NA	NA	NA
TCCGTGTCACATCTGTCCGAA	PALTTAA3	0	0	0	0	0	0	NA	NA	NA	NA	NA
TCCGTGTCACATCTGTCCGAAAT	other	0	0	0	0	0	0	NA	NA	NA	NA	NA
TCCTCAGCCTCACTTAAACTCTT	M4.2, puf-4	0	0	0	0	0	0	NA	NA	NA	NA	NA
TCCTCATCTCTGATCTTTTCCA	F55A4.9, rncs-1	0	0	0	0	0	0	NA	NA	NA	NA	NA
TCCTCATCTCTGATCTTTTCCAA	F55A4.9, rncs-1	1.40258	2.02879	1.02584	0	0	0.881423	-2.28261	2.33568	-0.97728	0.328431	NA
TCCTCGGTCTTGACGAAATCCC	C36A4.14	0	0	0	0	0	0	NA	NA	NA	NA	NA
TCCTGATCGCTCATCTAAACAACC	F31C3.9, rrn-3.1	1.40258	0	2.05168	0	0.862939	0.881423	-0.98616	2.34625	-0.420313	0.674257	NA
TCCTTCGATGTCGGCTCTTCCT	F31C3.10, F31C3.9, rrn-3.1, rrn-3.56	2.80516	1.0144	5.12921	0.818124	0	4.40711	-0.786267	1.4978	-0.524948	0.599619	NA
TCCTTCGATGTCGGCTCTTCCTAT	F31C3.10, F31C3.9, rrn-3.1, rrn-3.56	2.80516	5.07199	16.4135	12.2719	3.45176	4.40711	-0.289422	0.88061	-0.328661	0.742412	NA
TCGACAACTAATTCCCGAATCT	T05E12.8	0	0	0	0	0	0	NA	NA	NA	NA	NA
TCGACAACTAATTCCCGAATCTC	T05E12.8	0	0	0	3.27249	0	0.881423	2.73491	2.84816	0.960236	0.336936	NA
TCGACACATTGATCATGCTGATA	other	2.80516	0	0	0	0	0	-2.52931	3.62414	-0.697905	0.485237	NA
TCGCCGCAGCCATCGTCGTCGTC	Y57G11C.1145_hairpin	0	0	0	0	0.862939	0.881423	1.47455	3.99406	0.369186	0.711989	NA
TCGCGACCAGCCCTGCGTCTTGC	Y57G11C.51	0	0	0	0	0	0	NA	NA	NA	NA	NA
TCGCGTAGATCACATGTAGATCA	pcp-4, Unknown_RE8, Y116F11B.3, Y15E3A.3, Y6B3B.7, Y6B3B.9	0	0	0	0	0	0	NA	NA	NA	NA	NA
TCGGAAACTGAAGCCCCAAAATC	other	0	0	0	0	0	0	NA	NA	NA	NA	NA
TCGGAAATTGTCGGCCGCCGTG	Unknown_hairpin_RE2	0	0	0	0	0	0	NA	NA	NA	NA	NA
TCGGCTCTTCGAGCGCGTCTTCTT	ChrIII_hairpin1	0	0	0	0	0	0	NA	NA	NA	NA	NA
TCGGGGACCAACCAATATCAGGC	PALTA3	0	0	0	0	0.862939	6.16996	3.48538	2.40585	1.44871	0.147418	NA
TCGGGGACCAACCAATATCAGGT	C34G6.1, H05C05.2, hpo-27	0	0	0	0	0.862939	0	0.551839	4.08047	0.135239	0.892423	NA
TCGGGGGATGTCCAATTGGGGG	DNA-8-1	0	0	0	0	0	0	NA	NA	NA	NA	NA
TCGTATGATGCAAGTGGAATTT	F52D2.6	0	0	0	0	0	0	NA	NA	NA	NA	NA
TCGTCGTCATCCACTCCACCG	Y57G11C.1145_hairpin	0	3.04319	0	0	0	2.64427	-0.249611	2.55987	-0.0975093	0.922322	NA
TCGTCGTCATCCACTCCACCGA	Y57G11C.1145_hairpin	1.40258	7.10078	15.3876	1.63625	2.58882	5.28854	-1.36141	1.00865	-1.34974	0.1771	NA
TCGTCGTCGTCATCCACTCCAC	Y57G11C.1145_hairpin	1.40258	0	0	0	0	0	-1.37171	4.08047	-0.336165	0.736746	NA
TCGTCGTCGTCATCCACTCCACC	Y57G11C.1145_hairpin	7.0129	1.0144	2.05168	0	0	0.881423	-3.42355	1.90643	-1.79579	0.0725285	NA
TCGTCGTCGTCATCCACTCCACT	Y57G11C.1145_hairpin	0	2.02879	0	0	0.862939	0	-1.18242	3.33185	-0.354884	0.722676	NA
TCGTTGATTTAAGTAGATTTATG	Y71F9AL.1_hairpin	0	0	0	1.63625	0	0	1.39447	4.04264	0.34494	0.730139	NA
TCTACAGAAGGGACGCCGGAAA	other	0	0	0	0	0	0	NA	NA	NA	NA	NA
TCTACAGAGTCTGGAGAATGT	C36A4.11, K06B9.6	2.80516	13.1872	8.20673	9.81748	7.76645	2.64427	-0.281627	0.842076	-0.334444	0.738045	NA
TCTCAGAAACATCGGCAAATG	F43E2.6	1.40258	4.05759	2.05168	5.72686	0	6.16996	0.641129	1.3044	0.491513	0.623064	NA
TCTCAGAAACATCGGCAAATGG	F43E2.6	0	0	1.02584	1.63625	0	1.76285	1.4802	2.61628	0.565766	0.571553	NA
TCTCAGAAACATCGGCAAATGGC	F43E2.6	0	0	0	0	0	0	NA	NA	NA	NA	NA
TCTCCTCGTCGAAATCAAAAGG	Y105C5A.14	0	1.0144	0	1.63625	0.862939	5.28854	2.67206	2.00241	1.33442	0.182066	NA
TCTCGCCGTCCATCGACTTTAA	PALTTAA1	0	0	0	0	0	0	NA	NA	NA	NA	NA
TCTCGCCGTCCATCGACTTTAAA	PALTTAA1	0	0	0	0	0	0	NA	NA	NA	NA	NA
TCTCGCCGTCCATGGACTTTAAA	other	0	0	0	0	0	0	NA	NA	NA	NA	NA
TCTCGTAGAACGTGTCGCTTCGT	F55A4.9, rncs-1	4.20774	4.05759	6.15505	0	0.862939	6.16996	-1.05307	1.25222	-0.840963	0.400369	NA
TCTCGTTCCAATTCAACTCCAGA	T05E12.10	0	0	5.12921	0.818124	0	0	-2.50662	2.57762	-0.972453	0.330825	NA
TCTCTCGATGCTCGTCGATCCAG	F55A4.9, rncs-1	5.61032	2.02879	0	1.63625	7.76645	3.52569	0.824088	1.27452	0.646589	0.517898	NA
TCTCTCGTAGAACGTGTCGCTTC	F55A4.9, rncs-1	1.40258	5.07199	5.12921	0	4.31469	1.76285	-0.964305	1.33372	-0.723019	0.469668	NA
TCTCTCTTCTCGGCTCTTCGAGC	ChrIII_hairpin1	0	0	0	0	3.45176	0.881423	2.78876	2.80927	0.992702	0.320855	NA
TCTCTGTGTGCTGGTAAGTGGA	Y57G11C.51	1.40258	0	5.12921	3.27249	10.3553	10.5771	1.86452	1.11271	1.67566	0.0938057	NA
TCTCTTCAGCTGACTACACTCT	rft-2, Y47D7A.14_IR, Y47D7A.14_IR_element	2.80516	1.0144	0	6.54499	0.862939	0.881423	1.20251	1.66012	0.724347	0.468852	NA
TCTGAGATGTCTTCACAATTC	F43E2.6	0	1.0144	3.07752	1.63625	7.76645	1.76285	1.3831	1.46857	0.941802	0.346294	NA
TCTGAGATGTCTTCACAATTCT	F43E2.6	4.20774	3.04319	2.05168	0.818124	0.862939	1.76285	-1.42393	1.4595	-0.975623	0.329251	NA
TCTGAGATGTCTTCACAATTCTC	F43E2.6	7.0129	0	0	0	0	0	-3.85659	2.59877	-1.484	0.137808	NA
TCTGCAACTGCCGCACGGTTTT	DNA-8-1	0	0	0	0	1.72588	0	1.46127	4.03659	0.362005	0.717348	NA
TCTGCGGAAGTGGTCTTCTACC	Y37E3.30	0	0	1.02584	1.63625	5.17763	7.05138	3.50418	1.71872	2.03883	0.0414665	NA
TCTGTACGTCCATTTGGCAATA	Y105C5A.14	4.20774	0	0	3.27249	3.45176	7.05138	1.86479	1.44677	1.28894	0.19742	NA
TCTGTCACTCTCTAACTATCTAC	Unknown_RE2	0	0	0	0	0	0	NA	NA	NA	NA	NA
TCTTACTGTAGTTTTCGCTAAG	PALTA4	0	0	0	0.818124	0	0	0.551839	4.08047	0.135239	0.892423	NA
TCTTACTGTAGTTTTCGCTAAGA	PALTA4	0	0	0	1.63625	0.862939	2.64427	3.03764	2.42506	1.2526	0.21035	NA
TCTTAGAACCCATATATACCCCC	Y116F11A.1	0	0	1.02584	0	1.72588	1.76285	1.51144	2.60085	0.581134	0.56115	NA
TCTTAGAACCCATATATACCCCCT	Y116F11A.1	0	0	0	0	0	0	NA	NA	NA	NA	NA
TCTTCCACGCCATCATCCACATC	Y57G11C.1145_hairpin	0	0	2.05168	0	0.862939	3.52569	1.03687	2.31162	0.448545	0.65376	NA
TCTTCCTGATGTTCTGATCCTTC	Unknown_IR1	0	0	0	0	0	0	NA	NA	NA	NA	NA
TCTTCTCGGCTCTTCGAGCGCGT	ChrIII_hairpin1	0	0	0	0	0	0	NA	NA	NA	NA	NA
TCTTCTCGGCTCTTCGAGCGCGTC	ChrIII_hairpin1	0	0	0	0	0	0	NA	NA	NA	NA	NA
TCTTGCTTCTGTTCCAAATATG	F19B2.5	0	0	0	0	0	0	NA	NA	NA	NA	NA
TCTTGCTTCTGTTCCAAATATGC	F19B2.5	0	0	0	0	0	0	NA	NA	NA	NA	NA
TGAAAGAGAGAGCAGAACAGCG	F55A4.9, rncs-1	0	2.02879	0	2.45437	0.862939	0	0.663004	2.4521	0.270383	0.786866	NA
TGAAAGGATCGGGACGATTAGG	ChrX_intergenic1	1.40258	0	3.07752	0	0.862939	0	-2.28845	2.48565	-0.920664	0.357226	NA
TGAAAGGATCGGGACGATTAGGA	ChrX_intergenic1	0	1.0144	0	0	0	0	-1.37171	4.08047	-0.336165	0.736746	NA
TGAAATCGTGGGAGGGGCTTAAA	Unknown_RE7	0	0	0	0	0	0	NA	NA	NA	NA	NA
TGAAATCGTGGGCGGGGCTTAAA	mir-5550_RE	0	0	0	0	0	0	NA	NA	NA	NA	NA
TGAAGACATCTCAGAAACATC	F43E2.6	0	0	0	2.45437	3.45176	0	3.24005	2.48472	1.30399	0.192238	NA
TGAAGACATCTCAGAAACATCG	F43E2.6	2.80516	2.02879	0	1.63625	2.58882	1.76285	0.349283	1.59767	0.21862	0.826946	NA
TGAAGACATCTCAGAAACATCGG	F43E2.6	0	7.10078	6.15505	8.18124	7.76645	7.9328	0.793736	0.919156	0.863549	0.387836	NA
TGAAGACATCTCAGAAACATCGGC	F43E2.6	0	0	0	2.45437	0.862939	0	2.41094	3.08932	0.780413	0.435148	NA
TGAAGAGGCAGGGTCCGGTTG	Y57G11C.1145_hairpin	5.61032	7.10078	4.10336	8.18124	5.17763	3.52569	0.00980102	0.895017	0.0109506	0.991263	NA
TGACATCCCTTCTGATCGTGGA	E01G4.7	1.40258	3.04319	4.10336	4.90874	7.76645	4.40711	0.965653	1.0457	0.923452	0.355772	NA
TGACATGGAGATTAGATAACA	Y37E11B.2	0	0	0	0	0.862939	0	0.551839	4.08047	0.135239	0.892423	NA
TGACGACGACGATGGCTGCGGC	Y57G11C.1145_hairpin	0	1.0144	0	1.63625	0	0	0.4359	3.43583	0.126869	0.899044	NA
TGAGAACCCCAAATCTACGGACC	TC5A	0	1.0144	0	0	0	0	-1.37171	4.08047	-0.336165	0.736746	NA
TGAGACATGGTATCGAGATATG	Y37E11B.2	1.40258	0	0	1.63625	6.04057	2.64427	3.07983	1.82469	1.68787	0.0914371	NA
TGAGATGTCGGCGGCCTGATA	PALTA3	0	0	0	0	0	0	NA	NA	NA	NA	NA
TGAGGTGTTGGTGCTGATGGCA	C36A4.14	0	0	0	0.818124	0	0	0.551839	4.08047	0.135239	0.892423	NA
TGAGGTTTTCTGCAGTACACGC	PALTA3	0	0	0	0	0	0	NA	NA	NA	NA	NA
TGAGTGGCGAAAATCGGAAATT	other	0	0	0	0	0	0.881423	0.551839	4.08047	0.135239	0.892423	NA
TGATCTACAAAAAATGCGGGAAC	CELE14B	0	0	0	0	0	0	NA	NA	NA	NA	NA
TGATCTACAAAAAATGCGGGAAT	CELE14B	0	0	0	0	0	0	NA	NA	NA	NA	NA
TGATCTACAAAAAATGCGGGAATT	CELE14B	0	0	0	0	0	0	NA	NA	NA	NA	NA
TGATCTACCTGTTGAACTTGACC	other	0	0	0	0	0	0	NA	NA	NA	NA	NA
TGATCTACCTGTTGAACTTGACT	TIR54TA1	0	0	0	0.818124	1.72588	0	2.02417	3.42124	0.591648	0.554086	NA
TGATCTCTCTTCTCGGCTCTTCG	ChrIII_hairpin1	0	0	0	0	0	0	NA	NA	NA	NA	NA
TGATGCGGTTGTTCCAAAGAATCC	F55A4.9, rncs-1	2.80516	8.11518	8.20673	6.54499	3.45176	6.16996	-0.267935	0.884577	-0.302897	0.761969	NA
TGATGGCGTGGAAGAAGTTGA	Y57G11C.1145_hairpin	4.20774	0	0	0	0	0.881423	-2.14019	2.72884	-0.784286	0.432872	NA
TGATGGCGTGGAAGAAGTTGATG	Y57G11C.1145_hairpin	0	1.0144	0	4.90874	5.17763	0	3.05131	1.97136	1.54782	0.121666	NA
TGATGTGGATGATGGCGTGGAAG	Y57G11C.1145_hairpin	2.80516	0	0	1.63625	1.72588	0	0.368109	2.31173	0.159235	0.873483	NA
TGATTACGTCCCTGCCCTTTGT	F31C3.7, F31C3.8, rrn-1.1, rrn-1.2	0	1.0144	0	0	0.862939	0	-0.409943	3.92172	-0.104531	0.916748	NA
TGCAAATGAAATCGTGGGAGGGG	Unknown_RE7	0	0	0	0	0	0	NA	NA	NA	NA	NA
TGCAAATGAAATCGTGGGCGGG	mir-5550_RE	0	0	0	0	0	1.76285	1.48791	4.03425	0.368819	0.712263	NA
TGCAACTAAGACACCCCGAACT	Y37E3.30	0	0	0	0.818124	0	0.881423	1.44175	4.03525	0.357289	0.720876	NA
TGCACAGACTGAGCATTTTCCCCC	other	0	0	0	0	0.862939	0	0.551839	4.08047	0.135239	0.892423	NA
TGCAGAGAGCCTAAGGAGCATC	other	0	2.02879	6.15505	1.63625	2.58882	1.76285	-0.493348	1.43062	-0.344849	0.730208	NA
TGCCGATGTTTCTGAGATGTCTTC	F43E2.6	7.0129	7.10078	3.07752	4.09062	6.90351	6.16996	0.00665876	0.887391	0.00750376	0.994013	NA
TGCCTCTTCATCAACTTCTTCC	Y57G11C.1145_hairpin	0	0	0	0	0	0.881423	0.551839	4.08047	0.135239	0.892423	NA
TGCGACGGATCAGTGTTGCCACT	T05E12.8	2.80516	1.0144	0	0	2.58882	0.881423	-0.0875397	2.04408	-0.0428261	0.96584	NA
TGCGGAGAAATGACGAGAAAT	other	0	0	0	0	0	0	NA	NA	NA	NA	NA
TGCGGCGAGGATGATGTGGATG	Y57G11C.1145_hairpin	0	0	0	0	0	0	NA	NA	NA	NA	NA
TGCGGCGAGGATGATGTGGATGA	Y57G11C.1145_hairpin	0	0	0	0	0	0	NA	NA	NA	NA	NA
TGCGTCTCTCCCCCTCCCACACT	other	0	0	0	0	0	0	NA	NA	NA	NA	NA
TGCGTGGCGTGTACTGCAGAAAAC	PALTA3	1.40258	3.04319	5.12921	3.27249	6.90351	3.52569	0.484473	1.08877	0.444972	0.65634	NA
TGCTCGTCGATCCAGTTTGGCC	F55A4.9, rncs-1	0	0	0	5.72686	0	0	3.19929	2.77623	1.15239	0.249162	NA
TGCTCGTCGATCCAGTTTGGCCA	F55A4.9, rncs-1	0	0	1.02584	0	1.72588	0.881423	1.09184	2.82428	0.386589	0.69906	NA
TGCTTTCCTCATCTCTGATCT	F55A4.9, rncs-1	0	0	0	0	1.72588	0	1.46127	4.03659	0.362005	0.717348	NA
TGCTTTCCTCATCTCTGATCTT	F55A4.9, rncs-1	1.40258	0	2.05168	0	1.72588	0.881423	-0.401969	2.18154	-0.184259	0.85381	NA
TGCTTTCCTCATCTCTGATCTTTT	F55A4.9, rncs-1	8.41548	16.2304	0	5.72686	5.17763	1.76285	-0.956675	1.03695	-0.922583	0.356224	NA
TGGAAATATGACGGCTGCTACGA	F53H1.4	0	0	0	0	0	0	NA	NA	NA	NA	NA
TGGACAAGTTCAGCGCGCGAACC	F39E9.29_region	0	0	1.02584	0	2.58882	0	1.08399	3.05668	0.35463	0.722867	NA
TGGACCATCCGCAACAGTGATA	F57G8.14, F57G8.15, linc-59	0	0	0	0	0	0	NA	NA	NA	NA	NA
TGGACTTTTTCGCTGGTTTGGTG	F55A4.9, rncs-1	0	4.05759	1.02584	0.818124	1.72588	0.881423	-0.615966	1.80381	-0.341481	0.732741	NA
TGGAGACCCTCACCTACCTGCG	other, Y116A8B.1	0	0	0	0	0	0	NA	NA	NA	NA	NA
TGGAGTTGAATTGGAACGAGATC	T05E12.10	0	2.02879	0	1.63625	1.72588	1.76285	1.26596	2.0455	0.618898	0.535984	NA
TGGATAAGATGATGAAACTAGTC	F55A4.9, rncs-1	7.0129	8.11518	1.02584	6.54499	17.2588	5.28854	0.863219	0.877994	0.983172	0.325523	NA
TGGATGATGGCGTGGAAGAAG	Y57G11C.1145_hairpin	0	0	0	6.54499	0.862939	0	3.57053	2.36583	1.50921	0.131245	NA
TGGATGATGGCGTGGAAGAAGT	Y57G11C.1145_hairpin	0	3.04319	3.07752	2.45437	4.31469	3.52569	0.690024	1.31386	0.525191	0.599451	NA
TGGCCAAACTGGATTGACGAG	F55A4.9, rncs-1	0	0	0	0	0	0	NA	NA	NA	NA	NA
TGGCCAAACTGGATTGACGAGC	F55A4.9, rncs-1	0	0	0	2.45437	4.31469	1.76285	3.76881	2.03228	1.85448	0.0636711	NA
TGGCCAAGCGGACTGGAGCACA	F55A4.9, rncs-1	0	0	0	0	6.04057	0	3.26917	2.73027	1.19738	0.231159	NA
TGGCGTGTACTGCAGAAAACCC	Y105C5A.15	0	1.0144	0	0	0	1.76285	0.523516	3.37754	0.154999	0.876822	NA
TGGCGTGTACTGCAGAAAACCT	PALTA3	0	0	1.02584	0	4.31469	0	1.82134	2.67683	0.68041	0.496245	NA
TGGCTGCGGCGAGGATGATGTG	Y57G11C.1145_hairpin	0	1.0144	1.02584	0	0	0	-2.14412	3.75906	-0.570386	0.568416	NA
TGGGAATGCAGAAGAAAAGAGGG	other	0	0	0	0	0	0	NA	NA	NA	NA	NA
TGGGCGGGGCCAATCCGGAATGC	Y24F12A.3, Y24F12A.4	0	0	0	0	0	0	NA	NA	NA	NA	NA
TGGTCTTTGAGTTTCCGATTTCG	Y17D7C.3	0	0	0	0	0	0	NA	NA	NA	NA	NA
TGGTGGAGCTGGACGATGGATT	F55A4.9, rncs-1	1.40258	1.0144	1.02584	0.818124	0	0.881423	-1.00588	2.23879	-0.449296	0.653218	NA
TGGTTAGGATTCGTGGTTTTCA	tRNA	0	0	0	0	0.862939	0	0.551839	4.08047	0.135239	0.892423	NA
TGTAACAACTCACCTGCCGAAT	F31C3.9, rrn-3.1	0	0	0	1.63625	0	1.76285	2.44171	3.04299	0.802404	0.42232	NA
TGTAATTCTGCAGCCACTTCCGA	W03D2.15	0	0	0	0	0	0	NA	NA	NA	NA	NA
TGTAGATCAAACCGTCATGGG	CELE14B	0	0	0	0	0	0	NA	NA	NA	NA	NA
TGTAGATCACACCGTGATGGGAC	CELE14B	0	0	0	0	0	0	NA	NA	NA	NA	NA
TGTAGTTTGTAGTCTAGCAGACC	TGTAGTTTGTAGTCTAGCAGACC_repeat	0	0	0	0	0	0	NA	NA	NA	NA	NA
TGTCCCATATCGGTTTGATCTCC	dnj-27_element	2.80516	1.0144	4.10336	7.36311	8.62939	1.76285	1.17208	1.10846	1.05739	0.290334	NA
TGTCTTCCTTTTGTTTCTCTTCC	F19B2.5	0	0	0	0	0	1.76285	1.48791	4.03425	0.368819	0.712263	NA
TGTGAACAGCGAGACACTATTCC	Y71A12B.2, Y71A12B.3	0	0	0	0	0	0	NA	NA	NA	NA	NA
TGTGAAGACATCTCAGAAACAT	F43E2.6	0	0	0	0	0	0	NA	NA	NA	NA	NA
TGTGAAGACATCTCAGAAACATC	F43E2.6	0	0	0	0.818124	2.58882	0.881423	2.77532	2.60438	1.06563	0.286589	NA
TGTGAAGACATCTCAGAAACATCG	F43E2.6	0	0	0	0	0	0	NA	NA	NA	NA	NA
TGTGCTGAGCTCTTGGATGATC	puf-10, Y48G1BL.3	0	0	2.05168	1.63625	0	0	-0.348031	3.03903	-0.114521	0.908825	NA
TGTGGATGATGGCGTGGAAGA	Y57G11C.1145_hairpin	2.80516	2.02879	3.07752	2.45437	3.45176	0.881423	-0.21486	1.32819	-0.161769	0.871488	NA
TGTGGATGATGGCGTGGAAGAA	Y57G11C.1145_hairpin	1.40258	0	0	0	0.862939	0	-0.409945	3.65403	-0.11219	0.910673	NA
TGTGGATGATGGCGTGGAAGAAG	Y57G11C.1145_hairpin	1.40258	4.05759	4.10336	4.90874	2.58882	2.64427	0.0588321	1.15748	0.0508279	0.959463	NA
TGTGGCCCGCGGTAATTACATCC	F41F3.10	0	0	0	4.90874	0.862939	0	3.21046	2.55127	1.25838	0.208256	NA
TGTGGGCCCTCGCACTGTCTACC	E01G4.5	0	1.0144	1.02584	0.818124	0	0	-1.19137	3.10742	-0.383395	0.701427	NA
TGTGGGCGGGGCCAATCCGGAA	H15N14.4, H37A05.4, Y24F12A.3, Y24F12A.4	0	0	0	0	0	0	NA	NA	NA	NA	NA
TGTGGGCGGGGCCAATCCGGAAT	H15N14.4, Y24F12A.3, Y24F12A.4	0	0	0	0	0	0	NA	NA	NA	NA	NA
TGTGTTCGTCCTCCATACATTG	C36A4.14	0	0	0	0	0	0	NA	NA	NA	NA	NA
TGTTCCCTGTGGAGACCCTCACC	other, Y116A8B.1	4.20774	0	4.10336	0.818124	6.90351	0.881423	0.0710545	1.42138	0.0499898	0.960131	NA
TGTTCGTCCTCCATACATTGCC	C36A4.14	0	2.02879	1.02584	1.63625	2.58882	0	0.418127	2.00814	0.208215	0.835061	NA
TGTTCTGCTCTCTCTTTCAGC	F55A4.9, rncs-1	0	0	0	0.818124	0	0	0.551839	4.08047	0.135239	0.892423	NA
TGTTCTGCTCTCTCTTTCAGCT	F55A4.9, rncs-1	0	0	0	0	0	0	NA	NA	NA	NA	NA
TGTTTCTGAGATGTCTTCACA	F43E2.6	0	0	0	0	0	0	NA	NA	NA	NA	NA
TGTTTCTGAGATGTCTTCACAAT	F43E2.6	0	0	0	0	0	0.881423	0.551839	4.08047	0.135239	0.892423	NA
TGTTTTACACCGGATTGCCAGT	Y116F11A.1	0	0	0	0.818124	0	0	0.551839	4.08047	0.135239	0.892423	NA
TTAAACACAGCGGCGCGCGGAAC	other	0	0	0	0	0	0	NA	NA	NA	NA	NA
TTAAACATAGCGGCGCGCGGA	PALTA3	0	3.04319	0	7.36311	0	5.28854	1.98889	1.67203	1.1895	0.234241	NA
TTAAACATAGCGGCGCGCGGAA	PALTA3	0	0	0	1.63625	0	0	1.39447	4.04264	0.34494	0.730139	NA
TTAAACATAGCGGCGCGCGGAAC	PALTA3	1.40258	2.02879	7.18089	8.18124	6.90351	13.2213	1.37542	0.912259	1.50771	0.131628	NA
TTAAACGCAGCGGCGCGCGGAAC	PALTA3	0	0	6.15505	1.63625	3.45176	5.28854	0.703692	1.46109	0.481621	0.630075	NA
TTAAAGTTGATGGACGGCGAGATT	PALTTAA1	2.80516	0	0	0	0	0	-2.52931	3.62414	-0.697905	0.485237	NA
TTACAGTACTCCTGAAAGGCACA	B0303.7	0	0	0	0	0	0	NA	NA	NA	NA	NA
TTACCTATCGGCTTTAAATGT	PALTTAA3	0	0	0	0	0	0	NA	NA	NA	NA	NA
TTAGAGAGTGACAGACATCCGGG	Unknown_RE2	0	0	0	0	0	0	NA	NA	NA	NA	NA
TTAGATACCGTACCCCGAAAAC	ChrIII_hairpin2	0	0	0	0	0	0	NA	NA	NA	NA	NA
TTAGATACCGTACCCCGAAAACT	ChrIII_hairpin2	1.40258	1.0144	0	0	0	0	-2.34001	3.52391	-0.664037	0.506666	NA
TTAGGATTCGTGGTTTTCACCC	tRNA	1.40258	7.10078	3.07752	9.81748	6.90351	8.81423	1.09939	0.898467	1.22363	0.221093	NA
TTAGGTTTTCTGCAGTACACGC	PALTA3	0	0	0	0	0.862939	2.64427	2.48148	3.02987	0.819006	0.412783	NA
TTATCATTGCCCGTCGCCTTTA	C02B8.2, F31A9.4, fbxc-37, fbxc-38	0	7.10078	9.23257	6.54499	9.49233	13.2213	0.787393	0.863199	0.912179	0.361674	NA
TTATCTAATCTCCATGTCACCC	Y37E11B.2	0	0	0	0.818124	0	0	0.551839	4.08047	0.135239	0.892423	NA
TTCAAACATTCGGCAATGGGGTA	Y37E3.30	0	0	0	4.90874	0	2.64427	3.59561	2.296	1.56603	0.117342	NA
TTCACGGCGGCCGACAATTTCC	other	0	0	0	3.27249	0	0	2.39242	3.39485	0.70472	0.480984	NA
TTCATTCACATCGGCTGCCATCC	T05E12.8	0	2.02879	7.18089	2.45437	1.72588	7.9328	0.346541	1.24956	0.277329	0.781527	NA
TTCATTCTGCCCTCGCACACACC	T25G12.8	0	0	0	0	0	0	NA	NA	NA	NA	NA
TTCCACGCCATCATCCACATC	Y57G11C.1145_hairpin	0	0	0	0	3.45176	0.881423	2.78876	2.80927	0.992702	0.320855	NA
TTCCACGGCGGCCGACAATTTCC	Unknown_hairpin_RE2	0	0	0	0	2.58882	0	2.0466	3.7245	0.549497	0.582665	NA
TTCCCGCATTTTTTGTAGATC	CELE14B	2.80516	2.02879	0	1.63625	0	0	-1.51593	2.28876	-0.662337	0.507755	NA
TTCCCGCATTTTTTGTAGATCA	CELE14B	0	0	0	0	3.45176	4.40711	3.64649	2.26467	1.61016	0.107362	NA
TTCCCTTTATGTCGCACTTGCG	T05E12.10	0	0	1.02584	0	0	0	-1.37171	4.08047	-0.336165	0.736746	NA
TTCCCTTTATGTCGCACTTGCGC	T05E12.10	0	0	0	0	0	0	NA	NA	NA	NA	NA
TTCCGCGCGCCGCTATGTTTA	PALTA3	0	0	0	0	0	0	NA	NA	NA	NA	NA
TTCCGCGCGCCGCTATGTTTAAC	PALTA3	0	0	1.02584	0	0	0	-1.37171	4.08047	-0.336165	0.736746	NA
TTCCGCGCGCCGCTATGTTTAACT	PALTA3	0	0	0	0	2.58882	0	2.0466	3.7245	0.549497	0.582665	NA
TTCCTCATCTCTGATCTTTTCC	F55A4.9, rncs-1	5.61032	2.02879	0	0.818124	1.72588	7.05138	0.380534	1.40383	0.27107	0.786338	NA
TTCCTCATCTCTGATCTTTTCCA	F55A4.9, rncs-1	4.20774	3.04319	0	0	1.72588	0	-2.0555	2.04706	-1.00412	0.315319	NA
TTCCTCGTTTGGATATGTAGAAGA	Y17D7C.3	0	4.05759	2.05168	2.45437	1.72588	5.28854	0.573599	1.37134	0.418276	0.675745	NA
TTCGAGACTCGTCAGATCTGC	K02E2.6	0	0	0	2.45437	3.45176	0	3.24005	2.48472	1.30399	0.192238	NA
TTCGAGACTCGTCAGATCTGCA	K02E2.6	0	1.0144	0	5.72686	6.90351	2.64427	3.64842	1.66391	2.19267	0.028331	NA
TTCGAGACTCGTCAGATCTGCAT	K02E2.6	0	0	1.02584	0	0	0	-1.37171	4.08047	-0.336165	0.736746	NA
TTCGCGTAGATCACATGTAGATC	pcp-4, Unknown_RE8, Y116F11B.3, Y15E3A.3, Y6B3B.7, Y6B3B.9	1.40258	2.02879	3.07752	7.36311	6.90351	10.5771	1.90294	1.00856	1.88679	0.0591883	NA
TTCGCTCTCGATTCCGCATGCCG	dnj-27_element	0	0	0	0	0	0	NA	NA	NA	NA	NA
TTCGCTCTCGATTTCGCATGCCG	dnj-27_element	0	1.0144	2.05168	4.90874	1.72588	4.40711	1.77446	1.50376	1.18001	0.237995	NA
TTCGGACAGATGTGACACGGA	PALTTAA3	0	1.0144	0	0	0	0	-1.37171	4.08047	-0.336165	0.736746	NA
TTCGGCAATGGGGTACCCTACG	Y37E3.30	0	0	0	0	0	0.881423	0.551839	4.08047	0.135239	0.892423	NA
TTCGTTCTTGGTGAAAAAAGTG	E01G4.7	0	5.07199	1.02584	0.818124	7.76645	6.16996	1.21172	1.31202	0.923553	0.355719	NA
TTCTAAGTCCCTTTGATGCTC	K06B9.6	0	0	0	0	0	0	NA	NA	NA	NA	NA
TTCTACAAAAGGGACGCCGGAAA	mtd-1, other, ZK337.5	0	0	0	0	0	0	NA	NA	NA	NA	NA
TTCTACAGAAGGGACGCCGGAAA	other	0	0	0	0	0	0	NA	NA	NA	NA	NA
TTCTACATATCCAAACGAGGAAC	Y17D7C.3	0	0	0	0	0	0	NA	NA	NA	NA	NA
TTCTACATATCCAAACGAGGAACC	Y17D7C.3	1.40258	0	2.05168	0.818124	0.862939	1.76285	0.00538263	1.95832	0.00274859	0.997807	NA
TTCTACATATCCAACGGAGGAAC	Y17D7C.3	0	0	0	6.54499	6.04057	4.40711	4.76361	1.65745	2.87407	0.00405222	NA
TTCTCTCGTAGAACGTGTCGCT	F55A4.9, rncs-1	7.0129	8.11518	3.07752	8.18124	2.58882	8.81423	0.113091	0.881486	0.128296	0.897915	NA
TTCTGAGATGTCTTCACAATTCT	F43E2.6	4.20774	5.07199	4.10336	8.18124	4.31469	11.4585	0.835215	0.87348	0.956192	0.338975	NA
TTCTGTCATCACCCGCGGGGC	dnj-27_element	0	0	0	0	0	0	NA	NA	NA	NA	NA
TTCTGTGGGCGGGGCCAATCCC	DNA-8-1	0	0	0	0	0	4.40711	2.81119	3.04374	0.9236	0.355695	NA
TTCTTACTGTAGTCTTCGCTAAG	fbxa-16, other, Y73B3A.14	0	1.0144	1.02584	0.818124	2.58882	0.881423	1.00344	2.07107	0.484506	0.628027	NA
TTCTTACTGTAGTTTTCGCTAAG	PALTA4	0	0	0	0	0	0	NA	NA	NA	NA	NA
TTGAAGAATTTGAGTGAGGCTGA	M4.2, puf-4	0	0	0	0	0	0	NA	NA	NA	NA	NA
TTGATCTCTATGCGACCCCACA	T05E12.10	7.0129	0	1.02584	0	2.58882	0	-1.59296	1.945	-0.819	0.412786	NA
TTGATCTCTATGCGACCCCACAC	T05E12.10	0	0	0	0	0	0	NA	NA	NA	NA	NA
TTGATTGTGTCGGAAAAAGAAA	K02E2.6	0	4.05759	0	3.27249	5.17763	1.76285	1.2684	1.54289	0.822096	0.411022	NA
TTGCCGATGTTTCTGAGATGT	F43E2.6	4.20774	2.02879	5.12921	15.5443	0.862939	2.64427	0.758514	1.10245	0.688028	0.491435	NA
TTGCCGATGTTTCTGAGATGTCTT	F43E2.6	2.80516	4.05759	4.10336	9.81748	8.62939	9.69565	1.34286	0.856792	1.56731	0.117043	NA
TTGCCTCTGAATGCCGAGTAGG	other	0	0	0	0	0	0	NA	NA	NA	NA	NA
TTGCCTCTGAATGCCGAGTAGGC	gopc-1, other, ZK849.2	0	1.0144	0	0	0.862939	0	-0.409943	3.92172	-0.104531	0.916748	NA
TTGCCTCTGAATGCCGAGTAGT	IR1_CE	5.61032	0	4.10336	4.09062	7.76645	2.64427	0.618971	1.15482	0.535991	0.591965	NA
TTGCTTAACTTGCCAGATCGGAC	rrn-4_RE	0	0	0	0	0	0	NA	NA	NA	NA	NA
TTGCTTTCCTCATCTCTGATCT	F55A4.9, rncs-1	4.20774	1.0144	0	0	0	0	-3.43581	2.64348	-1.29973	0.193695	NA
TTGCTTTCCTCATCTCTGATCTT	F55A4.9, rncs-1	2.80516	1.0144	0	0.818124	4.31469	0	0.487438	1.91453	0.2546	0.799032	NA
TTGCTTTCCTCATCTCTGATCTTT	F55A4.9, rncs-1	1.40258	13.1872	5.12921	5.72686	4.31469	4.40711	-0.480168	0.944605	-0.508327	0.611224	NA
TTGCTTTTTGATCCTTCGATGT	F31C3.10, F31C3.9, rrn-3.1, rrn-3.56	0	0	0	0	0	0.881423	0.551839	4.08047	0.135239	0.892423	NA
TTGGAATCCGCTTAACAATTGG	Y105C5A.1272, Y105C5A.14	0	1.0144	0	1.63625	0.862939	0	1.04213	2.85462	0.365068	0.715061	NA
TTGGACTTTTTCGCTGGTTTGGT	F55A4.9, rncs-1	2.80516	7.10078	1.02584	0	0	3.52569	-1.65684	1.5982	-1.03669	0.299881	NA
TTGGCCAAACTGGATTGACGAGC	F55A4.9, rncs-1	1.40258	4.05759	0	3.27249	11.2182	6.16996	1.89793	1.18425	1.60264	0.109013	NA
TTGGCCAAGCGGACTGGAGCACA	F55A4.9, rncs-1	2.80516	1.0144	1.02584	0	1.72588	0.881423	-0.869834	1.91811	-0.453486	0.650199	NA
TTGGTGGGCCCTAGACGATTTTG	MTCE.11, nduo-1	0	0	0	0	0	0	NA	NA	NA	NA	NA
TTGGTTGGTCCCCGAATTTTGCC	PALTA3	0	0	2.05168	0.818124	0	9.69565	2.28636	1.93923	1.179	0.238397	NA
TTGTCTTCCTTTTGTTTCTCTTC	F19B2.5	0	0	0	0	0	0	NA	NA	NA	NA	NA
TTGTGAAGACATCTCAGAAACA	F43E2.6	2.80516	1.0144	5.12921	7.36311	2.58882	4.40711	0.683305	1.11578	0.612402	0.540272	NA
TTGTGTTCGTCCTCCATACATTG	C36A4.14	0	0	0	0	0	0	NA	NA	NA	NA	NA
TTTAAAGTCGTAGAAGTGGGAAA	NPALTA1	0	0	0	0	0	0	NA	NA	NA	NA	NA
TTTAGTGACTCTGGCCGTTCACC	TTTAGTGACTCTGGCCGTTCACC_repeat	0	1.0144	0	1.63625	0	0.881423	1.05064	2.84984	0.368666	0.712377	NA
TTTCAACACGGCGGGAGGAAAGC	Y37E3.30	0	0	0	0	0	0	NA	NA	NA	NA	NA
TTTCACGGCGGCCGACAATTTCC	other	0	0	0	0	0	0	NA	NA	NA	NA	NA
TTTCCAATGTGCTCCAGTCCGCT	F55A4.9, rncs-1	1.40258	0	3.07752	0	0	0	-3.25005	2.77517	-1.17112	0.241551	NA
TTTCCTCATCTCTGATCTTTTC	F55A4.9, rncs-1	0	1.0144	2.05168	1.63625	1.72588	3.52569	1.09932	1.68501	0.652412	0.514135	NA
TTTCCTCATCTCTGATCTTTTCC	F55A4.9, rncs-1	2.80516	10.144	0	5.72686	5.17763	16.747	1.07232	0.997648	1.07485	0.282441	NA
TTTCCTCATCTCTGATCTTTTCCA	F55A4.9, rncs-1	2.80516	8.11518	1.02584	0.818124	1.72588	0.881423	-1.81609	1.42404	-1.27531	0.2022	NA
TTTCGAAACCGTGCGGCAGTTG	DNA-8-1	0	0	0	0	0	0.881423	0.551839	4.08047	0.135239	0.892423	NA
TTTCGAAACCGTGCGGCAGTTGC	DNA-8-1	1.40258	0	0	0	2.58882	0.881423	1.50496	2.5582	0.58829	0.556338	NA
TTTCGGACAGATGTGACACGGA	other	0	0	0	1.63625	1.72588	0	2.42798	3.05469	0.794838	0.426707	NA
TTTCGGGGTACGGTATCTAAT	ChrIII_hairpin2	0	0	0	0	0	0	NA	NA	NA	NA	NA
TTTCGGGGTACGGTATCTAATA	ChrIII_hairpin2	0	0	0	0	0	0.881423	0.551839	4.08047	0.135239	0.892423	NA
TTTCGGGGTACGGTATCTAATAG	ChrIII_hairpin2	0	0	1.02584	0	0	0	-1.37171	4.08047	-0.336165	0.736746	NA
TTTCGTCCATACATTGAGGGAGC	F39E9.10	0	0	0	0	0	0	NA	NA	NA	NA	NA
TTTCGTCCATACATTGAGGGAGCC	F39E9.10	0	0	2.05168	0	0	0	-2.14696	4.04968	-0.530155	0.596004	NA
TTTCGTTCTTGGTGAAAAAAGTG	E01G4.7	0	1.0144	0	0	1.72588	0	0.498641	3.39419	0.14691	0.883203	NA
TTTCTCTTCCTCTTGCTTCTGT	F19B2.5	0	0	0	0	0	0	NA	NA	NA	NA	NA
TTTCTCTTCCTCTTGCTTCTGTT	F19B2.5	0	0	0	0	0	0	NA	NA	NA	NA	NA
TTTCTGAGATGTCTTCACAAT	F43E2.6	0	0	0	0	0	0	NA	NA	NA	NA	NA
TTTCTGAGATGTCTTCACAATT	F43E2.6	0	0	0	6.54499	0.862939	0.881423	3.73236	2.13944	1.74455	0.0810624	NA
TTTCTGAGATGTCTTCACAATTCT	F43E2.6	0	0	2.05168	0.818124	0	0.881423	-0.311214	2.81732	-0.110465	0.912041	NA
TTTCTGCAGTACACGCCACGC	PALTA3	0	0	0	0	0	0	NA	NA	NA	NA	NA
TTTCTGTCATCACCCGCGGGGC	dnj-27_element	2.80516	0	0	0	0.862939	0	-1.54787	3.06206	-0.505499	0.613208	NA
TTTCTGTCATCACCCGCGGGGCC	dnj-27_element	0	0	0	0	0	0	NA	NA	NA	NA	NA
TTTCTGTCATCACCCGCGGGGCT	other	0	1.0144	0	0	0.862939	0	-0.409943	3.92172	-0.104531	0.916748	NA
TTTGATACCTGGACTCTTTCC	E01G4.7	0	0	0	0	0	0	NA	NA	NA	NA	NA
TTTGATCTACAAAAAATGCGGG	CELE14B	0	0	0	0	1.72588	0.881423	2.0552	3.39038	0.606185	0.544392	NA
TTTGATCTACCTGTTGAACTTG	TIR54TA1	0	0	0	0	0	0.881423	0.551839	4.08047	0.135239	0.892423	NA
TTTGATCTACCTGTTGAACTTGA	other	0	0	0	0	0	0	NA	NA	NA	NA	NA
TTTGATCTACGAAAAATGCGGGA	CELE14B	1.40258	0	0	0	0	0	-1.37171	4.08047	-0.336165	0.736746	NA
TTTGGAACAGAAGCAAGAGGA	F19B2.5	0	0	0	0	0.862939	0	0.551839	4.08047	0.135239	0.892423	NA
TTTGGCAGCCCCCGACACTTTCG	F39D8.3	0	0	0	0	0	0	NA	NA	NA	NA	NA
TTTGGCCAAGCGGACTGGAGC	F55A4.9, rncs-1	0	0	4.10336	1.63625	0.862939	0.881423	-0.316397	2.00789	-0.157577	0.87479	NA
TTTGGCCAAGCGGACTGGAGCA	F55A4.9, rncs-1	1.40258	0	1.02584	5.72686	0	0.881423	1.5029	1.98586	0.756802	0.449169	NA
TTTGGCCAAGCGGACTGGAGCAC	F55A4.9, rncs-1	9.81807	7.10078	0	2.45437	0.862939	0.881423	-1.9796	1.33666	-1.48101	0.138603	NA
TTTGGCCAAGCGGACTGGAGCACA	F55A4.9, rncs-1	2.80516	2.02879	4.10336	11.4537	4.31469	1.76285	0.975438	1.08745	0.896993	0.369723	NA
TTTGGGGGGCAGAAATCGGAAA	PAL8C	0	0	0	0	0	0	NA	NA	NA	NA	NA
TTTGTTTCTCTTCCTCTTGCTTC	F19B2.5	0	0	0	0	0	0	NA	NA	NA	NA	NA
TTTTAAAACCGTGCGGCAGTTGC	DNA-8-1	0	0	0	0	0	0	NA	NA	NA	NA	NA
TTTTCCCATCCAACTGACTGA	W04B5.8	0	0	0	0.818124	3.45176	0	2.77002	2.82269	0.98134	0.326425	NA
TTTTCGGGGTACGGTATCTAAT	ChrIII_hairpin2	2.80516	3.04319	2.05168	4.90874	2.58882	1.76285	0.237821	1.23421	0.192691	0.847201	NA
TTTTCGGGGTACGGTATCTAATA	ChrIII_hairpin2	1.40258	0	1.02584	0	3.45176	3.52569	1.57119	1.91402	0.820888	0.41171	NA
TTTTCTGCAGTACACGCCACGC	PALTA3	0	0	0	2.45437	0	0.881423	2.41792	3.08334	0.784186	0.432931	NA
TTTTGAAAGTTCTACCGTTCTC	F34D6.11, linc-12	0	0	0	0	0	0	NA	NA	NA	NA	NA
TTTTGATCTACCTGTTGAACTTG	TIR54TA1	0	0	0	0	0	0	NA	NA	NA	NA	NA
TTTTGCCTTTTCCCCGTGAGT	PALTA3	0	0	0	0	0	0	NA	NA	NA	NA	NA
TTTTGGACCGAGTTGCCGTGACT	PALNN1	0	0	0	0	0	0	NA	NA	NA	NA	NA
TTTTGGGGGGCAGAAATCGGA	PAL8C	0	0	6.15505	0	0	0	-3.72591	2.69582	-1.3821	0.16694	NA
TTTTGGGGGGCAGAAATCGGAA	PAL8C	1.40258	1.0144	0	0	0.862939	0	-1.37008	2.96557	-0.461996	0.644084	NA
TTTTGGGGGGCAGAAATCGGAAA	PAL8C	0	2.02879	0	0	0	0	-2.13597	4.05034	-0.527355	0.597947	NA
TTTTGTTTCTCTTCCTCTTGCT	F19B2.5	0	1.0144	4.10336	0	0.862939	0	-2.50832	2.39341	-1.04801	0.294635	NA
TTTTGTTTCTCTTCCTCTTGCTT	F19B2.5	0	1.0144	0	0	0	0	-1.37171	4.08047	-0.336165	0.736746	NA
TTTTGTTTCTCTTCCTCTTGCTTC	F19B2.5	0	0	0	0	0	0	NA	NA	NA	NA	NA
TTTTTCAGCGGTCTCGTTATG	PAL5A	0	0	0	0	0	0	NA	NA	NA	NA	NA
TTTTTCAGCGGTCTCGTTATGA	PAL5A	0	0	0	5.72686	1.72588	0	3.5785	2.32236	1.54089	0.123344	NA
TTTTTGATTCAAAAACTCGGAT	mdt-8, Y62F5A.1	0	0	2.05168	0	0	0	-2.14696	4.04968	-0.530155	0.596004	NA
TTTTTGCTGATCTCTCTTCTCGG	ChrIII_hairpin1	0	0	1.02584	0.818124	2.58882	7.9328	3.21287	1.84379	1.74253	0.0814149	NA
