# Supplementary material for: A low-abundance class of Dicer-dependent siRNAs produced from a variety of features in C. elegans
Source: HighWire-hosted journal article supplement (doi:10.1101/gr.279083.124), 2024-12-01
Supplement: Supplemental_Table_S3.xlsx [file Supplemental_Table_S3.xlsx]

## Sheet: Table S3
Supplemental Table S3. Dicer interaction with 23H-RNA loci in DCR-1 PAR-CLIP data.
23H-RNA locus	DCR-1 binding in PAR-CLIP	Crosslink reads in DCR-1 PAR-CLIP
rncs-1	TRUE	710
F43E2.6	TRUE	582
C36A4.14	TRUE	37
ChrIII_unknown_hairpin1	TRUE	26
rrn-4.15	TRUE	26
Y17D7C.3	TRUE	24
mir-5592	TRUE	20
F39E9.7	TRUE	13
Y116F11A.1	TRUE	13
K02E2.6	TRUE	12
TC5A	TRUE	9
Y59H11AR.6	TRUE	9
Y37E3.30	TRUE	8
Y57G11C.1145, Y57G11C.57	TRUE	6
Y37E11B.2	TRUE	6
E01G4.7	TRUE	5
W03D2.15	TRUE	5
Y116A8B.1	TRUE	5
F55C9.3	TRUE	4
CELE14B	TRUE	4
PALTA3	TRUE	4
PAL5A, Y69A2AR.16	TRUE	3
F19B2.5	TRUE	3
T05E12.8	TRUE	2
ChrX_intergenic1	TRUE	2
rrn-2.1	FALSE	NA
rrn-1.1, rrn-1.2	FALSE	NA
rrn-3.1, rrn-3.56	FALSE	NA
rrn-3.1	FALSE	NA
F52G3.8	FALSE	NA
dnj-27	FALSE	NA
jmjc-1	FALSE	NA
Y24F12A.3	FALSE	NA
Y24F12A.3	FALSE	NA
H15N14.4	FALSE	NA
puf-4	FALSE	NA
T05E12.10	FALSE	NA
PAL8C	FALSE	NA
PALTA4	FALSE	NA
DNA-8-1	FALSE	NA
Unknown_RE2	FALSE	NA
Y116A8C.27	FALSE	NA
H37A05.4	FALSE	NA
Unknown_hairpin_RE2	FALSE	NA
E01G4.5	FALSE	NA
ChrIII_hairpin2	FALSE	NA
