# Supplementary material for: A low-abundance class of Dicer-dependent siRNAs produced from a variety of features in C. elegans
Source: HighWire-hosted journal article supplement (doi:10.1101/gr.279083.124), 2024-12-01
Supplement: Supplemental_Table_S4.xlsx [file Supplemental_Table_S4.xlsx]

## Sheet: TableS4
Supplemental Table S4. Geometric mean-normalized sRNA-seq read counts and statistical analysis for gravid adults treated with control (L4440) or dcr-1 RNAi.
Feature ID	Classifier	Feature Name	L4440 RNAi rep 1	L4440 RNAi rep 2	dcr-1 RNAi rep 1	dcr-1 RNAi rep 2	log2 fold change	lfc SE	stat	p-value	adjusted p-value
WBGene00000939	dcr-1 22G-RNAs	dcr-1, K12H4.8	1452.66	1759.05	362967	382381	7.86	0.08	98.45	0	0
WBGene00000939	dcr-1 sense siRNAs	dcr-1, K12H4.8	111.1	98.82	16012.2	17592.6	7.32	0.13	55.39	0	0
MIMAT0015100	miRNA	miR-58a-5p	1794.32	1632.33	5806.36	5664.51	1.74	0.09	19.97	9.92e-89	3.11e-85
MIMAT0000054	miRNA	miR-81-3p	233044	217296	96968.6	102508	-1.17	0.06	-18.65	1.37e-77	2.86e-74
MIMAT0020770	miRNA	miR-41-5p	9286.98	10347.4	23798.6	25824.8	1.34	0.07	17.87	1.89e-71	2.97e-68
MIMAT0000302	miRNA	miR-246-3p	9369.41	8220.92	2387.95	2890.88	-1.74	0.1	-17.47	2.44e-68	3.07e-65
MIMAT0000036	miRNA	miR-64-5p	85530.1	85519.2	35067.2	39593.5	-1.2	0.07	-17.37	1.39e-67	1.45e-64
MIMAT0000055	miRNA	miR-82-3p	306998	290196	138161	147814	-1.06	0.06	-16.97	1.46e-64	1.31e-61
MIMAT0000042	miRNA	miR-70-3p	419096	385793	193706	213699	-0.98	0.07	-14.26	3.85e-46	3.02e-43
TTTGCCGATGTTTCTGAGATGTC	23H-RNA	F43E2.6	2055.94	2212.48	651.91	739.96	-1.62	0.12	-13.49	1.68e-41	1.17e-38
MIMAT0000038	miRNA	miR-66-5p	89696.9	86876	48247.1	51506.8	-0.82	0.06	-13.38	7.49e-41	4.7e-38
MIMAT0000030	miRNA	miR-58a-3p	340738	309075	186048	193216	-0.78	0.07	-11.93	7.81e-33	4.45e-30
MIMAT0000037	miRNA	miR-65-5p	183344	170508	93045.6	107134	-0.82	0.07	-11.05	2.1e-28	1.1e-25
MIMAT0000285	miRNA	miR-230-3p	3098.85	2522.9	992.53	1169.56	-1.38	0.13	-11	3.62e-28	1.74e-25
MIMAT0004221	miRNA	miR-786-3p	4893.17	3987.8	2055.91	2026.77	-1.12	0.1	-10.73	7.01e-27	3.14e-24
MIMAT0004220	miRNA	miR-785-3p	740.67	682.46	191.78	197.06	-1.87	0.18	-10.13	3.88e-24	1.62e-21
MIMAT0032017	miRNA	miR-789-2-5p	915.08	774.31	264.77	216.77	-1.81	0.18	-9.83	8.41e-23	3.3e-20
MIMAT0000006	miRNA	miR-35-3p	453556	510499	269247	307854	-0.74	0.08	-9.55	1.28e-21	4.73e-19
MIMAT0000291	miRNA	miR-236-3p	2088.2	1695.11	798.61	822.73	-1.22	0.13	-9.41	4.86e-21	1.69e-18
TTTGCCGATGTTTCTGAGATGT	23H-RNA	F43E2.6	1138.47	1040.55	404.31	433.53	-1.38	0.15	-9.33	1.02e-20	3.37e-18
WBGene00006780	WAGO Class 22G	B0350.2, unc-44	614.04	702.23	188.92	194.1	-1.78	0.19	-9.26	2.01e-20	6.01e-18
WBGene00006780	ERGO Class 26G	B0350.2, unc-44	0	0	2.86	0	-1.78	0.19	-9.26	2.01e-20	6.01e-18
CATCTCAGAAACATCGGCAAATG	23H-RNA	F43E2.6	599.7	770.82	198.94	151.74	-1.96	0.21	-9.15	5.81e-20	1.66e-17
MIMAT0000035	miRNA	miR-63-3p	8997.89	8075.59	4624.91	5244.77	-0.79	0.09	-9.12	7.56e-20	2.06e-17
WBGene00194794	WAGO Class 22G	F45B8.5	358.39	361.58	70.13	65.03	-2.41	0.27	-9.03	1.71e-19	4.46e-17
MIMAT0000049	miRNA	miR-77-3p	65038.8	71325.9	40068.5	45504.3	-0.67	0.08	-8.96	3.24e-19	8.12e-17
WBGene00195186	WAGO Class 22G	F19G12.10	3128.71	2994.92	1487.01	1733.15	-0.93	0.1	-8.89	5.95e-19	1.44e-16
MIMAT0000292	miRNA	miR-237-5p	45221.2	40142	27527.6	28070.3	-0.62	0.07	-8.85	8.71e-19	2.02e-16
MIMAT0000002	miRNA	lin-4-5p	15029.5	12207.6	7696.97	8028.26	-0.79	0.09	-8.75	2.09e-18	4.67e-16
MIMAT0000299	miRNA	miR-243-3p	1607.96	1378.87	546.72	693.65	-1.27	0.15	-8.54	1.39e-17	3e-15
MIMAT0000015	miRNA	miR-44-3p	53934.8	56953.5	36242.9	39733.4	-0.55	0.07	-8.13	4.17e-16	8.43e-14
MIMAT0000016	miRNA	miR-45-3p	53934.8	56953.5	36242.9	39733.4	-0.55	0.07	-8.13	4.17e-16	8.43e-14
MIMAT0000284	miRNA	miR-229-5p	1936.48	1848.57	1011.86	771.49	-1.08	0.14	-7.93	2.16e-15	4.24e-13
MIMAT0000058	miRNA	miR-85-3p	11865	9621.89	6609.26	6406.45	-0.72	0.09	-7.85	4.3e-15	8.18e-13
MIMAT0000021	miRNA	miR-50-5p	16698.4	16533.7	10107.8	11704.4	-0.61	0.08	-7.81	5.73e-15	1.06e-12
MIMAT0000701	miRNA	miR-359	2904.12	2326.41	1386.11	1395.19	-0.91	0.12	-7.71	1.23e-14	2.21e-12
WBGene00047543	piRNA	21ur-5107, Y73F8A.203	10160.2	8644.12	5378.44	6282.3	-0.69	0.1	-7.24	4.48e-13	7.81e-11
MIMAT0000045	miRNA	miR-73-3p	69603.4	73710.4	44234.7	53031	-0.56	0.08	-6.93	4.17e-12	7.07e-10
WBGene00019174	WAGO Class 22G	H09G03.1	1642.6	1575.36	822.22	959.69	-0.85	0.13	-6.81	9.46e-12	1.55e-09
WBGene00007672	WAGO Class 22G	C18D4.2, fbxa-136	1228.07	1113.79	579.63	635.52	-0.95	0.14	-6.81	9.67e-12	1.55e-09
MIMAT0000007	miRNA	miR-36-3p	24486.2	25783.5	18646.3	18807.5	-0.42	0.06	-6.8	1.05e-11	1.64e-09
WBGene00166498	piRNA	21ur-5832, Y105C5A.624	1839.72	1799.74	1084.85	1108.47	-0.73	0.11	-6.67	2.6e-11	3.98e-09
WBGene00018204	WAGO Class 22G	F39F10.4	1721.45	2095.05	990.39	1122.26	-0.85	0.13	-6.63	3.28e-11	4.78e-09
WBGene00018204	ERGO Class 26G	F39F10.4	63.31	104.64	17.89	34.49	-0.85	0.13	-6.63	3.28e-11	4.78e-09
MIMAT0015112	miRNA	miR-229-3p	2196.91	2127.6	1244.43	1405.04	-0.71	0.11	-6.48	8.93e-11	1.27e-08
WBGene00050168	piRNA	21ur-4411, Y57G11C.428	2057.14	1802.07	1158.55	1189.26	-0.72	0.11	-6.26	3.81e-10	5.3e-08
MIMAT0000017	miRNA	miR-46-3p	11596.2	11070.5	8217.93	8596.78	-0.43	0.07	-6.24	4.29e-10	5.85e-08
WBGene00046939	piRNA	21ur-4834, Y105C5A.163	1569.73	1381.2	767.84	893.67	-0.83	0.13	-6.22	4.97e-10	6.63e-08
MIMAT0000031	miRNA	miR-59-3p	21445.8	16289.5	7122.35	8012.49	-1.32	0.21	-6.16	7.49e-10	9.64e-08
WBGene00013499	WAGO Class 22G	Y70G10A.3	2443	2599.63	3598.74	3748.1	0.54	0.09	6.15	7.53e-10	9.64e-08
MIMAT0000061	miRNA	miR-90-3p	28571.8	27417	21744.9	21656	-0.37	0.06	-6.03	1.65e-09	2.07e-07
MIMAT0000010	miRNA	miR-39-3p	213178	228156	159101	174943	-0.4	0.07	-5.99	2.14e-09	2.63e-07
WBGene00018394	23H target 22G	F43E2.6	436.04	356.93	120.94	162.58	-1.49	0.25	-5.93	2.95e-09	3.56e-07
TTTGCCGATGTTTCTGAGATGTCT	23H-RNA	F43E2.6	293.88	323.21	101.61	109.37	-1.55	0.26	-5.89	3.83e-09	4.53e-07
WBGene00195185	WAGO Class 22G	F19G12.9	727.52	582.48	303.41	308.4	-1.1	0.19	-5.88	4.22e-09	4.9e-07
MIMAT0020319	miRNA	miR-73-5p	1124.14	1261.45	1933.55	1851.39	0.67	0.11	5.87	4.31e-09	4.92e-07
WBGene00220185	23H target 22G	Y57G11C.1145	3745.14	3559.96	2377.22	2656.38	-0.54	0.09	-5.79	7.21e-09	8.03e-07
WBGene00021669	WAGO Class 22G	Y48G1BM.4	7164.14	6140.99	4491.81	4811.24	-0.52	0.09	-5.78	7.29e-09	8.03e-07
WBGene00008945	WAGO Class 22G	F19B2.6	3365.25	3178.62	2322.83	2261.27	-0.51	0.09	-5.71	1.1e-08	1.19e-06
WBGene00050756	piRNA	21ur-1404, Y73F8A.488	4729.5	3998.27	3059.9	2909.6	-0.55	0.1	-5.65	1.61e-08	1.71e-06
MIMAT0000033	miRNA	miR-61-3p	40107	35364.7	27221.3	29355.2	-0.42	0.07	-5.6	2.19e-08	2.29e-06
MIMAT0000308	miRNA	miR-252-5p	6945.53	7062.95	4789.5	5420.16	-0.46	0.08	-5.59	2.33e-08	2.39e-06
WBGene00219304	WAGO Class 22G	F56D6.16	8738.65	7882.6	5916.56	6315.8	-0.44	0.08	-5.58	2.43e-08	2.46e-06
MIMAT0000032	miRNA	miR-60-3p	2251.86	2206.66	1524.94	1512.44	-0.55	0.1	-5.54	2.95e-08	2.94e-06
MIMAT0000025	miRNA	miR-54-3p	3600.59	3326.27	2518.19	2365.72	-0.5	0.09	-5.49	3.95e-08	3.87e-06
MIMAT0000304	miRNA	miR-248	3116.77	2678.69	1889.89	2010.02	-0.57	0.1	-5.49	4.05e-08	3.91e-06
WBGene00169765	piRNA	21ur-5504, Y105C5B.988	708.41	726.64	395.73	374.42	-0.9	0.16	-5.45	4.91e-08	4.67e-06
WBGene00022239	WAGO Class 22G	Y73B6BL.16	9634.62	8138.38	6126.23	6620.26	-0.48	0.09	-5.41	6.38e-08	5.89e-06
MIMAT0000306	miRNA	miR-250-3p	1483.72	1433.52	867.3	971.51	-0.67	0.12	-5.41	6.38e-08	5.89e-06
MIMAT0000034	miRNA	miR-62	1349.92	1397.48	830.09	901.55	-0.67	0.12	-5.38	7.27e-08	6.61e-06
WBGene00007091	WAGO Class 22G	B0001.6, eri-12	3409.45	2488.02	1716.72	1899.67	-0.71	0.13	-5.38	7.62e-08	6.81e-06
WBGene00046773	piRNA	21ur-453, Y41E3.63	751.42	749.89	414.33	414.81	-0.86	0.16	-5.37	7.71e-08	6.81e-06
MIMAT0000028	miRNA	miR-56-3p	359700	290398	171673	184316	-0.87	0.16	-5.36	8.29e-08	7.22e-06
MIMAT0005033	miRNA	miR-1020-3p	99.15	84.87	5.72	14.78	-3.21	0.6	-5.35	8.95e-08	NA
WBGene00047601	piRNA	21ur-3055, Y105C5B.246	1056.04	1145.19	608.97	699.57	-0.75	0.14	-5.3	1.16e-07	9.95e-06
WBGene00047701	piRNA	21ur-60, R05A10.29	1077.55	1027.76	645.47	637.49	-0.71	0.14	-5.24	1.61e-07	1.37e-05
WBGene00050780	piRNA	21ur-3442, Y73F8A.490	582.98	531.32	295.54	264.06	-0.99	0.19	-5.21	1.89e-07	1.58e-05
MIMAT0020320	miRNA	miR-74-5p	499.35	527.83	935.29	830.61	0.78	0.15	5.09	3.52e-07	2.91e-05
WBGene00049590	piRNA	21ur-4861, H12I19.43	709.6	678.97	386.42	390.18	-0.84	0.17	-5.08	3.87e-07	3.15e-05
WBGene00045311	23H target 22G	Y57G11C.57	2744.04	2491.51	1778.98	1899.67	-0.51	0.1	-5.06	4.11e-07	3.31e-05
WBGene00009572	WAGO Class 22G	F40D4.13	7877.33	7161.77	5504.38	5894.09	-0.4	0.08	-5.02	5.1e-07	4.05e-05
WBGene00016943	WAGO Class 22G	acdh-1, C55B7.4	308.21	255.78	107.34	111.34	-1.37	0.27	-5.01	5.34e-07	4.19e-05
WBGene00044478	WAGO Class 22G	K06B9.6	11612.9	10884.5	8794.7	8962.33	-0.34	0.07	-4.94	7.88e-07	6.1e-05
WBGene00012618	WAGO Class 22G	dct-10, Y38H6C.5	9022.97	7893.06	5972.38	6636.02	-0.42	0.09	-4.91	9.32e-07	7.13e-05
WBGene00022209	WAGO Class 22G	Y73B3A.7	620.01	539.46	309.14	311.36	-0.9	0.18	-4.88	1.07e-06	8.09e-05
WBGene00044670	WAGO Class 22G	K03D3.13, rac-3	16147.7	14268.9	11156.9	12180.3	-0.38	0.08	-4.86	1.2e-06	8.93e-05
MIMAT0020775	miRNA	miR-83-5p	315.38	311.58	592.52	563.59	0.88	0.18	4.85	1.21e-06	8.93e-05
WBGene00173266	piRNA	21ur-8083, Y57G11A.200	373.92	284.84	138.83	138.93	-1.25	0.26	-4.84	1.32e-06	9.6e-05
WBGene00046539	piRNA	21ur-3381, C35D6.24	960.48	887.08	542.42	589.21	-0.71	0.15	-4.81	1.49e-06	0.000107484
WBGene00010533	WAGO Class 22G	K03D3.8	5676.84	5124.85	3922.19	4212.17	-0.41	0.09	-4.8	1.57e-06	0.00011211
ATGGCTGCGGCGAGGATGATGTG	23H-RNA	Y57G11C.1145_hairpin	68.09	36.04	3.58	0.99	-4.44	0.93	-4.76	1.93e-06	NA
WBGene00022730	WAGO Class 22G	ZK402.3	3794.12	3702.96	2711.4	2928.32	-0.41	0.09	-4.72	2.38e-06	0.000166194
WBGene00022730	ERGO Class 26G	ZK402.3	154.11	155.79	136.68	172.43	-0.41	0.09	-4.72	2.38e-06	0.000166194
WBGene00048646	piRNA	21ur-4819, Y57G11A.53	442.01	437.15	239.01	201	-1	0.21	-4.68	2.89e-06	0.000197422
MIMAT0000026	miRNA	miR-55-3p	345894	279879	180163	193770	-0.74	0.16	-4.68	2.9e-06	0.000197422
WBGene00045834	piRNA	21ur-552, Y40H7A.28	2566.05	2054.36	1629.42	1482.88	-0.57	0.12	-4.68	2.93e-06	0.00019762
MIMAT0020774	miRNA	miR-77-5p	9791.11	8894.08	15104.1	19302.1	0.88	0.19	4.67	3.05e-06	0.000203379
WBGene00047558	piRNA	21ur-2822, Y51H4A.171	862.52	827.79	488.75	544.87	-0.71	0.15	-4.66	3.19e-06	0.0002105
WBGene00021018	WAGO Class 22G	W04B5.1	6983.75	8273.24	9786.52	10341.8	0.4	0.09	4.65	3.31e-06	0.000214036
WBGene00021018	ERGO Class 26G	W04B5.1	134.99	136.03	114.5	149.77	0.4	0.09	4.65	3.31e-06	0.000214036
MIMAT0004215	miRNA	miR-253-3p	3305.52	2843.78	1887.75	2333.2	-0.54	0.12	-4.64	3.48e-06	0.000222813
WBGene00046191	piRNA	21ur-3788, Y37A1B.40	1946.04	1721.85	1300.96	1241.48	-0.53	0.11	-4.64	3.57e-06	0.000225338
WBGene00048363	piRNA	21ur-3324, Y105C5A.283	1156.39	1164.95	660.5	809.92	-0.66	0.14	-4.63	3.59e-06	0.000225338
MIMAT0000008	miRNA	miR-37-3p	88140.3	108928	76200.5	74132.3	-0.39	0.08	-4.63	3.74e-06	0.000231971
MIMAT0004222	miRNA	miR-787-3p	1155.2	948.7	686.97	610.89	-0.7	0.15	-4.59	4.5e-06	0.000276783
WBGene00219307	WAGO Class 22G	F56D6.17	2447.78	2007.85	1447.65	1602.1	-0.55	0.12	-4.58	4.68e-06	0.000282181
WBGene00219307	ERGO Class 26G	F56D6.17	38.23	25.58	10.02	22.66	-0.55	0.12	-4.58	4.68e-06	0.000282181
WBGene00012797	WAGO Class 22G	Y43F4A.2	9648.95	8639.47	6899.08	7349.38	-0.36	0.08	-4.57	4.87e-06	0.000291064
MIMAT0000018	miRNA	miR-47-3p	20327.7	19179.8	16410.8	15803.3	-0.29	0.07	-4.51	6.45e-06	0.000381482
MIMAT0015104	miRNA	miR-63-5p	1094.27	948.7	671.95	632.57	-0.65	0.14	-4.49	7.24e-06	0.000424476
MIMAT0015107	miRNA	miR-71-3p	1760.87	1470.72	2314.24	2261.27	0.5	0.11	4.48	7.39e-06	0.000428992
WBGene00044167	WAGO Class 22G	C36A4.11	12146.9	11497.2	9474.52	9689.48	-0.3	0.07	-4.47	7.73e-06	0.000444919
WBGene00013823	WAGO Class 22G	Y116F11B.7	543.55	440.63	264.06	258.15	-0.91	0.2	-4.47	7.83e-06	0.00044629
WBGene00018648	WAGO Class 22G	F49F1.8	25894.6	24025.7	19525.8	20960.4	-0.3	0.07	-4.41	1.05e-05	0.000594959
MIMAT0006586	miRNA	miR-1819-3p	271.18	166.26	72.99	82.77	-1.49	0.34	-4.39	1.15e-05	0.000641819
WBGene00049367	piRNA	21ur-1903, Y105C5A.383	1230.46	1350.97	824.37	918.3	-0.57	0.13	-4.37	1.22e-05	0.000675852
WBGene00018453	WAGO Class 22G	F45D11.6	456.35	369.71	213.96	207.9	-0.97	0.22	-4.37	1.23e-05	0.0006781
WBGene00007920	WAGO Class 22G	C34C12.1	2785.86	2585.68	1927.82	2071.11	-0.43	0.1	-4.36	1.32e-05	0.000717895
MIMAT0004228	miRNA	miR-793	2114.48	1734.64	1276.63	1382.38	-0.53	0.12	-4.36	1.33e-05	0.000718932
WBGene00014562	WAGO Class 22G	Y17D7B.7	3530.11	2749.61	2160.39	2269.16	-0.5	0.12	-4.35	1.34e-05	0.000720567
WBGene00014739	WAGO Class 22G	F21D9.7	1048.88	761.52	513.8	557.68	-0.76	0.17	-4.35	1.39e-05	0.000738796
WBGene00017629	WAGO Class 22G	F20B6.5	3594.61	3236.75	2407.27	2688.89	-0.42	0.1	-4.33	1.46e-05	0.000769841
WBGene00004374	CSR Class 22G	rme-2, T11F8.3	1108.61	1173.09	1733.18	1527.22	0.52	0.12	4.31	1.62e-05	0.000846294
WBGene00017187	WAGO Class 22G	F07B7.6	8729.1	7607.06	6075.43	6597.6	-0.37	0.09	-4.31	1.64e-05	0.000851211
WBGene00047913	piRNA	21ur-3627, Y40H7A.75	1200.59	1127.75	815.78	757.7	-0.56	0.13	-4.3	1.68e-05	0.000861645
WBGene00047906	piRNA	21ur-2290, H25K10.32	886.41	767.33	520.96	519.26	-0.67	0.16	-4.3	1.74e-05	0.000885427
WBGene00045542	piRNA	21ur-194, Y105C5B.33	323.74	287.17	133.82	153.71	-1.09	0.25	-4.29	1.75e-05	0.000885427
WBGene00173197	piRNA	21ur-5457, Y73F8A.1039	504.13	491.79	285.52	279.83	-0.82	0.19	-4.27	1.92e-05	0.000963233
MIMAT0004234	miRNA	miR-799	152.91	122.08	26.48	50.25	-1.86	0.44	-4.25	2.15e-05	0.00107195
WBGene00013945	WAGO Class 22G	ZK228.2	3212.34	2763.56	2038.74	2320.39	-0.46	0.11	-4.24	2.26e-05	0.00111588
WBGene00004240	WAGO Class 22G	M4.2, puf-4	2557.68	2772.86	3341.84	3674.2	0.4	0.09	4.23	2.32e-05	0.00113681
WBGene00021375	23H target 22G	Y37E11B.2	13002.3	12631.9	9926.78	10885.6	-0.3	0.07	-4.21	2.54e-05	0.00123604
WBGene00020723	WAGO Class 22G	T23B12.9	9640.59	8220.92	6470.44	7277.46	-0.38	0.09	-4.18	2.93e-05	0.00141177
WBGene00004677	23H target 22G	F31C3.10, rrn-3.56	2967.44	3227.45	4126.14	3866.33	0.37	0.09	4.17	3.04e-05	0.00145711
WBGene00012798	WAGO Class 22G	Y43F4A.3	4549.12	4099.42	3286.03	3446.59	-0.36	0.09	-4.13	3.63e-05	0.00172465
WBGene00004148	WAGO Class 22G	pqn-65, T13H2.4	3184.86	2863.55	2150.37	2394.29	-0.41	0.1	-4.12	3.78e-05	0.00178102
MIMAT0020778	miRNA	miR-1830-3p	191.14	147.65	64.4	59.12	-1.45	0.35	-4.11	4.04e-05	0.00188244
TGTATTAAACGGTAAGGGCCGGC	23H-RNA	mir-5592	455.15	423.2	251.17	239.43	-0.84	0.2	-4.1	4.05e-05	0.00188244
WBGene00020061	WAGO Class 22G	R13D11.7	10859.1	9207.99	7551.71	8148.46	-0.35	0.09	-4.09	4.3e-05	0.0019834
WBGene00194708	WAGO Class 22G	Y36E3A.2	2880.23	2245.03	1738.9	1893.75	-0.5	0.12	-4.08	4.49e-05	0.00205439
WBGene00047524	piRNA	21ur-2059, Y105C5B.235	927.03	740.59	555.3	475.9	-0.69	0.17	-4.08	4.57e-05	0.00207685
MIMAT0000001	miRNA	let-7-5p	57797	51024.1	29313.8	36495.7	-0.73	0.18	-4.07	4.67e-05	0.00210798
WBGene00019447	WAGO Class 22G	K06C4.15	6748.41	5822.43	4703.63	5082.2	-0.36	0.09	-4.06	4.9e-05	0.00219003
MIMAT0000044	miRNA	miR-72-5p	120056	113198	84924.3	101494	-0.32	0.08	-4.06	4.93e-05	0.00219003
WBGene00016641	WAGO Class 22G	C44C1.1	1336.78	1840.44	2312.81	2305.61	0.54	0.13	4.06	4.96e-05	0.00219003
WBGene00048398	piRNA	21ur-4484, Y105C5B.342	551.91	568.52	329.89	348.8	-0.72	0.18	-4.03	5.54e-05	0.00243204
WBGene00049751	piRNA	21ur-3213, Y105C5B.485	240.12	236.01	105.19	112.32	-1.13	0.28	-4.02	5.82e-05	0.0025365
WBGene00048318	piRNA	21ur-2289, C08F11.41	565.06	499.93	325.6	305.44	-0.75	0.19	-4	6.25e-05	0.00270246
WBGene00012819	WAGO Class 22G	Y43F8B.9	586.56	477.84	306.28	316.28	-0.77	0.19	-3.98	6.83e-05	0.00290657
WBGene00012819	ERGO Class 26G	Y43F8B.9	14.34	58.13	44.37	46.31	-0.77	0.19	-3.98	6.83e-05	0.00290657
WBGene00016552	WAGO Class 22G	C40A11.9	3591.03	3105.37	2537.51	2585.44	-0.39	0.1	-3.98	6.86e-05	0.00290657
WBGene00001832	CSR Class 22G	hcp-4, T03F1.9	2011.74	2126.44	2840.21	2582.48	0.39	0.1	3.97	7.06e-05	0.0029722
WBGene00047023	piRNA	21ur-908, Y105C5B.180	316.57	273.22	138.83	153.71	-1.01	0.26	-3.97	7.29e-05	0.00304793
WBGene00048303	piRNA	21ur-4502, Y105C5A.277	695.27	687.11	420.06	463.09	-0.65	0.16	-3.96	7.55e-05	0.00313761
WBGene00010532	WAGO Class 22G	K03D3.6	8602.47	7576.83	6139.83	6710.91	-0.33	0.08	-3.95	7.84e-05	0.00323365
WBGene00022508	WAGO Class 22G	ZC53.1	2021.3	2062.5	1474.13	1598.16	-0.41	0.1	-3.94	8.18e-05	0.00334277
WBGene00016565	WAGO Class 22G	C41D11.6	6030.45	5362.03	4547.63	4531.41	-0.33	0.08	-3.94	8.21e-05	0.00334277
WBGene00018690	WAGO Class 22G	F52D2.8, fbxa-46	430.06	520.86	258.33	286.72	-0.8	0.21	-3.92	8.74e-05	0.00351315
WBGene00018690	ERGO Class 26G	F52D2.8, fbxa-46	10.75	15.11	11.45	7.88	-0.8	0.21	-3.92	8.74e-05	0.00351315
GATGATGGCGTGGAAGAAGTTGA	23H-RNA	Y57G11C.1145_hairpin	249.68	203.46	85.87	112.32	-1.2	0.31	-3.92	8.92e-05	0.00356335
WBGene00049451	piRNA	21ur-3363, LLC1.35	960.48	932.43	686.97	576.4	-0.58	0.15	-3.89	0.000100006	0.00396986
WBGene00022486	WAGO Class 22G	fbxa-61, Y119D3B.8	1167.14	909.17	684.11	689.71	-0.6	0.15	-3.88	0.000103897	0.00409838
WBGene00013832	WAGO Class 22G	ZC15.3	5639.81	4948.13	4031.68	4317.6	-0.34	0.09	-3.88	0.000106348	0.00416886
WBGene00045774	piRNA	21ur-4765, Y73F8A.65	185.17	196.48	62.97	92.62	-1.3	0.34	-3.87	0.000109656	0.0042718
MIMAT0000050	miRNA	miR-78	584.17	505.74	294.83	355.69	-0.75	0.19	-3.84	0.000121151	0.00469049
WBGene00006789	ALG target 22G	F11C3.3, unc-54	1.19	0	0	0	-0.91	0.24	-3.84	0.000122178	0.00470123
WBGene00021672	WAGO Class 22G	Y48G1BM.7	2652.06	2324.09	1774.68	1966.67	-0.41	0.11	-3.84	0.000124294	0.00474107
WBGene00019071	WAGO Class 22G	F58H7.6	12481.4	11577.4	9612.63	10248.1	-0.28	0.07	-3.84	0.000124725	0.00474107
WBGene00046540	piRNA	21ur-3819, Y73F8A.126	586.56	683.62	387.14	412.84	-0.67	0.17	-3.82	0.000133967	0.00506168
AATTGTGAAGACATCTCAGAAAC	23H-RNA	F43E2.6	59.73	27.9	5.01	3.94	-3.28	0.86	-3.82	0.000134386	NA
MIMAT0000289	miRNA	miR-234-3p	952.11	928.94	634.74	665.08	-0.53	0.14	-3.82	0.000135227	0.00507871
WBGene00019133	WAGO Class 22G	F59H6.2	1434.74	1296.33	968.92	1006.98	-0.47	0.12	-3.8	0.00014444	0.00539243
WBGene00048176	piRNA	21ur-3377, H08M01.27	203.09	165.09	77.28	77.84	-1.25	0.33	-3.79	0.000148636	0.00549967
WBGene00047704	piRNA	21ur-530, Y105C5B.256	597.31	535.97	294.11	383.28	-0.75	0.2	-3.79	0.000149528	0.00549967
WBGene00003970	WAGO Class 22G	F46C3.1, pek-1	548.33	533.64	286.24	363.58	-0.74	0.2	-3.79	0.000149943	0.00549967
WBGene00173525	piRNA	21ur-6228, Y57G11C.1035	50.17	40.69	5.72	5.91	-2.97	0.78	-3.79	0.000151349	NA
WBGene00047055	piRNA	21ur-5432, Y37A1B.58	1433.55	1409.1	1100.59	932.1	-0.48	0.13	-3.79	0.000153016	0.00557974
WBGene00048521	piRNA	21ur-538, Y57G11C.291	924.64	1002.18	505.21	719.27	-0.66	0.17	-3.78	0.000154622	0.00560571
MIMAT0000043	miRNA	miR-71-5p	555588	464472	280630	342127	-0.71	0.19	-3.77	0.000160445	0.0057834
MIMAT0032016	miRNA	miR-789-5p	180.39	123.24	62.97	46.31	-1.47	0.39	-3.76	0.000173034	0.00620153
AGTGGAGTGGATGACGACGACGG	23H-RNA	Y57G11C.51	57.34	40.69	5.01	8.87	-2.84	0.76	-3.75	0.000175667	NA
MIMAT0022193	miRNA	miR-5551-5p	130.21	163.93	40.79	65.03	-1.49	0.4	-3.74	0.000182162	0.00649158
WBGene00050162	piRNA	21ur-776, C10G6.18	275.96	274.38	143.84	138.93	-0.96	0.26	-3.74	0.000184561	0.00653991
WBGene00008740	CSR Class 22G	F13D12.5	3820.4	4073.84	4717.22	5075.3	0.31	0.08	3.73	0.000187841	0.0065478
WBGene00008740	ALG Class 26G	F13D12.5	7.17	4.65	5.72	0.99	0.31	0.08	3.73	0.000187841	0.0065478
WBGene00046853	piRNA	21ur-2934, C27H2.20	427.67	426.68	271.21	218.74	-0.8	0.21	-3.73	0.000187915	0.0065478
MIMAT0000301	miRNA	miR-245-3p	1286.61	1343.99	998.26	907.47	-0.46	0.12	-3.73	0.000191959	0.00665176
MIMAT0000051	miRNA	miR-79-3p	1026.18	964.98	746.37	583.3	-0.58	0.16	-3.72	0.000196817	0.00678261
WBGene00008010	WAGO Class 22G	C38D9.2	13220.9	11862.3	9936.08	10682.7	-0.28	0.08	-3.7	0.00021456	0.00735365
WBGene00047360	piRNA	21ur-2332, Y51H4A.156	489.79	341.81	245.45	203.96	-0.88	0.24	-3.68	0.000230616	0.007861
WBGene00018005	WAGO Class 22G	F33D11.8, nlp-62	941.36	1009.16	1298.81	1367.6	0.45	0.12	3.68	0.00023736	0.00804714
WBGene00046745	piRNA	21ur-4974, F52B11.14	862.52	719.66	507.36	541.92	-0.59	0.16	-3.67	0.000239186	0.00806236
WBGene00020930	WAGO Class 22G	hlh-30, W02C12.3	1094.27	939.4	675.52	734.05	-0.53	0.14	-3.67	0.00024038	0.00806236
WBGene00049117	piRNA	21ur-4649, Y40H7A.106	782.48	608.05	439.38	447.33	-0.65	0.18	-3.66	0.000254206	0.00848075
WBGene00048989	piRNA	21ur-137, M199.42	373.92	345.3	203.95	204.94	-0.81	0.22	-3.65	0.000261259	0.00866992
MIMAT0011436	miRNA	miR-2210-3p	290.29	231.36	134.53	126.12	-1	0.27	-3.65	0.000263492	0.00869802
WBGene00017900	WAGO Class 22G	F28E10.1	995.12	1166.11	1467.69	1487.81	0.45	0.12	3.64	0.000275283	0.00903965
WBGene00049858	piRNA	21ur-1200, Y57G11B.85	965.25	768.5	574.63	584.29	-0.58	0.16	-3.63	0.000281441	0.00915662
MIMAT0000056	miRNA	miR-83-3p	536.38	592.94	339.19	376.39	-0.66	0.18	-3.63	0.000281765	0.00915662
WBGene00001829	CSR Class 22G	hcp-1, ZK1055.1	2511.09	2426.4	3300.34	2958.87	0.34	0.09	3.62	0.000294369	0.00950232
WBGene00011433	WAGO Class 22G	pde-1, T04D3.3	2831.25	3385.56	3816.28	4209.22	0.37	0.1	3.62	0.000295432	0.00950232
WBGene00046462	piRNA	21ur-4554, Y57G11A.18	567.44	427.85	326.31	234.5	-0.82	0.23	-3.61	0.000307039	0.00982525
WBGene00002184	WAGO Class 22G	C47D12.7, kel-1	3545.64	3695.99	4428.12	4415.15	0.29	0.08	3.6	0.000316218	0.0100676
WBGene00010184	WAGO Class 22G	F57A10.2	350.02	310.42	184.62	183.27	-0.84	0.23	-3.6	0.000322863	0.010204
MIMAT0015095	miRNA	miR-42-5p	550.72	609.22	792.17	920.27	0.56	0.16	3.6	0.000323757	0.010204
WBGene00046885	piRNA	21ur-2292, Y105C5A.159	950.92	852.2	631.16	624.68	-0.52	0.15	-3.59	0.000328102	0.0102893
MIMAT0006769	miRNA	miR-1829a-3p	178	161.6	73.71	73.9	-1.2	0.33	-3.59	0.000331457	0.0103428
WBGene00015698	CSR Class 22G	C10H11.10, kca-1	1456.24	1461.42	1964.32	1831.68	0.38	0.11	3.58	0.000341666	0.0106086
WBGene00046361	piRNA	21ur-5450, Y57G11A.16	574.61	583.64	395.73	346.83	-0.64	0.18	-3.58	0.000345922	0.0106816
WBGene00047014	piRNA	21ur-4589, Y73F8A.172	556.69	432.5	319.16	266.03	-0.75	0.21	-3.58	0.000347424	0.0106816
AGTGGAGTGGATGACGACGACG	23H-RNA	Y57G11C.1145_hairpin, Y57G11C.51	254.45	186.02	81.58	117.25	-1.15	0.32	-3.57	0.000353998	0.0108306
WBGene00046545	piRNA	21ur-10, T06A10.18	1002.29	877.78	629.73	680.85	-0.52	0.15	-3.56	0.000366262	0.0110779
WBGene00049600	piRNA	21ur-4230, Y57G11C.375	535.19	511.56	364.24	246.33	-0.77	0.22	-3.56	0.000366838	0.0110779
WBGene00048283	piRNA	21ur-1517, Y116A8C.119	615.23	555.73	372.11	386.24	-0.63	0.18	-3.56	0.000367381	0.0110779
WBGene00010212	WAGO Class 22G	F57G4.8, fbxa-192	6989.73	6822.28	5789.9	5790.63	-0.25	0.07	-3.56	0.000369593	0.0110913
WBGene00016661	WAGO Class 22G	C45B2.6	1385.76	1433.52	915.25	1123.25	-0.47	0.13	-3.55	0.000385558	0.0114607
MIMAT0020307	miRNA	miR-40-5p	735.89	863.83	1175.73	1077.92	0.5	0.14	3.55	0.000386958	0.0114607
WBGene00013953	WAGO Class 22G	ZK262.8	6541.74	5709.65	4853.9	5074.32	-0.3	0.09	-3.55	0.000389386	0.0114607
WBGene00013953	ERGO Class 26G	ZK262.8	2.39	1.16	2.15	0	-0.3	0.09	-3.55	0.000389386	0.0114607
WBGene00019070	WAGO Class 22G	F58H7.5	16512	15199	12877.9	13749.9	-0.25	0.07	-3.54	0.000392738	0.0114607
WBGene00045730	piRNA	21ur-1475, Y40H7A.24	543.55	433.66	297.69	297.56	-0.71	0.2	-3.54	0.000392867	0.0114607
WBGene00045355	ALG Class 26G	D1086.17	32.25	4.65	0	0	-6.9	1.96	-3.53	0.000417927	NA
WBGene00049693	piRNA	21ur-4459, Y57G11C.386	1314.08	1127.75	810.77	931.11	-0.49	0.14	-3.53	0.000420758	0.0122176
WBGene00022275	WAGO Class 22G	txt-7, Y74C9A.1	1112.19	1076.59	796.46	799.08	-0.46	0.13	-3.52	0.000433463	0.0125045
WBGene00050145	piRNA	21ur-4600, Y57G11C.426	474.26	391.8	233.28	278.84	-0.76	0.22	-3.52	0.000434626	0.0125045
WBGene00003216	CSR Class 22G	memi-1, Y17G9B.9	578.2	611.54	868.02	832.58	0.52	0.15	3.51	0.000444934	0.0127227
WBGene00016209	ALG target 22G	C29E4.12	0	0	0.72	0	1.08	0.31	3.51	0.000447062	0.0127227
WBGene00013638	WAGO Class 22G	Y105C5A.14	5052.05	5112.06	4183.39	4259.47	-0.27	0.08	-3.51	0.000450324	0.0127227
WBGene00013638	ERGO Class 26G	Y105C5A.14	144.55	167.42	131.67	180.31	-0.27	0.08	-3.51	0.000450324	0.0127227
WBGene00169771	piRNA	21ur-6113, Y73F8A.801	345.25	329.02	197.51	189.18	-0.8	0.23	-3.5	0.000469695	0.0132104
WBGene00018185	WAGO Class 22G	F38E9.3	2048.78	1831.13	1472.7	1510.47	-0.38	0.11	-3.49	0.000481492	0.0134818
WBGene00047477	piRNA	21ur-4314, H12I19.26	70.48	65.11	13.6	19.71	-2.04	0.58	-3.49	0.00048712	NA
WBGene00009021	WAGO Class 22G	F21D9.8	2597.11	2256.66	1796.15	1955.83	-0.37	0.11	-3.47	0.000529218	0.0147522
WBGene00048199	piRNA	21ur-2949, Y37A1B.89	685.71	642.93	451.54	446.34	-0.56	0.16	-3.46	0.000544666	0.0151157
WBGene00010067	WAGO Class 22G	dot-1.2, F54F7.7	2146.73	2560.1	2853.81	3283.03	0.38	0.11	3.45	0.000553795	0.0153013
WBGene00047120	piRNA	21ur-892, Y105C5B.191	340.47	211.6	110.2	154.69	-1.06	0.31	-3.45	0.000560262	0.0154121
MIMAT0000057	miRNA	miR-84-5p	35912.7	31068.8	19605.2	24026.6	-0.62	0.18	-3.45	0.000564979	0.015474
WBGene00050659	piRNA	21ur-1142, Y105C5A.494	302.24	339.49	187.49	177.35	-0.81	0.24	-3.43	0.000603725	0.0164633
WBGene00019446	WAGO Class 22G	K06C4.14	1974.71	1776.49	1359.64	1508.5	-0.39	0.11	-3.42	0.000625539	0.0169843
WBGene00017152	WAGO Class 22G	EGAP798.1	2793.02	2582.19	2084.54	2197.23	-0.33	0.1	-3.42	0.000630463	0.0170443
WBGene00000249	CSR Class 22G	bir-1, T27F2.3	70.48	65.11	148.84	164.55	1.21	0.35	3.41	0.000639221	0.0172068
WBGene00013779	23H target 22G	Y116A8B.1	825.48	860.34	1112.75	1172.51	0.44	0.13	3.4	0.000667457	0.0177385
WBGene00013779	WAGO Class 22G	Y116A8B.1	825.48	860.34	1112.75	1172.51	0.44	0.13	3.4	0.000667457	0.0177385
WBGene00013779	ERGO Class 26G	Y116A8B.1	243.7	287.17	246.17	226.62	0.44	0.13	3.4	0.000667457	0.0177385
WBGene00048242	piRNA	21ur-5061, Y105C5B.322	1032.15	934.75	689.84	726.17	-0.47	0.14	-3.4	0.00067081	0.0177524
WBGene00235148	WAGO Class 22G	Y60A3A.30	256.84	206.95	118.79	117.25	-0.97	0.29	-3.4	0.000675673	0.017806
WBGene00007769	WAGO Class 22G	C27C7.7	1311.69	1585.82	1849.11	1991.3	0.41	0.12	3.39	0.000700932	0.0183943
WBGene00009657	WAGO Class 22G	F43G6.4	832.65	1052.18	1284.5	1326.22	0.47	0.14	3.39	0.000710332	0.0185633
WBGene00049337	piRNA	21ur-3439, Y73F8A.368	958.09	864.99	668.37	630.59	-0.49	0.14	-3.38	0.000733692	0.0190943
WBGene00009721	WAGO Class 22G	F45D3.1	551.91	509.23	342.06	350.77	-0.62	0.18	-3.37	0.000739987	0.0191785
WBGene00046858	piRNA	21ur-628, Y57G11C.147	486.21	466.21	284.81	321.21	-0.65	0.19	-3.37	0.000762594	0.0196132
WBGene00048973	piRNA	21ur-1932, Y116A8C.139	556.69	580.15	362.81	391.17	-0.59	0.18	-3.37	0.000763015	0.0196132
WBGene00045846	piRNA	21ur-4985, Y105C5B.57	628.37	479	264.77	392.15	-0.76	0.23	-3.36	0.00077356	0.0196721
WBGene00013222	WAGO Class 22G	dmsr-6, Y54G11B.1	688.1	710.36	967.49	957.72	0.46	0.14	3.36	0.000777598	0.0196721
WBGene00014213	WAGO Class 22G	ZK1073.1	1077.55	1312.6	1514.21	1731.18	0.44	0.13	3.36	0.000777816	0.0196721
WBGene00048939	piRNA	21ur-3989, Y73F8A.328	443.2	332.51	208.24	242.38	-0.79	0.23	-3.36	0.00077785	0.0196721
WBGene00013954	WAGO Class 22G	ZK262.9	11034.7	9911.38	8296.64	9117.02	-0.27	0.08	-3.35	0.000821935	0.0207035
WBGene00050499	piRNA	21ur-1961, Y41E3.198	495.77	437.15	291.25	300.52	-0.66	0.2	-3.34	0.000826681	0.0207398
WBGene00047859	piRNA	21ur-2194, Y73F8A.237	1746.54	1690.46	1277.34	1385.34	-0.37	0.11	-3.34	0.000843067	0.0210666
WBGene00048764	piRNA	21ur-2917, C27H2.35	1158.78	916.15	752.09	712.37	-0.5	0.15	-3.32	0.00088456	0.0220157
WBGene00007164	WAGO Class 22G	B0391.9, fbxa-139	981.98	839.42	637.6	658.18	-0.49	0.15	-3.32	0.000913793	0.0226534
WBGene00013630	WAGO Class 22G	Y102A5D.1	23587.8	21899.2	18919	20031.2	-0.22	0.07	-3.31	0.0009198	0.0227126
WBGene00007027	CSR Class 22G	ssl-1, Y111B2A.22	733.5	680.14	1036.19	922.24	0.47	0.14	3.31	0.000941146	0.0231485
WBGene00013221	WAGO Class 22G	Y54G11A.14	20837.8	23547.8	25804.5	26490.9	0.24	0.07	3.3	0.000957833	0.0234669
WBGene00012563	WAGO Class 22G	Y37H2A.3	4043.79	3607.63	2968.3	3220.96	-0.31	0.09	-3.3	0.000974949	0.0237933
WBGene00022731	WAGO Class 22G	ZK402.5	1660.52	1788.12	1298.09	1379.43	-0.37	0.11	-3.29	0.000984393	0.0238383
WBGene00022731	ERGO Class 26G	ZK402.5	41.81	44.18	34.35	43.35	-0.37	0.11	-3.29	0.000984393	0.0238383
TAGACGGTGTGGGTCAACGAGC	23H-RNA	T05E12.8	25.09	37.2	0	4.93	-3.77	1.14	-3.29	0.000986255	NA
WBGene00048010	piRNA	21ur-2671, Y57G11A.41	267.6	318.56	177.47	148.78	-0.84	0.26	-3.29	0.00100033	0.0241311
WBGene00004140	WAGO Class 22G	ebax-1, R09E10.7	537.58	508.07	704.86	800.07	0.52	0.16	3.29	0.0010079	0.0242032
WBGene00046920	piRNA	21ur-603, Y51H4A.119	2134.79	1827.65	1519.21	1547.91	-0.37	0.11	-3.29	0.00101257	0.0242032
WBGene00017990	WAGO Class 22G	cec-4, F32E10.2	221	291.82	407.18	439.45	0.72	0.22	3.29	0.00101821	0.0242032
WBGene00049672	piRNA	21ur-3801, C47A4.59	285.51	385.99	198.22	184.25	-0.81	0.25	-3.29	0.00101876	0.0242032
WBGene00016550	WAGO Class 22G	C40A11.7	938.97	784.77	633.3	572.46	-0.51	0.16	-3.28	0.00102473	0.0242533
WBGene00044281	WAGO Class 22G	R04A9.7	1352.31	1679.99	1989.36	1995.24	0.39	0.12	3.28	0.00103922	0.0244471
WBGene00005387	WAGO Class 22G	srh-171, Y60A3A.5	307.02	251.13	158.15	151.74	-0.85	0.26	-3.28	0.00104571	0.0244471
WBGene00016635	WAGO Class 22G	C44B11.6	4076.05	3735.51	3040.58	3323.43	-0.3	0.09	-3.28	0.00105007	0.0244471
WBGene00016635	ERGO Class 26G	C44B11.6	103.93	76.73	45.08	65.03	-0.3	0.09	-3.28	0.00105007	0.0244471
WBGene00050185	piRNA	21ur-2491, Y105C5B.523	661.82	598.75	405.74	449.3	-0.56	0.17	-3.28	0.00105241	0.0244471
WBGene00048687	piRNA	21ur-5410, Y105C5B.375	1819.41	1827.65	1392.55	1475	-0.35	0.11	-3.27	0.00106372	0.0246186
MIMAT0015116	miRNA	miR-240-5p	593.73	552.25	378.55	392.15	-0.57	0.18	-3.27	0.00107255	0.0247318
WBGene00012357	ALG target 22G	W09D6.4	4.78	4.65	2.86	0.99	-6.52	2	-3.26	0.00111536	NA
WBGene00023498	WAGO Class 22G	lin-15A, ZK678.1	901.94	862.67	646.19	633.55	-0.46	0.14	-3.25	0.00113602	0.0260719
WBGene00015366	WAGO Class 22G	C03A7.2	12849.3	11508.8	10001.2	10551.6	-0.25	0.08	-3.25	0.00113898	0.0260719
WBGene00002181	WAGO Class 22G	K03D10.1, kal-1	529.22	399.94	288.39	289.68	-0.68	0.21	-3.25	0.00116507	0.0265721
MIMAT0000283	miRNA	miR-228-5p	76959.9	63752.6	46649.8	51858.5	-0.51	0.16	-3.24	0.00120451	0.027372
WBGene00050158	piRNA	21ur-2823, Y64G10A.145	148.13	170.91	78	68.97	-1.12	0.34	-3.24	0.00121502	0.0275113
WBGene00049097	piRNA	21ur-1822, Y57G11B.71	181.58	165.09	67.98	94.59	-1.1	0.34	-3.23	0.00123175	0.0277897
WBGene00049524	piRNA	21ur-2724, Y105C5A.404	149.33	66.27	39.36	30.54	-1.62	0.5	-3.22	0.00126513	NA
WBGene00047764	piRNA	21ur-975, Y37A1B.75	241.31	354.6	154.57	171.44	-0.87	0.27	-3.22	0.0012817	0.0288129
WBGene00001423	CSR Class 22G	fib-1, T01C3.7	1081.13	1248.66	1648.74	1441.5	0.41	0.13	3.22	0.00128904	0.0288744
WBGene00022712	WAGO Class 22G	ZK355.2	537.58	578.99	739.93	845.39	0.5	0.16	3.22	0.00130183	0.0290572
WBGene00004420	CSR Class 22G	R13A5.8, rpl-9	121.85	152.3	315.58	212.83	0.95	0.3	3.21	0.00130923	0.0291188
WBGene00016723	WAGO Class 22G	C46G7.3	4507.31	3327.43	2257.71	2482.97	-0.72	0.23	-3.2	0.00135398	0.0299754
WBGene00008503	CSR Class 22G	F01G4.4	3342.55	3308.83	3984.45	3977.67	0.26	0.08	3.2	0.00135731	0.0299754
WBGene00045838	piRNA	21ur-2719, Y57G11A.9	577	583.64	425.78	343.87	-0.59	0.18	-3.2	0.00137026	0.0301554
WBGene00046895	piRNA	21ur-4302, K02B2.9	420.51	316.23	221.12	217.75	-0.75	0.23	-3.2	0.00138055	0.0302756
WBGene00013858	ALG Class 26G	ssp-34, ZC168.6	99.15	34.88	19.32	9.85	-2.18	0.68	-3.2	0.00138976	NA
WBGene00019871	WAGO Class 22G	R04E5.8	3789.34	3539.03	3021.97	3040.65	-0.27	0.09	-3.19	0.00141136	0.0308434
WBGene00014774	WAGO Class 22G	F57G4.7	3165.75	2940.28	2523.2	2471.14	-0.29	0.09	-3.19	0.00142957	0.0310825
WBGene00004313	WAGO Class 22G	F54E4.1, rbc-1	1085.91	942.89	747.08	741.93	-0.45	0.14	-3.19	0.00143221	0.0310825
WBGene00013156	CSR Class 22G	Y53F4B.9	3470.37	3522.75	4322.93	4061.42	0.26	0.08	3.18	0.00149781	0.0323941
WBGene00000267	WAGO Class 22G	bre-2, Y39E4B.9	413.34	374.37	533.84	649.32	0.59	0.18	3.17	0.00153692	0.0328395
WBGene00045572	piRNA	21ur-66, Y41E3.24	535.19	362.74	294.11	240.41	-0.75	0.24	-3.17	0.00153695	0.0328395
WBGene00002219	CSR Class 22G	K11D9.1, klp-7	3362.86	3676.22	4616.32	4030.88	0.3	0.09	3.17	0.0015424	0.0328395
WBGene00002219	ALG Class 26G	K11D9.1, klp-7	3.58	9.3	2.86	0.99	0.3	0.09	3.17	0.0015424	0.0328395
WBGene00044372	WAGO Class 22G	ZC239.21	884.02	1168.44	1322.43	1509.49	0.46	0.15	3.17	0.00154459	0.0328395
WBGene00045652	piRNA	21ur-378, Y105C5A.49	1034.54	946.38	785.73	629.61	-0.48	0.15	-3.16	0.00157526	0.0333785
WBGene00049553	piRNA	21ur-1261, Y105C5A.406	14.34	11.63	0	0	-6.39	2.02	-3.16	0.00158491	NA
WBGene00020352	WAGO Class 22G	T08B6.2	1519.56	1306.79	1069.1	1082.85	-0.39	0.12	-3.16	0.00159438	0.0335472
WBGene00020352	ERGO Class 26G	T08B6.2	2.39	10.46	12.17	3.94	-0.39	0.12	-3.16	0.00159438	0.0335472
MIMAT0004230	miRNA	miR-795-5p	1523.14	1377.71	1119.2	1119.31	-0.37	0.12	-3.16	0.00159927	0.0335472
TCCTTCGATGTCGGCTCTTCCT	23H-RNA	F31C3.10, F31C3.9, rrn-3.1, rrn-3.56	129.02	118.59	60.83	38.43	-1.31	0.41	-3.15	0.00161188	0.0336987
WBGene00166201	piRNA	21ur-5714, F52B11.48	298.66	202.3	138.11	126.12	-0.92	0.29	-3.15	0.00161724	0.0336987
WBGene00046848	piRNA	21ur-68, Y40H7A.55	212.64	156.95	69.41	104.44	-1.1	0.35	-3.15	0.00163506	0.0339572
WBGene00015365	WAGO Class 22G	C03A7.1	7560.76	7239.67	6016.75	6524.68	-0.24	0.08	-3.15	0.00164279	0.0340051
WBGene00001016	CSR Class 22G	dna-2, F43G6.1	665.4	758.03	1026.88	924.22	0.46	0.14	3.15	0.00165782	0.0342034
WBGene00004210	WAGO Class 22G	ptc-3, Y110A2AL.8	91.99	98.82	173.89	205.93	0.99	0.32	3.14	0.00171745	0.0353176
WBGene00049015	piRNA	21ur-4658, C10G6.14	651.07	649.91	441.52	470.98	-0.51	0.16	-3.13	0.00173894	0.0356425
WBGene00048652	piRNA	21ur-5139, Y105C5B.372	372.72	370.88	215.4	248.3	-0.68	0.22	-3.13	0.00176368	0.036032
WBGene00165263	piRNA	21ur-5525, Y40H7A.158	512.49	501.09	342.06	338.94	-0.57	0.18	-3.13	0.00177557	0.0361572
WBGene00167306	piRNA	21ur-6444, Y57G11A.120	86.01	55.81	22.18	19.71	-1.76	0.56	-3.12	0.00181345	NA
WBGene00000177	WAGO Class 22G	aqp-9, K07A1.16	839.82	782.45	1079.84	1074.97	0.41	0.13	3.12	0.00181812	0.0369036
WBGene00169134	piRNA	21ur-5493, Y41E3.328	649.87	560.39	449.4	353.72	-0.59	0.19	-3.12	0.00183499	0.037126
WBGene00047915	piRNA	21ur-1267, Y40H7A.76	284.32	292.98	173.89	166.52	-0.76	0.24	-3.11	0.00187712	0.0378562
WBGene00015601	WAGO Class 22G	C08E3.9, fbxa-166	1386.96	1221.92	964.63	1021.76	-0.39	0.13	-3.11	0.001889	0.0379177
WBGene00047646	piRNA	21ur-4275, Y105C5B.249	20.31	5.81	0	0	-6.4	2.06	-3.11	0.00189061	NA
WBGene00023036	WAGO Class 22G	F39E9.10	4563.45	4373.8	3653.84	3849.58	-0.25	0.08	-3.11	0.00189831	0.0379177
WBGene00023036	ERGO Class 26G	F39E9.10	136.19	173.23	200.37	220.71	-0.25	0.08	-3.11	0.00189831	0.0379177
WBGene00046526	piRNA	21ur-1326, Y67A10A.41	500.55	403.43	270.5	307.41	-0.65	0.21	-3.1	0.00194101	0.0386478
WBGene00018204	ERGO target 22G	F39F10.4	1721.45	2095.05	990.39	1122.26	-1.7	0.55	-3.09	0.00197393	NA
MIMAT0015094	miRNA	miR-37-5p	91.99	99.99	170.31	209.87	0.98	0.32	3.09	0.00200071	0.0397103
WBGene00004622	23H target 22G	F31C3.9, rrn-3.1	9731.38	10283.4	11832.4	11349.7	0.21	0.07	3.09	0.00201753	0.0399177
WBGene00007218	WAGO Class 22G	C01A2.6	1079.94	1039.39	752.81	837.51	-0.42	0.13	-3.08	0.00204049	0.040185
WBGene00011399	WAGO Class 22G	T03F6.3	937.78	1017.3	1222.96	1340.01	0.39	0.13	3.08	0.00204385	0.040185
MIMAT0000029	miRNA	miR-57-5p	36085.9	36264.6	29271.5	33031.3	-0.22	0.07	-3.08	0.00206203	0.0404159
WBGene00049262	piRNA	21ur-2378, Y73F8A.362	881.63	812.67	565.32	658.18	-0.47	0.15	-3.08	0.0020749	0.0404382
WBGene00002889	CSR Class 22G	F20H11.2, let-765	1428.77	1411.43	1034.04	1162.66	-0.37	0.12	-3.08	0.00207607	0.0404382
WBGene00044503	WAGO Class 22G	Y73B6A.6	659.43	660.37	912.39	871.99	0.44	0.14	3.08	0.00209185	0.0406195
WBGene00047506	piRNA	21ur-850, Y73F8A.199	714.38	491.79	362.81	415.8	-0.63	0.21	-3.08	0.00210502	0.0407059
WBGene00014087	CSR Class 22G	ZK809.5	446.79	503.42	702	650.3	0.51	0.17	3.07	0.00210928	0.0407059
MIMAT0006587	miRNA	miR-1820-5p	1906.62	1762.54	1335.31	1537.07	-0.35	0.12	-3.07	0.00214098	0.041191
WBGene00048134	piRNA	21ur-911, Y73F8A.256	218.62	181.37	104.48	105.43	-0.93	0.3	-3.07	0.00214997	0.0412373
WBGene00050439	piRNA	21ur-295, Y105C5B.558	367.94	332.51	239.01	182.28	-0.73	0.24	-3.07	0.00216537	0.041337
WBGene00050838	piRNA	21ur-4252, T23G4.52	118.27	174.39	62.97	68.97	-1.15	0.38	-3.07	0.00217348	0.041337
WBGene00174145	piRNA	21ur-6626, C09B9.75	217.42	169.74	105.19	92.62	-0.97	0.32	-3.07	0.00217494	0.041337
WBGene00046783	piRNA	21ur-47, Y67A10A.48	660.63	626.65	459.41	449.3	-0.5	0.16	-3.06	0.00221536	0.0419781
WBGene00016165	WAGO Class 22G	C27F2.1, wdr-60	2079.84	2274.09	2635.55	2694.81	0.29	0.1	3.05	0.00232339	0.0438925
WBGene00195255	WAGO Class 22G	H16D19.7	351.22	373.2	208.24	246.33	-0.68	0.22	-3.02	0.00249054	0.0467686
WBGene00195255	ERGO Class 26G	H16D19.7	59.73	65.11	33.63	40.4	-0.68	0.22	-3.02	0.00249054	0.0467686
WBGene00021678	WAGO Class 22G	Y48G1C.5	835.04	847.55	1059.8	1154.78	0.4	0.13	3.02	0.00254098	0.0475732
WBGene00020456	WAGO Class 22G	fbxa-60, T12B5.10	674.96	511.56	377.84	417.77	-0.58	0.19	-3.01	0.00257896	0.0481406
WBGene00045530	piRNA	21ur-770, Y7A9D.2	72.87	91.85	33.63	22.66	-1.54	0.51	-3.01	0.00261223	NA
WBGene00049464	piRNA	21ur-2473, T06A10.36	999.9	937.08	732.06	724.2	-0.41	0.14	-3.01	0.00261653	0.0486969
WBGene00047384	piRNA	21ur-2790, Y73F8A.194	180.39	133.7	75.14	75.87	-1.06	0.35	-3	0.00268997	0.0497419
WBGene00170162	piRNA	21ur-5653, Y73F8A.827	746.64	638.28	502.35	478.86	-0.5	0.17	-3	0.00269365	0.0497419
WBGene00048330	piRNA	21ur-4102, Y105C5B.334	606.87	577.82	366.39	448.31	-0.54	0.18	-3	0.00269647	0.0497419
WBGene00019991	WAGO Class 22G	R09H3.3	10548.5	9768.38	8364.63	9034.25	-0.22	0.07	-2.99	0.0027616	0.0507941
WBGene00016273	WAGO Class 22G	C30G12.1	4727.12	5196.93	5649.65	6159.14	0.25	0.08	2.99	0.0027893	0.0510227
WBGene00019536	WAGO Class 22G	K08D12.2, rpi-2	8358.76	9235.89	9991.18	10591	0.23	0.08	2.99	0.0027903	0.0510227
WBGene00000140	WAGO Class 22G	anc-1, ZK973.6	4458.33	4305.2	5127.26	5138.36	0.23	0.08	2.98	0.00284329	0.0518405
WBGene00020684	CSR Class 22G	T22D1.5	798.01	806.86	1056.22	1046.39	0.39	0.13	2.98	0.00287129	0.0521993
WBGene00014944	WAGO Class 22G	Y68A4A.12	330.91	319.72	188.92	214.8	-0.69	0.23	-2.98	0.00290888	0.052614
WBGene00048737	piRNA	21ur-259, Y105C5A.330	289.1	348.79	185.34	203.96	-0.71	0.24	-2.98	0.00291088	0.052614
WBGene00169596	piRNA	21ur-12509, Y57G11C.791	173.22	152.3	75.14	87.69	-1	0.34	-2.97	0.00294337	0.0530483
WBGene00017206	WAGO Class 22G	F07C7.1	1364.26	1166.11	967.49	969.54	-0.39	0.13	-2.97	0.0029934	0.0537954
WBGene00008776	WAGO Class 22G	F13H10.5	1421.6	1481.18	1740.33	1891.78	0.32	0.11	2.97	0.00302629	0.0542311
WBGene00004933	WAGO Class 22G	F55H2.1, sod-4	2822.89	2930.98	3308.21	3612.12	0.27	0.09	2.96	0.00304943	0.0544901
WBGene00048298	piRNA	21ur-3743, Y105C5B.333	178	218.57	92.31	117.25	-0.93	0.31	-2.96	0.00308046	0.0548881
WBGene00046496	piRNA	21ur-4253, ZK616.15	704.83	549.92	410.75	451.27	-0.54	0.18	-2.96	0.00311019	0.0551746
WBGene00018671	WAGO Class 22G	F52C6.14	382.28	342.97	215.4	245.34	-0.66	0.22	-2.96	0.00311413	0.0551746
WBGene00001430	WAGO Class 22G	C50F2.6, fkb-5	303.43	365.06	462.28	543.89	0.59	0.2	2.95	0.00313044	0.0553073
WBGene00169522	piRNA	21ur-6515, K08B4.22	72.87	69.76	25.76	21.68	-1.58	0.54	-2.95	0.00315106	NA
WBGene00021700	WAGO Class 22G	Y48G9A.6	6857.12	5707.33	5104.36	5305.86	-0.27	0.09	-2.95	0.00318335	0.0560841
ATGATGGCGTGGAAGAAGTTGA	23H-RNA	Y57G11C.1145_hairpin	21.5	30.23	4.29	0	-3.49	1.19	-2.94	0.00322967	NA
WBGene00050935	WAGO Class 22G	Y37H2A.16	8942.93	8341.83	7085.85	7706.06	-0.22	0.08	-2.94	0.00323675	0.0568652
TTTGCCGATGTTTCTGAGATG	23H-RNA	F43E2.6	86.01	75.57	32.2	25.62	-1.48	0.5	-2.94	0.00324226	NA
WBGene00022523	WAGO Class 22G	ZC132.4	542.36	592.94	370.68	418.75	-0.53	0.18	-2.94	0.00326471	0.0570369
WBGene00022523	ERGO Class 26G	ZC132.4	9.56	23.25	15.74	15.76	-0.53	0.18	-2.94	0.00326471	0.0570369
WBGene00021398	ALG Class 26G	Y38C1AA.7	52.56	17.44	6.44	3.94	-2.73	0.93	-2.94	0.00329878	NA
WBGene00047367	piRNA	21ur-928, Y57G11C.200	352.41	346.46	161.73	254.21	-0.76	0.26	-2.93	0.00337691	0.0588334
WBGene00020457	WAGO Class 22G	fbxa-67, T12B5.11	9051.64	8504.6	7448.66	7729.71	-0.21	0.07	-2.93	0.00339436	0.0589492
WBGene00015735	WAGO Class 22G	C13B9.4, pdfr-1	12725.1	12118	10574.4	11072.9	-0.2	0.07	-2.93	0.00340236	0.0589492
WBGene00046269	piRNA	21ur-4638, Y57G11A.14	416.92	441.8	259.05	308.4	-0.6	0.21	-2.92	0.00352315	0.0608738
CGATGGCTGCGGCGAGGATGATG	23H-RNA	Y57G11C.1145_hairpin	25.09	13.95	1.43	0.99	-3.99	1.37	-2.92	0.00354991	NA
WBGene00010213	WAGO Class 22G	F57G4.9	1781.18	1703.25	1323.86	1461.21	-0.32	0.11	-2.91	0.00357627	0.0616219
WBGene00050473	piRNA	21ur-1949, Y45F10D.56	966.45	848.72	608.26	724.2	-0.45	0.15	-2.91	0.00359056	0.0616239
WBGene00003124	WAGO Class 22G	K10B3.9, mai-1	800.4	849.88	1084.13	1064.13	0.38	0.13	2.91	0.00359604	0.0616239
WBGene00048992	piRNA	21ur-3550, Y73F8A.335	1299.75	1348.65	1081.98	987.27	-0.35	0.12	-2.91	0.00366367	0.0626118
WBGene00166788	piRNA	21ur-5521, F52B11.52	812.34	769.66	558.17	609.9	-0.44	0.15	-2.9	0.0036858	0.0628188
WBGene00171060	piRNA	21ur-5524, Y116A8C.353	378.69	544.11	293.4	299.53	-0.64	0.22	-2.9	0.00373606	0.0635029
WBGene00003902	ALG target 22G	pab-1, Y106G6H.2	8.36	5.81	0	2.96	0.27	0.09	2.9	0.0037588	0.0637167
WBGene00049101	piRNA	21ur-864, Y57G11C.340	824.29	767.33	623.29	539.95	-0.45	0.16	-2.9	0.00377184	0.0637654
WBGene00046398	piRNA	21ur-2584, Y45F10D.24	481.43	505.74	352.07	326.14	-0.54	0.19	-2.89	0.00382325	0.0643856
WBGene00019372	WAGO Class 22G	K03H9.3	275.96	199.97	139.54	127.1	-0.83	0.29	-2.89	0.0038322	0.0643856
WBGene00020473	WAGO Class 22G	lips-12, T13B5.6	1450.27	1547.45	2032.3	1743	0.33	0.12	2.89	0.00383932	0.0643856
WBGene00167383	piRNA	21ur-5596, Y45F10D.75	47.78	27.9	10.02	0.99	-2.73	0.94	-2.89	0.0038644	NA
WBGene00017148	WAGO Class 22G	EGAP2.2	2237.53	2351.99	2657.02	2905.66	0.28	0.1	2.89	0.00387444	0.0648013
WBGene00045763	piRNA	21ur-3601, Y105C5A.61	1217.32	1008	856.57	824.7	-0.4	0.14	-2.89	0.0039122	0.0649661
WBGene00010402	WAGO Class 22G	H16D19.4	2145.54	2048.55	1707.42	1726.25	-0.29	0.1	-2.89	0.00391267	0.0649661
WBGene00012896	CSR Class 22G	snrp-200, Y46G5A.4	8952.49	8816.19	10478.5	9907.23	0.2	0.07	2.88	0.00391537	0.0649661
WBGene00046154	piRNA	21ur-4599, Y73F8A.90	1137.28	933.59	791.45	759.67	-0.42	0.14	-2.88	0.00403073	0.0667038
MIMAT0011439	miRNA	miR-2212-5p	131.41	69.76	42.94	33.5	-1.39	0.48	-2.87	0.0040692	NA
WBGene00010785	CSR Class 22G	K12D12.1, top-2	5037.72	5439.92	6101.19	6103.96	0.22	0.08	2.87	0.00411981	0.0679985
WBGene00018528	ALG target 22G	F47B3.4	5.97	2.33	3.58	6.9	-6.11	2.14	-2.86	0.00427319	NA
WBGene00167502	piRNA	21ur-7530, C26C9.9	387.06	384.83	269.06	237.46	-0.61	0.21	-2.85	0.00430626	0.0708894
WBGene00018223	WAGO Class 22G	bath-13, F40B1.1	5779.58	5332.96	4426.69	4953.12	-0.25	0.09	-2.85	0.00437285	0.0717972
WBGene00014992	WAGO Class 22G	ZK1025.1	3377.19	3027.48	2634.83	2696.78	-0.26	0.09	-2.85	0.0043849	0.071807
MIMAT0000009	miRNA	miR-38-3p	6479.62	8367.41	5255.35	4544.22	-0.6	0.21	-2.85	0.00439764	0.0718281
WBGene00167425	piRNA	21ur-5662, Y105C5B.782	385.86	305.77	237.58	191.15	-0.69	0.24	-2.85	0.00443726	0.0721969
WBGene00019938	WAGO Class 22G	R07E4.5	1020.21	934.75	753.52	737.99	-0.39	0.14	-2.84	0.00444324	0.0721969
WBGene00002228	CSR Class 22G	C06G3.2, klp-18	4513.28	4583.07	5706.18	5037.86	0.24	0.08	2.83	0.00458446	0.074299
WBGene00000481	WAGO Class 22G	cha-1, ZC416.8	148.13	152.3	246.88	256.18	0.74	0.26	2.83	0.00464655	0.0751112
WBGene00004089	WAGO Class 22G	ppk-3, VF11C1L.1	728.72	730.13	538.85	541.92	-0.43	0.15	-2.83	0.00466557	0.0752249
WBGene00050440	piRNA	21ur-771, H12I19.50	256.84	188.35	108.77	137.94	-0.86	0.3	-2.83	0.00468909	0.0754102
WBGene00016083	ALG target 22G	C25A8.2	2.39	0	0	0.99	-1.26	0.45	-2.82	0.00475088	NA
WBGene00049299	piRNA	21ur-602, Y73F8A.364	590.14	541.78	334.18	442.4	-0.55	0.19	-2.82	0.00476935	0.0765048
WBGene00046248	piRNA	21ur-197, Y116A8C.70	968.84	840.58	718.46	624.68	-0.43	0.15	-2.82	0.00478737	0.0765979
WBGene00046730	piRNA	21ur-224, C06E7.16	14.34	27.9	2.86	0	-3.77	1.34	-2.82	0.00483586	NA
WBGene00050154	piRNA	21ur-5387, Y73F8A.438	225.78	246.48	147.41	129.07	-0.77	0.27	-2.82	0.00485279	0.077447
WBGene00044217	WAGO Class 22G	F23D12.9	10020.5	11225.1	12347.6	12192.1	0.21	0.07	2.81	0.00488074	0.0776955
WBGene00013152	WAGO Class 22G	Y53F4B.5	21017	18882.2	17026.9	17710.8	-0.2	0.07	-2.81	0.00491077	0.0779476
WBGene00013755	WAGO Class 22G	fbxa-115, Y113G7B.3	1682.03	1663.72	1352.48	1360.7	-0.3	0.11	-2.81	0.00492143	0.0779476
WBGene00023404	WAGO Class 22G	plr-1, Y47D3B.11	1894.67	2177.6	2405.13	2593.32	0.3	0.11	2.81	0.00496644	0.0784623
WBGene00045802	piRNA	21ur-1687, Y40H7A.26	172.03	182.53	95.89	96.56	-0.88	0.31	-2.81	0.00499791	0.078761
WBGene00002229	CSR Class 22G	klp-19, Y43F4B.6	1401.29	1582.33	2024.43	1735.12	0.33	0.12	2.8	0.00505367	0.079181
WBGene00002229	ALG Class 26G	klp-19, Y43F4B.6	0	3.49	5.01	12.81	0.33	0.12	2.8	0.00505367	0.079181
WBGene00050726	piRNA	21ur-4895, Y37A1A.71	252.07	275.54	174.61	140.9	-0.74	0.26	-2.8	0.00506243	0.079181
ATGACGACGACGATGGCTGCGGC	23H-RNA	Y57G11C.1145_hairpin	22.7	9.3	0	0.99	-5.22	1.87	-2.8	0.00517659	NA
WBGene00006756	WAGO Class 22G	unc-17, ZC416.8	148.13	152.3	246.88	253.22	0.73	0.26	2.8	0.00517728	0.0805455
WBGene00000915	CSR Class 22G	C47E8.5, hsp-90	918.66	1021.95	1273.05	1207	0.35	0.13	2.8	0.0051882	0.0805455
WBGene00000915	ALG Class 26G	C47E8.5, hsp-90	2.39	10.46	5.72	3.94	0.35	0.13	2.8	0.0051882	0.0805455
WBGene00009035	CSR Class 22G	F22B3.4, gfat-2	1550.62	1606.75	1991.51	1872.08	0.29	0.1	2.79	0.00524192	0.0811785
WBGene00049436	piRNA	21ur-4578, Y57G11C.366	167.25	196.48	74.42	115.28	-0.95	0.34	-2.79	0.00525862	0.0812366
WBGene00047319	piRNA	21ur-1474, C27H2.25	382.28	277.87	197.51	212.83	-0.69	0.25	-2.78	0.00539811	0.0831866
WBGene00008949	WAGO Class 22G	F19B6.3	657.04	505.74	349.93	442.4	-0.56	0.2	-2.78	0.00543578	0.0835619
TCAATGACGGAGTCGAGATCGAC	23H-RNA	Y37E11B.2	10.75	9.3	0	0	-6.02	2.17	-2.78	0.0054553	NA
WBGene00049094	piRNA	21ur-1476, Y73F8A.345	163.66	108.12	54.39	72.91	-1.1	0.4	-2.78	0.00545533	0.0836573
WBGene00004874	CSR Class 22G	F35G12.8, smc-4	1146.84	1273.07	1536.39	1492.74	0.32	0.12	2.78	0.00546978	0.0836743
WBGene00050662	piRNA	21ur-495, Y4C6A.20	198.31	266.24	125.23	141.88	-0.8	0.29	-2.78	0.00548571	0.0837138
WBGene00049140	piRNA	21ur-3957, Y64G10A.113	401.39	418.55	302.7	238.44	-0.6	0.21	-2.77	0.00559006	0.0850991
WBGene00050183	piRNA	21ur-5092, C47A4.66	13.14	6.98	0	0	-6.02	2.17	-2.77	0.00560151	NA
WBGene00048787	piRNA	21ur-2139, Y73F8A.311	297.46	311.58	173.89	209.87	-0.67	0.24	-2.77	0.0056571	0.0859113
WBGene00013404	WAGO Class 22G	fbxb-101, Y63D3A.3	287.9	194.16	106.62	158.63	-0.87	0.31	-2.76	0.00571932	0.0866464
WBGene00012148	CSR Class 22G	inos-1, VF13D12L.1	1906.62	1963.67	2495.29	2213.98	0.28	0.1	2.76	0.0057528	0.0869379
WBGene00050427	piRNA	21ur-2049, Y57G11C.457	7.17	12.79	0	0	-6.01	2.18	-2.76	0.00575562	NA
WBGene00044220	WAGO Class 22G	Y102A5C.35	2933.99	2843.78	2343.58	2505.63	-0.25	0.09	-2.76	0.00576629	0.0869379
WBGene00021095	WAGO Class 22G	mlt-8, W08F4.6	1741.76	2015.99	2319.97	2279.99	0.29	0.11	2.76	0.00578464	0.0870055
WBGene00172917	piRNA	21ur-6409, H12I19.102	268.79	216.25	143.84	143.85	-0.75	0.27	-2.76	0.00581051	0.0871855
TATTAAACGGTAAGGGCCGGCTG	23H-RNA	mir-5592	28.67	30.23	4.29	5.91	-2.54	0.92	-2.76	0.00581141	NA
WBGene00021885	WAGO Class 22G	Y54G2A.20	1167.14	1047.53	896.64	813.86	-0.37	0.13	-2.76	0.00584746	0.0875305
WBGene00021884	WAGO Class 22G	Y54G2A.19	1644.99	1846.25	2223.36	2058.3	0.3	0.11	2.75	0.00591325	0.0883045
WBGene00048916	piRNA	21ur-4527, VY10G11R.20	151.72	131.38	72.28	70.94	-0.98	0.36	-2.75	0.00594858	0.0886211
WBGene00168595	piRNA	21ur-7129, Y57G11B.154	296.27	399.94	244.02	187.21	-0.69	0.25	-2.75	0.00602768	0.0895867
WBGene00048385	piRNA	21ur-1437, Y105C5B.340	1310.5	1127.75	936	965.6	-0.36	0.13	-2.74	0.00605112	0.0897225
WBGene00050825	piRNA	21ur-2545, Y41E3.211	91.99	58.13	19.32	33.5	-1.52	0.55	-2.74	0.00613306	NA
WBGene00003883	WAGO Class 22G	osm-1, T27B1.1	399	290.66	201.8	232.53	-0.67	0.24	-2.74	0.00615331	0.0910226
WBGene00045992	piRNA	21ur-2309, H04M03.17	537.58	339.49	260.48	295.59	-0.66	0.24	-2.74	0.00621035	0.0914678
WBGene00022297	WAGO Class 22G	Y76B12C.3	258.04	224.39	353.51	378.36	0.6	0.22	2.73	0.00624675	0.0914678
WBGene00003787	CSR Class 22G	K07F5.13, npp-1	931.8	968.47	1202.2	1199.12	0.34	0.12	2.73	0.00625966	0.0914678
WBGene00050529	piRNA	21ur-1547, Y105C5B.566	984.37	911.5	694.13	759.67	-0.38	0.14	-2.73	0.00628654	0.0914678
WBGene00014309	WAGO Class 22G	F07H5.5	2968.63	2252	1998.67	2134.17	-0.34	0.12	-2.73	0.00628836	0.0914678
WBGene00012452	WAGO Class 22G	Y17D7B.4	3961.36	3114.67	2941.11	2797.28	-0.3	0.11	-2.73	0.00629733	0.0914678
WBGene00012452	ERGO Class 26G	Y17D7B.4	40.62	36.04	32.92	39.41	-0.3	0.11	-2.73	0.00629733	0.0914678
WBGene00044435	WAGO Class 22G	Y20F4.8	2876.65	2446.16	2078.81	2269.16	-0.29	0.11	-2.73	0.00630008	0.0914678
MIMAT0000296	miRNA	miR-240-3p	475.46	483.65	321.3	350.77	-0.51	0.19	-2.73	0.00631843	0.091511
WBGene00010896	CSR Class 22G	M28.5	512.49	445.29	684.83	630.59	0.46	0.17	2.73	0.00636245	0.091511
WBGene00018202	WAGO Class 22G	F39F10.2	17555	18348.5	19817.8	20720	0.18	0.06	2.73	0.0063687	0.091511
WBGene00000962	CSR Class 22G	dhc-1, T21E12.4	2469.28	2504.29	3000.5	2885.96	0.24	0.09	2.73	0.00637824	0.091511
WBGene00017725	WAGO Class 22G	F22H10.1	516.08	360.41	304.13	266.03	-0.62	0.23	-2.73	0.00638192	0.091511
WBGene00015015	WAGO Class 22G	B0047.4, math-1	1023.79	987.07	738.5	816.82	-0.37	0.14	-2.73	0.0063906	0.091511
WBGene00044443	WAGO Class 22G	ZC21.10	1234.04	1456.77	1660.9	1706.55	0.32	0.12	2.72	0.00644471	0.0920757
WBGene00021835	WAGO Class 22G	Y54E10A.17	728.72	930.1	1036.9	1168.57	0.41	0.15	2.72	0.00648466	0.092246
WBGene00001335	WAGO Class 22G	F35A5.8	426.48	384.83	260.48	288.69	-0.56	0.21	-2.72	0.00649371	0.092246
WBGene00047316	piRNA	21ur-1237, Y105C5B.215	841.01	790.59	674.09	510.39	-0.46	0.17	-2.72	0.00650076	0.092246
WBGene00047086	piRNA	21ur-4536, Y57G11C.176	409.76	341.81	265.49	227.61	-0.61	0.22	-2.72	0.00662418	0.0937852
TGGATGATGGCGTGGAAGAAGTT	23H-RNA	Y57G11C.1145_hairpin	8.36	24.42	0.72	0.99	-4.29	1.58	-2.71	0.00666579	NA
WBGene00171796	piRNA	21ur-6259, Y57G11A.179	106.32	105.8	40.79	55.18	-1.15	0.43	-2.71	0.00679703	0.0960156
WBGene00015689	ALG Class 26G	C10G11.9, spch-2	94.38	45.34	26.48	19.71	-1.59	0.59	-2.7	0.00683152	NA
WBGene00007624	CSR Class 22G	C16C10.3, hrde-1	2287.7	2439.19	2830.91	2783.48	0.25	0.09	2.7	0.00690068	0.0970427
WBGene00007624	ALG Class 26G	C16C10.3, hrde-1	4.78	10.46	0	0.99	0.25	0.09	2.7	0.00690068	0.0970427
WBGene00169138	piRNA	21ur-6818, Y37A1A.104	212.64	190.67	111.63	121.19	-0.79	0.29	-2.7	0.0069257	0.0971767
WBGene00006405	CSR Class 22G	itsn-1, Y116A8C.36	751.42	669.67	1015.43	863.13	0.4	0.15	2.7	0.00694493	0.0972291
WBGene00077453	CSR Class 22G	Y62F5A.12	64.51	39.53	129.52	102.47	1.16	0.43	2.7	0.00698499	0.097572
WBGene00004057	WAGO Class 22G	F42G8.4, pmk-3	7099.63	7160.61	7909.51	8385.92	0.19	0.07	2.7	0.00701264	0.0977406
WBGene00011497	WAGO Class 22G	T05F1.13	1096.66	1194.02	1477.71	1382.38	0.32	0.12	2.69	0.00708845	0.0985781
WBGene00007278	CSR Class 22G	C03D6.6, lab-1	57.34	103.47	154.57	167.5	1	0.37	2.69	0.00718848	0.0996982
WBGene00011049	WAGO Class 22G	R06A4.6, sdz-26	10398	11170.5	11982	12608	0.19	0.07	2.69	0.00720869	0.0996982
WBGene00002994	CSR Class 22G	lin-5, T09A5.10	1937.68	1936.93	2362.19	2272.11	0.26	0.1	2.69	0.00721667	0.0996982
WBGene00022257	CSR Class 22G	puf-11, Y73B6BL.38	955.7	1080.08	1374.66	1217.84	0.35	0.13	2.69	0.00724237	0.0998332
WBGene00049950	piRNA	21ur-5170, Y116A8C.163	172.03	176.72	100.18	93.6	-0.85	0.32	-2.68	0.0072924	0.100303
WBGene00166527	piRNA	21ur-6983, ZK616.30	80.04	51.16	26.48	17.74	-1.56	0.58	-2.68	0.00734605	NA
MIMAT0000297	miRNA	miR-241-5p	18747.2	14203.8	9403.67	11518.2	-0.66	0.24	-2.68	0.00735942	0.101003
WBGene00049556	piRNA	21ur-5151, Y116A8C.151	127.82	118.59	57.25	64.04	-1.02	0.38	-2.67	0.0074832	0.102477
WBGene00021013	WAGO Class 22G	W03G1.8	6092.57	5577.11	4899.7	5159.05	-0.21	0.08	-2.67	0.00754116	0.102685
WBGene00018803	WAGO Class 22G	F54D10.2, fbxa-24	1058.43	918.47	764.26	760.65	-0.37	0.14	-2.67	0.00756034	0.102685
WBGene00019573	WAGO Class 22G	K09E3.1	1555.4	1511.41	1189.32	1293.7	-0.31	0.11	-2.67	0.00756764	0.102685
WBGene00004120	WAGO Class 22G	F29C12.1, pqn-32	284.32	346.46	200.37	205.93	-0.64	0.24	-2.67	0.00758987	0.102685
MIMAT0000011	miRNA	miR-40-3p	172133	189459	121577	147940	-0.42	0.16	-2.67	0.00759334	0.102685
WBGene00050317	piRNA	21ur-4389, Y73F8A.447	34.64	19.76	2.86	5.91	-2.66	1	-2.67	0.0075997	NA
WBGene00020538	WAGO Class 22G	T16A1.9	1026.18	1404.45	1273.05	1722.31	0.56	0.21	2.67	0.00761296	0.102685
WBGene00020538	ERGO Class 26G	T16A1.9	303.43	427.85	491.62	587.24	0.56	0.21	2.67	0.00761296	0.102685
WBGene00018309	WAGO Class 22G	F41G4.5	370.33	297.63	203.95	228.59	-0.63	0.24	-2.67	0.0076569	0.103056
WBGene00050487	piRNA	21ur-247, Y105C5A.477	1036.93	861.51	725.62	721.24	-0.39	0.15	-2.67	0.00767936	0.103137
TTGCCGATGTTTCTGAGATGT	23H-RNA	F43E2.6	5.97	12.79	0	0	-5.93	2.22	-2.67	0.00768251	NA
WBGene00169133	piRNA	21ur-6714, Y57G11C.764	31.06	9.3	0.72	2.96	-3.52	1.32	-2.66	0.00773814	NA
WBGene00166476	piRNA	21ur-6588, Y105C5B.725	14.34	4.65	0	0	-5.94	2.23	-2.66	0.00776904	NA
WBGene00020652	CSR Class 22G	egg-4, T21E3.1	1492.08	1500.95	1918.52	1737.09	0.29	0.11	2.66	0.0077844	0.104324
WBGene00010507	23H target 22G	K02E2.6	6044.78	6187.49	5111.52	5508.84	-0.2	0.08	-2.66	0.00789121	0.105009
WBGene00010507	WAGO Class 22G	K02E2.6	6044.78	6187.49	5111.52	5508.84	-0.2	0.08	-2.66	0.00789121	0.105009
WBGene00010507	ERGO Class 26G	K02E2.6	286.71	360.41	301.98	349.78	-0.2	0.08	-2.66	0.00789121	0.105009
WBGene00050608	piRNA	21ur-258, C52D10.57	526.83	524.34	369.96	387.22	-0.47	0.18	-2.66	0.0079066	0.105009
WBGene00002034	CSR Class 22G	F57C9.5, htp-3	1065.6	1060.31	1369.65	1279.91	0.32	0.12	2.66	0.00791921	0.105009
WBGene00171779	piRNA	21ur-8969, F38C2.73	198.31	124.4	88.02	77.84	-0.96	0.36	-2.65	0.00796974	0.105456
WBGene00048672	piRNA	21ur-3730, Y64G10A.98	187.56	197.65	109.49	113.31	-0.79	0.3	-2.65	0.00802047	0.105772
WBGene00046955	piRNA	21ur-5105, C27H2.21	303.43	294.14	212.53	164.55	-0.66	0.25	-2.65	0.00803985	0.105772
WBGene00048714	piRNA	21ur-3708, Y57G11A.56	310.6	239.5	166.02	175.38	-0.69	0.26	-2.65	0.00804419	0.105772
WBGene00170260	piRNA	21ur-5935, Y116A8A.102	562.67	544.11	428.64	363.58	-0.48	0.18	-2.65	0.00810057	0.106155
WBGene00012899	WAGO Class 22G	Y46G5A.7	510.1	630.14	759.97	775.43	0.43	0.16	2.65	0.00811172	0.106155
WBGene00016640	WAGO Class 22G	C44B12.7	5532.29	5157.4	4381.61	4797.45	-0.22	0.08	-2.65	0.00813158	0.106155
WBGene00010579	CSR Class 22G	K05C4.2	1549.42	1661.39	1967.18	1918.39	0.28	0.1	2.64	0.00819525	0.106155
WBGene00016110	WAGO Class 22G	C25G6.5, npr-11	1499.25	1806.72	2020.13	2058.3	0.3	0.11	2.64	0.008211	0.106155
WBGene00049520	piRNA	21ur-2721, Y51H4A.309	1001.09	1041.71	800.04	804.99	-0.35	0.13	-2.64	0.00823086	0.106155
WBGene00050697	piRNA	21ur-4557, Y105C5B.590	280.74	222.06	176.04	114.3	-0.79	0.3	-2.64	0.00823694	0.106155
WBGene00044655	WAGO Class 22G	fbxa-194, M162.11	365.55	345.3	234.72	243.37	-0.57	0.22	-2.64	0.00826168	0.106155
WBGene00010056	CSR Class 22G	F54D5.14, smc-6	977.2	999.86	1373.23	1146.89	0.35	0.13	2.64	0.00827248	0.106155
WBGene00021357	WAGO Class 22G	Y37E11AL.1	1897.06	1889.27	2206.9	2321.38	0.26	0.1	2.64	0.00827455	0.106155
WBGene00165850	piRNA	21ur-6176, Y105C5A.569	174.41	95.34	47.95	75.87	-1.13	0.43	-2.64	0.00828074	0.106155
WBGene00044371	WAGO Class 22G	ZC239.20	224.59	238.34	353.51	339.93	0.58	0.22	2.64	0.00829315	0.106155
WBGene00016837	CSR Class 22G	C50F2.3, syf-1	407.37	384.83	509.51	598.08	0.48	0.18	2.64	0.00829335	0.106155
WBGene00016416	ALG target 22G	C34F11.5	0	1.16	1.43	0	-1.49	0.57	-2.64	0.00831072	NA
WBGene00001235	CSR Class 22G	elb-1, Y41C4A.10	248.48	290.66	405.74	387.22	0.56	0.21	2.64	0.00832971	0.106403
WBGene00018974	CSR Class 22G	F56D12.6, fcho-1	342.86	351.11	472.29	503.49	0.49	0.19	2.63	0.00850762	0.108455
WBGene00170417	piRNA	21ur-6497, Y37A1A.110	38.23	31.39	10.02	4.93	-2.2	0.84	-2.63	0.00858579	NA
WBGene00048765	piRNA	21ur-4258, Y73F8A.308	516.08	595.26	397.87	404.96	-0.47	0.18	-2.63	0.00860595	0.109346
WBGene00009310	WAGO Class 22G	F32A11.5	47731.1	49361.6	52920.6	55424.3	0.16	0.06	2.63	0.0086124	0.109346
WBGene00021802	WAGO Class 22G	Y53G8AM.1	414.53	218.57	172.46	196.08	-0.78	0.3	-2.62	0.00867186	0.109879
WBGene00045896	piRNA	21ur-2957, Y37A1B.33	41.81	40.69	7.87	13.79	-1.95	0.74	-2.62	0.00868586	NA
WBGene00021893	WAGO Class 22G	ndnf-1, Y54G2A.29	1456.24	1857.87	2067.36	2072.09	0.32	0.12	2.62	0.00871151	0.110158
WBGene00010211	WAGO Class 22G	F57G4.6	912.69	784.77	593.23	686.76	-0.41	0.16	-2.62	0.00878261	0.110696
WBGene00077712	WAGO Class 22G	F40A3.5, nipi-4	3233.84	3857.59	4066.03	4420.07	0.26	0.1	2.62	0.0087893	0.110696
WBGene00011267	WAGO Class 22G	fbxb-85, R17.1	5962.35	5627.11	4894.69	5170.88	-0.2	0.08	-2.62	0.00885153	0.11074
WBGene00010283	CSR Class 22G	ccz-1, F58G11.6	360.78	351.11	546	459.15	0.5	0.19	2.62	0.0088618	0.11074
WBGene00019503	CSR Class 22G	K07H8.1, tbce-1	106.32	79.06	182.48	157.65	0.88	0.34	2.62	0.00888353	0.11074
WBGene00047742	piRNA	21ur-330, ZK550.13	127.82	132.54	33.63	82.77	-1.18	0.45	-2.62	0.0088885	0.11074
WBGene00010148	WAGO Class 22G	F56D5.3	615.23	570.85	720.61	866.08	0.42	0.16	2.62	0.0088938	0.11074
WBGene00019246	CSR Class 22G	H27M09.2, rpb-5	193.53	189.51	328.46	268.99	0.64	0.25	2.62	0.00889879	0.11074
WBGene00047801	piRNA	21ur-5000, Y57G11A.38	538.77	520.86	349.21	410.87	-0.48	0.18	-2.61	0.00893931	0.111024
WBGene00048276	piRNA	21ur-2341, Y105C5B.326	47.78	55.81	12.88	19.71	-1.68	0.64	-2.61	0.00896725	NA
WBGene00050074	piRNA	21ur-1051, F52B11.36	89.6	38.37	11.45	27.59	-1.73	0.66	-2.61	0.00901939	NA
WBGene00166771	piRNA	21ur-5771, C31H1.44	434.84	434.82	260.48	335.99	-0.55	0.21	-2.61	0.00903198	0.111954
WBGene00170479	piRNA	21ur-7004, ZK616.45	25.09	13.95	2.86	0.99	-3.29	1.26	-2.61	0.00903816	NA
WBGene00019589	WAGO Class 22G	K09F6.6	442.01	333.67	267.63	248.3	-0.59	0.22	-2.61	0.00909088	0.112462
WBGene00008086	WAGO Class 22G	C44C10.5	15372.4	16629	17763.3	18387.7	0.18	0.07	2.61	0.00918101	0.113353
WBGene00046307	piRNA	21ur-648, Y105C5B.105	341.66	232.53	203.23	133.02	-0.77	0.29	-2.6	0.00925189	0.113975
WBGene00046588	piRNA	21ur-3215, Y73F8A.131	352.41	330.19	248.31	201	-0.6	0.23	-2.6	0.00926774	0.113975
WBGene00013795	WAGO Class 22G	nhr-229, Y116A8C.18	660.63	409.24	348.5	364.56	-0.59	0.23	-2.6	0.00936977	0.11478
WBGene00013795	ALG Class 26G	nhr-229, Y116A8C.18	0	0	0	2.96	-0.59	0.23	-2.6	0.00936977	0.11478
WBGene00019435	WAGO Class 22G	K06A9.1	887.6	887.08	1113.47	1114.38	0.33	0.13	2.59	0.00953568	0.116584
WBGene00049091	piRNA	21ur-4384, Y37A1B.115	7.17	10.46	0	0	-5.84	2.25	-2.59	0.00955597	NA
WBGene00048657	piRNA	21ur-4934, Y51H4A.246	11.95	5.81	0	0	-5.84	2.26	-2.59	0.00959812	NA
WBGene00013056	WAGO Class 22G	Y50E8A.14	281.93	201.13	118.79	164.55	-0.77	0.3	-2.59	0.00961035	0.117269
WBGene00015469	WAGO Class 22G	C05D2.8	2388.05	2460.11	2703.53	3085.97	0.26	0.1	2.59	0.00965599	0.117597
WBGene00047826	piRNA	21ur-1175, Y37A1B.78	164.86	98.82	66.55	62.07	-1.03	0.4	-2.59	0.0097222	0.118174
GTATTAAACGGTAAGGGCCGGC	23H-RNA	mir-5592	195.92	153.47	113.78	71.93	-0.9	0.35	-2.58	0.00981336	0.118879
WBGene00007391	WAGO Class 22G	C06H2.7	124.24	158.12	227.56	238.44	0.72	0.28	2.58	0.00981811	0.118879
WBGene00021416	WAGO Class 22G	mksr-2, Y38F2AL.2	2812.14	2532.2	3157.22	3145.09	0.24	0.09	2.58	0.00984437	0.118884
WBGene00012993	WAGO Class 22G	dmsr-3, Y48C3A.11	4212.23	4641.2	5017.77	5250.69	0.21	0.08	2.58	0.00985647	0.118884
WBGene00017310	WAGO Class 22G	F09G2.1	2293.67	2973.99	3223.05	3236.72	0.29	0.11	2.58	0.00989457	0.119115
WBGene00049328	piRNA	21ur-2818, M199.49	358.39	334.84	186.77	264.06	-0.63	0.24	-2.58	0.00994586	0.119503
WBGene00007740	ALG Class 26G	C26C6.6	21.5	5.81	0.72	0	-5.06	1.96	-2.58	0.00996415	NA
WBGene00165185	piRNA	21ur-6706, Y105C5B.626	222.2	274.38	173.89	122.18	-0.74	0.29	-2.57	0.0100258	0.120233
WBGene00171574	piRNA	21ur-8354, Y37A1B.280	462.32	351.11	288.39	260.12	-0.57	0.22	-2.57	0.0101939	0.121961
WBGene00016402	CSR Class 22G	C34D4.10	133.8	101.15	206.81	196.08	0.78	0.3	2.57	0.0102097	0.121961
WBGene00020840	ALG Class 26G	spch-3, T27A3.4	115.88	43.02	26.48	30.54	-1.48	0.58	-2.57	0.0102157	NA
WBGene00019198	WAGO Class 22G	H14E04.1, strm-1	4052.15	4658.64	4910.43	5324.58	0.23	0.09	2.57	0.0102282	0.121961
WBGene00048352	piRNA	21ur-309, Y57G11A.50	28.67	33.72	9.3	1.97	-2.42	0.95	-2.56	0.0103335	NA
WBGene00021479	WAGO Class 22G	oac-55, Y39H10A.2	82.43	115.1	186.77	167.5	0.84	0.33	2.56	0.0104314	0.124148
WBGene00010976	WAGO Class 22G	R02D5.1	2286.5	2345.01	2559.69	3007.15	0.26	0.1	2.56	0.0105183	0.124944
TGAAGACATCTCAGAAACATCGG	23H-RNA	F43E2.6	10.75	15.11	0.72	0	-4.98	1.95	-2.56	0.0105254	NA
WBGene00022608	WAGO Class 22G	madf-9, ZC416.1	2150.32	2389.19	2691.36	2692.84	0.25	0.1	2.56	0.0106088	0.125782
WBGene00018193	WAGO Class 22G	F39C12.1	7842.69	7357.09	6607.12	6755.24	-0.19	0.07	-2.55	0.0106342	0.125845
WBGene00170857	piRNA	21ur-6329, Y73F8A.874	21.5	39.53	7.87	3.94	-2.35	0.92	-2.55	0.010659	NA
WBGene00047877	piRNA	21ur-3970, Y73F8A.238	137.38	137.19	80.15	64.04	-0.92	0.36	-2.55	0.0108711	0.128393
WBGene00019087	CSR Class 22G	F59A6.5	2247.08	2298.51	2766.5	2592.34	0.24	0.09	2.55	0.0108905	0.128393
WBGene00171720	piRNA	21ur-11915, Y67A10A.276	14.34	11.63	0	0.99	-4.91	1.93	-2.54	0.0109921	NA
WBGene00011043	CSR Class 22G	R05H10.2, rbm-28	473.07	453.42	613.27	626.65	0.42	0.17	2.54	0.0109946	0.129377
WBGene00168815	piRNA	21ur-6101, H34C03.12	17.92	16.28	2.15	0.99	-3.41	1.34	-2.54	0.0110582	NA
WBGene00018572	WAGO Class 22G	F47F6.1, lin-42	514.88	555.73	386.42	397.08	-0.45	0.18	-2.54	0.011115	0.130549
WBGene00020035	CSR Class 22G	egg-5, R12E2.10	1607.96	1704.41	2148.23	1872.08	0.28	0.11	2.54	0.011242	0.131774
WBGene00046806	piRNA	21ur-526, Y73B6BL.53	189.94	216.25	140.26	90.65	-0.81	0.32	-2.53	0.011282	0.131774
WBGene00022729	WAGO Class 22G	ZK402.2	397.81	420.87	292.68	281.8	-0.51	0.2	-2.53	0.0113259	0.131774
WBGene00022729	ERGO Class 26G	ZK402.2	17.92	26.74	14.31	19.71	-0.51	0.2	-2.53	0.0113259	0.131774
WBGene00050257	piRNA	21ur-2268, Y105C5A.462	161.27	55.81	49.38	37.44	-1.32	0.52	-2.53	0.0113749	0.131774
WBGene00020564	WAGO Class 22G	T19C3.6	1827.77	1833.46	2103.86	2262.26	0.25	0.1	2.53	0.0113861	0.131774
WBGene00016162	WAGO Class 22G	C27D6.4, crh-2	232.95	230.2	325.6	359.64	0.56	0.22	2.53	0.0113995	0.131774
WBGene00016162	ALG Class 26G	C27D6.4, crh-2	2.39	0	0	0	0.56	0.22	2.53	0.0113995	0.131774
WBGene00013465	CSR Class 22G	Y67H2A.10	138.58	110.45	209.67	206.91	0.74	0.29	2.53	0.0114084	0.131774
WBGene00017291	WAGO Class 22G	F09E5.14	534	604.57	729.91	767.55	0.39	0.16	2.53	0.0114433	0.131781
WBGene00007609	WAGO Class 22G	C15C8.7	628.37	647.58	826.52	817.8	0.37	0.14	2.53	0.011451	0.131781
WBGene00011712	WAGO Class 22G	T11F9.10	12749	12245.9	10443.4	11552.7	-0.18	0.07	-2.53	0.0114789	0.13186
WBGene00047817	piRNA	21ur-4537, Y45F10D.34	428.87	453.42	336.33	282.78	-0.51	0.2	-2.53	0.0115214	0.132041
WBGene00047190	piRNA	21ur-2710, Y73F8A.181	152.91	224.39	95.89	117.25	-0.83	0.33	-2.53	0.0115367	0.132041
WBGene00050178	piRNA	21ur-5437, Y105C5A.451	72.87	53.48	24.33	22.66	-1.42	0.56	-2.52	0.0116016	NA
WBGene00021668	WAGO Class 22G	Y48G1BM.2	390.64	384.83	269.06	271.94	-0.52	0.21	-2.52	0.0116335	0.132856
MIMAT0020304	miRNA	miR-36-5p	127.82	111.61	221.84	182.28	0.76	0.3	2.52	0.0116503	0.132856
WBGene00016553	WAGO Class 22G	C40A11.10, mir-8199	399	619.68	662.64	791.2	0.51	0.2	2.52	0.0116957	0.13289
WBGene00016553	ERGO Class 26G	C40A11.10, mir-8199	112.29	165.09	206.81	185.24	0.51	0.2	2.52	0.0116957	0.13289
WBGene00170545	piRNA	21ur-6475, Y73F8A.848	193.53	176.72	126.66	77.84	-0.85	0.34	-2.52	0.0117658	0.133446
WBGene00049260	piRNA	21ur-4110, Y73F8A.361	218.62	276.7	124.51	176.37	-0.72	0.29	-2.51	0.0119663	0.135324
WBGene00047013	piRNA	21ur-4684, Y116A8B.11	203.09	199.97	135.25	102.47	-0.76	0.3	-2.51	0.0119804	0.135324
WBGene00020994	CSR Class 22G	W03F8.4	1830.16	1800.91	1526.37	1502.59	-0.26	0.1	-2.51	0.0120149	0.135324
WBGene00046716	piRNA	21ur-2016, Y105C5B.149	244.9	229.04	154.57	142.87	-0.67	0.27	-2.51	0.0120178	0.135324
WBGene00018120	ALG target 22G	F36H12.4	21.5	13.95	0.72	2.96	-3.34	1.33	-2.51	0.0121034	NA
WBGene00009793	WAGO Class 22G	F46F6.2, pkn-1	1073.96	926.61	812.92	748.83	-0.36	0.14	-2.51	0.0121054	0.13588
WBGene00017639	WAGO Class 22G	F20D6.10	818.32	955.68	1146.39	1096.64	0.34	0.14	2.51	0.0121105	0.13588
WBGene00169664	piRNA	21ur-7086, C43G2.14	41.81	43.02	8.59	15.76	-1.82	0.72	-2.51	0.0121221	NA
WBGene00022354	WAGO Class 22G	Y82E9BR.22	1563.76	1729.99	2040.17	1924.3	0.27	0.11	2.5	0.0122641	0.137358
WBGene00015305	ALG target 22G	C01G5.3	4.78	5.81	0.72	3.94	-5.74	2.29	-2.5	0.0123228	NA
WBGene00010197	WAGO Class 22G	F57C2.5	2245.89	2350.83	2635.55	2765.75	0.23	0.09	2.5	0.0124673	0.139385
WBGene00020111	CSR Class 22G	R151.8	567.44	552.25	732.06	726.17	0.38	0.15	2.5	0.0125167	0.139688
WBGene00048558	piRNA	21ur-3614, Y105C5B.363	70.48	70.92	27.19	30.54	-1.3	0.52	-2.5	0.0125281	NA
WBGene00015014	WAGO Class 22G	B0047.3, bath-24	3877.74	4240.09	4521.86	4899.92	0.21	0.09	2.49	0.0126114	0.140396
WBGene00044258	23H target 22G	Y57G11C.51	5249.16	4766.76	4172.65	4479.19	-0.21	0.08	-2.49	0.0126473	0.140396
WBGene00044258	WAGO Class 22G	Y57G11C.51	5249.16	4766.76	4172.65	4479.19	-0.21	0.08	-2.49	0.0126473	0.140396
WBGene00173523	piRNA	21ur-7061, Y105C5B.1283	11.95	16.28	1.43	0	-4.17	1.67	-2.49	0.012654	NA
WBGene00003917	WAGO Class 22G	F58B6.3, par-2	9328.8	9846.27	10490.7	11186.2	0.18	0.07	2.49	0.0126742	0.140446
WBGene00017163	CSR Class 22G	dnpp-1, F01F1.9	329.72	331.35	507.36	421.71	0.49	0.2	2.49	0.0127659	0.141213
WBGene00174623	piRNA	21ur-10252, Y40H7A.304	5.97	10.46	0	0	-5.73	2.3	-2.49	0.0128106	NA
WBGene00048500	piRNA	21ur-2965, Y116A8C.129	44.2	46.51	13.6	14.78	-1.68	0.67	-2.49	0.0128272	NA
WBGene00168908	piRNA	21ur-7756, C08F11.85	68.09	31.39	17.89	11.82	-1.73	0.7	-2.48	0.0129949	NA
WBGene00003422	CSR Class 22G	msh-6, Y47G6A.11	536.38	552.25	672.66	759.67	0.39	0.16	2.48	0.0130286	0.143274
WBGene00021966	WAGO Class 22G	Y57G7A.2	1197.01	1366.08	1519.93	1625.75	0.29	0.12	2.48	0.0130559	0.143274
WBGene00012997	CSR Class 22G	Y48C3A.18	58.54	83.71	166.02	112.32	0.97	0.39	2.48	0.0130765	0.143274
WBGene00014977	WAGO Class 22G	ZC15.4	12739.4	12142.5	10740.4	11373.4	-0.17	0.07	-2.48	0.0130767	0.143274
WBGene00000473	CSR Class 22G	cey-2, F46F11.2	486.21	644.09	792.88	727.15	0.43	0.17	2.48	0.0130819	0.143274
WBGene00008177	WAGO Class 22G	C48D1.1	453.96	454.59	579.63	635.52	0.42	0.17	2.48	0.0130945	0.143274
WBGene00045366	ERGO target 22G	Y17D7C.3	13580.5	14673.5	13237.9	14635.7	0.28	0.11	2.48	0.0131121	0.143274
WBGene00166890	piRNA	21ur-5550, F55B11.73	265.21	195.32	131.67	149.77	-0.71	0.29	-2.48	0.0132515	0.144031
WBGene00046837	piRNA	21ur-2132, Y73F8A.158	97.96	115.1	53.67	51.24	-1.02	0.41	-2.48	0.0132585	0.144031
WBGene00006436	WAGO Class 22G	ttn-1, W06H8.8	290.29	198.81	151.71	147.8	-0.71	0.29	-2.48	0.0132733	0.144031
WBGene00006436	ERGO Class 26G	ttn-1, W06H8.8	2.39	1.16	0	0	-0.71	0.29	-2.48	0.0132733	0.144031
WBGene00167305	piRNA	21ur-9600, Y37A1B.195	4.78	11.63	0	0	-5.73	2.32	-2.47	0.0133777	NA
WBGene00167147	piRNA	21ur-8192, Y105C5B.765	87.21	103.47	43.65	46.31	-1.09	0.44	-2.47	0.0134106	NA
WBGene00010265	ALG Class 26G	F58G1.3	26.28	10.46	2.15	1.97	-3.15	1.28	-2.47	0.0134849	NA
WBGene00008035	CSR Class 22G	C39E9.12	1644.99	1849.74	2111.01	2073.08	0.26	0.11	2.47	0.0134982	0.146194
WBGene00005961	WAGO Class 22G	K07C6.15, srx-70	977.2	868.48	742.08	703.51	-0.35	0.14	-2.47	0.013542	0.146194
WBGene00017159	CSR Class 22G	F01F1.2	114.68	88.36	154.57	203.96	0.82	0.33	2.47	0.0135425	0.146194
WBGene00172683	piRNA	21ur-5610, Y67A10A.295	39.42	51.16	13.6	14.78	-1.68	0.68	-2.47	0.0135919	NA
WBGene00048351	piRNA	21ur-2498, Y57G11A.49	34.64	19.76	5.72	4.93	-2.35	0.95	-2.47	0.0136463	NA
WBGene00021487	WAGO Class 22G	comt-3, Y40B10A.2	2519.46	2549.64	2913.92	2982.52	0.22	0.09	2.47	0.0136552	0.147157
WBGene00048913	piRNA	21ur-2829, C52D10.49	29.87	20.93	3.58	5.91	-2.44	0.99	-2.47	0.0136939	NA
WBGene00016469	WAGO Class 22G	C36B7.6	373.92	266.24	211.1	206.91	-0.61	0.25	-2.46	0.0137444	0.147865
WBGene00020840	ALG target 22G	spch-3, T27A3.4	71.68	41.85	20.04	19.71	-1.51	0.61	-2.46	0.0137521	NA
WBGene00004305	WAGO Class 22G	R05D11.3, ran-4	1858.83	2057.85	2272.74	2384.44	0.25	0.1	2.46	0.0137904	0.148105
WBGene00049045	piRNA	21ur-3848, T12E12.15	93.18	112.77	47.23	53.21	-1.04	0.42	-2.46	0.0138704	0.148517
WBGene00168252	piRNA	21ur-6275, Y57G11C.709	1096.66	933.59	827.95	763.61	-0.35	0.14	-2.46	0.0138761	0.148517
WBGene00169246	piRNA	21ur-6230, Y105C5B.948	112.29	69.76	40.07	41.38	-1.16	0.47	-2.46	0.0139579	NA
WBGene00045796	piRNA	21ur-3106, Y116A8A.16	439.62	363.9	223.98	317.27	-0.57	0.23	-2.45	0.0141114	0.150532
WBGene00020102	CSR Class 22G	R148.3	653.46	702.23	927.42	814.85	0.36	0.15	2.45	0.0141124	0.150532
WBGene00046011	piRNA	21ur-5342, F13G11.10	413.34	373.2	293.4	255.19	-0.52	0.21	-2.45	0.0141864	0.151065
WBGene00047441	piRNA	21ur-2592, Y105C5B.225	127.82	109.29	55.1	67	-0.96	0.39	-2.45	0.0142179	0.151143
WBGene00166588	piRNA	21ur-5722, Y57G11C.591	13.14	19.76	1.43	1.97	-3.29	1.34	-2.45	0.0142526	NA
WBGene00048515	piRNA	21ur-2311, Y105C5B.357	0	0	4.29	14.78	5.45	2.23	2.45	0.014293	NA
WBGene00010931	WAGO Class 22G	M162.5	458.73	329.02	551.01	551.77	0.49	0.2	2.45	0.0143159	0.151928
WBGene00047034	piRNA	21ur-5279, Y4C6B.13	1334.39	1046.36	924.55	943.92	-0.35	0.14	-2.45	0.014345	0.15198
WBGene00047418	piRNA	21ur-160, Y57G11C.204	23.89	49.99	11.45	6.9	-2	0.82	-2.45	0.0144125	NA
WBGene00008111	WAGO Class 22G	C46C2.3	13787.1	13090	11534	12359.6	-0.17	0.07	-2.45	0.0144412	0.152741
WBGene00002368	CSR Class 22G	K08E7.3, let-99	1937.68	2114.81	2419.44	2366.7	0.24	0.1	2.45	0.0144694	0.152781
WBGene00011498	WAGO Class 22G	T05G5.1	1284.22	1466.07	1607.95	1748.91	0.29	0.12	2.44	0.0145119	0.152973
WBGene00017100	WAGO Class 22G	E02H9.2	1474.16	1441.66	1199.34	1208.97	-0.28	0.11	-2.44	0.0146551	0.154222
WBGene00050787	piRNA	21ur-119, Y43D4A.68	430.06	517.37	334.18	347.81	-0.48	0.19	-2.44	0.0147941	0.155425
WBGene00022446	WAGO Class 22G	Y110A2AL.10	8073.25	9494	10109.2	10091.5	0.2	0.08	2.44	0.0148805	0.156071
WBGene00021925	CSR Class 22G	immp-2, Y55F3AM.8	15.53	22.09	40.07	71.93	1.57	0.64	2.43	0.0149357	NA
WBGene00022334	WAGO Class 22G	Y82E9BR.1	1788.35	2217.13	2290.63	2608.1	0.29	0.12	2.43	0.0150779	0.157551
WBGene00017186	WAGO Class 22G	F07B7.2	2735.68	2441.51	2070.23	2285.91	-0.25	0.1	-2.43	0.015097	0.157551
WBGene00021107	WAGO Class 22G	W09B7.2	2735.68	2441.51	2070.23	2285.91	-0.25	0.1	-2.43	0.015097	0.157551
MIMAT0032039	miRNA	miR-1832a-5p	10.75	16.28	1.43	0	-4.11	1.7	-2.42	0.015368	NA
WBGene00044784	WAGO Class 22G	F13H10.8	163.66	195.32	279.08	268.99	0.61	0.25	2.42	0.0153925	0.160016
WBGene00044784	ALG Class 26G	F13H10.8	0	0	0	0	0.61	0.25	2.42	0.0153925	0.160016
WBGene00003776	CSR Class 22G	F52B10.1, nmy-1	69.29	68.59	125.23	132.03	0.9	0.37	2.42	0.0154097	0.160016
WBGene00017542	ALG Class 26G	F17E9.5	33.45	8.14	3.58	11.82	-2.24	0.92	-2.42	0.0154274	NA
WBGene00021004	CSR Class 22G	sftb-2, W03F9.10	416.92	439.47	589.65	553.74	0.42	0.17	2.42	0.0154398	0.160063
WBGene00049119	piRNA	21ur-2644, Y64G10A.111	823.09	744.08	638.31	570.49	-0.37	0.15	-2.42	0.0155354	0.160789
WBGene00169650	piRNA	21ur-7385, Y73F8A.795	7.17	22.09	0	1.97	-4.02	1.66	-2.42	0.0156238	NA
WBGene00173032	piRNA	21ur-9777, Y73B6BL.230	2.39	1.16	10.02	26.6	3.36	1.39	2.42	0.015731	NA
WBGene00002226	CSR Class 22G	C41G7.2, klp-16	4607.65	4538.89	5336.21	5069.39	0.19	0.08	2.41	0.0157524	0.162505
WBGene00046572	piRNA	21ur-4027, Y57G11C.128	267.6	224.39	150.99	164.55	-0.64	0.27	-2.41	0.015753	0.162505
WBGene00022216	WAGO Class 22G	fbxa-16, Y73B3A.14	264.01	240.66	156.72	171.44	-0.62	0.26	-2.41	0.0160117	0.164902
WBGene00047514	piRNA	21ur-1589, Y105C5B.232	41.81	51.16	10.02	19.71	-1.66	0.69	-2.41	0.0160281	NA
WBGene00011292	CSR Class 22G	allo-1, R102.5	215.03	284.84	345.63	389.2	0.55	0.23	2.41	0.0160567	0.165094
WBGene00046389	piRNA	21ur-492, Y73F8A.111	303.43	369.71	235.43	223.66	-0.55	0.23	-2.41	0.0160959	0.165096
WBGene00018647	WAGO Class 22G	F49F1.7	3723.63	3623.9	2957.57	3352	-0.22	0.09	-2.41	0.0161442	0.165096
WBGene00168604	piRNA	21ur-5567, Y57G11C.730	302.24	368.55	258.33	180.31	-0.61	0.25	-2.41	0.0161584	0.165096
WBGene00050862	piRNA	21ur-5288, Y105C5B.610	1159.98	981.26	828.66	871.01	-0.33	0.14	-2.41	0.0161622	0.165096
WBGene00001912	WAGO Class 22G	his-38, K03A1.6	138.58	176.72	232.57	264.06	0.65	0.27	2.4	0.0162059	0.165274
WBGene00019816	WAGO Class 22G	nhr-204, R02C2.4	5298.14	6242.13	6388.86	7059.7	0.22	0.09	2.4	0.0162565	0.165521
WBGene00018359	ALG Class 26G	F42G8.8	8.36	6.98	0	0	-5.63	2.35	-2.4	0.0163271	NA
WBGene00013644	WAGO Class 22G	Y105C5A.25	798.01	819.65	621.14	649.32	-0.35	0.15	-2.4	0.016417	0.166454
WBGene00013644	ERGO Class 26G	Y105C5A.25	74.07	69.76	57.96	72.91	-0.35	0.15	-2.4	0.016417	0.166454
WBGene00049548	piRNA	21ur-5179, Y64G10A.123	7.17	8.14	0	0	-5.63	2.35	-2.4	0.0164301	NA
WBGene00012710	WAGO Class 22G	Y39C12A.9	838.62	962.65	1104.88	1141.97	0.32	0.13	2.4	0.0164557	0.166454
WBGene00000257	CSR Class 22G	bmk-1, F23B12.8	1085.91	1180.06	1436.21	1331.15	0.29	0.12	2.4	0.0164808	0.166454
WBGene00000257	ALG Class 26G	bmk-1, F23B12.8	0	1.16	7.16	1.97	0.29	0.12	2.4	0.0164808	0.166454
MIMAT0000699	miRNA	miR-357-3p	148.13	103.47	52.24	76.85	-0.97	0.4	-2.4	0.0165222	0.166603
WBGene00001831	CSR Class 22G	F58A4.3, hcp-3	2237.53	2417.1	2801.57	2647.51	0.23	0.1	2.4	0.0165611	0.166727
WBGene00001830	CSR Class 22G	hcp-2, T06E4.1	867.29	830.11	1033.32	1074.97	0.31	0.13	2.39	0.0166281	0.166962
WBGene00019577	WAGO Class 22G	K09E3.6, lido-6	483.82	461.56	314.15	372.44	-0.46	0.19	-2.39	0.0166376	0.166962
WBGene00021458	WAGO Class 22G	Y39G10AL.1	721.55	801.05	978.22	938.01	0.33	0.14	2.39	0.0167464	0.167785
WBGene00010920	ALG Class 26G	M117.4	31.06	13.95	3.58	3.94	-2.58	1.08	-2.39	0.0168548	NA
WBGene00047176	piRNA	21ur-991, Y51H4A.139	10.75	4.65	0	0	-5.64	2.36	-2.39	0.0168601	NA
WBGene00019008	CSR Class 22G	F57C9.1, pdxk-1	457.54	568.52	711.3	651.29	0.41	0.17	2.39	0.0169135	0.169189
WBGene00008345	CSR Class 22G	C56A3.6	169.64	151.14	249.03	245.34	0.62	0.26	2.39	0.017064	0.170423
WBGene00010100	23H target 22G	F55C9.3	855.35	878.94	1029.75	1126.2	0.31	0.13	2.38	0.0171983	0.170947
WBGene00010100	WAGO Class 22G	F55C9.3	855.35	878.94	1029.75	1126.2	0.31	0.13	2.38	0.0171983	0.170947
WBGene00010100	ERGO Class 26G	F55C9.3	186.36	275.54	277.65	338.94	0.31	0.13	2.38	0.0171983	0.170947
WBGene00016346	WAGO Class 22G	C33E10.2, fbxa-120	9228.45	8325.56	7644.73	7848.93	-0.18	0.08	-2.38	0.0172532	0.171222
WBGene00049555	piRNA	21ur-2308, Y105C5A.407	88.4	72.08	35.06	37.44	-1.15	0.48	-2.38	0.0173005	NA
WBGene00006713	ALG target 22G	R01H2.6, ubc-18	0	1.16	0	5.91	0.49	0.21	2.38	0.017442	0.172689
WBGene00012623	WAGO Class 22G	fbxa-149, Y38H6C.10	10457.7	10412.5	9107.42	9564.35	-0.16	0.07	-2.38	0.0174561	0.172689
WBGene00003085	CSR Class 22G	ccar-1, Y37A1B.1	1130.11	1088.22	1461.25	1263.16	0.3	0.13	2.38	0.0175	0.17285
WBGene00021671	WAGO Class 22G	Y48G1BM.6	13830.1	13772.5	11931.2	12783.3	-0.16	0.07	-2.38	0.0175393	0.172948
WBGene00017942	ERGO target 22G	F31A9.4, fbxc-37	1093.08	1099.84	896.64	997.13	-0.66	0.28	-2.37	0.017565	0.172948
WBGene00019683	CSR Class 22G	K12H6.2	59.73	44.18	22.18	13.79	-1.52	0.64	-2.37	0.0175879	NA
WBGene00044447	ALG target 22G	ZK688.10	11.95	8.14	2.86	2.96	-3.31	1.4	-2.37	0.0176211	NA
WBGene00001426	ALG target 22G	F36H1.1, fkb-1	0	1.16	4.29	0.99	0.7	0.29	2.37	0.0176509	0.173521
WBGene00012894	CSR Class 22G	tbc-17, Y46G5A.1	671.38	555.73	783.58	804.01	0.37	0.16	2.37	0.0177531	0.174253
WBGene00006571	CSR Class 22G	tim-1, Y75B8A.22	783.67	785.93	1170.72	866.08	0.38	0.16	2.37	0.0178613	0.174989
WBGene00049422	piRNA	21ur-2414, Y105C5B.447	54.95	22.09	14.31	3.94	-2.05	0.86	-2.37	0.0178776	NA
MIMAT0020771	miRNA	miR-44-5p	1402.49	2027.62	2619.09	2647.51	0.62	0.26	2.37	0.017884	0.174989
WBGene00045949	piRNA	21ur-1113, Y57G11C.84	96.76	80.22	48.66	32.52	-1.12	0.47	-2.37	0.0179062	NA
WBGene00018436	WAGO Class 22G	F45C12.5, fbxb-11	581.78	482.49	414.33	365.55	-0.45	0.19	-2.37	0.017959	0.175044
WBGene00047664	piRNA	21ur-1291, Y105C5B.253	430.06	380.18	312	259.13	-0.5	0.21	-2.37	0.0179821	0.175044
WBGene00174099	piRNA	21ur-6216, Y45F10D.133	22.7	10.46	2.86	0	-3.44	1.45	-2.37	0.0179864	NA
WBGene00050670	piRNA	21ur-1061, Y105C5A.497	740.67	683.62	617.56	418.75	-0.45	0.19	-2.37	0.0179877	0.175044
WBGene00048565	piRNA	21ur-3471, Y57G11C.298	157.69	155.79	57.96	111.34	-0.9	0.38	-2.36	0.0180536	0.175044
WBGene00019959	WAGO Class 22G	R08E3.3	1136.08	1032.41	871.6	878.89	-0.31	0.13	-2.36	0.0180599	0.175044
WBGene00004175	WAGO Class 22G	pqn-96, ZK1236.6	997.51	1021.95	1240.13	1222.76	0.29	0.12	2.36	0.0180613	0.175044
WBGene00022785	CSR Class 22G	ZK652.6	1063.21	1024.27	1255.16	1286.81	0.28	0.12	2.36	0.0180849	0.175044
WBGene00004031	CSR Class 22G	pis-1, T13F2.3	775.31	723.15	975.36	905.49	0.33	0.14	2.36	0.0181707	0.175537
WBGene00047641	piRNA	21ur-367, Y73F8A.213	280.74	251.13	182.48	169.47	-0.59	0.25	-2.36	0.0181918	0.175537
WBGene00166657	piRNA	21ur-8082, T06A10.51	3.58	11.63	0	0	-5.62	2.38	-2.36	0.0183828	NA
WBGene00175005	piRNA	21ur-9402, Y64G10A.353	3.58	11.63	0	0	-5.62	2.38	-2.36	0.0183828	NA
WBGene00013180	WAGO Class 22G	cutl-10, Y53H1B.1	715.58	647.58	465.14	568.52	-0.4	0.17	-2.36	0.0185134	0.178359
WBGene00004703	ALG target 22G	C33H5.12, rsp-6	3.58	1.16	0	0.99	0.42	0.18	2.35	0.0185412	0.178359
WBGene00048616	piRNA	21ur-2894, C47A4.48	22.7	5.81	0	1.97	-3.98	1.69	-2.35	0.0185757	NA
WBGene00021277	CSR Class 22G	Y23H5B.6	1266.3	1212.62	1448.37	1540.03	0.27	0.11	2.35	0.0185824	0.178482
WBGene00165943	piRNA	21ur-8831, Y105C5A.575	59.73	93.01	39.36	24.63	-1.25	0.53	-2.35	0.0186174	NA
WBGene00017774	CSR Class 22G	F25B5.2, nop-1	1170.73	1197.5	1478.43	1381.4	0.27	0.12	2.35	0.0187311	0.179635
WBGene00001568	CSR Class 22G	F32H2.1, snpc-4	593.73	694.09	898.08	766.57	0.37	0.16	2.35	0.0188304	0.180312
WBGene00169043	piRNA	21ur-6318, Y37A1B.225	52.56	23.25	13.6	5.91	-1.94	0.82	-2.35	0.0188513	NA
WBGene00045255	WAGO Class 22G	nhr-146, Y41D4B.27	1630.66	1562.57	1849.11	1934.15	0.24	0.1	2.35	0.0189303	0.180456
WBGene00012150	CSR Class 22G	syx-17, VF39H2L.1	81.23	82.55	152.42	135.97	0.82	0.35	2.35	0.018931	0.180456
WBGene00007784	CSR Class 22G	C27H6.2, ruvb-1	571.03	567.36	744.94	713.36	0.36	0.15	2.35	0.0189928	0.180456
WBGene00046406	piRNA	21ur-5338, Y67A10A.40	168.44	153.47	101.61	86.71	-0.77	0.33	-2.35	0.019007	0.180456
WBGene00014082	WAGO Class 22G	ZK795.2	403.78	474.35	555.3	618.77	0.42	0.18	2.35	0.0190181	0.180456
WBGene00014082	ALG Class 26G	ZK795.2	1.19	2.33	0.72	8.87	0.42	0.18	2.35	0.0190181	0.180456
WBGene00001598	CSR Class 22G	glh-1, T21G5.3	2776.3	2903.07	3293.9	3240.67	0.2	0.09	2.34	0.0191864	0.18156
WBGene00012551	CSR Class 22G	cec-7, Y37D8A.11	455.15	633.63	698.42	763.61	0.42	0.18	2.34	0.0191923	0.18156
WBGene00021531	WAGO Class 22G	Y42G9A.1	3831.15	3795.97	4209.86	4497.91	0.19	0.08	2.34	0.0193693	0.182958
WBGene00022036	WAGO Class 22G	Y65B4BL.4	1507.61	1513.74	1776.11	1802.12	0.24	0.1	2.34	0.0194871	0.183597
WBGene00018606	WAGO Class 22G	F48E3.6	837.43	1074.27	1182.88	1225.72	0.33	0.14	2.34	0.0194954	0.183597
WBGene00168917	piRNA	21ur-6066, Y105C5A.803	162.47	144.17	98.04	77.84	-0.8	0.34	-2.34	0.0195426	0.183676
WBGene00003119	CSR Class 22G	mac-1, Y48C3A.7	733.5	617.35	919.54	812.88	0.36	0.15	2.33	0.0195624	0.183676
WBGene00004980	CSR Class 22G	B0464.5, spk-1	710.8	787.1	1033.32	869.04	0.35	0.15	2.33	0.0196097	0.183845
WBGene00050752	piRNA	21ur-2754, F02H6.33	35.84	23.25	10.02	1.97	-2.26	0.97	-2.33	0.0196478	NA
WBGene00019125	WAGO Class 22G	ddl-1, F59E12.10	2140.76	2339.2	2614.8	2612.04	0.22	0.1	2.33	0.0196987	0.184403
WBGene00045981	piRNA	21ur-992, Y73F8A.78	680.93	751.06	581.07	526.15	-0.37	0.16	-2.33	0.0197961	0.185039
WBGene00001563	CSR Class 22G	C05C8.4, gei-6	1105.02	1103.33	1429.05	1262.17	0.29	0.12	2.33	0.0198902	0.185372
WBGene00010195	CSR Class 22G	F57C2.3, pot-2	91.99	115.1	168.88	178.34	0.74	0.32	2.33	0.0199321	0.185372
WBGene00045994	piRNA	21ur-5323, R05A10.13	1502.83	1311.44	1200.77	1098.61	-0.29	0.12	-2.33	0.0199336	0.185372
WBGene00047376	piRNA	21ur-1065, Y41E3.88	80.04	116.26	51.52	44.34	-1.03	0.44	-2.33	0.019946	NA
WBGene00017188	WAGO Class 22G	F07B7.7	917.47	832.44	651.91	730.11	-0.34	0.15	-2.33	0.0199499	0.185372
WBGene00046429	piRNA	21ur-5109, Y105C5B.116	456.35	497.6	340.62	364.56	-0.44	0.19	-2.33	0.0200325	0.185864
WBGene00012138	ALG Class 26G	T28F4.3	29.87	17.44	4.29	4.93	-2.36	1.02	-2.33	0.0200649	NA
WBGene00046801	piRNA	21ur-5227, Y57G11A.24	59.73	37.2	10.73	21.68	-1.6	0.69	-2.32	0.0201061	NA
WBGene00170174	piRNA	21ur-7999, Y105C5A.909	109.91	65.11	47.23	30.54	-1.16	0.5	-2.32	0.0201116	NA
MIMAT0020306	miRNA	miR-39-5p	1855.25	2205.5	2574.72	2290.83	0.26	0.11	2.32	0.0201798	0.186953
WBGene00012792	WAGO Class 22G	Y43D4A.6	7719.64	8570.87	8974.32	9453.01	0.18	0.08	2.32	0.0204445	0.189126
WBGene00000685	WAGO Class 22G	col-111, F29B9.9	4386.65	4291.25	4745.85	5134.42	0.19	0.08	2.32	0.020559	0.189906
WBGene00013983	CSR Class 22G	ZK512.2	231.76	196.48	334.9	291.65	0.55	0.24	2.31	0.0206699	0.19065
WBGene00012082	WAGO Class 22G	T27C5.9	45144.7	43886.8	47952.9	50032.8	0.14	0.06	2.31	0.0207399	0.191014
MIMAT0000003	miRNA	miR-1-3p	142846	133486	75556.4	107588	-0.59	0.26	-2.31	0.0209253	0.192439
WBGene00002225	CSR Class 22G	klp-15, M01E11.6	3852.65	3844.8	4540.47	4229.91	0.19	0.08	2.31	0.020971	0.192577
WBGene00168117	piRNA	21ur-5815, T23G4.79	43.01	25.58	10.73	7.88	-1.87	0.81	-2.31	0.021048	NA
WBGene00010491	WAGO Class 22G	K02B7.3	603.28	573.17	722.04	780.36	0.35	0.15	2.31	0.0210732	0.19295
WBGene00010491	ALG Class 26G	K02B7.3	0	0	0	0.99	0.35	0.15	2.31	0.0210732	0.19295
WBGene00018943	WAGO Class 22G	dgn-2, F56C3.6	498.16	334.84	295.54	279.83	-0.53	0.23	-2.31	0.0211098	0.193004
WBGene00005308	WAGO Class 22G	H27D07.6, srh-87	318.96	376.69	474.44	471.96	0.44	0.19	2.31	0.0211615	0.193027
WBGene00001999	CSR Class 22G	F42A6.7, hrpa-1	704.83	747.57	968.2	857.21	0.33	0.14	2.3	0.0212138	0.193027
WBGene00004775	CSR Class 22G	sep-1, Y47G6A.12	1121.75	1231.22	1410.44	1428.69	0.27	0.12	2.3	0.0212476	0.193027
WBGene00018837	WAGO Class 22G	F54G2.1	1290.19	1099.84	980.37	955.74	-0.3	0.13	-2.3	0.0212558	0.193027
WBGene00046796	piRNA	21ur-2343, Y57G11A.23	15.53	31.39	1.43	6.9	-2.54	1.1	-2.3	0.0212669	NA
WBGene00006750	WAGO Class 22G	T10A3.1, unc-10	4774.9	5371.33	5611.72	6006.41	0.2	0.08	2.3	0.0212879	0.193027
WBGene00049792	piRNA	21ur-4402, Y105C5A.428	160.08	143	77.28	98.53	-0.79	0.34	-2.3	0.0212969	0.193027
WBGene00050566	piRNA	21ur-4259, Y105C5B.575	9.56	11.63	0.72	0	-4.69	2.04	-2.3	0.0213751	NA
WBGene00016871	WAGO Class 22G	C52B11.2, inso-1	5772.41	6130.52	6472.58	7008.47	0.18	0.08	2.3	0.0214821	0.194423
WBGene00048202	piRNA	21ur-3975, Y105C5B.317	605.67	566.2	470.86	417.77	-0.4	0.17	-2.3	0.0215207	0.194492
MIMAT0020324	miRNA	miR-85-5p	0	0	8.59	7.88	5.25	2.28	2.3	0.0215285	NA
WBGene00021931	WAGO Class 22G	Y55F3AM.14	11958.2	11576.3	12830.7	13294.7	0.15	0.07	2.3	0.0216008	0.194899
WBGene00046071	piRNA	21ur-2883, F38C2.11	223.39	286.01	175.32	157.65	-0.61	0.27	-2.3	0.0216278	0.194899
WBGene00048257	piRNA	21ur-4753, Y40H7A.85	8.36	5.81	0	0	-5.52	2.41	-2.29	0.021861	NA
WBGene00049046	piRNA	21ur-1983, VY10G11R.21	21.5	20.93	2.86	4.93	-2.47	1.08	-2.29	0.0219467	NA
WBGene00006939	WAGO Class 22G	C01G12.4, wee-1.2	2066.69	2593.82	2644.13	2962.81	0.27	0.12	2.29	0.0220483	0.198403
WBGene00050070	piRNA	21ur-2191, C06E7.40	93.18	79.06	36.5	46.31	-1.06	0.46	-2.29	0.0221122	NA
ATGATGGCGTGGAAGAAGTTGAT	23H-RNA	Y57G11C.1145_hairpin	5.97	8.14	0	0	-5.51	2.41	-2.29	0.0221472	NA
WBGene00018704	WAGO Class 22G	F52E4.8, ztf-13	344.05	368.55	458.7	502.51	0.43	0.19	2.29	0.0221721	0.199231
WBGene00047021	piRNA	21ur-108, F52B11.16	59.73	45.34	20.04	19.71	-1.4	0.61	-2.29	0.0222004	NA
WBGene00014169	ALG Class 26G	ZK945.7	9.56	4.65	0	0	-5.52	2.42	-2.29	0.0222212	NA
WBGene00171008	piRNA	21ur-13350, Y73F8A.882	9.56	4.65	0	0	-5.52	2.42	-2.29	0.0222212	NA
WBGene00020596	CSR Class 22G	oga-1, T20B5.3	41.81	53.48	14.31	19.71	-1.49	0.65	-2.29	0.0222445	NA
WBGene00011071	CSR Class 22G	R06F6.8	549.53	689.44	764.97	838.49	0.37	0.16	2.28	0.0223401	0.200454
WBGene00022167	CSR Class 22G	Y71H2AM.2	107.52	111.61	70.13	39.41	-0.99	0.43	-2.28	0.0224454	0.200858
WBGene00011562	CSR Class 22G	sas-7, T07C4.10	2089.39	2061.33	2505.31	2329.26	0.22	0.1	2.28	0.0224492	0.200858
WBGene00010906	ALG target 22G	M88.3	2.39	3.49	4.29	3.94	-4.79	2.1	-2.28	0.0226803	NA
WBGene00009458	ALG Class 26G	F36A2.11	27.48	4.65	2.15	0.99	-3.32	1.46	-2.28	0.0227617	NA
WBGene00017182	WAGO Class 22G	F02E11.4	4305.41	5121.36	5387.02	5502.92	0.21	0.09	2.28	0.0227795	0.203352
WBGene00019266	WAGO Class 22G	H35N09.2	3018.81	3008.87	3388.36	3499.8	0.19	0.08	2.28	0.0227928	0.203352
GATGATGGCGTGGAAGAAGTTG	23H-RNA	Y57G11C.1145_hairpin	111.1	84.87	47.95	51.24	-0.98	0.43	-2.28	0.0228971	NA
WBGene00168033	piRNA	21ur-6816, ZK616.38	23.89	25.58	7.16	2.96	-2.26	0.99	-2.27	0.022948	NA
WBGene00003904	CSR Class 22G	C17E4.5, pabp-2	925.83	921.96	749.23	741.93	-0.31	0.14	-2.27	0.0230917	0.205726
WBGene00013441	CSR Class 22G	xpb-1, Y66D12A.15	372.72	329.02	457.27	490.68	0.43	0.19	2.27	0.0232056	0.206415
WBGene00019360	WAGO Class 22G	K03E5.1, neto-1	1267.49	1091.7	1461.97	1399.13	0.28	0.12	2.27	0.0232348	0.206415
WBGene00170103	piRNA	21ur-7310, Y105C5A.900	91.99	43.02	25.05	29.56	-1.31	0.58	-2.27	0.0234544	NA
WBGene00012835	CSR Class 22G	ani-3, Y43F8C.14	174.41	197.65	261.91	288.69	0.56	0.25	2.27	0.0235067	0.208535
WBGene00046238	piRNA	21ur-5086, Y73F8A.99	26.28	49.99	12.88	9.85	-1.74	0.77	-2.26	0.0235452	NA
WBGene00001632	CSR Class 22G	gly-7, Y46H3A.6	255.65	303.45	377.12	402.99	0.48	0.21	2.26	0.0235614	0.208725
WBGene00048100	piRNA	21ur-4162, Y105C5B.306	176.8	259.27	112.35	155.68	-0.71	0.31	-2.26	0.0238354	0.210854
WBGene00167356	piRNA	21ur-6012, H01M01.3	16.72	17.44	0.72	3.94	-2.94	1.3	-2.26	0.0239511	NA
WBGene00047460	piRNA	21ur-4467, Y67A10A.61	145.74	136.03	95.89	60.1	-0.84	0.37	-2.26	0.0239772	0.211688
WBGene00047735	piRNA	21ur-1311, Y105C5B.260	480.24	456.91	367.1	328.11	-0.43	0.19	-2.26	0.0239972	0.211688
WBGene00168133	piRNA	21ur-5980, Y73F8A.699	121.85	96.5	58.68	57.15	-0.91	0.4	-2.26	0.0240443	0.211792
WBGene00015134	CSR Class 22G	B0304.2	250.87	208.11	329.89	327.12	0.52	0.23	2.26	0.0240764	0.211792
WBGene00013700	ALG Class 26G	Y106G6D.3	22.7	11.63	0	3.94	-3.21	1.42	-2.26	0.0240784	NA
WBGene00004914	CSR Class 22G	snr-1, Y116A8C.42	261.62	224.39	333.47	355.69	0.5	0.22	2.25	0.0241479	0.212122
WBGene00016703	WAGO Class 22G	C46A5.8, rdl-1	433.65	480.16	576.77	616.8	0.38	0.17	2.25	0.0241828	0.212132
WBGene00049857	piRNA	21ur-3555, H25K10.50	144.55	159.28	90.88	89.66	-0.75	0.33	-2.25	0.0243218	0.213053
WBGene00048829	piRNA	21ur-3606, Y9C9A.33	944.95	805.7	754.24	603.01	-0.36	0.16	-2.25	0.0244112	0.213138
WBGene00017760	CSR Class 22G	F23H11.4	323.74	381.34	464.42	487.73	0.43	0.19	2.25	0.0244184	0.213138
WBGene00013736	WAGO Class 22G	gtf-2A2, Y111B2A.13	1788.35	1776.49	2043.03	2120.37	0.22	0.1	2.25	0.0244334	0.213138
WBGene00170922	piRNA	21ur-7231, Y64G10A.274	112.29	65.11	45.8	37.44	-1.09	0.48	-2.25	0.0244504	NA
WBGene00050236	piRNA	21ur-3079, Y73F8A.444	11.95	2.33	0	0	-5.53	2.46	-2.25	0.0245333	NA
WBGene00018137	WAGO Class 22G	bath-41, F37A4.9	1426.38	1391.66	1651.6	1679.94	0.24	0.11	2.25	0.0246507	0.214735
WBGene00173095	piRNA	21ur-7072, Y105C5B.1255	70.48	67.43	34.35	26.6	-1.17	0.52	-2.25	0.0246912	NA
WBGene00049093	piRNA	21ur-4250, K02B2.14	77.65	83.71	42.94	33.5	-1.07	0.48	-2.24	0.024863	NA
WBGene00172982	piRNA	21ur-5513, Y7A9A.72	344.05	353.44	253.32	245.34	-0.48	0.22	-2.24	0.0248887	0.215985
WBGene00017422	WAGO Class 22G	F13C5.1	1272.27	1600.93	1713.14	1780.44	0.28	0.13	2.24	0.0248937	0.215985
WBGene00166094	piRNA	21ur-5614, Y105C5A.590	186.36	304.61	169.6	135.97	-0.68	0.3	-2.24	0.0248975	0.215985
WBGene00050294	piRNA	21ur-4279, Y37A1B.142	240.12	195.32	153.14	124.15	-0.65	0.29	-2.24	0.0250016	0.216588
WBGene00046600	piRNA	21ur-4062, Y105C5B.137	31.06	19.76	7.16	3.94	-2.18	0.97	-2.24	0.0250192	NA
WBGene00012345	ALG Class 26G	W08E3.4	33.45	38.37	6.44	14.78	-1.78	0.8	-2.24	0.0250443	NA
WBGene00017070	WAGO Class 22G	D2096.2, praf-3	407.37	377.85	515.95	521.23	0.4	0.18	2.24	0.0250791	0.21696
WBGene00167469	piRNA	21ur-5985, C27H2.69	219.81	218.57	126.66	157.65	-0.63	0.28	-2.24	0.0252655	0.218162
WBGene00047779	piRNA	21ur-4737, Y105C5B.264	495.77	516.21	358.51	403.97	-0.41	0.18	-2.24	0.0252876	0.218162
WBGene00012851	WAGO Class 22G	Y44A6C.2	1053.66	1354.46	1422.61	1552.84	0.3	0.14	2.23	0.0254331	0.218961
WBGene00003638	WAGO Class 22G	nhr-48, ZK662.3	1705.92	1534.67	1263.75	1432.63	-0.27	0.12	-2.23	0.02545	0.218961
WBGene00018811	WAGO Class 22G	F54D11.1, pmt-2	174.41	169.74	113.78	97.55	-0.7	0.31	-2.23	0.02566	0.220465
WBGene00050233	piRNA	21ur-5305, Y105C5B.529	58.54	58.13	20.75	27.59	-1.28	0.57	-2.23	0.0257466	NA
WBGene00015105	WAGO Class 22G	B0280.10, pot-1	800.4	739.43	945.31	956.73	0.3	0.14	2.23	0.0257921	0.220877
WBGene00167077	piRNA	21ur-6407, Y57G11C.631	7.17	23.25	0	2.96	-3.47	1.56	-2.23	0.0258258	NA
WBGene00174294	piRNA	21ur-5791, Y57G11B.214	155.3	124.4	80.15	81.78	-0.79	0.35	-2.23	0.0258437	0.220877
MIMAT0000019	miRNA	miR-48-5p	381189	312850	224596	278012	-0.47	0.21	-2.23	0.0259033	0.220877
WBGene00007600	WAGO Class 22G	C15C6.1	1993.82	1914.84	2165.4	2414.98	0.23	0.1	2.23	0.0259068	0.220877
WBGene00000518	WAGO Class 22G	C05H8.1, ckk-1	6692.27	6912.97	7489.45	7683.4	0.16	0.07	2.23	0.0259284	0.220877
WBGene00003797	CSR Class 22G	F53F10.5, npp-11	367.94	429.01	587.51	481.81	0.43	0.19	2.23	0.0259322	0.220877
WBGene00022458	CSR Class 22G	prp-31, Y110A7A.8	304.63	317.4	437.23	406.93	0.44	0.2	2.23	0.0259545	0.220877
WBGene00003182	WAGO Class 22G	mef-2, W10D5.1	4483.41	4529.59	5000.6	5136.39	0.17	0.08	2.23	0.0260693	0.221553
WBGene00016765	ALG Class 26G	C49C8.1	76.46	74.41	27.19	42.37	-1.13	0.51	-2.22	0.0261002	NA
WBGene00174694	piRNA	21ur-7757, Y105C5B.1389	181.58	111.61	88.73	75.87	-0.83	0.37	-2.22	0.0261701	0.22211
WBGene00017185	WAGO Class 22G	F07B7.1	7131.89	6623.47	5903.68	6305.95	-0.17	0.08	-2.22	0.0262473	0.222164
WBGene00021106	WAGO Class 22G	W09B7.1	7131.89	6623.47	5903.68	6305.95	-0.17	0.08	-2.22	0.0262473	0.222164
WBGene00012608	ALG target 22G	hphd-1, Y38F1A.6	0	0	0.72	0	-1.8	0.81	-2.22	0.0264031	NA
WBGene00050452	piRNA	21ur-3299, C35D6.56	35.84	80.22	23.61	20.69	-1.39	0.63	-2.22	0.0264698	NA
WBGene00164985	WAGO Class 22G	ZK1010.10	1120.55	1185.88	1292.37	1508.5	0.28	0.13	2.22	0.0265027	0.223796
WBGene00047666	piRNA	21ur-93, Y41E3.100	193.53	125.56	100.18	84.74	-0.78	0.35	-2.22	0.026534	0.223796
WBGene00013615	WAGO Class 22G	fbxa-110, Y102A5C.8	1375.01	1357.95	1061.23	1206.01	-0.27	0.12	-2.22	0.0265472	0.223796
WBGene00012159	WAGO Class 22G	VY10G11R.1	277.15	241.83	179.62	171.44	-0.56	0.25	-2.22	0.0266066	0.223996
WBGene00019003	WAGO Class 22G	F57B10.5, tmed-3	756.2	816.16	930.28	1014.86	0.31	0.14	2.22	0.0267092	0.224558
WBGene00167196	piRNA	21ur-6405, Y73F8A.644	2391.63	1856.71	1738.9	1777.49	-0.27	0.12	-2.21	0.0269044	0.225778
WBGene00022413	WAGO Class 22G	Y102A11A.3	809.95	599.91	557.45	512.36	-0.4	0.18	-2.21	0.0269263	0.225778
WBGene00165630	piRNA	21ur-6417, Y105C5A.554	11.95	12.79	0	1.97	-3.77	1.71	-2.21	0.0270274	NA
WBGene00009412	ALG target 22G	F35E2.5	35.84	9.3	2.15	10.84	-2.13	0.97	-2.21	0.0270462	NA
MIMAT0000039	miRNA	miR-67-3p	75.26	130.21	54.39	49.27	-0.99	0.45	-2.21	0.0270839	0.226796
WBGene00045855	piRNA	21ur-4682, H04M03.16	115.88	118.59	30.06	83.75	-1.06	0.48	-2.21	0.0272195	0.227628
WBGene00172408	piRNA	21ur-6388, Y57G11C.968	205.47	129.05	108.06	86.71	-0.78	0.35	-2.21	0.0273953	0.228793
WBGene00046584	piRNA	21ur-205, Y57G11A.20	65.7	52.32	29.34	18.72	-1.29	0.58	-2.2	0.0275623	NA
WBGene00009922	CSR Class 22G	F52B5.3	1390.54	1449.79	1690.24	1657.28	0.24	0.11	2.2	0.027653	0.230505
WBGene00000864	WAGO Class 22G	cya-2, F59H6.7	396.61	333.67	249.74	273.91	-0.48	0.22	-2.2	0.0276739	0.230505
WBGene00012192	CSR Class 22G	W02A11.1	512.49	461.56	600.39	658.18	0.37	0.17	2.2	0.0277928	0.231189
WBGene00017405	WAGO Class 22G	bath-31, F12E12.4	2776.3	3330.92	3521.46	3588.48	0.22	0.1	2.2	0.027862	0.231457
WBGene00050444	piRNA	21ur-4180, Y37A1A.67	27.48	2.33	2.15	0	-3.7	1.68	-2.2	0.0281044	NA
MIMAT0000052	miRNA	miR-80-5p	1226.88	940.56	860.86	865.1	-0.33	0.15	-2.2	0.0281582	0.233609
WBGene00017317	CSR Class 22G	attf-2, F09G2.9	525.63	484.81	676.96	618.77	0.36	0.16	2.19	0.028316	0.234608
WBGene00006803	ERGO target 22G	K11C4.3, unc-70	0	0	0	0	-0.34	0.15	-2.19	0.0283717	0.234616
WBGene00003410	CSR Class 22G	F21G4.2, mrp-4	1122.94	1318.42	1476.28	1463.18	0.27	0.12	2.19	0.0283918	0.234616
WBGene00173492	piRNA	21ur-9575, H25K10.129	0	0	9.3	5.91	5.14	2.34	2.19	0.0284761	NA
WBGene00000970	CSR Class 22G	C17G10.8, dhs-6	76.46	81.38	146.7	125.13	0.79	0.36	2.19	0.02849	0.234886
WBGene00049504	piRNA	21ur-5329, Y57G11A.68	188.75	151.14	93.74	114.3	-0.71	0.32	-2.19	0.0284994	0.234886
WBGene00007977	ALG Class 26G	C36B1.10, gska-3	27.48	10.46	14.31	10.84	-3.78	1.73	-2.18	0.0289038	NA
WBGene00170027	piRNA	21ur-5565, Y116A8C.331	82.43	75.57	39.36	37.44	-1.04	0.48	-2.18	0.0289279	NA
WBGene00012868	CSR Class 22G	tbc-9, Y45F10A.6	356	374.37	509.51	459.15	0.41	0.19	2.18	0.0289681	0.238436
WBGene00007287	CSR Class 22G	C04A11.3, gck-4	58.54	104.64	173.89	121.19	0.86	0.39	2.18	0.0291471	0.239595
WBGene00049907	piRNA	21ur-3840, Y105C5B.500	25.09	31.39	7.16	7.88	-1.91	0.88	-2.18	0.0291495	NA
WBGene00046692	piRNA	21ur-2123, Y57G11C.134	234.15	211.6	143.84	151.74	-0.59	0.27	-2.18	0.0292525	0.240146
TGCCGATGTTTCTGAGATGTCTT	23H-RNA	F43E2.6	14.34	25.58	0.72	5.91	-2.65	1.22	-2.18	0.0293997	NA
WBGene00022709	ALG Class 26G	ZK354.8	33.45	16.28	17.89	3.94	-5.39	2.48	-2.18	0.0295307	NA
WBGene00013799	WAGO Class 22G	athp-3, Y116A8C.22	2081.03	2365.94	1827.64	1962.73	-0.23	0.11	-2.17	0.0296382	0.242745
WBGene00017885	WAGO Class 22G	dip-2, F28B3.4	1584.07	1819.51	1990.79	2017.9	0.24	0.11	2.17	0.0296464	0.242745
WBGene00046280	piRNA	21ur-3189, C52D10.21	127.82	110.45	64.4	69.96	-0.83	0.38	-2.17	0.0297345	0.243148
WBGene00022037	CSR Class 22G	acs-13, Y65B4BL.5	234.15	172.07	281.23	313.33	0.55	0.25	2.17	0.0298243	0.24347
WBGene00007926	WAGO Class 22G	C34C12.7	1034.54	961.49	1214.37	1190.25	0.27	0.12	2.17	0.0298515	0.24347
WBGene00014209	CSR Class 22G	ZK1067.3	1081.13	1069.62	1337.45	1240.5	0.26	0.12	2.17	0.0298935	0.243496
WBGene00022739	CSR Class 22G	toe-1, ZK430.1	1803.88	1766.03	2175.42	1989.33	0.22	0.1	2.17	0.0299499	0.243574
WBGene00010726	WAGO Class 22G	K09E9.3	3776.2	3490.2	3274.58	3086.96	-0.19	0.09	-2.17	0.0299808	0.243574
WBGene00007075	WAGO Class 22G	AC8.3	8604.86	8320.91	7309.83	7863.71	-0.16	0.07	-2.17	0.0300907	0.244064
WBGene00012222	WAGO Class 22G	W03C9.6	1275.86	1227.73	1051.21	1038.51	-0.26	0.12	-2.17	0.0301432	0.244064
WBGene00048457	piRNA	21ur-1406, C09B9.17	4.78	8.14	0	0	-5.39	2.48	-2.17	0.0301909	NA
WBGene00006529	CSR Class 22G	C47B2.3, tba-2	600.89	561.55	794.31	680.85	0.35	0.16	2.17	0.030263	0.244064
WBGene00006529	ALG Class 26G	C47B2.3, tba-2	8.36	5.81	0.72	1.97	0.35	0.16	2.17	0.030263	0.244064
WBGene00050844	piRNA	21ur-3402, F52B11.42	285.51	226.71	185.34	157.65	-0.58	0.27	-2.17	0.0302813	0.244064
WBGene00009161	WAGO Class 22G	cox-7C, F26E4.6	382.28	439.47	539.56	536.01	0.39	0.18	2.17	0.0303134	0.244064
WBGene00009161	ALG Class 26G	cox-7C, F26E4.6	3.58	0	2.86	0.99	0.39	0.18	2.17	0.0303134	0.244064
TTTTGCTGATCTCTCTTCTCGG	23H-RNA	ChrIII_hairpin1	23.89	5.81	0	2.96	-3.43	1.58	-2.16	0.0303924	NA
WBGene00044789	CSR Class 22G	T07A9.14	2060.72	2084.59	2380.79	2392.32	0.2	0.09	2.16	0.030469	0.245002
MIMAT0000005	miRNA	miR-34-5p	356	494.12	246.17	348.8	-0.52	0.24	-2.16	0.0305315	0.24519
WBGene00011729	CSR Class 22G	set-16, T12D8.1	2016.52	2092.73	2474.54	2283.93	0.21	0.1	2.16	0.0306382	0.245521
WBGene00046426	piRNA	21ur-3120, F55B11.15	97.96	117.43	46.51	68.97	-0.91	0.42	-2.16	0.0306856	0.245521
WBGene00001523	WAGO Class 22G	gbh-2, M05D6.7	1870.78	1791.61	2130.34	2115.45	0.21	0.1	2.16	0.0306902	0.245521
WBGene00007079	WAGO Class 22G	AC8.7	6081.82	5620.13	4994.87	5376.8	-0.17	0.08	-2.16	0.0308583	0.245982
WBGene00043990	WAGO Class 22G	AC8.12	6081.82	5620.13	4994.87	5376.8	-0.17	0.08	-2.16	0.0308583	0.245982
MIMAT0015240	miRNA	miR-788-3p	311.8	261.59	163.16	225.63	-0.57	0.26	-2.16	0.0308824	0.245982
WBGene00049290	piRNA	21ur-3968, F02H6.25	1666.5	1397.48	1154.98	1362.68	-0.28	0.13	-2.16	0.0309046	0.245982
WBGene00009065	CSR Class 22G	F22G12.5	605.67	609.22	736.35	784.3	0.32	0.15	2.16	0.0310366	0.246719
WBGene00005015	CSR Class 22G	K08E4.1, spt-5	625.98	745.24	890.92	827.66	0.33	0.15	2.15	0.0312004	0.247435
WBGene00007485	WAGO Class 22G	C09G1.3	7257.32	7545.44	8334.57	8099.2	0.15	0.07	2.15	0.0312056	0.247435
TGTATTAAACGGTAAGGGCCG	23H-RNA	mir-5592	29.87	13.95	5.01	3.94	-2.28	1.06	-2.15	0.0312241	NA
MIMAT0020776	miRNA	miR-86-3p	137.38	225.55	276.94	274.9	0.6	0.28	2.15	0.0314079	0.248673
WBGene00008383	ALG Class 26G	D1081.5	19.11	6.98	0.72	1.97	-3.33	1.55	-2.15	0.0314395	NA
WBGene00003790	CSR Class 22G	npp-4, Y54E5A.4	543.55	606.89	718.46	732.08	0.33	0.16	2.15	0.0314409	0.248673
WBGene00046068	piRNA	21ur-1845, Y105C5A.88	3.58	9.3	0	0	-5.38	2.5	-2.15	0.0314417	NA
WBGene00173077	piRNA	21ur-7162, Y41E3.426	3.58	9.3	0	0	-5.38	2.5	-2.15	0.0314417	NA
WBGene00022315	WAGO Class 22G	Y81B9A.1	3368.83	3212.33	2742.17	3007.15	-0.2	0.09	-2.15	0.0315089	0.248896
WBGene00009801	WAGO Class 22G	F47A4.5, ipla-2	403.78	391.8	283.38	305.44	-0.44	0.2	-2.15	0.0315514	0.248919
WBGene00046132	piRNA	21ur-4375, H12I19.15	496.96	387.15	332.75	317.27	-0.44	0.21	-2.15	0.0316227	0.249168
WBGene00005061	WAGO Class 22G	B0304.8, sra-35	1590.04	1654.42	1846.96	1941.05	0.22	0.1	2.15	0.0318715	0.250813
WBGene00172855	piRNA	21ur-7436, Y105C5A.1115	80.04	61.62	30.77	35.47	-1.1	0.51	-2.15	0.0319289	NA
WBGene00000549	CSR Class 22G	cls-2, R107.6	13421.6	13500.4	14829.3	14716.5	0.13	0.06	2.15	0.0319408	0.250889
WBGene00013026	CSR Class 22G	Y49A3A.3	91.99	99.99	158.15	154.69	0.7	0.33	2.14	0.0319612	0.250889
WBGene00049837	piRNA	21ur-417, H16O14.20	10.75	2.33	0	0	-5.4	2.52	-2.14	0.0320525	NA
MIMAT0020328	miRNA	miR-231-5p	48.98	82.55	122.37	118.24	0.87	0.41	2.14	0.0321494	0.252051
WBGene00049699	piRNA	21ur-3221, Y57G11B.80	57.34	36.04	22.18	10.84	-1.48	0.69	-2.14	0.0321619	NA
WBGene00013613	WAGO Class 22G	Y102A5C.4	1656.94	1357.95	1167.86	1316.37	-0.28	0.13	-2.14	0.0324061	0.253747
WBGene00018714	CSR Class 22G	F52H2.1	3.58	11.63	27.91	31.53	1.96	0.92	2.14	0.0325651	NA
WBGene00010483	WAGO Class 22G	K01G12.3	468.29	404.59	332.75	318.25	-0.42	0.2	-2.14	0.0327167	0.255859
WBGene00050011	piRNA	21ur-4023, Y105C5B.503	41.81	52.32	23.61	9.85	-1.47	0.69	-2.13	0.0328712	NA
WBGene00020572	WAGO Class 22G	rund-1, T19D7.4	501.74	476.68	342.77	399.05	-0.4	0.19	-2.13	0.0328837	0.256845
WBGene00047676	piRNA	21ur-2539, Y105C5A.234	21.5	13.95	0.72	4.93	-2.71	1.27	-2.13	0.0329189	NA
MIMAT0020327	miRNA	miR-228-3p	181.58	189.51	264.77	269.97	0.53	0.25	2.13	0.032942	0.25698
WBGene00002264	WAGO Class 22G	lec-1, W09H1.6	347.63	308.1	462.28	415.8	0.42	0.2	2.13	0.0330205	0.257168
WBGene00047908	piRNA	21ur-3609, Y105C5B.280	93.18	105.8	42.22	63.06	-0.93	0.43	-2.13	0.033048	0.257168
WBGene00016322	ALG Class 26G	C32E8.4	26.28	11.63	17.89	12.81	-3.34	1.57	-2.13	0.0332674	NA
WBGene00010481	CSR Class 22G	K01G5.10	1.19	2.33	15.74	13.79	3.07	1.44	2.13	0.0333576	NA
WBGene00004377	WAGO Class 22G	F49E7.1, rme-6	1533.89	1266.1	1154.98	1162.66	-0.27	0.13	-2.13	0.0333641	0.259012
WBGene00017944	WAGO Class 22G	F31D5.1	211.45	193	276.22	300.52	0.51	0.24	2.13	0.0333877	0.259012
WBGene00010585	WAGO Class 22G	K05C4.9	6484.4	6301.43	5517.98	5918.72	-0.16	0.08	-2.13	0.0334089	0.259012
WBGene00016931	WAGO Class 22G	C54G6.2	543.55	546.43	652.63	726.17	0.34	0.16	2.13	0.0334696	0.259162
WBGene00171784	piRNA	21ur-7081, Y105C5B.1152	68.09	43.02	17.89	27.59	-1.3	0.61	-2.13	0.0335401	NA
WBGene00013380	CSR Class 22G	memi-2, Y62E10A.14	906.72	985.91	1205.07	1087.78	0.28	0.13	2.13	0.0335439	0.259178
WBGene00000815	CSR Class 22G	csn-3, Y38C1AA.2	321.35	288.33	410.04	409.89	0.43	0.2	2.13	0.0335796	0.259178
WBGene00050354	piRNA	21ur-2904, Y105C5B.542	567.44	573.17	477.3	399.05	-0.38	0.18	-2.12	0.0336275	0.259178
WBGene00048602	piRNA	21ur-1122, Y57G11C.302	118.27	132.54	78	67	-0.79	0.37	-2.12	0.033637	0.259178
WBGene00166811	piRNA	21ur-8662, C17H12.18	114.68	89.52	54.39	56.16	-0.89	0.42	-2.12	0.033779	0.259954
WBGene00050129	piRNA	21ur-3149, Y51H4A.350	234.15	225.55	149.56	161.59	-0.56	0.27	-2.12	0.0340227	0.261508
WBGene00002222	WAGO Class 22G	F20C5.2, klp-11	3746.33	3720.4	4169.07	4220.06	0.17	0.08	2.12	0.0341349	0.262049
WBGene00003911	WAGO Class 22G	C09B8.7, pak-1	316.57	306.93	185.34	251.25	-0.52	0.24	-2.12	0.0342084	0.262293
WBGene00010365	WAGO Class 22G	H04D03.4	205.47	217.41	138.83	142.87	-0.59	0.28	-2.12	0.0343987	0.263429
WBGene00049966	piRNA	21ur-5251, Y73F8A.416	22.7	11.63	3.58	1.97	-2.6	1.23	-2.11	0.0344856	NA
WBGene00194700	ALG Class 26G	B0025.5	59.73	23.25	12.88	14.78	-1.59	0.75	-2.11	0.034504	NA
WBGene00008107	CSR Class 22G	aspm-1, C45G3.1	1818.21	2141.56	2435.9	2216.93	0.23	0.11	2.11	0.0348982	0.266929
WBGene00047361	piRNA	21ur-4145, Y105C5A.203	44.2	59.29	26.48	13.79	-1.35	0.64	-2.11	0.0351554	NA
WBGene00050926	WAGO Class 22G	B0250.11	835.04	1139.37	1237.27	1220.79	0.32	0.15	2.11	0.0351876	0.268682
WBGene00050122	piRNA	21ur-2155, Y73F8A.433	211.45	188.35	157.43	84.74	-0.71	0.34	-2.11	0.0352131	0.268682
WBGene00002005	CSR Class 22G	F26D10.3, hsp-1	530.41	554.57	724.19	645.37	0.34	0.16	2.1	0.0353417	0.268917
WBGene00002005	ALG Class 26G	F26D10.3, hsp-1	1.19	1.16	5.01	0	0.34	0.16	2.1	0.0353417	0.268917
WBGene00045062	WAGO Class 22G	Y38H8A.8	12843.4	11633.2	10380.5	11469.9	-0.16	0.08	-2.1	0.0353921	0.268917
WBGene00044483	CSR Class 22G	H06H21.11	161.27	109.29	212.53	206.91	0.63	0.3	2.1	0.0354154	0.268917
WBGene00011809	WAGO Class 22G	T16G12.8	326.13	315.07	210.39	249.28	-0.48	0.23	-2.1	0.0354723	0.269023
WBGene00001042	WAGO Class 22G	dnj-24, W03A5.7	3521.74	3221.63	3670.3	4027.92	0.19	0.09	2.1	0.0355348	0.269172
WBGene00006566	CSR Class 22G	tgt-1, ZK829.6	375.11	342.97	520.24	432.55	0.41	0.2	2.1	0.0356757	0.269698
WBGene00271791	23H target 22G	W03D2.15	1484.91	1816.02	1880.59	2051.4	0.25	0.12	2.1	0.0356902	0.269698
WBGene00049632	piRNA	21ur-4844, Y57G11C.379	56.15	30.23	17.89	12.81	-1.48	0.71	-2.1	0.0357907	NA
WBGene00049152	piRNA	21ur-3228, R05A10.48	375.11	406.92	264.77	312.34	-0.44	0.21	-2.1	0.0357918	0.27014
WBGene00194699	ERGO target 22G	Y43F8B.22	4.78	0	4.29	4.93	-0.55	0.26	-2.1	0.0359245	0.270541
MIMAT0005523	miRNA	miR-1022-5p	569.83	435.98	321.3	419.74	-0.44	0.21	-2.1	0.0359312	0.270541
WBGene00045570	piRNA	21ur-422, Y40H7A.17	43.01	41.85	10.02	20.69	-1.48	0.71	-2.1	0.0359614	NA
WBGene00010768	WAGO Class 22G	K11D2.1	930.61	880.11	1061.95	1122.26	0.27	0.13	2.1	0.0361372	0.27165
WBGene00020478	WAGO Class 22G	T13C2.2	4893.17	4479.59	4101.09	4215.13	-0.17	0.08	-2.1	0.0361651	0.27165
WBGene00219302	WAGO Class 22G	Y43F8B.28	119.46	115.1	74.42	59.12	-0.81	0.39	-2.09	0.0362095	0.271658
WBGene00011241	ALG Class 26G	mpz-5, R11A8.8	19.11	8.14	1.43	1.97	-3.02	1.44	-2.09	0.0362504	NA
WBGene00169836	piRNA	21ur-11544, K02B2.24	14.34	6.98	0.72	0.99	-3.67	1.75	-2.09	0.0362567	NA
GATTTAGCGCCCCGACATTGA	23H-RNA	F31C3.10, F31C3.9, rrn-3.1, rrn-3.56	8.36	9.3	41.5	20.69	1.82	0.87	2.09	0.0363188	NA
WBGene00019922	WAGO Class 22G	fbxc-28, R07C3.6	495.77	531.32	607.54	701.54	0.35	0.17	2.09	0.0364682	0.273272
WBGene00047222	piRNA	21ur-1975, Y51H4A.147	50.17	39.53	20.04	13.79	-1.4	0.67	-2.09	0.0365378	NA
WBGene00003417	CSR Class 22G	mrt-2, Y41C4A.14	17.92	32.55	59.39	59.12	1.23	0.59	2.09	0.0365529	NA
WBGene00000615	WAGO Class 22G	col-38, F54C9.4	760.97	910.34	1021.16	1027.67	0.29	0.14	2.09	0.0366437	0.274259
WBGene00047373	piRNA	21ur-246, Y105C5A.204	126.63	81.38	55.82	56.16	-0.89	0.43	-2.09	0.0368797	0.27543
WBGene00019139	WAGO Class 22G	bath-1, F59H6.9	2751.21	2804.25	3177.26	3116.52	0.18	0.09	2.09	0.0368879	0.27543
WBGene00016014	CSR Class 22G	C23G10.7	474.26	505.74	614.7	627.64	0.34	0.16	2.09	0.0369482	0.275552
WBGene00008710	CSR Class 22G	F11E6.7	747.83	768.5	940.3	906.48	0.28	0.14	2.08	0.0371407	0.276658
WBGene00048468	piRNA	21ur-5220, Y37A1B.97	382.28	289.49	244.02	234.5	-0.49	0.23	-2.08	0.0371911	0.276706
WBGene00002047	CSR Class 22G	icp-1, Y39G10AR.13	4219.4	4521.45	5150.16	4713.69	0.17	0.08	2.08	0.0374447	0.278111
WBGene00017832	ALG Class 26G	F26F4.13, kbp-2	1.19	6.98	15.74	27.59	2.4	1.15	2.08	0.0374548	NA
WBGene00017832	CSR Class 22G	F26F4.13, kbp-2	0	1.16	0	0.99	2.4	1.15	2.08	0.0374548	NA
WBGene00021658	WAGO Class 22G	Y48G1A.2	1213.73	1155.65	1436.21	1364.65	0.24	0.12	2.08	0.0375496	0.278111
WBGene00016695	WAGO Class 22G	C45H4.14	366.75	352.28	488.04	453.24	0.39	0.19	2.08	0.0375689	0.278111
WBGene00013106	CSR Class 22G	set-26, Y51H4A.12	4054.54	4172.66	4735.83	4491.02	0.17	0.08	2.08	0.0375726	0.278111
WBGene00046860	piRNA	21ur-4388, C35D6.26	1.19	11.63	0	0	-5.38	2.59	-2.08	0.03761	NA
WBGene00018496	WAGO Class 22G	F46F5.5	215.03	111.61	90.17	100.5	-0.78	0.37	-2.08	0.0376532	0.278111
WBGene00020780	WAGO Class 22G	T24H5.1	493.38	424.36	349.21	345.84	-0.4	0.19	-2.08	0.0376896	0.278111
WBGene00050311	piRNA	21ur-4136, H08M01.49	255.65	279.03	166.73	204.94	-0.53	0.25	-2.08	0.0376962	0.278111
WBGene00168390	piRNA	21ur-5557, Y105C5B.873	640.32	524.34	430.79	469	-0.37	0.18	-2.08	0.0377348	0.278111
WBGene00002062	CSR Class 22G	C05D9.5, ife-4	2.39	0	11.45	14.78	3.47	1.67	2.08	0.0378734	NA
WBGene00006727	CSR Class 22G	F25B5.4, ubq-1	249.68	327.86	422.2	370.47	0.46	0.22	2.08	0.0378744	0.278302
WBGene00006727	ALG Class 26G	F25B5.4, ubq-1	0	3.49	0	2.96	0.46	0.22	2.08	0.0378744	0.278302
WBGene00006728	ALG target 22G	ubq-2, ZK1010.1	2.39	0	0	1.97	0.51	0.25	2.08	0.0378938	0.278302
WBGene00018999	ALG target 22G	F57B9.8	10.75	6.98	0.72	0	-4.44	2.14	-2.08	0.0379746	NA
WBGene00004738	CSR Class 22G	F18E2.3, scc-3	824.29	885.92	1110.61	971.51	0.29	0.14	2.07	0.0380775	0.279324
WBGene00166698	piRNA	21ur-6581, Y57G11C.601	9.56	11.63	1.43	0	-3.77	1.82	-2.07	0.0382118	NA
WBGene00018890	CSR Class 22G	F55F8.2	316.57	342.97	487.32	395.11	0.42	0.2	2.07	0.038327	0.280826
WBGene00049484	piRNA	21ur-3042, Y67A10A.110	39.42	16.28	10.73	1.97	-2.09	1.01	-2.07	0.0384538	NA
MIMAT0019990	miRNA	miR-4807	78.84	87.2	37.21	48.28	-0.96	0.47	-2.07	0.0385338	NA
WBGene00044072	CSR Class 22G	ham-3, ZK1128.5	307.02	313.91	450.83	380.33	0.42	0.2	2.07	0.0386555	0.282902
WBGene00000647	WAGO Class 22G	col-71, Y49F6B.10	6961.06	6869.95	7472.99	7842.04	0.15	0.07	2.07	0.0388319	0.283695
WBGene00049114	piRNA	21ur-4864, T27E7.30	442.01	427.85	356.37	294.61	-0.42	0.2	-2.07	0.0388543	0.283695
WBGene00174362	piRNA	21ur-8240, Y51H4A.903	66.9	24.42	21.47	8.87	-1.57	0.76	-2.07	0.0389	NA
WBGene00006985	WAGO Class 22G	Y39E4B.8, zig-8	765.75	791.75	942.44	946.88	0.28	0.13	2.06	0.0389486	0.284045
WBGene00043988	WAGO Class 22G	AC8.10	9346.71	9070.8	8006.83	8616.48	-0.15	0.07	-2.06	0.0390471	0.284045
WBGene00021319	WAGO Class 22G	Y34B4A.2	487.41	456.91	304.13	402.99	-0.42	0.2	-2.06	0.0390748	0.284045
WBGene00016076	WAGO Class 22G	C24H12.7	2319.95	2718.22	2843.07	2982.52	0.21	0.1	2.06	0.0390834	0.284045
WBGene00046160	piRNA	21ur-1718, Y105C5A.95	280.74	269.73	185.34	203.96	-0.5	0.24	-2.06	0.0391494	0.284195
WBGene00049430	piRNA	21ur-3775, R05A10.52	235.34	242.99	147.41	180.31	-0.55	0.27	-2.06	0.0392801	0.284593
WBGene00015111	WAGO Class 22G	B0281.4	3223.09	3200.71	3498.56	3765.83	0.18	0.09	2.06	0.0393142	0.284593
WBGene00017011	CSR Class 22G	D1007.16, eaf-1	139.77	172.07	281.23	192.13	0.61	0.29	2.06	0.0393402	0.284593
WBGene00000520	CSR Class 22G	cku-80, R07E5.8	232.95	227.87	308.42	328.11	0.47	0.23	2.06	0.0394888	0.285338
WBGene00016987	CSR Class 22G	CC8.2	193.53	226.71	308.42	282.78	0.49	0.24	2.06	0.0396276	0.286012
WBGene00009696	WAGO Class 22G	F44F1.4	11477.9	11070.5	9949.68	10507.3	-0.14	0.07	-2.06	0.0396971	0.286184
WBGene00017895	CSR Class 22G	F28B12.3, vrk-1	397.81	348.79	546.72	440.43	0.41	0.2	2.06	0.039748	0.286222
WBGene00047448	piRNA	21ur-4646, C11D2.26	7.17	4.65	0	0	-5.26	2.56	-2.06	0.0397951	NA
WBGene00048572	piRNA	21ur-4677, Y40H7A.93	7.17	4.65	0	0	-5.26	2.56	-2.06	0.0397951	NA
WBGene00050718	piRNA	21ur-3155, C11D2.41	7.17	4.65	0	0	-5.26	2.56	-2.06	0.0397951	NA
WBGene00050760	piRNA	21ur-2989, F38C2.46	7.17	4.65	0	0	-5.26	2.56	-2.06	0.0397951	NA
WBGene00014801	WAGO Class 22G	K08E5.1	5822.58	7244.32	7232.55	7768.14	0.2	0.1	2.05	0.0398981	0.286859
WBGene00008218	CSR Class 22G	C50B6.2, nasp-2	164.86	211.6	307.71	240.41	0.54	0.26	2.05	0.0399279	0.286859
WBGene00165375	piRNA	21ur-5648, Y64G10A.173	118.27	99.99	57.96	66.02	-0.82	0.4	-2.05	0.0400843	0.287653
WBGene00021398	ALG target 22G	Y38C1AA.7	20.31	17.44	2.86	4.93	-2.3	1.12	-2.05	0.0401088	NA
WBGene00010071	WAGO Class 22G	F54F11.3, sre-45	781.28	702.23	915.25	896.63	0.29	0.14	2.05	0.0401797	0.287872
WBGene00047287	piRNA	21ur-5374, Y41E3.82	338.08	380.18	218.26	298.55	-0.48	0.23	-2.05	0.0402067	0.287872
MIMAT0000696	miRNA	miR-354-3p	4.78	6.98	0	0	-5.25	2.56	-2.05	0.0403523	NA
WBGene00049528	piRNA	21ur-1666, Y116A8C.149	4.78	6.98	0	0	-5.25	2.56	-2.05	0.0403523	NA
WBGene00050347	piRNA	21ur-4204, Y57G11C.442	4.78	6.98	0	0	-5.25	2.56	-2.05	0.0403523	NA
WBGene00013617	WAGO Class 22G	fbxa-204, Y102A5C.10	236.53	229.04	173.17	143.85	-0.55	0.27	-2.05	0.0404822	0.289185
WBGene00013618	WAGO Class 22G	fbxa-205, Y102A5C.12	236.53	229.04	173.17	143.85	-0.55	0.27	-2.05	0.0404822	0.289185
WBGene00048804	piRNA	21ur-355, Y57G11C.311	8.36	3.49	0	0	-5.26	2.57	-2.05	0.040561	NA
WBGene00020207	WAGO Class 22G	T04B8.5	1189.84	1052.18	853.71	991.22	-0.28	0.14	-2.05	0.0405865	0.289533
WBGene00174039	piRNA	21ur-6597, Y105C5A.1199	106.32	161.6	68.7	87.69	-0.78	0.38	-2.05	0.0406269	0.289533
WBGene00020933	WAGO Class 22G	W02D3.4	610.45	612.7	444.39	518.27	-0.35	0.17	-2.05	0.0406695	0.289533
WBGene00166465	piRNA	21ur-8675, Y57G11A.106	28.67	20.93	7.87	4.93	-1.94	0.95	-2.05	0.0407522	NA
WBGene00049049	piRNA	21ur-1633, Y57G11C.334	10.75	6.98	0	0.99	-4.35	2.13	-2.05	0.0407687	NA
WBGene00018121	ALG Class 26G	F36H12.5	16.72	13.95	3.58	0.99	-2.7	1.32	-2.05	0.0407952	NA
WBGene00007258	CSR Class 22G	C01H6.9, hasp-1	1069.19	981.26	1219.38	1222.76	0.25	0.12	2.04	0.0409103	0.290918
WBGene00020588	CSR Class 22G	T19H12.2	2177.79	2531.03	2806.58	2637.66	0.21	0.1	2.04	0.0409805	0.291087
WBGene00007733	ALG target 22G	C25G4.6, smz-1	29.87	3.49	0	3.94	-3.16	1.55	-2.04	0.0409893	NA
WBGene00015791	WAGO Class 22G	bubl-1, C15C7.5	304.63	298.79	395.01	406.93	0.41	0.2	2.04	0.041029	0.291102
WBGene00047916	piRNA	21ur-2841, Y37A1B.84	51.37	62.78	28.62	21.68	-1.18	0.58	-2.04	0.041113	NA
WBGene00006840	CSR Class 22G	R05D3.7, unc-116	1038.13	1171.93	1476.28	1203.06	0.28	0.14	2.04	0.041123	0.291439
WBGene00007988	WAGO Class 22G	best-8, C37A5.1	241.31	261.59	202.51	133.02	-0.58	0.28	-2.04	0.0412285	0.291794
WBGene00007679	WAGO Class 22G	C18D11.1	1986.65	2248.52	2360.04	2542.08	0.21	0.1	2.04	0.0413079	0.291794
WBGene00049898	piRNA	21ur-4187, Y40H7A.127	289.1	204.62	166.73	167.5	-0.56	0.28	-2.04	0.0413126	0.291794
WBGene00013657	ALG target 22G	Y105C5B.18	3.58	8.14	0	0	-5.25	2.58	-2.04	0.0416684	NA
WBGene00045695	piRNA	21ur-4519, Y40H7A.22	3.58	8.14	0	0	-5.25	2.58	-2.04	0.0416684	NA
WBGene00009941	ALG target 22G	F52F12.8	1.19	0	1.43	0	-5.25	2.58	-2.04	0.0416684	NA
WBGene00016944	CSR Class 22G	C55B7.5, uri-1	200.7	222.06	304.13	285.74	0.48	0.24	2.04	0.0417456	0.29452
WBGene00013558	CSR Class 22G	Y75B8A.25	648.68	669.67	796.46	820.76	0.29	0.14	2.04	0.0417933	0.294526
WBGene00004276	CSR Class 22G	K09A9.2, rab-14	20.31	27.9	52.95	58.13	1.2	0.59	2.04	0.0418165	NA
WBGene00001979	CSR Class 22G	hmp-2, K05C4.6	664.21	695.25	863.01	803.02	0.29	0.14	2.03	0.0418809	0.294801
WBGene00019094	WAGO Class 22G	F59A7.7	197.11	202.3	294.11	267.02	0.49	0.24	2.03	0.041956	0.294801
WBGene00001031	CSR Class 22G	dnj-13, F54D5.8	556.69	581.31	664.07	761.64	0.32	0.16	2.03	0.0419734	0.294801
WBGene00006039	ALG Class 26G	K07F5.9, ssp-10	32.25	6.98	0.72	5.91	-2.62	1.29	-2.03	0.0419999	NA
WBGene00173031	piRNA	21ur-8160, H16O14.68	28.67	16.28	5.01	5.91	-2.05	1.01	-2.03	0.0422935	NA
WBGene00017160	WAGO Class 22G	F01F1.3	264.01	210.44	163.16	161.59	-0.55	0.27	-2.03	0.0423002	0.296641
WBGene00020022	ALG Class 26G	gldc-1, R12C12.1	20.31	30.23	17.17	13.79	-5.26	2.59	-2.03	0.0423242	NA
WBGene00168070	piRNA	21ur-5638, Y40H7A.205	9.56	2.33	0	0	-5.26	2.59	-2.03	0.0423242	NA
WBGene00011334	CSR Class 22G	mrps-14, T01E8.6	445.59	516.21	390	342.89	-0.39	0.19	-2.03	0.0423301	0.296641
WBGene00166162	piRNA	21ur-5464, Y51H4A.464	145.74	99.99	83.01	55.18	-0.82	0.41	-2.03	0.0424184	0.296929
WBGene00046362	piRNA	21ur-3114, Y57G11A.17	65.7	79.06	36.5	35.47	-1.01	0.5	-2.03	0.0425298	NA
WBGene00022274	WAGO Class 22G	Y73E7A.8	1121.75	1369.57	1421.89	1568.6	0.26	0.13	2.03	0.0425917	0.29771
WBGene00009416	ALG target 22G	F35E2.9	51.37	10.46	11.45	10.84	-0.79	0.39	-2.03	0.042674	0.29771
WBGene00003160	CSR Class 22G	C50F4.11, mdf-1	845.79	970.79	1280.92	973.48	0.31	0.15	2.03	0.0427003	0.29771
WBGene00003599	CSR Class 22G	nhl-3, W04H10.3	28.67	40.69	81.58	62.07	1.05	0.52	2.03	0.0427123	NA
WBGene00022598	CSR Class 22G	ZC395.8, ztf-8	587.75	572.01	752.09	687.74	0.31	0.15	2.03	0.0427199	0.29771
WBGene00047896	piRNA	21ur-2891, Y67A10A.69	124.24	116.26	71.56	70.94	-0.75	0.37	-2.02	0.0428974	0.298168
WBGene00007923	ALG target 22G	C34C12.4	21.5	3.49	2.15	1.97	0.39	0.19	2.02	0.0429351	0.298168
WBGene00170735	piRNA	21ur-10794, Y51H4A.701	9.56	10.46	0.72	0.99	-3.58	1.77	-2.02	0.0429722	NA
WBGene00012000	CSR Class 22G	T24H10.1	412.14	323.21	493.05	474.92	0.4	0.2	2.02	0.0429966	0.298168
WBGene00007617	CSR Class 22G	C15H11.9, rrbs-1	464.71	394.13	578.2	527.14	0.37	0.18	2.02	0.0430166	0.298168
WBGene00002221	CSR Class 22G	C33H5.4, klp-10	3757.08	3701.8	4414.52	3992.45	0.17	0.09	2.02	0.0430233	0.298168
WBGene00003994	CSR Class 22G	C18G1.4, pgl-3	881.63	903.36	1099.16	1038.51	0.26	0.13	2.02	0.0432256	0.298909
WBGene00003994	ALG Class 26G	C18G1.4, pgl-3	8.36	4.65	1.43	5.91	0.26	0.13	2.02	0.0432256	0.298909
WBGene00006944	CSR Class 22G	F18C5.2, wrn-1	292.68	344.14	393.58	457.18	0.42	0.21	2.02	0.0433369	0.299349
WBGene00013265	CSR Class 22G	parn-2, Y57A10A.25	148.13	170.91	226.84	237.46	0.54	0.27	2.02	0.043535	0.300386
WBGene00014090	WAGO Class 22G	ZK822.2	3039.12	3636.69	3786.94	3868.3	0.2	0.1	2.02	0.0435993	0.3005
WBGene00016444	CSR Class 22G	C35D10.7	1002.29	969.63	1235.84	1117.33	0.26	0.13	2.02	0.0436957	0.300833
WBGene00012818	WAGO Class 22G	Y43F8B.7	91.99	96.5	46.51	57.15	-0.87	0.43	-2.02	0.0437486	NA
WBGene00010584	WAGO Class 22G	K05C4.8	1849.27	1688.13	1444.79	1583.38	-0.23	0.11	-2.02	0.0438252	0.301093
WBGene00006489	CSR Class 22G	zhit-3, ZK856.9	353.61	355.76	494.48	431.56	0.39	0.19	2.02	0.0438294	0.301093
WBGene00045655	piRNA	21ur-2179, C46G7.7	15.53	8.14	2.15	0	-3.36	1.67	-2.02	0.0438893	NA
WBGene00010476	CSR Class 22G	K01G5.1, rnf-113	264.01	270.89	364.96	353.72	0.43	0.21	2.01	0.0439504	0.301358
WBGene00044249	WAGO Class 22G	F55B11.6	5547.82	5221.35	4456.03	5083.18	-0.18	0.09	-2.01	0.0439749	0.301358
WBGene00006570	WAGO Class 22G	F39G3.8, tig-2	348.83	389.48	455.84	506.45	0.38	0.19	2.01	0.0440273	0.301358
WBGene00011560	CSR Class 22G	T07C4.3	831.46	1117.28	1220.09	1178.42	0.3	0.15	2.01	0.0440601	0.301358
WBGene00165798	piRNA	21ur-8560, T19E7.8	2.39	9.3	0	0	-5.24	2.6	-2.01	0.0440745	NA
WBGene00018999	ALG Class 26G	F57B9.8	51.37	26.74	15.03	12.81	-1.48	0.74	-2.01	0.0442489	NA
WBGene00049463	piRNA	21ur-4429, M199.51	107.52	113.94	71.56	55.18	-0.8	0.4	-2.01	0.0442893	0.302595
WBGene00014121	ALG target 22G	ZK858.8	54.95	68.59	45.08	58.13	-4.45	2.21	-2.01	0.044359	NA
WBGene00166836	piRNA	21ur-5594, Y67A10A.186	45.4	26.74	16.46	6.9	-1.61	0.8	-2.01	0.0444428	NA
WBGene00009587	CSR Class 22G	F40F11.2, mig-38	874.46	835.93	1019.73	1031.61	0.26	0.13	2.01	0.044473	0.303323
WBGene00017949	WAGO Class 22G	F31D5.6	11537.6	11475.1	10150	10792	-0.14	0.07	-2.01	0.0444925	0.303323
WBGene00002850	CSR Class 22G	C16A3.3, let-716	1044.1	975.44	1214.37	1183.35	0.25	0.12	2.01	0.0445977	0.30371
WBGene00020097	CSR Class 22G	larp-1, R144.7	894.77	938.24	1133.51	1058.22	0.26	0.13	2.01	0.0447385	0.304338
WBGene00047836	piRNA	21ur-122, Y37A1A.26	46.59	29.07	11.45	15.76	-1.48	0.74	-2.01	0.0448187	NA
WBGene00045192	CSR Class 22G	aho-3, K04G2.2	286.71	349.95	236.15	224.65	-0.47	0.23	-2.01	0.0448865	0.305014
WBGene00007354	ALG target 22G	C06A1.3	40.62	36.04	41.5	24.63	-2.72	1.35	-2.01	0.0449387	NA
WBGene00021073	CSR Class 22G	nsun-1, W07E6.1	660.63	662.7	928.85	725.18	0.32	0.16	2.01	0.0449584	0.305172
WBGene00016358	ALG target 22G	C33F10.12	4.78	6.98	0	2.96	-2.29	1.14	-2	0.0450016	NA
WBGene00017279	ALG Class 26G	F09C12.8	23.89	9.3	4.29	0.99	-2.6	1.3	-2	0.0451283	NA
WBGene00169475	piRNA	21ur-6050, F55B11.97	22.7	8.14	3.58	0.99	-2.71	1.35	-2	0.0453492	NA
WBGene00001194	CSR Class 22G	C04A2.3, egl-27	852.96	1011.48	1120.63	1127.19	0.27	0.13	2	0.0454556	0.307778
WBGene00004953	CSR Class 22G	F32H2.3, spd-2	218.62	231.36	305.56	312.34	0.46	0.23	2	0.0455069	0.307778
WBGene00004953	ALG Class 26G	F32H2.3, spd-2	0	1.16	2.86	1.97	0.46	0.23	2	0.0455069	0.307778
WBGene00007076	WAGO Class 22G	AC8.4	2972.22	3046.08	2571.14	2745.06	-0.18	0.09	-2	0.0455876	0.307778
WBGene00043989	WAGO Class 22G	AC8.11	2972.22	3046.08	2571.14	2745.06	-0.18	0.09	-2	0.0455876	0.307778
WBGene00021654	WAGO Class 22G	Y47G7B.2	826.68	775.47	659.07	650.3	-0.29	0.15	-2	0.0456734	0.307824
MIMAT0020335	miRNA	miR-241-3p	204.28	530.16	828.66	972.5	1.29	0.65	2	0.0456926	0.307824
WBGene00050042	piRNA	21ur-929, Y105C5B.510	0	0	4.29	8.87	4.92	2.46	2	0.0457494	NA
MIMAT0000053	miRNA	miR-80-3p	714638	573523	497879	528866	-0.33	0.16	-2	0.0459257	0.309062
WBGene00050571	piRNA	21ur-3588, Y37A1A.69	5.97	6.98	24.33	24.63	1.92	0.96	2	0.0459408	NA
WBGene00050690	piRNA	21ur-16, Y105C5B.587	303.43	229.04	209.67	152.72	-0.55	0.28	-1.99	0.0461364	0.310147
WBGene00010035	ALG Class 26G	F54C8.1	8.36	8.14	0.72	0	-4.34	2.18	-1.99	0.0462348	NA
MIMAT0000282	miRNA	miR-124-3p	66.9	53.48	33.63	20.69	-1.14	0.57	-1.99	0.0462624	NA
WBGene00018163	ALG target 22G	F38A5.6	0	0	0.72	0	-5.27	2.64	-1.99	0.0462645	NA
WBGene00009630	WAGO Class 22G	F42E8.1	1260.33	832.44	836.53	806.96	-0.35	0.17	-1.99	0.0462893	0.310422
WBGene00014956	WAGO Class 22G	Y102A5C.11	522.05	413.89	286.95	403.97	-0.44	0.22	-1.99	0.0462942	0.310422
WBGene00022048	CSR Class 22G	fln-1, Y66H1B.2	775.31	874.29	1083.42	927.17	0.29	0.14	1.99	0.0463257	0.310422
WBGene00010419	ALG target 22G	atp-1, H28O16.1	1.19	0	0	3.94	0.26	0.13	1.99	0.0464033	0.31061
WBGene00017325	ALG Class 26G	F10C1.3	34.64	30.23	6.44	14.78	-1.63	0.82	-1.99	0.0465311	NA
WBGene00010306	CSR Class 22G	F59A2.6, golg-4	559.08	545.27	645.47	733.07	0.32	0.16	1.99	0.0465901	0.310798
WBGene00009659	CSR Class 22G	F43G6.7	207.86	244.15	305.56	317.27	0.46	0.23	1.99	0.0466345	0.310798
WBGene00009659	WAGO Class 22G	F43G6.7	207.86	244.15	305.56	317.27	0.46	0.23	1.99	0.0466345	0.310798
WBGene00050685	piRNA	21ur-1970, Y57G11C.480	457.54	427.85	322.02	356.68	-0.39	0.19	-1.99	0.0466779	0.310798
WBGene00013688	CSR Class 22G	riok-2, Y105E8B.3	370.33	340.65	485.89	438.46	0.38	0.19	1.99	0.0466791	0.310798
WBGene00008725	ALG target 22G	F13A7.7	0	1.16	0	0	-1.73	0.87	-1.99	0.046736	NA
WBGene00019814	WAGO Class 22G	R02C2.1	5237.22	5810.8	6071.13	6265.55	0.16	0.08	1.99	0.046785	0.311172
TCCCTGCCCTTTGTACACACCG	23H-RNA	F31C3.7, F31C3.8, rrn-1.1, rrn-1.2	22.7	40.69	14.31	3.94	-1.77	0.89	-1.98	0.0471468	NA
WBGene00004166	CSR Class 22G	pqn-85, Y43H11AL.3	1690.39	2029.94	2093.84	2257.33	0.23	0.11	1.98	0.0471908	0.313539
WBGene00019585	WAGO Class 22G	K09F6.2	181.58	182.53	126.66	114.3	-0.59	0.3	-1.98	0.0473118	0.313983
WBGene00013461	WAGO Class 22G	Y67H2A.2	657.04	769.66	888.06	858.2	0.29	0.15	1.98	0.0473788	0.313983
WBGene00001007	CSR Class 22G	C39E9.14, dli-1	452.76	440.63	561.74	566.55	0.34	0.17	1.98	0.0474079	0.313983
WBGene00047551	piRNA	21ur-2135, Y73F8A.204	44.2	55.81	17.17	25.62	-1.23	0.62	-1.98	0.0475119	NA
WBGene00003184	CSR Class 22G	F57B10.12, mei-2	301.04	230.2	407.18	324.17	0.46	0.23	1.98	0.0475334	0.314341
WBGene00050429	piRNA	21ur-1793, Y57G11A.80	222.2	232.53	148.84	166.52	-0.53	0.27	-1.98	0.0475678	0.314341
WBGene00019858	WAGO Class 22G	R03H10.6	950.92	882.43	1037.62	1164.63	0.26	0.13	1.98	0.0476123	0.314341
WBGene00009478	ALG target 22G	F36F2.4, syx-7	66.9	63.94	87.3	71.93	-4.34	2.19	-1.98	0.0476482	NA
WBGene00004704	CSR Class 22G	D2089.1, rsp-7	363.16	509.23	550.29	592.17	0.39	0.2	1.98	0.0477241	0.314748
WBGene00016195	CSR Class 22G	C28H8.4, erd-2.2	437.23	512.72	359.95	372.44	-0.38	0.19	-1.98	0.0479868	0.315101
WBGene00016796	CSR Class 22G	C50A2.2, cec-2	255.65	268.57	372.83	332.05	0.43	0.22	1.98	0.048044	0.315101
WBGene00047085	piRNA	21ur-3311, Y57G11C.175	309.41	273.22	210.39	210.86	-0.47	0.24	-1.98	0.0480492	0.315101
WBGene00048676	piRNA	21ur-4385, Y105C5A.317	16.72	10.46	2.15	1.97	-2.72	1.38	-1.98	0.0480685	NA
WBGene00047343	piRNA	21ur-1181, C08F11.32	0	0	12.88	0.99	5.01	2.54	1.98	0.0481146	NA
WBGene00008226	WAGO Class 22G	C50B8.4	573.42	594.1	718.46	719.27	0.3	0.15	1.98	0.0481516	0.315101
WBGene00020696	CSR Class 22G	pygl-1, T22F3.3	841.01	766.17	1003.98	935.05	0.27	0.14	1.98	0.0481988	0.315101
WBGene00007880	CSR Class 22G	C33A12.1	51.37	70.92	113.06	101.49	0.81	0.41	1.98	0.0481992	0.315101
WBGene00046118	piRNA	21ur-3327, Y105C5B.84	191.14	180.21	141.69	98.53	-0.62	0.31	-1.98	0.0482256	0.315101
WBGene00009365	CSR Class 22G	F33H1.4	725.13	720.83	883.76	865.1	0.27	0.14	1.98	0.0482409	0.315101
WBGene00021508	CSR Class 22G	Y41D4A.6	45.4	46.51	100.9	71.93	0.92	0.46	1.98	0.0482571	NA
WBGene00012651	CSR Class 22G	orc-4, Y39A1A.13	463.51	420.87	550.29	570.49	0.34	0.17	1.97	0.0482748	0.315101
WBGene00000923	CSR Class 22G	daf-31, K07H8.3	213.84	240.66	289.82	336.97	0.46	0.23	1.97	0.0483073	0.315101
WBGene00049366	piRNA	21ur-2843, Y105C5A.382	277.15	277.87	225.41	162.58	-0.51	0.26	-1.97	0.0483302	0.315101
WBGene00047699	piRNA	21ur-2569, Y105C5B.255	178	205.78	108.77	144.84	-0.6	0.31	-1.97	0.0484198	0.315357
WBGene00016295	WAGO Class 22G	C32B5.1, fbxc-40	414.53	430.17	526.68	545.86	0.34	0.17	1.97	0.0485945	0.31583
WBGene00020414	ALG Class 26G	T10E9.4	14.34	10.46	1.43	1.97	-2.88	1.46	-1.97	0.0486945	NA
ATGTATGGAGGACGAACACAACC	23H-RNA	C36A4.14	1.19	10.46	0	0	-5.24	2.66	-1.97	0.0487359	NA
WBGene00001603	ALG target 22G	gln-2, K03H1.1	1.19	10.46	0	0	-5.24	2.66	-1.97	0.0487359	NA
WBGene00195071	WAGO Class 22G	C16C8.21	1020.21	1102.17	1248.72	1257.25	0.24	0.12	1.97	0.0487682	0.31583
WBGene00012652	CSR Class 22G	Y39A1A.14	224.59	229.04	367.82	266.03	0.49	0.25	1.97	0.0487792	0.31583
WBGene00046229	piRNA	21ur-4699, Y40H7A.41	10.75	16.28	2.15	1.97	-2.71	1.38	-1.97	0.0488358	NA
WBGene00020391	CSR Class 22G	cct-7, T10B5.5	514.88	513.88	641.18	638.48	0.31	0.16	1.97	0.0488864	0.31583
WBGene00000912	WAGO Class 22G	daf-16, R13H8.1	3975.7	3840.15	3417.7	3566.8	-0.16	0.08	-1.97	0.0489012	0.31583
WBGene00008862	WAGO Class 22G	F15D4.5	59143.3	55434	49752.7	54674.5	-0.13	0.07	-1.97	0.0489299	0.31583
WBGene00019044	WAGO Class 22G	F58E1.13	2023.69	1924.14	1695.97	1741.03	-0.2	0.1	-1.97	0.0489308	0.31583
WBGene00007797	CSR Class 22G	C29A12.1	451.57	499.93	659.07	549.8	0.35	0.18	1.97	0.048937	0.31583
WBGene00004054	WAGO Class 22G	AC8.1	1039.32	951.03	827.23	830.61	-0.26	0.13	-1.97	0.0489456	0.31583
WBGene00010066	WAGO Class 22G	F54F7.6	341.66	311.58	254.75	224.65	-0.44	0.23	-1.97	0.0490202	0.315986
WBGene00003925	ALG target 22G	C36B1.4, pas-4	0	0	0	0.99	0.35	0.18	1.97	0.0492132	0.316896
WBGene00015203	ALG target 22G	B0495.2, cdk-11.1	0	0	0.72	0	0.22	0.11	1.97	0.0492624	0.316896
WBGene00174006	piRNA	21ur-10824, Y54F10BM.18	31.06	26.74	8.59	9.85	-1.65	0.84	-1.97	0.0493333	NA
WBGene00167859	piRNA	21ur-8403, Y41E3.297	78.84	68.59	34.35	41.38	-0.96	0.49	-1.97	0.0493782	NA
WBGene00046111	piRNA	21ur-4116, Y73F8A.88	88.4	43.02	35.06	24.63	-1.13	0.58	-1.96	0.049539	NA
WBGene00048172	piRNA	21ur-930, Y57G11C.265	58.54	52.32	22.18	28.57	-1.13	0.58	-1.96	0.0496519	NA
WBGene00046021	piRNA	21ur-76, Y41E3.36	142.16	198.81	118.07	99.52	-0.65	0.33	-1.96	0.0496975	0.319368
WBGene00013735	CSR Class 22G	Y111B2A.12	311.8	242.99	193.21	201	-0.49	0.25	-1.96	0.0497554	0.319402
WBGene00009733	CSR Class 22G	F45G2.7	13.14	24.42	56.53	37.44	1.33	0.68	1.96	0.0497988	NA
WBGene00049690	piRNA	21ur-5330, Y57G11C.385	160.08	129.05	96.61	83.75	-0.68	0.35	-1.96	0.0498047	0.319402
WBGene00012347	CSR Class 22G	W08G11.3	83.62	89.52	122.37	158.63	0.7	0.35	1.96	0.0499281	0.319866
WBGene00170703	piRNA	21ur-7750, C28D4.14	56.15	20.93	8.59	17.74	-1.57	0.8	-1.96	0.0500465	NA
CATCTCAGAAACATCGGCAAATGG	23H-RNA	F43E2.6	7.17	9.3	0	0.99	-4.24	2.16	-1.96	0.0500933	NA
WBGene00046717	piRNA	21ur-4785, Y105C5A.143	124.24	119.75	88.02	53.21	-0.78	0.4	-1.96	0.0501185	0.320758
WBGene00008743	ALG target 22G	F13D12.9	0	1.16	2.86	8.87	-4.25	2.17	-1.96	0.0501699	NA
WBGene00044461	WAGO Class 22G	Y18H1A.14	534	616.19	714.88	710.4	0.31	0.16	1.96	0.0502761	0.321423
WBGene00049742	piRNA	21ur-2943, C02B10.27	1136.08	851.04	803.62	803.02	-0.31	0.16	-1.96	0.0503249	0.321423
WBGene00045964	piRNA	21ur-2594, Y57G11C.85	295.07	222.06	181.76	180.31	-0.51	0.26	-1.96	0.0505232	0.322362
WBGene00173160	piRNA	21ur-9061, Y105C5A.1135	44.2	11.63	6.44	8.87	-1.87	0.96	-1.96	0.0505556	NA
WBGene00169342	piRNA	21ur-11315, C31H1.61	13.14	0	0	0	-5.41	2.77	-1.95	0.0506367	NA
WBGene00002193	ALG target 22G	kin-5, T13H10.1	1.19	0	1.43	0	-5.41	2.77	-1.95	0.0506367	NA
WBGene00020630	WAGO Class 22G	T20F7.1	2286.5	2121.79	1929.25	1925.28	-0.19	0.1	-1.95	0.0506942	0.323124
WBGene00021351	CSR Class 22G	eif-2alpha, Y37E3.10	192.33	239.5	308.42	289.68	0.47	0.24	1.95	0.050774	0.323304
WBGene00046729	piRNA	21ur-3629, C47A4.25	29.87	10.46	5.01	3.94	-2.16	1.11	-1.95	0.0508152	NA
WBGene00047920	piRNA	21ur-61, Y105C5B.281	44.2	33.72	9.3	19.71	-1.44	0.74	-1.95	0.0508172	NA
WBGene00049958	piRNA	21ur-4655, Y105C5A.437	32.25	52.32	15.74	17.74	-1.34	0.69	-1.95	0.0509011	NA
WBGene00022177	WAGO Class 22G	Y71H2AM.12	727.52	633.63	583.21	500.53	-0.33	0.17	-1.95	0.0509319	0.323944
WBGene00007386	CSR Class 22G	C06H2.2	384.67	359.25	480.88	473.93	0.36	0.18	1.95	0.0509835	0.323944
WBGene00169136	piRNA	21ur-6793, LLC1.66	160.08	158.12	86.59	117.25	-0.65	0.33	-1.95	0.0510295	0.323944
WBGene00172714	piRNA	21ur-13201, Y37A1B.296	5.97	10.46	0	0.99	-4.24	2.17	-1.95	0.0510435	NA
WBGene00016376	CSR Class 22G	C33H5.9, sec-10	424.09	406.92	503.78	553.74	0.35	0.18	1.95	0.0512467	0.324691
WBGene00020184	CSR Class 22G	T03F1.1, uba-5	545.94	523.18	635.45	692.67	0.31	0.16	1.95	0.0512506	0.324691
WBGene00049679	piRNA	21ur-5415, Y105C5A.419	11.95	4.65	0	0.99	-4.25	2.18	-1.95	0.0512542	NA
WBGene00013288	WAGO Class 22G	Y57A10C.10	1030.96	1388.17	1412.59	1521.31	0.28	0.14	1.95	0.0514248	0.325202
WBGene00020549	CSR Class 22G	nmt-1, T17E9.2	489.79	430.17	558.17	604.98	0.34	0.17	1.95	0.051435	0.325202
WBGene00171378	piRNA	21ur-10097, F02H6.64	10.75	11.63	2.15	0	-3.28	1.69	-1.95	0.0514599	NA
WBGene00012554	WAGO Class 22G	Y37D8A.16	1997.41	1963.67	2178.28	2348.96	0.19	0.1	1.95	0.0515115	0.325357
WBGene00000197	CSR Class 22G	aars-2, F28H1.3	2990.14	3491.36	3946.52	3482.06	0.2	0.1	1.94	0.0518341	0.327066
WBGene00167746	piRNA	21ur-7283, Y105C5B.814	23.89	11.63	5.01	1.97	-2.32	1.19	-1.94	0.0518522	NA
TGCCGATGTTTCTGAGATGTCT	23H-RNA	F43E2.6	26.28	32.55	13.6	2.96	-1.8	0.92	-1.94	0.0518705	NA
WBGene00021037	WAGO Class 22G	fbxa-203, W05F2.5	7564.34	9233.57	9237.66	9741.7	0.18	0.09	1.94	0.0520855	0.328322
WBGene00206497	WAGO Class 22G	Y52B11A.18	46976.1	46466.6	41071	44668.8	-0.12	0.06	-1.94	0.0521465	0.328376
WBGene00011001	ALG target 22G	R04B5.1	0	0	0.72	2.96	-2.3	1.18	-1.94	0.0521583	NA
WBGene00171498	piRNA	21ur-6881, C35D6.96	76.46	105.8	55.1	44.34	-0.87	0.45	-1.94	0.0522775	NA
WBGene00046410	piRNA	21ur-645, T23G4.15	26.28	29.07	8.59	8.87	-1.67	0.86	-1.94	0.0523238	NA
WBGene00012967	WAGO Class 22G	kvs-4, Y48A6B.6	1447.88	1675.34	1823.34	1809.02	0.22	0.11	1.94	0.0523437	0.329288
WBGene00047644	piRNA	21ur-581, Y67A10A.68	168.44	220.9	138.83	120.21	-0.59	0.3	-1.94	0.0524201	0.329437
WBGene00012926	ALG target 22G	Y47D3A.13	7.17	6.98	11.45	2.96	-2.91	1.5	-1.94	0.0524261	NA
WBGene00172746	piRNA	21ur-13895, Y73F8A.1001	0	0	8.59	3.94	4.86	2.51	1.94	0.0524439	NA
WBGene00173580	piRNA	21ur-8728, Y57G11B.208	4.78	11.63	0	0.99	-4.23	2.18	-1.94	0.0525878	NA
WBGene00165929	piRNA	21ur-8580, Y67A10A.167	16.72	18.6	5.72	0	-2.56	1.32	-1.94	0.052631	NA
WBGene00000382	CSR Class 22G	C43E11.10, cdc-6	534	542.95	641.18	692.67	0.31	0.16	1.94	0.052676	0.330715
WBGene00009452	CSR Class 22G	F36A2.2	228.17	161.6	327.03	236.47	0.54	0.28	1.94	0.0527373	0.330768
WBGene00006565	CSR Class 22G	tfg-1, Y63D3A.5	1471.77	1350.97	1731.75	1559.74	0.22	0.12	1.94	0.0528042	0.330857
WBGene00050628	piRNA	21ur-3926, Y64G10A.158	296.27	303.45	257.62	156.66	-0.53	0.27	-1.93	0.0530194	0.331874
WBGene00020496	WAGO Class 22G	spat-3, T13H2.5	1143.25	1132.4	996.83	923.23	-0.24	0.13	-1.93	0.0530957	0.33202
WBGene00023405	CSR Class 22G	sor-1, ZK1236.3	54.95	75.57	108.06	115.28	0.77	0.4	1.93	0.0532461	0.332629
WBGene00021756	CSR Class 22G	Y50D7A.8	228.17	230.2	324.17	297.56	0.44	0.23	1.93	0.0533943	0.333223
WBGene00013552	CSR Class 22G	gmn-1, Y75B8A.17	298.66	281.36	390	373.43	0.4	0.21	1.93	0.0535589	0.333501
WBGene00003218	CSR Class 22G	M04B2.1, mep-1	3978.09	3630.88	4497.53	4073.25	0.17	0.09	1.93	0.0535676	0.333501
WBGene00007984	WAGO Class 22G	C36F7.1, irx-1	416.92	312.75	495.91	460.14	0.39	0.2	1.93	0.0536594	0.333501
WBGene00009267	CSR Class 22G	F30A10.10, usp-48	462.32	523.18	602.53	630.59	0.32	0.17	1.93	0.0536774	0.333501
WBGene00000463	WAGO Class 22G	C28A5.4, ceh-43	556.69	569.69	689.84	694.64	0.3	0.15	1.93	0.0537047	0.333501
WBGene00014104	ALG Class 26G	ZK849.6	17.92	30.23	0	9.85	-2.34	1.21	-1.93	0.0537377	NA
WBGene00002214	CSR Class 22G	klc-1, M7.2	940.17	940.56	1115.62	1107.48	0.24	0.13	1.93	0.0538663	0.33396
WBGene00009635	WAGO Class 22G	F42F12.3	399	609.22	632.59	683.8	0.38	0.2	1.93	0.0539333	0.33396
WBGene00077646	WAGO Class 22G	Y51A2A.14	1087.11	999.86	849.41	900.57	-0.25	0.13	-1.93	0.0539384	0.33396
WBGene00173621	piRNA	21ur-7769, Y57G11C.1046	70.48	37.2	13.6	31.53	-1.27	0.66	-1.93	0.0539989	NA
WBGene00173339	piRNA	21ur-9981, Y105C5B.1272	65.7	44.18	29.34	19.71	-1.15	0.6	-1.93	0.0539998	NA
WBGene00045894	piRNA	21ur-3545, Y116A8C.60	5.97	4.65	0	0	-5.1	2.65	-1.93	0.0540616	NA
WBGene00166266	piRNA	21ur-7554, C49A9.18	5.97	4.65	0	0	-5.1	2.65	-1.93	0.0540616	NA
WBGene00171813	piRNA	21ur-10216, Y57G11C.930	5.97	4.65	0	0	-5.1	2.65	-1.93	0.0540616	NA
WBGene00019544	CSR Class 22G	K08F11.5, miro-1	1463.41	1426.54	1646.59	1687.83	0.21	0.11	1.93	0.0542087	0.335302
WBGene00020370	ALG Class 26G	T08H10.3	93.18	83.71	98.04	101.49	-1.51	0.78	-1.92	0.0542574	NA
WBGene00015037	WAGO Class 22G	B0212.3	1889.89	1623.02	1975.77	2096.73	0.21	0.11	1.92	0.0542974	0.335521
WBGene00022102	ALG target 22G	Y69F12A.1	4.78	5.81	0	0	-5.1	2.65	-1.92	0.0544521	NA
WBGene00050601	piRNA	21ur-806, Y51H4A.381	4.78	5.81	0	0	-5.1	2.65	-1.92	0.0544521	NA
WBGene00168810	piRNA	21ur-9259, Y57G11C.740	4.78	5.81	0	0	-5.1	2.65	-1.92	0.0544521	NA
WBGene00173269	piRNA	21ur-6423, Y57G11B.204	11.95	9.3	1.43	0.99	-3.12	1.62	-1.92	0.0545164	NA
WBGene00000546	WAGO Class 22G	clp-6, Y77E11A.10	2104.92	2199.69	1768.96	1980.46	-0.2	0.1	-1.92	0.054526	0.336403
WBGene00173914	piRNA	21ur-9582, Y51H4A.877	7.17	3.49	0	0	-5.11	2.66	-1.92	0.0545999	NA
WBGene00048531	piRNA	21ur-3085, Y57G11C.293	1333.2	1303.3	1223.67	972.5	-0.26	0.14	-1.92	0.0546026	0.336403
WBGene00017225	WAGO Class 22G	F07G6.6, fbxa-52	414.53	315.07	280.51	259.13	-0.43	0.23	-1.92	0.0546547	0.336403
WBGene00017225	ERGO Class 26G	F07G6.6, fbxa-52	4.78	5.81	2.86	0.99	-0.43	0.23	-1.92	0.0546547	0.336403
WBGene00019084	ALG target 22G	F59A6.2	21.5	5.81	2.86	0.99	-2.79	1.45	-1.92	0.0548543	NA
WBGene00049671	piRNA	21ur-3890, Y57G11C.381	187.56	191.83	116.64	139.91	-0.57	0.3	-1.92	0.054874	0.337218
WBGene00021595	CSR Class 22G	Y46E12BL.2	931.8	897.55	1168.57	1015.85	0.26	0.13	1.92	0.0548948	0.337218
WBGene00002220	WAGO Class 22G	C15C7.2, gcc-1	1818.21	1667.2	1495.6	1523.28	-0.21	0.11	-1.92	0.0552646	0.338697
WBGene00169856	piRNA	21ur-6950, Y57G11A.161	8.36	20.93	2.15	2.96	-2.53	1.32	-1.92	0.0552886	NA
WBGene00007622	CSR Class 22G	C16C10.1	253.26	248.8	340.62	330.08	0.42	0.22	1.92	0.0553168	0.338697
WBGene00010453	WAGO Class 22G	fozi-1, K01B6.1	4758.18	4502.85	4056.73	4264.4	-0.15	0.08	-1.92	0.0553415	0.338697
WBGene00000762	WAGO Class 22G	coq-2, F57B9.4	170.83	229.04	278.37	281.8	0.49	0.25	1.92	0.0553515	0.338697
WBGene00019086	ALG Class 26G	F59A6.4	22.7	8.14	4.29	0	-2.77	1.45	-1.91	0.0555424	NA
WBGene00001995	WAGO Class 22G	hpl-1, K08H2.6	713.19	844.07	657.63	606.95	-0.3	0.16	-1.91	0.0555472	0.339564
WBGene00173644	piRNA	21ur-12882, Y105C5A.1171	3.58	6.98	0	0	-5.1	2.66	-1.91	0.0557821	NA
WBGene00021913	WAGO Class 22G	cec-8, Y55B1BR.3	2919.65	2683.34	2453.07	2500.7	-0.18	0.09	-1.91	0.0558485	0.341073
WBGene00004816	WAGO Class 22G	skr-10, Y105C5B.13	303.43	279.03	352.79	419.74	0.41	0.21	1.91	0.055924	0.341202
WBGene00019138	WAGO Class 22G	bath-21, F59H6.8	6078.23	5881.72	5114.38	5646.78	-0.15	0.08	-1.91	0.0560024	0.341348
WBGene00046114	piRNA	21ur-2298, F02H6.12	15.53	38.37	7.16	8.87	-1.76	0.92	-1.91	0.0561916	NA
WBGene00019420	WAGO Class 22G	fbxb-46, K05F6.9	2144.34	2046.22	1808.32	1866.17	-0.19	0.1	-1.91	0.0563289	0.342674
WBGene00010986	WAGO Class 22G	R03A10.6, sprr-1	112.29	75.57	60.83	41.38	-0.87	0.46	-1.91	0.0563808	NA
ATTTGCCGATGTTTCTGAGATGT	23H-RNA	F43E2.6	56.15	55.81	22.18	30.54	-1.09	0.57	-1.91	0.0563851	NA
WBGene00017252	WAGO Class 22G	F08D12.9, sdz-10	721.55	576.66	447.25	569.51	-0.36	0.19	-1.91	0.056444	0.342674
WBGene00050199	piRNA	21ur-4782, Y40H7A.130	71.68	70.92	43.65	28.57	-0.97	0.51	-1.91	0.0564524	NA
WBGene00165231	piRNA	21ur-5488, Y57G11C.511	247.29	304.61	211.1	184.25	-0.48	0.25	-1.91	0.0564567	0.342674
WBGene00022489	CSR Class 22G	Y119D3B.12	178	179.04	252.61	246.33	0.48	0.25	1.91	0.0564839	0.342674
WBGene00018667	WAGO Class 22G	bath-7, F52C6.10	1506.42	1813.7	1777.55	2156.83	0.24	0.13	1.91	0.0564932	0.342674
WBGene00017622	WAGO Class 22G	F20B4.2	1975.9	1713.71	1527.8	1648.41	-0.22	0.11	-1.91	0.0567621	0.343241
WBGene00003086	CSR Class 22G	lst-4, Y37A1B.2	281.93	287.17	364.24	384.27	0.39	0.21	1.91	0.0567765	0.343241
WBGene00008934	CSR Class 22G	F18C12.3	372.72	380.18	475.16	483.78	0.35	0.18	1.9	0.0567842	0.343241
WBGene00017025	CSR Class 22G	D1037.1	134.99	215.09	269.78	240.41	0.54	0.29	1.9	0.0568088	0.343241
WBGene00174340	piRNA	21ur-5847, Y51H4A.900	119.46	125.56	72.28	78.82	-0.7	0.37	-1.9	0.0568602	0.343241
WBGene00022015	WAGO Class 22G	Y61A9LA.3	1596.01	1610.24	1816.19	1857.3	0.2	0.1	1.9	0.057001	0.34376
WBGene00014099	WAGO Class 22G	ZK836.3	373.92	598.75	670.52	609.9	0.4	0.21	1.9	0.0570939	0.34399
WBGene00048159	piRNA	21ur-3427, Y57G11C.264	53.76	41.85	25.05	15.76	-1.22	0.64	-1.9	0.057107	NA
WBGene00021027	WAGO Class 22G	W04C9.5	1425.18	1426.54	1625.12	1660.24	0.2	0.11	1.9	0.0572563	0.344402
WBGene00002072	CSR Class 22G	ima-1, T19B10.7	248.48	245.31	298.4	370.47	0.44	0.23	1.9	0.0572787	0.344402
WBGene00011662	CSR Class 22G	T09F3.2	249.68	287.17	349.93	363.58	0.41	0.22	1.9	0.0574005	0.344402
WBGene00008986	WAGO Class 22G	F20G2.2	904.33	849.88	666.94	779.38	-0.28	0.15	-1.9	0.0574353	0.344402
WBGene00010231	CSR Class 22G	F58B3.4	205.47	193	304.13	248.3	0.47	0.25	1.9	0.0574672	0.344402
WBGene00050576	piRNA	21ur-2103, Y41E3.205	27.48	27.9	4.29	12.81	-1.72	0.91	-1.9	0.0574795	NA
WBGene00045539	piRNA	21ur-2502, Y73F8A.41	69.29	52.32	33.63	24.63	-1.05	0.56	-1.9	0.057487	NA
WBGene00016551	WAGO Class 22G	C40A11.8	524.44	531.32	388.57	446.34	-0.34	0.18	-1.9	0.0574918	0.344402
WBGene00166532	piRNA	21ur-8297, Y105C5B.728	11.95	8.14	0	1.97	-3.46	1.82	-1.9	0.0575158	NA
WBGene00219295	WAGO Class 22G	C34C12.12	1287.8	1298.65	1066.24	1144.92	-0.23	0.12	-1.9	0.0575517	0.344431
WBGene00173960	piRNA	21ur-7036, Y73B6BL.257	53.76	51.16	20.75	27.59	-1.12	0.59	-1.9	0.0576375	NA
WBGene00000040	CSR Class 22G	aco-1, ZK455.1	134.99	130.21	79.43	87.69	-0.67	0.35	-1.9	0.0576976	0.344751
WBGene00009285	CSR Class 22G	F31C3.3	1310.5	1317.25	1494.17	1546.93	0.21	0.11	1.9	0.0577407	0.344751
WBGene00047161	piRNA	21ur-3305, Y57G11C.179	431.26	355.76	301.98	295.59	-0.4	0.21	-1.9	0.0578118	0.344751
WBGene00001671	WAGO Class 22G	F56H9.4, gpa-9	2355.79	2164.81	1899.91	2055.34	-0.19	0.1	-1.9	0.0578533	0.344751
WBGene00003196	CSR Class 22G	C06C3.1, mel-11	399	411.57	518.09	505.46	0.34	0.18	1.9	0.0579037	0.344751
WBGene00020560	WAGO Class 22G	T19C3.2	250.87	431.33	432.94	506.45	0.46	0.24	1.9	0.0579376	0.344751
WBGene00012484	CSR Class 22G	car-1, Y18D10A.17	1371.42	1482.35	1714.57	1590.28	0.21	0.11	1.9	0.0579898	0.344751
WBGene00174552	piRNA	21ur-12265, F44E8.42	8.36	11.63	0	1.97	-3.45	1.82	-1.89	0.058193	NA
WBGene00170225	piRNA	21ur-7592, T07G12.17	22.7	23.25	7.87	4.93	-1.83	0.97	-1.89	0.0582972	NA
WBGene00046845	piRNA	21ur-3897, Y105C5A.155	33.45	19.76	8.59	7.88	-1.69	0.89	-1.89	0.0583089	NA
WBGene00048237	piRNA	21ur-1473, Y57G11B.53	203.09	262.75	171.03	153.71	-0.52	0.27	-1.89	0.0586061	0.348084
WBGene00003562	ALG Class 26G	F09G8.4, ncr-2	32.25	18.6	0	11.82	-1.88	0.99	-1.89	0.058625	NA
WBGene00007332	CSR Class 22G	C05C10.5	82.43	117.43	158.15	153.71	0.64	0.34	1.89	0.0587643	0.348608
WBGene00008133	WAGO Class 22G	C47B2.7, efsc-1	446.79	519.69	542.42	689.71	0.35	0.18	1.89	0.0588054	0.348608
WBGene00048158	piRNA	21ur-2536, Y73F8A.261	31.06	27.9	9.3	10.84	-1.55	0.82	-1.89	0.0588327	NA
WBGene00011771	WAGO Class 22G	T14G8.3	623.59	590.61	494.48	484.77	-0.31	0.16	-1.89	0.058917	0.34894
WBGene00047192	piRNA	21ur-1276, Y51H4A.143	14.34	16.28	2.15	3.94	-2.35	1.25	-1.89	0.0589904	NA
WBGene00004408	CSR Class 22G	F25H2.10, rla-0	154.11	159.28	247.6	201	0.52	0.28	1.89	0.059181	0.350149
WBGene00021001	WAGO Class 22G	W03F9.3	882.82	761.52	629.01	716.32	-0.29	0.15	-1.89	0.059258	0.350149
WBGene00016073	CSR Class 22G	C24H12.4	467.1	484.81	583.93	599.06	0.31	0.17	1.89	0.0593197	0.350149
WBGene00048209	piRNA	21ur-1063, R05A10.35	45.4	19.76	11.45	10.84	-1.55	0.82	-1.89	0.0593512	NA
WBGene00173947	piRNA	21ur-7174, Y105C5A.1195	459.93	482.49	332.75	401.02	-0.36	0.19	-1.89	0.0593781	0.350149
WBGene00008380	CSR Class 22G	D1054.14, prp-38	213.84	230.2	291.25	310.37	0.44	0.23	1.89	0.0594002	0.350149
WBGene00050563	piRNA	21ur-2962, Y57G11B.92	26.28	48.83	12.88	15.76	-1.4	0.74	-1.88	0.0594839	NA
WBGene00046681	piRNA	21ur-4860, Y37A1B.48	11.95	3.49	0.72	0	-4.24	2.25	-1.88	0.059528	NA
MIMAT0000300	miRNA	miR-244-5p	413.34	315.07	262.62	280.81	-0.42	0.22	-1.88	0.0596873	0.351511
WBGene00048285	piRNA	21ur-1017, F52B11.22	129.02	146.49	96.61	76.85	-0.66	0.35	-1.88	0.060019	0.353132
WBGene00012758	WAGO Class 22G	Y41C4A.12	1097.86	1113.79	1279.49	1299.62	0.22	0.12	1.88	0.0601373	0.353497
WBGene00022854	CSR Class 22G	cin-4, ZK1127.7	1112.19	1226.57	1347.47	1384.35	0.22	0.12	1.88	0.0602764	0.353757
WBGene00012595	ALG target 22G	Y38E10A.17	0	2.33	6.44	16.75	3.3	1.76	1.88	0.0603463	NA
WBGene00013917	WAGO Class 22G	cdk-11.2, ZC504.3	1649.77	1559.08	1372.52	1409.97	-0.21	0.11	-1.88	0.0603665	0.353757
WBGene00007372	WAGO Class 22G	C06B8.7	3042.7	3067	2581.88	2842.6	-0.17	0.09	-1.88	0.0603842	0.353757
MIMAT0004225	miRNA	miR-790-5p	1671.27	1539.32	1259.45	1483.87	-0.23	0.12	-1.88	0.0604313	0.353757
WBGene00015809	CSR Class 22G	C16A3.4	498.16	468.54	593.23	605.96	0.31	0.17	1.88	0.0604814	0.353757
WBGene00003592	CSR Class 22G	nfi-1, ZK1290.4	788.45	928.94	1041.2	1014.86	0.26	0.14	1.88	0.0605766	0.353757
WBGene00173763	piRNA	21ur-5608, Y57G11C.1057	89.6	109.29	63.69	51.24	-0.79	0.42	-1.88	0.0606212	0.353757
WBGene00004470	CSR Class 22G	F56F3.5, rps-1	66.9	73.25	108.77	122.18	0.72	0.38	1.88	0.0606327	0.353757
WBGene00009126	ALG target 22G	F25H5.3, pyk-1	2896.96	2812.39	2969.02	2933.25	-5.12	2.73	-1.88	0.0607449	NA
WBGene00049013	piRNA	21ur-933, Y105C5A.350	51.37	41.85	24.33	15.76	-1.21	0.64	-1.88	0.0607695	NA
WBGene00001583	WAGO Class 22G	gfi-3, M163.4	2239.91	2006.69	1815.47	1894.74	-0.2	0.1	-1.87	0.0608236	0.354541
WBGene00048613	piRNA	21ur-2907, Y64G10A.96	11.95	18.6	2.15	3.94	-2.35	1.25	-1.87	0.0608963	NA
WBGene00008682	CSR Class 22G	F11A10.1, lex-1	690.49	741.75	869.45	851.3	0.26	0.14	1.87	0.0609755	0.355096
WBGene00013859	WAGO Class 22G	ZC247.1	10009.7	10169.5	10633.8	11463	0.13	0.07	1.87	0.0610561	0.355235
WBGene00045709	piRNA	21ur-5427, Y37A1B.23	71.68	74.41	39.36	38.43	-0.91	0.49	-1.87	0.0611054	NA
WBGene00047263	piRNA	21ur-1158, Y105C5A.194	7.17	8.14	0	0.99	-4.13	2.21	-1.87	0.0611239	NA
WBGene00173595	piRNA	21ur-6470, Y73F8A.1058	39.42	5.81	3.58	6.9	-2.13	1.14	-1.87	0.061202	NA
WBGene00021823	WAGO Class 22G	Y54C5B.1	4685.3	4244.74	3944.38	4060.44	-0.16	0.08	-1.87	0.0612036	0.355741
WBGene00008929	WAGO Class 22G	F18A11.2	5099.84	5756.16	5866.47	6241.9	0.16	0.08	1.87	0.0612564	0.355741
WBGene00171968	piRNA	21ur-7167, C09B9.65	34.64	10.46	2.15	8.87	-2.07	1.1	-1.87	0.0612803	NA
WBGene00050027	piRNA	21ur-3837, T12E12.20	3.58	11.63	0.72	0	-4.22	2.26	-1.87	0.0613853	NA
WBGene00049485	piRNA	21ur-1490, Y73F8A.382	267.6	238.34	173.17	191.15	-0.48	0.25	-1.87	0.0614633	0.356612
MIMAT0020311	miRNA	miR-52-3p	22.7	60.46	86.59	78.82	0.99	0.53	1.87	0.0615295	NA
WBGene00045790	piRNA	21ur-4773, ZK550.9	76.46	30.23	19.32	26.6	-1.22	0.65	-1.87	0.0615902	NA
WBGene00022139	WAGO Class 22G	tub-2, Y71G12A.3	281.93	306.93	207.52	227.61	-0.44	0.23	-1.87	0.0616709	0.357486
WBGene00045866	piRNA	21ur-3690, F13G11.9	83.62	38.37	30.06	26.6	-1.1	0.59	-1.87	0.0618416	NA
WBGene00018841	ALG target 22G	F54H5.5	8.36	12.79	0.72	1.97	-3.02	1.62	-1.87	0.0620051	NA
WBGene00011592	WAGO Class 22G	T07F10.6	378.69	424.36	490.18	527.14	0.34	0.18	1.87	0.0620091	0.359065
WBGene00013157	WAGO Class 22G	Y53F4B.10	1187.45	1021.95	878.75	973.48	-0.26	0.14	-1.87	0.0620577	0.359065
WBGene00000265	CSR Class 22G	brd-1, K04C2.4	235.34	281.36	334.9	353.72	0.41	0.22	1.86	0.0622696	0.359633
WBGene00001119	WAGO Class 22G	C04C3.5, dyf-3	191.14	205.78	263.34	280.81	0.45	0.24	1.86	0.0623121	0.359633
WBGene00001110	CSR Class 22G	duo-1, F38B7.5	1470.58	1341.67	1732.46	1536.09	0.22	0.12	1.86	0.0623279	0.359633
WBGene00048589	piRNA	21ur-672, Y67A10A.81	109.91	90.68	70.13	43.35	-0.81	0.44	-1.86	0.0625304	0.360188
WBGene00001028	CSR Class 22G	dnj-10, F22B7.5	286.71	365.06	447.25	404.96	0.39	0.21	1.86	0.0625761	0.360188
WBGene00010629	CSR Class 22G	K07C5.6, sluh-7	432.45	503.42	604.68	565.56	0.32	0.17	1.86	0.0625964	0.360188
WBGene00048709	piRNA	21ur-4503, M199.37	84.82	53.48	43.65	23.65	-1.03	0.55	-1.86	0.0626255	NA
WBGene00168641	piRNA	21ur-5820, Y40H7A.215	3.58	37.2	6.44	0	-2.61	1.4	-1.86	0.0628726	NA
WBGene00048749	piRNA	21ur-3863, Y57G11B.65	213.84	175.56	125.95	140.9	-0.55	0.29	-1.86	0.0629423	0.361846
WBGene00047064	piRNA	21ur-5019, Y57G11A.29	132.6	131.38	85.16	82.77	-0.65	0.35	-1.86	0.0630892	0.362358
WBGene00174594	piRNA	21ur-5707, Y37A1B.323	157.69	147.65	103.05	97.55	-0.6	0.33	-1.86	0.0632125	0.362646
WBGene00050044	piRNA	21ur-1073, Y51H4A.342	0	0	11.45	0.99	4.85	2.61	1.86	0.0632251	NA
GCAGCCAAAGACTGATCGATTC	23H-RNA	F31C3.9, rrn-3.1	0	0	1.43	10.84	4.81	2.59	1.86	0.0632407	NA
WBGene00016178	CSR Class 22G	C28C12.2, mesp-1	1038.13	1249.82	1434.06	1277.94	0.25	0.13	1.86	0.0632592	0.362646
WBGene00044077	CSR Class 22G	pacs-1, T18H9.7	953.31	1039.39	1210.79	1134.08	0.24	0.13	1.86	0.0633128	0.362646
WBGene00049928	piRNA	21ur-2835, Y51H4A.332	2.39	1.16	9.3	15.76	2.82	1.52	1.86	0.0633519	NA
WBGene00018199	ERGO target 22G	F39E9.7	2986.55	3406.49	3456.34	3689.96	0.22	0.12	1.86	0.0634141	0.362678
WBGene00000898	WAGO Class 22G	daf-2, Y55D5A.5	1845.69	1964.84	2191.88	2136.14	0.18	0.1	1.86	0.063434	0.362678
WBGene00011502	CSR Class 22G	T05G5.8, vps-53	365.55	370.88	487.32	448.31	0.35	0.19	1.86	0.0635519	0.362874
WBGene00007624	ALG target 22G	C16C10.3, hrde-1	2287.7	2439.19	2830.91	2783.48	-4.12	2.22	-1.86	0.063583	NA
WBGene00022707	ALG target 22G	ZK354.6	1.19	0	3.58	2.96	-4.12	2.22	-1.86	0.063583	NA
WBGene00001638	WAGO Class 22G	B0416.6, gly-13	4569.43	4321.48	3873.53	4125.47	-0.15	0.08	-1.86	0.063584	0.362874
WBGene00019766	CSR Class 22G	M4.1	1136.08	1141.7	1411.87	1251.34	0.23	0.12	1.85	0.0636929	0.363124
WBGene00014029	ALG target 22G	ZK637.12	1.19	9.3	0	0	-5.09	2.74	-1.85	0.0637012	NA
WBGene00019863	WAGO Class 22G	R04A9.3	561.47	647.58	687.69	803.02	0.3	0.16	1.85	0.063867	0.363124
WBGene00171464	piRNA	21ur-6353, Y105C5B.1123	10.75	6.98	0.72	0.99	-3.4	1.83	-1.85	0.0639095	NA
WBGene00044559	WAGO Class 22G	ZK380.5	1508.81	1463.74	1229.4	1338.04	-0.21	0.11	-1.85	0.0639263	0.363124
WBGene00044559	ERGO Class 26G	ZK380.5	185.17	162.77	142.4	175.38	-0.21	0.11	-1.85	0.0639263	0.363124
WBGene00045875	piRNA	21ur-58, Y40H7A.30	63.31	61.62	36.5	25.62	-1	0.54	-1.85	0.0639907	NA
WBGene00000507	CSR Class 22G	cit-1.1, F44B9.4	108.71	134.86	166.73	196.08	0.57	0.31	1.85	0.0640782	0.363124
WBGene00003017	WAGO Class 22G	K10G6.1, lin-31	258.04	208.11	325.6	303.47	0.43	0.23	1.85	0.0640832	0.363124
WBGene00044318	CSR Class 22G	tag-267, W06E11.2	219.81	186.02	304.13	254.21	0.46	0.25	1.85	0.0641431	0.363124
WBGene00009233	WAGO Class 22G	F28H6.4	1806.27	1832.3	1663.05	1502.59	-0.2	0.11	-1.85	0.0641592	0.363124
MIMAT0000293	miRNA	miR-238-3p	20516.4	28064.6	16772.2	18923.8	-0.44	0.24	-1.85	0.064192	0.363124
WBGene00019790	WAGO Class 22G	M116.3	4613.63	4247.07	3911.46	4054.53	-0.15	0.08	-1.85	0.0642066	0.363124
WBGene00050285	piRNA	21ur-1966, B0273.34	11.95	0	0	0	-5.27	2.85	-1.85	0.0643781	NA
WBGene00172271	piRNA	21ur-7600, R11E3.13	11.95	0	0	0	-5.27	2.85	-1.85	0.0643781	NA
WBGene00048843	piRNA	21ur-683, Y41E3.146	26.28	34.88	10.02	11.82	-1.49	0.81	-1.85	0.0643828	NA
WBGene00022213	WAGO Class 22G	Y73B3A.11	1096.66	964.98	899.51	828.64	-0.25	0.14	-1.85	0.0644734	0.364067
WBGene00000081	WAGO Class 22G	ads-1, Y50D7A.7	8152.09	7958.17	8532.08	9122.93	0.13	0.07	1.85	0.0644895	0.364067
WBGene00010209	WAGO Class 22G	F57G4.4, fbxa-191	1174.31	1070.78	916.68	986.29	-0.24	0.13	-1.85	0.0646504	0.364139
WBGene00001601	CSR Class 22G	glh-4, T12F5.3	2014.13	2028.78	2322.12	2246.49	0.18	0.1	1.85	0.0646764	0.364139
WBGene00001601	ALG Class 26G	glh-4, T12F5.3	0	5.81	0	3.94	0.18	0.1	1.85	0.0646764	0.364139
WBGene00016453	CSR Class 22G	C35E7.1, vet-2	7.17	16.28	23.61	44.34	1.53	0.83	1.85	0.0646913	NA
WBGene00001666	WAGO Class 22G	gpa-4, T07A9.7	1689.19	1674.18	1429.76	1503.57	-0.2	0.11	-1.85	0.0647592	0.364278
WBGene00049476	piRNA	21ur-705, Y73F8A.380	26.28	8.14	4.29	2.96	-2.23	1.21	-1.85	0.0648864	NA
WBGene00004488	CSR Class 22G	rps-19, T05F1.3	71.68	80.22	128.81	115.28	0.69	0.37	1.85	0.0650003	0.365306
WBGene00166344	piRNA	21ur-8659, Y105C5B.711	0	0	2.86	8.87	4.75	2.57	1.85	0.0650159	NA
WBGene00050094	piRNA	21ur-1847, Y37A1A.63	76.46	88.36	39.36	52.22	-0.85	0.46	-1.84	0.0651588	NA
WBGene00019947	CSR Class 22G	htz-1, R08C7.3	78.84	84.87	122.37	136.96	0.66	0.36	1.84	0.0652121	0.366169
ATCTCAGAAACATCGGCAAATG	23H-RNA	F43E2.6	19.11	46.51	12.17	10.84	-1.51	0.82	-1.84	0.0652332	NA
WBGene00010280	CSR Class 22G	F58G11.2, rde-12	2041.61	2069.47	2297.79	2343.05	0.17	0.09	1.84	0.0653901	0.366839
WBGene00009644	WAGO Class 22G	F42G4.7	373.92	479	535.27	547.83	0.34	0.19	1.84	0.0657717	0.368651
TTAAACGGTAAGGGCCGGCTGG	23H-RNA	mir-5592	10.75	16.28	2.86	1.97	-2.47	1.34	-1.84	0.0659214	NA
WBGene00045786	piRNA	21ur-1018, Y40H7A.25	915.08	787.1	717.74	691.68	-0.27	0.15	-1.84	0.0659444	0.369284
WBGene00048952	piRNA	21ur-3784, Y51H4A.265	8.36	23.25	29.34	54.19	1.39	0.76	1.84	0.0659487	NA
WBGene00046749	piRNA	21ur-3224, F55B11.18	480.24	437.15	324.17	391.17	-0.36	0.2	-1.84	0.0660024	0.369284
WBGene00048682	piRNA	21ur-331, K08B4.13	0	5.81	16.46	16.75	2.51	1.36	1.84	0.0660618	NA
WBGene00006982	WAGO Class 22G	Y48A6A.1, zig-5	8613.22	9140.56	9559.67	9845.16	0.13	0.07	1.84	0.0661081	0.369326
WBGene00001571	CSR Class 22G	gei-14, K01C8.5	873.27	998.69	1200.06	1032.6	0.26	0.14	1.84	0.0661278	0.369326
WBGene00018362	CSR Class 22G	F42G9.1, ppm-1.G	284.32	344.14	395.73	421.71	0.38	0.21	1.84	0.0663271	0.37011
WBGene00047535	piRNA	21ur-3122, Y51H4A.170	418.12	405.76	332.04	308.4	-0.36	0.2	-1.83	0.0665215	0.370865
WBGene00011133	ALG Class 26G	R08A2.2	16.72	4.65	0.72	1.97	-3.04	1.65	-1.83	0.0666167	NA
WBGene00003415	CSR Class 22G	F58B3.5, mars-1	354.8	375.53	483.74	443.39	0.35	0.19	1.83	0.066721	0.371646
WBGene00023487	CSR Class 22G	F33D4.8, mrps-24	41.81	62.78	20.04	28.57	-1.11	0.61	-1.83	0.066728	NA
WBGene00168017	piRNA	21ur-13099, Y105C5A.725	51.37	49.99	27.19	19.71	-1.1	0.6	-1.83	0.0669706	NA
WBGene00013236	WAGO Class 22G	Y56A3A.18	3200.39	3606.46	3676.74	3980.63	0.17	0.09	1.83	0.0670013	0.372877
WBGene00195183	WAGO Class 22G	R04A9.9	393.03	460.4	487.32	600.05	0.35	0.19	1.83	0.0671052	0.373124
WBGene00048501	piRNA	21ur-290, Y105C5B.355	149.33	66.27	60.11	60.1	-0.84	0.46	-1.83	0.0673109	0.373936
WBGene00018652	ALG Class 26G	F49F1.12	14.34	12.79	2.15	2.96	-2.42	1.32	-1.83	0.0674535	NA
WBGene00001997	CSR Class 22G	hpr-9, Y39A1A.23	199.5	201.13	289.1	256.18	0.45	0.24	1.83	0.0676745	0.375192
WBGene00000564	CSR Class 22G	cnk-1, R01H10.8	240.12	236.01	269.06	383.28	0.45	0.25	1.83	0.0677006	0.375192
WBGene00003479	CSR Class 22G	mtm-9, Y39H10A.3	102.74	129.05	173.17	171.44	0.57	0.31	1.83	0.0677164	0.375192
WBGene00194886	ALG target 22G	C05B5.12	0	11.63	0	0	-5.24	2.87	-1.82	0.0684012	NA
WBGene00000903	WAGO Class 22G	B0412.2, daf-7	479.04	413.89	359.95	337.96	-0.35	0.19	-1.82	0.0684242	0.378779
WBGene00018230	CSR Class 22G	F40E3.2, mage-1	78.84	86.03	104.48	162.58	0.69	0.38	1.82	0.0685017	0.378874
WBGene00012120	ALG target 22G	T28C6.5	1.19	3.49	5.72	2.96	-3.39	1.86	-1.82	0.0685467	NA
WBGene00174799	piRNA	21ur-9180, C49A9.37	26.28	1.16	0.72	2.96	-2.95	1.62	-1.82	0.0685971	NA
WBGene00004043	CSR Class 22G	plk-2, Y71F9B.7	1339.17	1375.39	1615.82	1507.52	0.2	0.11	1.82	0.0687555	0.379662
WBGene00007298	WAGO Class 22G	C04F12.2	1409.65	1749.75	1749.64	1950.9	0.23	0.12	1.82	0.0687653	0.379662
WBGene00016812	CSR Class 22G	C50D2.9	48.98	52.32	111.63	68.97	0.84	0.46	1.82	0.0687829	NA
WBGene00168089	piRNA	21ur-5767, F13G11.82	354.8	275.54	214.68	251.25	-0.44	0.24	-1.82	0.0688388	0.379702
WBGene00173904	piRNA	21ur-7400, C11D2.88	7.17	37.2	4.29	6.9	-2	1.1	-1.82	0.0688917	NA
WBGene00046603	piRNA	21ur-2595, Y57G11C.130	29.87	13.95	7.87	3.94	-1.87	1.03	-1.82	0.0688963	NA
WBGene00012952	WAGO Class 22G	Y47H9C.9	3755.89	3686.68	3359.02	3353.98	-0.15	0.08	-1.82	0.0689153	0.379702
WBGene00018900	CSR Class 22G	F55G1.4, rod-1	1150.42	1099.84	1416.17	1219.81	0.23	0.13	1.82	0.0690048	0.379702
WBGene00046495	piRNA	21ur-765, VY10G11R.9	37.03	25.58	12.88	9.85	-1.45	0.8	-1.82	0.069009	NA
WBGene00013352	WAGO Class 22G	lon-8, Y59A8B.20	3189.64	2922.84	2701.38	2749.98	-0.17	0.09	-1.82	0.0691337	0.379702
WBGene00044268	WAGO Class 22G	T27E7.10	2778.69	2901.91	3235.22	3106.66	0.16	0.09	1.82	0.0691549	0.379702
WBGene00003674	WAGO Class 22G	nhr-84, T06C12.7	954.5	977.77	780.72	850.32	-0.25	0.14	-1.82	0.0692363	0.379702
WBGene00017482	CSR Class 22G	F15E6.1, set-9	5813.03	6097.97	6700.14	6381.81	0.14	0.07	1.82	0.0692567	0.379702
WBGene00011986	CSR Class 22G	T24D1.3	357.19	423.2	490.9	496.59	0.34	0.19	1.82	0.0692877	0.379702
WBGene00167382	piRNA	21ur-7362, Y40H7A.190	2.39	0	6.44	15.76	3.22	1.77	1.82	0.0693504	NA
WBGene00007048	CSR Class 22G	C16A3.7, nfx-1	1241.21	1199.83	1562.15	1298.63	0.23	0.13	1.82	0.0694029	0.379702
WBGene00022378	CSR Class 22G	Y94H6A.5	413.34	420.87	564.61	482.8	0.33	0.18	1.82	0.0694148	0.379702
WBGene00021096	WAGO Class 22G	W08F4.7	499.35	497.6	649.76	578.37	0.3	0.17	1.82	0.0694385	0.379702
WBGene00172641	piRNA	21ur-6546, Y10G11A.71	11.95	15.11	34.35	35.47	1.37	0.75	1.81	0.0695813	NA
WBGene00000772	CSR Class 22G	B0414.5, cpb-3	1218.51	1195.18	1436.21	1353.81	0.21	0.12	1.81	0.0697462	0.381052
WBGene00167665	piRNA	21ur-6004, ZK550.28	56.15	34.88	23.61	15.76	-1.2	0.66	-1.81	0.0698818	NA
WBGene00049911	piRNA	21ur-4837, Y57G11B.86	7.17	8.14	19.32	30.54	1.7	0.94	1.81	0.0699164	NA
WBGene00047989	piRNA	21ur-32, Y57G11C.248	315.38	354.6	266.92	239.43	-0.4	0.22	-1.81	0.0699912	0.381991
WBGene00171970	piRNA	21ur-5897, Y41E3.404	82.43	60.46	28.62	46.31	-0.94	0.52	-1.81	0.0700413	NA
WBGene00004888	ALG target 22G	K12C11.2, smo-1	4.78	2.33	0.72	0	0.54	0.3	1.81	0.070043	0.381991
WBGene00012107	WAGO Class 22G	T27F6.8	8166.43	8459.26	8937.1	9185	0.12	0.07	1.81	0.0701007	0.381991
WBGene00014048	ALG target 22G	ZK666.8	17.92	15.11	1.43	5.91	-2.21	1.22	-1.81	0.0701261	NA
WBGene00012469	CSR Class 22G	Y17G7B.18	221	196.48	279.08	284.75	0.43	0.24	1.81	0.0703025	0.382758
WBGene00170837	piRNA	21ur-6379, C02B10.55	0	0	4.29	6.9	4.69	2.59	1.81	0.0705069	NA
WBGene00165800	piRNA	21ur-5787, Y73F8A.556	219.81	182.53	129.52	150.75	-0.52	0.29	-1.81	0.0705732	0.383596
WBGene00048587	piRNA	21ur-3511, Y73F8A.294	506.52	622	488.75	400.03	-0.34	0.19	-1.81	0.0706127	0.383596
WBGene00171805	piRNA	21ur-7928, Y17G9A.70	186.36	104.64	100.9	78.82	-0.69	0.38	-1.81	0.0706971	0.383596
WBGene00006619	CSR Class 22G	try-1, ZK546.15	82.43	75.57	118.79	131.05	0.66	0.37	1.81	0.0707248	0.383596
WBGene00015916	CSR Class 22G	C17G10.2, ttc-4	240.12	224.39	306.99	310.37	0.41	0.23	1.81	0.0708626	0.383596
WBGene00021449	WAGO Class 22G	mltn-7, Y39D8B.1	144.55	217.41	212.53	313.33	0.53	0.3	1.81	0.0708713	0.383596
WBGene00004439	ALG target 22G	F52B5.6, rpl-25.2	1.19	0	0.72	0	0.48	0.27	1.81	0.0709101	0.383596
WBGene00003413	CSR Class 22G	mrp-7, Y43F8C.12	431.26	381.34	525.96	493.64	0.33	0.18	1.81	0.0709867	0.383596
WBGene00013854	ALG Class 26G	cyc-2.2, ZC116.2	15.53	4.65	1.43	0.99	-3.04	1.69	-1.81	0.0710121	NA
WBGene00050946	WAGO Class 22G	M162.12	845.79	670.83	629.01	606.95	-0.29	0.16	-1.81	0.0710491	0.383596
WBGene00001854	WAGO Class 22G	F22F1.1, hil-3	5724.62	5579.44	5100.07	5202.41	-0.13	0.07	-1.81	0.071068	0.383596
WBGene00014025	CSR Class 22G	asna-1, ZK637.5	118.27	117.43	163.16	183.27	0.55	0.31	1.8	0.0711673	0.383802
WBGene00000878	ALG Class 26G	cyn-2, ZK520.5	13.14	5.81	0	1.97	-3.37	1.87	-1.8	0.0712207	NA
WBGene00001371	ALG target 22G	exl-1, F26H11.5	0	11.63	4.29	0.99	0.45	0.25	1.8	0.0713267	0.384331
MIMAT0000314	miRNA	miR-259-5p	113.49	96.5	57.25	69.96	-0.73	0.4	-1.8	0.071513	0.385004
WBGene00045823	piRNA	21ur-1895, Y105C5B.54	32.25	10.46	7.16	3.94	-1.93	1.07	-1.8	0.0715547	NA
WBGene00011663	WAGO Class 22G	T09F3.4	692.88	620.84	510.94	561.62	-0.29	0.16	-1.8	0.0716916	0.385635
WBGene00019409	ALG Class 26G	K05F1.8	59.73	32.55	12.88	26.6	-1.24	0.69	-1.8	0.0716946	NA
WBGene00046618	piRNA	21ur-3479, F13G11.16	2.39	18.6	1.43	0.99	-3.1	1.72	-1.8	0.0719574	NA
WBGene00047777	piRNA	21ur-1833, Y41E3.103	21.5	23.25	10.02	0.99	-1.98	1.1	-1.8	0.0720664	NA
WBGene00018794	CSR Class 22G	attf-3, F54C4.3	971.23	1142.86	1261.6	1221.78	0.23	0.13	1.8	0.0721611	0.386639
WBGene00013501	WAGO Class 22G	Y71A12B.3	695.27	838.25	629.73	631.58	-0.28	0.16	-1.8	0.0721868	0.386639
WBGene00013501	ERGO Class 26G	Y71A12B.3	4.78	0	2.15	1.97	-0.28	0.16	-1.8	0.0721868	0.386639
WBGene00013410	WAGO Class 22G	fbxb-94, Y63D3A.11	911.5	840.58	737.78	733.07	-0.25	0.14	-1.8	0.0721883	0.386639
WBGene00000622	WAGO Class 22G	col-45, F53G12.7	962.86	716.18	665.51	699.57	-0.3	0.17	-1.8	0.0722367	0.386639
WBGene00001584	CSR Class 22G	F45E4.10, nrde-4	222.2	237.18	290.53	322.19	0.41	0.23	1.8	0.0722483	0.386639
MIMAT0006774	miRNA	miR-1832a-3p	46.59	40.69	13.6	24.63	-1.2	0.67	-1.8	0.0723954	NA
WBGene00000099	CSR Class 22G	air-2, B0207.4	759.78	838.25	938.86	956.73	0.25	0.14	1.8	0.0725199	0.387762
WBGene00012871	ALG Class 26G	Y45F10B.3	25.09	17.44	7.16	21.68	-1.96	1.09	-1.79	0.072863	NA
WBGene00001607	CSR Class 22G	C28D4.3, gln-6	293.88	219.74	349.21	335	0.41	0.23	1.79	0.0728713	0.389298
WBGene00011435	CSR Class 22G	T04D3.8	1.19	0	9.3	7.88	3.86	2.15	1.79	0.0729521	NA
WBGene00021112	CSR Class 22G	W09C3.4	1322.45	1475.37	1668.77	1556.78	0.21	0.11	1.79	0.0729678	0.389298
WBGene00012059	CSR Class 22G	T26G10.1	139.77	162.77	225.41	201.99	0.5	0.28	1.79	0.0730294	0.389298
WBGene00049662	piRNA	21ur-795, Y41E3.166	9.56	10.46	0.72	1.97	-2.94	1.64	-1.79	0.073082	NA
WBGene00019575	WAGO Class 22G	K09E3.4	1375.01	1218.43	1007.56	1193.2	-0.24	0.13	-1.79	0.0730931	0.389298
WBGene00021877	WAGO Class 22G	Y54G2A.12	1238.82	1014.97	936	962.64	-0.25	0.14	-1.79	0.0731174	0.389298
WBGene00019510	CSR Class 22G	K07H8.10, nucl-1	887.6	1035.9	1110.61	1158.72	0.24	0.13	1.79	0.0732608	0.38973
WBGene00045618	piRNA	21ur-3525, Y41E3.26	123.05	106.96	70.84	72.91	-0.68	0.38	-1.79	0.0733449	0.389847
WBGene00046121	piRNA	21ur-3554, Y105C5B.86	43.01	40.69	17.17	19.71	-1.19	0.66	-1.79	0.0733479	NA
WBGene00174104	piRNA	21ur-5894, Y45F10D.134	14.34	4.65	0	1.97	-3.37	1.88	-1.79	0.0733731	NA
GTGGAGTGGATGACGACGACGA	23H-RNA	Y57G11C.1145_hairpin	76.46	65.11	40.07	36.46	-0.89	0.49	-1.79	0.0733882	NA
ATTGTGAAGACATCTCAGAAACA	23H-RNA	F43E2.6	7.17	16.28	0.72	2.96	-2.73	1.52	-1.79	0.0733932	NA
WBGene00004239	CSR Class 22G	puf-3, Y45F10A.2	654.65	662.7	827.23	753.76	0.26	0.15	1.79	0.073554	0.390367
WBGene00008991	CSR Class 22G	F20G4.2	100.35	76.73	112.35	169.47	0.67	0.37	1.79	0.0735673	0.390367
MIMAT0000288	miRNA	miR-233-3p	338.08	315.07	234	262.09	-0.4	0.22	-1.79	0.073694	0.390709
WBGene00171387	piRNA	21ur-5739, C47A4.114	40.62	23.25	10.02	13.79	-1.43	0.8	-1.79	0.073756	NA
WBGene00021608	ALG Class 26G	Y46H3D.1	31.06	22.09	22.9	21.68	-3.41	1.91	-1.79	0.0738159	NA
WBGene00048171	piRNA	21ur-285, T06A10.28	59.73	67.43	26.48	39.41	-0.96	0.54	-1.79	0.073922	NA
WBGene00012486	ALG target 22G	Y18D10A.21	69.29	56.97	55.82	42.37	-2.09	1.17	-1.79	0.0741531	NA
WBGene00046944	piRNA	21ur-1483, Y57G11C.160	13.14	6.98	0.72	1.97	-2.95	1.65	-1.79	0.0741682	NA
WBGene00017175	ALG Class 26G	F02C9.4, irld-3	4.78	4.65	0	0	-4.93	2.76	-1.79	0.074192	NA
WBGene00014032	ALG target 22G	ZK637.15	4.78	4.65	0	0	-4.93	2.76	-1.79	0.074192	NA
WBGene00017175	ALG target 22G	F02C9.4, irld-3	4.78	4.65	0	0	-4.93	2.76	-1.79	0.074192	NA
WBGene00049188	piRNA	21ur-4483, Y10G11A.21	4.78	4.65	0	0	-4.93	2.76	-1.79	0.074192	NA
WBGene00168415	piRNA	21ur-10963, Y64G10A.228	4.78	4.65	0	0	-4.93	2.76	-1.79	0.074192	NA
WBGene00020661	ALG target 22G	smz-2, T21G5.4	0	2.33	10.02	8.87	-4.93	2.76	-1.79	0.074192	NA
WBGene00046108	piRNA	21ur-4846, F52B11.10	5.97	3.49	0	0	-4.94	2.77	-1.78	0.0742856	NA
WBGene00165026	piRNA	21ur-9589, C03C11.3	5.97	3.49	0	0	-4.94	2.77	-1.78	0.0742856	NA
WBGene00171916	piRNA	21ur-7217, C08F11.98	5.97	3.49	0	0	-4.94	2.77	-1.78	0.0742856	NA
WBGene00002957	CSR Class 22G	F33A8.1, let-858	596.12	578.99	719.89	698.58	0.27	0.15	1.78	0.0742946	0.39356
WBGene00023497	WAGO Class 22G	lin-15B, ZK662.4	2477.64	2471.74	2053.77	2322.36	-0.18	0.1	-1.78	0.0744938	0.394108
WBGene00006311	CSR Class 22G	F57B1.2, sun-1	849.38	884.76	973.93	1073	0.24	0.13	1.78	0.0745235	0.394108
ATTGTGAAGACATCTCAGAAAC	23H-RNA	F43E2.6	38.23	26.74	12.17	12.81	-1.38	0.77	-1.78	0.074715	NA
WBGene00013325	ALG Class 26G	Y57G11C.36	250.87	270.89	158.86	218.74	-0.47	0.26	-1.78	0.0747171	0.394798
WBGene00050858	piRNA	21ur-3063, Y105C5B.609	283.13	254.61	196.07	201.99	-0.43	0.24	-1.78	0.0748123	0.394819
MIMAT0020325	miRNA	miR-87-5p	45.4	70.92	110.2	88.68	0.78	0.44	1.78	0.0748468	0.394819
WBGene00004706	CSR Class 22G	F28D9.1, rsr-1	588.95	613.87	724.9	724.2	0.27	0.15	1.78	0.0749451	0.395005
WBGene00019983	CSR Class 22G	R09E12.3, sti-1	236.53	294.14	408.61	302.49	0.43	0.24	1.78	0.0750264	0.395101
WBGene00016414	ALG target 22G	C34F11.2	7.17	4.65	2.15	0.99	-4.02	2.26	-1.78	0.0750568	NA
WBGene00047466	piRNA	21ur-1676, C47A4.34	182.78	156.95	107.34	124.15	-0.56	0.31	-1.78	0.0752234	0.395806
WBGene00014178	WAGO Class 22G	ZK1010.4	2294.87	2143.88	2497.44	2489.86	0.17	0.09	1.78	0.0753002	0.395878
CTAATCGTCCCGATCCTTTCATC	23H-RNA	ChrX_intergenic1	3.58	5.81	0	0	-4.93	2.77	-1.78	0.0753928	NA
WBGene00015089	ALG target 22G	B0252.5	3.58	5.81	0	0	-4.93	2.77	-1.78	0.0753928	NA
WBGene00046532	piRNA	21ur-1585, Y105C5B.129	3.58	5.81	0	0	-4.93	2.77	-1.78	0.0753928	NA
WBGene00015024	ALG target 22G	B0205.10	20.31	10.46	2.86	3.94	-2.19	1.23	-1.78	0.0755565	NA
WBGene00045355	ALG target 22G	D1086.17	31.06	8.14	6.44	2.96	-2.04	1.15	-1.78	0.0756727	NA
WBGene00019994	WAGO Class 22G	cdh-1, R10F2.1	3561.17	3520.43	4013.07	3820.02	0.15	0.08	1.78	0.0756875	0.397247
WBGene00169571	piRNA	21ur-8155, C27H2.85	26.28	17.44	7.87	4.93	-1.76	0.99	-1.78	0.0757594	NA
WBGene00019267	WAGO Class 22G	H39E20.1	8204.66	9114.98	9509.58	9474.68	0.13	0.07	1.78	0.0757914	0.397247
WBGene00017161	CSR Class 22G	F01F1.4, rabn-5	409.76	430.17	472.29	587.24	0.33	0.19	1.78	0.075897	0.397247
WBGene00001689	CSR Class 22G	C38C10.4, gpr-2	1459.83	1409.1	1812.61	1512.44	0.21	0.12	1.77	0.0759228	0.397247
WBGene00021912	CSR Class 22G	affl-2, Y55B1BR.2	72.87	108.12	142.4	138.93	0.64	0.36	1.77	0.0759782	0.397247
WBGene00016605	ALG target 22G	C43E11.5	7.17	2.33	0	0	-4.94	2.78	-1.77	0.0759881	NA
WBGene00047702	piRNA	21ur-1782, Y41E3.101	7.17	2.33	0	0	-4.94	2.78	-1.77	0.0759881	NA
WBGene00174207	piRNA	21ur-6634, Y64G10A.339	7.17	2.33	0	0	-4.94	2.78	-1.77	0.0759881	NA
WBGene00046660	piRNA	21ur-5424, Y105C5A.139	7.17	12.79	2.15	0	-3.13	1.76	-1.77	0.0760446	NA
WBGene00046343	piRNA	21ur-2955, Y41E3.51	13.14	27.9	7.16	3.94	-1.87	1.05	-1.77	0.0760562	NA
WBGene00000817	CSR Class 22G	B0547.1, csn-5	236.53	322.05	375.69	361.61	0.4	0.23	1.77	0.0761317	0.397247
WBGene00018442	WAGO Class 22G	F45C12.11, sdz-18	267.6	287.17	183.91	226.62	-0.44	0.25	-1.77	0.0761545	0.397247
MIMAT0000697	miRNA	miR-355-5p	593.73	470.86	435.8	408.9	-0.33	0.19	-1.77	0.07617	0.397247
WBGene00013805	WAGO Class 22G	bca-2, Y116A8C.28	756.2	749.89	919.54	865.1	0.25	0.14	1.77	0.0761764	0.397247
WBGene00022512	WAGO Class 22G	dot-1.5, ZC53.6	8563.04	9397.5	9732.13	9912.16	0.13	0.07	1.77	0.0761939	0.397247
WBGene00050003	piRNA	21ur-2810, Y41E3.181	37.03	29.07	10.02	15.76	-1.37	0.77	-1.77	0.0761968	NA
WBGene00044063	CSR Class 22G	bpnt-1, ZK430.2	259.23	253.45	336.33	333.03	0.38	0.22	1.77	0.0763641	0.397688
WBGene00013500	WAGO Class 22G	Y71A12B.2	694.07	834.76	629.73	631.58	-0.28	0.16	-1.77	0.0764687	0.397688
WBGene00013500	ERGO Class 26G	Y71A12B.2	4.78	0	2.15	1.97	-0.28	0.16	-1.77	0.0764687	0.397688
WBGene00049384	piRNA	21ur-1507, Y73F8A.372	156.5	201.13	123.08	122.18	-0.54	0.31	-1.77	0.0765543	0.397803
WBGene00000378	CSR Class 22G	cct-2, T21B10.7	639.12	759.19	883.05	802.04	0.27	0.15	1.77	0.0766977	0.398007
WBGene00047857	piRNA	21ur-2816, Y41E3.107	137.38	193	105.91	115.28	-0.58	0.33	-1.77	0.0767204	0.398007
WBGene00013632	WAGO Class 22G	Y105C5A.1	820.7	925.45	947.45	1140.98	0.26	0.14	1.77	0.0769151	0.398659
WBGene00016150	WAGO Class 22G	C26F1.7, hint-3	534	475.51	576.06	670.99	0.3	0.17	1.77	0.0769732	0.398659
WBGene00166586	piRNA	21ur-5682, C52D10.68	0	1.16	3.58	13.79	3.88	2.19	1.77	0.0770641	NA
WBGene00003785	CSR Class 22G	nos-3, Y53C12B.3	967.64	878.94	1128.5	1040.48	0.23	0.13	1.77	0.0770867	0.398917
WBGene00168759	piRNA	21ur-7314, Y73B6BL.148	35.84	26.74	15.03	7.88	-1.43	0.81	-1.77	0.0771245	NA
WBGene00019836	CSR Class 22G	R02F2.7	416.92	522.02	572.48	597.09	0.32	0.18	1.77	0.0773518	0.399959
WBGene00003041	ALG target 22G	lin-61, R06C7.7	204.28	245.31	265.49	227.61	-2.43	1.38	-1.77	0.0775152	NA
WBGene00004778	WAGO Class 22G	K02F2.6, ser-3	1980.68	2004.37	2180.43	2310.54	0.17	0.1	1.76	0.0776198	0.401014
WBGene00023069	23H target 22G	F55A4.9, rncs-1	10.75	3.49	0	0.99	-4.02	2.28	-1.76	0.07772	NA
WBGene00014048	ALG Class 26G	ZK666.8	50.17	23.25	8.59	19.71	-1.39	0.79	-1.76	0.0777259	NA
WBGene00174643	piRNA	21ur-5808, Y73F8A.1132	19.11	16.28	52.24	30.54	1.23	0.7	1.76	0.0777508	NA
WBGene00011795	ALG Class 26G	T16A9.5	29.87	2.33	0	4.93	-2.77	1.57	-1.76	0.0777513	NA
WBGene00049399	piRNA	21ur-1535, Y105C5A.388	70.48	108.12	55.1	47.29	-0.8	0.45	-1.76	0.0777598	NA
WBGene00049774	piRNA	21ur-4747, Y105C5B.487	90.79	101.15	37.21	72.91	-0.81	0.46	-1.76	0.0777617	NA
WBGene00013697	WAGO Class 22G	dsbn-1, Y106G6A.5	295.07	244.15	353.51	350.77	0.39	0.22	1.76	0.0778935	0.401886
WBGene00007924	WAGO Class 22G	C34C12.5, rsu-1	1352.31	1487	1614.39	1638.56	0.2	0.11	1.76	0.0780583	0.401886
WBGene00010362	WAGO Class 22G	enu-3.1, H04D03.1	3776.2	3848.29	4139.02	4267.35	0.14	0.08	1.76	0.0780595	0.401886
WBGene00022051	CSR Class 22G	rep-1, Y67D2.1	170.83	175.56	247.6	227.61	0.46	0.26	1.76	0.0780771	0.401886
WBGene00015283	CSR Class 22G	C01B10.9	332.1	352.28	422.92	443.39	0.34	0.19	1.76	0.0781211	0.401886
WBGene00021945	CSR Class 22G	lem-4, Y55F3BR.8	579.39	634.79	681.96	794.16	0.28	0.16	1.76	0.078173	0.401886
WBGene00047844	piRNA	21ur-4547, Y73F8A.235	2.39	6.98	0	0	-4.92	2.8	-1.76	0.0782338	NA
WBGene00166643	piRNA	21ur-8692, Y73F8A.613	2.39	6.98	0	0	-4.92	2.8	-1.76	0.0782338	NA
WBGene00050562	piRNA	21ur-4920, Y116A8B.31	7.17	9.3	0.72	0.99	-3.29	1.87	-1.76	0.0783736	NA
TGGAGTGGATGACGACGACGAT	23H-RNA	Y57G11C.1145_hairpin	102.74	80.22	57.25	50.25	-0.76	0.43	-1.76	0.0784263	NA
WBGene00006351	WAGO Class 22G	K03A1.5, sur-5	401.39	342.97	309.14	261.11	-0.38	0.22	-1.76	0.0786646	0.404082
WBGene00046679	piRNA	21ur-1316, Y116A8C.82	5.97	12.79	21.47	34.49	1.57	0.89	1.76	0.0787225	NA
WBGene00019762	CSR Class 22G	M03F8.3	536.38	568.52	652.63	686.76	0.28	0.16	1.76	0.0788895	0.404605
WBGene00009660	WAGO Class 22G	F43G6.8	127.82	194.16	224.7	233.52	0.51	0.29	1.76	0.0789575	0.404605
WBGene00006714	WAGO Class 22G	ubc-19, Y69H2.6	8973.99	8390.67	9342.13	9580.11	0.12	0.07	1.76	0.0789599	0.404605
WBGene00006924	CSR Class 22G	F56D12.5, vig-1	290.29	318.56	388.57	391.17	0.36	0.2	1.76	0.0790997	0.40466
WBGene00006924	ALG Class 26G	F56D12.5, vig-1	10.75	8.14	7.87	12.81	0.36	0.2	1.76	0.0790997	0.40466
WBGene00049668	piRNA	21ur-1031, Y67A10A.117	0	0	5.72	4.93	4.62	2.63	1.76	0.0791106	NA
WBGene00049777	piRNA	21ur-2654, Y57G11C.396	0	0	5.72	4.93	4.62	2.63	1.76	0.0791106	NA
WBGene00017920	CSR Class 22G	F29B9.2, jmjd-1.2	1538.67	1597.45	1814.04	1747.93	0.18	0.11	1.75	0.0796208	0.406994
WBGene00003579	ALG target 22G	ndx-2, W02G9.1	1736.98	1664.88	1743.91	1876.02	-2.34	1.33	-1.75	0.0796237	NA
WBGene00014165	CSR Class 22G	puf-12, ZK945.3	793.23	655.72	857.29	880.86	0.26	0.15	1.75	0.079763	0.407323
WBGene00018322	WAGO Class 22G	F41H10.12	267.6	199.97	169.6	165.53	-0.48	0.27	-1.75	0.079815	0.407323
WBGene00023284	WAGO Class 22G	F41B5.1	14327.1	13521.3	12631.7	13051.3	-0.12	0.07	-1.75	0.0799759	0.407492
WBGene00013151	CSR Class 22G	nsun-5, Y53F4B.4	285.51	356.93	416.48	408.9	0.36	0.21	1.75	0.0799781	0.407492
WBGene00000203	CSR Class 22G	arx-5, Y37D8A.1	76.46	68.59	121.65	108.38	0.67	0.38	1.75	0.0801345	0.407866
WBGene00010325	CSR Class 22G	exos-3, F59C6.4	330.91	518.53	554.59	544.87	0.37	0.21	1.75	0.0801816	0.407866
WBGene00009176	CSR Class 22G	F26H9.4, nmat-2	54.95	54.64	97.32	86.71	0.75	0.43	1.75	0.0804792	NA
WBGene00011318	CSR Class 22G	cdt-2, T01C3.1	455.15	525.51	596.09	607.93	0.3	0.17	1.75	0.0804894	0.4091
WBGene00019810	ALG Class 26G	R01H2.2	8.36	1.16	0	0	-4.95	2.83	-1.75	0.080682	NA
WBGene00167758	piRNA	21ur-14686, ZK616.35	8.36	1.16	0	0	-4.95	2.83	-1.75	0.080682	NA
WBGene00172839	piRNA	21ur-7276, Y7A9D.56	8.36	1.16	0	0	-4.95	2.83	-1.75	0.080682	NA
WBGene00017059	ALG target 22G	D2062.7, msrp-5	3.58	2.33	1.43	5.91	-4.95	2.83	-1.75	0.080682	NA
WBGene00008183	CSR Class 22G	C48G7.3, rin-1	678.54	674.32	841.54	771.49	0.25	0.15	1.75	0.0807088	0.409883
WBGene00019821	CSR Class 22G	gtf-2H1, R02D3.3	258.04	310.42	360.66	376.39	0.37	0.21	1.75	0.0809584	0.410518
WBGene00048430	piRNA	21ur-1656, F52B11.24	330.91	418.55	271.21	304.46	-0.38	0.22	-1.75	0.0809647	0.410518
WBGene00013290	ALG Class 26G	Y57G11A.2	20.31	15.11	2.15	6.9	-2	1.15	-1.74	0.0811138	NA
WBGene00019221	CSR Class 22G	H20J04.6	247.29	302.28	400.02	322.19	0.4	0.23	1.74	0.0811238	0.410992
WBGene00001682	CSR Class 22G	F08B6.2, gpc-2	20.31	30.23	62.97	42.37	1.06	0.61	1.74	0.08115	NA
WBGene00044560	WAGO Class 22G	C36C9.6	315.38	311.58	241.16	237.46	-0.39	0.22	-1.74	0.0813101	0.411604
WBGene00014888	WAGO Class 22G	Y43F8B.8	777.7	710.36	572.48	660.15	-0.27	0.16	-1.74	0.0814808	0.411803
WBGene00014888	ERGO Class 26G	Y43F8B.8	1.19	6.98	26.48	8.87	-0.27	0.16	-1.74	0.0814808	0.411803
MIMAT0000298	miRNA	miR-242	370.33	332.51	244.73	294.61	-0.38	0.22	-1.74	0.0815543	0.411843
WBGene00046302	piRNA	21ur-2374, Y40H7A.44	80.04	96.5	47.95	56.16	-0.77	0.44	-1.74	0.0815956	NA
AACCGGACCCTGCCTCTTCATCA	23H-RNA	Y57G11C.1145_hairpin	9.56	6.98	1.43	0	-3.43	1.97	-1.74	0.081756	NA
WBGene00044651	WAGO Class 22G	egrh-3, Y94H6A.11	68.09	47.67	98.04	95.57	0.74	0.43	1.74	0.0822429	0.414986
WBGene00047029	piRNA	21ur-1375, Y105C5A.171	105.13	138.35	70.13	84.74	-0.66	0.38	-1.74	0.0823373	0.415128
WBGene00046206	piRNA	21ur-2890, Y105C5B.91	10.75	0	0	0	-5.12	2.95	-1.74	0.0824571	NA
WBGene00009988	WAGO Class 22G	F53F4.4	2015.33	2226.43	2282.04	2523.36	0.18	0.1	1.74	0.0824738	0.415269
WBGene00011231	WAGO Class 22G	R11A5.3	103.93	74.41	140.97	133.02	0.62	0.36	1.74	0.0824976	0.415269
WBGene00007923	ALG Class 26G	C34C12.4	335.69	394.13	508.79	448.31	-2.6	1.5	-1.74	0.0826684	NA
WBGene00049205	piRNA	21ur-3898, Y105C5A.369	19.11	17.44	7.16	1.97	-1.97	1.13	-1.73	0.0828472	NA
WBGene00046171	piRNA	21ur-51, Y116A8A.22	60.93	52.32	18.61	37.44	-1.03	0.59	-1.73	0.082856	NA
WBGene00044045	WAGO Class 22G	R11G10.3	475.46	459.24	546.72	601.04	0.3	0.17	1.73	0.0829863	0.415321
WBGene00009688	ALG target 22G	F44E5.1	8.36	5.81	3.58	1.97	-0.36	0.21	-1.73	0.0830294	0.415321
WBGene00045410	23H target 22G	E01G4.7	2962.66	2922.84	2604.78	2690.87	-0.15	0.09	-1.73	0.0831377	0.415321
WBGene00045410	WAGO Class 22G	E01G4.7	2962.66	2922.84	2604.78	2690.87	-0.15	0.09	-1.73	0.0831377	0.415321
WBGene00045410	ERGO Class 26G	E01G4.7	499.35	539.46	506.64	590.2	-0.15	0.09	-1.73	0.0831377	0.415321
WBGene00009445	CSR Class 22G	F35G12.12	101.54	101.15	161.01	139.91	0.57	0.33	1.73	0.0831564	0.415321
WBGene00006307	CSR Class 22G	F28C6.6, suf-1	646.29	642.93	827.23	719.27	0.26	0.15	1.73	0.0831591	0.415321
WBGene00044976	WAGO Class 22G	T26H2.10	364.36	292.98	244.73	255.19	-0.4	0.23	-1.73	0.0832468	0.415321
WBGene00015330	CSR Class 22G	C02B10.5	691.69	771.98	855.14	882.83	0.25	0.14	1.73	0.0832672	0.415321
WBGene00009142	WAGO Class 22G	F26A3.4	467.1	468.54	519.52	642.42	0.31	0.18	1.73	0.0834038	0.415321
WBGene00003602	WAGO Class 22G	H01A20.1, nhr-3	1094.27	1446.31	1456.24	1542.99	0.24	0.14	1.73	0.0834329	0.415321
WBGene00048382	piRNA	21ur-694, Y105C5A.285	102.74	118.59	72.99	66.02	-0.67	0.39	-1.73	0.08351	0.415321
WBGene00004093	CSR Class 22G	C18E3.7, ppw-1	655.85	640.61	784.3	760.65	0.25	0.15	1.73	0.0835292	0.415321
WBGene00169694	piRNA	21ur-7361, Y41E3.342	53.76	87.2	27.19	47.29	-0.93	0.54	-1.73	0.0835727	NA
WBGene00020392	CSR Class 22G	knl-3, T10B5.6	1533.89	1404.45	1734.61	1621.81	0.19	0.11	1.73	0.0835916	0.415321
WBGene00048564	piRNA	21ur-2799, Y57G11C.297	1150.42	1374.22	1093.43	1066.1	-0.23	0.13	-1.73	0.083597	0.415321
WBGene00019973	WAGO Class 22G	R09A1.3	259.23	217.41	302.7	326.14	0.4	0.23	1.73	0.0836088	0.415321
WBGene00022416	WAGO Class 22G	Y102A11A.6	901.94	1034.74	1127.07	1138.03	0.23	0.13	1.73	0.0836748	0.415321
WBGene00015185	CSR Class 22G	B0432.3, mrpl-41	59.73	82.55	125.95	102.47	0.68	0.4	1.73	0.0837451	0.415321
WBGene00008641	CSR Class 22G	F10B5.5, pch-2	59.73	84.87	138.83	95.57	0.7	0.41	1.73	0.083766	0.415321
WBGene00004375	CSR Class 22G	F46F6.1, rme-4	304.63	230.2	198.22	195.09	-0.44	0.26	-1.73	0.0839892	0.415928
WBGene00022286	CSR Class 22G	rga-4, Y75B7AL.4	1162.37	1312.6	1486.3	1373.51	0.21	0.12	1.73	0.0840211	0.415928
WBGene00169207	piRNA	21ur-7881, Y9C9A.72	1.19	8.14	0	0	-4.92	2.85	-1.73	0.0841115	NA
WBGene00013279	ALG target 22G	Y57A10B.7	8.36	11.63	6.44	5.91	-1.2	0.69	-1.73	0.0841451	NA
WBGene00007623	CSR Class 22G	C16C10.2	65.7	91.85	125.95	121.19	0.65	0.38	1.73	0.0842385	0.416519
WBGene00017507	WAGO Class 22G	F16B4.5	3936.28	3648.32	3368.32	3481.08	-0.15	0.09	-1.73	0.084293	0.416519
WBGene00017084	CSR Class 22G	E01A2.1	113.49	140.68	191.78	173.41	0.52	0.3	1.73	0.0843398	0.416519
WBGene00001058	CSR Class 22G	dpf-5, R11E3.8	216.23	313.91	396.44	314.31	0.42	0.25	1.73	0.0844807	0.416886
WBGene00019531	ALG target 22G	K08D10.8, scrm-5	0	0	0	0.99	4.59	2.66	1.72	0.084768	NA
WBGene00004985	CSR Class 22G	spo-11, T05E11.4	41.81	61.62	65.84	118.24	0.83	0.48	1.72	0.0848043	NA
WBGene00004437	CSR Class 22G	C03D6.8, rpl-24.2	195.92	231.36	323.45	252.24	0.43	0.25	1.72	0.0848273	0.418083
WBGene00008110	WAGO Class 22G	C46C2.2	955.7	912.66	739.93	841.45	-0.24	0.14	-1.72	0.084905	0.418083
WBGene00005147	WAGO Class 22G	F48F5.4, srd-70	1355.89	1440.49	1556.43	1636.59	0.19	0.11	1.72	0.084923	0.418083
WBGene00003654	WAGO Class 22G	C45E1.1, nhr-64	173.22	165.09	229.71	232.53	0.45	0.26	1.72	0.0852541	0.419383
WBGene00045557	piRNA	21ur-4509, Y105C5A.39	60.93	49.99	32.92	22.66	-0.99	0.57	-1.72	0.0853763	NA
WBGene00194725	WAGO Class 22G	T16H12.13	329.72	347.62	405.03	451.27	0.34	0.2	1.72	0.0854696	0.419728
WBGene00007213	ERGO target 22G	C01A2.1	1624.68	1967.16	1775.4	1932.18	0.57	0.33	1.72	0.085479	0.419728
WBGene00022850	CSR Class 22G	ZK1127.3	112.29	89.52	149.56	150.75	0.57	0.33	1.72	0.0855249	0.419728
WBGene00003421	CSR Class 22G	F09E8.3, msh-5	1054.85	1173.09	1262.31	1316.37	0.21	0.12	1.72	0.0857483	0.420495
WBGene00009274	ALG target 22G	F30F8.5	0	0	0	0	-1.87	1.09	-1.72	0.0858378	NA
WBGene00009994	CSR Class 22G	F53F4.12	330.91	265.08	442.24	336.97	0.39	0.23	1.72	0.0859307	0.420694
WBGene00016307	WAGO Class 22G	C32B5.14, fbxc-18	1606.77	1511.41	1320.28	1408.98	-0.19	0.11	-1.72	0.0860648	0.420694
WBGene00002189	WAGO Class 22G	kin-1, ZK909.2	538.77	480.16	362.81	450.28	-0.33	0.19	-1.72	0.0860748	0.420694
WBGene00046771	piRNA	21ur-2361, Y105C5A.149	46.59	32.55	22.9	9.85	-1.26	0.73	-1.72	0.0860819	NA
WBGene00166526	piRNA	21ur-7301, Y37A1B.178	189.94	179.04	140.26	118.24	-0.51	0.3	-1.72	0.0860993	0.420694
WBGene00047947	piRNA	21ur-5195, M199.31	187.56	195.32	132.39	139.91	-0.49	0.29	-1.72	0.0861243	0.420694
WBGene00021927	WAGO Class 22G	abhd-14, Y55F3AM.10	5670.87	5065.56	5794.91	6041.88	0.14	0.08	1.72	0.0862132	0.420801
WBGene00011350	CSR Class 22G	perm-1, T01H3.4	361.97	395.29	513.08	436.49	0.33	0.19	1.71	0.0864077	0.421176
WBGene00008546	CSR Class 22G	F07A11.2, gfat-1	266.4	326.7	420.77	347.81	0.38	0.22	1.71	0.0864244	0.421176
WBGene00169174	piRNA	21ur-7878, Y105C5A.823	1.19	0	7.16	8.87	3.76	2.19	1.71	0.0865294	NA
WBGene00021012	CSR Class 22G	pig-1, W03G1.6	861.32	797.56	942.44	1006.98	0.23	0.14	1.71	0.0865632	0.421525
WBGene00045877	piRNA	21ur-2707, C11D2.11	5.97	6.98	0.72	0	-3.99	2.33	-1.71	0.0867201	NA
WBGene00168841	piRNA	21ur-8392, H06H21.23	5.97	6.98	0.72	0	-3.99	2.33	-1.71	0.0867201	NA
WBGene00049736	piRNA	21ur-2535, Y105C5A.424	183.97	123.24	110.92	91.63	-0.6	0.35	-1.71	0.0867391	0.422054
WBGene00019888	CSR Class 22G	btbd-10, R05F9.1	518.47	469.7	601.1	602.02	0.28	0.17	1.71	0.0870987	0.423475
WBGene00047280	piRNA	21ur-5216, Y57G11C.191	0	10.46	0	0	-5.08	2.97	-1.71	0.0872429	NA
WBGene00048333	piRNA	21ur-2302, Y57G11C.273	0	10.46	0	0	-5.08	2.97	-1.71	0.0872429	NA
WBGene00167313	piRNA	21ur-10546, T28H11.13	0	10.46	0	0	-5.08	2.97	-1.71	0.0872429	NA
WBGene00171032	piRNA	21ur-12886, F55B11.108	0	10.46	0	0	-5.08	2.97	-1.71	0.0872429	NA
WBGene00174518	piRNA	21ur-9558, Y73F8A.1126	0	10.46	0	0	-5.08	2.97	-1.71	0.0872429	NA
WBGene00019940	CSR Class 22G	npp-21, R07G3.3	690.49	876.62	1076.98	832.58	0.29	0.17	1.71	0.0874454	0.424644
WBGene00017751	WAGO Class 22G	F23F12.3	673.77	559.22	439.38	553.74	-0.31	0.18	-1.71	0.0875334	0.424644
WBGene00022046	CSR Class 22G	Y66H1A.4	333.3	360.41	427.93	443.39	0.33	0.19	1.71	0.0875423	0.424644
WBGene00048518	piRNA	21ur-1221, K02B2.11	26.28	5.81	0.72	5.91	-2.32	1.36	-1.71	0.0875526	NA
WBGene00004319	CSR Class 22G	rbr-2, ZK593.4	628.37	570.85	689.12	753.76	0.27	0.16	1.71	0.0877101	0.42513
WBGene00004322	CSR Class 22G	E03A3.2, rcq-5	299.85	319.72	452.97	345.84	0.37	0.22	1.71	0.0878055	0.425264
MIMAT0000295	miRNA	miR-239b-5p	35.84	12.79	8.59	6.9	-1.64	0.96	-1.71	0.0879396	NA
WBGene00020686	ALG Class 26G	T22D1.8	4.78	10.46	5.72	0	-3.99	2.34	-1.71	0.0879981	NA
WBGene00046820	piRNA	21ur-5207, Y105C5B.159	37.03	45.34	17.89	19.71	-1.13	0.67	-1.71	0.0881441	NA
WBGene00049175	piRNA	21ur-4881, Y73F8A.353	127.82	159.28	93.74	98.53	-0.58	0.34	-1.71	0.0881918	0.426805
WBGene00022876	ALG target 22G	ZK1248.5	4.78	5.81	4.29	2.96	-4	2.35	-1.7	0.0883191	NA
WBGene00009492	ALG target 22G	F36H1.3	2.39	4.65	0	1.97	-4	2.35	-1.7	0.0883191	NA
WBGene00169658	piRNA	21ur-6141, K08B4.24	25.09	17.44	4.29	8.87	-1.71	1	-1.7	0.0883515	NA
WBGene00050342	piRNA	21ur-1511, Y73F8A.450	100.35	102.31	65.84	60.1	-0.68	0.4	-1.7	0.0884293	0.426953
WBGene00050091	piRNA	21ur-2952, Y105C5B.513	111.1	89.52	64.4	59.12	-0.7	0.41	-1.7	0.0884455	0.426953
WBGene00001764	WAGO Class 22G	F37B1.5, gst-16	500.55	403.43	327.74	384.27	-0.35	0.2	-1.7	0.0884725	0.426953
WBGene00166739	piRNA	21ur-7457, Y73F8A.622	62.12	106.96	49.38	47.29	-0.81	0.47	-1.7	0.0884987	NA
WBGene00007547	CSR Class 22G	C13C4.2, nhr-154	62.12	48.83	29.34	27.59	-0.96	0.56	-1.7	0.0885212	NA
WBGene00014958	WAGO Class 22G	Y105C5A.2	692.88	672	534.55	599.06	-0.27	0.16	-1.7	0.0885362	0.426953
WBGene00010465	CSR Class 22G	K01D12.6, miga-1	312.99	333.67	394.29	423.68	0.34	0.2	1.7	0.088669	0.426953
WBGene00018199	23H target 22G	F39E9.7	2986.55	3406.49	3456.34	3689.96	0.16	0.09	1.7	0.088767	0.426953
WBGene00018199	ERGO Class 26G	F39E9.7	2986.55	3406.49	3456.34	3689.96	0.16	0.09	1.7	0.088767	0.426953
WBGene00018199	WAGO Class 22G	F39E9.7	1103.83	1199.83	1309.54	1378.44	0.16	0.09	1.7	0.088767	0.426953
WBGene00046750	piRNA	21ur-3604, Y57G11C.137	163.66	168.58	116.64	114.3	-0.52	0.31	-1.7	0.0889374	0.427206
WBGene00014922	WAGO Class 22G	Y57G11B.4	436.04	449.94	341.34	367.52	-0.32	0.19	-1.7	0.0889559	0.427206
WBGene00015022	WAGO Class 22G	B0205.8	342.86	359.25	450.11	428.61	0.32	0.19	1.7	0.0890336	0.427252
WBGene00014179	ALG Class 26G	ZK1010.5	33.45	23.25	12.17	8.87	-1.42	0.84	-1.7	0.089065	NA
WBGene00170197	piRNA	21ur-5860, Y37A1A.109	64.51	44.18	32.2	21.68	-1	0.59	-1.7	0.0891524	NA
WBGene00013877	CSR Class 22G	ints-2, ZC376.6	471.88	555.73	590.37	669.02	0.29	0.17	1.7	0.0891815	0.427502
WBGene00003821	CSR Class 22G	K01C8.9, nst-1	401.39	512.72	624.72	518.27	0.32	0.19	1.7	0.0892219	0.427502
WBGene00050241	piRNA	21ur-2287, H32C10.23	4.78	12.79	0	1.97	-3.26	1.92	-1.7	0.0897657	NA
WBGene00022296	CSR Class 22G	xpc-1, Y76B12C.2	317.77	346.46	390	452.25	0.34	0.2	1.7	0.0898038	0.429902
WBGene00010679	ALG Class 26G	K08F4.5	32.25	11.63	6.44	6.9	-1.72	1.01	-1.7	0.0898333	NA
WBGene00009966	CSR Class 22G	F53B7.3, isy-1	163.66	202.3	242.59	254.21	0.44	0.26	1.7	0.0899045	0.429902
WBGene00013672	WAGO Class 22G	catp-1, Y105E8A.12	2237.53	2445	2525.35	2730.28	0.17	0.1	1.7	0.0899285	0.429902
WBGene00048701	piRNA	21ur-112, Y105C5A.323	45.4	26.74	19.32	9.85	-1.29	0.76	-1.7	0.0899848	NA
WBGene00007230	ALG target 22G	C01G10.1	1.19	2.33	1.43	0.99	-1.11	0.65	-1.7	0.0899961	NA
WBGene00017082	WAGO Class 22G	DC2.5	703.63	745.24	889.49	822.73	0.24	0.14	1.7	0.0899988	0.42991
WBGene00018841	ALG Class 26G	F54H5.5	8.36	15.11	1.43	2.96	-2.45	1.44	-1.7	0.0900052	NA
WBGene00045890	piRNA	21ur-5113, Y57G11B.15	13.14	11.63	3.58	0.99	-2.4	1.41	-1.7	0.0900415	NA
WBGene00011635	WAGO Class 22G	mdmh-35, T09A5.7	2173.02	2221.78	2461.66	2439.61	0.16	0.09	1.69	0.0902277	0.430134
WBGene00008681	WAGO Class 22G	F11A6.2, scrm-4	1391.73	1345.16	1100.59	1270.06	-0.21	0.12	-1.69	0.0902293	0.430134
WBGene00045277	WAGO Class 22G	ZK742.6	585.36	561.55	719.18	658.18	0.27	0.16	1.69	0.0902513	0.430134
MIMAT0006771	miRNA	miR-1829c-5p	125.44	99.99	90.17	43.35	-0.74	0.44	-1.69	0.0905596	0.431276
WBGene00013531	WAGO Class 22G	Y73F8A.26	2347.43	2408.96	2571.14	2734.22	0.16	0.09	1.69	0.0906706	0.431477
WBGene00046335	piRNA	21ur-2814, Y105C5B.107	93.18	96.5	59.39	57.15	-0.7	0.42	-1.69	0.0909556	0.432505
WBGene00044243	ALG Class 26G	F16C3.4	16.72	4.65	0	2.96	-2.94	1.74	-1.69	0.0911372	NA
WBGene00002117	WAGO Class 22G	F52B11.6, ins-34	255.65	294.14	354.22	352.74	0.36	0.21	1.69	0.0912743	0.433691
WBGene00004476	CSR Class 22G	rps-7, ZC434.2	114.68	115.1	181.05	150.75	0.53	0.32	1.69	0.0913691	0.433813
WBGene00173122	piRNA	21ur-7724, K08B4.32	10.75	2.33	0.72	0	-4	2.37	-1.69	0.0914647	NA
WBGene00003905	CSR Class 22G	pad-1, Y18D10A.13	813.54	785.93	991.82	887.76	0.23	0.14	1.69	0.0914872	0.434045
WBGene00046713	piRNA	21ur-5197, Y57G11C.135	120.66	77.9	71.56	45.32	-0.76	0.45	-1.69	0.0915667	0.434094
WBGene00048490	piRNA	21ur-4595, Y57G11C.289	0	0	7.16	2.96	4.55	2.7	1.69	0.0916631	NA
WBGene00047142	piRNA	21ur-2005, Y57G11B.38	114.68	73.25	52.24	60.1	-0.74	0.44	-1.69	0.0918865	NA
WBGene00014888	ERGO target 22G	Y43F8B.8	777.7	710.36	572.48	660.15	2.12	1.26	1.69	0.0919674	NA
WBGene00048232	piRNA	21ur-637, Y37A1B.92	74.07	55.81	37.21	33.5	-0.87	0.52	-1.68	0.092431	NA
WBGene00023245	WAGO Class 22G	C33E10.3	599.7	749.89	795.75	826.67	0.26	0.16	1.68	0.0926046	0.437763
WBGene00019365	WAGO Class 22G	K03E6.7, rei-2	1244.8	1445.14	1482.72	1616.88	0.2	0.12	1.68	0.092611	0.437763
WBGene00019909	WAGO Class 22G	R06A10.1	409.76	409.24	488.75	520.24	0.3	0.18	1.68	0.0926198	0.437763
WBGene00019909	ALG Class 26G	R06A10.1	0	0	0	0	0.3	0.18	1.68	0.0926198	0.437763
WBGene00007610	ALG Class 26G	C15H7.3	17.92	15.11	2.86	5.91	-1.93	1.15	-1.68	0.0933414	NA
WBGene00022751	ALG target 22G	msrp-2, ZK484.5	22.7	15.11	0.72	8.87	-2.03	1.21	-1.68	0.0933747	NA
WBGene00000022	WAGO Class 22G	abt-4, Y39D8C.1	57.34	68.59	32.2	36.46	-0.88	0.52	-1.68	0.0934528	NA
WBGene00166797	piRNA	21ur-5649, Y4C6B.47	34.64	60.46	2.15	32.52	-1.48	0.88	-1.68	0.0935014	NA
WBGene00049409	piRNA	21ur-4149, C35D6.45	2.39	24.42	0.72	3.94	-2.57	1.53	-1.68	0.0935442	NA
WBGene00016461	ALG Class 26G	C35E7.9	31.06	10.46	7.16	4.93	-1.77	1.06	-1.68	0.0935492	NA
AGCAGAAACTATATGGAACAT	23H-RNA	F39E9.29_region	0	0	5.01	4.93	4.52	2.7	1.68	0.093647	NA
WBGene00174695	piRNA	21ur-11071, Y37A1A.146	0	0	5.01	4.93	4.52	2.7	1.68	0.093647	NA
WBGene00046631	piRNA	21ur-515, Y73F8A.137	15.53	0	0	0.99	-4.13	2.47	-1.68	0.0937081	NA
WBGene00006784	WAGO Class 22G	T21C12.1, unc-49	5084.31	5509.68	5606	6033.02	0.14	0.08	1.67	0.0940313	0.4441
WBGene00047858	piRNA	21ur-3651, Y116A8C.109	168.44	217.41	157.43	109.37	-0.53	0.31	-1.67	0.0941513	0.444332
WBGene00002006	WAGO Class 22G	hsp-2, K09C4.3	1390.54	1313.77	1550.7	1524.27	0.19	0.11	1.67	0.0943832	0.444667
WBGene00006383	CSR Class 22G	taf-2, Y37E11B.4	741.86	904.52	995.4	951.8	0.24	0.14	1.67	0.0944002	0.444667
WBGene00011721	WAGO Class 22G	T11G6.7	206.67	115.1	109.49	102.47	-0.6	0.36	-1.67	0.0944351	0.444667
WBGene00046042	piRNA	21ur-2163, Y64G10A.31	19.11	8.14	0	4.93	-2.54	1.52	-1.67	0.0946787	NA
WBGene00022754	ALG target 22G	nspd-1, ZK484.8	7.17	3.49	0.72	0.99	-2.44	1.46	-1.67	0.0947515	NA
WBGene00022090	ALG target 22G	Y69A2AR.19	7.17	13.95	2.86	0	-2.8	1.68	-1.67	0.0948051	NA
WBGene00007493	CSR Class 22G	C09G9.2, npp-23	341.66	381.34	456.55	444.37	0.32	0.19	1.67	0.0948484	0.445241
WBGene00013442	CSR Class 22G	Y66D12A.16	68.09	87.2	124.51	115.28	0.63	0.38	1.67	0.094893	0.445241
WBGene00001394	WAGO Class 22G	fat-2, W02A2.1	303.43	259.27	376.4	344.86	0.36	0.22	1.67	0.0949099	0.445241
WBGene00016124	CSR Class 22G	C26B2.1, dnc-4	340.47	385.99	468.72	437.48	0.32	0.19	1.67	0.0950925	0.445241
WBGene00018456	WAGO Class 22G	F45D11.10, fbxc-39	2567.24	2964.69	2998.36	3205.19	0.16	0.1	1.67	0.0950969	0.445241
WBGene00013758	CSR Class 22G	fbxa-114, Y113G7B.7	123.05	95.34	183.19	137.94	0.56	0.34	1.67	0.0951712	0.445241
WBGene00015096	WAGO Class 22G	B0261.8	1056.04	1132.4	1293.09	1224.73	0.2	0.12	1.67	0.0951815	0.445241
WBGene00045512	WAGO Class 22G	Y60A3A.27	205.47	494.12	665.51	727.15	0.99	0.6	1.67	0.0951959	0.445241
WBGene00045512	ERGO Class 26G	Y60A3A.27	0	0	0	0	0.99	0.6	1.67	0.0951959	0.445241
WBGene00021546	CSR Class 22G	laat-1, Y43H11AL.2	23.89	36.04	70.13	46.31	0.96	0.58	1.67	0.0953281	NA
WBGene00012558	CSR Class 22G	rbm-7, Y37D8A.21	151.72	146.49	216.11	195.09	0.47	0.28	1.67	0.0954379	0.446041
WBGene00021332	WAGO Class 22G	Y34D9A.7	1013.04	1098.68	1154.26	1294.69	0.21	0.13	1.67	0.0956637	0.446564
WBGene00007680	WAGO Class 22G	C18D11.2, maa-1	4025.87	4497.03	4570.52	4845.73	0.14	0.09	1.67	0.0956923	0.446564
WBGene00047453	piRNA	21ur-802, Y57G11C.208	28.67	9.3	6.44	3.94	-1.86	1.11	-1.67	0.0957265	NA
WBGene00049071	piRNA	21ur-5407, B0513.30	2.39	0	8.59	10.84	3.03	1.82	1.67	0.0958157	NA
WBGene00004881	CSR Class 22G	smg-3, Y73B6BL.18	292.68	302.28	404.31	351.75	0.35	0.21	1.67	0.0958804	0.447109
WBGene00165108	piRNA	21ur-7545, M199.69	117.07	67.43	60.83	47.29	-0.77	0.46	-1.66	0.0959717	NA
WBGene00018304	WAGO Class 22G	agr-1, F41G3.12	642.71	833.6	889.49	879.88	0.26	0.16	1.66	0.0961565	0.448064
WBGene00050525	piRNA	21ur-917, Y116A8A.61	60.93	48.83	20.75	35.47	-0.98	0.59	-1.66	0.0962296	NA
WBGene00047447	piRNA	21ur-471, Y105C5A.208	22.7	20.93	2.86	10.84	-1.7	1.02	-1.66	0.096449	NA
WBGene00009380	WAGO Class 22G	F34H10.3	2075.06	2308.97	2463.09	2446.51	0.16	0.1	1.66	0.0964972	0.449317
WBGene00022168	CSR Class 22G	Y71H2AM.3	152.91	141.84	90.88	110.35	-0.55	0.33	-1.66	0.096651	0.449507
WBGene00002717	CSR Class 22G	C01G8.9, let-526	811.15	737.1	967.49	857.21	0.24	0.14	1.66	0.0966813	0.449507
CATGTATTAAACGGTAAGGGCCG	23H-RNA	mir-5592	3.58	9.3	0	0.99	-3.87	2.34	-1.66	0.0971207	NA
TGACATGGAGATTAGATAACA	23H-RNA	Y37E11B.2	3.58	9.3	0	0.99	-3.87	2.34	-1.66	0.0971207	NA
WBGene00077437	23H target 22G	Y59H11AR.6	6988.53	5954.97	5771.3	5938.43	-0.14	0.09	-1.66	0.0971331	0.450815
WBGene00077437	WAGO Class 22G	Y59H11AR.6	6988.53	5954.97	5771.3	5938.43	-0.14	0.09	-1.66	0.0971331	0.450815
WBGene00049252	piRNA	21ur-5230, C02B10.22	86.01	60.46	40.07	43.35	-0.81	0.49	-1.66	0.0971442	NA
WBGene00050774	piRNA	21ur-4838, Y105C5B.600	267.6	245.31	186.77	199.03	-0.41	0.25	-1.66	0.0971782	0.450815
WBGene00017419	WAGO Class 22G	F13B9.1, sec-16A.2	1127.72	1128.91	894.5	1045.41	-0.22	0.13	-1.66	0.0974553	0.451766
WBGene00021443	CSR Class 22G	Y39A3CL.7	357.19	295.31	415.76	407.92	0.34	0.2	1.66	0.0975528	0.451884
WBGene00009498	CSR Class 22G	F36H2.1, tat-5	312.99	315.07	412.18	378.36	0.33	0.2	1.66	0.0976826	0.452152
WBGene00009084	CSR Class 22G	F23B12.7	341.66	396.46	495.19	427.62	0.32	0.2	1.66	0.0977769	0.452254
WBGene00010942	CSR Class 22G	chch-3, M176.3	34.64	60.46	90.17	74.88	0.8	0.48	1.66	0.0979102	NA
WBGene00049125	piRNA	21ur-3964, Y64G10A.112	19.11	37.2	12.17	8.87	-1.41	0.85	-1.65	0.0980006	NA
WBGene00173544	piRNA	21ur-8862, Y57G11C.1037	26.28	8.14	5.01	3.94	-1.93	1.17	-1.65	0.0983681	NA
WBGene00022855	CSR Class 22G	tcer-1, ZK1127.9	297.46	390.64	440.81	430.58	0.34	0.21	1.65	0.0984121	0.454852
WBGene00173207	piRNA	21ur-6994, R05A10.109	33.45	39.53	15.74	16.75	-1.17	0.71	-1.65	0.0984409	NA
WBGene00010783	WAGO Class 22G	K11H3.6, mrpl-36	555.5	619.68	787.16	635.52	0.28	0.17	1.65	0.0984835	0.454852
GCTACACCTCTCATGACTCTT	23H-RNA	F31C3.9, rrn-3.1	4.78	8.14	17.17	24.63	1.69	1.02	1.65	0.0985128	NA
WBGene00021475	CSR Class 22G	tbca-1, Y39G10AR.20	28.67	45.34	66.55	67.99	0.86	0.52	1.65	0.0986691	NA
WBGene00012442	WAGO Class 22G	Y15E3A.3	1100.25	1141.7	1191.47	1408.98	0.21	0.13	1.65	0.098777	0.455872
MIMAT0006584	miRNA	miR-1817	249.68	133.7	135.25	124.15	-0.56	0.34	-1.65	0.0989819	0.456481
WBGene00015849	WAGO Class 22G	C16C8.11	1202.98	1149.84	1230.83	1505.54	0.22	0.13	1.65	0.0990931	0.456658
WBGene00165071	piRNA	21ur-6770, F58F9.12	8.36	6.98	1.43	0	-3.32	2.01	-1.65	0.0991504	NA
WBGene00166723	piRNA	21ur-7114, F26D12.42	0	11.63	12.17	34.49	1.99	1.21	1.65	0.0992717	NA
WBGene00168933	piRNA	21ur-10700, Y73F8A.744	0	0	0	11.82	4.76	2.89	1.65	0.0993221	NA
WBGene00008455	CSR Class 22G	E02H1.1	108.71	115.1	72.28	72.91	-0.62	0.38	-1.65	0.0993281	0.457135
WBGene00000820	WAGO Class 22G	csp-2, Y73B6BL.7	1273.47	1120.77	1020.44	1050.33	-0.21	0.13	-1.65	0.0993423	0.457135
WBGene00009412	ALG Class 26G	F35E2.5	47.78	11.63	5.72	7.88	-1.83	1.11	-1.65	0.0993709	NA
WBGene00010651	ALG Class 26G	K08C9.2	17.92	10.46	2.86	3.94	-2.07	1.26	-1.65	0.0994041	NA
WBGene00001225	CSR Class 22G	eif-3.B, Y54E2A.11	764.56	688.27	864.44	845.39	0.24	0.14	1.65	0.0996659	0.458288
WBGene00168313	piRNA	21ur-8102, Y116A8C.290	41.81	58.13	22.9	27.59	-0.99	0.6	-1.65	0.0997191	NA
WBGene00000913	CSR Class 22G	daf-18, T07A9.6	820.7	830.11	946.02	975.45	0.22	0.13	1.65	0.0998376	0.45854
WBGene00047072	piRNA	21ur-994, Y57G11C.173	21.5	25.58	2.15	12.81	-1.69	1.03	-1.65	0.099872	NA
WBGene00017942	ERGO Class 26G	F31A9.4, fbxc-37	1093.08	1099.84	896.64	997.13	-0.21	0.13	-1.64	0.0999775	0.45854
WBGene00017942	WAGO Class 22G	F31A9.4, fbxc-37	218.62	280.19	139.54	177.35	-0.21	0.13	-1.64	0.0999775	0.45854
WBGene00019035	WAGO Class 22G	F58E1.3, fbxb-26	725.13	774.31	858	901.55	0.23	0.14	1.64	0.100013	0.45854
WBGene00010804	WAGO Class 22G	M01E5.1	25.09	16.28	10.02	0.99	-1.87	1.14	-1.64	0.100028	NA
MIMAT0000023	miRNA	miR-52-5p	17025.7	16770.9	16405.8	14767.7	-0.12	0.07	-1.64	0.100102	0.458549
WBGene00003062	CSR Class 22G	K09H9.6, lpd-6	235.34	295.31	369.25	318.25	0.38	0.23	1.64	0.100161	0.458549
WBGene00017808	ALG target 22G	F26A1.10, nspd-9	0	0	2.86	6.9	4.49	2.73	1.64	0.100249	NA
WBGene00046249	piRNA	21ur-1283, F55B11.14	34.64	27.9	10.02	15.76	-1.29	0.78	-1.64	0.10035	NA
WBGene00006599	WAGO Class 22G	B0545.1, tpa-1	114.68	108.12	68.7	75.87	-0.63	0.38	-1.64	0.100384	0.458987
WBGene00020284	CSR Class 22G	mel-46, T06A10.1	1216.12	1180.06	1384.68	1346.91	0.19	0.12	1.64	0.10042	0.458987
WBGene00003063	CSR Class 22G	lpd-7, R13A5.12	836.23	770.82	1036.19	861.16	0.24	0.15	1.64	0.100476	0.458987
WBGene00019578	WAGO Class 22G	K09E3.7	649.87	527.83	501.63	459.15	-0.29	0.18	-1.64	0.100766	0.459323
WBGene00001902	WAGO Class 22G	his-28, K06C4.2	80.04	98.82	135.96	131.05	0.58	0.35	1.64	0.10077	0.459323
WBGene00001924	WAGO Class 22G	F07B7.9, his-50	80.04	98.82	135.96	131.05	0.58	0.35	1.64	0.10077	0.459323
WBGene00020661	ALG Class 26G	smz-2, T21G5.4	4.78	4.65	0	0	3.01	1.84	1.64	0.100964	NA
WBGene00021486	ALG target 22G	lbp-9, Y40B10A.1	81.23	69.76	80.86	96.56	-3.33	2.03	-1.64	0.101083	NA
WBGene00050552	piRNA	21ur-1791, Y41E3.202	10.75	4.65	1.43	0	-3.33	2.03	-1.64	0.101083	NA
WBGene00001955	WAGO Class 22G	F58A4.7, hlh-11	2063.11	2450.81	2459.51	2641.6	0.18	0.11	1.64	0.101205	0.460814
WBGene00004951	WAGO Class 22G	K10B3.10, spc-1	501.74	433.66	342.06	407.92	-0.32	0.2	-1.64	0.101244	0.460814
WBGene00172296	piRNA	21ur-8767, Y105C5A.1070	15.53	4.65	2.15	0.99	-2.66	1.62	-1.64	0.101694	NA
WBGene00021333	WAGO Class 22G	Y34D9A.8	1840.91	1968.32	2027.29	2267.18	0.17	0.11	1.64	0.101939	0.46364
WBGene00047007	piRNA	21ur-284, Y64G10A.52	7.17	9.3	0	1.97	-3.16	1.93	-1.63	0.102077	NA
WBGene00007735	ALG target 22G	C25G4.8	45.4	61.62	72.28	67.99	-4.74	2.9	-1.63	0.102085	NA
WBGene00049341	piRNA	21ur-2951, Y57G11C.358	4.78	3.49	0	0	-4.74	2.9	-1.63	0.102085	NA
WBGene00050351	piRNA	21ur-2071, Y73F8A.451	4.78	3.49	0	0	-4.74	2.9	-1.63	0.102085	NA
WBGene00174370	piRNA	21ur-7619, Y105C5B.1360	4.78	3.49	0	0	-4.74	2.9	-1.63	0.102085	NA
WBGene00010828	CSR Class 22G	M02B1.3	41.81	62.78	97.32	77.84	0.75	0.46	1.63	0.102241	NA
WBGene00018586	CSR Class 22G	F48A11.5, ubxn-3	315.38	397.62	498.06	403.97	0.34	0.21	1.63	0.102254	0.464736
WBGene00008125	ALG Class 26G	C47A4.5	22.7	16.28	4.29	7.88	-1.7	1.04	-1.63	0.102487	NA
WBGene00050036	piRNA	21ur-1734, Y57G11C.419	14.34	9.3	0.72	3.94	-2.4	1.47	-1.63	0.102578	NA
WBGene00016553	ERGO target 22G	C40A11.10, mir-8199	399	619.68	662.64	791.2	0.5	0.31	1.63	0.102598	0.465794
WBGene00009521	CSR Class 22G	F38A1.8	200.7	296.47	334.18	322.19	0.4	0.25	1.63	0.102635	0.465794
WBGene00015089	ALG Class 26G	B0252.5	7.17	12.79	0	2.96	-2.84	1.74	-1.63	0.102847	NA
WBGene00046093	piRNA	21ur-2297, Y73F8A.87	3.58	4.65	0	0	-4.74	2.9	-1.63	0.102869	NA
WBGene00048013	piRNA	21ur-3598, F55B11.33	3.58	4.65	0	0	-4.74	2.9	-1.63	0.102869	NA
WBGene00049733	piRNA	21ur-970, Y65A5A.12	3.58	4.65	0	0	-4.74	2.9	-1.63	0.102869	NA
WBGene00049335	piRNA	21ur-3857, Y105C5B.432	113.49	115.1	72.99	76.85	-0.61	0.37	-1.63	0.10294	0.465803
WBGene00047311	piRNA	21ur-743, C08F11.31	28.67	68.59	20.75	25.62	-1.07	0.66	-1.63	0.102998	NA
WBGene00003784	CSR Class 22G	nos-2, ZK1127.1	59.73	124.4	127.38	161.59	0.65	0.4	1.63	0.103028	0.465803
WBGene00012156	CSR Class 22G	ebp-2, VW02B12L.3	381.08	384.83	480.88	461.12	0.3	0.18	1.63	0.103033	0.465803
WBGene00012156	ALG Class 26G	ebp-2, VW02B12L.3	5.97	2.33	3.58	10.84	0.3	0.18	1.63	0.103033	0.465803
WBGene00013002	CSR Class 22G	Y48E1B.3	203.09	279.03	299.12	335.99	0.4	0.24	1.63	0.103073	0.465803
WBGene00006523	CSR Class 22G	F26G5.9, tam-1	2796.61	2853.08	3049.88	3186.47	0.14	0.09	1.63	0.103083	0.465803
WBGene00048792	piRNA	21ur-2413, R05A10.43	3.58	1.16	5.72	19.71	2.42	1.48	1.63	0.103154	NA
ACGTGTTCCAGCATTCTTCGAC	23H-RNA	Y37E3.30	4.78	10.46	1.43	0	-3.31	2.03	-1.63	0.103206	NA
WBGene00011027	ALG Class 26G	R05D7.2	16.72	2.33	0.72	1.97	-2.86	1.76	-1.63	0.103214	NA
WBGene00022272	WAGO Class 22G	Y73E7A.5	3020	3017.01	3176.54	3509.65	0.15	0.09	1.63	0.103264	0.466286
ATGGCTGCGGCGAGGATGATG	23H-RNA	Y57G11C.1145_hairpin	5.97	2.33	0	0	-4.75	2.91	-1.63	0.10331	NA
ATGGCTGCGGCGAGGATGATGT	23H-RNA	Y57G11C.1145_hairpin	5.97	2.33	0	0	-4.75	2.91	-1.63	0.10331	NA
WBGene00047379	piRNA	21ur-465, Y37A1B.64	5.97	2.33	0	0	-4.75	2.91	-1.63	0.10331	NA
WBGene00049793	piRNA	21ur-1052, AC7.16	5.97	2.33	0	0	-4.75	2.91	-1.63	0.10331	NA
WBGene00170882	piRNA	21ur-10841, Y57G11C.878	5.97	2.33	0	0	-4.75	2.91	-1.63	0.10331	NA
WBGene00171766	piRNA	21ur-10767, H32C10.74	5.97	2.33	0	0	-4.75	2.91	-1.63	0.10331	NA
WBGene00022888	ALG target 22G	rnh-1.1, ZK1290.6	2.39	3.49	3.58	1.97	-4.75	2.91	-1.63	0.10331	NA
WBGene00049569	piRNA	21ur-4779, Y105C5B.470	17.92	1.16	1.43	0.99	-2.96	1.82	-1.63	0.103411	NA
WBGene00012111	CSR Class 22G	T28A8.5	683.32	653.4	732.06	858.2	0.25	0.15	1.63	0.103517	0.46676
WBGene00006958	CSR Class 22G	R06C1.3, wve-1	206.67	242.99	331.32	261.11	0.4	0.25	1.63	0.103518	0.46676
WBGene00016937	WAGO Class 22G	C54H2.3, tag-294	292.68	287.17	354.94	378.36	0.34	0.21	1.63	0.1036	0.466797
WBGene00021839	WAGO Class 22G	nduf-5, Y54E10BL.5	207.86	236.01	322.02	261.11	0.4	0.24	1.63	0.103779	0.467268
WBGene00048120	piRNA	21ur-3210, C52D10.34	17.92	33.72	7.16	11.82	-1.46	0.9	-1.63	0.103998	NA
WBGene00000535	WAGO Class 22G	cpi-1, K08B4.6	59.73	49.99	75.85	105.43	0.72	0.44	1.63	0.104061	NA
WBGene00015102	CSR Class 22G	B0280.5, cpg-2	152.91	196.48	256.18	217.75	0.44	0.27	1.62	0.10444	0.469906
WBGene00049532	piRNA	21ur-5101, Y64G10A.121	126.63	80.22	70.84	57.15	-0.69	0.42	-1.62	0.10453	0.469974
CATTTTTGGTAAGCAGAACTGGC	23H-RNA	F31C3.9, rrn-3.1	198.31	222.06	140.26	167.5	-0.45	0.28	-1.62	0.10487	0.470918
WBGene00047722	piRNA	21ur-2686, Y65A5A.8	407.37	434.82	392.15	255.19	-0.37	0.23	-1.62	0.104905	0.470918
WBGene00009180	CSR Class 22G	F26H11.2, nurf-1	1772.82	1836.95	2073.09	1968.64	0.16	0.1	1.62	0.104965	0.470918
WBGene00004729	CSR Class 22G	sax-3, ZK377.2	27.48	23.25	58.68	41.38	0.98	0.61	1.62	0.105061	NA
WBGene00007699	ALG Class 26G	C24H11.1	5.97	0	0.72	0.99	4.45	2.75	1.62	0.105122	NA
WBGene00047856	piRNA	21ur-3398, Y45F10B.26	0	0	3.58	5.91	4.45	2.75	1.62	0.105122	NA
WBGene00045639	piRNA	21ur-1324, H12I19.12	154.11	188.35	134.53	104.44	-0.52	0.32	-1.62	0.105274	0.471965
WBGene00009416	ALG Class 26G	F35E2.9	119.46	103.47	67.27	61.09	-1.47	0.91	-1.62	0.105302	NA
WBGene00048087	piRNA	21ur-618, F44E8.12	15.53	44.18	14.31	7.88	-1.42	0.87	-1.62	0.105313	NA
WBGene00049919	piRNA	21ur-494, Y73F8A.409	4.78	18.6	3.58	0	-2.64	1.63	-1.62	0.105391	NA
WBGene00049109	piRNA	21ur-2325, Y105C5A.360	11.95	1.16	0	0.99	-3.89	2.4	-1.62	0.105432	NA
WBGene00001911	WAGO Class 22G	C50F4.7, his-37	893.58	930.1	1086.99	1020.78	0.21	0.13	1.62	0.105453	0.472121
WBGene00007099	WAGO Class 22G	B0024.9, trx-2	766.95	680.14	809.34	899.58	0.24	0.15	1.62	0.105459	0.472121
WBGene00001793	CSR Class 22G	gsy-1, Y46G5A.31	371.53	469.7	495.91	545.86	0.31	0.19	1.62	0.105616	0.472351
WBGene00020397	WAGO Class 22G	pcbd-1, T10B11.1	97.96	112.77	125.95	185.24	0.56	0.34	1.62	0.105661	0.472351
TGAAGACATCTCAGAAACATC	23H-RNA	F43E2.6	2.39	5.81	0	0	-4.73	2.92	-1.62	0.105677	NA
WBGene00171249	piRNA	21ur-6000, Y51H4A.725	2.39	5.81	0	0	-4.73	2.92	-1.62	0.105677	NA
WBGene00171269	piRNA	21ur-6684, Y37A1B.270	2.39	5.81	0	0	-4.73	2.92	-1.62	0.105677	NA
WBGene00172900	piRNA	21ur-10263, Y4C6B.79	2.39	5.81	0	0	-4.73	2.92	-1.62	0.105677	NA
WBGene00019569	WAGO Class 22G	K09D9.12	370.33	388.32	493.76	441.42	0.3	0.19	1.62	0.105849	0.472681
WBGene00004315	CSR Class 22G	rbd-1, T23F6.4	614.04	741.75	849.41	765.58	0.25	0.16	1.62	0.105886	0.472681
WBGene00174002	piRNA	21ur-6611, R05A10.112	17.92	18.6	4.29	6.9	-1.72	1.06	-1.62	0.105902	NA
WBGene00011320	CSR Class 22G	T01C3.3	807.56	680.14	902.37	852.29	0.24	0.15	1.62	0.105979	0.472758
WBGene00046254	piRNA	21ur-1273, Y105C5B.97	420.51	503.42	412.18	319.24	-0.33	0.21	-1.62	0.106244	0.473331
WBGene00018224	WAGO Class 22G	bath-18, F40B1.2	332.1	327.86	264.06	253.22	-0.35	0.22	-1.62	0.106258	0.473331
WBGene00001505	ALG Class 26G	fut-1, K08F8.3	9.56	0	0	0	-4.95	3.07	-1.61	0.106417	NA
WBGene00047276	piRNA	21ur-1448, Y116A8C.92	9.56	0	0	0	-4.95	3.07	-1.61	0.106417	NA
WBGene00167774	piRNA	21ur-10358, C55C3.39	9.56	0	0	0	-4.95	3.07	-1.61	0.106417	NA
WBGene00174344	piRNA	21ur-11510, F26D12.89	9.56	0	0	0	-4.95	3.07	-1.61	0.106417	NA
WBGene00018284	ALG target 22G	F41E6.1	2.39	0	0	0	-4.95	3.07	-1.61	0.106417	NA
WBGene00008166	CSR Class 22G	C47G2.5, saps-1	1394.12	1450.96	1663.77	1553.82	0.18	0.11	1.61	0.10643	0.473759
WBGene00049963	piRNA	21ur-5128, H32C10.19	32.25	20.93	8.59	11.82	-1.39	0.86	-1.61	0.106509	NA
WBGene00013062	WAGO Class 22G	Y51A2A.6	1051.27	935.91	827.95	878.89	-0.22	0.14	-1.61	0.106567	0.47387
WBGene00001233	CSR Class 22G	eif-3.K, T16G1.11	72.87	106.96	141.69	128.09	0.59	0.36	1.61	0.106668	0.47387
WBGene00019250	WAGO Class 22G	H28G03.2	652.26	652.23	561.74	531.08	-0.25	0.16	-1.61	0.106686	0.47387
WBGene00047682	piRNA	21ur-4465, Y10G11A.14	157.69	241.83	132.39	150.75	-0.5	0.31	-1.61	0.106757	0.47387
WBGene00017080	WAGO Class 22G	DC2.3, lec-12	1484.91	1568.38	1706.7	1732.16	0.17	0.11	1.61	0.106903	0.474095
WBGene00004095	CSR Class 22G	F52C9.8, pqe-1	956.89	946.38	1092.72	1096.64	0.2	0.13	1.61	0.106959	0.474095
WBGene00019678	CSR Class 22G	K12H4.3	332.1	419.71	509.51	431.56	0.33	0.2	1.61	0.107049	0.474161
WBGene00000775	WAGO Class 22G	cpin-1, F38E11.3	855.35	940.56	988.24	1102.56	0.22	0.14	1.61	0.107199	0.474491
WBGene00047922	piRNA	21ur-3020, Y64G10A.79	7.17	4.65	0.72	0	-3.86	2.4	-1.61	0.107277	NA
WBGene00018439	WAGO Class 22G	F45C12.8, fbxa-184	2020.1	1842.76	1638	1788.33	-0.17	0.11	-1.61	0.1073	0.474601
WBGene00007943	WAGO Class 22G	C34F6.9	290.29	277.87	189.63	243.37	-0.4	0.25	-1.61	0.107378	0.474613
WBGene00012249	ALG target 22G	W04E12.4	0	1.16	0	4.93	0.8	0.5	1.61	0.107443	NA
WBGene00004824	CSR Class 22G	F56B3.4	226.98	180.21	301.98	240.41	0.42	0.26	1.61	0.107495	0.474793
WBGene00047226	piRNA	21ur-3322, Y67A10A.53	19.11	10.46	5.72	0.99	-2.1	1.3	-1.61	0.107687	NA
WBGene00016635	ERGO target 22G	C44B11.6	4076.05	3735.51	3040.58	3323.43	-0.72	0.45	-1.61	0.107699	NA
WBGene00172185	piRNA	21ur-7157, Y105C5B.1176	0	3.49	14.31	7.88	2.67	1.66	1.61	0.107787	NA
WBGene00169647	piRNA	21ur-11028, F55B11.100	19.11	24.42	10.73	2.96	-1.64	1.02	-1.61	0.107893	NA
CGACGATGGCTGCGGCGAGGATGA	23H-RNA	Y57G11C.1145_hairpin	7.17	1.16	0	0	-4.75	2.96	-1.61	0.108091	NA
WBGene00049431	piRNA	21ur-2382, Y73F8A.374	7.17	1.16	0	0	-4.75	2.96	-1.61	0.108091	NA
WBGene00166407	piRNA	21ur-8087, C52D10.66	7.17	1.16	0	0	-4.75	2.96	-1.61	0.108091	NA
WBGene00169921	piRNA	21ur-8034, C52D10.90	7.17	1.16	0	0	-4.75	2.96	-1.61	0.108091	NA
WBGene00018014	CSR Class 22G	F33G12.2, wdr-83	72.87	61.62	113.06	96.56	0.64	0.4	1.61	0.108216	0.477643
WBGene00015461	CSR Class 22G	C05C8.2, krr-1	267.6	320.88	385.71	359.64	0.34	0.21	1.61	0.10832	0.477768
WBGene00047314	piRNA	21ur-483, Y73F8A.188	4.78	6.98	0.72	0	-3.85	2.4	-1.61	0.108331	NA
WBGene00006385	CSR Class 22G	R119.6, taf-4	400.2	316.23	452.97	441.42	0.32	0.2	1.61	0.108402	0.477792
WBGene00001088	CSR Class 22G	dpy-30, ZK863.6	124.24	176.72	241.16	180.31	0.49	0.3	1.6	0.108556	0.477856
WBGene00004952	CSR Class 22G	spd-1, Y34D9A.4	2157.49	2140.39	2528.21	2269.16	0.16	0.1	1.6	0.108569	0.477856
WBGene00172045	piRNA	21ur-6339, Y105C5B.1167	8.36	3.49	0.72	0	-3.86	2.41	-1.6	0.108594	NA
WBGene00009385	CSR Class 22G	F35B12.5, sas-5	555.5	576.66	669.8	675.92	0.25	0.16	1.6	0.108645	0.477856
TGTATTAAACGGTAAGGGCCGG	23H-RNA	mir-5592	8.36	11.63	2.86	0	-2.73	1.7	-1.6	0.108675	NA
WBGene00012860	WAGO Class 22G	acdh-11, Y45F3A.3	364.36	395.29	422.2	524.18	0.31	0.2	1.6	0.108897	0.478439
WBGene00077756	WAGO Class 22G	Y11D7A.19	1662.91	2125.28	2108.15	2227.77	0.19	0.12	1.6	0.109002	0.478439
WBGene00003009	CSR Class 22G	K10B2.1, lin-23	310.6	326.7	431.51	367.52	0.33	0.2	1.6	0.109035	0.478439
WBGene00010100	ERGO target 22G	F55C9.3	855.35	878.94	1029.75	1126.2	0.41	0.26	1.6	0.109083	0.478439
WBGene00006053	ALG Class 26G	ssq-4, T28H11.1	26.28	16.28	20.75	3.94	-2.26	1.41	-1.6	0.109207	NA
WBGene00174466	piRNA	21ur-5574, F55B11.129	163.66	120.91	97.32	96.56	-0.55	0.35	-1.6	0.10927	0.478926
WBGene00017037	CSR Class 22G	D1069.3	99.15	131.38	153.14	177.35	0.52	0.32	1.6	0.109433	0.479304
WBGene00000294	WAGO Class 22G	cas-1, F41G4.2	354.8	339.49	295.54	248.3	-0.35	0.22	-1.6	0.109569	0.479564
WBGene00169874	piRNA	21ur-12764, Y116A8A.96	1.19	11.63	0	0.99	-3.86	2.41	-1.6	0.109721	NA
WBGene00014914	WAGO Class 22G	Y52B11A.11	17360.2	16811.6	15576.4	16254.6	-0.1	0.06	-1.6	0.109746	0.479924
WBGene00169556	piRNA	21ur-6254, C11D2.65	80.04	82.55	52.24	46.31	-0.72	0.45	-1.6	0.109809	NA
WBGene00003133	CSR Class 22G	mat-2, W10C6.1	1114.58	1221.92	1344.61	1321.29	0.19	0.12	1.6	0.109811	0.479924
WBGene00019131	WAGO Class 22G	bath-12, F59H5.3	3397.5	3399.52	3661	3785.54	0.13	0.08	1.6	0.109881	0.479924
WBGene00165903	piRNA	21ur-6442, Y57G11C.548	13.14	4.65	0.72	1.97	-2.77	1.73	-1.6	0.110024	NA
WBGene00002986	CSR Class 22G	C07H6.1, lig-4	453.96	398.78	348.5	337.96	-0.31	0.2	-1.6	0.110227	0.480573
WBGene00015562	WAGO Class 22G	C07D8.2	1034.54	932.43	847.98	846.38	-0.21	0.13	-1.6	0.11027	0.480573
WBGene00022232	CSR Class 22G	exos-2, Y73B6BL.3	322.55	274.38	357.8	397.08	0.34	0.21	1.6	0.110286	0.480573
WBGene00006941	CSR Class 22G	C46C2.1, wnk-1	1132.5	1017.3	1168.57	1311.44	0.21	0.13	1.6	0.110396	0.480573
WBGene00017778	CSR Class 22G	F25B5.7, nono-1	108.71	108.12	164.59	144.84	0.51	0.32	1.6	0.110412	0.480573
WBGene00171923	piRNA	21ur-8162, T12E12.37	11.95	9.3	2.15	1.97	-2.36	1.48	-1.6	0.110545	NA
WBGene00045726	piRNA	21ur-4151, Y43D4A.12	23.89	17.44	7.87	5.91	-1.58	0.99	-1.6	0.110599	NA
WBGene00021097	CSR Class 22G	cdc-37, W08F4.8	301.04	333.67	445.1	355.69	0.34	0.21	1.59	0.1108	0.481594
[truncated: 23,901 more rows]
