# Supplementary material for: A low-abundance class of Dicer-dependent siRNAs produced from a variety of features in C. elegans
Source: HighWire-hosted journal article supplement (doi:10.1101/gr.279083.124), 2024-12-01
Supplement: Supplemental_Table_S5.xlsx [file Supplemental_Table_S5.xlsx]

## Sheet: Table S5
Supplemental Table S5. RPM-normalized sRNA-seq read counts from various developmental stages and mutants.
Feature ID	Classifier	Feature Name		eggs rep 1	eggs rep 2	L4 rep 1	L4 rep 2	L4 rep 3	adults rep 1	adults rep 2	adults rep 3	gonads rep 1	gonads rep 2	gonads rep 3		wild type rep 1	wild type rep 2	wild type rep 3	rde-1 rep 1	rde-1 rep 2	rde-1 rep 3		wild type rep 1	wild type rep 2	wild type rep 3	mut-14 smut-1 rep 1	mut-14 smut-1 rep 2	prg-1 rep 1	prg-1 rep 2	prg-1 rep 3		wt rep 1	wt rep 2	wt rep 3	ergo-1 rep 1	ergo-1 rep 2	ergo-1 rep 3
TTTGCCGATGTTTCTGAGATGTC	23H-RNA	F43E2.6		350.32	341.73	258.5	264.98	269.26	131.12	170.88	119.76	14.8	23.24	14.68		131.12	170.88	119.76	236.85	177.6	234.64		68.27	65.02	70.77	197.32	239.23	89.42	82.89	86.25		88.25	78.36	76.9	100.53	88.15	94.43
CATCTCAGAAACATCGGCAAATG	23H-RNA	F43E2.6		63.02	60.85	39.82	38.95	33.07	27.42	21.16	21.31	1.22	3.06	2.04		27.42	21.16	21.31	41.93	55.6	50.94		13.93	15.45	19.18	38.26	40.94	21.14	18.1	21.31		15.74	12.88	11.3	14.53	17	13.55
TTTGCCGATGTTTCTGAGATGTCT	23H-RNA	F43E2.6		42.95	39.59	20.74	15.31	19.2	9.77	11.26	7.55	1.92	1.69	1.16		9.77	11.26	7.55	39.25	29.85	58.8		3.72	4.89	4.54	11.75	15.68	5.79	4.32	4.85		10.61	11.02	11.49	10.93	11.64	9.71
TTTGCCGATGTTTCTGAGATGT	23H-RNA	F43E2.6		38.9	34.99	89.69	66.87	74.9	18	19.8	13.58	0.7	0.85	2.18		18	19.8	13.58	7.54	5.33	6.76		8	7.46	9.97	32.26	50.31	15.36	12.5	11.92		31.3	28.53	28.05	30.22	31.42	25.88
AGTGGAGTGGATGACGACGACG	23H-RNA	Y57G11C.1145_hairpin, Y57G11C.51		15.62	19.86	3.14	2.71	3.07	8.79	6.05	4.18	3.66	4.65	2.91		8.79	6.05	4.18	9.51	7.95	9.37		5.24	2.93	6.06	14	13.75	6.73	5.15	3.33		6.01	4.93	4.56	6.72	7.21	5.66
AGTGGAGTGGATGACGACGACGA	23H-RNA	Y57G11C.1145_hairpin		17.64	14.81	2.11	3.63	2.61	12.66	10.31	6.21	5.4	8.87	6.25		12.66	10.31	6.21	18.04	17.66	25.37		8	8.62	11.98	27.51	29.03	11.22	9.37	9.19		13.44	16.46	13.29	15.34	14.97	14.96
TACAACGTGGAGCTAAGACACCC	23H-RNA	F55C9.3		7.95	8.05	0	0.14	0.06	0.14	0.3	0.23	0	0	0		0.14	0.3	0.23	0.07	0.14	0.07		0.28	0.44	0.13	0.25	0	0.35	0.37	0.4		0	0	0	0	0.18	0
TGCCGATGTTTCTGAGATGTCTT	23H-RNA	F43E2.6		15.69	10.28	7.43	9.04	9.63	5.06	4.27	5.05	0	0.11	0.87		5.06	4.27	5.05	4.58	2.62	4.89		1.24	0.8	1.26	3.5	4.48	1.42	1.19	1.82		1.06	1.36	0.77	1.4	1.48	1.62
TGCCGATGTTTCTGAGATGTCT	23H-RNA	F43E2.6		10.53	6.45	4.48	6.69	6.27	4.36	5.04	4.47	0	0.32	0		4.36	5.04	4.47	5.43	3.76	6.55		1.93	0.8	0.25	2.25	2.95	0.95	0.92	0.81		2.65	1.71	1.8	2.41	1.66	2.63
ATTTGCCGATGTTTCTGAGATGT	23H-RNA	F43E2.6		4.95	4.15	2.82	2.99	2.2	0.63	0.65	0.29	0.35	0.21	0.15		0.63	0.65	0.29	0.78	0.76	0.62		0.41	0.44	0.5	1.25	1.73	0.95	1.29	1.01		3.89	2.92	2.18	2.96	3.7	2.43
TCCGGTTCAGAGCAGATGACA	23H-RNA	Y17D7C.3		3.76	6	0.13	0.43	0.17	0.21	0.47	0.17	0	0	0		0.21	0.47	0.17	0	0	0.07		0	0.18	0.13	0	0	0.35	0.09	0.61		0	0	0.06	0.1	0.37	0.2
ACATCTCAGAAACATCGGCAAAT	23H-RNA	F43E2.6		5.37	4.66	1.79	1.99	1.39	0.98	0.47	0.17	0.17	0	0.15		0.98	0.47	0.17	0.92	0.62	0.97		0	0.44	0.5	0.75	0.2	0.47	0.64	0.61		1.77	1.41	1.35	1.55	0.92	2.83
ATTGTGAAGACATCTCAGAAAC	23H-RNA	F43E2.6		3.07	4.66	1.02	0.57	0.52	0.91	0.89	0.99	0	0	0.15		0.91	0.89	0.99	0.49	0.9	0.69		0.55	1.15	0.76	2	1.32	0.95	0.64	1.31		0.88	0.81	0.45	0.8	0.18	0.4
TTTTGCTGATCTCTCTTCTCGG	23H-RNA	ChrIII_hairpin1		3.14	4.98	0.26	0.07	0.23	0.7	0.65	0.58	0	0.21	0.15		0.7	0.65	0.58	1.13	1.09	1.93		0.69	0.62	0.5	0.5	0.71	0.83	0.55	0.5		0.18	0.1	0.06	0.15	0	0.2
CTCCTCGGTCTTGACGAAATCCC	23H-RNA	C36A4.14		2.86	3.19	0.26	0	0.17	0.07	0.12	0	0	0	0		0.07	0.12	0	0	0.05	0		0	0.09	0	0	0	0	0.09	0		0	0	0	0.05	0	0
TTTGCCGATGTTTCTGAGATG	23H-RNA	F43E2.6		2.44	3.83	13.44	10.68	11.72	5.2	4.8	4.24	0.7	0.42	0		5.2	4.8	4.24	1.55	1.67	3.65		1.93	2.31	2.27	6.5	11	3.54	3.22	2.63		4.07	3.37	3.21	4.26	2.4	2.43
TGGAGTGGATGACGACGACGAT	23H-RNA	Y57G11C.1145_hairpin		1.67	2.75	0.13	0.36	0.12	0.98	1.19	0.75	0.7	0.32	0.29		0.98	1.19	0.75	1.2	1	0.9		0.41	0.44	0.76	0.25	1.02	0.35	0.64	0.71		1.24	1.96	2.57	2.15	2.22	2.02
AATCGGAAACTCAAAGACCACA	23H-RNA	Y17D7C.3		3.07	4.15	0	0	0.17	0.14	0.3	0.35	0	0	0		0.14	0.3	0.35	0.21	0.19	0.07		0.28	0.62	0.76	0	0	0.95	0.09	0.2		0	0.05	0.06	0	0	0.2
CAACGTCTCGGCTAGCCACCT	23H-RNA	T05E12.8		1.25	2.23	0	0	0	0.07	0.24	0.23	0	0	0		0.07	0.24	0.23	0.21	0.1	0.14		0	0.09	0.25	0	0	0.24	0.09	0		0	0.05	0	0	0	0
AATTGTGAAGACATCTCAGAAAC	23H-RNA	F43E2.6		3.69	3.45	0.9	1.71	0.87	0.49	0.41	0.58	0	0	0		0.49	0.41	0.58	0.7	0.81	1.17		0.69	1.51	2.02	2	2.95	2.13	1.19	1.62		0.18	0.25	0.51	0.75	0.37	0.61
TGGAGTGGATGACGACGACGA	23H-RNA	Y57G11C.1145_hairpin		1.6	2.43	0.77	0.85	0.17	1.97	2.13	1.8	0.7	0.11	0.44		1.97	2.13	1.8	1.48	1.71	1.38		0.69	0.62	0.25	1.75	1.32	0.71	0.64	0.5		0.71	0.96	0.58	0.8	1.29	0.4
CACGGGGCGATCCAAGAACCT	23H-RNA	Y81B9A.5		3	6.19	0.83	0.78	0.52	0.42	0.24	0.29	0	0	0		0.42	0.24	0.29	0.28	0.14	0.28		0	0.09	0.25	0.75	0.61	0.24	0.46	0.2		0.35	0.1	0.32	0.05	0.37	0
CATCTCAGAAACATCGGCAAAT	23H-RNA	F43E2.6		5.51	4.92	1.22	1.92	1.22	0.77	0.41	0.46	0	0	0.29		0.77	0.41	0.46	1.97	3.71	2.55		0.41	0.27	1.01	1.75	1.73	0.71	0.28	1.41		2.48	1.01	1.48	2.1	1.48	1.21
ATCGGACGAGCTCTTATCCCCT	23H-RNA	T05E12.8		2.16	2.43	0	0	0	0.21	0.59	0.46	0.17	0.21	0		0.21	0.59	0.46	0.49	0.33	0.28		0.83	0.27	0.25	0	0	0.12	0.09	0.1		0.53	0.25	0.13	0.1	0.55	0
TCAATGACGGAGTCGAGATCGAC	23H-RNA	Y37E11B.2		4.6	6.13	0.32	0.36	0.29	0.35	0.65	0.35	0	0	0		0.35	0.65	0.35	0.85	0.1	0.28		0.14	0.18	0.5	0	0.1	0.47	0.64	0.61		0.18	0.25	0	0.25	0.37	1.21
ATTTGCCGATGTTTCTGAGATGTC	23H-RNA	F43E2.6		1.88	2.55	0.7	0.64	0.41	0.63	0.59	0.41	0.17	0	0		0.63	0.59	0.41	0	0.19	0.55		0	0.18	0.25	0.75	0.92	1.06	0.18	0.5		0.35	0.55	0.45	0.3	0.55	0
TAGACGGTGTGGGTCAACGAGC	23H-RNA	T05E12.8		1.81	1.98	0	0	0	0.28	0.3	0.46	0	0.21	0		0.28	0.3	0.46	0.35	0.05	0.41		0.28	0.62	0.5	0.25	0	0.12	0	0		0	0.05	0.26	0.2	0	0
AACCGGACCCTGCCTCTTCATC	23H-RNA	Y57G11C.1145_hairpin		1.19	1.53	0.64	1.5	1.04	0.07	0.36	0.23	0.35	0.21	0.15		0.07	0.36	0.23	0.78	0.67	0.76		1.38	1.6	2.02	2.75	3.16	2.24	1.38	0.3		0.35	0.1	0.06	0.1	0	0.2
TTTGGCATCGCCCGTGGTATTCC	23H-RNA	T05E12.8		3.63	4.21	0	0	0	0.21	0.3	0.52	0	0	0		0.21	0.3	0.52	0.14	0.05	0.07		0.28	0.27	0.13	0	0	0.12	0.18	0.2		0	0	0	0.05	0	0
TGTTTGATACCTGGACTCTTTCC	23H-RNA	E01G4.7		3.35	2.68	0	0	0	0	0.36	0.06	0	0	0.15		0	0.36	0.06	0.07	0.1	0.07		0.55	0.36	0.38	0	0.1	0.24	0.55	0.1		0	0	0.13	0	0	0
AGTGGAGTGGATGACGACGACGG	23H-RNA	Y57G11C.51		0.07	0.51	0.19	0	0	0.98	0	0	0.87	0.21	0		0.98	0	0	0.49	0.14	0.14		1.1	0.09	0.13	0	0.41	0.59	0.18	0		0.53	0.5	0.83	0.65	0.74	0.81
TCTTTCATCGTACGACGCTGTT	23H-RNA	F52G3.8		1.81	1.6	0	0	0	0.28	0.53	0.17	0.52	0.11	0		0.28	0.53	0.17	0.14	0.05	0.41		0.14	0.53	0.63	0	0	0.12	0.09	0.1		0	0.05	0.19	0.3	0.55	0.2
AAACAACCCTGAACCAGACGT	23H-RNA	F31C3.11, rrn-2.1, rrn-2.1_element		4.18	3.58	3.65	2.99	2.61	2.81	2.02	1.28	8.36	4.86	9.01		2.81	2.02	1.28	1.97	1.19	1.17		0.14	0.62	0.25	0.25	0.2	0.47	0.37	0.3		0	0.05	0	0	0	0
CCTTCTACTTGGACGGAACAGCC	23H-RNA	Y17D7C.3		1.74	2.55	0	0	0.06	0	0.12	0	0	0	0		0	0.12	0	0	0	0		0	0.18	0	0	0	0.24	0	0.2		0	0.05	0	0	0	0
CCGATGTTTCTGAGATGTCTTC	23H-RNA	F43E2.6		3	3.58	0.51	1.92	1.33	1.05	0.59	0.93	0	0.21	0.15		1.05	0.59	0.93	1.97	0.24	1.72		0.14	0.18	0.38	1.25	1.12	0.35	0.18	0.5		0.35	0	0.13	0.05	0	0.4
TTTTTTCTGTATTCTTATTTTTC	23H-RNA	F52G3.8		2.79	1.98	0	0	0	0	0.06	0	0	0	0		0	0.06	0	0	0	0		0.28	0.27	0.38	0	0.2	0.24	0.09	0.3		0	0.1	0.32	0.1	0	0
CATCCCGATCGTTCGTCGTCGCC	23H-RNA	ChrX_intergenic1		2.09	2.36	0	0	0	0.14	0.3	0.23	0	0.11	0.15		0.14	0.3	0.23	0.28	0.05	0.28		0.69	0.62	0.38	0	0	0.24	0.18	0.3		0	0	0.06	0	0	0
CCTTTCGGAGTGATAGCGATAAC	23H-RNA	Y116A8B.1		3.07	1.85	0	0	0	0.07	0.24	0.17	0	0	0		0.07	0.24	0.17	0	0	0.07		0	0.36	0.5	0	0	0.12	0.18	0.2		0.18	0	0	0	0	0
CTCCTCGGTCTTGACGAAATCC	23H-RNA	C36A4.14		1.19	1.02	0.06	0	0.17	0	0.18	0.06	0	0	0		0	0.18	0.06	0	0.05	0.14		0	0	0.13	0	0	0.35	0	0		0	0	0	0	0	0
ATCTCAGAAACATCGGCAAATG	23H-RNA	F43E2.6		1.05	1.53	1.09	1.35	1.45	1.55	0.83	0.87	0	0	0.15		1.55	0.83	0.87	0.35	0.67	0.62		0.41	0.36	0.76	0.25	0.51	0.59	0.74	0.91		0.53	0.5	0.71	0.9	0.37	0.61
TACAACGTGGAGCTAAGACACC	23H-RNA	F55C9.3		1.12	2.17	0	0.07	0.12	0.07	0.06	0.12	0	0	0		0.07	0.06	0.12	0.07	0	0		0.14	0.09	0	0	0	0.12	0	0		0	0	0.06	0.05	0	0.2
ATGAAGAGGCAGGGTCCGGTTGC	23H-RNA	Y57G11C.1145_hairpin		1.88	1.47	0.58	1.07	0.7	0.84	1.13	0.87	0.35	0.85	0.44		0.84	1.13	0.87	0.78	1	0.97		0.83	1.24	1.39	2.25	2.75	1.3	1.01	1.41		1.41	0.91	0.77	1.05	0.92	0.81
ATCGGACGAGCTCTTATCCCCTC	23H-RNA	T05E12.8		2.02	1.72	0	0	0	0.21	0.18	0.17	0	0.21	0.15		0.21	0.18	0.17	0.07	0.19	0.14		0	0.09	0	0	0	0.12	0.18	0.3		0	0	0	0	0	0
ATGTATGGAGGACGAACACAACC	23H-RNA	C36A4.14		1.74	1.85	0	0	0	0	0.12	0	0	0	0		0	0.12	0	0.07	0.05	0		0	0.09	0	0	0	0	0	0		0	0.05	0	0	0	0
TTGCCGATGTTTCTGAGATGTCT	23H-RNA	F43E2.6		1.25	1.72	1.22	1	1.97	0.42	0.59	0.29	0	0.11	0		0.42	0.59	0.29	2.33	1.29	1.38		0.14	0.27	0.25	0.75	0.51	0.47	0.09	0.3		1.41	0.6	0.45	0.75	1.29	1.62
CATCCCGATCGTTCGTCGTCGC	23H-RNA	ChrX_intergenic1		1.25	1.66	0	0	0	0.14	0.3	0.06	0	0.11	0		0.14	0.3	0.06	0.14	0.1	0.07		0.14	0.36	0	0	0	0	0.28	0.3		0	0	0	0	0	0
AATCGGAAACTCAAAGACCAC	23H-RNA	Y17D7C.3		0.63	1.02	0	0	0.06	0.14	0	0.17	0	0	0		0.14	0	0.17	0	0.05	0		0	0.09	0	0	0	0	0.09	0		0	0	0	0	0	0
TCCTTCGATGTCGGCTCTTCCT	23H-RNA	F31C3.10, F31C3.9, rrn-3.1, rrn-3.56		0.35	5.17	1.92	1.21	1.57	0.07	0.12	0.06	22.63	7.39	22.53		0.07	0.12	0.06	0.07	0	0.07		0.55	2.04	1.26	1.5	2.14	1.18	2.76	1.92		0	0.05	0.19	0.05	0.18	0
CACGATCAGAAGGGATGTCACT	23H-RNA	E01G4.7		1.25	1.28	0	0	0	0.35	0.12	0.12	0	0.11	0		0.35	0.12	0.12	0.07	0.1	0.55		0.14	0.09	0.25	0.25	0	0	0	0.2		0.35	0.05	0.06	0	0	0
TGAAGAGGCAGGGTCCGGTTGC	23H-RNA	Y57G11C.1145_hairpin		1.67	0.64	0	0.14	0.29	0.98	0.47	0.64	0	0	0		0.98	0.47	0.64	0.7	0.86	0.83		0.55	0.27	0.25	0.25	0.81	0.35	0.74	0.4		0.35	0.65	0.45	0.4	0.37	0.4
CGTCGTCGTCATCCACTCCACC	23H-RNA	Y57G11C.1145_hairpin		0.28	1.28	0.38	0	0	0	0	0.17	0	0	0		0	0	0.17	0.21	0.14	0.07		0.28	0	0.25	0.5	0.71	0	0.18	0.3		0.18	0.15	0	0.05	0.18	0.2
TATCTCGATACCATGTCTCACCC	23H-RNA	Y37E11B.2		2.02	0.83	0	0	0.23	0	0	0.12	0	0	0		0	0	0.12	0.07	0	0		0.14	0	0	0.25	0	0	0	0.2		0	0	0	0.05	0	0
TGGAGTGGATGACGACGACGATG	23H-RNA	Y57G11C.1145_hairpin		0.63	0.51	0.13	0.07	0	0.98	0.36	0.23	0.17	0.32	0.15		0.98	0.36	0.23	0.21	0.29	0.55		0.14	0.09	0.5	0.25	0.51	0.24	0.09	0.1		0.53	0.55	0.26	0.8	0.18	1.21
CAATGGAGCGGTGTAAACTTTTC	23H-RNA	E01G4.7		1.53	1.72	0	0	0	0.21	0	0.06	0	0	0		0.21	0	0.06	0	0	0.07		0.14	0	0	0	0	0	0	0		0	0	0.06	0	0	0
TCCTTCGATGTCGGCTCTTCC	23H-RNA	F31C3.10, F31C3.9, rrn-3.1, rrn-3.56		0.56	1.72	2.24	0.21	0.35	0.07	0.36	0.12	10.1	2.54	10.9		0.07	0.36	0.12	0.21	0.1	0.14		0.69	1.15	0.88	0.5	1.12	2.01	1.29	1.21		0	0.15	0.13	0.15	0.18	0
ACGTGTTCCAGCATTCTTCGAC	23H-RNA	Y37E3.30		2.09	2.36	0	0	0	0.14	0.53	0.17	0	0	0		0.14	0.53	0.17	0.42	0.14	0		0.14	0.18	0.13	0	0	0	0.09	0		0.18	0.05	0.26	0	0	0
TGAAGAGGCAGGGTCCGGTTGCG	23H-RNA	Y57G11C.1145_hairpin		0.77	0.32	0.13	0	0.12	0.56	0.24	0.06	0	0	0		0.56	0.24	0.06	0.42	0.29	0.41		0.41	0.09	0.13	0.75	0.51	0.35	0.37	0.1		1.24	0.65	0.77	0.45	0.55	1.42
CGGCTCTTCGAGCGCGTCTTCTT	23H-RNA	ChrIII_hairpin1		1.05	0.7	0.13	0	0	0.21	0.06	0.29	0.17	0.11	0.15		0.21	0.06	0.29	0.28	0.52	0.76		0.14	0.09	0.13	0	0.41	0.24	0	0.1		0	0.1	0	0	0	0.4
AAACAACCCTGAACCAGACGTA	23H-RNA	F31C3.11, rrn-2.1, rrn-2.1_element		3.42	2.81	3.01	2.63	4.24	2.32	3.67	3.02	4.87	5.6	4.65		2.32	3.67	3.02	3.38	2.28	1.79		0.83	0.62	0.63	0.25	0.61	0.59	0.83	0.5		0	0.05	0	0	0	0
TCCTTCGATGTCGGCTCTTCCTAT	23H-RNA	F31C3.10, F31C3.9, rrn-3.1, rrn-3.56		0.42	1.4	1.22	0.64	0.7	0.35	0.06	0	2.96	2.75	4.07		0.35	0.06	0	0.14	0.14	0.48		0.28	0.89	0.13	1.25	2.34	1.42	2.57	1.82		0	0.15	0.13	0.1	0	0.4
ATGGCTGCGGCGAGGATGATGTG	23H-RNA	Y57G11C.1145_hairpin		0.49	0.19	0.19	0	0.12	0.14	0.06	0.06	0.17	0	0		0.14	0.06	0.06	0.35	0.24	0.48		0.14	0	0	0	0.2	0	0	0		0	0.35	0	0.3	0.37	0
TTGCCGATGTTTCTGAGATGTC	23H-RNA	F43E2.6		1.12	0.96	0.96	0.71	0.58	0.42	0.59	0.7	0	0	0.15		0.42	0.59	0.7	1.06	0.71	0.55		0.14	0	0.25	0.25	0.41	0.24	0.37	0.1		0	0.25	0.26	0.35	0	0.2
ATTTGCCGATGTTTCTGAGATG	23H-RNA	F43E2.6		0.49	1.47	0.96	2.07	2.15	0.28	0.65	0.46	0.35	0.11	0.15		0.28	0.65	0.46	0.49	0.33	0.41		0.41	0.44	0.5	0.75	0.92	0.95	1.1	0.71		1.41	1.06	1.03	1.75	0.74	0.61
GCCGATGTTTCTGAGATGTCTTC	23H-RNA	F43E2.6		0.21	0.64	0	0.07	0.12	0.21	0.12	0.12	0	0	0		0.21	0.12	0.12	0.56	0.24	0.48		0.14	0	0	0	0.2	0	0	0		0	0	0.13	0	0	0
AATCGGAAACTCAAAGACCACAC	23H-RNA	Y17D7C.3		0.7	0.83	0	0	0	0	0	0.06	0	0	0		0	0	0.06	0.07	0	0		0	0	0	0	0	0.24	0	0		0	0	0	0	0	0
TATTCCTGATGCGGCGCCGGCT	23H-RNA	T05E12.8		0.42	0.83	0	0	0	0.07	0.24	0	0	0.11	0		0.07	0.24	0	0	0	0		0.14	0.36	0	0	0	0	0	0.1		0.18	0	0.06	0.1	0.18	0
AAGACATCTCAGAAACATCGGCA	23H-RNA	F43E2.6		0.98	1.09	0.13	0.28	0.58	0.14	0	0.17	0	0.11	0.15		0.14	0	0.17	0.35	0.38	0.34		0	0.18	0	0.25	0	0.12	0.09	0.1		0.35	0.1	0.06	0.2	0.55	0
AGTCAGTTGGATGGGAAAATG	23H-RNA	W04B5.8		1.39	1.4	0	0	0	0	0.12	0	0	0	0		0	0.12	0	0	0	0		0	0	0	0	0	0	0	0		0	0.05	0	0	0	0.2
CGATGGCTGCGGCGAGGATGATG	23H-RNA	Y57G11C.1145_hairpin		0.14	0.38	0.06	0.14	0	0.35	0.06	0.17	0	0	0.15		0.35	0.06	0.17	0.99	0.62	0.83		0	0	0.13	1	0.2	0.24	0.09	0.1		0	0.25	0.19	0.05	0	0.4
CGGTGTGCTCGAGGGCTTGTCA	23H-RNA	Y37E3.30		0.63	0.57	0	0	0	0.07	0.3	0.06	0	0.11	0		0.07	0.3	0.06	0.07	0.05	0		0	0.09	0.13	0	0	0.24	0.09	0.2		0	0.05	0.06	0	0	0
TATCGCACTCTTTGCCCTTCCG	23H-RNA	jmjc-1, T28F2.4		0.98	1.47	0.06	0.07	0.12	0.07	0	0	0	0.11	0		0.07	0	0	0.07	0	0		0	0	0	0	0.1	0.24	0	0.1		0	0	0	0	0.18	0
TCGAGAAATGACGAGAAATTCAC	23H-RNA	Unknown_RE4		2.07	2.19	0.48	1.32	0.92	0.59	0.77	0.54	0	0	0		0.59	0.77	0.54	0.39	0.8	0.32		0.13	0.33	0.82	2.79	2.74	1.21	0.6	0.84		0.33	0.75	0.95	0.79	0.51	0
TGACATCCCTTCTGATCGTGGA	23H-RNA	E01G4.7		1.39	1.28	0	0	0	0.07	0.12	0.12	0	0	0		0.07	0.12	0.12	0	0.1	0.14		0.14	0	0	0	0	0	0	0.1		0	0	0	0	0	0
TTCTGAGATGTCTTCACAATTCT	23H-RNA	F43E2.6		1.32	1.28	0.13	0.28	0.35	0.7	0.53	0.81	0	0	0		0.7	0.53	0.81	0.49	1.29	0.97		0.69	0.44	0.5	0.5	0.41	0.35	0.55	0.4		0.35	0.25	0.26	0.4	0.55	0.2
ACATCTCAGAAACATCGGCAAA	23H-RNA	F43E2.6		0.84	0.7	1.09	1.21	0.41	0.28	0.24	0.23	0	0.11	0		0.28	0.24	0.23	0	0.29	0		0	0	0.25	0	0.31	0.12	0.09	0.1		0	0.3	0.06	0.3	0.37	0.2
GCCGATGTTTCTGAGATGTCTT	23H-RNA	F43E2.6		1.53	0.89	3.01	1.99	2.67	1.69	1.6	2.09	1.04	0.53	0.87		1.69	1.6	2.09	1.2	1.05	0.9		0.28	0.44	0.25	0	0	0.95	0.64	1.01		1.24	1.21	0.83	1.05	2.03	0.61
TTCTGAGATGTCTTCACAATTC	23H-RNA	F43E2.6		0.98	0.57	0.06	0.07	0.41	0.21	0.18	0.29	0	0	0		0.21	0.18	0.29	0.28	0.43	0.41		0.14	0.09	0.13	0	0.1	0	0	0.2		0.18	0.05	0.13	0.05	0	0.2
ACCAATTGTACTTTGTAGGAGCC	23H-RNA	Y116A8B.1		0.35	0.96	0	0	0	0	0	0	0	0	0		0	0	0	0	0.05	0		0	0	0.13	0	0	0	0	0		0	0	0	0	0	0
TAATTCTGCAGCCACTTCCGAA	23H-RNA	W03D2.15		0.77	0.96	0	0	0	0.07	0	0	0	0	0		0.07	0	0	0.14	0	0		0	0.09	0	0	0	0	0	0		0	0	0.06	0	0	0
TCAACAGACTGATGGACGATG	23H-RNA	C36A4.14		0.63	0.51	0	0.14	0.29	0.14	0.47	0.12	0	0	0		0.14	0.47	0.12	0	0.05	0.07		0.28	0.36	0.25	0	0	0.24	0.09	0.2		0	0	0	0	0	0
TTACGAAGTGGGATTGGAAAATC	23H-RNA	F52G3.8		1.05	1.6	0	0	0	0	0.18	0.12	0	0	0		0	0.18	0.12	0	0	0.07		0	0.09	0	0	0	0.12	0.09	0.1		0	0	0.06	0	0	0
TTCGAGACTCGTCAGATCTGCA	23H-RNA	K02E2.6		1.12	0.83	0	0.14	0.17	0.07	0.06	0.17	0	0	0		0.07	0.06	0.17	0	0	0		0	0.09	0	0	0	0	0.09	0		0.18	0	0	0	0	0
TTGTGAAGACATCTCAGAAAC	23H-RNA	F43E2.6		0.56	0.51	0.26	0.36	0.23	0.35	0.12	0.41	0	0	0		0.35	0.12	0.41	0.28	0.38	0.28		0.28	0.18	0.13	0.25	0.61	0.59	0.37	0.4		0.18	0.05	0.19	0.15	0.18	0.2
AGACATCTCAGAAACATCGGC	23H-RNA	F43E2.6		0.21	0.89	0.06	0.5	0.17	0.14	0.06	0	0	0.11	0.15		0.14	0.06	0	0.14	0.29	0.34		0	0	0	0	0	0.35	0.09	0		0.18	0.05	0	0.1	0.18	0
ATCCCAGAACTGGAAATCTTCAC	23H-RNA	other		0.7	0.83	0.06	0.14	0.23	0	0.06	0	0	0	0		0	0.06	0	0	0	0.07		0	0	0	0	0.1	0	0	0		0	0	0.06	0	0	0
ATCGTCGTCGTCATCCACTCCA	23H-RNA	Y57G11C.1145_hairpin		0.35	0.57	0.19	0.07	0	0	0.18	0.23	0	0.21	0		0	0.18	0.23	0.14	0.1	0.34		0.41	0.27	0.13	0.25	0.61	0.24	0.18	0		0.53	0.1	0.39	0.1	0.37	0
CTTTTTTCACCAAGAACGAAACC	23H-RNA	E01G4.7		1.05	0.89	0	0	0	0.07	0	0.12	0	0	0		0.07	0	0.12	0.07	0.1	0.14		0	0	0	0	0	0.12	0	0		0	0	0	0	0.18	0
AACTTCTTCCACGCCATCATCCA	23H-RNA	Y57G11C.1145_hairpin		0.49	0	0	0	0	0	0	0.06	0	0	0		0	0	0.06	0	0.1	0		0	0.09	0.13	0.25	0.2	0	0.09	0.1		0.18	0.3	0.32	0.3	0.74	0.4
AAGACATCTCAGAAACATCGGC	23H-RNA	F43E2.6		0.42	0.57	0.38	0.21	0.12	0	0.06	0	0	0	0		0	0.06	0	0.14	0.1	0.14		0	0	0	0	0	0	0.09	0		0.18	0.3	0.06	0.15	0	0.2
CAGCGTCGTACGATGAAAGATG	23H-RNA	F52G3.8		0.14	0.51	0	0	0	0.21	0	0	0	0	0		0.21	0	0	0	0	0.07		0.14	0	0	0	0	0.24	0.09	0		0	0.05	0	0	0	0
CCCCATTGCCGAATGTTTGAATC	23H-RNA	Y37E3.30		0.42	0.64	0	0	0	0	0	0	0	0	0		0	0	0	0	0	0.07		0	0.09	0.13	0	0	0	0	0		0.18	0	0	0	0.18	0
CCCTACTCTTCGCATCTCATC	23H-RNA	Y67D8A.2		0.28	0.06	0.26	0	0.06	0	0.06	0	0	0	0		0	0.06	0	0	0.05	0.07		0	0	0.25	0	0	0	0	0		0	0	0	0	0	0
TAAACATAGCGGCGCGCGGAACC	23H-RNA	PALTA3		0.13	0.18	0	0.14	0.22	0.2	0	0	0	0	0		0.2	0	0	0.07	0.05	0.07		0	0.09	0	0.24	0.2	0.23	0.53	0.1		0	0.05	0.12	0.14	0.18	0
ATCTCAGAAACATCGGCAAAT	23H-RNA	F43E2.6		0.98	1.34	0.32	0.57	0	0	0.06	0.06	0	0	0		0	0.06	0.06	0.21	0.19	0.07		0	0.62	0	0.5	0.51	0	0.18	0.2		0.53	0.35	0.32	0.25	1.29	0.4
CATCTCAGAAACATCGGCAAA	23H-RNA	F43E2.6		0.63	0.77	0.13	0.78	0.41	0.28	0.18	0.06	0	0	0		0.28	0.18	0.06	0.21	0.95	0.41		0	0.18	0	0.25	0.2	0.24	0.46	0.3		0.88	0.2	0.19	0.2	0.18	0.4
TGAAGACATCTCAGAAACATCGG	23H-RNA	F43E2.6		1.25	0.77	0.13	0.36	0.12	0.07	0.06	0.06	0	0	0		0.07	0.06	0.06	0.07	0.24	0.55		0.14	0.18	0.25	0.25	0.2	0.24	0.09	0.2		0	0.05	0.06	0.1	0.37	0
TTGCCAAATGGACGTACAGATC	23H-RNA	Y105C5A.14		0.63	0.38	0	0	0	0	0	0	0	0	0		0	0	0	0	0.05	0		0	0	0	0	0	0	0	0.1		0	0	0	0	0	0
AACTTCTTCCACGCCATCATCC	23H-RNA	Y57G11C.1145_hairpin		0.49	0.26	0	0	0	0.07	0	0.06	0	0	0		0.07	0	0.06	0	0.05	0		0	0.09	0	0.25	0.1	0	0	0.1		0	0.05	0.06	0.05	0	0
AATCGGGATGGATCGATGGATT	23H-RNA	T05E12.10		0.56	0.45	0	0	0	0.14	0	0.06	0	0	0		0.14	0	0.06	0.21	0.05	0.21		0	0.18	0.13	0	0.2	0	0.18	0.1		0	0	0.13	0.15	0.74	0
AGCAGAAACTATATGGAACAT	23H-RNA	F39E9.29_region		0.21	0.38	0	0	0	0	0	0	0	0	0		0	0	0	0	0	0.07		0.14	0	0	0	0.1	0	0	0		0	0.1	0	0.15	0	0
ATTCGGGAATTAGTTGTCGACA	23H-RNA	T05E12.8		2.72	1.66	0	0	0	0.42	0.36	0.29	0.35	0.21	0		0.42	0.36	0.29	0.14	0.24	0.21		0.97	0.8	0.5	0	0	0.71	0.55	0.3		0	0.15	0.13	0.15	0.37	0
CCATCAGCACCAACACCTCACCC	23H-RNA	C36A4.14		0.35	0.19	0	0	0	0	0	0	0	0	0		0	0	0	0	0	0		0	0	0	0	0	0	0	0		0	0	0	0	0	0
CCGATGTTTCTGAGATGTCTTCA	23H-RNA	F43E2.6		1.67	1.21	0.06	0	0.06	0.07	0.18	0.06	0	0	0		0.07	0.18	0.06	0.63	0.38	0.97		0.28	0	0.5	0.25	0.51	0.12	0	0.1		0	0.05	0.06	0	0	0
CTAATCGTCCCGATCCTTTCATC	23H-RNA	ChrX_intergenic1		0.84	0.32	0	0	0	0	0.12	0	0	0	0		0	0.12	0	0	0.05	0		0	0.09	0.13	0	0	0	0	0		0	0.05	0	0	0	0
CTGATCTCTCTTCTCGGCTCTT	23H-RNA	ChrIII_hairpin1		0.49	0.83	0.19	0.07	0	0.07	0	0.06	0	0	0		0.07	0	0.06	0	0.05	0		0	0	0	0	0	0	0.09	0		0	0	0	0.1	0	0
GACGACGAACGATCGGGATGGA	23H-RNA	ChrX_intergenic1		0.91	0.96	0	0	0	0.28	0.18	0.06	0	0	0		0.28	0.18	0.06	0.14	0.14	0.14		0.14	0.36	0.25	0	0.1	0	0.18	0		0.35	0.15	0.06	0	0	0
TTTCTGAGATGTCTTCACAATTC	23H-RNA	F43E2.6		1.25	0.51	0.06	0	0.29	0.63	0.53	0.29	0	0.11	0.15		0.63	0.53	0.29	0.49	0.43	0.69		0	0.09	0	0.25	0.51	0.24	0.18	0.5		0	0.05	0.06	0.05	0	0
TTTTTGCTGATCTCTCTTCTCGG	23H-RNA	ChrIII_hairpin1		0.49	0.13	0	0	0	0	0	0.06	0	0	0		0	0	0.06	0	0.1	0.07		0	0.09	0.13	0.25	0	0.12	0.18	0		0	0	0	0	0	0
ATCGTCGTCGTCATCCACTCC	23H-RNA	Y57G11C.1145_hairpin		0.7	0.45	0	0.14	0	0.14	0.06	0.12	0	0	0.29		0.14	0.06	0.12	0.07	0.19	0.07		0.28	0.18	0.13	0.5	0.41	0.12	0.28	0		0	0.05	0	0	0	0
CGATGTTTCTGAGATGTCTTC	23H-RNA	F43E2.6		0.56	0.19	0.38	0	0.46	0.21	0.06	0.17	0	0	0		0.21	0.06	0.17	0.7	0.43	0.83		0.28	0	0.13	0	0.1	0.12	0	0		0	0	0	0	0	0
CTTCTATCATTCTCGAATTCCC	23H-RNA	other		0.28	0.38	0	0	0	0.07	0	0	0	0	0		0.07	0	0	0	0	0.07		0	0	0	0	0	0	0	0		0	0	0	0	0	0
TGCTTTCCTCATCTCTGATCTTT	23H-RNA	F55A4.9, rncs-1		1.6	0.77	2.05	1.28	1.8	0.91	0.41	0.41	0	0	0		0.91	0.41	0.41	0.7	1.43	0.97		0.28	0	0.25	1.5	1.32	0.35	0	0.1		0	0	0.19	0.15	0	0
TTATCATTGCCCGTCGCCTTTA	23H-RNA	C02B8.2, F31A9.4, fbxc-37, fbxc-38		0.49	0.32	0	0.14	0.12	0	0	0.06	0	0	0		0	0	0.06	0	0	0		0	0	0.13	0	0	0	0	0.1		0	0	0	0	0	0
ACGGAGTTAAATTTGAATTTTT	23H-RNA	Y69A2AR.16_hairpin		0.14	0.51	0.13	0	0.06	0.21	0.06	0.12	0	0	0		0.21	0.06	0.12	0.07	0.05	0		0	0	0.13	1.25	1.43	0.12	0.09	0		0	0.1	0	0	0.18	0.61
AGCCAATATCGGACGATGAAGCC	23H-RNA	other		0.21	0.57	0	0	0.06	0	0	0	0	0	0		0	0	0	0	0	0		0	0	0	0	0	0	0	0		0	0	0	0	0	0
ATCTCAGAAACATCGGCAAATGG	23H-RNA	F43E2.6		0.49	0.89	0.38	0.07	0.17	0.28	0.12	0.12	0	0.11	0		0.28	0.12	0.12	0.42	0.43	0.14		0.41	0	0	0	0.51	0.95	0.37	0.1		0.18	0.05	0.06	0.1	0.18	0.2
CATCGTCGTCGTCATCCACTCC	23H-RNA	Y57G11C.1145_hairpin		0.42	0.32	0	0	0	0.07	0	0	0	0	0		0.07	0	0	0.21	0	0.07		0	0.18	0	0.25	0.41	0.24	0.18	0.1		0	0.1	0	0	0	0
GAAGACATCTCAGAAACATCGGC	23H-RNA	F43E2.6		1.19	1.53	0.13	0.43	0	0.21	0.12	0.23	0.17	0.11	0.15		0.21	0.12	0.23	0.35	0.38	0.48		0	0.27	0.38	0	0	0	0.28	0.3		0.53	0.45	0.64	0.45	0.55	0
TATTCCTGATGCGGCGCCGGCTC	23H-RNA	T05E12.8		0.49	0.38	0	0	0	0	0	0	0	0	0		0	0	0	0	0	0		0.28	0	0	0	0	0	0	0		0	0	0	0	0	0
TCTGAGATGTCTTCACAATTCT	23H-RNA	F43E2.6		0.7	0.45	0.83	0.57	0.35	0.28	0.41	0.52	0	0	0		0.28	0.41	0.52	0.42	0.29	0.28		0	0.18	0.13	0.25	0.51	0.24	0.18	0.3		0	0.1	0.32	0.15	0.18	0.4
TTCTACATATCCAACGGAGGAAC	23H-RNA	Y17D7C.3		0.35	0.57	0	0	0	0.07	0	0	0	0	0		0.07	0	0	0	0	0		0	0.18	0	0	0	0	0	0		0	0	0	0	0	0
AGTGGAGTGGATGACGACGAC	23H-RNA	Y57G11C.1145_hairpin, Y57G11C.51		0.49	0.38	0.06	0.21	0	0.49	0.41	0.17	0	0.11	0.29		0.49	0.41	0.17	0.42	1.14	0.83		0	0.18	0.13	0.75	0.71	0.35	0.09	0.61		0.71	0.4	0.45	0.7	0.18	0.81
ATGAAGAGGCAGGGTCCGGTTG	23H-RNA	Y57G11C.1145_hairpin		0.28	0.19	0.13	0	0.29	0.07	0	0.23	0	0	0		0.07	0	0.23	0.14	0.05	0.21		0	0	0.13	0.5	0	0.12	0	0		0	0.05	0	0.1	0	0
CGACGATGGCTGCGGCGAGGATG	23H-RNA	Y57G11C.1145_hairpin		0.21	0.26	0	0	0	0	0.18	0.17	0	0	0		0	0.18	0.17	0.07	0.14	0		0	0	0	0	0.1	0.12	0.09	0		0	0	0	0.05	0	0
CTCCATACGGTCATTTGAGTCTC	23H-RNA	F34D6.11, linc-12		0.7	0.51	0	0	0	0	0.24	0	0	0	0		0	0.24	0	0.07	0	0.07		0	0.09	0	0	0	0	0.09	0		0	0	0	0	0	0
TCATCAGCTCCATCAACACCACC	23H-RNA	C36A4.14		0.77	0.19	0	0	0	0	0	0	0	0	0		0	0	0	0	0	0		0	0	0	0	0	0	0	0		0	0	0	0	0	0
TTTTTTGGCACCGCTGTTCTGC	23H-RNA	F55A4.9, rncs-1		0.49	1.85	1.02	0.78	0.52	0.14	0.24	0.12	0.17	0	0		0.14	0.24	0.12	0.49	0.14	0.28		0	0.09	0.13	0.25	1.02	0.12	0	0.2		0	0	0.32	0.05	0.37	0.2
AAATTGTCGGCCGCCGTGAAAAC	23H-RNA	other		0.38	0.15	0	0	0	0	0	0	0	0	0		0	0	0	0	0	0		0	0.07	0.1	0	0	0	0	0		0	0	0	0	0.14	0
AAACAACCCTGAACCAGACGTAC	23H-RNA	F31C3.11, rrn-2.1		1.05	0.89	0.9	0.93	1.16	0.49	0.56	0.52	1.04	1.21	1.31		0.49	0.56	0.52	0.35	0.55	0.38		0.21	0.22	0.06	0.13	0.05	0.06	0.09	0.15		0	0	0	0	0	0
ACATCTCAGAAACATCGGCAA	23H-RNA	F43E2.6		0.63	0.38	0.32	0.57	0.64	0.07	0.18	0.12	0	0.11	0		0.07	0.18	0.12	0	0	0		0	0	0.13	0	0.2	0.24	0	0		0	0.05	0.19	0.15	0	0
AGACATCTCAGAAACATCGGCAA	23H-RNA	F43E2.6		0.35	0.32	0.13	0.57	0.23	0.14	0.06	0.12	0	0	0		0.14	0.06	0.12	0.07	0.33	0		0	0	0.13	0	0	0.12	0	0.1		0	0	0	0.3	0.18	0
AGACGCGCGCACTCCCAACTCG	23H-RNA	TC5A		0.49	0.89	0.51	1.07	2.15	1.27	1.3	0.64	3.31	2.54	4.07		1.27	1.3	0.64	1.55	1.48	1.59		1.66	1.07	0.63	1	0.41	1.89	0.37	0.71		0.18	0.4	0.96	0.5	0.55	0.61
AGTAATATACCGCTACACCAACC	23H-RNA	ChrII_intergenic1		0.28	0.26	0	0	0	0	0	0	0	0	0		0	0	0	0	0	0		0	0.18	0	0	0	0	0	0.1		0	0	0	0.05	0	0
ATCCCCCCTCCTGTGGAAGTAGA	23H-RNA	C36A4.14		3.76	2.94	1.09	0.93	1.22	0.63	0.65	0.64	0	0.32	0		0.63	0.65	0.64	0.49	0.76	0.83		0.83	0.53	0	0.25	0	0.35	0.37	0.3		0.18	0.2	0.32	0.15	0.18	0
ATCGGTGTGCTCGAGGGCTTGT	23H-RNA	Y37E3.30		0.07	0.19	0	0	0	0	0.06	0	0	0	0		0	0.06	0	0	0.1	0		0	0	0	0	0	0	0	0		0	0	0	0	0	0
CGCGCGCCGCTATGTTTAACT	23H-RNA	PALTA3		0.21	0.19	0.38	0.36	0.41	0	0.06	0	0	0	0		0	0.06	0	0	0	0		0	0.18	0.25	0.25	0.1	0.47	0.37	0.3		0	0.3	0.26	0.15	0.74	0.2
GAGTGGATGACGACGACGATGGC	23H-RNA	Y57G11C.1145_hairpin		0.07	0.06	0	0.36	0	0.14	0.24	0.06	0.35	0.21	0.29		0.14	0.24	0.06	0.14	0.05	0.14		0	0	0	0.5	0	0	0.18	0		0.18	0.05	0.06	0.5	0	0.4
TCATGCGTCTCGGTGGTCCGAA	23H-RNA	Y37E3.30		0.42	0.7	0.19	0	0	0	0.06	0	0	0	0		0	0.06	0	0	0	0		0.14	0.09	0.13	0	0	0	0	0		0	0	0	0	0	0
TCCATTGTATTTTCTCAGGACC	23H-RNA	F39E9.28		0.42	0.51	0.13	0.07	0	0.07	0	0	0	0	0		0.07	0	0	0	0.05	0		0	0	0	0.25	0	0	0.09	0		0	0	0	0	0	0.2
TGGAAACGTCAAGAAGTTTGATC	23H-RNA	F52G3.8		0.28	0.26	0	0	0	0.14	0.06	0	0	0	0		0.14	0.06	0	0	0.14	0.07		0	0	0	0	0.1	0.12	0	0		0	0	0.06	0	0	0
AACAACCCTGAACCAGACGTAC	23H-RNA	F31C3.11, rrn-2.1, rrn-2.1_element		1.05	0.96	0.51	1.92	0.81	0.49	0.53	0.35	0.7	0.95	2.33		0.49	0.53	0.35	0.07	0.29	0.34		0.41	0	0	0	0.2	0.12	0.09	0		0.18	0	0	0	0	0
ATTCCACTTGCATCATACGACG	23H-RNA	F52D2.6		0.42	0.06	0	0	0	0	0	0.12	0	0	0		0	0	0.12	0.07	0	0		0	0.09	0.25	0	0	0.12	0	0		0	0	0	0	0	0
ATTGTGAAGACATCTCAGAAA	23H-RNA	F43E2.6		0.35	0.13	0.26	0.36	0	0.07	0.3	0.12	0	0	0		0.07	0.3	0.12	0	0.05	0.41		0	0	0.13	0.25	0.41	0.12	0.28	0.2		0	0.05	0	0.15	0	0
CAGACATGATCTGGAGATGTTT	23H-RNA	Y116A8B.1		0.07	0.19	0	0	0	0	0.06	0.06	0	0	0		0	0.06	0.06	0	0	0		0	0	0	0	0	0	0.09	0		0	0	0.06	0	0	0
CCGTCTAGGTGATCTTTCAACA	23H-RNA	Y37E3.30		0.42	0.45	0	0	0	0	0.06	0.12	0	0	0		0	0.06	0.12	0	0.05	0		0	0	0	0	0	0	0	0		0	0	0	0	0	0
CCGTGATGGGACAGCCTGACACC	23H-RNA	CELE14B		0.56	0.51	0	0	0	0.14	0	0	0	0	0		0.14	0	0	0	0	0		0.14	0	0	0.5	0.2	0	0	0		0	0	0.06	0.05	0	0
CTCTTACTGTAGTTTTCGCTAAG	23H-RNA	PALTA4		0.35	0.32	0.96	0.21	0.46	0	0.18	0.12	0	0	0		0	0.18	0.12	0.07	0.14	0.28		0	0.53	0	0	0.61	0.12	0.64	0.1		0.18	0.05	0.13	0.1	0	0
GACAGTCCCCACTCTTCTCGA	23H-RNA	F31C3.7, F31C3.8, rrn-1.1, rrn-1.2		1.74	0.7	4.23	4.84	6.03	1.9	2.25	2.15	2.61	1.69	5.67		1.9	2.25	2.15	3.88	3	3.1		0.41	0.18	0.25	0	0.2	1.06	1.1	0.81		0	0	0	0	0	0
GTGGAGCCTGCACTGTTGATTTC	23H-RNA	T05E12.8		0.42	0.38	0	0	0	0	0.06	0	0	0	0		0	0.06	0	0	0	0.14		0	0	0	0	0	0	0	0.1		0	0	0	0	0	0
TACGTTTACATGGAGGTCCCGCC	23H-RNA	F39E9.29_region, F39E9.7		0.56	0.06	0	0	0	0	0	0	0	0	0		0	0	0	0	0	0		0	0	0	0	0	0	0	0		0	0	0	0	0	0
TCGTCGTCGTCATCCACTCCAC	23H-RNA	Y57G11C.1145_hairpin		0.35	0.13	0	0.28	0	0	0.06	0.06	0	0	0		0	0.06	0.06	0.07	0	0		0	0.36	0.25	0	0.31	0.12	0.09	0		0	0	0	0.05	0	0
TCGTCGTCGTCATCCACTCCACC	23H-RNA	Y57G11C.1145_hairpin		0.14	0.13	0	0	0	0.07	0.06	0	0	0.11	0.15		0.07	0.06	0	0.14	0.19	0.34		0	0.09	0	0.25	0.1	0	0	0.2		0.35	0.05	0	0.05	0	0
TCGTCGTCGTCATCCACTCCACT	23H-RNA	Y57G11C.1145_hairpin		0.21	0.19	0	0	0	0	0.06	0	0	0.11	0.15		0	0.06	0	0.14	0.05	0.07		0	0	0	0	0.1	0	0	0		0	0.15	0.19	0	0	0
TCTACAGAGTCTGGAGAATGT	23H-RNA	C36A4.11, K06B9.6		0.28	0.26	0	0	0	0.14	0	0.06	0	0	0		0.14	0	0.06	0.07	0.05	0.07		0	0	0	0	0.2	0.12	0	0		0.35	0	0	0.4	0	0.2
TCTGAGATGTCTTCACAATTC	23H-RNA	F43E2.6		0.42	0.06	0.06	0.14	0.17	0	0	0	0	0	0		0	0	0	0	0	0		0	0	0	0	0.1	0	0	0		0	0	0	0.05	0	0
TCTTAGAACCCATATATACCCCC	23H-RNA	Y116F11A.1		0.77	0.26	0	0	0	0	0	0	0	0	0		0	0	0	0	0	0		0	0.18	0	0	0	0	0.09	0.1		0	0	0	0	0	0
TGCCGATGTTTCTGAGATGTCTTC	23H-RNA	F43E2.6		0.63	0.45	0.9	0.21	0.23	0	0.36	0	0	0	0		0	0.36	0	0	0.24	0.41		0	0.09	0.25	0.25	0.2	0.12	0.18	0.2		0.35	0.05	0.06	0	0	0.2
TGGATGATGGCGTGGAAGAAGT	23H-RNA	Y57G11C.1145_hairpin		0.14	0.06	0	0	0	0.07	0.06	0	0	0	0		0.07	0.06	0	0.07	0	0.07		0	0	0.13	0	0.1	0	0	0		0	0	0	0.1	0	0
TTCGTTCTTGGTGAAAAAAGTG	23H-RNA	E01G4.7		0.63	0.83	0	0.21	0	0.14	0.06	0.23	0	0	0		0.14	0.06	0.23	0	0	0		0.14	0.18	0	0	0	0	0.09	0.1		0	0	0	0.05	0	0
AGACATCTCAGAAACATCGGCA	23H-RNA	F43E2.6		0.28	0.51	0.32	0.93	0.41	0.35	0.12	0.12	0	0	0		0.35	0.12	0.12	0.21	0.29	0.21		0	0	0	0	0	0	0.09	0.2		0.18	0.05	0.26	0.3	0.37	0.2
CGGGATGATGGATCGGGATGA	23H-RNA	T05E12.10		0.14	0.38	0	0	0	0	0.12	0.06	0	0	0		0	0.12	0.06	0.28	0.05	0.07		0.14	0	0.25	0	0	0	0	0		0	0.05	0	0	0	0
GGATTTCGTCAAGACCGAGGAGCT	23H-RNA	C36A4.14		0.42	0.38	0	0	0	0	0	0	0	0	0		0	0	0	0	0	0		0.14	0.09	0	0	0	0	0	0		0	0	0.06	0	0	0
TAGTTTTGATGACTGGATCTACC	23H-RNA	Y116F11A.1		0.52	0.48	0	0	0	0	0	0	0	0	0		0	0	0	0	0	0		0	0	0	0	0	0	0	0		0	0	0	0	0	0
TGAAGACATCTCAGAAACATC	23H-RNA	F43E2.6		0.63	0.32	0.45	0.14	0.12	0.14	0.12	0.12	0	0	0		0.14	0.12	0.12	0	0	0.07		0	0.09	0	0	0.31	0.12	0.28	0.2		0	0	0	0.05	0	0
TGTTCCCTGTGGAGACCCTCACC	23H-RNA	other, Y116A8B.1		0.42	0.45	0	0	0	0	0	0	0	0	0		0	0	0	0	0.05	0		0.14	0.09	0	0	0	0	0	0		0	0	0	0	0	0
TTAAACATAGCGGCGCGCGGAAC	23H-RNA	PALTA3		0.21	0	0.06	0.07	0.17	0	0.06	0	0.17	0	0		0	0.06	0	0.14	0.05	0.07		0	0.09	0	0	0.1	0.12	0	0.1		0	0.1	0.06	0.15	0.18	0.2
TTTGGCCAAGCGGACTGGAGCAC	23H-RNA	F55A4.9, rncs-1		0.49	0.45	0.19	0.07	0	0	0	0.12	0	0	0		0	0	0.12	0.28	0.19	0.14		0	0	0	0.5	0.31	0	0.18	0		0	0	0	0	0	0
TTTTTGATTCAAAAACTCGGAT	23H-RNA	mdt-8, Y62F5A.1		0.42	0.51	0	0	0	0	0	0.06	0	0	0		0	0	0.06	0.07	0	0		0	0	0	0	0	0	0	0		0	0	0	0	0	0
CCCCGTGAGGACCGTGTACGCCC	23H-RNA	Y116A8B.1		0.21	0.06	0	0	0	0.11	0.06	0.03	0	0	0.07		0.11	0.06	0.03	0.07	0	0		0.07	0	0	0	0	0.06	0	0.05		0	0	0	0	0	0
TCTCTTCAGCTGACTACACTCT	23H-RNA	rft-2, Y47D7A.14_IR, Y47D7A.14_IR_element		0.22	0.05	0	0	0.05	0	0.19	0	0	0	0		0	0.19	0	0	0	0		0.11	0	0	0	0.08	0.09	0.07	0		0	0.08	0	0.08	0.15	0.16
AAGAAGAAGCATCACGTCGTTT	23H-RNA	Y17D7C.3		0.07	0.26	0	0	0	0	0	0	0	0	0		0	0	0	0.07	0	0		0	0	0	0	0	0	0	0		0	0	0	0.05	0	0
ACAACCCTGAACCAGACGTACC	23H-RNA	F31C3.11, rrn-2.1, rrn-2.1_element		0.42	0.13	0.19	0.28	0.23	0.14	0.41	0.23	0	0.21	0.15		0.14	0.41	0.23	0.07	0.05	0		0	0.09	0	0	0	0	0.09	0		0	0	0	0	0	0
ATGACGACGACGATGGCTGCGGC	23H-RNA	Y57G11C.1145_hairpin		0.49	0.38	0.26	0	0.06	0.07	0.24	0.23	0	0	0		0.07	0.24	0.23	0.07	0.1	0		0	0.09	0	0.75	0.1	0.12	0.28	0.3		0.18	0.2	0.06	0.25	0	0
ATGTATGGAGGACGAACACAAC	23H-RNA	C36A4.14		0.56	0.51	0	0	0.06	0	0	0.06	0	0	0		0	0	0.06	0	0	0		0.14	0.09	0	0	0	0.12	0	0.1		0	0	0	0	0	0
ATTCCACTTGGGGTAAATTCGCC	23H-RNA	C36A4.14		0.14	0.13	0	0	0	0	0	0	0	0	0		0	0	0	0	0.05	0		0	0	0	0	0	0	0	0		0	0	0	0	0	0
CAACGTCTCGGCTAGCCACCTA	23H-RNA	T05E12.8		0.28	0.45	0	0	0	0.07	0.18	0.06	0	0	0		0.07	0.18	0.06	0	0.05	0.07		0	0	0	0	0	0.24	0.09	0		0	0	0	0	0	0
CATTCCTACGACATGGAGGTCCC	23H-RNA	C40A11.10, mir-8199		0.28	0.32	0	0	0	0	0	0	0	0	0		0	0	0	0	0	0		0	0	0	0	0	0	0	0		0	0	0	0	0	0
CCGCCCACAGTTCTGTACCTTGC	23H-RNA	Y24F12A.3, Y24F12A.4		0	0.06	0	0	0	0	0	0	0	0	0		0	0	0	0	0	0		0	0	0	0	0	0	0	0		0	0	0	0	0	0
CGGATAGTGTGATCTTAGAACCC	23H-RNA	Y116F11A.1		0.07	0.32	0	0	0	0	0	0.06	0	0	0		0	0	0.06	0	0	0		0	0	0	0	0	0	0	0		0	0	0	0	0	0
CGTCGTCGTCATCCACTCCACT	23H-RNA	Y57G11C.1145_hairpin		0.07	0.16	0	0	0	0	0	0.06	0	0.11	0.22		0	0	0.06	0.04	0	0		0	0	0	0.13	0.15	0.18	0.05	0		0	0.08	0.1	0.13	0	0.2
CTCCTCGGTCTTGACGAAATCCCA	23H-RNA	C36A4.14		0.28	0.19	0	0	0	0	0	0	0	0	0		0	0	0	0	0	0		0	0	0	0	0	0	0	0		0	0	0	0	0	0
GTGGAGTGGATGACGACGACG	23H-RNA	Y57G11C.1145_hairpin, Y57G11C.51		0.7	0.89	0.19	1	0.52	2.32	2.19	1.74	3.31	3.7	1.16		2.32	2.19	1.74	0.14	0.1	0.14		1.1	0.89	1.51	0	0.2	2.36	1.93	1.11		1.95	1.91	2.95	2.26	2.4	1.82
TCTGTACGTCCATTTGGCAATA	23H-RNA	Y105C5A.14		0.35	0.51	0	0	0	0	0	0	0	0	0		0	0	0	0	0	0		0	0	0	0	0	0	0	0.1		0	0	0	0	0	0
TGCCGATGTTTCTGAGATGTC	23H-RNA	F43E2.6		0.21	0.51	0.45	0.21	0.35	0.14	0.36	0.58	0	0.11	0		0.14	0.36	0.58	0	0.24	0.14		0	0	0	0	0	0.24	0	0		0	0.2	0.13	0.3	0.18	0
TGCGTGGCGTGTACTGCAGAAAAC	23H-RNA	PALTA3		0.07	0.13	0.51	0	0	0	0	0	0	0	0		0	0	0	0	0.05	0		0	0	0	0.25	0	0	0	0		0	0	0	0.05	0	0
TTGCCGATGTTTCTGAGATGTCTT	23H-RNA	F43E2.6		0.49	0.26	0.19	0.07	0.12	0.21	0.24	0.17	0	0	0		0.21	0.24	0.17	0.07	0	0.34		0	0	0	0	0.1	0	0	0		0	0.05	0.13	0.1	0	0
TTGTGTCGACAACTAATTCCCGA	23H-RNA	T05E12.8		0.49	0.51	0	0	0	0.14	0.06	0.06	0	0.11	0		0.14	0.06	0.06	0	0.05	0.07		0	0.09	0.25	0	0	0.12	0	0.1		0	0.05	0	0	0	0
TTTTTTCTGTATTCTTATTTTT	23H-RNA	F52G3.8		1.05	0.57	0	0.07	0	0	0.06	0	0	0	0		0	0.06	0	0	0	0		0	0.18	0.25	0	0.1	0.12	0	0		1.59	1.26	1.22	1.75	1.48	1.21
CCGCATTTTTTGTAGATCAAA	23H-RNA	CELE14B		0.53	0.33	0	0.12	0.05	0.06	0.05	0	0	0	0		0.06	0.05	0	0.06	0.04	0		0	0.08	0	0.21	0.26	0.1	0	0.09		0.15	0.04	0	0.09	0	0
TAAACATAGCGGCGCGCGGAAC	23H-RNA	PALTA3		0	0	0.12	0	0	0	0	0.06	0	0	0		0	0	0.06	0.14	0	0.07		0	0	0.12	0	0.1	0.11	0	0.1		0	0.15	0.06	0.05	0.18	0
AAGAACAAGCCGTGGGCAAGCA	23H-RNA	F39E9.7, F55A4.4		0.42	0.57	0	0	0.12	0.21	0	0	0	0	0		0.21	0	0	0	0.05	0		0.14	0	0.25	0	0	0.12	0.09	0		0	0.05	0	0.05	0	0
AAGACCCTGTTGAGCTTGACTC	23H-RNA	F31C3.9, rrn-3.1		0.07	0.77	0.64	0.85	0.41	0.28	0	0.06	3.31	1.8	8.87		0.28	0	0.06	0.14	0.1	0		1.38	3.82	0.38	2.5	2.85	2.13	2.76	1.72		0	0	0	0	0	0
ACATCTCAGAAACATCGGCAAATG	23H-RNA	F43E2.6		0.28	0.19	0.83	0.28	0.12	0.21	0.18	0	0	0	0		0.21	0.18	0	0.07	0.05	0.07		0	0	0	0	0	0.12	0	0.1		0.35	0.2	0.06	0.25	0	0
ACGACGACGATGGCTGCGGCGAG	23H-RNA	Y57G11C.1145_hairpin		0.07	0	0.19	0	0	0.21	0.06	0.12	0	0	0		0.21	0.06	0.12	0.07	0	0.07		0	0	0	0	0	0	0	0.1		0	0	0	0	0	0
AGTGGATGACGACGACGATGGCT	23H-RNA	Y57G11C.1145_hairpin		0.21	0.19	0	0	0.06	0.07	0	0.06	0.17	0.11	0		0.07	0	0.06	0	0	0		0.14	0.27	0	0	0	0.24	0	0		0	0.1	0.19	0.3	0.55	0.2
ATGGCTGCGGCGAGGATGATGT	23H-RNA	Y57G11C.1145_hairpin		0	0.06	0	0	0	0.07	0.12	0	0	0.32	0		0.07	0.12	0	0.07	0.1	0.21		0	0.09	0.25	0	0	0.12	0	0.1		0.18	0.1	0	0.05	0.37	0
CAATAAAAACAATGGACAACTG	23H-RNA	Y59H11AR.6		0.21	0	0	0.07	0	0	0	0	0	0	0		0	0	0	0	0	0		0	0.18	0	0	0	0	0	0.1		0	0	0.06	0.15	0	0.4
CCGCCCACAGAACTGTACCTTGC	23H-RNA	H15N14.4, H37A05.4		0.21	0	0	0	0	0	0	0	0.17	0	0		0	0	0	0	0	0		0	0	0	0	0.1	0	0	0		0	0	0	0	0	0
CCGCCCACAGTTCTGTACCTTG	23H-RNA	Y24F12A.3, Y24F12A.4		0.21	0.19	0	0	0	0.07	0	0.06	0	0	0		0.07	0	0.06	0	0	0		0	0	0	0	0	0	0	0		0	0	0	0	0	0
CGACGGATCAGTGTTGCCACT	23H-RNA	T05E12.8		0.14	0.32	0	0	0	0	0.06	0	0	0.11	0		0	0.06	0	0	0	0.07		0	0	0	0	0	0	0	0		0	0	0	0	0	0
CGCGCGCCGCTATGTTTAACTC	23H-RNA	PALTA3		0.35	0.32	0	0.07	0.12	0.14	0	0.06	0	0	0		0.14	0	0.06	0	0	0.07		0	0	0	0.25	0.2	0.12	0.18	0		0	0	0	0	0	0
CGTCGTCATCCACTCCACCGA	23H-RNA	Y57G11C.1145_hairpin		0.14	0.38	0.06	0.28	0.12	0.14	0.06	0	0	0	0		0.14	0.06	0	0.14	0.29	0.48		0	0.09	0	0.25	0.1	0.12	0	0		0	0	0.06	0	0	0
CTCGCCGCAGCCATCGTCGTCG	23H-RNA	Y57G11C.1145_hairpin		0	0	0	0	0	0	0	0	0	0	0		0	0	0	0	0	0		0	0	0	0	0	0	0.09	0		0	0.05	0	0	0	0.2
GACATCTCAGAAACATCGGCA	23H-RNA	F43E2.6		0.35	0.38	0.38	0.36	0.06	0.14	0.24	0.35	0	0	0.29		0.14	0.24	0.35	0.28	0.48	0.48		0	0	0	0	0	0.24	0.28	0		0.35	0.05	0.06	0.15	0.37	0
GATAGTCTCAACAGATCGCAGT	23H-RNA	F31C3.10, F31C3.9, rrn-3.1, rrn-3.56		3	1.79	0	0.21	0.12	0.14	0.3	0.23	2.61	2.54	3.2		0.14	0.3	0.23	0.28	0.62	0.07		1.38	1.95	1.26	1.25	1.22	3.66	3.68	3.23		0	0	0	0	0	0
GATTACGTCCCTGCCCTTTGT	23H-RNA	F31C3.7, F31C3.8, rrn-1.1, rrn-1.2		0.21	0.32	0.26	0.28	0.35	0	0.06	0	0.52	0.42	0.73		0	0.06	0	0	0.05	0		0	0.36	0.5	0.5	0	0.24	0.55	0.4		0.53	0.4	0.32	0.4	0.55	0.4
TATCTCGATACCATGTCTCACC	23H-RNA	Y37E11B.2		0.21	0.32	0	0	0	0.14	0	0	0	0	0		0.14	0	0	0	0	0		0.14	0	0	0	0	0.12	0	0		0	0	0	0.05	0.18	0
TATTAGACTCCACATATCATTTC	23H-RNA	Y37E11B.2		0.84	0.26	0	0	0	0	0	0	0	0	0		0	0	0	0	0	0		0	0	0	0	0.1	0	0	0.2		0	0.1	0.13	0.05	0.18	0
TATTTTCCGACTTCTCATGAGCC	23H-RNA	other		0.49	0.45	0	0	0	0	0	0	0	0	0		0	0	0	0	0	0		0	0	0	0	0	0	0	0		0	0	0	0	0	0
TCAATGACGGAGTCGAGATCGA	23H-RNA	Y37E11B.2		0.28	0.51	0.19	0.28	0.12	0.07	0.12	0.12	0	0	0		0.07	0.12	0.12	0.07	0.1	0.14		0.14	0	0	0	0	0	0	0		0	0.05	0.06	0.1	0.37	0
TCCGGTTCAGAGCAGATGACAAC	23H-RNA	Y17D7C.3		0.21	0.06	0	0	0	0	0	0	0	0	0		0	0	0	0	0	0		0	0.09	0	0	0	0	0	0.1		0	0	0	0	0	0
TCGTCGTCATCCACTCCACCG	23H-RNA	Y57G11C.1145_hairpin		0.07	0	0	0.14	0.06	0	0.12	0	0	0	0		0	0.12	0	0.14	0.05	0.14		0	0	0	0	0	0	0.09	0		0	0.05	0	0.05	0.18	0
TGTCCCATATCGGTTTGATCTCC	23H-RNA	dnj-27_element		0.35	0.38	0	0	0	0	0	0	0	0	0		0	0	0	0	0	0		0	0	0.13	0	0.1	0.12	0.09	0		0	0	0	0	0	0
TTCGCGTAGATCACATGTAGATC	23H-RNA	pcp-4, Unknown_RE8, Y116F11B.3, Y15E3A.3, Y6B3B.7, Y6B3B.9		0.35	0.19	0	0.28	0	0.07	0	0	0	0	0		0.07	0	0	0	0	0		0	0	0.13	0	0.2	0.12	0	0.1		0	0.1	0	0.15	0.18	0
TTCGCTCTCGATTTCGCATGCCG	23H-RNA	dnj-27_element		0.03	0.03	0	0	0.09	0.11	0.09	0.06	0.09	0.11	0		0.11	0.09	0.06	0	0.1	0		0	0	0	0	0.05	0	0.14	0		0	0	0	0	0	0
TCCGCGCGCCGCTATGTTTAAC	23H-RNA	PALTA3		0.2	0.06	0.3	0.33	0.05	0	0.11	0	0	0	0		0	0.11	0	0	0	0.06		0	0.08	0.24	0	0.29	0.11	0	0.28		0	0	0.06	0.05	0.35	0
AAACCACGAATCCTAACCACT	23H-RNA	tRNA		0	0	0	0	0	0	0	0	0	0	0		0	0	0	0	0	0		0	0	0	0	0	0	0.09	0		0	0	0	0	0	0
AAATCGGAAACTCAAAGACCACA	23H-RNA	Y17D7C.3		0	0	0	0	0	0	0	0	0	0	0		0	0	0	0	0	0		0	0	0	0	0	0	0	0		0	0	0	0	0	0
AAGTGCCACCGTGTCTGGTCTCC	23H-RNA	ZK402.3		0.14	0.13	0	0	0	0	0	0.17	0	0	0		0	0	0.17	0	0	0		0	0	0	0	0	0	0.09	0		0	0	0	0	0	0
ACTTGATTTCTCTGAAAATAGCA	23H-RNA	ZK430.7		0	0.06	0	0.07	0	0	0	0	0	0	0		0	0	0	0	0	0		0	0	0	0	0.1	0	0.09	0		0	0	0	0.1	0	0
ATGATGGCGTGGAAGAAGTTGA	23H-RNA	Y57G11C.1145_hairpin		0.14	0.19	0	0	0	0	0.06	0.06	0	0	0		0	0.06	0.06	0	0	0.14		0	0	0	0.25	0	0.12	0	0		0	0.15	0	0.05	0.18	0
ATTGGGTCAGGGAAGTACTTCG	23H-RNA	W05H12.4		0.07	0.13	0	0	0	0	0	0.06	0	0	0		0	0	0.06	0	0	0		0	0	0	0	0	0	0	0		0	0	0	0	0	0
ATTGTGAAGACATCTCAGAAACA	23H-RNA	F43E2.6		0.14	0.19	0	0	0.17	0.21	0.06	0.06	0	0	0		0.21	0.06	0.06	0.14	0.43	0.34		0	0.09	0	0.25	0.2	0	0.09	0.2		0.18	0.1	0	0.1	0	0.4
CAATAAAAACAATGGACAACTGC	23H-RNA	Y59H11AR.6		0.07	0.13	0	0	0	0	0	0	0	0	0		0	0	0	0	0	0		0	0	0.13	0	0	0.12	0.09	0		0	0	0	0.1	0	0
CACGGAGTTAAATTTGAATTTTT	23H-RNA	Y69A2AR.16_hairpin		0	0	0	0	0	0.07	0	0	0	0	0		0.07	0	0	0.14	0.1	0		0	0	0.25	0.5	0.92	0.12	0.09	0		0.53	0.05	0.06	0.05	0.37	0
CATCATCCTCGCCGCAGCCATCG	23H-RNA	Y57G11C.1145_hairpin		0.35	0.06	0	0.28	0	0.07	0	0.12	0	0	0		0.07	0	0.12	0	0.05	0.07		0	0.18	0	0.25	0.1	0	0	0		0	0	0	0	0	0
CATTCCTACGACATGGAGGTCCCT	23H-RNA	C40A11.10, mir-8199		0.07	0	0	0	0	0	0	0	0	0	0		0	0	0	0	0	0		0	0	0	0	0	0	0	0		0	0	0	0	0	0
CCGCGCGCCGCTATGTTTAACT	23H-RNA	PALTA3		0.14	0.26	0	0.21	0.12	0.07	0	0.17	0	0	0		0.07	0	0.17	0.14	0.1	0.07		0	0.09	0.13	0.25	0.1	0	0.09	0.2		0.18	0.15	0.13	0.2	0.18	0
CGATGTTTCTGAGATGTCTTCA	23H-RNA	F43E2.6		0	0	0	0	0.06	0	0.06	0.06	0	0	0		0	0.06	0.06	0	0.1	0		0	0	0	0	0	0	0.09	0.1		0	0	0	0.05	0	0
CGATGTTTCTGAGATGTCTTCAC	23H-RNA	F43E2.6		0.07	0.38	0	0	0.06	0.14	0	0	0	0	0		0.14	0	0	0.07	0	0.07		0.28	0	0	0	0.1	0.12	0	0.2		0	0	0	0.05	0	0
CGCGCGGTTTGGTCCAGTCTCC	23H-RNA	E01G4.5		0	0.26	0	0	0	0	0	0	0	0	0		0	0	0	0	0	0		0	0.09	0	0	0	0	0	0		0	0	0	0	0	0
CGGAGCTCGGTTGTGTACGACC	23H-RNA	F49B2.3, Y116A8B.1		0.07	0.26	0	0	0	0	0	0	0	0	0		0	0	0	0.14	0	0		0	0	0	0	0	0	0	0		0	0	0	0	0	0
CTGTTCTGCTCTCTCTTTCAGC	23H-RNA	F55A4.9, rncs-1		0.07	0.26	0.51	0.21	0.81	0	0.06	0.12	0	0	0		0	0.06	0.12	0.21	0.1	0.07		0	0	0	0	0.2	0	0	0		0	0	0	0	0	0
TATACCACTCTATCAGACTACT	23H-RNA	W04C9.8		0.07	0	0	0	0	0	0	0	0	0	0		0	0	0	0	0	0		0	0	0	0	0	0	0	0		0	0	0	0	0	0
TCATCCTCGCCGCAGCCATCGTC	23H-RNA	Y57G11C.1145_hairpin		0.28	0	0	0.14	0	0.28	0	0	0	0	0		0.28	0	0	0.14	0.1	0.28		0	0	0	0	0.1	0	0	0		0	0.05	0	0.05	0.18	0
TCCGCGCGCCGCTATGTTTAACT	23H-RNA	PALTA3		0	0.06	0.13	0.07	0.06	0	0	0	0	0	0		0	0	0	0	0.1	0		0	0	0	0.25	0	0.12	0	0		0.18	0.1	0.06	0.1	0	0
TCGTCGTCATCCACTCCACCGA	23H-RNA	Y57G11C.1145_hairpin		0.35	0	0	0	0	0.14	0	0.12	0	0	0		0.14	0	0.12	0.14	0.24	0.34		0	0	0	0	0.1	0	0.09	0		0	0.15	0.13	0.15	0.18	0.4
TCTCCTCGTCGAAATCAAAAGG	23H-RNA	Y105C5A.14		0	0.06	0	0	0.12	0.07	0	0	0	0	0		0.07	0	0	0	0	0		0	0	0	0	0	0.12	0	0.1		0	0	0	0	0	0
TCTCTCGATGCTCGTCGATCCAG	23H-RNA	F55A4.9, rncs-1		0	0.06	0.13	0	0	0	0.12	0.12	0	0	0		0	0.12	0.12	0	0.05	0.14		0	0.09	0	0.25	0.1	0	0	0		0	0	0	0	0	0
TCTGAGATGTCTTCACAATTCTC	23H-RNA	F43E2.6		0.07	0	0	0	0	0	0	0.06	0	0	0		0	0	0.06	0	0	0		0	0	0	0	0	0	0	0		0	0	0	0	0	0
TGGACAAGTTCAGCGCGCGAACC	23H-RNA	F39E9.29_region		0.14	0.13	0	0	0	0	0	0	0	0	0		0	0	0	0.07	0	0		0	0	0	0	0	0	0	0		0	0	0	0	0	0
TGGATGATGGCGTGGAAGAAGTTG	23H-RNA	Y57G11C.1145_hairpin		0.21	0.19	0.13	0.07	0	0	0	0.06	0	0	0		0	0	0.06	0.07	0.05	0		0	0	0	0.25	0.51	0	0	0		0	0.2	0.06	0.15	0	0
TTGATCTCTATGCGACCCCACAC	23H-RNA	T05E12.10		0.28	0.57	0	0	0	0.14	0.06	0	0	0.11	0		0.14	0.06	0	0.07	0	0		0.14	0	0.13	0	0	0	0	0		0	0	0	0	0	0
TTTCCTCATCTCTGATCTTTTCC	23H-RNA	F55A4.9, rncs-1		0.21	0.19	0.19	0.71	0.46	0	0	0	0	0	0		0	0	0	0.21	0.1	0.28		0.14	0	0.13	0	0.2	0	0.09	0		0	0.05	0	0	0	0
TTACCTATCGGCTTTAAATGT	23H-RNA	PALTTAA3		0.25	0.35	0	0	0	0.06	0	0.05	0	0	0		0.06	0	0.05	0	0.09	0.06		0	0.08	0	0.23	0.18	0.11	0.08	0		0	0	0	0.23	0	0
TGTGGGCGGGGCCAATCCGGAAT	23H-RNA	H15N14.4, Y24F12A.3, Y24F12A.4		0.17	0.05	0	0	0	0	0	0.05	0	0	0		0	0	0.05	0	0	0		0	0	0	0	0	0	0	0		0	0	0	0	0	0
AAACCGCCGGAATTTTCAGCC	23H-RNA	other		0.35	0.13	0	0	0	0	0.06	0	0	0	0		0	0.06	0	0.07	0	0		0	0	0	0	0	0	0	0		0	0	0	0	0	0
AAACTGGATTGACGAGCATCGAG	23H-RNA	F55A4.9, rncs-1		0	0	0	0	0	0.07	0	0	0	0	0		0.07	0	0	0	0	0.07		0.14	0.09	0	0.5	0.31	0	0	0		0	0	0	0	0	0
AAATTGTCGGCCGCTGTGGAAAC	23H-RNA	ChrV_unknown_hairpin1		0.14	0.06	0	0	0	0.07	0.24	0.12	0	0	0		0.07	0.24	0.12	0	0	0		0.28	0	0	0	0.1	0.12	0	0.2		0	0	0	0	0	0
AAGAACAAGCCGTGGGCAAGC	23H-RNA	F39E9.7, F55A4.4		0.42	0.32	0.19	0	0	0	0.06	0	0	0	0		0	0.06	0	0	0	0		0	0	0.13	0	0	0	0.09	0.2		0	0	0	0.05	0	0
AAGGCGCGCTCGAAGAGCCGAGA	23H-RNA	ChrIII_hairpin1		0.14	0.13	0.06	0	0.12	0.14	0.24	0.35	0.17	0.21	0		0.14	0.24	0.35	1.48	1.19	0.69		0	0	0	0.5	0.2	0	0.28	0		0	0	0	0.1	0	0
AATTGTGAAGACATCTCAGAAA	23H-RNA	F43E2.6		0	0.06	0	0	0.06	0.14	0.18	0.06	0	0	0		0.14	0.18	0.06	0.14	0.1	0.14		0	0	0.13	0.25	0.2	0.24	0.09	0.2		0	0.05	0	0	0	0
ACCGGACCCTGCCTCTTCATC	23H-RNA	Y57G11C.1145_hairpin		0.14	0.13	0	0	0.29	0	0	0	0	0	0		0	0	0	0	0	0		0	0.09	0	0	0.2	0	0.18	0		0	0	0	0	0	0
ACCTGAACTTTTTGGATCAACA	23H-RNA	T05E12.10		0.07	0	0	0	0	0.07	0	0.12	0	0	0		0.07	0	0.12	0.07	0.05	0		0	0.09	0.13	0.25	0	0.12	0.09	0		0	0	0.06	0	0	0
ACGTGTCGCTTCGTCATCTGATG	23H-RNA	F55A4.9, rncs-1		0.07	0.26	0	0.07	0	0	0	0.06	0	0	0		0	0	0.06	0.14	0.05	0.21		0	0	0	0	0.2	0	0.18	0		0.18	0.05	0.13	0	0	0.2
AGAGGTCCAAGTAAGATGATA	23H-RNA	F39E9.7		0.14	0.13	0	0	0	0	0	0	0	0	0		0	0	0	0	0	0		0	0	0	0	0	0	0	0		0	0	0	0	0	0.2
AGCAGACGCTCATGACCACTT	23H-RNA	Y17D7B.4		0	0	0	0	0	0	0	0	0	0	0		0	0	0	0	0	0		0	0	0	0	0	0	0	0		0	0	0	0	0	0
AGCCAATATCGGACGATGAAGC	23H-RNA	other		0.14	0.13	0	0	0	0.07	0	0	0	0	0		0.07	0	0	0	0	0		0	0	0	0	0	0	0	0		0.18	0	0	0	0	0
AGTGGAGTGGATGACGACGACGAT	23H-RNA	Y57G11C.1145_hairpin		0.14	0	0.26	0	0	0.07	0.12	0	0	0	0		0.07	0.12	0	0.14	0.05	0.21		0	0.09	0.13	0.25	0.41	0	0.09	0		0.53	0.75	0.19	0.25	0.18	0
AGTGGATGACGACGACGATGGC	23H-RNA	Y57G11C.1145_hairpin		0	0.13	0	0.14	0.06	0	0.24	0.06	0	0.21	0		0	0.24	0.06	0	0	0.21		0	0	0	0	0	0	0	0.4		0	0.05	0.06	0	0	0
ATCCTTGTACCAGTTATCTGCA	23H-RNA	K02E2.11		0.14	0.13	0	0	0	0	0	0	0	0	0		0	0	0	0	0	0		0	0	0	0	0	0	0	0		0	0	0	0	0	0
ATGATGGCGTGGAAGAAGTTG	23H-RNA	Y57G11C.1145_hairpin		0	0	0	0	0	0	0	0	0	0	0		0	0	0	0	0	0		0	0	0	0	0	0.12	0	0		0.18	0.05	0	0	0	0.2
ATGATGGCGTGGAAGAAGTTGAT	23H-RNA	Y57G11C.1145_hairpin		0	0	0	0	0	0.07	0	0	0	0	0		0.07	0	0	0	0	0		0	0	0.13	0	0	0	0	0.1		0	0.15	0	0.05	0	0
ATTTGCCGATGTTTCTGAGAT	23H-RNA	F43E2.6		0.91	0.38	1.73	1.78	3.54	0.63	0.65	0.52	0	0.21	0.15		0.63	0.65	0.52	0.56	0.43	0.69		1.1	0.71	0.5	0.25	0.31	1.77	0.64	1.21		2.48	3.82	2.31	3.21	3.51	4.04
CAAAATACCAGATTGTCCTTCA	23H-RNA	F39E9.29_region		0.14	0.19	0	0	0	0	0	0	0	0	0		0	0	0	0	0	0		0	0	0	0	0	0	0.18	0		0	0.05	0	0.05	0	0
CAGCGAATCGCTCTGCCCACTTT	23H-RNA	Y116A8C.27		0.07	0.06	0	0	0	0	0.06	0	0	0	0		0	0.06	0	0	0	0		0	0.09	0	0	0	0	0	0		0	0	0	0	0	0
CAGCGTGAACTGTCGAGAGTGC	23H-RNA	linc-68, Y49F6A.10		0	0.06	0	0	0	0	0	0	0	0	0		0	0	0	0	0	0		0	0	0	0	0.1	0	0	0		0	0	0	0	0	0
CAGTGGAGTGGATGACGACGACG	23H-RNA	Y57G11C.1145_hairpin		0	0	0.06	0	0	0.07	0	0	0	0	0		0.07	0	0	0.07	0	0.07		0	0	0	0	0	0	0	0		0	0	0.06	0	0	0
CATCTCAGAAACATCGGCAAATGG	23H-RNA	F43E2.6		0.28	0.64	0.64	0.07	0.12	0	0.06	0	0	0	0		0	0.06	0	0	0.1	0.14		0.14	0	0	0	0.2	0	0	0		0	0.05	0.06	0	0	0
CATTTTTGGTAAGCAGAACTGGC	23H-RNA	F31C3.9, rrn-3.1		0.07	0.26	2.24	1.92	1.57	0	0.06	0.12	1.22	0.63	0.87		0	0.06	0.12	0.07	0.1	0.14		1.79	2.4	1.77	5.25	3.56	3.07	3.49	2.93		0.53	0.15	0.13	0.2	0	0.2
CCACCGTGTCTGGTCTCCTCGCC	23H-RNA	ZK402.3		0.07	0	0	0	0	0	0	0	0	0	0		0	0	0	0.07	0	0		0	0	0	0	0	0	0	0		0	0	0	0	0	0
CCATCAGCACCAACACCTCACC	23H-RNA	C36A4.14		0.21	0	0	0	0	0	0	0	0	0	0		0	0	0	0	0	0		0	0	0	0	0	0	0	0		0	0	0	0	0	0
CCATCGGACGAGCTCTTATCCCC	23H-RNA	T05E12.8		0.14	0.19	0	0	0	0	0	0	0	0	0		0	0	0	0	0	0.07		0.14	0	0	0	0	0	0	0		0	0	0	0	0	0
CCCCATTGCCGAATGTTTGAAT	23H-RNA	Y37E3.30		0.28	0.13	0	0	0	0.14	0.06	0	0	0	0		0.14	0.06	0	0	0.05	0		0	0	0	0	0	0	0	0		0.18	0	0	0	0	0
CCCTTCTACTTGGACGGAACA	23H-RNA	Y17D7C.3		0.21	0.57	0	0	0	0	0.06	0	0	0	0		0	0.06	0	0	0	0		0	0	0.13	0	0	0	0.09	0		0	0	0	0	0	0
CCGATGTTTCTGAGATGTCTT	23H-RNA	F43E2.6		0.07	0.06	0	0	0.06	0	0	0	0	0	0		0	0	0	0.07	0	0.07		0.14	0	0	0	0	0	0	0		0	0	0	0	0	0
CCGTCTAGGTGATCTTTCAACAC	23H-RNA	Y37E3.30		0.28	0.45	0.06	0	0	0.14	0	0	0	0	0		0.14	0	0	0	0	0		0	0	0	0	0	0	0	0.1		0	0	0	0	0	0
CGCGCGCCGCTATGTTTAACTT	23H-RNA	PALTA3		0.07	0.06	0	0	0	0	0	0	0	0	0		0	0	0	0	0	0		0	0	0	0	0	0.24	0	0		0	0	0.06	0.05	0	0
CGGGAGGAAAGCTGGGATTATCC	23H-RNA	Y37E3.30		0.07	0.19	0	0	0	0	0.06	0	0	0	0		0	0.06	0	0	0	0.07		0.14	0	0	0	0	0	0	0.1		0.18	0	0	0	0	0
CGGGATGATGGATCGGGATGAA	23H-RNA	T05E12.10		0	0.19	0	0	0	0	0.06	0.06	0	0	0		0	0.06	0.06	0	0.05	0		0.14	0	0	0	0	0	0.09	0.2		0	0.05	0	0.15	0	0.2
CTATCAATACTCTATGTTTTTT	23H-RNA	C35D6.3		0	0	0	0	0	0	0	0	0	0	0		0	0	0	0	0	0		0	0	0	0	0	0	0	0		0	0	0	0	0	0
CTATTTTGATAAGTCACTGACAC	23H-RNA	F39E9.29_region		0.28	0.64	0	0	0	0	0	0	0	0	0		0	0	0	0	0	0		0	0	0	0	0	0	0	0		0	0	0	0	0	0
CTCAAAATAATAAAACTGCGTGG	23H-RNA	PALTA3		0.14	0	0	0	0.06	0	0.06	0	0	0	0		0	0.06	0	0	0	0		0	0	0	0	0	0	0	0		0	0	0	0	0	0
GACATCTCAGAAACATCGGCAA	23H-RNA	F43E2.6		0.21	0.19	0.38	0.28	0.35	0.42	0.24	0.58	0.35	0.32	0.29		0.42	0.24	0.58	0.42	0.57	0.21		0	0	0	0	0	0	0.37	0.1		0.18	0.05	0	0.1	0	0
GACATCTCAGAAACATCGGCAAA	23H-RNA	F43E2.6		0.35	0.19	0.13	0.14	0.17	0.28	0.06	0.23	0	0	0.15		0.28	0.06	0.23	0.35	0.29	0.07		0	0	0.13	0	0	0	0.09	0		0	0.05	0.06	0.15	0	0
GATGATGGCGTGGAAGAAGTTG	23H-RNA	Y57G11C.1145_hairpin		0	0.06	0.32	0.57	0.35	0.42	0.59	0	0.7	0.95	0.44		0.42	0.59	0	0.35	0.19	0.07		0.41	0.44	0.25	0	0.2	0.47	0.64	0.81		0.71	0.96	1.09	1.1	0.37	2.22
GATTTAGCGCCCCGACATTGA	23H-RNA	F31C3.10, F31C3.9, rrn-3.1, rrn-3.56		0.35	0.45	0.26	0.57	0.46	0.56	0.41	0.17	0.52	0.63	1.31		0.56	0.41	0.17	1.06	0.29	0.48		0.14	0.44	0.25	0.25	0.31	0.24	0.55	0.71		0	0	0	0	0	0
GGTGGAGTGGATGACGACGACG	23H-RNA	Y57G11C.1145_hairpin		0.28	0.45	0.77	0.14	0.35	0.84	0.41	0.58	2.44	1.48	0.87		0.84	0.41	0.58	0.07	0.29	0.34		0.83	0.62	0.88	0.5	0.41	1.54	1.38	0.81		1.77	1.96	1.48	2.15	1.85	2.63
GGTGGAGTGGATGACGACGACGA	23H-RNA	Y57G11C.1145_hairpin		0.21	0	0	0.14	0.29	0.07	0	0.12	0.17	0.53	0		0.07	0	0.12	0.21	0.14	0.14		0.14	0	0	0	0.2	0.71	0.09	0.61		0.35	0.55	0.32	0.5	0.18	0.4
GTGAAGACATCTCAGAAACATCG	23H-RNA	F43E2.6		0.21	0.06	0.32	0.43	0.12	0.14	0.12	0.12	0	0.11	0		0.14	0.12	0.12	0.14	0.1	0.07		0	0.18	0.38	0	0.1	0.24	0	0.3		0.53	0.1	0.13	0.15	0.18	0.4
TAAACATAGCGGCGCGCGGAACT	23H-RNA	PALTA3, talp-3, Y48A6C.4, Y57G11C.32		0.14	0.13	0.13	0	0.06	0.07	0	0	0	0	0		0.07	0	0	0	0.05	0.07		0	0	0	0	0.1	0	0	0.1		0	0.1	0.13	0.15	0	0.4
TAAAGTCCATGGACGGCGAGATT	23H-RNA	other		0	0	0	0	0	0	0	0	0	0.21	0		0	0	0	0	0	0		0	0	0	0	0	0	0	0		0	0	0	0	0	0
TAGAAGACCACTTCCGCAGACG	23H-RNA	Y37E3.30		0	0.13	0	0	0	0	0	0	0	0	0		0	0	0	0	0.05	0		0	0	0	0	0	0.12	0	0.1		0	0.05	0	0	0	0
TCTCAATGGAAAATTCTGCATG	23H-RNA	F31A9.2		0.21	0.13	0	0	0	0.14	0.06	0.06	0	0	0		0.14	0.06	0.06	0	0.05	0		0	0	0	0	0	0	0	0		0.18	0	0	0.05	0.18	0
TGAAGACATCTCAGAAACATCG	23H-RNA	F43E2.6		0.07	0.06	0	0	0	0	0	0	0	0	0		0	0	0	0.07	0	0		0	0.09	0	0.25	0.1	0.24	0.09	0.1		0	0	0	0	0	0
TGAAGACATCTCAGAAACATCGGC	23H-RNA	F43E2.6		0.14	0	0	0	0	0	0	0	0	0	0		0	0	0	0	0	0		0	0	0	0	0	0	0	0		0	0	0	0	0	0
TGGATGATGGCGTGGAAGAAGTT	23H-RNA	Y57G11C.1145_hairpin		0.21	0.13	0	0	0.06	0	0.06	0	0	0	0.15		0	0.06	0	0	0.1	0.28		0	0	0.25	0.25	0.1	0	0.09	0		0.35	0.05	0.06	0.2	0.18	0.2
TGTATTAAACGGTAAGGGCCG	23H-RNA	mir-5592		0.07	0	0.9	0.64	0.75	1.27	0.77	0.64	0.87	0.21	0.15		1.27	0.77	0.64	0.56	0.86	0.55		1.66	1.24	1.01	1.75	3.46	1.3	1.19	1.11		2.83	1.61	1.86	1.45	2.03	1.42
TGTATTAAACGGTAAGGGCCGGC	23H-RNA	mir-5592		0.14	0.57	40.08	55.97	55.52	24.26	21.52	22.64	6.44	10.25	6.83		24.26	21.52	22.64	23.68	27.89	31.64		63.58	61.64	53.62	104.29	102.35	80.33	76.82	88.98		37.14	36.64	39.99	27.46	28.83	30.33
TGTTCGTCCTCCATACATTGCC	23H-RNA	C36A4.14		0.07	0.06	0	0	0	0	0	0	0	0	0		0	0	0	0	0	0		0	0	0	0	0	0	0	0		0	0	0	0	0	0
TTCGAGACTCGTCAGATCTGC	23H-RNA	K02E2.6		0.14	0.32	0	0.21	0	0.21	0	0	0	0	0		0.21	0	0	0	0	0		0	0	0	0	0.1	0	0.09	0		0	0	0	0	0	0.2
TTCTGGAATGAAACGAGTGCTGC	23H-RNA	Y116A8B.1		0.42	0.45	0	0	0	0.07	0.18	0	0	0	0		0.07	0.18	0	0	0.1	0		0	0	0.13	0	0	0	0.18	0		0	0	0	0	0	0
TTGATCTCTATGCGACCCCACA	23H-RNA	T05E12.10		0.28	0.13	0	0	0	0.07	0.12	0.06	0	0	0		0.07	0.12	0.06	0.07	0.1	0		0.14	0	0	0.25	0	0	0.09	0		0	0	0	0	0	0
TTGCCGATGTTTCTGAGATGT	23H-RNA	F43E2.6		0.28	0.06	0	0.07	0.41	0	0.36	0.06	0	0	0		0	0.36	0.06	0.14	0.05	0.07		0.28	0.27	0.25	0	0.41	0.12	0.28	0.4		0	0.05	0.19	0.25	0	0.2
TTGGAATCCGCTTAACAATTGG	23H-RNA	Y105C5A.1272, Y105C5A.14		0	0.19	0	0	0	0	0	0.06	0	0	0		0	0	0.06	0	0	0		0	0	0.13	0	0	0.12	0	0		0	0	0	0	0	0
TTGGCCAAGCGGACTGGAGCACA	23H-RNA	F55A4.9, rncs-1		0.07	0.13	0	0.14	0	0	0.06	0	0	0	0		0	0.06	0	0	0	0		0	0	0	0	0	0	0	0		0.18	0.05	0	0	0	0
TTTCTGTCATCACCCGCGGGGCT	23H-RNA	other		0.14	0.06	0	0	0	0	0	0	0	0	0		0	0	0	0	0.05	0.07		0	0	0	0	0	0	0	0		0	0.05	0.06	0.05	0	0
TTTTCCCATCCAACTGACTGA	23H-RNA	W04B5.8		0.63	0.77	0.51	0.21	0.58	0	0.06	0	0	0	0		0	0.06	0	0	0.1	0.07		0	0	0.13	0	0	0	0.09	0.1		0	0.1	0.19	0.1	0	0
TTTTCTGCAGTACACGCCACGC	23H-RNA	PALTA3		0.14	0.25	0	0	0.23	0.07	0	0.06	0.17	0.21	0		0.07	0	0.06	0	0	0		0	0.09	0	0	0.1	0.47	0	0		0	0	0	0.05	0	0
AATTTTGCCTTTTCCCCGTGAGT	23H-RNA	PALTA3		0	0	0	0	0	0	0	0	0	0	0		0	0	0	0	0	0		0	0	0	0	0	0	0	0		0	0	0	0.04	0	0
AAACGGAATCGCTGTCCCGGAC	23H-RNA	F39E9.7		1.05	0.51	0	0.07	0	0	0.12	0.06	0	0	0		0	0.12	0.06	0.07	0.05	0		0	0.09	0	0	0	0.12	0.28	0.1		0	0	0	0	0	0
AAATCACCGTCTAATTTTGAGT	23H-RNA	other		0	0.13	0	0	0	0	0	0	0	0	0		0	0	0	0	0	0		0	0	0.13	0	0	0	0	0		0	0	0	0.05	0	0
AAATTCAAATTTAACTCCGTGAC	23H-RNA	Y69A2AR.16_hairpin		0.07	0	0	0	0	0	0	0	0	0	0		0	0	0	0	0	0		0	0	0.13	0.25	0.31	0	0	0		0.18	0.05	0	0.05	0	0
AAATTGTCGGCCGCCGTGGAAAC	23H-RNA	Unknown_hairpin_RE2		0.07	0.13	0.19	0	0.12	0	0	0	0	0	0		0	0	0	0.07	0	0.07		0.14	0	0	0.25	0	0.12	0	0		0	0	0	0.1	0	0.2
AACAACCCTGAACCAGACGTA	23H-RNA	F31C3.11, rrn-2.1		0.14	0.13	0.26	0.14	0.23	0.07	0.21	0.09	0.09	0.48	0.15		0.07	0.21	0.09	0.11	0.14	0.14		0.07	0	0	0.13	0	0	0	0		0	0	0	0	0	0
AATTCCAAAACTGCTGTTTCCCC	23H-RNA	Y59H11AR.6		0.07	0.13	0	0	0	0	0	0	0	0	0		0	0	0	0	0	0		0	0	0	0	0	0	0	0		0	0	0	0	0	0
AATTCTCTCGTAGAACGTGTCGC	23H-RNA	F55A4.9, rncs-1		0	0	0.06	0	0.17	0	0.06	0	0	0	0		0	0.06	0	0	0	0		0	0	0	0.25	0	0	0	0.1		0	0	0	0.05	0	0
AATTGTCGGCCGCCGTGGAAAAC	23H-RNA	other		0	0.06	0	0	0	0	0	0	0	0	0		0	0	0	0	0	0		0.14	0	0	0	0	0.24	0	0		0	0	0	0.05	0	0
AATTGTGAAGACATCTCAGAA	23H-RNA	F43E2.6		0.28	0.26	0.32	0.21	0	0	0.06	0	0	0.32	0		0	0.06	0	0.14	0.19	0		0	0	0.13	0	0.2	0	0.18	0.1		0	0.05	0.06	0	0	0
ACCTACGTACAACACCGGGCTC	23H-RNA	T05E12.8		0.07	0.13	0	0	0	0.07	0	0	0	0	0		0.07	0	0	0	0	0		0.14	0	0	0	0	0	0	0		0	0	0	0	0	0
AGAAACTTGGACTTTTTCGCTGG	23H-RNA	F55A4.9, rncs-1		0	0	0	0	0	0	0	0	0	0	0		0	0	0	0.07	0	0.14		0.14	0.09	0	0	0.2	0	0.09	0		0	0	0	0	0	0
AGACATCTCAGAAACATCGGCAAA	23H-RNA	F43E2.6		0	0	0	0	0	0.07	0	0	0	0	0		0.07	0	0	0	0	0		0	0	0	0	0	0	0	0		0	0	0	0	0	0
AGTGGGCCGAGCGATTCGCTGAT	23H-RNA	Y116A8C.27		0	0	0.06	0	0	0	0	0	0	0	0		0	0	0	0.07	0	0		0	0	0	0	0	0	0	0		0	0	0	0	0	0
AGTGGTTCGTGGCTTCCAAATCC	23H-RNA	T05E12.8		0.07	0.06	0	0	0	0	0	0	0	0	0		0	0	0	0	0	0		0	0	0	0	0	0	0.09	0		0	0	0	0	0	0
AGTGTAGTCAGCTGAAGAGACA	23H-RNA	rft-2, Y47D7A.14_IR, Y47D7A.14_IR_element		0	0.06	0	0	0	0.14	0	0.06	0	0	0		0.14	0	0.06	0.07	0.05	0.14		0	0	0	0	0.1	0	0.09	0		0	0	0	0.1	0	0
AGTTGGTTGATGCTTGTCCGG	23H-RNA	F31C3.9, rrn-3.1		0	0	0	0.28	0.06	0	0.06	0.12	0.17	0	0		0	0.06	0.12	0.14	0.1	0.07		0	0	0.13	0	0.1	0	0.09	0.2		0	0.1	0.13	0	0	0.2
ATACGGCTAGCCATATAAAGACC	23H-RNA	C36A4.14		0.07	0	0	0	0	0	0	0	0	0	0		0	0	0	0	0	0		0	0	0	0	0	0	0	0		0	0	0	0	0	0
ATCGTCGTCGTCATCCACTCCAC	23H-RNA	Y57G11C.1145_hairpin		0.49	0.38	0	0	0	0	0	0.12	0	0	0.29		0	0	0.12	0.07	0	0.07		0.14	0.18	0	0	0.2	0	0	0.2		0.18	0	0.06	0.05	0.18	0.2
ATGACGACGACGATGGCTGCGG	23H-RNA	Y57G11C.1145_hairpin		0.28	0.13	0	0.07	0	0.07	0.3	0.17	0.35	0	0.15		0.07	0.3	0.17	0.14	0.05	0.21		0.55	0.09	0	0	0.2	0.24	0.18	0		0	0.05	0.13	0.05	0	0
ATTCTCTCGTAGAACGTGTCGCTT	23H-RNA	F55A4.9, rncs-1		0.07	0.13	0	0.14	0.06	0	0	0.06	0	0	0		0	0	0.06	0.07	0.1	0		0	0	0	0.25	0.1	0	0	0		0	0	0.06	0	0	0
CAAACTGGATTGACGAGCATCGAG	23H-RNA	F55A4.9, rncs-1		0	0.06	0	0	0	0	0	0.06	0	0	0		0	0	0.06	0	0	0.07		0	0	0	0	0	0	0	0		0	0	0	0	0	0
CAAGTGCGACATAAAGGGAACA	23H-RNA	T05E12.10		0	0.19	0	0	0	0.14	0.06	0	0	0	0		0.14	0.06	0	0	0	0		0	0	0.13	0	0	0	0	0		0.18	0	0	0.05	0.18	0
CAATGGAGCGGTGTAAACTTTT	23H-RNA	E01G4.7		0.28	0.45	0	0	0	0	0	0	0	0.11	0		0	0	0	0	0.05	0		0	0.09	0	0	0	0	0.09	0		0	0.05	0	0	0	0
CACTAATAGGGAACGTGAGCT	23H-RNA	F31C3.10, F31C3.9, rrn-3.1, rrn-3.56		0	0.06	0.96	1.64	0.87	0	0.06	0	1.74	0.42	0.73		0	0.06	0	0.14	0.05	0.14		0.83	0.53	0.76	1	1.02	0.59	0.92	0.71		2.48	1.11	1.09	1.3	1.29	1.21
CATATCCCATGAATTGTCCGCA	23H-RNA	linc-17, Y49F6A.9		0	0	0	0	0	0	0	0	0	0	0		0	0	0	0	0	0		0	0	0	0	0	0	0	0		0	0	0	0	0	0
CATCGTCGTCGTCATCCACTCCA	23H-RNA	Y57G11C.1145_hairpin		0	0.06	0	0	0	0	0	0	0	0	0		0	0	0	0	0	0		0	0.09	0	0	0.1	0	0	0		0	0.05	0	0.05	0	0
CATGGCCGTTCTTAGTTGGTGGA	23H-RNA	F31C3.7, F31C3.8, rrn-1.1, rrn-1.2		0	0.19	0.06	0.07	0	0	0	0	0	0	0		0	0	0	0	0	0		0.14	0.09	0	0	0	0.12	0.37	0.1		0	0.05	0	0	0	0
CCATCGGACGAGCTCTTATCCCCT	23H-RNA	T05E12.8		0.21	0	0	0	0	0.07	0	0	0	0	0		0.07	0	0	0	0	0		0	0	0	0	0	0	0	0.1		0	0	0	0	0	0
CCATCGTCGTCGTCATCCACTCC	23H-RNA	Y57G11C.1145_hairpin		0.07	0.13	0	0.14	0	0	0	0	0	0	0		0	0	0	0	0	0		0	0	0	0	0.1	0	0.18	0		0	0	0	0	0	0
CCTCAATGTGTGCCTGCTTCT	23H-RNA	Y37E11B.2		0.07	0.06	0.06	0	0	0	0	0	0	0	0		0	0	0	0.07	0.05	0		0	0.09	0	0	0	0	0	0		0	0	0	0	0	0
CCTTGATTCTCAAAGTGCAGACC	23H-RNA	W03D2.15		0.14	0	0	0	0	0	0	0	0	0	0		0	0	0	0	0	0		0	0	0	0	0	0	0	0		0	0	0	0	0	0
CGACGACGATGGCTGCGGCGAGG	23H-RNA	Y57G11C.1145_hairpin		0	0.13	0	0.14	0.06	0	0.18	0.12	0.52	0	0		0	0.18	0.12	0.14	0	0.07		0	0	0	0	0.1	0.12	0.09	0.1		0	0	0.06	0	0	0
CGACGACGATGGCTGCGGCGAGGA	23H-RNA	Y57G11C.1145_hairpin		0.07	0.13	0	0	0	0	0	0	0	0	0		0	0	0	0	0	0		0.14	0	0	0	0	0	0	0		0	0	0	0.05	0	0
CGACGTGTTCCAGCATTCTTCGAC	23H-RNA	Y37E3.30		0.07	0	0	0	0	0	0.06	0	0	0	0		0	0.06	0	0	0	0		0	0	0	0	0	0	0	0		0	0	0	0	0	0
CGGAATGGTTCAAAAATCGAGCC	23H-RNA	F52G3.8		0.07	0.06	0	0	0	0	0.06	0	0	0	0		0	0.06	0	0	0	0		0	0	0	0	0	0	0	0		0	0	0	0	0	0
CGTACACAACCGAGCTCCGCC	23H-RNA	F49B2.3, Y116A8B.1		0.07	0	0	0	0	0	0	0	0.17	0	0		0	0	0	0.07	0	0		0	0	0	0	0	0	0	0		0	0	0	0	0	0
CTAAGACTGTTTCTGATCACAA	23H-RNA	F43E2.13, F43E2.6, linc-169		0	0.06	0	0	0	0	0	0	0	0	0		0	0	0	0	0.05	0		0.14	0	0	0	0	0	0	0		0.18	0.05	0	0	0	0
CTCGCCGCAGCCATCGTCGTCGT	23H-RNA	Y57G11C.1145_hairpin		0.21	0	0	0	0	0	0	0	0	0	0		0	0	0	0	0	0		0	0	0	0	0.1	0	0	0		0	0	0	0	0	0
CTCTCGATGCTCGTCGATCCAGT	23H-RNA	F55A4.9, rncs-1		0	0.13	0.38	0	0.06	0.07	0	0	0	0	0		0.07	0	0	0.07	0	0.07		0	0.18	0	0	0.2	0	0	0		0	0	0	0	0	0
CTTAGGTCACTGGTTCGAATCC	23H-RNA	other		0.07	0.06	0.45	0.14	0.06	0.07	0	0	0	0.11	0		0.07	0	0	0.07	0.1	0.14		0	0	0	0.5	0.61	0.59	0.28	0.4		0	0.5	0.77	0.45	0.18	0.2
GACGTACCAACTGGAGGCCCA	23H-RNA	F31C3.11, rrn-2.1		1.32	0.45	1.02	2.07	1.51	1.62	1.66	1.74	3.48	2.54	4.22		1.62	1.66	1.74	1.69	2.19	1.38		0.28	0.18	0.63	0.25	0.1	0.47	0.74	1.11		0	0	0	0	0	0
GACTGGACCAAACCGCGCGCT	23H-RNA	E01G4.5		0.07	0.32	0	0	0	0.14	0.06	0.17	0	0	0		0.14	0.06	0.17	0.14	0	0.21		0	0	0	0	0	0	0	0		0	0	0	0	0	0
GCAGCCAAAGACTGATCGATTC	23H-RNA	F31C3.9, rrn-3.1		0.49	0.32	0.38	0.14	0.12	0.07	0.06	0.06	1.04	0.32	0.29		0.07	0.06	0.06	0.07	0.48	0.41		0.41	0.18	0.25	0.25	0.1	5.67	7.26	5.96		0	0	0	0	0	0
GCTACACCTCTCATGACTCTT	23H-RNA	F31C3.9, rrn-3.1		0.56	0.77	0.19	0.57	0.12	0.07	0	0.12	1.57	2.64	1.6		0.07	0	0.12	0.14	0.1	0.41		0	0.62	0.13	0.5	1.02	2.24	2.21	2.32		0	0	0	0	0	0
GTATTAAACGGTAAGGGCCGGC	23H-RNA	mir-5592		0.14	0.26	26.06	26.99	28.43	14.55	15.53	17.53	4.18	2.85	1.31		14.55	15.53	17.53	15.86	20.33	17.92		20.55	19.1	16.65	43.01	39.51	21.38	24.63	22.82		18.92	19.07	18.42	14.03	11.46	13.35
TACGGGAAAAGCAGAGAGGCC	23H-RNA	F39E9.7		0.21	0	0	0	0	0	0	0	0	0	0		0	0	0	0.07	0.05	0.14		0	0	0	0	0	0.12	0	0		0	0	0.06	0	0	0
TACGTTTACATGGAGGTCCCGC	23H-RNA	F39E9.29_region, F39E9.7		0.14	0	0	0	0	0	0	0	0	0	0		0	0	0	0	0	0		0	0.18	0	0	0	0	0	0		0	0	0	0	0	0
TAGAAGCCGCCGGGATGGACACC	23H-RNA	E01G4.5		0	0	0	0	0	0	0	0	0	0	0		0	0	0	0	0	0		0	0	0	0	0	0	0	0		0	0	0	0	0	0
TATTAGACTCCACATATCATTT	23H-RNA	Y37E11B.2		0.63	0.45	0	0	0	0	0	0.06	0	0	0		0	0	0.06	0	0	0.07		0	0.18	0	0	0	0.24	0	0		0	0.25	0.13	0.05	0	0.2
TATTTTTTGGCACCGCTGTTCTG	23H-RNA	F55A4.9, rncs-1		0	0.13	0	0	0	0	0	0	0	0	0		0	0	0	0	0.05	0.07		0.14	0	0	0	0	0.12	0	0		0	0.05	0.06	0.05	0	0
TCCCTGCCCTTTGTACACACCG	23H-RNA	F31C3.7, F31C3.8, rrn-1.1, rrn-1.2		0	0.45	0	0	0	0	0	0	0	0.11	0		0	0	0	0.07	0	0		0	0.09	0	0	0.1	0	0.09	0.1		0	0	0	0	0	0
TCCGGTTCAGAGCAGATGACAA	23H-RNA	Y17D7C.3		0.07	0	0	0	0	0	0	0	0	0	0		0	0	0	0	0	0		0	0	0	0	0	0	0	0		0	0	0	0	0	0
TCGCCGCAGCCATCGTCGTCGTC	23H-RNA	Y57G11C.1145_hairpin		0	0	0	0	0	0.14	0	0	0	0.11	0		0.14	0	0	0.21	0	0		0	0	0.13	0	0	0	0	0.1		0	0	0	0	0	0
TCTCAGAAACATCGGCAAATGG	23H-RNA	F43E2.6		0.07	0	0	0	0.06	0.07	0	0	0.17	0	0		0.07	0	0	0	0	0		0	0	0	0.25	0.1	0.12	0.09	0		0	0	0	0	0	0
TCTTAGAACCCATATATACCCCCT	23H-RNA	Y116F11A.1		0.14	0.13	0	0	0	0	0	0	0	0	0		0	0	0	0	0	0		0	0	0	0	0	0	0	0		0	0	0	0	0	0
TGCTTTCCTCATCTCTGATCTT	23H-RNA	F55A4.9, rncs-1		0.07	0.06	1.98	0.57	1.1	0.28	0.12	0.23	0	0	0		0.28	0.12	0.23	0	0	0.28		0	0	0	0	0.41	0	0	0.2		0	0	0	0	0	0.2
TGGAGACCCTCACCTACCTGCG	23H-RNA	other, Y116A8B.1		0	0.06	0	0	0	0	0	0	0	0	0		0	0	0	0	0	0		0	0	0	0	0	0	0	0		0	0	0	0	0	0
TGTGATTTTGGATTAAACTCA	23H-RNA	Y59H11AR.6		0.35	0.19	0	0.07	0	0	0	0	0	0	0		0	0	0	0.07	0.05	0		0	0.36	0	0	0	0.35	0.09	0		0	0	0	0	0	0
TTCATTCACATCGGCTGCCATCC	23H-RNA	T05E12.8		0.07	0	0	0	0	0	0	0	0	0	0		0	0	0	0.07	0	0		0	0	0	0	0	0	0	0.2		0	0.05	0	0	0	0
TTCCTCGTTTGGATATGTAGAAGA	23H-RNA	Y17D7C.3		0.56	0.26	0	0	0	0	0	0	0	0	0		0	0	0	0	0	0		0	0	0	0	0	0	0	0		0	0	0	0	0	0
TTCGAGACTCGTCAGATCTGCAT	23H-RNA	K02E2.6		0.07	0	0	0	0	0	0	0	0	0	0		0	0	0	0	0	0		0	0	0	0	0	0	0	0		0	0	0	0	0	0
TTCTCTCGTAGAACGTGTCGCT	23H-RNA	F55A4.9, rncs-1		0	0.13	0.13	0.07	0.12	0.07	0.12	0.12	0	0	0		0.07	0.12	0.12	0	0	0.07		0	0	0	0	0.41	0	0.09	0		0.18	0	0	0.05	0	0.2
TTTCGGGGTACGGTATCTAATA	23H-RNA	ChrIII_hairpin2		0	0	0	0	0	0	0	0	0	0	0		0	0	0	0	0	0		0	0	0	0	0	0	0	0		0	0	0	0	0	0
TTTCTGAGATGTCTTCACAATTCT	23H-RNA	F43E2.6		0	0.13	0	0.21	0	0	0	0	0	0	0		0	0	0	0.07	0	0.34		0	0	0	0	0.1	0.12	0	0		0	0	0.06	0	0.18	0
CTTTTTCAGCGGTCTCGTTATG	23H-RNA	PAL5A		0.07	0.06	0.19	0	0	0	0	0	0	0	0		0	0	0	0	0	0		0.14	0	0	0	0	0	0	0		0	0	0	0	0	0
TCAAAATCGGACGACCGGACGC	23H-RNA	Unknown_hairpin_RE2		0	0.06	0	0	0	0	0	0.06	0	0	0		0	0	0.06	0	0.05	0		0	0	0	0	0	0	0	0		0	0.05	0	0	0	0
TTAAACATAGCGGCGCGCGGAA	23H-RNA	PALTA3		0	0.06	0	0.28	0.06	0.07	0	0	0	0	0		0.07	0	0	0	0	0		0	0	0	0	0	0	0	0		0	0.1	0	0.05	0.18	0
CGCATTTTTTGTAGATCAAACC	23H-RNA	CELE14B		0.19	0.12	0	0	0	0	0	0.05	0	0	0		0	0	0.05	0	0	0		0	0.24	0.23	0	0	0	0	0		0	0.05	0	0.05	0	0
TTTGATCTACAAAAAATGCGGG	23H-RNA	CELE14B		0.06	0	0.06	0.18	0.05	0	0.05	0	0	0	0		0	0.05	0	0	0.04	0.12		0	0	0	0	0	0	0	0		0.15	0.09	0.11	0.09	0	0.35
CTCTTCAGCTGACTACACTCTCT	23H-RNA	rft-2, Y47D7A.14_IR, Y47D7A.14_IR_element		0.05	0	0	0	0	0	0	0	0	0	0		0	0	0	0	0.04	0		0	0	0	0	0	0	0	0		0	0	0	0	0	0
AAAAGAAGACTGATCTCGGGCG	23H-RNA	Y65A5A.26, Y65A5A.t3, Y7A9D.66, Y7A9D.t3		0.05	0	0.13	0	0	0	0.04	0	0.35	0	0		0	0.04	0	0	0.06	0		0	0.12	0	0	0.07	0	0.06	0		0	0.07	0	0.03	0	0
AAAACCACGAATCCTAACCACT	23H-RNA	tRNA		0.07	0	0	0	0.06	0	0	0	0	0.11	0		0	0	0	0	0	0		0	0.18	0	0	0	0	0	0		0	0	0	0	0	0.2
AAACCACGAATCCTAACCACTA	23H-RNA	tRNA		0.07	0	0.19	0.07	0	0	0	0	0	0	0		0	0	0	0	0	0		0	0	0	0	0.1	0	0	0		0	0.15	0.13	0	0	0
AAAGAATCCATTGTCCAGCTCC	23H-RNA	F55A4.9, rncs-1		0	0	0	0	0.06	0.07	0.06	0	0	0	0		0.07	0.06	0	0	0	0		0	0	0	0	0	0	0	0		0	0	0	0	0	0
AAATTCAAATTTAACTCCGTG	23H-RNA	Y69A2AR.16_hairpin		0	0	0	0	0	0	0	0	0	0	0		0	0	0	0	0	0		0	0	0	0	0.2	0	0	0		0	0.05	0.06	0	0.18	0
AACCGGACCCTGCCTCTTCATCA	23H-RNA	Y57G11C.1145_hairpin		0.14	0	0	0	0	0	0	0	0	0	0		0	0	0	0	0	0.07		0	0.09	0.13	0	0	0.12	0.18	0		0	0.1	0	0	0	0
AACGAGACCGCTGAAAAAGTTT	23H-RNA	PAL5A		0	0.06	0	0.14	0.11	0	0	0.11	0	0.1	0		0	0	0.11	0	0.05	0		0	0	0	0	0	0	0	0		0	0	0	0	0	0
AACGTGTCGCTTCGTCATCTGA	23H-RNA	F55A4.9, rncs-1		0.07	0	0.06	0	0	0	0	0	0	0	0		0	0	0	0	0	0.07		0	0	0	0	0.1	0.12	0	0		0	0	0.06	0	0	0
AACTGCCGCACGGTTTTGAAACT	23H-RNA	DNA-8-1		0.07	0	0	0	0	0	0	0	0	0	0		0	0	0	0	0	0		0	0	0	0	0	0	0	0.1		0	0	0	0	0	0.2
AAGAACAAGCCGTGGGCAAGCAC	23H-RNA	F39E9.7, F55A4.4		0	0.13	0	0	0	0	0	0	0	0	0		0	0	0	0	0	0		0	0	0	0	0	0	0	0		0	0	0	0	0	0
AAGTATGATTGATATTGGGAACA	23H-RNA	Y59H11AR.6		0	0.06	0	0	0	0	0	0	0	0	0		0	0	0	0	0	0		0	0	0	0	0	0	0	0		0.18	0	0	0.05	0	0
AATACCACGGGCGATGCCAAATC	23H-RNA	T05E12.8		0.07	0.13	0	0	0	0	0.06	0	0	0	0		0	0.06	0	0	0	0.07		0	0	0	0	0	0	0	0		0	0	0	0	0	0
AATTCTCTCGTAGAACGTGTCGCT	23H-RNA	F55A4.9, rncs-1		0	0	0	0	0	0	0	0	0	0	0		0	0	0	0	0	0		0	0	0	0	0	0	0	0		0.18	0	0.06	0.1	0	0
ACCACTTCCGCAGACGCTACAA	23H-RNA	Y37E3.30		0	0	0	0	0	0	0	0	0	0	0		0	0	0	0	0	0		0	0	0	0	0	0	0	0		0	0	0	0	0	0
ACCTCCATGTCGTAGGAATGCT	23H-RNA	C40A11.10, mir-8199		0.35	0.13	0	0	0	0	0	0	0	0	0		0	0	0	0	0.05	0		0	0	0	0	0	0	0	0		0	0	0	0	0	0
ACGATGGCTGCGGCGAGGATGAT	23H-RNA	Y57G11C.1145_hairpin		0.07	0	0	0	0	0	0	0	0	0	0		0	0	0	0	0	0		0	0	0	0	0	0	0	0		0	0	0	0.05	0	0.2
ACGTGTCGCTTCGTCATCTGA	23H-RNA	F55A4.9, rncs-1		0	0	0.06	0	0	0	0	0	0	0	0		0	0	0	0.14	0	0		0	0	0	0.25	0	0	0	0		0	0	0	0	0	0
ACTCCACCGTAATACAGTTTTCC	23H-RNA	other		0.07	0	0	0	0	0	0	0	0	0	0		0	0	0	0	0	0		0	0	0	0	0	0	0	0		0	0	0	0	0	0
ACTTCTTCCACGCCATCATCCAC	23H-RNA	Y57G11C.1145_hairpin		0.07	0	0	0	0	0	0	0	0	0	0		0	0	0	0	0	0		0	0	0	0	0	0	0	0		0	0	0	0	0	0
ACTTTTTCAGCGGTCTCGTTATG	23H-RNA	PAL5A		0	0	0	0	0.12	0	0	0.06	0	0	0		0	0	0.06	0	0	0		0	0	0	0	0	0	0	0		0	0	0	0	0	0
AGAGGTCCAAGTAAGATGATAGC	23H-RNA	F39E9.7		0.07	0.32	0	0	0	0	0	0	0	0	0		0	0	0	0	0	0		0	0.09	0.13	0	0	0	0	0		0	0	0	0	0	0
AGCATCGAGAAACTTGGACTTTT	23H-RNA	F55A4.9, rncs-1		0	0	0	0.14	0	0.14	0	0.06	0	0	0		0.14	0	0.06	0	0	0		0	0	0	0	0.1	0	0	0		0	0	0	0	0	0
AGCTAGCTTCACAACAATTGACC	23H-RNA	W03D2.15		0.14	0	0	0	0	0	0	0	0	0	0		0	0	0	0	0	0		0	0	0	0	0	0	0	0		0	0	0	0	0	0
AGTGGGCCGAGCGATTCGCTGA	23H-RNA	Y116A8C.27		0.07	0	0	0	0	0	0	0	0	0	0		0	0	0	0	0	0		0	0	0	0	0	0	0	0		0	0	0	0.05	0	0
ATATAGTGACTCTGGCCGTTCA	23H-RNA	ATATAGTGACTCTGGCCGTTCA_repeat		0.07	0	0.06	0	0.17	0	0	0	0	0.32	0		0	0	0	0	0.1	0.14		0	0.09	0.13	0	0.31	2.84	2.21	2.32		0	0.1	0.06	0.15	0	0
ATCCTCGCCGCAGCCATCGTCGT	23H-RNA	Y57G11C.1145_hairpin		0.21	0.06	0.06	0	0	0	0.12	0	0	0	0		0	0.12	0	0	0.1	0.07		0	0	0	0	0	0	0	0		0	0	0	0	0	0
ATCGTCGTCGTCATCCACTCCACC	23H-RNA	Y57G11C.1145_hairpin		0	0	0	0	0	0	0	0	0	0	0		0	0	0	0	0	0		0	0	0	0	0	0	0	0		0	0	0	0	0	0
ATGCGGTTGTTCCAAAGAATCC	23H-RNA	F55A4.9, rncs-1		0	0	0	0.36	0	0.07	0	0	0	0	0		0.07	0	0	0.14	0	0.07		0	0	0	0.75	0	0	0.09	0.2		0	0.05	0	0	0	0
ATGGCTGCGGCGAGGATGATG	23H-RNA	Y57G11C.1145_hairpin		0	0	0	0	0.06	0.21	0	0	0	0	0		0.21	0	0	0.14	0	0.14		0	0	0	0	0	0.12	0	0		0	0	0.06	0.1	0	0
ATGTGGATGATGGCGTGGAAGAA	23H-RNA	Y57G11C.1145_hairpin		0	0	0	0	0	0	0.06	0	0	0	0		0	0.06	0	0	0	0		0	0	0	0	0	0	0.09	0		0	0	0	0	0	0
ATGTTTCTGAGATGTCTTCAC	23H-RNA	F43E2.6		0	0.06	0.32	0.21	0.06	0.14	0	0	0	0	0.15		0.14	0	0	0.07	0	0		0	0	0	0.25	0	0	0.09	0.2		0	0.05	0	0.05	0	0
ATTCGGGAATTAGTTGTCGAC	23H-RNA	T05E12.8		0.63	0.64	0	0	0	0	0.06	0.12	0	0	0		0	0.06	0.12	0	0.05	0.21		0.14	0.09	0	0	0	0.12	0.09	0		0.18	0.05	0	0.1	0	0
CAAAACTGCTGTTTCCCCTGTG	23H-RNA	Y59H11AR.6		0	0.06	0	0	0	0	0	0	0	0	0		0	0	0	0	0	0		0	0	0	0	0	0	0	0		0	0	0	0	0	0
CAATCAAAGGATAGTCTCAACA	23H-RNA	F31C3.10, F31C3.9, rrn-3.1, rrn-3.56		1.05	1.02	0	0.5	0	0.07	0.12	0	0.35	0.11	0.58		0.07	0.12	0	0.07	0.19	0.07		0.28	0.27	0.25	0	0.1	0.35	0.64	0.81		0.18	0.05	0.13	0.05	0	0.2
CACTTACCAGCACACAGAGACG	23H-RNA	Y57G11C.51		0.07	0.13	0	0	0	0	0	0	0	0	0		0	0	0	0	0.05	0		0	0	0	0	0	0	0	0		0	0	0.06	0	0	0
CAGCGAATCGCTCTGCCCACTT	23H-RNA	Y116A8C.27		0.07	0	0	0	0	0	0	0	0	0	0		0	0	0	0	0	0.07		0	0	0	0	0	0	0	0		0	0	0	0	0	0
CATCATCCTCGCCGCAGCCAT	23H-RNA	Y57G11C.1145_hairpin		0	0	0	0	0	0	0	0	0	0	0		0	0	0	0	0	0		0	0	0	0	0	0	0	0		0	0	0	0	0	0
CATCGTCCGATTGGTGAAACCA	23H-RNA	Y17D7C.3		0	0.06	0	0	0	0	0	0	0	0	0		0	0	0	0	0	0		0	0	0	0	0	0	0	0		0	0	0	0	0	0
CATGTATTAAACGGTAAGGGCC	23H-RNA	mir-5592		0	0	0.64	1.07	0.87	0.84	0.89	0.46	0.52	0.11	0.15		0.84	0.89	0.46	0	0.1	0.14		1.66	1.42	1.77	2.5	5.6	3.19	2.94	5.05		2.83	2.26	2.25	2.1	2.03	1.82
CATTTGCCGATGTTTCTGAGA	23H-RNA	F43E2.6		0.56	0.38	0.38	0.21	0.29	0.07	0.36	0.58	0	0	0		0.07	0.36	0.58	0.07	0.05	0.14		0.41	0.53	0.13	0	0.1	0.35	0.64	0.71		0	0.35	0.06	0.15	0.37	0.2
CCAAACTGGATTGACGAGCATCG	23H-RNA	F55A4.9, rncs-1		0	0	0	0	0	0	0	0.17	0	0	0		0	0	0.17	0.07	0.14	0		0	0	0.13	0.25	0.2	0	0.09	0		0	0.05	0	0	0	0
CCACGGCGGCCGACAATTTCCG	23H-RNA	Unknown_hairpin_RE2		0	0.06	0	0	0	0	0	0	0	0	0		0	0	0	0	0	0		0	0	0	0	0	0.12	0	0		0	0	0	0	0	0
CCATTTGCCGATGTTTCTGAGA	23H-RNA	F43E2.6		0	0.19	0	0	0.35	0	0.12	0	0	0	0		0	0.12	0	0	0.1	0.07		0	0.09	0.13	0	0	0	0.09	0.2		0	0.05	0.06	0	0	0
CCCGCGGGTGATGACAGAAACGG	23H-RNA	dnj-27_element		0.07	0	0	0	0	0	0	0	0	0	0		0	0	0	0	0.05	0		0	0	0	0	0	0	0	0		0	0	0	0.05	0	0
CCCTTACCGTTTAATACATGTT	23H-RNA	mir-5592		0	0	0	0	0	0	0	0	0	0	0		0	0	0	0	0	0		0	0	0	0.25	0	0	0	0		0	0	0	0	0	0
CCCTTTGTACACACCGCCCGTC	23H-RNA	F31C3.7, F31C3.8, rrn-1.1, rrn-1.2		0	0.06	0	0	0.17	0	0	0	0	0.21	0		0	0	0	0	0	0		0.14	0	0	0	0.2	0.24	0.18	0		0	0.05	0	0	0	0
CGATGCTCGTCGATCCAGTTTGGC	23H-RNA	F55A4.9, rncs-1		0.07	0.19	0.13	0	0	0.07	0	0.06	0	0	0		0.07	0	0.06	0.14	0.05	0		0	0	0	0.25	0.2	0	0.09	0		0	0	0	0	0.18	0
CGATGGCTGCGGCGAGGATGA	23H-RNA	Y57G11C.1145_hairpin		0.07	0	0	0	0	0	0	0	0	0	0		0	0	0	0.07	0.05	0		0	0	0	0	0	0	0	0		0	0	0	0	0	0
CGATGGCTGCGGCGAGGATGATGT	23H-RNA	Y57G11C.1145_hairpin		0.14	0	0	0	0	0	0	0	0	0	0		0	0	0	0	0.1	0.07		0	0	0	0	0.1	0	0	0		0	0	0.06	0	0	0
CGGCGCGCGGAACCCATGAGATG	23H-RNA	PALTA3		0	0	0	0	0	0	0	0	0	0	0		0	0	0	0	0	0		0	0	0	0	0	0	0	0		0	0	0	0	0	0
CTAATAACCGGTATACCGAATT	23H-RNA	E01G4.7		0	0	0	0	0	0	0	0	0	0	0		0	0	0	0	0	0		0	0	0	0	0	0	0	0		0	0	0	0	0	0
CTACAACGTGGAGCTAAGACACCC	23H-RNA	F55C9.3		0.28	0	0	0	0	0	0	0	0	0	0		0	0	0	0	0	0		0	0	0	0	0	0.12	0	0		0	0	0	0	0	0
CTCGGCATTCAGAGGCAACTTCC	23H-RNA	Unknown_RE3		0	0	0.13	0	0.06	0	0	0	0	0	0		0	0	0	0	0.19	0		0	0	0	0	0.1	0	0.09	0		0	0	0	0.05	0	0
CTCTTACTGTAGTTTTCGCTA	23H-RNA	PALTA4		0.07	0	0.26	0	0	0.14	0	0	0	0	0		0.14	0	0	0	0	0		0.14	0	0	0	0.1	0	0.18	0		0	0.05	0.06	0	0	0
CTGAGGATTTTGAGTGAGGCTCA	23H-RNA	M4.2, puf-4		0	0	0	0	0	0	0	0	0	0	0		0	0	0	0	0	0		0	0	0	0	0	0	0	0		0	0	0.06	0	0	0
CTGTTCTGCTCTCTCTTTCAGCT	23H-RNA	F55A4.9, rncs-1		0	0	0	0.14	0	0	0	0.12	0	0	0		0	0	0.12	0	0	0		0	0	0	0	0.1	0	0	0		0	0	0	0	0	0
CTGTTCTGCTCTCTCTTTCAGCTC	23H-RNA	F55A4.9, rncs-1		0.14	0.06	0.32	0	0	0	0	0.06	0	0	0		0	0	0.06	0	0	0		0	0	0	0	0	0	0	0		0	0	0	0	0	0
CTTCAAGTTCTATTGCCGGATAT	23H-RNA	F39E9.10		0.63	0.38	0.96	0	0.12	0	0	0	0	0	0		0	0	0	0	0.05	0		0	0.09	0	0	0	0.24	0.37	0.1		0.18	0.05	0.26	0	0	0
CTTCCTTGACGACATATGGCCC	23H-RNA	other		0	0.13	0	0	0	0.07	0	0	0	0	0		0.07	0	0	0	0	0		0	0	0	0	0	0	0	0		0	0	0	0	0	0
CTTCTTCCACGCCATCATCCACA	23H-RNA	Y57G11C.1145_hairpin		0	0	0	0	0	0	0	0	0	0	0		0	0	0	0	0	0		0	0	0	0	0	0	0	0.1		0	0	0	0	0	0
CTTTTTCAGCGGTCTCGTTATGA	23H-RNA	PAL5A		0.07	0.13	0	0	0.06	0	0	0	0	0.11	0		0	0	0	0	0	0		0	0	0	0	0	0	0.09	0.2		0	0	0	0	0	0
CTTTTTTCGTTCTATGTGAGT	23H-RNA	F52D2.6		0.07	0	0	0	0	0	0	0	0	0	0		0	0	0	0	0	0		0	0	0	0	0	0	0	0		0	0	0	0	0	0
GAAGACACTTTCCAATTACCC	23H-RNA	GAAGACACTTTCCAATTACCC_Repeat, Y116A8C.48		0.21	0	0.45	0.14	0.06	0.21	0.06	0.17	0.17	0.21	0		0.21	0.06	0.17	0	0.24	0.14		0.28	0.09	0	0	0	0.47	0.46	0		0	0.25	0.06	0.15	0	0
GACGGGCGGTGTGTACAAAGGG	23H-RNA	F31C3.7, F31C3.8, rrn-1.1, rrn-1.2		0.07	0	0.32	0	0.29	0.07	0.18	0.12	0.17	0.11	0		0.07	0.18	0.12	0.14	0	0		0.14	0	0	0.25	0	0.35	0	0.1		0	0	0	0	0	0
GATGGTCGACAACCGACGAACA	23H-RNA	F19G12.10		0	0	0	0	0	0	0	0	0	0	0		0	0	0	0	0	0		0	0	0	0	0	0	0	0		0	0	0	0	0	0
GCCCTTACCGTTTAATACATG	23H-RNA	mir-5592		0	0	0.45	0.07	0	0	0.06	0.06	0	0	0		0	0.06	0.06	0.07	0.1	0.07		0	0.18	0.13	0	0.51	0.47	0.18	0.2		0.35	0.3	0.51	0.2	0.55	0.2
GGGATAAGAGCTCGTCCGATGGCG	23H-RNA	T05E12.8		0	0	0	0	0	0	0	0	0	0	0		0	0	0	0	0	0		0	0	0	0	0	0	0	0		0	0	0	0	0	0
GGTGAGACATGGTATCGAGATATG	23H-RNA	Y37E11B.2		0.07	0.19	0	0.14	0	0.07	0	0.06	0	0	0		0.07	0	0.06	0	0.05	0		0	0	0	0	0	0	0.09	0		0.18	0.05	0	0.05	0.18	0
GTATTAAACGGTAAGGGCCGGCT	23H-RNA	mir-5592		0	0	0.83	0.71	1.16	0.42	0.47	0.58	0	0.53	0.15		0.42	0.47	0.58	0.63	0.57	0.83		1.24	0.89	0.63	3.25	2.24	1.42	1.19	1.21		3.01	1.66	1.86	1.3	0.74	1.82
GTGGAGTGGATGACGACGACGA	23H-RNA	Y57G11C.1145_hairpin		0.21	0.32	0.45	0.85	0.87	1.97	2.13	1.51	2.44	3.06	0.87		1.97	2.13	1.51	0.14	0.24	0.34		0.97	1.87	2.02	0	0	2.6	3.22	2.73		2.48	2.42	2.05	2	2.4	1.42
GTTTGGCCAAGCGGACTGGAGC	23H-RNA	F55A4.9, rncs-1		0	0	0	0	0	0	0	0	0	0	0		0	0	0	0	0	0		0	0	0	0	0	0	0	0		0	0.05	0	0	0	0
GTTTGGCCAAGCGGACTGGAGCA	23H-RNA	F55A4.9, rncs-1		0	0	0	0	0	0	0	0	0	0	0		0	0	0	0	0	0		0	0	0	0	0.1	0	0	0		0	0	0	0	0	0
TAAAACTGCGTGGCGTGTACTGC	23H-RNA	PALTA3		0.14	0	0.19	0	0	0	0	0	0	0.11	0		0	0	0	0.14	0.05	0		0.41	0	0	0	0.1	0	0.18	0		0.18	0.05	0	0.1	0	0
TAAATCTACTTAAATCAACGAAT	23H-RNA	mek-2, Y54E10BL.6, Y71F9AL.1		0	0	0	0	0	0	0	0	0	0	0		0	0	0	0	0	0		0.14	0	0	0	0	0	0.09	0		0	0	0	0	0	0
TACAACGTGCAACTAAGACACCC	23H-RNA	Y37E3.30		0.21	0	0	0	0	0	0	0	0	0	0		0	0	0	0	0	0		0	0	0	0	0	0	0	0.1		0	0	0	0	0	0
TACGGGAAAAGCAGAGAGGCCAC	23H-RNA	F39E9.7		0.07	0.06	0	0	0	0	0	0	0	0	0		0	0	0	0	0	0		0	0	0	0	0	0	0	0		0	0	0	0	0	0
TAGAAGACCACTTCCGCAGACGC	23H-RNA	Y37E3.30		0	0.06	0	0	0	0	0	0	0	0	0		0	0	0	0	0	0		0	0	0	0	0	0	0	0		0	0	0	0	0	0
TAGTTTTCGGGGTACGGTATCT	23H-RNA	ChrIII_hairpin2		0.14	0.19	0	0.07	0	0	0	0	0	0	0		0	0	0	0	0	0.07		0	0	0	0	0	0	0	0		0.35	0.1	0	0	0.37	0
TATCTCGATACCATGTCTCACCCA	23H-RNA	Y37E11B.2		0.07	0	0	0	0	0	0	0	0	0	0		0	0	0	0	0	0		0	0	0	0	0	0	0	0		0	0	0	0.05	0	0
TATTAAACGGTAAGGGCCGGC	23H-RNA	mir-5592		0.07	0.06	3.91	4.34	3.37	4.08	3.02	4.3	1.57	1.16	1.02		4.08	3.02	4.3	4.16	4.09	5.45		8.69	5.6	3.91	11.25	9.37	7.44	8.27	8.69		1.24	1.66	2.7	1.85	0.74	1.21
TCAAAGGATCCGGTGAGGCTA	23H-RNA	W04B5.8		0	0.06	0	0	0	0	0	0	0	0	0		0	0	0	0	0	0		0	0	0	0	0	0	0	0		0	0.05	0	0	0	0
TCAAAGGATCCGGTGAGGCTAA	23H-RNA	W04B5.8		0.07	0	0	0	0	0	0	0	0	0	0		0	0	0	0	0	0		0	0	0	0	0	0	0	0		0	0	0	0	0	0
TCAATAAAAACAATGGACAACT	23H-RNA	Y59H11AR.6		0	0	0	0	0	0	0	0	0	0	0		0	0	0	0	0	0		0	0	0	0	0	0	0	0		0	0	0	0	0	0
TCAATTGTTGTGAAGCTAGCTCC	23H-RNA	W03D2.15		0.14	0	0	0	0	0	0	0	0	0	0		0	0	0	0	0	0		0	0	0	0	0	0	0	0		0	0	0	0	0	0
TCACGGAGTTAAATTTGAATT	23H-RNA	Y69A2AR.16_hairpin		0	0	0	0	0	0	0	0	0	0	0		0	0	0	0	0	0		0	0	0	0	0.1	0	0	0		0	0	0.06	0.1	0	0
TCACGGAGTTAAATTTGAATTTT	23H-RNA	Y69A2AR.16_hairpin		0	0	0	0	0	0	0	0	0	0	0		0	0	0	0	0.05	0.07		0	0	0	0	0.2	0	0	0		0	0.05	0	0	0	0
TCAGGCCGCCGACATCTCATG	23H-RNA	PALTA3		0	0	0	0	0	0	0	0	0	0	0		0	0	0	0	0	0		0.14	0	0	0	0	0	0	0		0	0	0	0	0	0
TCAGGCCGCCGACATCTCATGGG	23H-RNA	PALTA3		0	0.06	0	0	0	0	0	0	0.17	0	0		0	0	0	0	0	0		0	0	0	0	0	0	0.09	0		0	0	0	0	0	0
TCAGGCCGCCGACATCTCATGGGT	23H-RNA	PALTA3		0	0	0	0	0.06	0	0	0.06	0	0	0		0	0	0.06	0	0	0		0	0	0.13	0	0	0	0	0		0	0	0	0	0	0
TCATCCTCGCCGCAGCCATCGTCG	23H-RNA	Y57G11C.1145_hairpin		0.07	0	0	0	0	0	0	0	0	0	0		0	0	0	0	0	0		0	0	0	0	0	0	0	0		0	0	0	0	0	0
TCCCCGTCAACATAAACTTTTT	23H-RNA	TC5		0.21	0	0	0.07	0	0	0.12	0	0	0.11	0		0	0.12	0	0.21	0	0		0.14	0.36	0	2.5	4.07	0.24	0.37	0.1		1.06	0.25	0.39	0.5	0.55	0.61
TCCCGCATTTTTTGTAGATCAAA	23H-RNA	CELE14B		0.07	0.19	0	0	0	0	0	0.06	0	0	0		0	0	0.06	0.14	0	0.14		0	0.09	0	0.25	0	0.23	0	0.1		0.17	0.05	0	0	0	0
TCCGATCTGGCAAGTTAAGCAA	23H-RNA	rrn-4_RE		0.21	0	0.19	0	0.17	0.14	0.18	0.23	0	0	0		0.14	0.18	0.23	0.14	0.14	0.07		0.41	0	0.13	0.25	0.1	0	0.18	0.3		0	0.1	0	0.05	0	0.2
TCCTCATCTCTGATCTTTTCCAA	23H-RNA	F55A4.9, rncs-1		0	0	0	0.21	0.17	0	0	0	0	0	0		0	0	0	0	0	0		0	0	0	0	0.2	0	0	0		0	0	0	0	0	0
TCCTGATCGCTCATCTAAACAACC	23H-RNA	F31C3.9, rrn-3.1		0	0.06	0	0	0.12	0	0	0	0	0	0		0	0	0	0	0	0		0.28	0.44	0.13	0.5	0.1	0.35	0.09	0.5		0	0	0.06	0	0	0
TCGACAACTAATTCCCGAATCT	23H-RNA	T05E12.8		0	0	0	0	0	0	0	0	0	0	0		0	0	0	0	0	0		0	0	0	0	0	0	0	0		0	0	0	0	0	0
TCGGAAATTGTCGGCCGCCGTG	23H-RNA	Unknown_hairpin_RE2		0	0	0	0	0	0	0	0	0	0	0		0	0	0	0.07	0	0		0	0	0	0	0	0	0	0		0	0	0	0	0	0
TCGGCTCTTCGAGCGCGTCTTCTT	23H-RNA	ChrIII_hairpin1		0.03	0.13	0	0	0	0	0	0	0	0	0		0	0	0	0.04	0.05	0.03		0	0	0.06	0.13	0	0	0	0.05		0	0	0	0.03	0	0
TCGGGGACCAACCAATATCAGGC	23H-RNA	PALTA3		0.14	0.06	0	0	0	0	0	0	0	0	0		0	0	0	0	0	0		0	0.09	0.13	0	0	0	0.09	0		0	0	0	0	0	0
TCTCAGAAACATCGGCAAATGGC	23H-RNA	F43E2.6		0	0.06	0	0	0	0	0	0	0	0	0		0	0	0	0	0	0		0	0	0	0	0	0	0	0		0	0	0	0	0	0
TCTCGTAGAACGTGTCGCTTCG	23H-RNA	F55A4.9, rncs-1		0.07	0	0.13	0.07	0.35	0	0.06	0.06	0	0	0		0	0.06	0.06	0	0.1	0		0	0	0.13	0.25	0.1	0	0	0		0	0.05	0.06	0	0	0
TCTCTCGTAGAACGTGTCGCTTC	23H-RNA	F55A4.9, rncs-1		0	0.06	0.06	0	0	0.07	0	0	0	0	0		0.07	0	0	0.07	0	0		0	0.09	0	0	0	0	0	0		0	0	0	0	0	0
TCTCTCTTCTCGGCTCTTCGAGC	23H-RNA	ChrIII_hairpin1		0.14	0.19	0	0	0	0	0	0.06	0	0	0		0	0	0.06	0.21	0.14	0		0	0	0	0	0	0	0	0		0	0	0	0	0.18	0
TCTGCGGAAGTGGTCTTCTACC	23H-RNA	Y37E3.30		0.14	0.19	0	0	0	0	0	0	0	0	0		0	0	0	0.21	0	0		0	0	0	0	0	0	0	0		0	0	0	0	0	0
TCTTCCTGATGTTCTGATCCTTC	23H-RNA	Unknown_IR1		0	0	0	0	0	0	0.06	0	0	0	0		0	0.06	0	0	0.05	0		0	0	0	0	0	0	0	0		0	0	0	0	0	0
TCTTCTCGGCTCTTCGAGCGCGT	23H-RNA	ChrIII_hairpin1		0.07	0.06	0	0	0	0	0	0	0	0	0		0	0	0	0.07	0.05	0.07		0	0	0	0	0	0.12	0	0		0	0	0	0	0	0
TGAAAGGATCGGGACGATTAGG	23H-RNA	ChrX_intergenic1		0	0.06	0	0	0	0	0	0.06	0	0	0		0	0	0.06	0	0	0		0	0	0	0	0	0	0.09	0		0	0	0	0	0	0
TGAAGAGGCAGGGTCCGGTTG	23H-RNA	Y57G11C.1145_hairpin		0.14	0.13	0	0	0.06	0	0.06	0	0	0	0		0	0.06	0	0.21	0.05	0		0	0	0	0	0	0	0	0		0.35	0.1	0.06	0.05	0	0
TGAGGTGTTGGTGCTGATGGCA	23H-RNA	C36A4.14		0.07	0	0	0	0	0	0	0	0	0	0		0	0	0	0.07	0	0.07		0	0	0	0	0	0	0	0		0	0	0	0	0	0
TGATCTACAAAAAATGCGGGAAT	23H-RNA	CELE14B		0	0	0	0	0.23	0	0	0	0	0	0		0	0	0	0	0	0		0	0	0	0	0.1	0	0	0		0	0.05	0	0	0	0
TGATGGCGTGGAAGAAGTTGATG	23H-RNA	Y57G11C.1145_hairpin		0	0	0.13	0	0	0	0	0	0	0	0		0	0	0	0	0	0		0	0	0	0	0	0	0	0		0	0	0	0	0	0
TGATTACGTCCCTGCCCTTTGT	23H-RNA	F31C3.7, F31C3.8, rrn-1.1, rrn-1.2		0	0.06	0.13	0	0.17	0	0	0	0.17	0.11	0.29		0	0	0	0	0.05	0		0.14	0	0	0	0.31	0.12	0.18	0		0.18	0.05	0.06	0.05	0	0
TGCAACTAAGACACCCCGAACT	23H-RNA	Y37E3.30		0	0.06	0	0	0	0	0	0	0	0	0		0	0	0	0	0	0		0	0	0	0	0	0	0	0		0	0	0	0	0	0
TGGACTTTTTCGCTGGTTTGGTG	23H-RNA	F55A4.9, rncs-1		0	0.13	0.13	0	0.06	0	0	0.06	0	0	0		0	0	0.06	0	0	0		0	0	0	0	0.1	0	0	0		0	0	0	0	0	0
TGGCGTGTACTGCAGAAAACCT	23H-RNA	PALTA3		0.07	0.06	0	0	0	0	0.06	0.06	0	0.1	0		0	0.06	0.06	0.07	0	0.13		0	0	0	0	0.1	0	0.09	0.1		0	0.05	0	0	0	0
TGGCTGCGGCGAGGATGATGTG	23H-RNA	Y57G11C.1145_hairpin		0	0	0	0	0	0	0	0	0	0	0		0	0	0	0.07	0	0		0	0	0	0	0	0	0	0		0	0	0	0.05	0	0
TGGTCTTTGAGTTTCCGATTTCG	23H-RNA	Y17D7C.3		0.07	0.26	0	0	0	0	0	0	0	0	0		0	0	0	0	0	0		0	0	0	0	0	0	0	0		0	0	0	0	0	0
TGTAACAACTCACCTGCCGAAT	23H-RNA	F31C3.9, rrn-3.1		0	0.19	0.26	0	0	0.14	0	0	0.35	0.11	0.44		0.14	0	0	0	0	0.07		0.14	0.62	0.13	0.5	0.2	0.24	0.46	0.4		0.35	0.15	0	0.05	0	0.4
TGTAATTCTGCAGCCACTTCCGA	23H-RNA	W03D2.15		0	0.06	0	0	0	0	0	0	0	0	0		0	0	0	0	0	0		0	0	0	0	0	0	0	0		0	0	0	0	0	0
TGTATTAAACGGTAAGGGCCGG	23H-RNA	mir-5592		0.07	0	3.2	3.13	2.55	1.69	0.95	2.21	1.22	0.32	0.15		1.69	0.95	2.21	2.61	2.28	2.41		3.59	2.22	2.9	6.5	7.74	4.37	3.77	3.43		1.06	2.01	1.48	1.35	0.18	0.81
TGTGAAGACATCTCAGAAACAT	23H-RNA	F43E2.6		0	0	0	0	0	0	0	0	0	0	0		0	0	0	0	0	0		0	0	0	0	0	0	0	0		0	0	0	0	0	0
TTAAACATAGCGGCGCGCGGA	23H-RNA	PALTA3		0	0.06	0	0	0.06	0	0	0	0	0	0		0	0	0	0	0	0.07		0	0	0.12	0.25	0	0	0	0		0	0.05	0.06	0	0.18	0
TTCATTCTGCCCTCGCACACACC	23H-RNA	T25G12.8		0.14	0	0	0	0	0	0	0	0	0	0		0	0	0	0	0	0		0	0	0	0	0	0	0	0		0	0	0	0.05	0	0
TTCCTCATCTCTGATCTTTTCC	23H-RNA	F55A4.9, rncs-1		0	0.06	0.13	0.21	0.12	0	0	0	0	0	0		0	0	0	0	0	0		0	0	0	0	0.2	0	0	0.3		0	0.05	0	0.05	0	0
TTCTACAGAAGGGACGCCGGAAA	23H-RNA	other		0	0	0	0	0	0	0	0	0	0	0		0	0	0	0	0	0.14		0	0	0	0	0	0	0	0		0	0	0	0	0	0
TTCTCTCGTAGAACGTGTCGCTT	23H-RNA	F55A4.9, rncs-1		0.21	0.64	0.19	0	0.23	0.07	0.24	0.23	0	0	0		0.07	0.24	0.23	0.28	0.05	0.07		0.28	0	0	0	0.31	0	0.09	0.1		0	0	0	0.05	0.18	0
TTCTTACTGTAGTCTTCGCTAAG	23H-RNA	fbxa-16, other, Y73B3A.14		0	0	0	0	0.12	0	0	0	0	0	0		0	0	0	0	0.05	0		0.14	0.09	0	0	0	0	0	0		0	0	0	0	0	0
TTGATTGTGTCGGAAAAAGAAA	23H-RNA	K02E2.6		0.07	0.13	0	0	0.17	0	0	0	0	0	0		0	0	0	0.07	0	0		0	0.09	0	0.25	0	0	0	0		0.18	0.1	0	0.05	0	0
TTGCTTTCCTCATCTCTGATCTTT	23H-RNA	F55A4.9, rncs-1		0.21	0.13	0	0.14	0	0	0	0.06	0	0	0		0	0	0.06	0.14	0.29	0.48		0	0	0.13	0.5	0.31	0	0	0		0	0.05	0.13	0.05	0	0
TTGCTTTTTGATCCTTCGATGT	23H-RNA	F31C3.10, F31C3.9, rrn-3.1, rrn-3.56		0	0.06	0	0	0.12	0.07	0	0.12	0	0	0.29		0.07	0	0.12	0	0	0		0	0	0	0	0	0.12	0.09	0.1		0.18	0.1	0.06	0.2	0	0.61
TTGGACTTTTTCGCTGGTTTGGT	23H-RNA	F55A4.9, rncs-1		0	0	0	0	0.06	0	0.06	0	0	0	0		0	0.06	0	0	0.05	0		0	0.09	0	0	0.1	0	0	0		0	0.05	0.06	0.05	0	0
TTGGTTGGTCCCCGAATTTTGCC	23H-RNA	PALTA3		0.07	0.06	0.06	0	0	0.07	0	0.12	0	0.11	0		0.07	0	0.12	0	0	0.07		0	0	0	0	0	0.12	0.09	0.1		0	0.05	0	0	0	0
TTTCAACACGGCGGGAGGAAAGC	23H-RNA	Y37E3.30		0	0	0.13	0	0	0	0	0	0	0	0		0	0	0	0	0	0		0	0	0	0	0	0	0	0		0	0	0	0	0	0
TTTCGAAACCGTGCGGCAGTTG	23H-RNA	DNA-8-1		0	0	0.32	0	0	0	0	0	0	0	0		0	0	0	0	0	0		0	0	0	0	0	0	0	0		0	0.05	0	0	0	0
TTTCGTCCATACATTGAGGGAGCC	23H-RNA	F39E9.10		0.21	0.19	0	0	0	0	0	0	0	0	0		0	0	0	0	0	0		0	0	0	0	0	0	0	0		0	0	0	0	0	0
TTTCTGAGATGTCTTCACAAT	23H-RNA	F43E2.6		0.07	0.06	0.06	0.14	0	0	0.06	0	0	0	0		0	0.06	0	0	0.1	0		0	0.09	0	0	0	0	0	0		0	0	0	0	0	0
TTTCTGTCATCACCCGCGGGGC	23H-RNA	dnj-27_element		0	0	0	0	0	0	0.06	0	0	0	0		0	0.06	0	0	0	0		0	0	0	0	0	0	0.09	0		0	0	0	0	0	0
TTTCTGTCATCACCCGCGGGGCC	23H-RNA	dnj-27_element		0	0	0	0	0	0	0	0	0	0	0		0	0	0	0	0	0		0	0	0	0	0	0	0	0		0	0	0	0	0	0
TTTGGCCAAGCGGACTGGAGCA	23H-RNA	F55A4.9, rncs-1		0	0	0	0	0.06	0	0	0	0	0	0		0	0	0	0.07	0	0.07		0	0.09	0	0	0	0	0	0.1		0	0	0.06	0	0	0
TTTGGCCAAGCGGACTGGAGCACA	23H-RNA	F55A4.9, rncs-1		0	0.13	0	0.07	0	0	0	0	0	0	0		0	0	0	0	0	0.07		0	0	0	0	0.2	0	0	0		0	0	0	0.05	0	0
AAATTGTCGGCCGCCGTGGAA	23H-RNA	Unknown_hairpin_RE2		0	0	0	0	0	0	0	0	0	0	0		0	0	0	0.06	0.04	0		0	0	0	0	0	0	0	0		0	0	0.06	0	0	0
AGAGTGACAGACATCCGGGACCC	23H-RNA	Unknown_RE2		0	0	0	0	0	0	0	0	0	0	0		0	0	0	0	0	0		0	0	0	0	0	0	0	0		0	0	0	0	0	0
ATAGCGGCGCGCGGAACCCATG	23H-RNA	PALTA3		0	0.06	0	0	0	0.07	0	0	0.17	0	0.14		0.07	0	0	0	0	0		0	0	0	0	0	0	0	0		0	0	0	0	0	0
ATCGACACAAGCGCTACAGTAG	23H-RNA	CELE1		0	0	0	0	0	0	0	0	0	0	0		0	0	0	0	0	0		0	0	0	0	0	0	0	0		0	0	0	0	0	0
ATTTAAAGCCGATAGGTAACC	23H-RNA	PALTTAA3		0	0.06	0	0	0	0	0.11	0	0	0	0		0	0.11	0	0	0	0		0	0	0	0	0	0	0	0		0.16	0	0	0	0	0
CCCGCATTTTTTGTAGATCAGA	23H-RNA	CELE14B		0	0	0	0	0	0	0	0	0	0	0		0	0	0	0	0	0		0	0	0	0	0	0	0	0		0	0	0.06	0	0	0
CGACCGGACGCCGATTTGTACAG	23H-RNA	Unknown_hairpin_RE2		0	0	0	0	0	0	0	0	0	0	0		0	0	0	0	0	0		0	0	0	0	0	0	0	0		0	0	0	0	0	0
CGCGCCGCTATGTTTAACTCGC	23H-RNA	PALTA3		0	0.18	0.12	0	0	0	0	0	0	0	0		0	0	0	0	0	0		0	0.17	0	0	0	0	0	0.1		0	0	0	0	0	0
TAAACGCAGCGGCGCGCGGAACC	23H-RNA	PALTA3		0	0	0	0	0	0	0	0	0	0	0		0	0	0	0	0	0		0	0	0	0	0	0	0	0		0	0	0	0	0	0
TACGGTTTGATCTACAAAAAATGC	23H-RNA	CELE14B		0.12	0	0.29	0	0.1	0	0	0	0	0	0		0	0	0	0.06	0	0		0	0	0.11	0.22	0.09	0	0	0.09		0.16	0	0.11	0	0	0.18
TACGTCACAACTGTATTAAAAT	23H-RNA	TC8		0	0	0	0.07	0	0	0	0.06	0	0	0		0	0	0.06	0	0	0		0	0.09	0	0	0	0	0	0		0	0.05	0	0	0	0
TATCTACACTCTCTGTACCGG	23H-RNA	Unknown_RE2		0	0.06	0.06	0	0	0.07	0.12	0.17	0	0.21	0		0.07	0.12	0.17	0.07	0.09	0		0.13	0.09	0	0	0	0	0	0		0	0.05	0	0	0	0
TTCCACGGCGGCCGACAATTTCC	23H-RNA	Unknown_hairpin_RE2		0	0.12	0.12	0	0	0	0	0	0	0	0		0	0	0	0	0	0		0	0	0	0	0	0	0	0		0	0	0	0	0	0
TTCTTACTGTAGTTTTCGCTAAG	23H-RNA	PALTA4		0.07	0.24	0	0	0	0	0	0	0	0	0		0	0	0	0.07	0	0		0	0	0	0	0.1	0.11	0	0.1		0	0	0	0.05	0	0
TTTTTCAGCGGTCTCGTTATGA	23H-RNA	PAL5A		0.13	0	0	0.21	0.11	0.14	0	0	0.17	0	0.14		0.14	0	0	0	0.05	0		0	0.26	0	0	0.1	0.11	0	0.1		0	0	0	0	0	0
CCCGCGGGTGATGACAGAAAC	23H-RNA	dnj-27_element		0	0.05	0	0	0	0	0	0	0	0	0		0	0	0	0.06	0.04	0		0	0	0	0	0	0	0	0		0	0	0	0	0	0
CCGCATTTTTTGTAGATCAAACC	23H-RNA	CELE14B		0	0	0	0	0.05	0	0	0	0	0	0		0	0	0	0	0	0		0	0	0	0	0	0	0	0		0	0	0	0.04	0	0
CGCATTTTTTGTAGATCAAACCG	23H-RNA	CELE14B		0.06	0	0	0	0.1	0	0	0	0	0	0		0	0	0	0	0	0		0	0.08	0.11	0	0	0	0	0		0	0	0	0.04	0	0
TACACGAGCTGCGTAAATCGAC	23H-RNA	other		0	0	0	0	0	0	0	0	0	0	0		0	0	0	0	0	0		0	0	0	0	0	0	0	0		0	0.04	0	0	0	0
TTCACGGCGGCCGACAATTTCC	23H-RNA	other		0.12	0.11	0	0	0.05	0	0	0	0	0	0		0	0	0	0	0.04	0		0	0	0	0	0	0	0	0		0	0	0	0.04	0	0
TTCCCGCATTTTTTGTAGATC	23H-RNA	CELE14B		0	0.2	0.1	0	0.04	0	0	0	0	0	0		0	0	0	0.11	0.04	0		0	0.07	0.1	0	0.08	0.09	0	0		0.14	0.04	0	0	0	0
AAGGATCGATTCATAAATTTTGA	23H-RNA	AAGGATCGATTCATAAATTTTGA_Repeat		0.05	0.04	0	0	0	0.05	0	0	0	0	0		0.05	0	0	0	0	0		0.1	0.06	0.26	0	0.07	0	0.06	0		0.12	0.1	0	0	0.13	0
CGGAAATTCGTTGATTGAGACA	23H-RNA	other		0.25	0.05	0	0	0	0	0	0	0	0	0		0	0	0	0	0	0		0	0	0	0	0	0	0	0		0	0	0	0	0	0
TATCGCACTCTTTGCCCTTCCGC	23H-RNA	jmjc-1, T28F2.4		0.07	0.06	0	0	0	0	0	0.02	0	0	0		0	0	0.02	0	0	0		0	0	0	0	0	0	0.03	0		0	0	0	0	0.06	0
TCCCGCATTTTTTGTAGATCAA	23H-RNA	CELE14B		0.05	0.09	0	0	0	0	0.09	0	0	0	0		0	0.09	0	0.05	0.03	0		0	0.06	0	0	0	0	0.07	0.07		0	0	0	0.04	0	0
TTAAACGGTAAGGGCCGGCTGG	23H-RNA	mir-5592		0	0.04	5.25	4.89	5.11	5.86	3.87	4.64	2.32	1.76	0.78		5.86	3.87	4.64	4.98	4.76	4.5		6.34	3.32	2.44	7.5	7.94	5.83	4.78	5.52		2.12	3.05	3.68	2.87	2.83	2.7
TCTTACTGTAGTTTTCGCTAAGA	23H-RNA	PALTA4		0	0	0	0	0	0	0	0	0	0	0		0	0	0	0	0	0		0	0	0	0.14	0	0	0	0.06		0	0	0	0	0	0
ACAACCCTGAACCAGACGTACCA	23H-RNA	F31C3.11, rrn-2.1		0	0.03	0	0.04	0.03	0.04	0.06	0	0.17	0.16	0.15		0.04	0.06	0	0.04	0.05	0.03		0	0	0	0	0	0	0	0		0	0	0	0	0	0
ATTGGCCTACCGAACGAAAAACC	23H-RNA	Y116F11A.1		0.03	0.06	0	0	0	0	0	0	0	0	0		0	0	0	0	0	0		0	0	0	0	0	0	0	0		0	0	0	0	0	0
TCCCGCAATTCTCGTAGATCAAA	23H-RNA	other		0	0	0	0	0	0	0	0	0	0	0		0	0	0	0	0	0		0	0	0	0	0	0	0	0		0	0	0.03	0	0	0
TGGAGTTGAATTGGAACGAGATC	23H-RNA	T05E12.10		0.02	0	0	0	0	0	0	0.01	0	0	0		0	0	0.01	0	0	0		0	0	0	0	0	0	0	0		0	0	0	0	0	0
AATGACTACTGTAGCGCTTGTG	23H-RNA	CELE1		0	0	0	0	0	0	0	0	0	0	0		0	0	0	0	0	0		0.01	0.01	0.01	0	0	0.01	0	0		0.01	0	0	0	0	0
AAAAAAGAACTGAAGAGAGTG	23H-RNA	C05E7.1, C05E7.t3		0	0	0.02	0	0	0	0	0	0	0	0		0	0	0	0	0	0		0	0	0	0	0	0.01	0	0		0	0	0.01	0	0	0
AAAAAATATGGATAAGATGATG	23H-RNA	F55A4.9, rncs-1		0	0	0	0	0	0	0	0	0	0	0		0	0	0	0	0	0		0	0	0	0	0	0	0	0		0	0	0	0	0	0
AAAAATGTAGAAGCTGTGGGCA	23H-RNA	E01G4.5		0	0.06	0	0	0	0	0	0	0	0	0		0	0	0	0	0	0		0	0	0	0	0	0	0	0		0	0	0	0	0	0
AAAAATTCAAATTTAACTCCGTG	23H-RNA	Y69A2AR.16_hairpin		0	0	0	0	0	0	0	0	0	0	0		0	0	0	0	0	0		0	0	0	0	0	0	0	0		0	0	0	0	0	0
AAAAGAACTGAAGAGAGTGGGA	23H-RNA	other		0	0	0	0.06	0	0	0	0	0	0	0		0	0	0	0	0	0		0	0	0	0	0	0	0	0		0	0.04	0	0	0	0
AAAAGAGTTGATATATGTGGGC	23H-RNA	Y59H11AR.6		0	0	0	0	0	0	0	0	0	0	0		0	0	0	0	0	0		0	0	0	0	0	0	0	0		0	0	0	0	0	0
AAAAGTTTATGTTGACGGGGAA	23H-RNA	TC5		0	0	0.19	0	0	0	0	0	0	0	0		0	0	0	0	0	0		0	0	0	0	0.1	0	0	0		0.18	0	0.06	0	0	0
AAAATAAAATGTTCTAGCTCTC	23H-RNA	E01G4.5		0	0	0	0	0	0	0	0	0	0	0		0	0	0	0	0	0		0	0	0	0	0	0	0	0		0	0	0	0	0	0
AAAATGGACGACGTGCTCGACAG	23H-RNA	C14B1.7		0	0	0	0	0	0	0	0	0	0	0		0	0	0	0	0	0		0	0	0	0	0	0	0	0		0	0	0	0	0	0
AAAATTAGCCGCCTACACAACA	23H-RNA	T05E12.10		0	0	0	0	0	0	0	0	0	0	0		0	0	0	0	0	0		0	0	0	0	0	0	0	0		0	0	0	0	0	0
AAAATTCAAATTTAACTCCGTG	23H-RNA	Y69A2AR.16_hairpin		0	0	0	0	0	0	0	0.06	0	0	0		0	0	0.06	0	0	0		0	0	0	0.25	0.1	0	0	0		0	0.05	0	0.05	0	0
AAACATTCGGCAATGGGGTACCC	23H-RNA	Y37E3.30		0	0.19	0	0	0	0	0.06	0.06	0	0	0		0	0.06	0.06	0	0	0		0	0	0	0	0	0	0	0		0	0	0	0	0	0
AAACCACGAATCCTAACCACTAG	23H-RNA	tRNA		0	0	0	0	0	0	0	0	0	0	0		0	0	0	0.07	0.05	0		0	0	0	0	0	0	0	0		0	0	0	0	0	0
AAACCGTGCGGCAGTTGCAGAAA	23H-RNA	DNA-8-1		0	0	0	0	0	0	0	0	0	0	0		0	0	0	0.06	0	0.06		0	0	0	0	0	0	0	0		0	0	0	0	0	0
AAACTGTATTACGGTGGAGTCT	23H-RNA	other		0.21	0.32	0	0	0	0	0	0.12	0	0	0		0	0	0.12	0	0.05	0		0	0.09	0	0	0	0.12	0	0		0	0	0	0	0	0
AAAGAACAAGCCGTGGGCAAGCA	23H-RNA	F39E9.7, F55A4.4		0	0	0	0	0	0	0	0	0	0	0		0	0	0	0	0	0		0	0	0	0	0	0	0	0		0	0	0	0	0	0
AAAGAATCCATTGTCCAGCTCCA	23H-RNA	F55A4.9, rncs-1		0	0	0	0	0	0	0	0	0	0	0		0	0	0	0	0	0		0	0	0	0	0	0	0	0		0	0	0	0	0	0
AAAGGATCACGAGGCTCTTCCTG	23H-RNA	Unknown_IR1		0	0.06	0	0	0	0	0.12	0	0	0.11	0		0	0.12	0	0	0.05	0		0	0	0	0.25	0	0.12	0.09	0.3		0	0	0	0	0	0
AAAGTAAATGCGTTCGGGGGGAA	23H-RNA	Y57G11B.t1		0	0	0	0	0	0	0	0	0	0	0		0	0	0	0	0	0		0	0	0	0	0	0	0	0		0	0	0	0	0	0
AAAGTTGATGGACGGCGAGATT	23H-RNA	PALTTAA1		0	0	0	0	0	0	0	0	0	0	0		0	0	0	0	0	0		0	0	0	0	0	0	0	0		0	0	0	0.05	0	0
AAATCGGAAACTCAAAGACCAC	23H-RNA	Y17D7C.3		0.07	0	0	0	0	0	0	0	0	0	0		0	0	0	0	0	0		0	0	0	0	0	0	0	0		0	0	0	0	0	0
AAATCGGAAACTCAAAGACCACAC	23H-RNA	Y17D7C.3		0	0	0	0	0	0	0	0	0	0	0		0	0	0	0	0	0		0	0	0	0	0	0	0	0		0	0	0	0	0	0
AAATTCAAATTTAACTCCGTGA	23H-RNA	Y69A2AR.16_hairpin		0.14	0	0	0	0	0	0.06	0	0	0	0		0	0.06	0	0	0.05	0		0	0	0	0.25	0.31	0	0	0		0	0	0.06	0	0	0
AAATTGTCGGCCGCCGTGGAAA	23H-RNA	Unknown_hairpin_RE2		0.13	0	0	0	0.05	0.07	0	0	0	0	0		0.07	0	0	0	0.04	0		0	0	0	0	0.19	0	0	0		0	0	0	0.09	0.17	0
AAATTGTCGGCCGCCGTGGAAAA	23H-RNA	other		0	0	0	0	0	0	0	0	0	0	0		0	0	0	0	0	0		0	0	0	0	0	0	0	0		0.18	0.05	0	0	0	0
AACAACGAAGCTCCGAAATAACG	23H-RNA	PALTTAA1		0	0	0	0	0.23	0	0.06	0	0	0	0		0	0.06	0	0	0	0		0	0	0.12	0	0	0	0	0		0	0.05	0.19	0	0	0
AACCCTGAACCAGACGTACCAA	23H-RNA	F31C3.11, rrn-2.1		0.03	0.13	0.1	0	0.03	0.04	0.03	0.06	0.44	0	0.22		0.04	0.03	0.06	0.11	0.1	0.07		0	0	0	0	0.05	0	0	0		0	0	0	0	0	0
AACTGCCGCACGGTTTCGAAACT	23H-RNA	DNA-8-1		0	0	0	0	0	0	0	0.06	0	0	0		0	0	0.06	0	0	0.07		0	0	0	0	0	0	0	0		0	0	0	0	0	0
AACTTAAAACCAACAATGAACA	23H-RNA	Y36E3A.2		0	0	0	0	0	0	0	0	0	0	0		0	0	0	0	0	0		0	0	0	0	0	0	0	0		0	0	0	0	0	0
AAGAATCCATTGTCCAGCTCC	23H-RNA	F55A4.9, rncs-1		0	0	0	0.21	0	0	0	0	0	0	0		0	0	0	0	0	0		0	0	0	0	0	0	0	0		0	0	0	0	0	0
AAGACATCTCAGAAACATCGG	23H-RNA	F43E2.6		0	0.26	0	0.21	0	0.07	0	0	0	0	0		0.07	0	0	0	0	0		0	0	0.13	0	0	0	0.18	0		0	0	0	0	0	0
AAGACATCTCAGAAACATCGGCAA	23H-RNA	F43E2.6		0.07	0	0.06	0	0	0	0	0	0	0	0		0	0	0	0	0	0		0	0	0	0	0	0	0	0		0	0	0	0	0	0
AAGAGCCTCGTGATCCTTTGG	23H-RNA	Unknown_IR1		0	0.06	0	0	0	0	0	0	0	0	0		0	0	0	0	0	0		0	0	0	0	0	0.12	0	0		0	0	0	0	0	0
AAGAGCCTCGTGATCCTTTGGAG	23H-RNA	Unknown_IR1		0	0	0	0	0	0	0	0	0	0	0		0	0	0	0	0	0		0	0	0	0	0	0	0	0		0	0	0	0	0	0
AAGCACGCCGTCTCTGAGGGAAC	23H-RNA	other		0	0	0	0	0	0	0	0	0	0	0		0	0	0	0	0	0		0	0	0	0	0	0	0	0		0	0	0	0	0	0
AAGCGACACGTTCTACGAGGG	23H-RNA	F55A4.9, rncs-1		0	0	0	0	0	0	0	0	0	0	0		0	0	0	0	0	0		0	0	0	0	0	0	0	0		0	0	0	0	0	0
AAGCGACACGTTCTACGAGGGA	23H-RNA	F55A4.9, rncs-1		0	0	0	0	0	0	0	0.06	0	0	0		0	0	0.06	0	0	0		0	0	0	0	0	0	0	0		0	0	0	0	0	0
AAGCGGACTGGAGCACATTGGA	23H-RNA	F55A4.9, rncs-1		0	0	0	0	0	0	0	0	0	0	0		0	0	0	0	0	0		0	0	0	0	0	0	0	0		0	0	0.06	0	0	0
AAGGACGGAAAGAAGAGACGC	23H-RNA	F55G1.3, his-62		0	0	0	0	0	0	0	0	0	0	0		0	0	0	0	0	0		0	0	0	0	0	0	0	0		0	0	0	0	0	0
AAGTATGATTGATATTGGGAAC	23H-RNA	Y59H11AR.6		0	0	0	0	0	0	0	0	0	0	0		0	0	0	0	0	0		0	0	0	0	0	0	0	0		0	0	0	0.05	0	0
AATAAAAACAATGGACAACTG	23H-RNA	Y59H11AR.6		0	0	0	0	0	0	0	0	0	0	0		0	0	0	0	0	0		0	0	0	0	0	0	0	0		0	0	0	0	0	0
AATACCTAACGAGACCCAACTTT	23H-RNA	PALTA3		0	0	0	0	0	0	0	0	0	0	0		0	0	0	0	0	0		0	0	0	0	0	0	0	0		0	0	0	0	0	0
AATACGCCCATTTCTGCAACTG	23H-RNA	DNA-8-1		0	0	0	0	0	0	0	0	0	0	0		0	0	0	0	0	0		0	0	0	0	0	0.11	0	0		0	0.05	0	0	0	0
AATATTTATTTCGCATCCCTCCC	23H-RNA	Y57G11C.36, Y57G11C.51		0.07	0	0	0	0	0	0	0	0	0	0		0	0	0	0	0	0		0	0	0	0	0	0	0	0		0	0	0	0	0	0
AATATTTATTTCGCATCCCTCCCC	23H-RNA	Y57G11C.36, Y57G11C.51		0	0	0	0	0	0	0	0	0	0	0		0	0	0	0	0	0		0	0	0	0	0	0	0	0		0	0	0.06	0	0	0
AATCTACTTAAATCAACGAAT	23H-RNA	mek-2, Y54E10BL.6, Y71F9AL.1		0	0	0	0	0	0	0	0	0	0	0		0	0	0	0	0	0		0	0	0	0	0	0.12	0	0		0	0	0	0	0	0
AATGAAACGAGTGCTGCGAAAAC	23H-RNA	Y116A8B.1		0	0.13	0	0	0	0	0	0	0	0	0		0	0	0	0	0	0		0	0	0	0	0	0	0	0		0	0	0	0	0	0
AATTCCACTTGGGGTAAATTCG	23H-RNA	C36A4.14		0.21	0.06	0	0	0	0	0	0	0	0	0		0	0	0	0	0	0		0	0	0	0	0	0.12	0	0		0	0	0	0	0	0
AATTCTCGTTCTCTCCACACAC	23H-RNA	R119.7, rnp-8		0	0	0	0	0	0	0	0	0	0	0		0	0	0	0	0	0		0	0	0	0	0	0	0	0		0	0	0	0	0	0
AATTCTCTCGTAGAACGTGTCG	23H-RNA	F55A4.9, rncs-1		0	0.06	0	0.07	0	0	0	0	0	0	0		0	0	0	0	0	0		0	0	0	0.5	0.1	0.12	0	0		0	0	0	0	0	0
AATTGTCGGCCGCCGTGGAAAA	23H-RNA	other		0	0	0.06	0	0.06	0	0	0	0	0	0		0	0	0	0	0	0		0	0	0	0	0	0	0	0		0	0	0	0	0	0
AATTGTCGGCCGCTGTGGAAACC	23H-RNA	ChrV_unknown_hairpin1		0.07	0	0	0	0	0	0	0	0	0	0		0	0	0	0	0	0		0	0	0.13	0	0	0	0	0		0	0	0.06	0	0	0
ACATTTTCGGCCAGTGGGGCACA	23H-RNA	other		0.14	0.06	0	0	0	0	0	0	0	0	0		0	0	0	0	0	0		0	0	0	0	0	0	0	0		0	0	0	0	0	0
ACCACTGAACCACCGATGCGA	23H-RNA	other		0	0.06	0.06	0.36	0.06	0.07	0.12	0	0.35	0.63	0.15		0.07	0.12	0	0.07	0.14	0		0	0	0	0	0	0	0.09	0		0	0	0	0	0	0
ACCACTTCCGCAGACGCTACA	23H-RNA	Y37E3.30		0.07	0.06	0	0	0.06	0	0	0	0	0	0		0	0	0	0	0	0		0	0	0	0	0	0	0	0		0	0	0	0	0	0
ACCACTTCCGCAGACGCTACAAC	23H-RNA	Y37E3.30		0	0.06	0	0	0	0	0	0	0	0	0		0	0	0	0	0	0		0	0	0	0	0	0	0	0		0	0	0	0	0	0
ACCATCCGGATGCTTCATGTTTC	23H-RNA	E01G4.7		0	0.06	0	0	0.12	0	0	0	0	0	0		0	0	0	0	0	0		0	0	0	0	0	0	0	0		0	0	0	0	0	0
ACCGAGCTCACAATGATATTGC	23H-RNA	F52G3.8		0	0	0	0	0	0	0	0	0	0	0		0	0	0	0	0	0		0	0	0	0	0	0	0	0		0	0	0	0	0	0
ACCGGGTTAGTATTTTCAAGCA	23H-RNA	ZK1236.8		0	0	0	0	0	0	0	0	0	0	0		0	0	0	0	0	0		0	0	0	0	0	0	0	0		0	0	0	0	0	0
ACCGGTACAGAGAGTGTGGATA	23H-RNA	lin-29, other, W03C9.4		0	0	0	0	0	0.07	0	0	0	0	0		0.07	0	0	0	0	0		0	0	0	0	0	0	0	0		0	0	0	0	0	0
ACGACGATGGCTGCGGCGAGG	23H-RNA	Y57G11C.1145_hairpin		0	0	0	0	0	0.07	0.06	0.06	0.17	0	0		0.07	0.06	0.06	0	0	0.07		0	0	0	0	0	0	0	0		0	0	0	0	0	0
ACGACGATGGCTGCGGCGAGGA	23H-RNA	Y57G11C.1145_hairpin		0	0	0.13	0	0	0	0	0	0.17	0	0		0	0	0	0	0	0		0	0	0	0	0	0.24	0	0		0	0	0	0	0	0
ACGACGATGGCTGCGGCGAGGAT	23H-RNA	Y57G11C.1145_hairpin		0	0	0	0	0	0.07	0.12	0	0	0.11	0		0.07	0.12	0	0	0	0.07		0	0	0	0	0	0	0	0		0	0	0.06	0	0	0
ACGATGGATTCTTTGGAGCAAC	23H-RNA	F55A4.9, rncs-1		0	0	0	0.36	0	0	0.06	0	0	0	0		0	0.06	0	0	0	0		0	0	0	0	0	0	0	0		0	0	0	0.05	0	0
ACGATGGATTCTTTGGAGCAACC	23H-RNA	F55A4.9, rncs-1		0.07	0	0.13	0	0.12	0.14	0.12	0	0	0	0		0.14	0.12	0	0.14	0	0		0.14	0	0	0	0	0	0	0		0	0	0	0.05	0	0
ACGATGGCTGCGGCGAGGATGA	23H-RNA	Y57G11C.1145_hairpin		0	0	0	0	0	0.07	0	0	0	0	0		0.07	0	0	0	0	0		0	0	0	0	0	0	0	0		0	0	0	0	0	0
ACGATTTTGAACGTATAGACCCA	23H-RNA	Y29A2AR.16		0	0	0	0	0	0	0	0	0	0	0		0	0	0	0	0	0		0	0	0	0	0	0	0	0		0	0	0	0	0	0
ACGGAGTTAAATTTGAATTTTTT	23H-RNA	Y69A2AR.16_hairpin		0.07	0	0	0	0	0	0	0	0	0	0		0	0	0	0	0	0		0	0	0	0	0.1	0	0	0		0	0.05	0.06	0	0	0
ACGGCAACTCGGTCCAAAACCA	23H-RNA	PALNN1		0	0	0	0	0	0.07	0	0	0	0	0		0.07	0	0	0	0	0		0	0	0	0	0	0	0	0		0	0	0	0	0	0
ACGTGTTCCAGCATTCTTCGA	23H-RNA	Y37E3.30		0	0.19	0	0	0	0	0	0	0	0	0		0	0	0	0	0	0		0	0	0	0	0	0	0	0		0	0	0	0	0	0
ACTATCTACACTCTCTGTACCGG	23H-RNA	Unknown_RE2		0	0	0	0.06	0	0	0	0	0	0	0		0	0	0	0	0	0.06		0	0	0	0	0.09	0	0	0		0	0	0	0	0	0
ACTGCCGCACGGTTTCGAAACT	23H-RNA	DNA-8-1		0	0	0.06	0	0	0	0	0	0	0	0		0	0	0	0	0	0.14		0	0	0	0	0	0	0	0		0.18	0.05	0.06	0.1	0	0
ACTGCCGCACGGTTTTGAAAC	23H-RNA	DNA-8-1		0	0	0	0	0	0	0	0	0	0	0		0	0	0	0	0	0		0	0	0	0	0	0	0	0		0	0	0	0	0	0
ACTGCCGCACGGTTTTGAAACTG	23H-RNA	DNA-8-1		0	0	0.13	0	0	0	0	0	0	0	0		0	0	0	0	0	0		0.14	0	0	0	0	0	0	0		0	0	0	0	0	0
ACTGCTCTACTGAATACAACACC	23H-RNA	F31C3.10, F31C3.9, rrn-3.1, rrn-3.56		0.07	0	0	0	0	0	0	0	0	0	0		0	0	0	0	0	0		0	0	0	0	0	0	0	0		0	0	0	0	0	0
ACTTCTTCCACGCCATCATCC	23H-RNA	Y57G11C.1145_hairpin		0	0	0	0	0	0	0	0	0	0	0		0	0	0	0	0	0		0	0	0	0	0	0	0	0		0	0	0	0	0	0
ACTTCTTCCACGCCATCATCCACA	23H-RNA	Y57G11C.1145_hairpin		0	0.06	0	0	0	0	0	0	0	0	0		0	0	0	0	0	0		0.14	0	0	0	0.1	0	0	0		0	0.05	0	0.05	0	0
ACTTTTTCAGCGGTCTCGTTATA	23H-RNA	PAL5A		0	0	0	0	0	0	0	0	0	0	0		0	0	0	0	0	0		0	0	0	0	0	0	0	0		0	0	0	0	0	0
AGAACGTGTCGCTTCGTCATCTG	23H-RNA	F55A4.9, rncs-1		0	0	0.26	0.07	0	0	0	0.06	0	0	0		0	0	0.06	0.07	0	0		0	0	0	0	0	0	0	0		0	0	0	0	0	0
AGAAGACCATTAGACAGCACCC	23H-RNA	K06C4.23, other		0	0	0	0	0	0	0	0	0	0	0		0	0	0	0	0	0		0	0	0	0	0	0	0	0		0	0	0	0	0	0
AGACCACTTCCGCAGACGCTACA	23H-RNA	Y37E3.30		0	0	0	0	0	0	0	0	0	0	0		0	0	0	0	0	0		0	0	0	0	0	0	0	0		0	0	0	0	0	0
AGACGCAGGGCTGGTCGCGATG	23H-RNA	Y57G11C.51		0	0	0	0	0	0	0.06	0	0	0.11	0		0	0.06	0	0	0.05	0		0	0	0	0	0	0	0	0		0.18	0	0	0	0	0
AGAGCTTATGCCCTATGTATGG	23H-RNA	F31C3.10, F31C3.9, rrn-3.1, rrn-3.56		0	0	0	0	0	0	0	0	0	0	0		0	0	0	0	0	0		0	0	0	0	0	0	0	0.1		0	0.05	0	0	0	0
AGAGGTCCAAGTAAGATGATAG	23H-RNA	F39E9.7		0	0	0	0	0	0	0	0	0	0	0		0	0	0	0	0	0		0	0	0	0	0	0	0	0		0	0	0	0	0	0
AGAGTGACAGACATCCGGGAC	23H-RNA	Unknown_RE2		0	0	0	0	0	0	0	0	0	0	0		0	0	0	0	0	0		0	0	0	0	0	0	0	0		0	0	0	0	0	0.19
AGAGTGACAGACATCCGGGACC	23H-RNA	Unknown_RE2		0	0	0	0	0	0	0	0	0.33	0	0		0	0	0	0.14	0	0.07		0	0	0	0	0	0	0	0		0	0	0	0.05	0	0
AGAGTGACAGACATCCGGGACCT	23H-RNA	Unknown_RE2		0	0	0	0	0	0	0	0	0	0	0		0	0	0	0	0	0		0	0	0	0	0	0	0	0.1		0	0	0	0	0	0
AGAGTGTAGTCAGCTGAAGAGAC	23H-RNA	rft-2, Y47D7A.14_IR, Y47D7A.14_IR_element		0	0	0	0	0	0	0	0	0	0	0		0	0	0	0	0	0		0	0	0	0	0	0	0	0		0	0	0	0	0	0
AGCAAGAGGAAGAGAAACAAAAG	23H-RNA	F19B2.5		0	0	0	0	0	0	0	0	0	0	0		0	0	0	0	0	0		0	0	0	0	0	0	0	0		0	0	0	0	0	0
AGCACTAATAGAGAATATACGGT	23H-RNA	Unknown_RE6		0	0	0	0	0	0	0	0	0	0	0		0	0	0	0	0	0		0	0	0	0	0	0	0	0		0	0	0	0	0	0
AGCCGGCCCTTACCGTTTAATAC	23H-RNA	mir-5592		0	0	0	0	0	0	0	0	0	0	0		0	0	0	0	0	0		0	0	0	0	0	0	0	0		0	0	0	0	0	0
AGCCGTGGTCGATGCTGAAAG	23H-RNA	F55A4.9, rncs-1		0	0.06	0	0.07	0.06	0	0.06	0	0	0	0		0	0.06	0	0	0	0		0	0	0	0	0	0	0.09	0		0	0	0	0	0	0
AGCCGTGGTCGATGCTGAAAGG	23H-RNA	F55A4.9, rncs-1		0	0.06	0.51	0.28	0.29	0.21	0.12	0.06	0	0	0		0.21	0.12	0.06	0	0.1	0		0.41	0	0	0.25	0.2	0	0.09	0		0	0.15	0.13	0	0.37	0
AGCCGTGGTCGATGCTGAAAGGT	23H-RNA	F55A4.9, rncs-1		0.07	0.06	0.06	0.28	0.29	0.21	0.06	0	0	0	0		0.21	0.06	0	0	0	0		0	0	0	0	0.1	0	0	0.1		0.18	0.05	0.13	0	0.18	0
AGCCTCGTGATCCTTTGGAGCTG	23H-RNA	Unknown_IR1		0	0	0	0	0	0	0	0	0	0	0		0	0	0	0	0	0		0	0	0	0	0	0	0	0		0	0	0	0	0	0
AGCGAAAACTACAGTAAGAACT	23H-RNA	PALTA4		0	0	0	0	0	0	0	0	0	0	0		0	0	0	0	0	0		0	0	0	0	0	0	0	0		0	0.1	0.06	0	0	0
AGCGAAAACTACAGTAATTCTT	23H-RNA	CELE1		0.06	0.05	0.11	0	0	0	0.1	0	0	0.09	0		0	0.1	0	0	0.04	0.06		0	0	0.11	0	0.09	0	0	0		0.44	0.17	0.11	0.08	0	0
AGCGAAAACTACAGTAATTCTTT	23H-RNA	CELE1		0	0	0	0	0	0	0	0	0	0	0		0	0	0	0	0	0.06		0	0	0	0	0	0	0	0		0	0	0	0	0	0.18
AGCGACACGTTCTACGAGGGA	23H-RNA	F55A4.9, rncs-1		0	0	0	0	0	0	0	0	0	0	0		0	0	0	0	0	0		0	0	0	0	0	0	0	0		0	0	0	0	0	0
AGCGACACGTTCTACGAGGGAAT	23H-RNA	F55A4.9, rncs-1		0	0	0	0	0.06	0.07	0	0	0	0	0		0.07	0	0	0.07	0.05	0.07		0	0	0	0.25	0	0	0	0		0	0	0	0	0	0
AGCGGTCTCGTTATGAAAATCAG	23H-RNA	PAL5A		0	0	0	0	0	0	0	0	0	0	0		0	0	0	0	0	0		0	0	0	0	0	0	0	0		0.17	0.05	0.06	0	0	0
AGGATCAGAACATCAGGAAGAGC	23H-RNA	Unknown_IR1		0	0	0	0	0	0	0	0	0	0	0		0	0	0	0	0	0		0	0	0	0	0	0	0	0		0	0	0	0.1	0	0
AGGCACAGTTCTGTGGGCGGGG	23H-RNA	24F12A.4, H15N14.4, H37A05.4, Y24F12A.3		0	0.06	0	0	0	0	0.06	0	0	0	0		0	0.06	0	0	0	0		0	0	0	0	0	0	0	0		0	0	0	0	0	0
AGGCACAGTTCTGTGGGCGGGGC	23H-RNA	H15N14.4, H37A05.4, Y24F12A.3, Y24F12A.4		0	0.13	0	0	0	0	0	0	0	0	0		0	0	0	0	0	0		0	0	0	0	0	0	0	0.2		0	0	0	0	0	0
AGGCACATTTTAAGTCGGTAGGC	23H-RNA	gmps-1, M106.4		0	0	0	0	0	0	0	0	0	0	0		0	0	0	0	0	0		0.14	0	0	0	0	0	0	0		0	0	0	0	0	0
AGGTACAGAACTGTGGGCGGGGC	23H-RNA	Y24F12A.3, Y24F12A.4		0	0	0	0	0	0	0	0	0	0	0		0	0	0	0	0	0		0	0	0	0	0	0	0	0		0	0	0	0	0	0
AGTCGGGTTGCTTGAAAGTGC	23H-RNA	F31C3.9, rrn-3.1		0	0	0	0	0	0	0	0	0	0	0		0	0	0	0	0	0		0	0	0	0.25	0	0	0	0		0	0	0	0	0	0
AGTGACAGACATCCGGGACCT	23H-RNA	Unknown_RE2		0	0	0	0	0	0.14	0.12	0	0.17	0.11	0		0.14	0.12	0	0	0	0		0	0	0	0	0	0	0	0		0	0.05	0	0	0	0
AGTGAGGCTCAGGATTTTGAGTG	23H-RNA	M4.2, puf-4		0	0	0	0	0	0	0	0	0	0	0		0	0	0	0	0	0		0	0	0	0	0	0	0	0		0	0	0	0	0	0
AGTTCAACAGGTAGATCAAAAA	23H-RNA	TIR54TA1		0	0	0	0	0	0	0	0	0	0	0		0	0	0	0	0	0		0	0	0	0	0	0	0	0		0	0	0	0	0	0
AGTTCAAGTCTCTCGATGCTCG	23H-RNA	F55A4.9, rncs-1		0	0.06	0	0	0	0	0	0.06	0	0	0		0	0	0.06	0	0.05	0		0	0	0	0	0	0	0	0		0	0	0	0	0	0
ATAAATCGACGTTTCTTTCACAA	23H-RNA	hcp-1, ZK1055.1		0	0	0	0	0	0	0	0	0	0	0		0	0	0	0	0	0		0	0	0	0	0	0	0	0		0	0	0	0	0	0
ATAACGAGACCGCTGAAAAAGT	23H-RNA	PAL5A		0	0.06	0	0	0.06	0.07	0	0.06	0	0	0.28		0.07	0	0.06	0.07	0	0.13		0	0	0	0.24	0.1	0	0	0.1		0	0.05	0.06	0.14	0	0.38
ATAACGAGACCGCTGAAAAAGTT	23H-RNA	PAL5A		0.07	0	0	0.07	0.06	0	0.06	0	0	0	0		0	0.06	0	0	0	0		0	0	0.12	0	0	0	0	0		0	0.24	0.18	0.05	0	0.38
ATACAATGAAAACAACACTTTTG	23H-RNA	F23B2.9		0	0	0	0	0	0	0	0	0	0	0		0	0	0	0	0	0		0	0	0	0	0	0	0	0		0	0	0	0	0	0
ATAGAGCGAGAATTAACAAGA	23H-RNA	DNA-8-1		0	0	0	0	0	0	0	0	0	0	0		0	0	0	0	0	0		0	0	0	0	0	0	0	0		0	0	0	0	0	0
ATAGAGCGAGAATTAACAAGAA	23H-RNA	DNA-8-1		0	0	0	0	0	0	0	0	0	0	0		0	0	0	0	0	0		0	0	0	0	0	0	0	0		0	0	0	0	0	0
ATATTTGGAACAGAAGCAAGA	23H-RNA	F19B2.5		0	0	0	0	0	0	0	0	0	0	0		0	0	0	0	0	0		0	0	0	0	0	0	0	0		0	0	0	0	0	0
ATATTTGGAACAGAAGCAAGAG	23H-RNA	F19B2.5		0	0	0	0	0	0	0	0	0	0	0		0	0	0	0	0	0.07		0	0	0	0	0	0	0	0		0	0	0.06	0	0	0
ATATTTGGAACAGAAGCAAGAGG	23H-RNA	F19B2.5		0	0	0	0	0	0	0	0	0	0	0		0	0	0	0	0	0		0	0	0	0.25	0	0	0.18	0.2		0	0.05	0.06	0.05	0	0
ATCACATAACTCCGCCCCCTGA	23H-RNA	other		0	0	0	0	0	0	0	0	0	0	0		0	0	0	0	0	0		0	0	0	0	0	0	0	0		0	0	0	0	0	0
ATCATCCTCGCCGCAGCCATCGT	23H-RNA	Y57G11C.1145_hairpin		0	0	0	0	0.06	0	0	0	0	0	0		0	0	0	0	0.05	0		0	0	0	0	0	0	0	0		0	0	0	0	0	0
ATCCACGACGGCCGACAATTTCC	23H-RNA	Unknown_hairpin_RE2		0.07	0.06	0	0	0.11	0	0	0.06	0	0	0		0	0	0.06	0	0.05	0		0	0	0	0	0	0	0	0		0	0	0	0	0	0
ATCCTCGCCGCAGCCATCGTCG	23H-RNA	Y57G11C.1145_hairpin		0.07	0.13	0.19	0	0.12	0	0.06	0	0	0	0		0	0.06	0	0.28	0.14	0		0	0	0.13	0	0	0.12	0.09	0.1		0	0	0	0	0	0
ATCCTTGTACCAGTTATCTGCAA	23H-RNA	K02E2.11		0	0	0	0	0	0	0	0	0	0	0		0	0	0	0	0	0		0	0	0	0	0	0	0	0		0	0	0	0	0	0
ATCGACACAAGCGCTACAGTAGC	23H-RNA	CELE1		0	0	0	0	0	0	0	0	0	0	0		0	0	0	0	0.04	0		0	0	0	0	0	0	0	0		0	0	0	0	0	0
ATCGACACAAGCGCTACAGTAGT	23H-RNA	CELE1		0	0	0	0	0	0	0	0	0	0	0		0	0	0	0	0	0		0	0	0	0	0	0.11	0	0		0	0	0	0	0	0.2
ATCGTCGTCGTCATCCACTCCACT	23H-RNA	Y57G11C.1145_hairpin		0.21	0	0	0	0	0	0	0	0	0	0		0	0	0	0	0	0.07		0	0.09	0	0	0	0	0	0		0	0.05	0	0	0	0
ATCTACATGTGATCTACGCGAAT	23H-RNA	pcp-4, Unknown_RE8, Y116F11B.3, Y15E3A.3, Y6B3B.7, Y6B3B.9		0	0	0	0	0	0	0	0	0	0	0		0	0	0	0	0	0		0	0	0	0	0	0	0	0		0	0	0	0	0	0.2
ATCTACCTGTTGAACTTGACTCC	23H-RNA	TIR54TA1		0	0.06	0	0	0	0	0	0	0	0	0		0	0	0	0	0	0		0	0	0	0	0.19	0	0	0		0	0	0	0	0	0
ATCTACCTGTTGAACTTGACTCT	23H-RNA	F08B1.2, gcy-12		0	0	0	0	0	0	0.06	0	0	0	0		0	0.06	0	0	0	0		0	0	0.13	0.25	0	0	0	0		0	0	0	0	0	0
ATCTCTGATCTTTTCCAATTCTT	23H-RNA	F55A4.9, rncs-1		0	0.06	0.38	0	0.06	0	0.06	0	0	0	0		0	0.06	0	0.14	0	0		0	0	0	0	0	0	0	0		0	0	0	0	0	0
ATGAACCACAAGCGAAATCGCCC	23H-RNA	Y37E3.30		0.07	0	0	0	0	0	0	0	0	0	0		0	0	0	0	0	0		0	0	0	0	0	0	0	0		0	0	0	0	0	0
ATGAAGAGGCAGGGTCCGGTTGCG	23H-RNA	Y57G11C.1145_hairpin		0	0	0	0	0	0	0	0	0	0	0.15		0	0	0	0	0.05	0.07		0	0	0	0.5	0	0	0	0		0	0	0.06	0.1	0	0
ATGATGTGGATGATGGCGTGGA	23H-RNA	Y57G11C.1145_hairpin		0	0	0	0.14	0	0	0	0	0	0	0		0	0	0	0	0	0		0	0	0.13	0	0	0	0	0		0	0	0	0	0	0
ATGATGTGGATGATGGCGTGGAA	23H-RNA	Y57G11C.1145_hairpin		0	0	0	0	0.06	0	0	0	0	0	0		0	0	0	0	0	0		0	0	0.13	0	0	0	0.09	0.1		0	0	0.06	0.1	0.18	0
ATGATTTATTGTTCCCGTAAT	23H-RNA	PALTA4		0	0	0	0	0	0	0	0	0	0	0		0	0	0	0	0	0		0	0	0	0	0	0	0	0		0	0	0	0	0	0
ATGCTCGTCGATCCAGTTTGGCC	23H-RNA	F55A4.9, rncs-1		0	0	0.06	0.07	0	0.07	0	0	0	0	0		0.07	0	0	0	0.14	0.07		0	0	0	0	0	0	0	0		0	0	0	0	0	0
ATGGATAGCTCAGTGGATAGT	23H-RNA	irld-17, Y46H3D.4		0	0	0	0	0	0	0	0	0	0	0		0	0	0	0	0	0		0	0	0	0	0.1	0	0	0		0	0	0	0	0	0
ATGGCAGCCGATGTGAATGAAGA	23H-RNA	T05E12.8		0.07	0.13	0	0	0	0	0	0	0	0	0		0	0	0	0	0	0		0	0	0.13	0	0	0	0	0		0	0	0	0	0	0
ATGTATTAAACGGTAAGGGCC	23H-RNA	mir-5592		0	0	0.13	0.21	0.12	0.21	0.12	0.17	0	0	0		0.21	0.12	0.17	0.28	0.1	0.07		0.14	0.09	0.25	1.25	0.31	0.35	0.46	0.4		0.18	0.15	0.19	0.3	0.18	0.2
ATGTATTAAACGGTAAGGGCCG	23H-RNA	mir-5592		0	0	0.26	0	0.06	0.07	0.06	0	0	0	0		0.07	0.06	0	0.14	0	0		0	0.27	0.25	0.25	0	0	0.37	0.3		0	0.1	0.19	0	0	0
ATGTATTAAACGGTAAGGGCCGG	23H-RNA	mir-5592		0	0	0.26	0.43	0.06	0.07	0	0.06	0	0	0		0.07	0	0.06	0.14	0.14	0.14		0.28	0.09	0.63	0.5	0.92	0.35	0.46	0.4		0	0.1	0	0.15	0	0
ATGTATTAAACGGTAAGGGCCGGC	23H-RNA	mir-5592		0	0	0	0	0	0	0	0	0	0	0		0	0	0	0	0	0		0	0	0	0	0	0	0	0		0	0	0	0	0	0
ATGTGGATGATGGCGTGGAAGA	23H-RNA	Y57G11C.1145_hairpin		0	0	0	0	0	0	0	0	0	0	0		0	0	0	0	0.05	0		0	0	0	0	0	0	0	0		0	0.05	0	0	0	0.2
ATGTTTCTGAGATGTCTTCACA	23H-RNA	F43E2.6		0.07	0	0	0	0	0.07	0	0	0	0	0		0.07	0	0	0.14	0	0		0	0.09	0.13	0.25	0.1	0	0	0		0	0.05	0	0.05	0	0
ATGTTTCTGAGATGTCTTCACAA	23H-RNA	F43E2.6		0	0	0	0	0	0	0	0	0	0	0		0	0	0	0	0	0		0	0	0	0	0	0	0.09	0.1		0	0	0	0	0	0
ATTAAACGGTAAGGGCCGGCT	23H-RNA	mir-5592		0	0	0.21	0.43	0.27	0.19	0.2	0.23	0.12	0.35	0		0.19	0.2	0.23	0.05	0.22	0.18		0.28	0.3	0.17	0	0.54	0.24	0.18	0.4		0	0.13	0.04	0.03	0	0
ATTAAACGGTAAGGGCCGGCTG	23H-RNA	mir-5592		0.05	0	3.37	3.28	2.24	1.36	1.19	0.89	0.58	0.77	0.19		1.36	1.19	0.89	1.6	1.4	1.24		1.47	1.48	1.43	2.83	2.92	2.6	1.53	2.29		0.35	0.23	0.86	0.37	0.25	0.4
ATTAAACGGTAAGGGCCGGCTGG	23H-RNA	mir-5592		0	0	2.01	2.66	2.09	1.03	0.71	0.74	0.7	0.63	0.39		1.03	0.71	0.74	1.83	2.16	2.16		2.21	2.01	1.26	3.33	4.14	1.89	1.78	1.82		1.89	0.57	1.45	0.27	0.37	0.67
ATTAGATACCGTACCCCGAAAAC	23H-RNA	ChrIII_hairpin2		0	0	0	0	0	0	0	0	0	0	0		0	0	0	0	0	0		0	0	0	0	0	0	0	0		0	0	0	0	0	0
ATTAGATACCGTACCCCGAAAACT	23H-RNA	ChrIII_hairpin2		0	0	0	0.14	0	0	0	0	0	0	0		0	0	0	0	0	0		0	0	0	0	0	0	0	0		0	0	0	0	0	0
ATTCGGGAATTAGTTGTCGACAC	23H-RNA	T05E12.8		0.35	0.19	0	0	0	0	0	0	0	0	0		0	0	0	0.07	0	0		0	0.09	0.13	0	0	0	0.09	0.1		0	0.05	0	0.05	0	0
ATTCTCTCGTAGAACGTGTCGC	23H-RNA	F55A4.9, rncs-1		0.07	0	0.26	0	0.12	0.07	0	0	0	0	0		0.07	0	0	0	0	0		0	0	0	0	0	0	0	0		0	0	0	0	0	0
ATTCTCTCGTAGAACGTGTCGCT	23H-RNA	F55A4.9, rncs-1		0.14	0.19	0	0.14	0	0.07	0.12	0.12	0	0	0		0.07	0.12	0.12	0.14	0.24	0		0	0	0	0.5	0.51	0.12	0.09	0		0	0	0	0.05	0	0
ATTGAGACCAGTGATAGCGACC	23H-RNA	F19G12.2, F58F9.1		0	0	0	0	0	0	0	0	0	0	0		0	0	0	0	0	0		0	0	0	0	0	0	0	0		0	0	0	0	0	0
ATTGCCAGTCGAGTCAGAAAATC	23H-RNA	Y116F11A.1		0.14	0	0	0	0	0	0	0	0	0	0		0	0	0	0	0	0		0	0	0	0	0	0	0	0		0	0	0	0	0	0
ATTGTCGGCCGCCGTGGAAAAC	23H-RNA	other		0.07	0	0	0	0	0	0	0	0	0	0		0	0	0	0	0	0		0	0	0	0	0	0	0	0		0	0	0	0	0	0
ATTTTGGGGGGCAGAAATCGGAA	23H-RNA	PAL8C		0	0	0	0	0	0	0	0	0	0	0		0	0	0	0	0	0		0	0	0	0	0	0	0	0		0	0	0	0	0	0
CAAAAATCGCCCGAAAATTCAC	23H-RNA	pde-2, R08D7.6		0	0	0	0	0	0	0	0	0	0	0		0	0	0	0	0	0		0	0	0	0	0	0	0	0		0	0	0	0	0	0
CAAAATTGGCGGAGCGATCGTTC	23H-RNA	other		0.07	0	0	0	0	0	0	0	0	0	0		0	0	0	0	0	0		0	0	0	0	0	0	0	0		0	0	0	0	0	0
CAAAATTTCCGCCCCATGCTTAC	23H-RNA	Y37E3.30		0.07	0	0	0	0	0	0	0	0	0	0		0	0	0	0	0	0		0	0	0	0	0	0	0	0		0	0	0	0	0	0
CAAACTGGATTGACGAGCATCG	23H-RNA	F55A4.9, rncs-1		0	0	0	0	0	0.07	0	0.06	0	0	0		0.07	0	0.06	0.07	0	0.07		0.14	0	0	0	0.1	0	0	0		0	0.05	0.06	0	0	0
CAAATCGTCTCTTCCGCGCGCC	23H-RNA	Unknown_RE2		0	0	0	0	0	0	0	0	0	0	0		0	0	0	0	0	0		0	0	0	0	0	0	0	0		0	0	0	0	0	0
CAACCCTGAACCAGACGTACCA	23H-RNA	F31C3.11, rrn-2.1		0.1	0	0	0	0.03	0.04	0.09	0.06	0.09	0.11	0.07		0.04	0.09	0.06	0.04	0.02	0.07		0	0	0	0	0	0	0	0		0	0	0	0	0	0
CAACCGGACCCTGCCTCTTCATC	23H-RNA	Y57G11C.1145_hairpin		0	0	0	0	0	0	0	0	0	0	0		0	0	0	0	0.02	0		0	0	0	0	0.1	0	0	0		0	0	0	0	0	0
CAAGAGGAAGAGAAACAAAAGG	23H-RNA	F19B2.5		0	0	0	0	0	0	0	0	0	0	0		0	0	0	0	0	0		0	0	0	0	0	0	0	0		0.18	0	0	0	0	0
CAAGAGGAAGAGAAACAAAAGGA	23H-RNA	F19B2.5		0	0	0	0	0	0	0	0	0	0	0		0	0	0	0	0	0		0	0	0	0	0	0	0	0		0	0.1	0	0	0	0
CAAGTTCAACAGGTAGATCAAA	23H-RNA	TIR54TA1		0	0	0	0.21	0	0	0	0	0	0	0		0	0	0	0	0	0		0	0	0	0	0	0	0	0		0	0	0.06	0.05	0	0
CAAGTTCAACAGGTAGATCAAAA	23H-RNA	TIR54TA1		0	0	0	0	0	0	0	0	0	0	0		0	0	0	0	0	0		0	0	0	0	0	0	0	0		0	0	0	0	0	0
CAATGAAAACAACACTTTTGGT	23H-RNA	F23B2.9		0	0	0	0	0	0	0	0	0	0	0		0	0	0	0	0	0		0	0	0	0	0	0	0	0		0	0	0	0	0	0
CAATGTATGGAGGACGAACACA	23H-RNA	C36A4.14		0.07	0	0	0	0	0	0	0	0	0	0		0	0	0	0	0	0		0	0	0	0	0	0	0	0		0	0	0	0	0	0
CAATGTGCTCCAGTCCGCTTGGC	23H-RNA	F55A4.9, rncs-1		0	0	0	0	0	0	0	0	0	0	0		0	0	0	0	0	0		0	0	0	0	0	0	0	0		0	0	0	0	0	0
CACATCATCCTCGCCGCAGCCAT	23H-RNA	Y57G11C.1145_hairpin		0	0	0	0	0	0	0	0	0	0	0		0	0	0	0	0	0		0	0	0	0.25	0	0	0	0		0	0	0	0	0	0
CACCGTCCTGCTGTCAATATCA	23H-RNA	F31C3.9, rrn-3.1		0	0	0	0	0	0	0.06	0	0	0	0		0	0.06	0	0	0	0		0	0	0	0	0	0.12	0.64	0.81		0	0	0	0	0	0
CACGCCATCATCCACATCATCCT	23H-RNA	Y57G11C.1145_hairpin		0	0.06	0	0	0	0	0	0	0	0	0		0	0	0	0	0	0		0	0	0	0	0	0	0	0		0	0	0	0	0	0
CACGGAGTTAAATTTGAATTTT	23H-RNA	Y69A2AR.16_hairpin		0	0	0	0	0	0	0.06	0	0	0	0		0	0.06	0	0	0	0		0	0	0	0	0.2	0	0	0		0	0.05	0	0	0	0
CACGGCAACTCGGTCCAAAACC	23H-RNA	PALNN1		0	0.06	0.06	0.21	0	0	0	0	0	0	0		0	0	0	0	0	0		0	0	0	0	0	0	0	0.1		0	0	0	0.05	0	0
CACGGTGCCAGATCCTGAAAACG	23H-RNA	other		0	0	0	0	0	0	0	0	0	0	0		0	0	0	0	0	0		0	0	0	0	0	0	0	0		0	0	0	0	0	0
CACTTACCAGCACACAGAGACGC	23H-RNA	Y57G11C.51		0	0	0	0	0	0	0.06	0	0	0	0		0	0.06	0	0	0	0		0	0	0	0	0	0	0	0		0	0	0	0	0	0
CAGCACGACGTAGACGGAAAGGA	23H-RNA	H15N14.4		0	0	0	0	0	0	0	0	0	0	0		0	0	0	0	0	0		0	0	0	0	0	0	0	0		0	0	0	0	0	0
CAGCCATCGTCGTCGTCATCCAC	23H-RNA	Y57G11C.1145_hairpin		0.14	0	0	0	0	0	0	0	0	0	0		0	0	0	0	0	0		0	0	0	0	0	0	0	0		0	0	0	0	0	0
CAGCCGGCCCTTACCGTTTAAT	23H-RNA	mir-5592		0	0	0	0	0	0	0	0	0	0	0		0	0	0	0	0	0		0	0	0	0	0	0	0.06	0		0	0	0	0	0	0
CAGCCGGCCCTTACCGTTTAATA	23H-RNA	mir-5592		0	0	0	0	0.17	0	0	0	0	0	0		0	0	0	0	0	0		0	0	0	0	0.1	0	0	0		0	0	0	0.1	0	0
CAGTGGAGTGGATGACGACGACGA	23H-RNA	Y57G11C.1145_hairpin		0	0	0	0	0	0	0	0	0	0	0		0	0	0	0	0	0		0	0	0	0	0	0	0	0		0	0	0	0	0.18	0
CATAACGAGACCGCTGAAAAAGT	23H-RNA	PAL5A		0	0	0	0	0	0	0	0	0	0	0		0	0	0	0	0	0		0	0	0	0	0	0	0	0		0	0	0	0.1	0	0
CATAGGAAATAGATCTAGAACTT	23H-RNA	F58A6.9		0	0	0	0	0	0	0	0	0	0	0		0	0	0	0	0.05	0		0	0	0	0	0	0	0	0		0	0	0	0	0	0
CATCAGCACCAACACCTCACCC	23H-RNA	C36A4.14		0	0	0	0	0	0	0	0	0	0	0		0	0	0	0	0	0		0	0	0	0	0	0	0	0		0	0	0	0	0	0
CATCATCCTCGCCGCAGCCATC	23H-RNA	Y57G11C.1145_hairpin		0	0	0	0	0	0	0	0	0	0	0		0	0	0	0	0.05	0		0	0	0	0	0	0	0	0		0	0	0	0.05	0	0
CATCATCCTCGCCGCAGCCATCGT	23H-RNA	Y57G11C.1145_hairpin		0.14	0	0	0	0	0.07	0	0	0	0	0		0.07	0	0	0	0	0		0	0	0	0	0.1	0	0.09	0		0	0	0	0.05	0	0
CATCGTAAGGCACCCGACACACT	23H-RNA	Y41C4A.17		0	0	0	0	0	0	0	0	0	0	0		0	0	0	0	0	0		0	0	0	0	0	0	0	0		0	0	0	0	0	0
CATGACGGTTTGATCTACAAA	23H-RNA	CELE14B		0	0	0	0	0	0	0	0	0	0	0		0	0	0	0	0	0		0	0	0	0	0	0	0	0		0	0	0	0	0	0
CATGAGATGTCGGCGGCCTGAT	23H-RNA	PALTA3		0	0	0	0	0	0	0	0	0	0	0		0	0	0	0	0	0		0	0	0	0	0	0	0	0		0	0	0	0	0	0
CATGAGATGTCGGCGGCCTGATA	23H-RNA	PALTA3		0	0	0	0	0	0	0	0	0	0	0		0	0	0	0	0	0		0	0	0.13	0	0	0	0	0		0	0	0	0	0	0
CATGTATTAAACGGTAAGGGC	23H-RNA	mir-5592		0	0	0.58	0.43	0.17	0.63	0.47	0.46	0.17	0.11	0.44		0.63	0.47	0.46	0	0.05	0		1.38	1.24	1.39	4.25	4.07	2.95	2.11	2.22		1.24	1.21	1.03	1.3	1.29	0.61
CATGTATTAAACGGTAAGGGCCG	23H-RNA	mir-5592		0	0	0.06	0.28	0.52	0.21	0.12	0.35	0	0	0.15		0.21	0.12	0.35	0	0.24	0		0.83	0.36	0.38	0.5	1.02	1.54	1.1	0.91		0.35	0.35	0.32	0.3	0.55	0.4
CATGTATTAAACGGTAAGGGCCGG	23H-RNA	mir-5592		0	0	0	0	0	0	0	0.06	0	0	0		0	0	0.06	0	0	0		0	0	0	0	0	0	0.09	0		0.18	0	0	0	0	0
CATTTCTACAAGTCTCATGTTGA	23H-RNA	M01E5.3		0	0	0	0	0	0	0	0	0	0	0		0	0	0	0	0	0		0	0	0	0	0	0	0	0		0	0	0	0	0	0
CCAAACTGGATTGACGAGCAT	23H-RNA	F55A4.9, rncs-1		0	0	0	0	0	0	0.06	0	0	0	0		0	0.06	0	0	0	0		0.14	0	0	0	0	0	0	0		0	0	0	0	0	0
CCAAACTGGATTGACGAGCATC	23H-RNA	F55A4.9, rncs-1		0.21	0	0.06	0	0	0	0	0	0	0	0		0	0	0	0	0.05	0.07		0	0	0	0.75	0.2	0	0	0		0	0.05	0	0.05	0	0
CCAAAGGATCACGAGGCTCTTC	23H-RNA	Unknown_IR1		0.07	0.06	0	0.36	0.12	0.49	0.41	0.12	0.52	0.32	0.15		0.49	0.41	0.12	0.35	0.1	0.07		0.14	0.09	0.25	0	0	0.35	0.55	1.31		0.18	0.15	0.32	0.2	0	0
CCAAAGGATCACGAGGCTCTTCC	23H-RNA	Unknown_IR1		0	0.06	0.24	0	0	0	0	0	0	0	0.14		0	0	0	0	0.05	0		0	0	0.12	0	0	0	0	0.1		0	0	0	0.05	0	0.19
CCAAGCGGACTGGAGCACATTGG	23H-RNA	F55A4.9, rncs-1		0.07	0.38	0.06	0.21	0.35	0.14	0.06	0.12	0	0	0		0.14	0.06	0.12	0.07	0.19	0.07		0	0.18	0.13	0.75	0.61	0	0	0		0	0.05	0.13	0.05	0	0
CCAAGCGGACTGGAGCACATTGGA	23H-RNA	F55A4.9, rncs-1		0	0	0	0	0	0	0	0	0	0	0		0	0	0	0	0	0		0	0	0	0	0	0	0	0		0.18	0	0	0	0	0
CCACCGTGTCTGGTCTCCTCGC	23H-RNA	ZK402.3		0.07	0	0	0.21	0.12	0	0.06	0.12	0	0	0		0	0.06	0.12	0	0	0		0	0	0	0	0	0	0	0		0	0	0	0	0	0
CCACGCCATCATCCACATCATCC	23H-RNA	Y57G11C.1145_hairpin		0	0	0	0	0	0	0	0	0	0	0		0	0	0	0	0	0		0	0	0	0	0	0	0	0		0	0	0	0	0	0
CCACGGCGGCCGACAATTTCCGA	23H-RNA	Unknown_hairpin_RE2		0	0	0	0.07	0	0	0	0	0	0	0		0	0	0	0	0	0		0	0	0	0	0	0	0	0		0	0	0	0	0	0
CCAGATCCGGAAAACGTAGATCC	23H-RNA	other		0	0	0	0	0	0	0	0	0	0	0		0	0	0	0	0	0		0	0	0	0	0	0	0	0		0	0	0	0	0	0
CCCCGAACGCAGATTTATTTTT	23H-RNA	T04D3.t1		0	0	0	0	0	0	0	0	0	0	0		0	0	0	0	0	0		0	0	0	0	0	0	0.09	0		0	0	0	0	0	0
CCCGCCCACAGAACTGTGCCTTG	23H-RNA	H15N14.4, H37A05.4, Y24F12A.3, Y24F12A.4		0	0	0	0	0	0	0	0	0	0	0		0	0	0	0	0	0		0	0	0	0	0	0	0	0		0	0	0	0	0	0
CCCGCCCACAGTTCTGTACCTTG	23H-RNA	Y24F12A.3, Y24F12A.4		0	0	0	0	0	0	0	0	0	0	0		0	0	0	0	0	0		0	0	0	0	0	0	0	0		0	0	0	0	0	0
CCCGCCCACGATTTCATTTGC	23H-RNA	mir-5550_RE		0	0	0	0	0	0	0	0	0	0	0		0	0	0	0	0	0		0	0	0	0	0	0	0	0		0	0	0	0	0	0
CCCGTCTAGGTGATCTTTCAACA	23H-RNA	Y37E3.30		0	0	0	0	0	0	0	0	0	0	0		0	0	0	0	0	0		0	0	0	0	0	0	0	0		0	0	0	0	0	0
CCCTTACGATCCTTCTTATCTGA	23H-RNA	Unknown_IR1		0	0	0	0	0	0	0	0	0	0	0		0	0	0	0	0	0		0	0	0	0	0	0	0	0		0	0	0	0	0	0
CCCTTTGTACACACCGCCCGTCG	23H-RNA	F31C3.7, F31C3.8, rrn-1.1, rrn-1.2		0	0.26	0	0	0	0	0	0	0.35	0	0.15		0	0	0	0	0	0		0	0.09	0	0.25	0.31	0.24	0	0		0	0	0	0	0	0
CCGATTATTCTGGAACAAGTAT	23H-RNA	MTCE.7		0	0	0	0	0	0	0	0	0	0	0		0	0	0	0	0	0		0	0	0	0	0	0	0	0		0	0	0	0	0	0
CCGATTTCTGCCCCCCCAAAAT	23H-RNA	PAL8C		0	0	0	0	0	0	0	0	0	0	0		0	0	0	0	0	0		0	0	0	0	0	0	0	0		0	0	0	0	0	0
CCGATTTCTGCCCCCCCAAAATG	23H-RNA	PAL8C		0	0	0.26	0.14	0	0	0	0	0	0	0		0	0	0	0	0	0		0	0	0	0	0	0.24	0	0		0.18	0	0	0	0	0
CCGATTTCTGCCCCCCCAAAATGT	23H-RNA	PAL8C		0	0	0	0	0	0	0	0	0	0	0		0	0	0	0	0	0		0	0	0	0	0	0	0	0		0	0.05	0	0	0	0
CCGCATTTTTTGTAGATCAAAGC	23H-RNA	CELE14B		0	0	0	0	0	0	0	0	0	0	0		0	0	0	0	0	0		0	0	0	0	0	0	0	0		0	0	0	0	0	0
CCGCGCGCCGCTATGTTTAACTC	23H-RNA	PALTA3		0	0	0	0	0	0	0	0	0	0	0		0	0	0	0	0	0		0	0	0	0	0	0	0	0		0	0	0	0	0	0
CCGCGCGCCGCTATGTTTAACTT	23H-RNA	PALTA3		0.07	0	0	0	0	0	0	0	0	0	0		0	0	0	0	0	0		0	0	0	0	0.1	0	0	0		0	0	0	0	0	0
CCGGATGTCTGTCACTCTCTAAC	23H-RNA	Unknown_RE2		0.07	0.13	0	0	0	0.07	0	0	0	0	0		0.07	0	0	0	0	0		0	0	0	0	0	0	0	0.1		0	0	0	0	0	0.2
CCGGCCCTTACCGTTTAATAC	23H-RNA	mir-5592		0	0	0	0.21	0.06	0	0	0.06	0	0	0		0	0	0.06	0	0	0		0	0.09	0	0	0.1	0.24	0.09	0.1		0	0.1	0.13	0.05	0.37	0
CCGGCCCTTACCGTTTAATACA	23H-RNA	mir-5592		0	0	0	0.5	0	0	0	0.06	0	0	0.15		0	0	0.06	0	0.1	0.07		0	0.09	0	0.25	0.31	0.12	0.28	0		0	0.45	0.45	0.4	0.18	0.2
CCGGTCGATGCAATTCTTTTT	23H-RNA	other		0	0.06	0	0	0	0	0	0	0	0	0		0	0	0	0	0.05	0		0	0	0	0	0	0	0	0		0	0	0	0	0	0
CCGTGAGTGGACGAGAAAAAGG	23H-RNA	PALTA3		0	0	0	0	0	0	0	0	0	0	0		0	0	0	0	0	0		0	0	0	0	0	0	0	0		0	0	0	0	0	0
CCTCATACCGCGTATCTATTC	23H-RNA	F47E1.18, linc-22		0	0	0	0	0	0	0	0	0	0	0		0	0	0	0	0	0		0	0	0	0	0	0	0	0		0	0.05	0	0	0	0
CCTCATACCGCGTATCTATTCA	23H-RNA	F47E1.18, linc-22		0	0	0	0	0	0	0	0	0	0	0		0	0	0	0	0	0		0	0	0	0	0	0	0	0		0	0	0	0	0	0
CCTCCCGATAGAATGAATTTTC	23H-RNA	Y57G11C.1144		0	0	0	0	0	0.07	0	0	0	0	0		0.07	0	0	0	0	0		0	0	0	0	0	0	0	0		0	0	0	0	0	0
CCTCGAGAGCGCGACAAAAACT	23H-RNA	W03D2.15		0	0.06	0	0	0	0	0	0	0	0	0		0	0	0	0	0	0		0	0	0	0	0	0	0	0		0	0	0	0	0	0
CCTTACGATCCTTCTTATCTGA	23H-RNA	Unknown_IR1		0	0.06	0	0	0.05	0	0	0	0	0	0		0	0	0	0	0	0		0	0	0	0	0	0	0	0.29		0	0	0	0	0	0
CCTTCGACATCTCTGATAACAA	23H-RNA	F58A4.3, hcp-3		0	0	0	0	0	0	0	0	0	0	0		0	0	0	0	0	0		0	0	0	0	0	0	0	0		0	0	0	0	0	0
CGAAGAGCCGAGAAGAGAGATCA	23H-RNA	ChrIII_hairpin1		0	0	0	0	0	0	0	0	0	0	0		0	0	0	0	0	0		0	0	0	0	0	0	0	0		0	0	0	0	0	0
CGACACGTTCTACGAGGGAATT	23H-RNA	F55A4.9, rncs-1		0	0	0	0	0.12	0	0	0	0	0	0		0	0	0	0.07	0	0		0	0	0	0	0.1	0	0	0		0	0	0	0	0	0
CGACGACGAACGATCGGGATG	23H-RNA	ChrX_intergenic1		0	0.06	0	0	0	0	0	0	0	0	0		0	0	0	0	0.05	0		0	0	0	0	0	0	0.09	0		0	0	0	0	0	0
CGACGACGAACGATCGGGATGGA	23H-RNA	ChrX_intergenic1		0.07	0.06	0	0	0	0	0	0	0	0	0		0	0	0	0	0	0		0	0	0	0	0	0	0	0		0	0	0	0.05	0	0
CGACGACGATGGCTGCGGCGAG	23H-RNA	Y57G11C.1145_hairpin		0	0	0	0.14	0	0	0.06	0	0	0	0		0	0.06	0	0.21	0	0		0	0	0	0	0	0	0	0.1		0	0	0	0	0	0
CGACGATGGCTGCGGCGAGGATGA	23H-RNA	Y57G11C.1145_hairpin		0	0	0	0.14	0	0.07	0	0	0	0	0		0.07	0	0	0	0	0		0	0	0	0	0	0	0	0		0	0.05	0	0	0	0
CGAGGATGATGTGGATGATGG	23H-RNA	Y57G11C.1145_hairpin		0	0	0	0	0	0	0	0	0	0	0		0	0	0	0	0	0		0	0	0	0	0	0	0	0		0	0	0	0	0	0
CGAGGATGATGTGGATGATGGCG	23H-RNA	Y57G11C.1145_hairpin		0	0	0	0	0	0	0	0	0	0	0		0	0	0	0	0	0		0	0	0	0	0	0	0	0		0	0	0	0	0	0
CGATGCTCGTCGATCCAGTTT	23H-RNA	F55A4.9, rncs-1		0	0.26	0.19	0.07	0	0	0	0	0	0	0		0	0	0	0	0	0		0	0	0	0.25	0.1	0	0	0		0	0	0	0	0	0
CGATGCTCGTCGATCCAGTTTGG	23H-RNA	F55A4.9, rncs-1		0.07	0.26	0	0	0	0	0	0.06	0	0	0		0	0	0.06	0.07	0	0		0.28	0	0	0.75	0.41	0	0	0.2		0	0	0.06	0	0	0
CGATGGATTCTTTGGAGCAAC	23H-RNA	F55A4.9, rncs-1		0	0	0	0	0	0	0	0	0	0	0		0	0	0	0	0	0		0	0	0	0.25	0.2	0	0	0.1		0	0	0	0	0	0
CGATGGATTCTTTGGAGCAACCG	23H-RNA	F55A4.9, rncs-1		0	0	0.06	0.07	0	0	0	0.17	0	0	0		0	0	0.17	0	0	0		0	0	0	0	0.2	0	0	0		0	0	0	0	0	0.2
CGATGTTTCTGAGATGTCTTCACA	23H-RNA	F43E2.6		0.07	0	0	0	0	0	0	0	0	0	0		0	0	0	0	0	0		0	0	0	0	0	0	0	0		0	0	0	0	0	0
CGCATTTTTCGTAGATCAAACCG	23H-RNA	CELE14B		0.06	0	0	0	0	0	0	0	0	0	0		0	0	0	0	0	0		0	0	0	0	0	0.1	0	0		0	0	0	0	0	0
CGCATTTTTTGTAGATCAAACCC	23H-RNA	CELE14B		0.14	0	0	0	0	0	0	0	0	0	0		0	0	0	0	0	0		0.14	0	0	0	0	0	0	0		0	0	0	0	0	0
CGCATTTTTTGTAGATCAACGT	23H-RNA	CELE14B		0	0	0	0	0	0	0	0	0	0	0		0	0	0	0	0	0		0	0	0	0	0	0	0	0		0	0	0	0	0	0
CGCCAAACATGGATCAACTGGA	23H-RNA	ZK402.2, ZK402.3, ZK402.5		0	0.06	0	0	0	0.07	0	0	0	0	0		0.07	0	0	0	0	0.07		0.14	0	0	0	0	0	0	0		0	0	0	0.05	0	0
CGCCACGAGCGGTGGAGCCTGCA	23H-RNA	T05E12.8		0	0	0	0	0	0	0	0	0	0	0		0	0	0	0	0	0		0	0	0	0	0	0	0	0		0	0	0	0	0	0
CGCGCCGCTATGTTTAACTCGCA	23H-RNA	PALTA3		0	0	0	0	0	0	0	0	0	0	0		0	0	0	0	0	0		0	0	0	0	0	0	0	0		0	0	0	0	0	0
CGCGCGCCGCTATGTTTAACTCG	23H-RNA	PALTA3		0	0	0	0	0.23	0	0	0	0	0	0		0	0	0	0	0	0		0	0	0	0	0	0	0	0		0	0	0	0	0	0
CGCGGGTGATGACAGAAACGGG	23H-RNA	dnj-27_element		0	0	0	0	0	0.07	0.06	0	0	0	0		0.07	0.06	0	0	0	0		0	0	0	0	0	0	0	0		0	0	0	0	0	0
CGCGTAGGTCTAAATTATTTTG	23H-RNA	other		0	0	0	0	0	0	0	0	0	0	0		0	0	0	0	0	0		0	0	0	0	0	0	0	0		0	0	0	0	0	0
CGGAAACTGAAGCCCCAAAATC	23H-RNA	other		0	0	0	0	0	0	0	0	0	0	0		0	0	0	0	0	0		0	0	0	0	0	0	0	0		0	0	0	0	0	0
CGGACGGGAGCCAAGTTTGCACC	23H-RNA	other		0.02	0	0	0	0	0	0	0	0	0	0		0	0	0	0	0	0		0	0	0	0	0	0	0.03	0		0	0	0	0	0	0
CGGACTGGAGCACATTGGAAAAA	23H-RNA	F55A4.9, rncs-1		0	0	0	0	0	0	0	0	0	0	0		0	0	0	0	0	0		0	0	0	0	0	0	0	0		0	0	0	0	0	0
CGGAGAAATGACGAGAAATGC	23H-RNA	K07C5.13		0	0	0	0	0.06	0	0	0	0	0	0		0	0	0	0	0	0		0	0	0.25	0.25	0.2	0	0	0		0	0.05	0	0.1	0	0
CGGAGCTGAAGGATCAGAACATC	23H-RNA	Unknown_IR1		0	0	0	0	0	0	0	0	0	0	0		0	0	0	0	0	0		0	0	0	0	0	0	0	0		0	0	0	0	0	0
CGGAGTTAAATTTGAATTTTTT	23H-RNA	Y69A2AR.16_hairpin		0	0	0	0	0	0	0	0	0	0	0		0	0	0	0	0	0		0	0	0	0	0	0	0	0		0	0	0	0	0	0
CGGAGTTAAATTTGAATTTTTTA	23H-RNA	Y69A2AR.16_hairpin		0	0	0	0	0	0	0	0	0	0	0		0	0	0	0	0	0		0	0	0	0	0	0	0	0		0	0	0	0	0	0
CGGATGTCTGTCACTCTCTAAC	23H-RNA	Unknown_RE2		0.06	0.06	0	0	0.05	0	0	0	0	0	0		0	0	0	0	0	0.06		0	0	0	0.23	0	0.11	0	0		0	0.05	0	0	0	0
CGGCCCTTACCGTTTAATACA	23H-RNA	mir-5592		0	0	0.06	0.14	0.06	0.28	0.18	0.35	0	0.21	0		0.28	0.18	0.35	0.21	0.24	0		0.97	0.36	0.38	2.25	0.81	0.47	0.83	0.81		1.95	1.51	0.96	1.1	1.11	1.42
CGGCCCTTACCGTTTAATACAT	23H-RNA	mir-5592		0	0	0	0.28	0.58	0	0.06	0	0	0	0.44		0	0.06	0	0	0.33	0.14		0.69	0.18	0.88	1.75	0.92	0.83	0.55	0.3		2.3	2.31	2.7	1.85	1.11	2.02
CGGCCCTTACCGTTTAATACATG	23H-RNA	mir-5592		0	0	1.02	0.64	0.64	0.56	0.36	0.23	0.17	0.53	0		0.56	0.36	0.23	0.78	1.67	1.38		1.66	0.53	0.88	3.25	1.53	1.54	0.55	1.11		3.36	2.47	2.7	1.65	2.4	1.62
CGGCCCTTACCGTTTAATACATGT	23H-RNA	mir-5592		0	0	0	0	0	0	0	0	0	0	0		0	0	0	0	0	0		0	0	0	0	0	0	0.09	0.1		0	0.1	0.32	0.1	0	0
CGGCGAGGATGATGTGGATGATG	23H-RNA	Y57G11C.1145_hairpin		0	0	0	0	0	0	0	0	0	0	0		0	0	0	0	0	0		0	0	0	0	0	0	0	0		0	0	0	0	0	0
CGGCGGCCGACAATTTCCGAGC	23H-RNA	Unknown_hairpin_RE2		0	0	0	0	0	0	0	0	0	0	0		0	0	0	0	0	0		0	0	0	0	0	0	0	0		0	0	0	0	0	0
CGGCGGCCGACAATTTCCGAGT	23H-RNA	Unknown_hairpin_RE2		0	0	0	0	0	0	0	0	0	0	0		0	0	0	0	0	0		0	0	0	0	0	0	0	0		0	0	0	0	0	0
CGGCGGCCGACGATTTCTGAGTT	23H-RNA	F23D12.11		0	0	0	0	0	0	0	0	0	0	0		0	0	0	0	0	0		0	0	0	0	0	0	0	0		0	0	0	0	0	0
CGTAGGATGTCGGCGGCCTGATA	23H-RNA	PALTA3		0	0	0	0	0	0	0	0	0	0	0		0	0	0	0	0	0		0	0	0	0	0	0	0	0		0	0	0	0	0	0
CGTATATTCTCTATTAGTGCTGC	23H-RNA	Unknown_RE6		0	0.12	0	0	0	0	0	0	0	0	0		0	0	0	0	0	0		0	0	0	0	0	0	0	0		0	0	0	0	0	0
CGTATATTCTCTATTAGTGCTGT	23H-RNA	other, ZK792.4		0	0	0	0	0	0	0	0	0	0	0		0	0	0	0	0	0		0	0	0	0	0	0	0	0		0	0	0	0	0	0
CGTATTGCAAGCCACGGTTCTGT	23H-RNA	DNA-8-1		0.07	0	0	0	0	0	0	0	0	0	0		0	0	0	0	0	0		0	0	0	0	0	0	0	0		0	0	0	0	0	0
CGTCCTGCTGTCAATATCAACCA	23H-RNA	F31C3.9, rrn-3.1		0	0	0	0	0	0	0	0	0	0	0		0	0	0	0	0	0		0	0	0	0	0	0	0	0		0	0	0	0	0	0
CGTCGCGGCCGAGCTTCCCAAA	23H-RNA	Y71H2B.5		0	0	0	0	0	0	0	0	0	0	0		0	0	0	0	0	0		0	0	0	0	0	0	0	0		0	0	0	0	0	0
CGTCGTCGTCATCCACTCCACCG	23H-RNA	Y57G11C.1145_hairpin		0	0	0	0	0	0	0	0	0	0	0		0	0	0	0.07	0	0		0.14	0	0	0	0	0	0	0		0	0	0	0	0	0
CGTCTGGTTCAGGGTTGTTTA	23H-RNA	F31C3.11, rrn-2.1		0	0	0	0	0	0.04	0.03	0.09	0	0.05	0		0.04	0.03	0.09	0	0	0		0.14	0.22	0.13	0.13	0.31	0.35	0.28	0.25		0.8	0.65	1.03	0.8	0.65	0.51
CGTGAGATGTCGGCGGCCTGATA	23H-RNA	PALTA3		0	0	0	0	0	0	0	0.05	0	0	0		0	0	0.05	0	0	0.06		0	0	0	0	0	0	0	0		0	0	0.06	0	0	0
CGTGGAAGAAGTTGATGAAGAGG	23H-RNA	Y57G11C.1145_hairpin		0	0	0	0	0	0	0	0	0	0	0		0	0	0	0	0	0		0	0	0	0	0.1	0	0	0		0	0	0	0	0	0
CGTGGCGTGTACTGCAGAAAACC	23H-RNA	PALTA3		0	0	0	0	0	0	0	0	0	0	0		0	0	0	0	0	0		0	0	0	0	0	0	0	0		0	0	0	0	0	0
CGTGTCGCATCTGTCCGAAGTTG	23H-RNA	other, tbc-9, Y45F10A.6		0	0	0	0	0	0	0	0	0	0	0		0	0	0	0	0	0		0	0	0	0	0	0	0	0		0	0	0	0	0	0
CGTGTCGCTTCGTCATCTGATG	23H-RNA	F55A4.9, rncs-1		0	0	0	0	0	0	0	0	0	0	0		0	0	0	0	0	0		0	0	0	0	0	0	0	0.1		0	0	0	0	0	0
CGTGTCGCTTCGTCATCTGATGC	23H-RNA	F55A4.9, rncs-1		0	0	0	0.28	0.06	0	0	0	0	0	0		0	0	0	0.07	0	0		0.14	0	0	0	0.2	0	0.09	0.1		0	0	0.06	0	0	0
CGTTCTACGAGGGAATTGACT	23H-RNA	F55A4.9, rncs-1		0	0	0	0	0	0	0	0	0	0	0		0	0	0	0	0	0		0	0	0	0	0	0	0	0		0	0	0	0	0	0
CTAAATACTGGAGCAGCGCAACC	23H-RNA	F52G3.8		0.14	0.13	0	0	0	0	0	0	0	0	0		0	0	0	0	0.05	0		0.14	0.09	0	0	0	0	0	0		0	0	0	0	0	0
CTAGTCAATTCTCTCGTAGAACG	23H-RNA	F55A4.9, rncs-1		0.07	0	0	0	0	0	0	0	0	0	0		0	0	0	0.07	0.1	0		0	0	0	0	0.1	0	0	0		0	0	0	0	0	0
CTATCTACACTCTCTGTACCGA	23H-RNA	other		0	0	0	0	0	0	0	0	0	0	0		0	0	0	0	0	0.03		0	0	0	0	0	0	0	0		0	0	0	0	0	0
CTATCTACACTCTCTGTACCGG	23H-RNA	Unknown_RE2		0	0	0.19	0	0.23	0	0.18	0.17	0	0	0		0	0.18	0.17	0.07	0.05	0.21		0	0.09	0.25	0	0.1	0	0	0		0	0	0	0	0	0
CTATCTACACTCTCTGTACCGT	23H-RNA	other		0	0	0	0	0	0	0	0	0	0	0		0	0	0	0	0	0		0	0	0	0	0	0	0	0		0	0.05	0	0	0	0
CTCAAAATAATAAAACTGCGT	23H-RNA	PALTA3		0.07	0.06	0	0	0	0	0	0	0	0	0		0	0	0	0	0	0		0	0	0.13	0	0	0	0	0		0	0.05	0.13	0	0.18	0
CTCAAAATCCTGAGCCTCACTCA	23H-RNA	M4.2, puf-4		0	0	0	0	0	0	0	0	0	0	0		0	0	0	0	0	0		0	0	0	0	0	0	0	0		0	0	0	0	0	0
CTCAACAGATCGCAGTATAAAA	23H-RNA	F31C3.10, F31C3.9, rrn-3.1, rrn-3.56		0.28	0.57	0	0	0.17	0	0.06	0	0.7	0.32	0.15		0	0.06	0	0	0	0		0.14	0.53	0.5	0.5	0.61	0.83	1.38	1.01		0	0.1	0	0.05	0	0
CTCAGGATTTTGAGTGAGGCTCA	23H-RNA	M4.2, puf-4		0.02	0	0	0	0	0.01	0	0	0	0.02	0		0.01	0	0	0	0	0		0	0	0	0	0	0.02	0.03	0		0	0	0	0	0	0
CTCATCTCTGATCTTTTCCAATT	23H-RNA	F55A4.9, rncs-1		0.07	0	0	0	0	0	0	0	0	0	0		0	0	0	0.07	0	0		0	0	0	0	0	0	0	0		0	0	0	0	0	0
CTCCAGGTCCATCTACAAACAAC	23H-RNA	K02E2.11		0	0	0.19	0	0	0	0	0	0	0	0		0	0	0	0.07	0	0		0.14	0	0	0	0	0	0	0.1		0	0	0.06	0	0	0
CTCCAGTCCGCTTGGCCAAACT	23H-RNA	F55A4.9, rncs-1		0	0	0	0	0	0	0	0	0	0	0		0	0	0	0	0.05	0		0	0	0	0	0	0	0	0		0	0	0	0	0	0
CTCGAACTCGCGACCTCTAGATC	23H-RNA	irld-17, Y46H3D.4		0	0	0	0	0	0	0	0	0	0	0		0	0	0	0	0.05	0		0	0	0	0	0	0	0	0		0	0	0	0	0	0
CTCGAATCAGTTCAGTCCCGGAT	23H-RNA	F31C3.7, F31C3.8, rrn-1.1, rrn-1.2		0.14	0.13	0	0.28	0	0	0	0.06	0.52	0.11	0		0	0	0.06	0	0.05	0		0	0.18	0.13	0.25	0	0.59	1.01	0.2		0	0	0	0	0	0
CTCGACTTTCCAGTTCTACCAT	23H-RNA	T05E12.10		0	0	0	0	0	0	0	0	0	0	0		0	0	0	0	0	0		0	0	0	0	0	0	0	0		0	0	0	0	0	0
CTCGGAAATTGTCGGCCGCTGTG	23H-RNA	ChrV_unknown_hairpin1, other		0	0.06	0	0	0	0	0	0	0	0	0		0	0	0	0	0	0		0	0	0	0	0	0	0	0		0	0	0	0	0	0
CTCGGCATTCAGAGGCAACTTCT	23H-RNA	npr-34, Y54E2A.1		0	0	0	0	0	0	0	0	0	0	0		0	0	0	0	0	0		0	0	0	0	0	0	0	0		0	0	0	0	0	0
CTCGTAGAACGTGTCGCTTCGTC	23H-RNA	F55A4.9, rncs-1		0	0	0	0	0.03	0	0	0	0	0	0		0	0	0	0	0	0		0	0	0	0	0	0	0	0		0	0	0	0	0	0
CTCGTCGATCCAGTTTGGCCA	23H-RNA	F55A4.9, rncs-1		0	0	0.13	0	0	0	0	0.06	0	0	0		0	0	0.06	0	0	0		0.14	0	0	0	0	0	0	0		0	0	0	0	0	0
CTCGTCGATCCAGTTTGGCCAA	23H-RNA	F55A4.9, rncs-1		0	0.06	0	0	0	0	0	0	0	0	0		0	0	0	0	0	0.07		0	0	0	0	0	0	0	0		0	0	0	0	0	0
CTCTCGTAGAACGTGTCGCTTCG	23H-RNA	F55A4.9, rncs-1		0.07	0.06	0.13	0	0	0	0	0	0	0	0		0	0	0	0.14	0	0		0	0	0	0	0	0	0	0		0	0.05	0.06	0	0	0.2
CTCTCTCTTTCAGCTCAATGCC	23H-RNA	F55A4.9, rncs-1		0	0.06	0.13	0	0.12	0	0	0.12	0	0	0		0	0	0.12	0	0	0		0	0	0	0	0	0	0	0		0	0	0	0	0	0
CTCTTCGAGCGCGTCTTCTTGC	23H-RNA	ChrIII_hairpin1		0	0.06	0	0	0	0	0	0.06	0	0	0		0	0	0.06	0.07	0.05	0.14		0	0	0	0	0	0	0	0		0	0	0	0	0	0
CTCTTCGAGCGCGTCTTCTTTA	23H-RNA	ChrIII_hairpin1		0	0	0	0	0	0	0	0	0	0	0		0	0	0	0	0	0		0	0	0	0	0	0	0	0		0	0	0	0	0	0
CTCTTGCTTCTGTTCCAAATA	23H-RNA	F19B2.5		0	0	0	0	0	0	0	0	0	0	0		0	0	0	0	0	0		0	0	0	0	0	0	0	0		0	0	0	0	0	0
CTCTTGCTTCTGTTCCAAATATG	23H-RNA	F19B2.5		0	0	0	0	0	0	0	0	0	0	0		0	0	0	0	0	0		0	0	0	0	0	0	0	0		0	0	0	0	0	0
CTGAGGATTTTGAGTGAGGCTGA	23H-RNA	M4.2, puf-4		0	0	0	0	0	0	0	0	0	0	0		0	0	0	0	0	0		0	0	0	0	0	0	0	0		0	0	0	0	0	0
CTGCCTGCCCAGAGCTAAGTACC	23H-RNA	T25G12.8		0	0.06	0	0	0	0	0	0.06	0	0	0		0	0	0.06	0	0	0		0	0	0	0	0	0	0	0		0	0	0	0	0	0
CTGCGGCGAGGATGATGTGGATG	23H-RNA	Y57G11C.1145_hairpin		0	0	0	0.28	0	0	0	0	0	0	0		0	0	0	0.07	0	0		0	0	0	0	0	0	0	0.1		0	0	0	0	0	0
CTGTCAATCTATTTTTCGTCTGT	23H-RNA	CTGTCAATCTATTTTTCGTCTGT_Repeat		0	0	0	0	0	0	0.04	0	0	0	0		0	0.04	0	0	0	0		0	0	0	0	0	0	0	0		0	0.03	0.04	0	0	0
CTTCATCTAAGGCTAAATATCGA	23H-RNA	F31C3.9, rrn-3.1		0	0	0	0	0	0.07	0	0	0	0	0		0.07	0	0	0	0	0		0	0	0	0.25	0.1	0.24	0.28	0.71		0	0	0	0.1	0	0
CTTCGTCATCTGATGCGGTTGTTC	23H-RNA	F55A4.9, rncs-1		0	0	0	0	0	0	0	0	0	0	0		0	0	0	0	0	0		0	0	0	0	0.31	0.12	0	0		0	0	0	0	0	0
CTTCTACATCCGTAAGAGGAACC	23H-RNA	Y17D7C.3		0.42	0.19	0	0	0	0.07	0	0	0	0	0		0.07	0	0	0	0	0		0	0	0	0	0	0	0	0.1		0	0	0	0	0	0
CTTCTGATCCTAGATGAACAATG	23H-RNA	24F12A.4, H15N14.4, Y24F12A.3		0	0	0	0	0	0	0	0	0	0	0		0	0	0	0	0	0		0	0	0	0	0	0	0	0		0	0	0	0	0	0
CTTCTTCCACGCCATCATCCAC	23H-RNA	Y57G11C.1145_hairpin		0	0	0	0	0	0	0	0	0	0	0		0	0	0	0	0	0		0	0	0	0	0	0	0	0		0	0	0	0	0	0
CTTGAAAATACTAACCCGGTCA	23H-RNA	ZK1236.8		0	0	0	0	0	0	0	0	0	0	0		0	0	0	0	0	0		0	0	0	0	0	0	0	0		0	0	0	0	0	0
CTTGGACTTTTTCGCTGGTTTGG	23H-RNA	F55A4.9, rncs-1		0.07	0.19	0	0	0	0.14	0	0	0	0	0		0.14	0	0	0.07	0	0		0	0	0	0	0.1	0	0	0.1		0	0	0	0	0	0
CTTTCAGCATCGACCACGGCTTT	23H-RNA	F55A4.9, rncs-1		0	0	0	0	0	0	0	0	0	0	0		0	0	0	0	0	0		0	0	0	0	0	0	0	0		0	0	0	0	0	0
CTTTGAACGGCCCTTAAAACAC	23H-RNA	F31C3.9, rrn-3.1		0	0.06	0	0	0.06	0	0	0	0	0	0		0	0	0	0	0	0		0	0.09	0.13	0.25	0.41	0.24	0.09	0.71		0	0	0	0	0	0
CTTTGCTCTGCGTCCGACACTTT	23H-RNA	VB0395L.1		0	0	0	0	0	0	0	0	0	0	0		0	0	0	0	0	0		0	0	0	0	0	0	0	0		0	0	0	0	0	0
CTTTTGTTTCTCTTCCTCTTGC	23H-RNA	F19B2.5		0	0	0.45	0.28	0.29	0	0	0	0	0	0		0	0	0	0.07	0	0		0	0	0	0	0	0	0	0		0	0	0	0	0	0
CTTTTGTTTCTCTTCCTCTTGCT	23H-RNA	F19B2.5		0	0	0.13	0.43	0.06	0	0	0	0	0	0		0	0	0	0.21	0.05	0.48		0	0	0	0	0	0	0.09	0		0	0	0	0	0	0
GAAAGACTAATCGAACCATCTA	23H-RNA	F31C3.9, rrn-3.1		0	0.13	0.19	0.07	0	0	0	0.12	0	0	0		0	0	0.12	0	0	0		0	0.18	0.38	0.5	0.41	0.12	0.37	0		0	0.2	0	0.4	0	0
GAAGAATGCTGGAACACGTCGT	23H-RNA	Y37E3.30		0.35	0.19	0	0	0	0	0.06	0	0	0.11	0		0	0.06	0	0	0	0		0.14	0	0	0	0	0.12	0	0		0	0.1	0.13	0.05	0.18	0
GAAGAGCCGACATCGAAGGATCA	23H-RNA	F31C3.10, F31C3.9, rrn-3.1, rrn-3.56		0	0	0	0	0.06	0	0.06	0	0.17	0.11	0		0	0.06	0	0	0	0		0.14	0.09	0.13	0	0	1.18	1.47	0.91		0	0	0	0	0	0
GAAGGCGCGCTCGAAGAGCCGAG	23H-RNA	ChrIII_hairpin1		0	0	0	0	0	0.07	0	0	0	0	0.29		0.07	0	0	0.35	0.19	0		0	0	0	0	0	0	0	0		0	0	0	0	0	0
GAAGGCGCGCTCGAAGAGCCGAGA	23H-RNA	ChrIII_hairpin1		0.07	0.06	0	0.14	0.12	0.21	0.41	0.23	0.17	0	0		0.21	0.41	0.23	1.48	0.76	1.1		0	0	0	0	0.1	0	0	0		0	0	0	0.05	0.18	0
GAAGGGCAAAGAGTGCGATATC	23H-RNA	jmjc-1, T28F2.4		0	0	0.06	0	0	0	0	0	0	0	0		0	0	0	0.14	0	0		0	0	0	0	0	0	0	0		0	0	0.13	0.1	0	0
GAATCAGAACACGGGGGCGACA	23H-RNA	hmg-1.1, Y48B6A.14		0.07	0.06	0	0	0.06	0.07	0.12	0.12	0.35	0.32	0		0.07	0.12	0.12	0	0.29	0.07		0	0.18	0.25	0	0.2	0	0	0		0	0.05	0	0	0	0
GAATTGTGAAGACATCTCAGAAA	23H-RNA	F43E2.6		0.07	0.13	0	0	0	0	0.06	0	0	0	0		0	0.06	0	0	0.05	0		0	0.18	0	0	0	0	0.09	0		0	0	0.06	0	0	0
GACCAAGTCGTATGCAAGTGAT	23H-RNA	F31C3.10, F31C3.9, rrn-3.1, rrn-3.56		2.16	1.21	1.15	0.07	0.29	0.28	0.18	0.46	5.05	2.11	2.91		0.28	0.18	0.46	0.35	0.43	0.34		0.14	0.09	0	0	0.1	0	0.09	0		0	0	0	0	0	0
GAGTCGATGAAAGTGGTGGTAT	23H-RNA	F31C3.9, rrn-3.1		0	0	0	0	0	0	0.06	0	0	0	0		0	0.06	0	0	0	0		0.14	0	0	0	0	0.95	0.74	0.2		0	0	0	0	0	0
GAGTGGGGACTGTCGCTTCGA	23H-RNA	F31C3.7, F31C3.8, rrn-1.1, rrn-1.2		0.07	0	0.13	0	0.12	0.07	0	0.06	0	0	0.15		0.07	0	0.06	0.07	0	0.07		0	0.18	0	0	0.31	0.47	0.28	0.3		0.18	0.2	0.19	0.15	0.37	0
GATGATGGCGTGGAAGAAGTTGA	23H-RNA	Y57G11C.1145_hairpin		0.14	0.19	0.19	0.28	0.23	0.42	0.36	0.17	1.22	0.85	0		0.42	0.36	0.17	0.21	0.24	0.55		0.55	0.18	0	0	0.2	0.35	0.83	0		1.24	0.55	1.16	1.2	0.55	1.21
GCAAGCTGCGTTCTTCATCGAT	23H-RNA	F31C3.11, rrn-2.1		1.12	0.57	0.19	1	0.23	0.14	0.06	0.41	1.74	0.85	1.45		0.14	0.06	0.41	0.7	0.48	0.28		0.14	0	0	0	0	0.12	0.09	0.1		0	0	0	0	0	0
GCAAGTGATTTAGCGCCCCGAC	23H-RNA	F31C3.10, F31C3.9, rrn-3.1, rrn-3.56		0.56	0.38	0.64	0.93	0.7	0.77	0.65	0.64	4	2.01	2.91		0.77	0.65	0.64	0.7	0.57	0.62		0.14	0.18	0	0	0.1	0.59	0.37	0.71		0	0	0	0	0	0
GCCCGGTGTTGTACGTAGGTGG	23H-RNA	T05E12.8		0.07	0	0	0	0	0	0	0.06	0	0	0		0	0	0.06	0	0	0		0	0	0	0	0	0	0	0		0	0	0	0	0	0
GCCCTTACCGTTTAATACATGTT	23H-RNA	mir-5592		0	0	0	0	0.12	0	0	0	0	0	0		0	0	0	0	0	0		0	0	0	0	0	0	0	0.1		0.35	0.05	0.13	0	0.18	0
GCCCTTTGTACACACCGCCCGTC	23H-RNA	F31C3.7, F31C3.8, rrn-1.1, rrn-1.2		0	0	0.06	0.36	0	0	0	0	0	0	0.15		0	0	0	0	0	0.21		0	0	0	0	0	0	0	0		0	0	0	0	0	0
GCCGATGTTTCTGAGATGTCTTCA	23H-RNA	F43E2.6		0.07	0.06	0	0	0.17	0	0.06	0.12	0	0	0		0	0.06	0.12	0	0	0.07		0	0	0	0	0	0	0	0.1		0	0	0	0	0	0
GCGCCCCGACATTGAACCAGAG	23H-RNA	F31C3.10, F31C3.9, rrn-3.1, rrn-3.56		0.28	0.13	0.38	0.21	0.23	0.07	0.65	0.17	0.87	0.95	0.44		0.07	0.65	0.17	0.42	0.24	0.28		0.28	0.36	0.13	0	0	0.71	0.55	1.11		0	0	0	0	0	0
GCGGAGATTCACTGGAGATTTG	23H-RNA	lin-5, T09A5.10		0	0	0	0	0	0.07	0.12	0	0	0	0		0.07	0.12	0	0	0	0		0	0	0	0	0	0	0	0		0	0	0.13	0	0.18	0
GCGTGCAGCCCCGGACATCTAA	23H-RNA	F31C3.7, F31C3.8, rrn-1.1, rrn-1.2		0.21	0.26	0.26	0.14	0.41	0	0.12	0.12	0.52	0	0.73		0	0.12	0.12	0.14	0.24	0.07		0	0	0	0	0	1.06	0.46	0.71		0	0	0	0	0	0
GGACCACCGAGACGCATGATA	23H-RNA	Y37E3.30		0	0	0	0	0	0	0	0	0	0	0		0	0	0	0	0	0		0	0	0	0	0	0	0	0		0	0	0	0	0	0
GGAGCTGGACGATGGATTCTT	23H-RNA	F55A4.9, rncs-1		0.03	0	0	0	0	0.14	0.03	0.06	0	0.05	0.44		0.14	0.03	0.06	0.07	0.1	0		0	0.04	0.06	0	0	0.06	0	0		0.09	0.08	0	0.05	0	0.1
GGAGCTGGACGATGGATTCTTTG	23H-RNA	F55A4.9, rncs-1		0	0	0	0	0	0.21	0	0	0	0	0		0.21	0	0	0	0	0		0	0	0.13	0	0	0	0	0		0	0	0	0	0	0
GGAGGGATGCGAAATAAATATTTT	23H-RNA	Y57G11C.36, Y57G11C.51		0	0	0	0	0	0	0	0	0	0	0		0	0	0	0	0	0		0	0	0	0	0	0	0	0		0	0	0	0.05	0	0
GGAGTGGATGACGACGACGATGG	23H-RNA	Y57G11C.1145_hairpin		0.07	0	0	0	0	0.49	0.12	0.12	0	0	0.15		0.49	0.12	0.12	0.07	0.05	0.07		0.28	0.09	0.25	0	0.1	0	0	0.1		0.35	0.1	0.13	0.15	0.37	0.61
GGCCCTTACCGTTTAATACATG	23H-RNA	mir-5592		0	0	0.06	0	0	0	0.06	0	0	0	0		0	0.06	0	0	0.1	0		0	0	0	0.5	0.1	0.12	0.18	0.1		0.71	1.11	0.71	0.3	0.18	0.2
GGCCCTTACCGTTTAATACATGT	23H-RNA	mir-5592		0	0	0.19	0.07	0	0	0	0	0	0	0		0	0	0	0	0	0		0	0.09	0	0	0	0	0	0		0	0.1	0.06	0.05	0	0
GGGAGGAAAGCTGGGATTATCC	23H-RNA	Y37E3.30		0	0	0	0	0	0	0	0	0	0	0		0	0	0	0	0	0		0	0	0	0	0	0	0	0		0	0	0.06	0	0	0
GGGCATCGAGCTGAAAGAGAGAGC	23H-RNA	F55A4.9, rncs-1		0	0	0.06	0	0	0	0	0	0	0	0		0	0	0	0	0	0		0	0	0	0	0	0	0	0		0	0	0	0	0	0
GGGGTATATATGGGTTCTAAGATC	23H-RNA	Y116F11A.1		0.07	0	0	0	0	0	0	0	0	0	0		0	0	0	0	0	0		0	0	0	0	0	0	0	0		0	0	0	0	0	0
GGTGAGGTGTTGGTGCTGATGGCA	23H-RNA	C36A4.14		0	0.06	0	0	0	0	0	0.06	0	0	0		0	0	0.06	0	0	0		0	0	0	0	0	0	0	0		0	0	0	0	0.18	0
GTCGTCGTCATCCACTCCACCG	23H-RNA	Y57G11C.1145_hairpin		0	0	0	0.14	0	0	0	0	0	0.11	0		0	0	0	0.21	0.14	0.34		0	0	0	0	0.2	0	0	0		0.18	0.1	0	0.1	0	0.2
GTCGTCGTCATCCACTCCACCGA	23H-RNA	Y57G11C.1145_hairpin		0	0	0	0	0	0	0	0.06	0	0	0.15		0	0	0.06	0.21	0.19	0.34		0	0.09	0	0	0	0	0.09	0.1		0.35	0.25	0.26	0.15	0	0.81
GTGCCTAACTTCTCGCTCATGA	23H-RNA	F31C3.9, rrn-3.1		0	0	0	0	0	0.07	0	0	0	0	0		0.07	0	0	0	0	0		0	0	0	0	0	0	0.09	0.3		0	0	0	0.15	0	0
GTGGAGCTGGACGATGGATTCTTT	23H-RNA	F55A4.9, rncs-1		0	0	0	0	0	0	0	0	0	0	0		0	0	0	0	0	0		0	0	0	0	0	0	0	0		0	0	0	0	0	0
GTGTAACAATCTATTTTTTCGT	23H-RNA	GTGTAACAATCTATTTTTTCGT_repeat		0.06	0	0.05	0.02	0.09	0	0.02	0.03	0	0	0		0	0.02	0.03	0	0.01	0		0.04	0.12	0.03	0	0	0.03	0	0.05		0.28	0.13	0.24	0.23	0.15	0.43
GTTCTGTGGGCGGGGCCAATCC	23H-RNA	DNA-8-1		0.14	0.25	0.32	0	0.11	0.07	0.06	0.23	0	0.21	0.14		0.07	0.06	0.23	0.14	0	0.14		0	0	0.12	0	0	0	0	0		0	0.1	0.06	0.25	0	0
GTTTCCAGCAGTGTCGTATGTCC	23H-RNA	F31C3.9, rrn-3.1		0	0	0	0	0.12	0.07	0.06	0	0	0	0		0.07	0.06	0	0	0	0		0	0	0	0.25	0	0.12	0	0		0	0	0	0	0	0
GTTTGATCTCCGAGAATTGCGGG	23H-RNA	dnj-27_element		0.06	0	0	0	0.1	0	0	0	0	0	0		0	0	0	0	0	0.06		0	0	0	0	0	0	0	0		0	0	0	0	0	0
TAAAAAATTCAAATTTAACTCCG	23H-RNA	Y69A2AR.16_hairpin		0.07	0.06	0	0	0.12	0	0	0	0	0	0		0	0	0	0	0	0		0.14	0	0	0.25	0.51	0	0	0		0.18	0	0	0.15	0	0
TAAACATAGCGGCGCGCGGAACA	23H-RNA	PALTA3		0	0	0	0.07	0	0	0	0	0	0	0		0	0	0	0	0	0.07		0	0	0	0	0	0	0.09	0		0.35	0.05	0	0.05	0.18	0.2
TAAACGGTAAGGGCCGGCTGG	23H-RNA	mir-5592, R07C3.18, R07C3.19		0	0	0	0.16	0.13	0.11	0	0.04	0	0	0		0.11	0	0.04	0.11	0.32	0.05		0.21	0	0.09	0	0.23	0.09	0.21	0		0	0.04	0	0.04	0.14	0.15
TAAAGACGTGGTTTTGACGAAAA	23H-RNA	other, Y54G11A.1		0	0	0	0	0	0	0	0	0	0	0		0	0	0	0	0	0		0	0	0	0	0	0	0	0		0	0	0	0	0	0
TAAAGTCGATGGACGGCGAGATT	23H-RNA	PALTTAA1		0	0	0	0	0	0	0	0	0	0	0		0	0	0	0	0	0		0	0	0	0.24	0.1	0	0	0		0	0	0	0	0	0
TAACAGGGATGAAGTAACGCC	23H-RNA	other		0	0	0	0	0	0	0	0	0	0	0		0	0	0	0	0	0		0	0	0	0	0	0	0	0		0	0.1	0	0	0	0
TAACAGGGATGAAGTAACGCCA	23H-RNA	other		0	0.06	0	0	0	0	0	0	0	0	0		0	0	0	0	0	0		0	0	0	0	0.1	0	0	0		0	0	0	0	0	0
TAACGAGACCGCTGAAAAAGTC	23H-RNA	W09C5.9		0	0	0	0	0	0	0	0	0	0	0		0	0	0	0	0	0		0	0	0	0	0	0	0	0		0	0	0	0	0	0
TAACGAGACCGCTGAAAAAGTT	23H-RNA	PAL5A		0	0	0	0	0	0	0	0	0	0	0		0	0	0	0	0	0		0	0	0	0	0	0	0	0		0	0	0	0	0	0
TAACGAGACCGCTGAAAAAGTTC	23H-RNA	PAL5A		0	0	0	0	0	0	0	0	0	0	0		0	0	0	0.07	0	0		0	0	0.13	0	0	0	0	0		0	0	0	0	0	0
TAACGAGACCGCTGAAAAAGTTT	23H-RNA	PAL5A		0	0	0	0	0	0	0	0	0	0	0		0	0	0	0	0.05	0		0	0	0	0	0.1	0	0	0		0	0	0	0	0	0
TAATTGGAAAAGATTAGAGATG	23H-RNA	F55A4.9, rncs-1		0	0	0	0	0	0	0	0	0	0	0		0	0	0	0	0	0		0	0	0	0	0	0	0	0		0	0	0	0	0	0
TACATAGATGCCGAGTACAACCC	23H-RNA	E01G4.5		0.07	0	0	0	0	0	0	0	0	0	0		0	0	0	0	0	0		0	0	0.13	0	0	0	0	0		0	0	0	0	0	0
TACCACCACTTTCATCGACTCTT	23H-RNA	F31C3.9, rrn-3.1		0.07	0	0	0	0	0	0	0	0	0	0		0	0	0	0	0	0		0	0	0	0.25	0	0	0	0		0	0	0	0	0	0
TACCGTACCCCGAAAACTAGAA	23H-RNA	ChrIII_hairpin2		0	0	0	0	0	0	0	0	0	0	0		0	0	0	0	0	0		0	0	0	0	0	0	0	0		0	0.05	0	0	0	0
TACCTGATTTTCATAACGAGACC	23H-RNA	PAL5A		0	0	0	0	0	0	0	0	0	0	0		0	0	0	0	0	0		0	0	0	0	0	0	0	0		0	0	0	0	0	0
TACGAGGGAATTGACTAGTTTCA	23H-RNA	F55A4.9, rncs-1		0	0	0	0.07	0	0	0	0	0	0	0		0	0	0	0	0	0		0	0	0	0	0	0	0	0		0	0	0	0	0	0
TACGGGAAAAGCAGAGAGGCCA	23H-RNA	F39E9.7		0	0	0	0	0	0.14	0	0	0	0	0		0.14	0	0	0.07	0	0		0	0	0	0	0	0	0	0		0	0.05	0	0	0	0
TACTGTAGCGCTGGTGTCGATTT	23H-RNA	other		0	0	0	0	0	0	0	0	0	0	0		0	0	0	0	0	0		0	0	0	0	0	0	0	0		0	0	0	0	0	0
TACTGTAGCGCTTGTGTCGATT	23H-RNA	CELE1		0	0	0	0	0	0	0	0	0	0	0		0	0	0	0	0.04	0		0	0	0	0	0	0	0	0		0	0.04	0	0.04	0.16	0
TACTGTAGCGCTTGTGTCGATTT	23H-RNA	CELE1		0	0	0	0	0	0	0	0	0	0	0		0	0	0	0.06	0	0		0.12	0	0	0	0	0	0	0		0	0	0	0	0	0
TAGAACGTGTCGCTTCGTCATCTG	23H-RNA	F55A4.9, rncs-1		0	0	0	0	0	0	0	0	0	0	0		0	0	0	0	0	0		0	0	0	0	0	0	0	0		0	0	0	0	0	0
TAGATCAAACCGTCATGGGAC	23H-RNA	CELE14B		0	0.06	0.11	0.19	0	0	0	0	0	0	0		0	0	0	0	0.21	0.12		0.12	0	0.11	0	0	0	0.16	0		0	0.04	0	0	0	0
TAGATCAAACCGTCATGGGACA	23H-RNA	CELE14B		0	0	0	0.14	0.35	0	0.06	0.06	0	0	0		0	0.06	0.06	0.07	0.14	0.28		0	0.09	0	0.75	0.1	0	0.18	0		0	0.1	0.26	0.05	0	0
TAGCCTGAGTCTCAACCAAAAC	23H-RNA	hpo-13, Y105E8A.10		0	0	0	0	0.17	0	0	0	0	0	0		0	0	0	0	0	0		0	0	0	0	0	0	0	0		0	0	0	0	0	0
TAGCGAAAACTACAGTAAGAACT	23H-RNA	PALTA4		0	0	0	0	0	0	0	0	0	0	0		0	0	0	0	0	0		0	0	0	0	0	0	0	0		0	0	0	0	0	0
TAGCGAAAACTACAGTAATTCTT	23H-RNA	CELE1		0	0	0	0	0	0	0	0	0	0	0		0	0	0	0	0	0		0	0	0	0	0	0.1	0	0		0	0	0	0	0	0
TAGGATAATGTCTGGAAATACGG	23H-RNA	B0281.4		0	0.06	0	0	0	0	0	0	0	0	0		0	0	0	0	0	0		0	0	0	0	0	0	0	0		0	0	0	0	0	0
TAGGGGAAAAGATGTTGAATG	23H-RNA	other		0	0	0	0	0	0	0	0	0	0	0		0	0	0	0	0	0		0	0	0	0	0	0	0	0		0	0	0	0	0	0
TAGTTTGTAGCCTGAGCCTCAAC	23H-RNA	other		0	0.06	0	0	0	0	0	0	0	0	0		0	0	0	0	0	0		0	0	0	0	0	0	0	0		0	0	0	0	0	0
TATCAGGCCGCCGACATCTCATG	23H-RNA	PALTA3		0	0	0	0	0	0	0	0	0	0	0		0	0	0	0	0	0		0	0	0	0	0	0	0	0		0	0	0	0	0	0
TATCCACGACGGCCGACAATTTCC	23H-RNA	Unknown_hairpin_RE2		0	0	0	0	0	0	0	0	0	0	0		0	0	0	0	0	0		0	0	0	0	0	0	0	0		0	0	0	0	0	0
TATCCACTGAGCTATCCATGC	23H-RNA	irld-17, Y46H3D.4		0	0	0	0	0	0	0	0	0	0	0		0	0	0	0	0	0		0	0	0	0	0	0	0	0		0	0	0	0	0	0
TATGTTTAACTCGCAGCGGGCA	23H-RNA	other		0.07	0	0	0	0	0	0	0	0	0	0		0	0	0	0	0	0		0	0	0	0	0	0	0	0		0	0	0	0	0	0
TATTAAACGGTAAGGGCCGGCT	23H-RNA	mir-5592		0	0	2.43	2.35	2.09	2.11	1.84	2.55	1.22	0.74	1.89		2.11	1.84	2.55	1.27	2.71	2.48		5.24	5.95	3.66	7	7.74	7.21	7.99	7.37		4.42	2.37	3.34	1.45	0.92	2.63
TATTAAACGGTAAGGGCCGGCTG	23H-RNA	mir-5592		0	0	9.15	7.98	8.41	3.23	3.56	2.79	1.92	1.06	1.31		3.23	3.56	2.79	5.29	6.09	4.62		5.65	5.42	3.41	9.25	9.37	7.91	5.79	7.17		2.3	2.01	2.63	1.35	2.22	1.82
TATTAAACGGTAAGGGCCGGCTGG	23H-RNA	mir-5592		0	0	0.06	0.07	0.06	0.07	0.06	0	0	0	0		0.07	0.06	0	0.07	0	0		0.14	0.18	0.13	0	0.2	0.12	0.09	0.1		0.35	0.1	0.13	0.05	0	0
TATTGAAAATGTGGGATGACGC	23H-RNA	E01G4.7		0	0	0	0	0	0	0	0	0	0	0		0	0	0	0	0	0		0	0	0	0	0	0	0	0		0	0	0	0	0	0
TATTTGGAACAGAAGCAAGAGG	23H-RNA	F19B2.5		0	0	0	0	0	0	0	0	0	0	0		0	0	0	0	0	0		0	0	0	0	0	0	0	0		0	0	0	0	0	0
TATTTGGAACAGAAGCAAGAGGA	23H-RNA	F19B2.5		0	0	0	0	0	0	0	0	0	0	0		0	0	0	0	0	0		0	0	0	0	0	0	0	0		0	0	0	0	0	0
TCAAAATTTGACGGTGATTTCAA	23H-RNA	PALTTAA1		0.06	0	0	0	0	0	0	0	0	0	0		0	0	0	0	0	0		0	0	0	0	0	0	0	0		0	0	0	0	0	0
TCAAACATTCGGCAATGGGGTA	23H-RNA	Y37E3.30		0	0.06	0	0	0	0	0	0.06	0	0	0		0	0	0.06	0	0	0		0	0	0	0	0	0	0	0		0	0.05	0	0	0	0
TCAACTTCTTCCACGCCATCATC	23H-RNA	Y57G11C.1145_hairpin		0	0	0	0	0	0	0	0	0	0	0		0	0	0	0	0	0		0	0	0	0	0	0	0	0		0	0	0	0	0	0
TCAATAAAAACAATGGACAACTG	23H-RNA	Y59H11AR.6		0	0	0	0	0	0	0	0	0	0	0		0	0	0	0	0	0		0	0	0	0	0	0	0	0		0	0	0	0	0	0
TCACGAGGGACGAGGAAAAGTG	23H-RNA	PAL5A		0	0	0	0	0	0	0	0	0	0	0		0	0	0	0	0	0		0.13	0	0	0	0	0	0	0		0	0	0	0	0	0
TCACGCATTTTTTGTAGATCAAA	23H-RNA	other, Y57A10A.1		0	0	0	0	0	0	0	0	0	0	0		0	0	0	0	0	0		0	0	0	0	0	0	0	0		0	0	0	0	0	0
TCACGGAGTTAAATTTGAATTTTT	23H-RNA	Y69A2AR.16_hairpin		0	0.06	0	0	0	0	0	0	0	0	0		0	0	0	0	0	0		0	0	0	0	0.31	0	0	0		0	0.05	0.06	0.05	0	0
TCACGGCAACTCGGTCCAAAACC	23H-RNA	PALNN1		0	0.06	0	0	0	0	0	0	0	0	0		0	0	0	0	0	0		0	0	0	0	0	0	0	0		0	0	0	0	0	0
TCACGGGGAAAAGGCAAAATTCG	23H-RNA	PALTA3		0	0	0	0	0.17	0	0	0	0	0	0		0	0	0	0	0	0		0	0	0	0	0	0	0	0		0	0	0	0	0	0
TCACGTCATTATGTCACAATCCC	23H-RNA	F39F10.4		0	0	0	0	0	0	0	0	0	0	0		0	0	0	0	0	0		0	0	0	0	0	0	0	0		0	0	0	0	0	0
TCACTGTTGCGGATGGTCCAGG	23H-RNA	F57G8.14, F57G8.15, linc-59		0	0	0	0	0	0	0	0	0	0	0		0	0	0	0	0	0		0	0	0	0	0	0	0	0		0	0	0	0	0	0
TCAGAAACATCGGCAAATGGC	23H-RNA	F43E2.6		0	0	0	0	0	0	0	0	0	0	0		0	0	0	0	0	0		0	0	0	0	0	0	0	0		0	0	0	0	0	0
TCAGCGGTCTCGTTATGAAAATC	23H-RNA	PAL5A		0	0.13	0	0	0	0	0	0	0	0	0		0	0	0	0	0	0		0	0	0	0	0	0	0	0		0	0	0	0	0	0
TCAGGCCGCCGACATCCTACGGG	23H-RNA	PALTA3		0	0	0	0	0	0	0	0	0	0	0		0	0	0	0	0	0		0	0	0	0	0	0	0	0		0	0	0	0	0	0
TCAGGCCGCCGACATCTCACGGG	23H-RNA	PALTA3		0	0	0	0	0	0	0	0	0	0	0		0	0	0	0	0	0		0	0	0	0	0	0	0	0		0	0	0	0	0	0
TCAGGCCGCCGACATCTCATGGA	23H-RNA	Y105C5B.11		0	0	0	0	0	0	0	0	0	0	0		0	0	0	0	0	0		0	0	0	0	0	0	0	0		0	0	0	0	0	0
TCATCAGCTCCATCAACACCA	23H-RNA	C36A4.14		0	0	0	0	0	0	0	0	0	0	0		0	0	0	0	0	0		0	0	0	0	0	0	0	0		0	0	0	0	0	0
TCATCAGCTCCATCAACACCACCA	23H-RNA	C36A4.14		0	0	0	0	0	0	0	0	0	0	0		0	0	0	0	0	0		0	0	0	0	0	0	0	0		0	0	0	0	0	0
TCATCCTCGCCGCAGCCATCGT	23H-RNA	Y57G11C.1145_hairpin		0.28	0	0	0	0	0	0	0	0	0	0		0	0	0	0	0	0		0	0	0	0	0	0	0	0		0	0	0	0	0	0
TCATCTAAACAACCGTACTGGA	23H-RNA	F31C3.9, rrn-3.1		0	0	0	0	0	0	0	0	0	0	0		0	0	0	0	0	0		0.14	0	0.13	0	0	0.12	0.18	0.71		0	0	0	0	0	0
TCATCTAAGGCTAAATATCGA	23H-RNA	F31C3.9, rrn-3.1		0	0	0	0	0	0	0	0	0	0	0		0	0	0	0	0	0		0	0	0.13	0	0	0.12	0	0		0	0.05	0	0.05	0.18	0
TCATCTCAACCAAGATCTCAAC	23H-RNA	F52D2.6		0	0	0	0	0	0	0	0	0	0	0		0	0	0	0	0	0		0	0	0	0	0	0	0	0		0	0	0	0	0	0
TCATCTCTGATCTTTTCCAAT	23H-RNA	F55A4.9, rncs-1		0	0	0	0.14	0	0	0	0	0	0	0		0	0	0	0	0	0		0	0	0	0	0	0	0.09	0		0	0	0	0	0	0
TCATCTCTGATCTTTTCCAATT	23H-RNA	F55A4.9, rncs-1		0	0	0.38	0	0	0.07	0	0.06	0	0	0		0.07	0	0.06	0	0	0		0	0	0	0.25	0	0	0.09	0.1		0	0	0.06	0.05	0	0
TCATCTCTGATCTTTTCCAATTC	23H-RNA	F55A4.9, rncs-1		0	0.06	0	0	0.06	0	0	0.06	0	0	0		0	0	0.06	0	0	0		0	0	0.13	0	0	0	0	0		0	0	0	0.05	0	0
TCATGATTTATTGTTCCCGTAAT	23H-RNA	PALTA4		0	0	0	0	0	0	0	0	0	0	0		0	0	0	0	0	0		0	0	0	0	0	0	0	0		0.16	0.05	0	0	0	0
TCATGCGTCTCGGTGGTCCGA	23H-RNA	Y37E3.30		0.14	0	0	0	0	0	0	0	0	0	0		0	0	0	0	0	0		0	0	0	0	0	0	0	0		0	0	0	0	0	0
TCCACATCATCCTCGCCGCAGCC	23H-RNA	Y57G11C.1145_hairpin		0	0	0	0	0	0	0	0	0	0	0		0	0	0	0	0	0		0	0	0	0	0	0	0	0		0	0	0	0	0	0
TCCACGCCATCATCCACATCATCC	23H-RNA	Y57G11C.1145_hairpin		0	0	0	0	0	0	0	0	0	0	0		0	0	0	0	0	0		0	0	0	0	0	0	0	0		0	0.05	0	0	0	0
TCCACGGCGGCCGACAATTTC	23H-RNA	Unknown_hairpin_RE2		0	0	0	0	0	0	0	0	0	0	0		0	0	0	0	0	0		0	0	0	0	0.1	0	0	0		0	0	0	0	0	0
TCCACGGCGGCCGACAATTTCC	23H-RNA	Unknown_hairpin_RE2		0.07	0	0.06	0.35	0.06	0	0	0.06	0	0	0		0	0	0.06	0	0	0		0	0	0	0	0	0	0	0		0.17	0	0	0	0	0.2
TCCACGGCGGCCGACAATTTCCG	23H-RNA	Unknown_hairpin_RE2		0	0.06	0	0.07	0	0	0	0	0	0	0		0	0	0	0	0	0		0	0	0	0	0	0	0	0		0	0	0	0	0	0
TCCCACGATTTCATTTGCACTG	23H-RNA	Unknown_RE7		0	0	0	0	0	0	0	0	0	0	0		0	0	0	0	0	0		0	0	0	0	0	0	0	0		0	0	0	0	0	0
TCCCGCATTTCTTGTAGATCAAA	23H-RNA	CELE14B		0.07	0	0	0	0	0	0	0	0	0	0		0	0	0	0	0	0		0	0	0	0	0	0	0	0		0	0	0	0	0	0
TCCCGCATTTCTTGTAGATCACA	23H-RNA	H24K24.4, trm-2A		0.07	0	0	0.28	0	0	0	0	0	0	0		0	0	0	0	0	0		0	0	0	0	0	0	0	0		0	0.05	0	0	0	0
TCCCGCATTTTTCGTAGATCAAA	23H-RNA	CELE14B		0	0	0	0	0	0	0	0	0	0	0		0	0	0	0	0	0		0	0	0.07	0	0	0	0	0		0	0	0	0	0	0
TCCCGCATTTTTGTAGATCACA	23H-RNA	CELE14B		0.16	0.03	0	0.03	0	0	0	0.05	0	0	0		0	0	0.05	0	0	0		0	0	0	0	0	0	0.04	0		0	0	0	0	0	0
TCCCGCATTTTTTGTAGATCACA	23H-RNA	CELE14B		0	0	0	0	0	0	0	0	0	0	0		0	0	0	0	0	0		0	0	0	0	0	0	0	0		0	0	0	0	0	0
TCCCGCATTTTTTGTAGATCAGA	23H-RNA	CELE14B		0	0	0	0	0	0	0	0	0	0	0		0	0	0	0	0	0		0	0	0	0	0	0	0	0		0	0	0	0	0	0
TCCCGGATGTCTGTCACTCTCT	23H-RNA	Unknown_RE2		0	0	0	0	0	0	0	0	0	0	0		0	0	0	0	0.05	0		0	0	0	0	0	0	0	0		0	0	0	0	0	0
TCCGAACAAAAGAGTAACTATT	23H-RNA	other		0	0	0	0	0	0	0	0	0	0	0		0	0	0	0	0	0		0	0	0	0	0	0	0	0		0	0	0	0	0	0
TCCGATTTCTGCCCCCCAAAAT	23H-RNA	PAL8C		0	0	0	0	0	0	0	0	0	0	0		0	0	0	0	0	0		0	0	0	0	0	0	0	0		0	0	0	0	0	0
TCCGATTTCTGCCCCCCAAAATG	23H-RNA	PAL5A		0	0	0	0	0	0	0	0	0	0	0		0	0	0	0	0	0		0	0	0	0	0	0	0	0		0	0	0	0	0	0
TCCGATTTCTGCCCCCCCAAA	23H-RNA	PAL8C		0	0	0.13	0.07	0	0	0	0	0	0	0		0	0	0	0	0	0		0	0	0	0	0.1	0.12	0	0		0	0.05	0	0.05	0	0
TCCGATTTCTGCCCCCCCAAAA	23H-RNA	PAL8C		0	0	0	0	0	0	0	0	0	0	0		0	0	0	0	0	0		0	0	0	0	0	0	0	0		0	0	0.06	0	0	0
TCCGATTTCTGCCCCCCCAAAAT	23H-RNA	PAL8C		0	0	0	0	0	0	0	0	0	0	0		0	0	0	0	0.05	0		0	0	0	0	0	0	0	0		0	0	0	0	0	0
TCCGATTTCTGCCCCCCCAAAATG	23H-RNA	PAL8C		0	0	0.7	0.78	0.75	0.07	0.06	0.17	0	0	0		0.07	0.06	0.17	0	0	0		0	0.09	0.25	0	0.2	0.24	0.18	0.3		0.53	0.3	0.13	0.4	0.55	0.4
TCCGCGCACCGCTATGTTTAACT	23H-RNA	other, Y64G10A.10		0	0	0	0	0	0	0	0	0	0	0		0	0	0	0	0	0		0	0	0	0	0	0	0	0		0	0	0	0	0	0
TCCGCGCGCCGCTACGTTTAACT	23H-RNA	other, Y105C5A.15		0	0	0	0	0	0	0	0	0	0	0		0	0	0	0	0	0		0	0	0	0	0	0	0	0		0	0	0	0	0	0
TCCGCGCGCCGCTATGTTTAACTT	23H-RNA	PALTA3		0	0	0	0	0	0	0	0	0	0	0		0	0	0	0	0	0		0	0	0	0	0	0	0	0		0	0	0	0	0	0
TCCGCGCGCCGCTGCGTTTAACT	23H-RNA	PALTA3		0.07	0	0	0	0	0	0	0	0	0	0		0	0	0	0	0	0		0	0	0	0	0	0	0	0		0	0	0	0	0	0
TCCGCGCGCCGCTGTGTTTAACT	23H-RNA	other		0	0	0	0	0	0	0	0	0	0	0		0	0	0	0	0	0		0	0	0	0	0	0	0	0		0	0	0	0	0	0
TCCGCGCGTCGCTATGTTTAACT	23H-RNA	PALTA3		0.07	0	0	0	0	0	0	0	0	0	0		0	0	0	0	0	0		0	0	0.13	0	0	0	0	0		0	0	0	0	0	0
TCCGGCGTCCCTTTTGTAGAAAA	23H-RNA	mtd-1, other, ZK337.5		0	0	0	0	0	0	0	0	0	0	0		0	0	0	0	0	0		0	0	0	0	0	0	0	0		0	0	0	0	0	0
TCCGTCAGTCTTTTGTGAACAA	23H-RNA	dnj-12, F39B2.10		0	0	0	0	0	0	0	0	0	0	0		0	0	0	0	0	0		0	0	0	0	0	0	0	0		0	0	0	0	0	0
TCCGTGTCACATCTGTCCGAA	23H-RNA	PALTTAA3		0	0	0	0	0.11	0	0	0	0	0	0		0	0	0	0	0	0		0	0	0	0	0	0	0	0		0	0	0	0	0	0
TCCGTGTCACATCTGTCCGAAAT	23H-RNA	other		0	0	0	0	0	0	0	0	0	0	0		0	0	0	0	0	0		0	0	0	0	0	0	0	0		0	0	0	0	0	0
TCCTCAGCCTCACTTAAACTCTT	23H-RNA	M4.2, puf-4		0	0	0	0	0	0	0	0	0	0	0		0	0	0	0	0	0		0	0	0	0	0	0	0	0		0	0	0	0	0	0
TCCTCATCTCTGATCTTTTCCA	23H-RNA	F55A4.9, rncs-1		0	0	0	0	0.12	0	0.06	0	0	0	0		0	0.06	0	0	0	0		0	0	0	0	0	0	0	0		0	0	0	0	0	0
TCCTCGGTCTTGACGAAATCCC	23H-RNA	C36A4.14		0.07	0	0	0	0.06	0	0	0	0	0	0		0	0	0	0	0	0		0	0	0	0	0	0	0	0		0	0	0	0	0	0
TCGACAACTAATTCCCGAATCTC	23H-RNA	T05E12.8		0.7	0.38	0	0	0.06	0	0.06	0.12	0	0	0		0	0.06	0.12	0.14	0.05	0		0	0.18	0	0	0	0	0.09	0		0	0.05	0	0.05	0	0
TCGACACATTGATCATGCTGATA	23H-RNA	other		0.07	0	0	0	0	0	0.06	0	0	0	0		0	0.06	0	0	0.05	0		0	0	0	0	0	0	0	0		0	0	0	0	0	0
TCGCGACCAGCCCTGCGTCTTGC	23H-RNA	Y57G11C.51		0	0	0	0	0	0	0	0	0	0	0		0	0	0	0.07	0	0.07		0	0	0	0	0	0	0	0		0	0	0	0	0	0
TCGCGTAGATCACATGTAGATCA	23H-RNA	pcp-4, Unknown_RE8, Y116F11B.3, Y15E3A.3, Y6B3B.7, Y6B3B.9		0	0	0	0	0	0	0	0	0	0	0		0	0	0	0.07	0	0		0	0	0	0	0	0	0	0		0	0	0	0	0	0
TCGGAAACTGAAGCCCCAAAATC	23H-RNA	other		0	0	0	0	0	0	0	0	0	0	0		0	0	0	0	0	0		0	0	0	0	0	0	0	0		0	0	0	0	0	0
TCGGGGACCAACCAATATCAGGT	23H-RNA	C34G6.1, H05C05.2, hpo-27		0	0	0	0	0	0	0	0	0	0	0		0	0	0	0	0	0.07		0	0	0	0	0	0.12	0	0		0	0	0	0	0	0
TCGGGGGATGTCCAATTGGGGG	23H-RNA	DNA-8-1		0	0	0	0	0	0	0	0	0	0	0		0	0	0	0	0	0		0	0	0	0	0	0	0	0		0	0	0	0	0	0
TCGTATGATGCAAGTGGAATTT	23H-RNA	F52D2.6		0	0.13	0	0	0	0	0	0	0	0	0		0	0	0	0	0	0		0	0	0	0	0	0	0	0		0	0	0	0	0	0
TCGTTGATTTAAGTAGATTTATG	23H-RNA	Y71F9AL.1_hairpin		0.05	0	0	0	0	0	0	0	0	0	0		0	0	0	0	0	0		0	0.06	0	0	0	0	0	0		0	0	0	0	0	0
TCTACAGAAGGGACGCCGGAAA	23H-RNA	other		0	0	0	0	0	0	0	0	0	0	0		0	0	0	0	0	0		0	0	0	0	0	0	0	0		0	0	0	0	0	0
TCTCAGAAACATCGGCAAATG	23H-RNA	F43E2.6		0.14	0.06	0	0	0	0	0.12	0.06	0	0	0		0	0.12	0.06	0	0.1	0.28		0	0.09	0	0.75	0.1	0	0	0		0	0	0.06	0.1	0	0
TCTCGCCGTCCATCGACTTTAA	23H-RNA	PALTTAA1		0	0	0	0.14	0	0	0	0	0	0	0		0	0	0	0	0	0		0	0	0.12	0	0	0	0	0.1		0	0	0	0	0	0
TCTCGCCGTCCATCGACTTTAAA	23H-RNA	PALTTAA1		0	0.06	0.12	0	0	0	0	0	0	0	0		0	0	0	0	0	0		0	0	0	0	0.1	0	0	0		0	0	0	0	0	0
TCTCGCCGTCCATGGACTTTAAA	23H-RNA	other		0	0	0	0	0	0	0	0	0	0	0		0	0	0	0	0	0		0	0	0	0	0	0	0	0		0	0	0	0	0	0
TCTCGTAGAACGTGTCGCTTCGT	23H-RNA	F55A4.9, rncs-1		0	0.06	0.13	0	0.12	0	0.06	0.12	0	0	0		0	0.06	0.12	0	0	0		0	0	0	0	0	0	0	0.1		0	0	0	0	0	0
TCTCGTTCCAATTCAACTCCAGA	23H-RNA	T05E12.10		0.14	0	0	0	0	0	0	0.06	0	0	0		0	0	0.06	0	0	0		0	0	0	0	0	0	0.09	0.1		0	0	0	0	0	0
TCTCTCGTAGAACGTGTCGCTTCG	23H-RNA	F55A4.9, rncs-1		0.07	0	0.13	0	0	0	0	0.06	0	0	0		0	0	0.06	0	0.05	0		0	0	0	0	0.2	0.12	0	0		0	0	0	0	0	0
TCTCTGTGTGCTGGTAAGTGGA	23H-RNA	Y57G11C.51		0.21	0.06	0	0	0	0	0	0.06	0	0	0		0	0	0.06	0	0	0		0	0	0	0	0	0.12	0	0		0	0.05	0.13	0.1	0	0
TCTGCAACTGCCGCACGGTTTT	23H-RNA	DNA-8-1		0.07	0	0	0	0	0	0	0	0	0	0		0	0	0	0	0	0		0	0	0	0	0	0	0	0		0	0	0	0.05	0	0
TCTGTCACTCTCTAACTATCTAC	23H-RNA	Unknown_RE2		0	0	0	0	0	0	0	0	0	0	0		0	0	0	0	0	0		0	0	0	0.25	0	0	0	0		0	0	0	0	0	0
TCTTACTGTAGTTTTCGCTAAG	23H-RNA	PALTA4		0.04	0	0	0	0.03	0	0.1	0	0	0	0		0	0.1	0	0	0	0		0	0	0	0	0	0	0	0.06		0	0	0	0	0	0
TCTTCCACGCCATCATCCACATC	23H-RNA	Y57G11C.1145_hairpin		0	0	0	0	0	0	0	0	0	0	0		0	0	0	0	0	0		0	0	0	0	0	0	0	0		0	0	0	0	0	0
TCTTCTCGGCTCTTCGAGCGCGTC	23H-RNA	ChrIII_hairpin1		0.07	0	0	0	0	0	0	0	0	0	0		0	0	0	0	0.1	0		0	0	0	0	0	0	0	0		0	0	0	0	0	0
TCTTGCTTCTGTTCCAAATATG	23H-RNA	F19B2.5		0	0	0	0	0	0	0	0	0	0	0		0	0	0	0	0	0		0	0	0	0	0	0	0	0		0	0	0	0	0	0
TCTTGCTTCTGTTCCAAATATGC	23H-RNA	F19B2.5		0	0	0.19	0.07	0	0	0	0.06	0	0	0		0	0	0.06	0.07	0.1	0.07		0	0	0	0.25	0	0	0	0.1		0	0	0.06	0	0.18	0
TGAAAGAGAGAGCAGAACAGCG	23H-RNA	F55A4.9, rncs-1		0	0	0	0	0.06	0	0	0	0	0	0		0	0	0	0	0	0		0.14	0	0	0	0	0	0	0		0	0	0.06	0	0	0
TGAAAGGATCGGGACGATTAGGA	23H-RNA	ChrX_intergenic1		0	0	0	0	0	0	0	0	0	0	0		0	0	0	0	0	0		0	0	0	0	0	0	0	0		0	0	0	0	0	0
TGAAATCGTGGGAGGGGCTTAAA	23H-RNA	Unknown_RE7		0	0	0	0	0	0	0	0	0	0	0		0	0	0	0	0	0		0	0	0	0	0	0	0	0		0	0	0	0	0	0
TGAAATCGTGGGCGGGGCTTAAA	23H-RNA	mir-5550_RE		0	0.06	0	0	0	0	0	0	0	0	0		0	0	0	0	0	0		0	0	0	0	0	0	0	0		0	0	0	0	0	0
TGACATGGAGATTAGATAACA	23H-RNA	Y37E11B.2		0.14	0	0.13	0	0	0	0	0	0	0	0		0	0	0	0	0	0		0	0	0	0	0	0	0	0		0	0	0	0	0	0
TGACGACGACGATGGCTGCGGC	23H-RNA	Y57G11C.1145_hairpin		0	0.13	0	0	0	0	0.06	0	0	0	0		0	0.06	0	0	0	0		0	0	0	0	0	0.12	0.09	0		0	0	0	0	0	0
TGAGAACCCCAAATCTACGGACC	23H-RNA	TC5A		0	0	0	0	0	0	0	0	0	0	0		0	0	0	0	0	0.07		0	0	0	0	0	0	0	0		0	0	0	0	0	0
TGAGACATGGTATCGAGATATG	23H-RNA	Y37E11B.2		0	0.13	0	0	0	0	0	0	0	0	0		0	0	0	0	0	0		0	0	0	0	0	0	0	0		0	0	0	0.05	0	0.2
TGAGATGTCGGCGGCCTGATA	23H-RNA	PALTA3		0	0	0	0	0	0	0	0	0	0	0		0	0	0	0	0	0		0	0	0	0	0	0	0	0		0	0	0	0	0	0
TGAGGTTTTCTGCAGTACACGC	23H-RNA	PALTA3		0	0	0	0	0	0.07	0	0	0	0	0		0.07	0	0	0	0	0		0	0	0	0	0	0	0	0		0	0	0	0	0.18	0
TGAGTGGCGAAAATCGGAAATT	23H-RNA	other		0	0	0	0	0	0	0	0	0	0	0		0	0	0	0	0	0		0	0	0	0	0	0	0	0		0	0	0	0	0	0
TGATCTACAAAAAATGCGGGAAC	23H-RNA	CELE14B		0	0	0	0	0	0	0	0	0	0	0		0	0	0	0	0	0		0	0	0	0	0	0	0	0		0	0	0	0	0	0
TGATCTACAAAAAATGCGGGAATT	23H-RNA	CELE14B		0	0	0	0	0	0	0	0	0	0	0		0	0	0	0.06	0	0		0	0	0	0	0	0	0	0		0	0	0	0	0	0
TGATCTACCTGTTGAACTTGACC	23H-RNA	other		0.07	0	0	0	0	0	0	0	0	0	0		0	0	0	0	0	0		0	0	0	0	0.1	0	0	0		0	0	0	0	0	0
TGATCTACCTGTTGAACTTGACT	23H-RNA	TIR54TA1		0.07	0	0	0.07	0	0	0	0	0	0	0		0	0	0	0	0	0		0	0	0	0	0.1	0	0	0		0	0.05	0	0	0	0
TGATCTCTCTTCTCGGCTCTTCG	23H-RNA	ChrIII_hairpin1		0.07	0	0	0	0	0	0	0	0	0	0		0	0	0	0	0	0.07		0	0	0	0	0	0	0	0		0	0	0	0	0	0
TGATGCGGTTGTTCCAAAGAATC	23H-RNA	F55A4.9, rncs-1		0.14	0.38	0.06	0.07	0	0	0.06	0.35	0	0	0		0	0.06	0.35	0.28	0.19	0.41		0.14	0	0	0.5	0.61	0.12	0	0		0.18	0	0.13	0.05	0	0
TGATGCGGTTGTTCCAAAGAATCC	23H-RNA	F55A4.9, rncs-1		0.07	0.06	0.06	0.14	0	0	0	0	0	0	0		0	0	0	0.07	0	0.07		0	0	0	0	0	0	0.09	0		0	0	0	0.05	0	0
TGATGGCGTGGAAGAAGTTGA	23H-RNA	Y57G11C.1145_hairpin		0	0	0	0	0	0	0	0	0	0	0		0	0	0	0.07	0	0		0	0	0	0	0	0	0	0		0	0	0	0	0	0
TGATGTGGATGATGGCGTGGAAG	23H-RNA	Y57G11C.1145_hairpin		0	0.06	0	0	0	0	0	0	0	0	0		0	0	0	0	0	0		0	0	0	0	0	0	0	0		0	0	0	0	0	0
TGCAAATGAAATCGTGGGAGGGG	23H-RNA	Unknown_RE7		0	0	0	0	0	0	0	0	0	0	0		0	0	0	0	0	0		0	0	0	0	0	0	0	0		0	0	0	0.05	0	0
TGCAAATGAAATCGTGGGCGGG	23H-RNA	mir-5550_RE		0	0	0.06	0	0.39	0	0	0	0	0	0		0	0	0	0	0	0		0	0	0	0	0	0	0	0		0	0	0	0	0	0
TGCACAGACTGAGCATTTTCCCCC	23H-RNA	other		0.07	0.06	0	0	0	0	0	0	0	0	0		0	0	0	0	0	0		0	0	0	0	0	0	0	0		0	0	0	0	0	0
TGCAGAGAGCCTAAGGAGCATC	23H-RNA	other		0	0	0	0	0	0	0	0	0	0	0		0	0	0	0.07	0.05	0		0	0	0	0	0	0	0	0		0	0	0	0	0	0
TGCCTCTTCATCAACTTCTTCC	23H-RNA	Y57G11C.1145_hairpin		0	0.06	0	0	0	0	0	0	0	0	0		0	0	0	0	0	0		0	0	0	0	0	0	0	0		0	0	0	0	0	0
TGCGACGGATCAGTGTTGCCACT	23H-RNA	T05E12.8		0.07	0.26	0	0	0	0	0	0	0	0	0		0	0	0	0	0	0		0	0	0	0	0.1	0	0	0.1		0	0	0	0	0	0
TGCGGAGAAATGACGAGAAAT	23H-RNA	other		0	0	0	0	0	0	0	0	0	0	0		0	0	0	0	0	0		0	0	0	0	0	0	0	0		0	0	0	0	0	0
TGCGGCGAGGATGATGTGGATG	23H-RNA	Y57G11C.1145_hairpin		0	0	0	0	0	0	0	0	0	0	0		0	0	0	0	0	0		0	0	0	0	0	0	0	0		0	0	0	0	0	0
TGCGGCGAGGATGATGTGGATGA	23H-RNA	Y57G11C.1145_hairpin		0	0	0	0	0	0	0	0	0	0	0		0	0	0	0	0	0		0	0	0	0	0	0	0	0		0	0	0	0	0	0
TGCGTCTCTCCCCCTCCCACACT	23H-RNA	other		0	0	0	0	0	0	0	0	0	0	0		0	0	0	0	0	0		0	0	0	0	0	0	0	0		0	0	0	0	0	0
TGCTCGTCGATCCAGTTTGGCC	23H-RNA	F55A4.9, rncs-1		0.14	0.06	0.13	0.07	0	0	0	0.06	0	0	0		0	0	0.06	0.14	0	0		0	0	0	0	0.1	0	0	0		0	0.05	0	0	0	0
TGCTCGTCGATCCAGTTTGGCCA	23H-RNA	F55A4.9, rncs-1		0.14	0	0.13	0	0.06	0	0	0.06	0	0	0		0	0	0.06	0	0	0		0	0	0	0	0	0	0.18	0		0	0.05	0	0.05	0	0
TGCTTTCCTCATCTCTGATCT	23H-RNA	F55A4.9, rncs-1		0.07	0	0.06	0.43	0.12	0.21	0.18	0	0	0	0		0.21	0.18	0	0	0.05	0.07		0.14	0	0	0	0	0	0	0		0	0	0	0	0	0
TGCTTTCCTCATCTCTGATCTTTT	23H-RNA	F55A4.9, rncs-1		0.28	0.06	0	0.07	0	0	0	0	0	0	0		0	0	0	0	0.1	0.21		0	0	0	0	0.2	0	0	0		0	0.05	0.06	0	0	0
TGGAAATATGACGGCTGCTACGA	23H-RNA	F53H1.4		0	0	0	0	0	0	0	0	0	0	0		0	0	0	0	0	0		0	0	0	0	0	0	0	0		0	0	0	0	0	0
TGGACCATCCGCAACAGTGATA	23H-RNA	F57G8.14, F57G8.15, linc-59		0	0	0	0	0.06	0	0	0	0	0	0		0	0	0	0	0	0		0	0	0	0.25	0	0	0	0		0	0	0	0.05	0	0
TGGATAAGATGATGAAACTAGTC	23H-RNA	F55A4.9, rncs-1		0	0	0	0	0	0	0	0	0	0	0		0	0	0	0.14	0	0		0	0	0	0.25	0	0	0	0		0.18	0	0.19	0.05	0	0
TGGATGATGGCGTGGAAGAAG	23H-RNA	Y57G11C.1145_hairpin		0	0.13	0	0	0.12	0	0	0	0	0	0		0	0	0	0	0	0		0	0	0	0	0	0	0	0		0	0	0	0	0	0
TGGCCAAACTGGATTGACGAG	23H-RNA	F55A4.9, rncs-1		0	0	0	0	0	0	0	0	0	0	0		0	0	0	0	0	0		0	0	0	0	0	0	0	0		0	0	0	0	0	0
TGGCCAAACTGGATTGACGAGC	23H-RNA	F55A4.9, rncs-1		0	0	0.19	0	0.06	0	0	0	0	0	0		0	0	0	0	0.05	0		0	0	0	0	0	0	0.09	0		0	0	0	0	0	0
TGGCCAAGCGGACTGGAGCACA	23H-RNA	F55A4.9, rncs-1		0	0.06	0	0	0	0.07	0	0	0	0	0		0.07	0	0	0	0	0		0	0	0	0	0	0.12	0	0		0	0.05	0	0	0	0
TGGCGTGTACTGCAGAAAACCC	23H-RNA	Y105C5A.15		0	0	0	0	0	0	0	0	0	0	0		0	0	0	0	0	0		0	0	0	0	0	0	0	0		0	0	0	0	0	0
TGGGAATGCAGAAGAAAAGAGGG	23H-RNA	other		0	0	0	0	0	0	0	0	0	0	0		0	0	0	0	0	0		0	0	0	0	0	0	0	0		0	0	0	0	0	0
TGGGCGGGGCCAATCCGGAATGC	23H-RNA	Y24F12A.3, Y24F12A.4		0	0	0	0	0	0	0	0	0	0	0		0	0	0	0	0	0		0	0	0	0	0	0	0	0		0	0	0	0	0	0
TGGTGGAGCTGGACGATGGATT	23H-RNA	F55A4.9, rncs-1		0	0	0	0	0	0	0	0	0	0	0		0	0	0	0	0	0		0	0	0	0	0	0	0	0		0	0	0	0	0	0
TGGTTAGGATTCGTGGTTTTCA	23H-RNA	tRNA		0	0	0	0	0	0	0	0	0	0	0		0	0	0	0	0	0		0	0	0.13	0	0.1	0	0	0		0	0.05	0.06	0	0.18	0
TGTAGATCAAACCGTCATGGG	23H-RNA	CELE14B		0	0	0	0	0	0	0	0	0	0	0		0	0	0	0	0	0		0	0	0	0	0	0	0	0		0	0	0	0	0	0
TGTAGATCACACCGTGATGGGAC	23H-RNA	CELE14B		0	0	0	0	0	0	0	0	0	0	0		0	0	0	0.05	0	0		0	0	0	0	0	0	0	0		0	0	0	0	0	0
TGTAGTTTGTAGTCTAGCAGACC	23H-RNA	TGTAGTTTGTAGTCTAGCAGACC_repeat		0.03	0	0	0	0	0	0.03	0	0	0	0		0	0.03	0	0	0	0		0	0	0	0	0	0	0	0		0	0	0	0	0	0
TGTATTAAACGGTAAGGGCCGGCT	23H-RNA	mir-5592		0	0	0.19	0.36	0.23	0.35	0.24	0.06	0.17	0.11	0		0.35	0.24	0.06	0.63	1.38	0.9		0.55	0.98	0.76	1	1.22	0.83	1.47	1.31		1.06	0.86	1.09	0.5	0.74	0.61
TGTCTTCCTTTTGTTTCTCTTCC	23H-RNA	F19B2.5		0	0	0	0	0	0	0	0	0	0	0		0	0	0	0	0	0		0	0	0	0	0	0	0	0		0	0	0	0	0	0
TGTGAACAGCGAGACACTATTCC	23H-RNA	Y71A12B.2, Y71A12B.3		0	0	0	0	0	0	0	0	0	0	0		0	0	0	0	0	0		0	0	0	0	0	0	0	0		0	0	0	0	0	0
TGTGAAGACATCTCAGAAACATC	23H-RNA	F43E2.6		0.07	0	0	0	0	0	0	0	0	0	0		0	0	0	0.14	0	0		0	0	0	0.25	0	0	0	0		0	0.05	0	0	0	0.2
TGTGAAGACATCTCAGAAACATCG	23H-RNA	F43E2.6		0	0	0	0	0.06	0	0	0	0	0	0		0	0	0	0	0	0		0	0	0	0	0	0	0	0		0	0	0	0	0	0
TGTGCTGAGCTCTTGGATGATC	23H-RNA	puf-10, Y48G1BL.3		0	0	0	0	0	0	0	0	0	0	0		0	0	0	0	0	0		0	0	0	0	0	0	0	0		0	0	0	0	0	0
TGTGGATGATGGCGTGGAAGA	23H-RNA	Y57G11C.1145_hairpin		0	0	0	0	0	0	0	0	0	0	0		0	0	0	0	0	0		0	0	0	0	0	0	0	0		0	0	0	0	0	0
TGTGGATGATGGCGTGGAAGAA	23H-RNA	Y57G11C.1145_hairpin		0	0	0	0	0	0	0	0	0	0	0		0	0	0	0	0	0		0	0	0	0	0	0	0	0		0	0	0	0	0	0
TGTGGATGATGGCGTGGAAGAAG	23H-RNA	Y57G11C.1145_hairpin		0	0	0	0	0	0	0	0	0	0	0		0	0	0	0	0	0.07		0	0	0	0	0.1	0	0	0		0	0	0.06	0.05	0.18	0
TGTGGCCCGCGGTAATTACATCC	23H-RNA	F41F3.10		0	0.06	0	0	0	0	0	0	0	0	0		0	0	0	0	0	0		0	0	0	0	0	0	0	0		0	0	0	0	0	0
TGTGGGCCCTCGCACTGTCTACC	23H-RNA	E01G4.5		0	0	0	0	0	0	0	0	0	0	0		0	0	0	0	0	0		0	0	0	0	0	0	0	0		0	0	0	0	0	0
TGTGGGCGGGGCCAATCCGGAA	23H-RNA	H15N14.4, H37A05.4, Y24F12A.3, Y24F12A.4		0	0	0	0	0	0	0	0	0	0	0		0	0	0	0	0	0		0	0	0	0	0	0	0	0		0	0	0	0	0	0
TGTGTTCGTCCTCCATACATTG	23H-RNA	C36A4.14		0	0	0	0	0	0	0	0	0	0	0		0	0	0	0	0	0.07		0	0	0	0	0	0	0	0		0	0	0	0	0	0
TGTTCTGCTCTCTCTTTCAGC	23H-RNA	F55A4.9, rncs-1		0	0	0.06	0.07	0	0	0	0	0	0	0		0	0	0	0	0	0		0	0	0	0	0	0	0	0		0	0	0	0	0	0
TGTTCTGCTCTCTCTTTCAGCT	23H-RNA	F55A4.9, rncs-1		0	0	0.26	0	0.06	0	0	0	0	0	0		0	0	0	0.28	0.1	0.07		0	0	0	0	0	0	0	0		0	0	0	0	0	0
TGTTTCTGAGATGTCTTCACA	23H-RNA	F43E2.6		0	0	0	0	0	0	0	0	0	0	0		0	0	0	0	0.05	0.14		0.14	0	0	0	0	0	0	0		0	0	0	0	0	0
TGTTTCTGAGATGTCTTCACAAT	23H-RNA	F43E2.6		0.14	0.06	0	0	0.06	0.07	0	0	0	0	0		0.07	0	0	0.07	0	0		0	0	0	0	0.1	0	0.09	0		0	0	0	0.05	0	0
TGTTTTACACCGGATTGCCAGT	23H-RNA	Y116F11A.1		0.07	0.06	0	0	0	0	0	0	0	0	0		0	0	0	0	0	0		0	0	0	0	0	0	0	0		0	0	0	0	0	0
TTAAACACAGCGGCGCGCGGAAC	23H-RNA	other		0	0	0	0	0	0	0	0	0	0	0		0	0	0	0	0	0		0	0	0	0	0	0	0	0		0	0	0	0	0	0
TTAAACGCAGCGGCGCGCGGAAC	23H-RNA	PALTA3		0	0	0.06	0.36	0.12	0	0.12	0.17	0	0	0		0	0.12	0.17	0	0	0.21		0	0.09	0	0	0	0.12	0	0		0.18	0	0.06	0	0	0
TTAAACGGTAAGGGCCGGCTG	23H-RNA	mir-5592		0	0.04	11.95	11.06	9.55	7.27	6.16	7.9	4.53	2.82	1.74		7.27	6.16	7.9	7.94	7.2	7.26		5.88	5.57	3.7	8.34	10.12	7.72	5.39	6.6		2.36	1.81	2.1	1.47	2.59	2.29
TTAAACGGTAAGGGCCGGCTGGG	23H-RNA	mir-5592		0	0	0.77	0.81	0.81	0.28	0.47	0.27	0.35	0.14	0		0.28	0.47	0.27	0.8	0.57	0.78		0.46	0.24	0.34	0.67	0.34	0.32	0.67	0.81		0.12	0.2	0.34	0.5	0.12	0.4
TTAAAGTTGATGGACGGCGAGATT	23H-RNA	PALTTAA1		0	0	0	0	0	0	0	0	0	0	0		0	0	0	0	0	0		0	0	0	0	0	0	0	0		0	0	0.06	0	0	0
TTACAGTACTCCTGAAAGGCACA	23H-RNA	B0303.7		0	0.13	0	0	0	0	0	0	0	0	0		0	0	0	0	0	0		0	0	0	0.25	0	0	0	0		0	0	0	0	0	0
TTAGAGAGTGACAGACATCCGGG	23H-RNA	Unknown_RE2		0	0	0	0	0	0	0	0	0	0	0		0	0	0	0	0	0		0	0	0	0	0	0	0	0		0	0	0	0	0	0
TTAGATACCGTACCCCGAAAAC	23H-RNA	ChrIII_hairpin2		0	0	0	0	0	0	0	0	0	0	0		0	0	0	0	0	0		0	0	0	0	0	0	0	0		0	0	0	0	0	0
TTAGATACCGTACCCCGAAAACT	23H-RNA	ChrIII_hairpin2		0.07	0	0	0.21	0	0	0	0	0	0	0		0	0	0	0	0	0.07		0	0	0	0	0	0	0	0		0	0.05	0	0	0.18	0
TTAGGATTCGTGGTTTTCACCC	23H-RNA	tRNA		0	0.06	0.06	0.14	0.06	0	0	0	0	0.11	0		0	0	0	0	0	0.07		0	0.09	0.13	0	0.2	0.12	0.09	0.2		0.35	0.3	0.13	0.1	0	0
TTAGGTTTTCTGCAGTACACGC	23H-RNA	PALTA3		0	0	0.06	0	0	0	0	0	0	0	0		0	0	0	0	0	0		0	0	0	0.24	0	0	0	0		0	0	0.06	0	0	0
TTATCTAATCTCCATGTCACCC	23H-RNA	Y37E11B.2		0	0	0	0	0	0	0	0	0	0	0		0	0	0	0	0	0		0	0	0	0	0	0	0	0		0	0	0	0	0	0
TTCAAACATTCGGCAATGGGGTA	23H-RNA	Y37E3.30		0	0	0	0	0	0	0	0	0	0	0		0	0	0	0	0	0		0	0	0	0	0	0	0	0.1		0	0	0	0	0	0
TTCCACGCCATCATCCACATC	23H-RNA	Y57G11C.1145_hairpin		0	0	0	0	0	0	0	0	0	0	0		0	0	0	0	0	0		0	0	0	0	0	0	0	0		0	0.05	0	0	0	0
TTCCCGCATTTTTTGTAGATCA	23H-RNA	CELE14B		0.06	0.05	0.1	0.06	0.19	0.06	0	0	0	0	0		0.06	0	0	0	0	0		0.11	0	0	0	0	0	0	0		0	0.04	0	0	0	0
TTCCCTTTATGTCGCACTTGCG	23H-RNA	T05E12.10		0	0	0	0	0	0	0	0	0	0	0		0	0	0	0	0	0		0	0	0	0	0	0	0	0		0	0	0	0	0	0
TTCCCTTTATGTCGCACTTGCGC	23H-RNA	T05E12.10		0.07	0	0	0	0	0	0	0	0	0	0		0	0	0	0	0	0		0	0	0	0	0	0	0	0		0	0	0	0	0	0
TTCCGCGCGCCGCTATGTTTA	23H-RNA	PALTA3		0	0	0	0	0	0	0	0	0	0	0		0	0	0	0	0	0		0	0	0	0	0	0	0	0		0	0	0	0	0	0
TTCCGCGCGCCGCTATGTTTAAC	23H-RNA	PALTA3		0	0	0	0	0	0	0	0	0	0	0		0	0	0	0	0	0.07		0	0	0	0	0	0	0	0		0	0	0	0	0	0
TTCCGCGCGCCGCTATGTTTAACT	23H-RNA	PALTA3		0	0	0	0	0	0	0	0	0	0	0		0	0	0	0	0	0		0	0	0	0	0	0	0	0		0	0.05	0	0	0	0
TTCCTCATCTCTGATCTTTTCCA	23H-RNA	F55A4.9, rncs-1		0.07	0.06	0.19	0	0	0	0	0.06	0	0	0		0	0	0.06	0	0.05	0		0	0	0	0.5	0	0	0	0		0.18	0	0	0	0	0
TTCGCTCTCGATTCCGCATGCCG	23H-RNA	dnj-27_element		0	0	0	0	0	0	0	0	0	0	0		0	0	0	0	0	0		0	0	0	0	0	0	0	0		0	0	0	0	0	0
TTCGGACAGATGTGACACGGA	23H-RNA	PALTTAA3		0	0	0	0	0	0	0	0	0	0	0		0	0	0	0	0	0		0	0	0	0	0	0	0	0		0	0	0.05	0	0	0
TTCGGCAATGGGGTACCCTACG	23H-RNA	Y37E3.30		0.14	0	0	0	0	0	0	0	0	0	0		0	0	0	0	0	0		0	0.09	0	0	0	0	0	0		0	0	0	0	0	0
TTCTAAGTCCCTTTGATGCTC	23H-RNA	K06B9.6		0	0	0	0	0	0	0	0	0	0	0		0	0	0	0	0	0		0	0	0	0	0	0	0	0		0	0	0	0	0	0
TTCTACAAAAGGGACGCCGGAAA	23H-RNA	mtd-1, other, ZK337.5		0	0	0	0	0	0	0	0	0	0	0		0	0	0	0	0	0		0	0	0	0	0	0	0	0		0	0	0	0	0	0
TTCTACATATCCAAACGAGGAAC	23H-RNA	Y17D7C.3		0	0.06	0	0	0	0	0	0	0	0	0		0	0	0	0	0	0		0	0	0	0	0	0	0	0		0	0	0	0	0	0
TTCTACATATCCAAACGAGGAACC	23H-RNA	Y17D7C.3		0	0	0	0	0	0	0	0	0	0	0		0	0	0	0	0	0		0	0	0	0	0	0	0	0		0	0	0	0	0	0
TTCTGTCATCACCCGCGGGGC	23H-RNA	dnj-27_element		0	0	0	0	0	0	0	0	0	0	0		0	0	0	0	0	0		0	0	0	0	0	0	0	0		0	0	0	0	0	0
TTCTGTGGGCGGGGCCAATCCC	23H-RNA	DNA-8-1		0	0	0	0	0	0	0	0	0	0	0		0	0	0	0	0.05	0		0	0	0	0	0	0	0	0		0	0	0	0	0	0
TTGAAGAATTTGAGTGAGGCTGA	23H-RNA	M4.2, puf-4		0	0	0	0	0	0	0	0	0	0	0		0	0	0	0	0	0		0	0	0	0	0	0	0	0		0	0	0	0	0	0
TTGCCTCTGAATGCCGAGTAGG	23H-RNA	other		0	0	0.19	0	0	0.07	0	0	0	0	0		0.07	0	0	0	0	0		0	0	0	0	0	0	0	0		0	0	0	0	0	0
TTGCCTCTGAATGCCGAGTAGGC	23H-RNA	gopc-1, other, ZK849.2		0	0	0	0	0	0	0	0	0	0	0		0	0	0	0.07	0	0		0	0	0	0	0	0	0	0		0	0	0	0	0	0
TTGCCTCTGAATGCCGAGTAGT	23H-RNA	IR1_CE		0	0	0.19	0.21	0.23	0.21	0	0	0	0	0		0.21	0	0	0.07	0.05	0.21		0	0.09	0.13	0	0.1	0.12	0.18	0		0.18	0.4	0.13	0.1	0.37	0
TTGCTTAACTTGCCAGATCGGAC	23H-RNA	rrn-4_RE		0	0	0	0	0	0.07	0	0	0	0	0		0.07	0	0	0	0	0		0	0	0	0	0	0	0	0		0	0	0	0	0	0
TTGCTTTCCTCATCTCTGATCT	23H-RNA	F55A4.9, rncs-1		0	0	0.26	0.07	0	0	0	0	0	0	0		0	0	0	0	0.05	0		0	0	0.13	0	0.2	0	0	0		0	0	0	0	0	0.2
TTGCTTTCCTCATCTCTGATCTT	23H-RNA	F55A4.9, rncs-1		0	0	0	0.21	0.17	0.07	0.18	0.23	0	0	0		0.07	0.18	0.23	0.14	0.1	0.14		0.28	0.09	0	0.25	0.31	0.12	0.09	0		0	0	0	0.05	0	0
TTGGCCAAACTGGATTGACGAGC	23H-RNA	F55A4.9, rncs-1		0.07	0	0.13	0.07	0	0	0	0	0	0	0		0	0	0	0.07	0.19	0		0.14	0	0.13	0.25	0.1	0	0	0		0	0	0	0	0	0
TTGGTGGGCCCTAGACGATTTTG	23H-RNA	MTCE.11, nduo-1		0	0	0	0	0	0	0	0	0	0	0		0	0	0	0	0	0		0	0	0	0	0	0	0	0		0	0	0	0	0	0
TTGTCTTCCTTTTGTTTCTCTTC	23H-RNA	F19B2.5		0	0	0	0	0	0	0	0	0	0	0		0	0	0	0	0	0		0	0	0	0	0	0	0	0		0	0	0	0	0	0
TTGTGAAGACATCTCAGAAACA	23H-RNA	F43E2.6		0.07	0	0	0	0.12	0.07	0.06	0.06	0	0	0		0.07	0.06	0.06	0	0.14	0.07		0	0.09	0.25	0	0	0.12	0.09	0		0	0	0	0.1	0	0
TTGTGTTCGTCCTCCATACATTG	23H-RNA	C36A4.14		0	0.06	0	0	0	0	0	0	0	0	0		0	0	0	0.21	0	0.07		0	0	0	0	0	0	0	0		0	0	0	0	0	0
TTTAAAGTCGTAGAAGTGGGAAA	23H-RNA	NPALTA1		0	0	0	0	0	0	0	0	0	0	0		0	0	0	0	0	0		0	0	0	0	0	0	0	0		0	0	0	0	0	0
TTTAGTGACTCTGGCCGTTCACC	23H-RNA	TTTAGTGACTCTGGCCGTTCACC_repeat		0.07	0	0.13	0.07	0.06	0	0	0.06	0.17	0.32	0		0	0	0.06	0.21	0.05	0.07		0.14	0	0	0	0	0.59	0.18	0.81		0.18	0.05	0	0.05	0.18	0.2
TTTCACGGCGGCCGACAATTTCC	23H-RNA	other		0	0	0	0	0	0	0	0	0	0	0		0	0	0	0	0	0		0	0	0	0	0	0	0	0		0	0	0	0	0	0
TTTCCAATGTGCTCCAGTCCGCT	23H-RNA	F55A4.9, rncs-1		0	0	0	0	0	0	0	0	0	0	0		0	0	0	0	0	0		0	0	0	0	0	0	0	0		0	0	0	0	0	0
TTTCCTCATCTCTGATCTTTTC	23H-RNA	F55A4.9, rncs-1		0.07	0.13	0.26	0.14	0.06	0.07	0	0	0	0	0		0.07	0	0	0	0.05	0		0	0	0	0	0.1	0	0	0		0	0	0	0	0	0
TTTCCTCATCTCTGATCTTTTCCA	23H-RNA	F55A4.9, rncs-1		0.07	0.13	0	0	0	0	0	0	0	0	0		0	0	0	0.07	0.05	0.14		0.14	0	0	0.25	0.1	0	0	0		0	0	0	0	0	0
TTTCGAAACCGTGCGGCAGTTGC	23H-RNA	DNA-8-1		0	0.13	0	0	0.06	0	0	0.06	0	0	0		0	0	0.06	0	0	0		0	0	0.13	0	0.1	0.12	0	0		0	0.05	0	0.05	0	0
TTTCGGACAGATGTGACACGGA	23H-RNA	other		0	0	0	0	0	0	0.06	0	0	0	0		0	0.06	0	0	0	0		0	0	0.13	0	0	0	0	0		0	0	0	0	0	0
TTTCGGGGTACGGTATCTAAT	23H-RNA	ChrIII_hairpin2		0	0	0	0	0	0	0	0	0	0	0		0	0	0	0	0	0		0	0	0	0	0	0	0	0		0	0	0	0	0.18	0
TTTCGGGGTACGGTATCTAATAG	23H-RNA	ChrIII_hairpin2		0	0	0	0.28	0.06	0	0	0	0	0	0		0	0	0	0	0	0		0	0	0	0	0	0	0	0		0	0	0	0.05	0	0
TTTCGTCCATACATTGAGGGAGC	23H-RNA	F39E9.10		0.07	0	0	0	0	0	0	0	0	0	0		0	0	0	0	0	0		0	0	0	0	0	0	0	0		0	0	0	0	0	0
TTTCGTTCTTGGTGAAAAAAGTG	23H-RNA	E01G4.7		0	0.13	0	0	0	0	0	0	0	0	0		0	0	0	0	0	0		0	0	0	0	0	0	0	0		0	0	0	0	0	0
TTTCTCTTCCTCTTGCTTCTGT	23H-RNA	F19B2.5		0	0	0	0	0	0	0	0	0	0	0		0	0	0	0	0.05	0		0	0	0	0	0	0	0	0		0	0	0	0.05	0	0
TTTCTCTTCCTCTTGCTTCTGTT	23H-RNA	F19B2.5		0	0	0	0	0	0	0	0	0	0	0		0	0	0	0	0	0		0	0	0	0	0	0	0	0		0	0	0	0	0	0
TTTCTGAGATGTCTTCACAATT	23H-RNA	F43E2.6		0.28	0.13	0.45	0	0	0.14	0.06	0.12	0	0	0		0.14	0.06	0.12	0.21	0.33	0.14		0	0.09	0	0.25	0	0	0.09	0		0	0.05	0.06	0	0	0.2
TTTCTGCAGTACACGCCACGC	23H-RNA	PALTA3		0.14	0.06	0	0	0	0	0.06	0.06	0.17	0	0		0	0.06	0.06	0	0.09	0		0.14	0	0.12	0	0	0.12	0	0.1		0	0	0.06	0.05	0	0
TTTGATACCTGGACTCTTTCC	23H-RNA	E01G4.7		0.07	0	0	0	0	0	0	0.06	0	0	0		0	0	0.06	0	0	0		0	0	0	0	0	0	0	0		0	0	0	0	0	0
TTTGATCTACCTGTTGAACTTG	23H-RNA	TIR54TA1		0	0	0	0	0.05	0	0.05	0	0	0	0		0	0.05	0	0	0	0		0	0	0	0	0	0	0	0.09		0	0	0	0.04	0	0
TTTGATCTACCTGTTGAACTTGA	23H-RNA	other		0	0	0	0	0	0	0	0	0	0	0		0	0	0	0	0	0		0	0	0	0	0	0	0	0		0	0	0	0	0	0
TTTGATCTACGAAAAATGCGGGA	23H-RNA	CELE14B		0	0	0	0	0	0	0	0	0	0	0		0	0	0	0	0	0		0	0	0	0	0	0	0	0		0	0	0	0	0	0
TTTGGAACAGAAGCAAGAGGA	23H-RNA	F19B2.5		0	0	0	0	0	0	0	0	0	0	0		0	0	0	0	0	0		0	0	0	0	0	0	0	0		0	0	0	0	0	0
TTTGGCAGCCCCCGACACTTTCG	23H-RNA	F39D8.3		0	0	0	0	0	0	0	0	0	0	0		0	0	0	0	0	0		0	0	0	0	0	0	0	0		0	0	0	0	0	0
TTTGGCCAAGCGGACTGGAGC	23H-RNA	F55A4.9, rncs-1		0.07	0	0	0.14	0	0	0	0.06	0	0	0		0	0	0.06	0	0	0.07		0	0	0	0.5	0.2	0	0.09	0		0	0	0	0	0	0
TTTGGGGGGCAGAAATCGGAAA	23H-RNA	PAL8C		0	0	0	0	0.05	0	0	0	0	0	0		0	0	0	0	0	0		0	0	0	0	0	0	0	0		0	0.04	0	0	0	0
TTTGTTTCTCTTCCTCTTGCTTC	23H-RNA	F19B2.5		0	0	0	0	0	0	0	0	0	0	0		0	0	0	0	0	0		0	0	0	0	0	0	0	0		0	0	0	0	0	0
TTTTAAAACCGTGCGGCAGTTGC	23H-RNA	DNA-8-1		0	0.03	0.03	0.07	0.03	0	0	0	0	0	0		0	0	0	0	0	0		0	0	0	0	0	0	0	0		0	0.05	0.03	0	0	0
TTTTCGGGGTACGGTATCTAAT	23H-RNA	ChrIII_hairpin2		0.07	0.13	0.26	0	0	0	0	0	0	0	0		0	0	0	0	0	0		0	0	0	0	0.2	0	0.09	0		0.18	0.05	0.06	0	0	0
TTTTCGGGGTACGGTATCTAATA	23H-RNA	ChrIII_hairpin2		0	0	0	0	0	0	0	0	0	0	0		0	0	0	0	0.05	0		0	0	0	0	0	0	0	0		0	0	0	0	0	0
TTTTGAAAGTTCTACCGTTCTC	23H-RNA	F34D6.11, linc-12		0.07	0	0	0	0	0	0	0	0	0	0		0	0	0	0	0	0		0	0	0	0	0	0	0	0		0	0	0	0	0	0
TTTTGATCTACCTGTTGAACTTG	23H-RNA	TIR54TA1		0	0	0.18	0	0	0	0	0	0	0	0		0	0	0	0	0	0		0	0	0	0	0	0	0	0		0	0	0	0	0.17	0
TTTTGCCTTTTCCCCGTGAGT	23H-RNA	PALTA3		0	0	0	0	0	0	0	0	0	0	0		0	0	0	0	0	0		0	0	0	0	0	0	0	0		0	0	0	0	0	0
TTTTGGACCGAGTTGCCGTGACT	23H-RNA	PALNN1		0.14	0.13	0	0	0	0	0	0	0	0	0		0	0	0	0.07	0	0		0	0	0	0	0.1	0	0	0		0	0	0	0	0.18	0
TTTTGGGGGGCAGAAATCGGA	23H-RNA	PAL8C		0	0	0	0	0	0	0	0	0	0	0		0	0	0	0	0	0		0	0	0.13	0	0	0	0	0.2		0	0	0.13	0	0	0
TTTTGGGGGGCAGAAATCGGAA	23H-RNA	PAL8C		0	0	0.06	0	0.06	0	0	0	0	0	0		0	0	0	0	0	0		0	0	0	0	0.1	0	0	0		0.18	0.05	0.06	0.05	0	0.2
TTTTGGGGGGCAGAAATCGGAAA	23H-RNA	PAL8C		0	0	0.13	0.07	0	0	0	0	0	0	0		0	0	0	0	0.05	0		0	0	0	0	0	0.12	0	0		0.18	0.05	0	0.05	0	0
TTTTGTTTCTCTTCCTCTTGCT	23H-RNA	F19B2.5		0	0	0.77	0.28	0.17	0.07	0.06	0.06	0	0	0		0.07	0.06	0.06	0.07	0.1	0.07		0	0	0	0	0	0	0	0.1		0.18	0	0.19	0.05	0.18	0
TTTTGTTTCTCTTCCTCTTGCTT	23H-RNA	F19B2.5		0	0	0.26	0.14	0.17	0	0.06	0	0	0	0		0	0.06	0	0.07	0.1	0		0	0	0	0	0	0	0	0		0	0	0	0	0	0
TTTTGTTTCTCTTCCTCTTGCTTC	23H-RNA	F19B2.5		0	0	0.45	0.57	0.35	0	0	0	0	0	0		0	0	0	0.07	0.05	0.07		0	0	0	0	0	0	0	0		0	0	0.06	0.05	0	0
TTTTTCAGCGGTCTCGTTATG	23H-RNA	PAL5A		0	0	0	0	0	0	0	0	0	0	0		0	0	0	0.14	0	0		0	0	0	0	0	0.11	0	0.1		0	0	0	0.1	0	0
WBGene00045366	23H target 22G	Y17D7C.3		5179.4	5476.88	581.5	542.45	506.41	314.9	332	314.32	94.01	113.18	86.7		314.9	332	314.32	99.49	88.2	89.27		329.87	346.43	314.86	26.09	23.56	397.41	435.75	434.21		407.84	431.35	425.76	49.27	49.03	50.49
WBGene00235158	23H target 22G	Y37E3.30		3833.28	3274.56	805.67	693.37	621.02	241.01	238.34	259.41	10.62	8.13	4.51		241.01	238.34	259.41	252.14	186.02	209.14		183.02	198.23	184.63	63.02	71.49	346.11	369.99	369.03		308.09	309.19	320.19	4.11	5.54	3.03
WBGene00008447	23H target 22G	E01G4.5		2270.2	2052.1	30.07	26.21	24.46	142.98	166.06	152.97	6.35	6.34	6.08		142.98	166.06	152.97	125.08	90.56	107.21		106.11	118.1	105.97	3.38	1.7	149.17	166.97	169.3		31.51	36.48	33.04	2.21	2.19	2.16
WBGene00018199	23H target 22G	F39E9.7		1583.83	1417.57	150.05	152.36	147.15	90.56	89.74	93.98	16.67	16.83	15.07		90.56	89.74	93.98	84.59	77.99	80.79		93.92	96.85	84.37	33.3	33.87	126.99	138.23	138.28		143.4	138.54	136.51	2.49	2.15	2.28
WBGene00304895	23H target 22G	F52G3.8		1443.16	1241.89	107.63	99.06	95.96	184.26	189.01	202.33	19.5	20.76	25.62		184.26	189.01	202.33	170.01	141.65	147.25		101.41	106.12	104.55	22.13	26.15	159.26	171.38	162.37		63.23	56.13	60.21	1.29	1.39	0.81
WBGene00044258	23H target 22G	Y57G11C.51		407.89	439.8	79.3	85.84	83.11	168	161.25	148.1	250.62	238.93	228.83		168	161.25	148.1	83.28	68.35	72.2		124.59	130.93	131.83	4.83	3.59	445.17	473.87	442.69		195.47	210.08	204.08	175.75	174.05	170.1
WBGene00004622	23H target 22G	F31C3.9, rrn-3.1		786.54	759.7	312.66	318.39	343.64	190.99	241.45	218.05	2341.96	1234.65	1394.89		190.99	241.45	218.05	491.92	471.22	327.59		771.54	696.57	673.09	510.8	455.44	13714.5	14773.5	14321.1		113.28	117.84	105.78	125.84	126.78	125.27
WBGene00012499	23H target 22G	Y24F12A.4		467.85	444.39	16.59	15.94	17.6	40.34	46.63	44.08	29.49	31.64	36.45		40.34	46.63	44.08	53.09	37.25	41.9		32.88	36.92	32.49	0.7	0.21	42.99	46.82	46.55		15.78	15.26	15.51	11.04	9.58	10.5
WBGene00012498	23H target 22G	Y24F12A.3		452.3	430.03	16.09	15.19	16.91	39.07	44.92	42.43	29.23	30.59	35.85		39.07	44.92	42.43	51.72	36.92	40.82		31.3	35.46	31.66	0.71	0.21	41.69	44.92	44.51		15.95	15.23	15.16	11.06	9.36	10.38
WBGene00045410	23H target 22G	E01G4.7		497.59	437.73	163.22	169.77	143.85	84.39	84.06	83.74	22.72	26.85	26.36		84.39	84.06	83.74	92.94	82.46	82.1		79.22	86.02	84.63	4.21	2.7	91.11	102.41	98.33		163.09	165.93	169.74	20.15	21.8	20.32
WBGene00021375	23H target 22G	Y37E11B.2		501.56	464.25	632.12	599.81	546.63	259.32	218.81	217.68	15.35	16.46	10.98		259.32	218.81	217.68	209.87	199.6	197.88		278.36	301.77	320.32	97.85	96.65	457.61	493.81	464.67		930.44	904.77	908.91	9.07	8.47	7.89
WBGene00271791	23H target 22G	W03D2.15		495.28	462.52	3.92	3.88	3.91	18.36	15.48	17.47	0.35	0.77	0.29		18.36	15.48	17.47	19.1	12.53	16.05		12	9.87	11.92	0.54	0.25	15.51	15.13	16.58		2.18	2.65	2.39	0.74	0.77	1.28
WBGene00194650	23H target 22G	C36A4.14		402.98	357.81	134.94	121.84	105.1	63.69	61.99	62.17	22.4	24.95	21.81		63.69	61.99	62.17	71.63	59.33	67.72		61.95	58.06	58.68	7.17	6.59	45.1	49.51	47.42		95.15	93.75	91.38	16.24	16.94	16.18
WBGene00010100	23H target 22G	F55C9.3		310.02	267.51	107.65	100.56	93.42	10.56	9.83	10.8	0	0	0		10.56	9.83	10.8	8.47	7.17	7.17		10.6	11.65	12.31	8.67	11.61	20.08	20.38	19.83		34.22	33.75	32.04	0.17	0.25	0.2
WBGene00020902	23H target 22G	jmjc-1, T28F2.4		336	298.77	218.24	235.75	240.48	360.22	358.34	358.77	268.45	296.15	266.46		360.22	358.34	358.77	328.85	333.11	308.37		249.98	257.71	255.02	0.25	0.66	4.49	1.24	1.06		231.69	228.1	227.23	234.72	238.3	241.33
WBGene00013816	23H target 22G	Y116F11A.1		176.84	156.88	0.72	0.49	0.5	7.03	8.39	8.39	0	0	0		7.03	8.39	8.39	9.34	5.93	7.86		3.15	3.13	2.67	0.42	0.17	5.16	5.45	6.78		0.47	0.49	0.27	0.01	0	0
WBGene00044200	23H target 22G	H37A05.4		304.67	259.88	11.54	11.77	12.66	24.32	28.86	26.73	11.18	13.24	12.96		24.32	28.86	26.73	23.15	18.78	20.17		22.22	24.95	22.82	0.67	0.26	24.46	26.34	25.42		9.62	9.59	9.88	4.17	4.3	3.94
WBGene00077787	23H target 22G	T05E12.10		200.81	159.82	2.27	3.12	2.62	27.03	27.04	27.23	8.97	11.44	9.24		27.03	27.04	27.23	22.78	17.9	18.67		25.89	25.06	23.96	2.58	2.96	28.69	31.16	30.96		13.2	12.24	13.68	3.52	3.12	3.62
WBGene00013779	23H target 22G	Y116A8B.1		232.18	179.05	1.44	1.6	1.1	16.1	16.43	17.66	2.23	1.74	1.74		16.1	16.43	17.66	17.81	13.03	15.06		10.58	9.44	10.39	1.75	1.54	14.09	16.88	16.64		2.12	2.66	2.44	1.68	1.23	1.38
WBGene00004677	23H target 22G	F31C3.10, rrn-3.56		288.8	275.65	90.07	113.23	125.72	102.72	125.36	123.83	646.23	495.21	568.9		102.72	125.36	123.83	157.71	158.49	105.91		358.87	308.78	304.85	219.95	217.99	1700.95	1813.8	1766.63		27.68	30.45	26.06	27.24	34	29.72
WBGene00045311	23H target 22G	Y57G11C.57		122.14	121.51	54.9	56.61	49.66	119.59	115.64	91.11	167.91	167.32	169.14		119.59	115.64	91.11	24.45	18.94	19.92		55.38	61.73	52.04	3.25	2.6	155.04	155.89	149.87		71.98	75.04	71.25	75.35	73.09	78.86
WBGene00004512	23H target 22G	F31C3.7, rrn-1.1		197.92	148.84	49.65	51.95	53.09	21.06	27.03	23.77	260.96	112.39	139.19		21.06	27.03	23.77	77.09	73.14	50.8		78.82	68.04	66.86	59.9	57.03	1621.63	1728.99	1672.1		19.19	20.31	17.49	21.57	22.64	21.13
WBGene00004513	23H target 22G	F31C3.8, rrn-1.2		197.92	148.84	49.65	51.95	53.09	21.06	27.03	23.77	260.96	112.39	139.19		21.06	27.03	23.77	77.09	73.14	50.8		78.82	68.04	66.86	59.9	57.03	1621.63	1728.99	1672.1		19.19	20.31	17.49	21.57	22.64	21.13
WBGene00045382	23H target 22G	T05E12.8		96.91	94.88	1.18	1.6	0.99	11.39	13.37	11.7	2.44	2.43	2.69		11.39	13.37	11.7	10.29	7.4	8.17		9.17	10.21	8.58	1	1.12	12.05	13.14	13.38		2.3	2.94	2.44	0.3	0.18	0.2
WBGene00010507	23H target 22G	K02E2.6		90.82	89.24	378.01	350.91	330.14	147.82	135.05	142.58	5.45	6.55	5.67		147.82	135.05	142.58	164.52	136.78	139.96		129.19	133.5	143.16	36.6	43.89	200.46	210.23	195.14		420.07	421.87	432.61	1.22	1.66	1.01
WBGene00018394	23H target 22G	F43E2.6		69.66	51.5	64.32	70.79	69.65	21.95	24.6	25.08	6.27	7.87	6.54		21.95	24.6	25.08	7.65	8.76	6.9		26.69	25.89	23.02	2.38	1.73	55.99	54.49	51.66		34.93	32.02	30.3	38.67	42.87	40.64
WBGene00077437	23H target 22G	Y59H11AR.6		93.98	63.21	299.22	298.35	272.51	129.22	110.34	121.88	11.23	12.57	10.98		129.22	110.34	121.88	89.36	88.82	90.78		162.89	184.34	181.28	28.26	29.84	220.07	239.79	219.66		427.82	392.06	407.88	12.3	13.4	11.93
WBGene00077552	23H target 22G	H15N14.4		57.75	51.68	10.94	12.62	12.42	16.36	17.18	16.97	17.36	19.16	16.38		16.36	17.18	16.97	17.7	15.63	16.25		13.61	14.88	14.48	0.15	0.1	8.79	9.87	8.63		14.91	14.34	14.46	13.63	13.39	15.05
WBGene00004567	23H target 22G	F31C3.11, rrn-2.1		74.32	55.65	40.43	50.49	53.72	27.88	32.48	40.93	163.65	150.48	169.5		27.88	32.48	40.93	39.5	47.86	32.05		35.1	28.11	30.97	22.01	24.49	87.18	79.95	81.35		0.62	0.58	0.8	0.7	0.37	0.4
WBGene00220185	23H target 22G	Y57G11C.1145		14.78	19.19	56.98	61.14	49.63	165.4	153.78	125.22	190.8	194.53	160.56		165.4	153.78	125.22	22.73	14.83	16.51		53.1	58.89	58.91	3	2.24	89.6	78.93	66.05		157.14	160.74	155.72	177.51	171.77	189.16
WBGene00022087	23H target 22G	Y69A2AR.16		22.75	22.35	18.05	22.68	25.5	47.64	51.58	47.36	78.76	75.26	84.96		47.64	51.58	47.36	55.25	56.77	51.95		41.28	43.22	38.91	30.16	40.06	26.12	26.12	24.2		35.45	35.04	34.24	34.6	35.82	37.64
WBGene00185118	23H target 22G	K02E2.11		16.02	9.71	28.7	27.7	25.9	16.44	12.46	13.5	2.47	2.34	1.65		16.44	12.46	13.5	10.24	13.43	11.33		16.5	16.15	20.06	3.42	3.31	22.35	25.32	21.09		92.94	85.69	86.8	4.05	3.05	4.38
WBGene00001045	23H target 22G	dnj-27, Y47H9C.5		2.63	2.79	1.61	1.94	1.83	3.51	3.11	2.91	2.42	4.16	4.21		3.51	3.11	2.91	6.81	5.25	4.57		3.12	2.28	2.3	0.84	0.52	1.65	1.57	1.3		1.56	2	2.01	2.53	2.7	1.36
WBGene00013804	23H target 22G	Y116A8C.27		1.33	1.03	0.78	1.03	1.24	2.51	2.95	2.48	6.27	5.35	5.62		2.51	2.95	2.48	2.8	3.53	3.95		2.49	3.12	2.09	2.63	3.21	2.19	1.94	2.53		1.52	1.89	2.24	1.8	1.51	1.43
WBGene00023069	23H target 22G	F55A4.9, rncs-1		0.14	0.13	0.99	0.96	0.96	0.46	0.44	0.52	0	0	0		0.46	0.44	0.52	0.18	0.14	0.28		0.07	0.22	0.44	0.13	0.2	0.12	0.28	0.1		0.53	0.81	0.55	0.6	0.18	0
WBGene00008944	23H target 22G	F19B2.5		0.01	0.06	0.74	1.21	0.96	0.5	0.3	0.87	0	0	0		0.5	0.3	0.87	0.78	0.48	0.47		0.76	0.53	0.63	0	0	0.71	0.46	0.71		0.88	0.68	0.77	0.89	1.66	0.4
WBGene00013325	ALG Class 26G	Y57G11C.36		14.99	7.73	0.51	0.71	0.93	0.28	0.41	0.06	0.7	0.74	0.87		0.28	0.41	0.06	0	0.05	0.69		4.41	2.4	4.29	0.75	1.32	0.12	0.28	0.2		2.3	2.57	1.93	1.35	1.11	1.62
WBGene00011260	ALG Class 26G	cnnm-5, R13G10.4		0.21	0	14.02	14.74	14.1	0.07	0	0	0	0.11	0		0.07	0	0	0	0	0.14		0.14	0.36	0.25	3.25	3.97	0.35	0.92	0.4		1.59	3.07	3.02	4.01	2.59	3.44
WBGene00008878	ALG Class 26G	F16A11.3, ppfr-1		0.14	0	0.45	0.71	1.22	0	0	0	0.01	0.11	0.01		0	0	0	0.07	0	0		0	0.09	0	1.25	0.71	0.12	0.18	0		1.06	0.91	1.16	2.06	1.51	1.03
WBGene00013858	ALG Class 26G	ssp-34, ZC168.6		0	0	13.19	18.23	16.94	0.21	0.24	0.41	0	0.21	0.44		0.21	0.24	0.41	0.21	0.43	1.17		1.1	1.15	1.51	18.01	20.27	6.62	5.15	5.76		9.02	8.51	9.63	12.08	10.72	7.48
WBGene00020686	ALG Class 26G	T22D1.8		0	0	1.79	1.99	1.86	0	0	0	0	0	0		0	0	0	0	0	0.07		0	0.09	0.13	2.25	0.71	0.12	0.28	0.3		0.18	0.15	0.32	0.35	0	0.61
WBGene00001168	ALG Class 26G	eef-1A.1, F31E3.5		0.07	0.06	10.5	15.03	16.07	0	0.06	0.06	0	0.42	0		0	0.06	0.06	0.07	0.19	0.07		0.28	0.27	0	3.63	4.48	0.41	0.28	1.21		1.41	1.18	1.54	1.15	1.48	0.91
WBGene00001855	ALG Class 26G	C18G1.5, hil-4		0	0.06	0.96	0.85	1.33	0	0.06	0.06	0.17	0.32	0		0	0.06	0.06	0	0	0.14		0	0.18	0	0.5	0.41	0.35	0.37	0.2		0	0.2	0.13	0.3	0.37	0.2
WBGene00002263	ALG Class 26G	K08H10.1, lea-1		0	0	0.06	0	0.12	0	0	0	0	0	0		0	0	0	0	0	0		0	0	0	0.5	0	0	0	0		0.18	0.05	0.06	0.05	0	0.2
WBGene00004496	ALG Class 26G	F56E10.4, rps-27		0	0	1.28	3.42	1.28	0	0	0	0	0.11	0		0	0	0	0	0	0.07		0	0.09	0.13	0.5	0.41	0.24	0.09	0.2		0.88	0.4	0.83	0.65	0.37	0.4
WBGene00004906	ALG Class 26G	snf-7, ZK1010.9		0	0	5.76	6.91	6.61	0	0.12	0	0	0.11	0		0	0.12	0	0	0.05	0.07		0.14	0.09	0	1.5	2.44	0.71	0.28	0.4		3.54	2.31	1.99	3.06	3.14	2.63
WBGene00006704	ALG Class 26G	F58A4.10, ubc-7		0	0	5.44	7.26	9.34	0	0	0	0	0	0		0	0	0	0	0.1	0.21		0.69	0.44	0.13	3.75	3.77	0.83	0.92	0.81		4.07	4.28	4.36	5.06	4.8	5.86
WBGene00006975	ALG Class 26G	F54F2.2, zfp-1		0	0.06	0	0.28	0.23	0.07	0.06	0.06	0.35	0.11	0.29		0.07	0.06	0.06	0	0	0		0.14	0.18	0	0	0	0	0.09	0.1		0.18	0.35	0.71	0.05	0	0
WBGene00007385	ALG Class 26G	atp-5, C06H2.1		0	0	0.58	1.07	0.75	0	0	0	0	0	0		0	0	0	0	0	0		0	0	0	0.5	0.2	0	0.09	0		0.18	0	0.06	0.1	0	0
WBGene00007457	ALG Class 26G	C08F11.10		0	0	3.26	3.77	4.24	0.07	0.12	0.06	0	0	0		0.07	0.12	0.06	0	0.1	0.21		0.41	0.09	0.13	3.5	3.16	0.59	0.83	1.11		3.71	3.57	3.66	5.06	4.99	2.83
WBGene00008053	ALG Class 26G	C41C4.8, cdc-48.2		0	0	1.02	2.99	1.39	0	0	0	0	0	0		0	0	0	0.07	0.05	0.07		0	0.18	0	0.5	0.81	0.47	0.46	0.3		1.06	1.01	0.71	1.1	0.92	0.2
WBGene00008740	ALG Class 26G	F13D12.5		0	0	0.45	1.14	0.35	0	0.06	0	0.87	0.42	0.15		0	0.06	0	0	0	0		0.14	0.09	0.25	0.25	0.2	0.35	0.18	0.2		1.59	0.86	0.83	1.25	1.11	0.4
WBGene00012360	ALG Class 26G	tat-3, W09D10.2		0	0	0.83	2.14	2.2	0	0.06	0	0	0	0		0	0.06	0	0	0.05	0.07		0	0.27	0.38	1.25	1.02	0.24	0.37	0.5		1.06	1.61	1.73	1.15	2.77	1.01
WBGene00013854	ALG Class 26G	cyc-2.2, ZC116.2		0	0	6.53	6.48	7.37	0	0	0	0	0.42	0		0	0	0	0.07	0.05	0.07		0.14	0	0	1.75	1.43	0.12	0.18	0.2		1.95	1.21	1.48	1.25	1.48	1.82
WBGene00019086	ALG Class 26G	F59A6.4		0	0	8.26	9.76	8.06	0	0	0	0	0.21	0		0	0	0	0	0.1	0.55		0	0.53	0	4.75	2.55	0.47	0.37	1.01		1.59	1.76	1.99	2.21	4.07	2.22
WBGene00022170	ALG Class 26G	cox-6B, Y71H2AM.5		0	0	0.38	0.57	1.22	0.07	0	0	0	0	0		0.07	0	0	0.07	0	0.14		0	0.09	0	0.75	0.51	0.35	0.28	0.61		1.24	0.91	0.9	1.15	0.37	1.21
WBGene00021870	ALG Class 26G	samt-1, Y54G2A.4		0.06	0.08	1.42	0.61	1.23	0.02	0	0	0.09	0.03	0		0.02	0	0	0	0	0.21		0.07	0.04	0.19	0.56	0.53	0.03	0.09	0.15		1.49	1.53	1.98	1.72	1.52	1.77
WBGene00002005	ALG Class 26G	F26D10.3, hsp-1		0	0	0.51	0.53	0.87	0	0	0	0	0	0.15		0	0	0	0	0	0.28		0.07	0	0	0.38	0.66	0	0	0.15		0.35	0.4	0.71	0.5	0.37	1.21
WBGene00016942	ALG Class 26G	C55B7.3		0	0	7.91	10.29	10.39	0.07	0.12	0	0	0	0		0.07	0.12	0	0.04	0.17	0.34		0.14	0.62	0.38	4.25	3.87	0.35	1.01	1.11		5.13	3.93	4.01	5.74	4.44	6.98
WBGene00014172	ALG Class 26G	clpp-1, ZK970.2		0.01	0.03	2.83	3.92	4.54	0	0	0	0.01	0	0		0	0	0	0.01	0	0.07		0.04	0.22	0.03	2.17	1.44	0.51	0.13	0.06		0.79	0.78	0.52	0.53	0.42	0.58
WBGene00017559	ALG Class 26G	F18C5.4, mpz-3		0.01	0	3.67	6.35	5.43	0.08	0	0.06	0	0.07	0.04		0.08	0	0.06	0	0.05	0.07		0.23	0.13	0.25	1.14	1.5	0.32	0.08	0.38		1.7	1.92	1.89	2.01	1.88	1.95
WBGene00010633	ALG Class 26G	K07F5.5, nspd-2		0	0	3.41	8.4	7.15	0.14	0.07	0.15	0	0.11	0		0.14	0.07	0.15	0.02	0.13	0.16		0.41	0.2	0.13	1.94	2.7	0.74	0.71	0.76		0.66	0.68	0.83	0.89	0.97	0.91
WBGene00016058	ALG Class 26G	C24D10.7, nspd-3		0	0	6.67	7.92	8.18	0.12	0.08	0.03	0	0.04	0.12		0.12	0.08	0.03	0.02	0.12	0.33		0	0.19	0.4	3.27	3.85	0.97	0.9	0.67		2.79	1.56	1.58	1.92	1.22	2.39
WBGene00017386	ALG Class 26G	F11G11.8, nspd-5		0	0	5.23	5.23	4.96	0.07	0.03	0.06	0	0.04	0.05		0.07	0.03	0.06	0.02	0.12	0.24		0.07	0.16	0.36	2.44	2.07	0.15	0.68	0.49		1.34	1.16	1.45	1.43	1.16	1.42
WBGene00043147	ALG Class 26G	C24D10.8, nspd-6		0	0	7.44	9.7	9.84	0.12	0.08	0.03	0	0.04	0.12		0.12	0.08	0.03	0.02	0.04	0.4		0.14	0.19	0.27	2.65	3.63	1.33	0.85	0.72		1.81	1.38	1.55	1.87	1.49	1.79
WBGene00004075	ALG Class 26G	pod-1, Y76A2B.1		0	0	0.64	0.79	0.23	0	0	0	0	0.11	0.15		0	0	0	0	0	0		0.14	0	0	0.25	0	0.01	0.19	0		0	0.1	0.26	0.2	0.37	0.2
WBGene00011900	ALG Class 26G	T21C12.4		0.01	0.01	0.58	0.89	1.02	0	0	0	0	0	0		0	0	0	0	0	0		0	0	0.13	0	0.1	0.12	0	0.05		0.44	0.45	0.26	0.4	0.37	0.3
WBGene00019909	ALG Class 26G	R06A10.1		0	0	0.19	0	0.17	0	0	0	0	0	0		0	0	0	0	0	0		0	0	0	0.25	0.1	0	0	0		0	0.1	0.26	0.1	0.37	0
WBGene00000019	ALG Class 26G	abt-1, C24F3.5		0	0	2.11	2.21	2.26	0.01	0.06	0	0	0	0		0.01	0.06	0	0.07	0	0.07		0.28	0.27	0.13	1	0.92	0.24	0.37	0.3		0.71	0.81	0.58	0.85	0.74	0
WBGene00000023	ALG Class 26G	abt-5, Y53C10A.9		0	0	2.11	5.7	6.27	0	0	0.06	0	0	0		0	0	0.06	0.07	0.05	0.14		0.28	0.09	0	2.5	2.24	0.35	0.46	0.5		7.25	6.24	6.1	6.31	5.73	8.29
WBGene00000041	ALG Class 26G	aco-2, F54H12.1		0	0	0.13	0	0.17	0	0	0	0	0	0		0	0	0	0	0	0		0	0	0	0	0.1	0	0	0		0	0.25	0.06	0.1	0.18	0.2
WBGene00000063	ALG Class 26G	act-1, T04C12.6		0	0	0.49	0.82	0.67	0	0	0	0	0.05	0		0	0	0	0	0	0.03		0	0	0	0.13	0.38	0	0	0		0.53	0.49	0.29	0.22	0.37	0.51
WBGene00000064	ALG Class 26G	act-2, T04C12.5		0	0	1.32	1.93	1.14	0	0.06	0	0	0	0		0	0.06	0	0	0.05	0		0.41	0.53	0	4.25	3.64	0.59	0.83	0.91		2.65	1.38	2.37	1.47	1.85	2.02
WBGene00000065	ALG Class 26G	act-3, T04C12.4		0	0	3.82	4.67	4.1	0	0	0.06	0	0.05	0		0	0	0.06	0	0	0.03		0	0	0.25	1.13	0.79	0.12	0.37	0.2		1.24	0.39	0.35	0.77	0.74	0.3
WBGene00000098	ALG Class 26G	air-1, K07C11.2		0	0	0.38	0.93	1.1	0.07	0.06	0.06	0	0	0		0.07	0.06	0.06	0.07	0	0.07		0.14	0.09	0	0.5	0.81	0.24	0.09	0.5		1.24	1.21	1.6	1.3	1.48	1.01
WBGene00000114	ALG Class 26G	alh-8, F13D12.4		0	0	0.51	0.85	1.39	0	0	0	0	0	0		0	0	0	0	0	0		0.14	0	0	0.25	0.31	0	0	0		1.41	0.3	0.45	0.2	0.55	0.61
WBGene00000150	ALG Class 26G	apm-1, F55A12.7		0	0	0.7	1.71	0.87	0	0	0	0	0.21	0		0	0	0	0	0	0		0.14	0	0	0.5	0.61	0.24	0	0.1		0	0.15	0.19	0.35	0	0.4
WBGene00000182	ALG Class 26G	arf-1, B0336.2		0	0	2.82	5.13	2.9	0	0	0.06	0	0	0		0	0	0.06	0	0	0		0.28	0	0	0.75	1.02	0.35	0.09	0.3		1.06	1.41	1.73	2.76	1.85	2.63
WBGene00000187	ALG Class 26G	arl-1, F54C9.10		0	0	1.66	1.07	0.46	0	0	0	0	0	0		0	0	0	0	0	0		0	0	0.13	0.5	0.1	0.12	0.09	0		0.71	0.4	0.32	0.45	0.18	0
WBGene00000198	ALG Class 26G	art-1, C15F1.6		0	0	0.96	1.07	0.64	0	0	0	0	0	0		0	0	0	0	0	0.07		0.14	0	0	0.25	0	0	0.09	0.1		0.88	0.91	0.58	0.95	0.55	0.4
WBGene00000229	ALG Class 26G	atp-2, C34E10.6		0	0	0.7	0.36	0.41	0	0	0	0	0.11	0		0	0	0	0	0	0		0.14	0	0	0.25	0.31	0	0.09	0		0.18	0.15	0.19	0.1	0.18	0
WBGene00000230	ALG Class 26G	atp-3, F27C1.7		0.07	0.06	0.51	1.14	0.35	0	0	0	0	0	0		0	0	0	0	0	0		0	0	0	0	0.51	0	0	0.1		0.71	0.3	0.58	0.75	0.55	0.2
WBGene00000257	ALG Class 26G	bmk-1, F23B12.8		0	0.06	0.38	0.43	0.7	0	0	0	0	0.32	0.44		0	0	0	0	0.1	0.14		0.14	0.27	0	1.25	0.41	0.12	0.28	0		0.53	0.55	0.19	0.4	0.37	1.01
WBGene00000263	ALG Class 26G	F23H11.5		0	0	0.26	1	0.81	0.07	0	0	0	0.11	0		0.07	0	0	0	0	0.14		0	0.09	0	0.25	0.1	0	0.18	0		0.18	0.3	0.64	0.8	0.55	0.61
WBGene00000266	ALG Class 26G	bre-1, C53B4.7		0	0	2.05	3.35	3.02	0	0	0	0	0	0		0	0	0	0	0	0.21		0	0	0.13	0.5	0.31	0	0.28	0.1		0.35	0.5	0.32	0.95	0.74	0.81
WBGene00000268	ALG Class 26G	B0464.4, bre-3		0	0	1.22	2.85	3.31	0	0	0	0	0	0		0	0	0	0	0.1	0		0.14	0	0.13	2.5	1.63	0.47	0.55	0.4		0.88	1.46	1.54	2.26	3.14	1.21
WBGene00000269	ALG Class 26G	bre-4, Y73E7A.7		0	0	0.64	0.78	0.93	0	0	0	0	0	0		0	0	0	0	0	0		0.14	0	0.13	0.5	0.2	0	0	0.2		0.35	0.45	0.32	0.36	0.37	0.2
WBGene00000275	ALG Class 26G	bub-1, R06C7.8		0	0	0.26	0.36	0.7	0	0	0	0.35	0	0		0	0	0	0	0	0		0	0.09	0	0.25	0.51	0	0	0.3		0.71	0.35	0.19	0.25	0.74	0.2
WBGene00000389	ALG Class 26G	cdc-25.4, R05H5.2		0	0	0.9	1.99	2.03	0	0	0	0	0.11	0		0	0	0	0	0.05	0.14		0.14	0.18	0.25	2.25	1.73	0.24	0.37	0.61		2.12	2.11	1.99	2.61	3.51	3.44
WBGene00000405	ALG Class 26G	cdk-1, T05G5.3		0	0	0.9	0.71	0.99	0	0	0	0	0	0.15		0	0	0	0	0	0		0	0	0	0.25	0.2	0.12	0.18	0.1		0.35	0.35	0.64	1.1	0.37	0.81
WBGene00000418	ALG Class 26G	C35D10.9, ced-4		0.07	0	0.06	0.07	0	0	0	0	0	0.11	0.15		0	0	0	0	0	0.14		0.14	0	0	0.25	0	0	0	0.1		0	0.1	0	0.15	0	0
WBGene00000426	ALG Class 26G	ced-12, Y106G6E.5		0	0	0	0	0.12	0	0	0	0	0	0		0	0	0	0	0	0		0	0	0	0	0	0	0	0		0	0.05	0.06	0	0	0
WBGene00000475	ALG Class 26G	cey-4, Y39A1C.3		0	0	1.54	3.06	1.91	0.07	0	0	0	0	0		0.07	0	0	0	0	0		0	0	0	1	0.81	0.35	0.28	0.2		0.71	0.65	0.71	0.95	1.85	0.61
WBGene00000541	ALG Class 26G	cln-3.3, ZC190.1		0	0	0	0	0	0	0	0	0	0	0		0	0	0	0	0	0		0	0	0	0	0	0	0	0		0	0	0	0	0	0
WBGene00000552	ALG Class 26G	cmd-1, T21H3.3		0	0	6.66	6.2	6.96	0.07	0	0	0	0	0.07		0.07	0	0	0.04	0.07	0.34		0.14	0.09	0.13	2.63	3.31	0.53	0.64	0.91		3.36	2.09	1.67	1.9	2.03	2.22
WBGene00000567	ALG Class 26G	cnx-1, ZK632.6		0	0	0.32	0.78	0.99	0	0	0	0	0	0		0	0	0	0	0	0.07		0	0.09	0	1	0.61	0	0	0.2		0.18	0.2	0.19	0.1	0	0
WBGene00000771	ALG Class 26G	C30B5.3, cpb-2		0	0	2.69	5.7	5.51	0.14	0.06	0	0	0.21	0		0.14	0.06	0	0	0.14	0.28		0.14	0.18	0.25	0.75	1.12	0.35	0.37	0.3		1.59	1.26	1.8	1.1	1.48	1.42
WBGene00000777	ALG Class 26G	cpn-1, F43G9.9		0	0	1.09	2.99	1.97	0	0	0	0	0	0		0	0	0	0	0	0		0.14	0.09	0	0.25	0.2	0.12	0	0		0.18	0.25	0.19	0.2	0	0.2
WBGene00000802	ALG Class 26G	crt-1, Y38A10A.5		0	0.13	5.63	6.77	6.56	0	0.06	0	0	0	0		0	0.06	0	0	0.1	0.14		0	0	0	0.75	0.51	0.12	0.37	0.3		0.35	0.1	0.06	0.25	0	0.2
WBGene00000829	ALG Class 26G	ctb-1, MTCE.21		0	0	0	0	0	0	0	0	0	0	0		0	0	0	0	0	0		0	0	0	0	0	0	0	0		0	0	0	0	0	0
WBGene00000836	ALG Class 26G	cul-1, D2045.6		0	0	1.15	0.71	1.1	0	0	0	0	0	0		0	0	0	0	0.05	0.07		0	0	0	0.75	0.2	0.24	0.09	0.1		0	0.1	0.13	0.25	0.18	0.2
WBGene00000843	ALG Class 26G	cup-2, F25D7.1		0	0	1.6	1.71	1.1	0	0	0	0	0	0		0	0	0	0	0	0		0.14	0.27	0	0.25	0.41	0	0.46	0		0.71	1.01	0.83	0.9	1.29	1.21
WBGene00000875	ALG Class 26G	cyk-4, K08E3.6		0	0	4.1	4.77	4.24	0	0	0	0	0	0		0	0	0	0	0	0.07		0	0.18	0.13	0.75	1.32	0	0.09	0.4		1.24	0.7	0.9	0.8	0.74	0.61
WBGene00000878	ALG Class 26G	cyn-2, ZK520.5		0	0	2.37	2.56	2.73	0.07	0.06	0	0	0.21	0		0.07	0.06	0	0.07	0.05	0.07		0.28	0.18	0	1.25	2.14	0.24	0.18	0.3		0.88	0.91	0.83	1.1	2.59	1.21
WBGene00000881	ALG Class 26G	cyn-5, F31C3.1		0	0	1.41	1.57	1.91	0	0	0	0	0.11	0		0	0	0	0	0	0		0	0	0.13	0.25	0.2	0	0.09	0		0.53	0.4	0.96	0.7	0.55	0.4
WBGene00000896	ALG Class 26G	dad-1, F57B10.10		0	0	0.58	0.14	0.35	0	0	0	0	0	0		0	0	0	0	0	0		0	0	0	0	0	0	0	0		0.35	0.05	0	0	0.37	0
WBGene00000915	ALG Class 26G	C47E8.5, hsp-90		0	0.13	2.62	4.56	4.87	0.07	0	0	0	0.32	0		0.07	0	0	0	0.05	0.14		0.28	0.09	0.13	2.25	2.04	0.24	0.28	0.4		3.01	2.16	2.37	3.46	3.51	3.44
WBGene00001005	ALG Class 26G	dlc-1, T26A5.9		0	0	0.13	0.85	0.46	0	0	0	0	0	0		0	0	0	0	0	0		0	0	0	0.25	0.2	0	0	0.1		0.18	0.55	0.58	0.65	0.92	0.61
WBGene00001020	ALG Class 26G	B0035.2, dnj-2		0	0	0.26	0.07	0.46	0	0	0	0	0	0		0	0	0	0	0	0		0	0.09	0.06	0.25	0	0	0	0.1		0.53	0.15	0.29	0.1	0	0.2
WBGene00001023	ALG Class 26G	C04A2.7, dnj-5		0	0	0.51	1.35	0.23	0	0	0	0	0	0		0	0	0	0	0	0		0	0	0	0	0.31	0	0	0		0.18	0.05	0.19	0.15	0	0.2
WBGene00001037	ALG Class 26G	dnj-19, T05C3.5		0.07	0	1.66	2.85	2.9	0	0	0	0	0	0.15		0	0	0	0	0	0		0	0.18	0.25	2.75	1.32	0.47	0.37	0.3		0.53	1.26	1.35	1.7	0.92	1.01
WBGene00001038	ALG Class 26G	dnj-20, T15H9.7		0	0	1.22	0.71	1.28	0	0	0	0	0	0		0	0	0	0	0	0		0	0	0	0.25	0.61	0.12	0	0.1		0.18	0.35	0.32	0.7	0	0.61
WBGene00001046	ALG Class 26G	dnj-28, Y54E10BL.4		0	0	0.77	1.07	1.16	0	0	0.06	0	0	0		0	0	0.06	0	0	0		0	0	0	0.25	0.2	0.12	0	0		0.18	0.45	0.45	0.4	0.37	0.81
WBGene00001153	ALG Class 26G	ech-4, R06F6.9		0	0	0.58	0.5	1.04	0	0	0	0	0	0		0	0	0	0	0	0		0	0.09	0	0.25	0.2	0	0	0		0.18	0.05	0.06	0	0	0.2
WBGene00001155	ALG Class 26G	ech-6, T05G5.6		0	0	0.26	0.21	0.46	0	0	0	0	0	0		0	0	0	0	0	0		0	0	0	0	0.2	0.12	0	0		0	0.05	0	0	0	0.4
WBGene00001167	ALG Class 26G	eef-2, F25H5.4		0.14	0	1.98	2.28	1.86	0	0	0	0	0.11	0		0	0	0	0	0	0		0.14	0	0	0	0.2	0	0.09	0.2		0.18	0	0.06	0.05	0.18	0.2
WBGene00001227	ALG Class 26G	eif-3.D, R08D7.3		0	0	0.32	0.5	0.35	0	0	0	0	0	0		0	0	0	0	0	0		0	0.09	0	0	0.1	0	0	0		0.18	0.15	0.32	0.15	0	0
WBGene00001230	ALG Class 26G	eif-3.G, F22B5.2		0	0	1.92	2.92	1.8	0.07	0	0	0	0	0		0.07	0	0	0	0	0.07		0	0	0	0	0.41	0.12	0.55	0.1		0.18	0.3	0.26	0.1	0.74	0.4
WBGene00001245	ALG Class 26G	elo-7, F56H11.3		0	0	4.99	3.42	4.29	0	0	0	0	0.11	0		0	0	0	0	0	0.07		0	0.09	0.25	0.75	1.02	0	0.09	0.3		0.53	0.5	0.96	1.35	0.55	0.2
WBGene00001246	ALG Class 26G	elo-8, Y47D3A.30		0	0	2.69	4.63	6.03	0	0.06	0.06	0.17	0	0		0	0.06	0.06	0	0.05	0		0.41	0.09	0.25	7	4.79	1.65	0.92	1.11		2.83	3.22	3.02	4.11	3.33	1.62
WBGene00001303	ALG Class 26G	F32D8.6, sec-61.G		0	0	8.71	7.41	8.7	0	0.12	0	0	0	0		0	0.12	0	0.28	0.05	0		0.14	0.09	0	0.5	0.92	0.24	0.28	0.61		0.71	0.5	0.96	0.95	0.92	0.4
WBGene00001334	ALG Class 26G	ero-1, Y105E8B.8		0	0.03	1.34	1.14	1.04	0	0	0	0	0	0		0	0	0	0	0	0		0.14	0	0	0	0.41	0	0	0		0.18	0.35	0.32	0.2	0.37	0.2
WBGene00001371	ALG Class 26G	exl-1, F26H11.5		0	0	3.14	4.34	3.95	0	0.06	0	0	0	0.15		0	0.06	0	0	0	0.07		0.14	0.09	0	1	1.83	0.47	0.28	0.61		1.77	2.11	1.99	2.91	3.14	2.83
WBGene00001426	ALG Class 26G	F36H1.1, fkb-1		0	0	0.58	1.35	1.28	0	0	0	0	0	0		0	0	0	0	0	0.07		0	0.09	0	0.75	0.2	0	0	0		0.18	0.4	0.32	0.75	0.37	0.61
WBGene00001427	ALG Class 26G	fkb-2, Y18D10A.19		0	0	0.64	0.85	0.49	0	0	0	0.17	0	0		0	0	0	0	0	0		0	0	0	0.25	0.1	0.12	0	0.2		0.35	0.4	0.51	0.75	0.74	0.81
WBGene00001487	ALG Class 26G	frk-1, T04B2.2		0	0	0.9	3.35	3.25	0	0	0	0	0.11	0		0	0	0	0.14	0.1	0.07		0	0	0	0.5	1.02	0.12	0.28	0.4		0.71	1.86	2.18	1.75	2.22	2.22
WBGene00001488	ALG Class 26G	frm-1, ZK270.2		0.07	0.13	0.45	0.5	0.17	0.07	0	0	0	0.21	0		0.07	0	0	0	0	0		0.28	0.09	0	0	0	0.35	0.28	0.4		0.18	0.5	0.45	0.2	0.18	0.2
WBGene00001505	ALG Class 26G	fut-1, K08F8.3		0	0	0.06	0.5	0.23	0	0	0	0	0	0		0	0	0	0	0	0		0	0	0	0	0.1	0	0	0		0	0.1	0.32	0.45	0.37	0.4
WBGene00001538	ALG Class 26G	F08B1.2, gcy-12		0	0	0.13	0.36	0.17	0	0	0	0	0	0		0	0	0	0	0	0		0	0.09	0	0.5	0	0	0	0.2		0.18	0.15	0.06	0.35	0.37	0
WBGene00001558	ALG Class 26G	gdi-1, Y57G11C.10		0	0	0.19	0.14	0.35	0	0	0	0	0	0		0	0	0	0	0	0		0	0	0	0	0.41	0.12	0.09	0.1		0.18	0.4	0.32	0.5	0.18	0.61
WBGene00001565	ALG Class 26G	C14B9.6, gei-8		0	0	0.77	1.28	1.04	0	0	0	0	0.11	0		0	0	0	0	0	0		0	0	0	0	0.2	0.24	0.09	0.1		0.18	0.15	0.32	0.25	0.55	0.2
WBGene00001601	ALG Class 26G	glh-4, T12F5.3		0	0.03	0.67	0.89	0.7	0.04	0	0.03	0.09	0.11	0.07		0.04	0	0.03	0	0.05	0		0.14	0.09	0.06	0.13	0	0.18	0.18	0.05		0	0.2	0.19	0.35	0.28	0.1
WBGene00001603	ALG Class 26G	gln-2, K03H1.1		0	0	1.25	0.78	1.45	0	0	0	0	0	0		0	0	0	0	0	0.07		0	0	0.13	0	0.1	0	0.14	0.1		0.53	0.35	0.39	1.08	0.74	0.61
WBGene00001635	ALG Class 26G	gly-10, Y45F10D.3		0	0	0.38	0.85	0.7	0	0	0	0	0	0		0	0	0	0	0	0		0	0.09	0	0.5	0.1	0.12	0.09	0		0	0.05	0.06	0.1	0	0
WBGene00001683	ALG Class 26G	gpd-1, T09F3.3		0	0	0.42	0.5	0.93	0	0	0	0	0.05	0.15		0	0	0	0	0	0		0	0.04	0	0.25	0.31	0.06	0.28	0.66		1.15	1.33	1.51	1.58	1.39	1.21
WBGene00001686	ALG Class 26G	F33H1.2, gpd-4		0	0.06	0.1	0.43	0.75	0	0	0	0	0.05	0.15		0	0	0	0	0	0		0	0.04	0	0	0.1	0.3	0.28	0.05		0.97	0.53	1.19	1.08	0.83	2.02
WBGene00001840	ALG Class 26G	C26D10.2, hel-1		0	0	0.58	1.14	0.81	0	0.06	0	0	0	0.29		0	0.06	0	0	0	0		0.14	0	0	0	0.81	0.12	0.18	0.2		0.71	0.15	0.13	0.25	0	0.61
WBGene00001919	ALG Class 26G	B0035.10, his-45		0.02	0.03	0	0	0.01	0	0	0	0	0	0		0	0	0	0	0	0		0	0	0	0	0	0.12	0.05	0.06		0	0	0	0	0	0
WBGene00001944	ALG Class 26G	E03A3.4, his-70		0	0	8	14.31	14.79	0	0	0	0.17	0.63	0		0	0	0	0	0.1	0.14		0.41	0.36	0.5	4.25	6.62	0.71	1.29	1.31		4.07	3.42	3.27	4.81	3.14	2.63
WBGene00001971	ALG Class 26G	hmg-1.1, Y48B6A.14		0	0	0	0	0.12	0	0	0	0	0	0		0	0	0	0	0	0		0.14	0	0	0	0.1	0.12	0.09	0.1		0.18	0.2	0.26	0.4	0	0
WBGene00001977	ALG Class 26G	hmg-12, Y17G7A.1		0	0	0.13	0.14	0.35	0.07	0.06	0	0.17	0.21	0.58		0.07	0.06	0	0	0	0		0	0.18	0	1	0	0	0.09	0.3		0.18	0.1	0.26	0.15	0.18	0
WBGene00002045	ALG Class 26G	C56C10.8, icd-1		0	0	0.77	1.35	1.1	0	0	0	0	0	0		0	0	0	0	0	0		0	0	0	0.25	0.2	0.12	0	0.1		0.18	0.15	0.26	0.05	0.55	0.61
WBGene00002059	ALG Class 26G	F53A2.6, ife-1		0	0	11.04	10.33	9.46	0	0	0	0	0.21	0		0	0	0	0	0.05	0		0.55	0.09	0	0.5	0.92	0.95	0.46	0.2		1.41	0.55	0.96	0.95	1.29	0.61
WBGene00002064	ALG Class 26G	iff-1, T05G5.10		0	0	3.52	5.77	4.64	0	0.12	0	0	0	0		0	0.12	0	0	0	0.21		0.28	0.27	0.13	3.75	3.06	1.54	1.1	0.91		2.3	2.06	1.67	2.56	2.03	2.22
WBGene00002066	ALG Class 26G	ifg-1, M110.4		0	0	0.38	0.93	0.17	0.07	0	0	0	0	0		0.07	0	0	0	0	0		0	0	0	0	0.1	0.24	0	0		0	0.05	0	0.1	0.18	0
WBGene00002070	ALG Class 26G	ile-1, K07A1.8		0	0	0.83	1.28	1.04	0	0	0	0	0	0		0	0	0	0	0	0		0	0	0	0	0.51	0.24	0.09	0		0	0.2	0.13	0.25	0.18	0.2
WBGene00002074	ALG Class 26G	F32E10.4, ima-3		0	0.06	0.64	0.21	0.46	0	0	0	0	0	0		0	0	0	0	0	0		0	0.09	0	0.25	0.31	0	0.09	0		0	0.1	0.06	0.4	0.18	0.2
WBGene00002083	ALG Class 26G	F57B9.6, inf-1		0	0	0.51	0.39	0.29	0	0	0	0	0	0		0	0	0	0	0	0		0	0.27	0	0.5	0	0	0	0		0	0.3	0.19	0.1	0.37	0
WBGene00002147	ALG Class 26G	C41C4.4, ire-1		0	0	0.9	0.93	0.75	0	0	0	0	0	0		0	0	0	0	0	0		0	0	0.13	0.25	0.2	0.12	0.18	0		0	0.1	0.06	0.25	0	0.2
WBGene00002186	ALG Class 26G	kel-10, T16H12.6		0	0	0.26	1.64	0.58	0	0	0	0	0	0		0	0	0	0	0	0.07		0	0	0	1	0.81	0.12	0.09	0.2		1.77	1.46	1.83	2.51	1.85	0.61
WBGene00002191	ALG Class 26G	B0205.7, kin-3		0	0	0.19	0.43	0	0	0	0	0	0	0		0	0	0	0	0	0.07		0	0	0	0.25	0.1	0	0	0.1		0.35	0.1	0.19	0.1	0.18	0.2
WBGene00002193	ALG Class 26G	kin-5, T13H10.1		0	0	2.05	1.71	1.33	0	0.06	0	0	0	0		0	0.06	0	0	0	0.14		0	0	0.13	0.25	0.51	0	0.18	0.3		0.88	0.86	0.96	0.85	1.29	0.81
WBGene00002198	ALG Class 26G	F22D6.1, kin-14		0	0	1.22	1.57	1.8	0	0.06	0	0	0	0		0	0.06	0	0.07	0	0.14		0	0.18	0	2	1.73	0.47	0.18	0.4		1.41	1.41	1.22	1.35	0.37	1.01
WBGene00002202	ALG Class 26G	C03C10.1, kin-19		0	0	0.32	0.36	0.64	0	0	0	0	0	0.15		0	0	0	0	0	0		0	0	0	0.25	0.2	0.24	0	0		0.18	0.45	0.32	0.8	0.18	0.61
WBGene00002204	ALG Class 26G	kin-21, W08D2.8		0	0	8.39	13.46	14.45	0.07	0.12	0.06	0	0.32	0		0.07	0.12	0.06	0	0.1	0.07		0.28	0.62	0.63	9.25	9.06	1.3	1.56	1.51		3.54	4.78	4.88	5.36	3.88	6.47
WBGene00002206	ALG Class 26G	K07F5.4, kin-24		0	0	5.57	6.12	6.21	0.07	0	0	0	0	0		0.07	0	0	0	0.14	0		0	0	0	1	0.92	0	0	0.1		0.71	0.45	1.09	0.95	0.55	1.01
WBGene00002208	ALG Class 26G	kin-26, T06C10.6		0	0	4.42	7.55	7.25	0.21	0.24	0	0	0.21	0.15		0.21	0.24	0	0	0.05	0.34		0.69	0.62	0.5	3	4.89	1.06	0.64	1.31		3.89	5.08	4.69	6.41	6.1	5.06
WBGene00002212	ALG Class 26G	B0523.1, kin-31		0	0	1.79	1.99	3.25	0	0	0	0	0	0		0	0	0	0.07	0	0.07		0	0	0	1.25	0.61	0.24	0	0.1		0.88	0.6	0.32	0.35	0.92	0
WBGene00002219	ALG Class 26G	K11D9.1, klp-7		0.07	0.06	0.77	1.64	1.91	0.07	0	0	0.17	0.21	0.29		0.07	0	0	0	0	0		0	0.18	0.13	0.5	0.2	0.47	0.18	0.3		0.35	0.2	0.39	0.55	0.55	0
WBGene00002227	ALG Class 26G	klp-17, W02B12.7		0	0	7.17	12.39	13.81	0	0.06	0.06	0	0.11	0		0	0.06	0.06	0	0.05	0.21		0.28	0.09	0	1.25	2.24	0.47	0.64	0.4		1.24	1.21	1.54	2.15	1.48	1.42
WBGene00002229	ALG Class 26G	klp-19, Y43F4B.6		0	0	0	0.5	0.29	0.07	0.12	0.06	1.39	1.37	0.87		0.07	0.12	0.06	0	0	0.14		0.14	0.18	0.38	0	0.41	0	0.09	0		0	0.15	0.06	0.2	0.18	0
WBGene00002231	ALG Class 26G	C02F5.1, knl-1		0	0.06	0.58	1.28	0.23	0	0	0	0.17	0	0		0	0	0	0	0	0.07		0.14	0.09	0	0.25	0.31	0	0	0.2		0	0.2	0.06	0.1	0.18	0.2
WBGene00002250	ALG Class 26G	lap-2, W07G4.4		0	0	0.19	0.64	0.35	0	0	0	0	0	0		0	0	0	0	0	0		0.14	0	0	0	0	0.12	0	0.1		0.35	0.1	0.06	0.2	0.55	0.4
WBGene00002297	ALG Class 26G	ect-2, T19E10.1		0	0	0.32	1.07	0.52	0	0	0	0	0	0		0	0	0	0	0	0.07		0	0	0	0.5	0.2	0.35	0	0.1		0.71	0.4	0.58	0.4	0.37	0.2
WBGene00002344	ALG Class 26G	let-70, M7.1		0	0	0	0.14	0.12	0	0	0	0	0	0		0	0	0	0	0	0		0	0.09	0	0.75	0.51	0	0.37	0.1		1.24	1.21	1.03	1.3	1.11	0.61
WBGene00002694	ALG Class 26G	C10H11.9, let-502		0	0	0.06	0.14	0.17	0	0	0	0.17	0.11	0		0	0	0	0	0	0		0	0	0	0.25	0.2	0.24	0.09	0.1		0	0.1	0	0.2	0	0
WBGene00002783	ALG Class 26G	F57B10.1, let-607		0	0	0.45	0.75	0.73	0	0	0	0	0	0		0	0	0	0	0	0		0	0.09	0	0	0.25	0	0.09	0.05		0.18	0.05	0.1	0.03	0	0.2
WBGene00002855	ALG Class 26G	C05D11.12, let-721		0	0	1.66	1.5	1.45	0	0	0	0	0	0		0	0	0	0	0	0.07		0	0	0	0	0.1	0.12	0.09	0.1		1.06	0.96	1.09	1.1	0.92	0.4
WBGene00002879	ALG Class 26G	C29E4.8, let-754		0	0	0.51	2.14	1.74	0	0	0	0	0.11	0		0	0	0	0	0	0.07		0.28	0.18	0	0	0.71	0.12	0.18	0.2		0.35	0.75	0.77	1.15	1.66	1.42
WBGene00003019	ALG Class 26G	H32C10.2, lin-33		0	0	0.51	0.85	1.04	0	0	0	0	0	0		0	0	0	0	0	0		0	0	0	0.5	0.41	0.12	0.18	0.2		0	0.3	0.39	0.6	0.55	0.4
WBGene00003041	ALG Class 26G	lin-61, R06C7.7		0	0.06	0.32	2.21	1.86	0.21	0.12	0	0	0.11	0		0.21	0.12	0	0	0.19	0.07		0.41	0.09	0.13	4.25	5.3	1.42	1.19	1.41		4.24	4.28	3.79	5.71	4.62	4.65
WBGene00003068	ALG Class 26G	lrk-1, T27C10.6		0	0	0	0	0	0	0	0	0	0	0		0	0	0	0	0	0		0	0	0	0	0	0	0	0		0	0	0	0	0	0
WBGene00003162	ALG Class 26G	F20H11.3, mdh-2		0	0	2.24	2.28	2.2	0	0	0	0	0	0		0	0	0	0	0.14	0		0.14	0	0.13	0.25	0.61	0.35	0.55	0.5		0.88	1.11	1.09	1.3	0.55	0.4
WBGene00003424	ALG Class 26G	F26G1.7, msp-3		0.03	0	3.17	3.88	4.45	0.06	0.03	0.08	0	0.16	0		0.06	0.03	0.08	0.04	0.13	0.07		0.17	0.1	0.13	2.12	1.56	0.23	0.32	0.25		1.14	0.71	0.74	1.12	0.51	0.87
WBGene00003425	ALG Class 26G	K07F5.2, msp-10		0	0	3.65	5.09	5.58	0.06	0	0.01	0	0.02	0		0.06	0	0.01	0.01	0.09	0.13		0.19	0.11	0.16	2.34	2.43	0.28	0.48	0.45		1.06	1.13	1.23	1.48	1	1.35
WBGene00003426	ALG Class 26G	F36H12.7, msp-19		0	0	2.64	5.11	4.54	0.01	0.09	0	0	0.06	0		0.01	0.09	0	0.05	0.01	0.06		0.09	0.03	0.03	0.96	1.83	0.33	0.22	0.28		0.81	0.68	1.23	1.21	1.26	1
WBGene00003431	ALG Class 26G	msp-33, R05F9.8		0	0	6.28	8.47	9.1	0.11	0.04	0.01	0	0.07	0		0.11	0.04	0.01	0.07	0.05	0.41		0.15	0.01	0.05	4.17	3.27	0.26	0.68	0.53		1.6	1.34	1.19	1.46	1.43	1.65
WBGene00003432	ALG Class 26G	C04G2.4, msp-36		0	0	5.46	7.11	7.85	0.11	0	0.05	0	0.04	0		0.11	0	0.05	0.03	0.05	0.1		0.2	0.16	0.13	3.04	2.26	0.43	0.45	0.94		1.11	1.43	1.27	1.43	0.99	1.55
WBGene00003434	ALG Class 26G	K08F4.8, msp-38		0.03	0	4.31	5.79	6.44	0.03	0.01	0.05	0	0.04	0		0.03	0.01	0.05	0.03	0.12	0.16		0.02	0.13	0.15	2.78	1.8	0.65	0.47	1.08		0.84	0.79	0.77	1.12	0.7	1.31
WBGene00003435	ALG Class 26G	C33F10.9, msp-40		0	0	5.85	8.62	8.21	0.07	0.03	0	0	0.07	0		0.07	0.03	0	0.11	0.17	0.2		0.07	0.13	0.17	3.01	1.98	0.23	0.44	0.53		1.53	0.98	1.15	1.26	1.6	1.58
WBGene00003442	ALG Class 26G	C34F11.6, msp-49		0	0	2.66	3.55	3.08	0.01	0.03	0.18	0.17	0.11	0		0.01	0.03	0.18	0.01	0.1	0.08		0.16	0.32	0	1.4	2.32	0.53	0.23	0.16		0.75	1.1	0.8	1.17	1.54	1.2
WBGene00003443	ALG Class 26G	C34F11.4, msp-50		0	0	1.59	3.16	2.78	0.03	0.1	0.02	0.03	0.04	0		0.03	0.1	0.02	0.04	0.07	0.2		0.02	0.01	0.01	1.11	2.36	0.17	0.35	0.49		0.67	0.66	0.87	0.75	1.15	0.74
WBGene00003444	ALG Class 26G	msp-51, ZK354.5		0	0	2.83	4	4.3	0.01	0.06	0	0.03	0.06	0		0.01	0.06	0	0.05	0.04	0.06		0.16	0.05	0.08	1.47	1.42	0.27	0.15	0.27		0.57	0.61	0.69	0.72	1.06	0.67
WBGene00003446	ALG Class 26G	msp-53, R13H9.4		0	0	2.83	4.59	4.23	0.01	0.03	0	0.03	0.1	0		0.01	0.03	0	0.05	0.04	0.05		0.09	0.05	0.05	1	1.44	0.27	0.18	0.21		1.1	0.95	0.82	1.38	1.69	1.2
WBGene00003448	ALG Class 26G	C09B9.6, msp-55		0	0	2.48	3.57	3.49	0.11	0.02	0	0	0.04	0		0.11	0.02	0	0.05	0.02	0.05		0.1	0.03	0.03	0.42	0.79	0.15	0.23	0.23		1.18	0.75	0.42	0.79	1.02	0.65
WBGene00003449	ALG Class 26G	K07F5.3, msp-56		0	0	4.75	7.52	7.72	0.02	0	0.02	0	0.02	0		0.02	0	0.02	0.03	0.07	0.1		0.07	0.12	0.1	3.21	3.02	0.37	0.48	0.48		1.26	1.21	1.28	1.53	1.33	1.41
WBGene00003450	ALG Class 26G	msp-57, R13H9.2		0.03	0	3.77	5.12	5.73	0.01	0.03	0.06	0.03	0.04	0		0.01	0.03	0.06	0.05	0.06	0.08		0.08	0.06	0.15	1.38	1.41	0.3	0.28	0.29		1.58	1.26	1.11	1.51	1.91	1.47
WBGene00003452	ALG Class 26G	msp-59, ZK354.11		0	0	2.46	3.88	3.73	0.01	0.08	0	0	0.04	0		0.01	0.08	0	0.05	0.01	0.05		0.05	0.03	0.03	0.85	1.08	0.35	0.22	0.28		0.4	0.59	0.51	0.56	0.99	0.24
WBGene00003458	ALG Class 26G	msp-65, ZK354.1		0	0	3.41	4.58	4.71	0.04	0.02	0	0	0	0		0.04	0.02	0	0.01	0.05	0.12		0.17	0.04	0.05	1.41	1.19	0.28	0.1	0.34		1.12	0.99	0.83	1.17	1.34	0.59
WBGene00003463	ALG Class 26G	msp-76, ZK1251.6		0.03	0	6.19	5.74	7.19	0.02	0.06	0.01	0	0	0		0.02	0.06	0.01	0.03	0.06	0.11		0.07	0.07	0.23	2.3	2.54	0.46	0.25	0.5		0.85	1.44	1.63	1.18	1.81	1.78
WBGene00003464	ALG Class 26G	F32B6.6, msp-77		0	0	3.88	5.33	4.5	0.02	0	0.01	0	0	0		0.02	0	0.01	0.03	0.04	0.12		0.13	0.24	0.08	1.96	1.92	0.26	0.36	0.46		1.08	1.04	0.86	1.22	0.91	1.44
WBGene00003465	ALG Class 26G	msp-78, T13F2.11		0	0	3.77	4.84	5.02	0.01	0	0.01	0	0	0		0.01	0	0.01	0.03	0.07	0.07		0.08	0.09	0.08	2.38	1.67	0.31	0.28	0.38		0.83	0.75	0.7	0.98	0.97	0.99
WBGene00003467	ALG Class 26G	K07F5.1, msp-81		0	0	4.89	5.74	7.71	0.04	0	0.01	0	0.02	0		0.04	0	0.01	0.08	0.05	0.17		0.2	0.16	0.25	2.83	3.4	0.6	0.48	0.99		3.85	2.65	2.68	3.79	3.35	3.76
WBGene00003469	ALG Class 26G	K05F1.2, msp-142		0	0	2.31	2.58	4.12	0.04	0.05	0.02	0.03	0.02	0		0.04	0.05	0.02	0.03	0.04	0.26		0.03	0.04	0.01	2.61	2.23	0.44	0.32	0.26		0.99	0.84	0.92	0.82	1.33	2.15
WBGene00003470	ALG Class 26G	msp-152, ZK546.6		0	0	3.81	5.62	6.57	0.1	0.08	0.03	0.03	0.06	0		0.1	0.08	0.03	0.05	0.08	0.21		0.07	0.08	0.02	2.54	2.23	0.28	0.32	0.21		0.55	0.8	0.69	0.81	1	0.83
WBGene00003562	ALG Class 26G	F09G8.4, ncr-2		0	0	9.47	18.02	15.95	0.07	0.06	0	0.17	0.11	0		0.07	0.06	0	0	0.05	0.34		0.28	0.8	0.25	5.25	3.56	1.18	1.01	1.01		4.6	5.28	3.98	6.52	4.44	5.46
WBGene00003576	ALG Class 26G	ndc-80, W01B6.9		0.07	0	0.13	0.07	0.06	0.07	0.06	0	0	0.21	0		0.07	0.06	0	0	0	0		0.28	0	0.13	0.25	0.31	0	0.09	0.1		0	0.05	0.06	0	0	0.2
WBGene00003579	ALG Class 26G	ndx-2, W02G9.1		0	0.13	1.86	1.64	1.74	0	0	0.06	0	0.11	0		0	0	0.06	0.07	0.1	0		0	0	0	0.75	0.81	0.12	0.18	0		0.53	0.56	0.26	0.6	0.37	0.4
WBGene00003587	ALG Class 26G	F45H11.2, ned-8		0	0	0.32	1.21	0.7	0	0	0	0	0	0		0	0	0	0	0	0		0	0	0	0.5	0.2	0	0.09	0.1		0.35	0.35	0.32	0.25	0.18	0.61
WBGene00003742	ALG Class 26G	F59C6.6, nlp-4		0	0	0.26	0.64	0.35	0	0	0	0	0	0		0	0	0	0	0	0		0	0	0	0.25	0.41	0	0	0.1		0.18	0.15	0.39	0.25	0.18	0.4
WBGene00003831	ALG Class 26G	C09H10.3, nuo-1		0	0	1.28	0.71	0.99	0	0	0	0	0.11	0		0	0	0	0	0.05	0.14		0	0	0	0.25	0.31	0	0.09	0.1		0	0.25	0.13	0.25	0.18	0.2
WBGene00003864	ALG Class 26G	C09G9.6, oma-1		0	0	0.26	0.36	0.41	0	0	0	0	0	0		0	0	0	0	0	0		0	0	0	0	0.1	0	0.18	0		0	0.1	0.13	0.2	0.37	0.2
WBGene00003902	ALG Class 26G	pab-1, Y106G6H.2		0	0.06	4.16	5.91	6.09	0	0.06	0.12	0.35	0.21	0.15		0	0.06	0.12	0.14	0	0		0.14	0.27	0.25	0.25	1.12	0	0.28	0.1		0.18	0.3	0.58	0.45	0.37	0.4
WBGene00003906	ALG Class 26G	paf-1, W03G9.6		0	0	0	0.14	0.06	0	0	0	0	0	0		0	0	0	0	0	0		0	0	0	0.75	0.2	0	0.09	0		0.35	0.45	0.26	0.25	0.37	0.2
WBGene00003920	ALG Class 26G	M117.2, par-5		0	0	0.64	0.36	0.93	0	0	0	0	0.11	0		0	0	0	0	0	0.14		0	0.09	0	0.25	0.2	0.12	0.09	0		0.53	0.4	0.51	0.5	0.55	0.61
WBGene00003922	ALG Class 26G	C15H11.7, pas-1		0	0	0.38	0.21	0.52	0	0	0	0	0.21	0.15		0	0	0	0	0	0		0	0	0	0	0.41	0.12	0.18	0		0	0.1	0.06	0.1	0	0
WBGene00003924	ALG Class 26G	pas-3, Y110A7A.14		0	0	0	0.07	0.17	0	0	0	0	0	0		0	0	0	0	0	0		0	0	0	0	0	0.12	0	0.1		0.35	0.2	0	0.25	0	0
WBGene00003925	ALG Class 26G	C36B1.4, pas-4		0	0	0.58	0.36	0.81	0	0	0	0	0	0		0	0	0	0	0	0		0	0	0	0.25	0.2	0	0.09	0.1		0.18	0.2	0	0.25	0.37	0
WBGene00003926	ALG Class 26G	F25H2.9, pas-5		0	0	1.15	2.07	1.16	0	0	0	0	0.11	0		0	0	0	0.07	0	0.07		0	0.09	0.13	1	0.61	0.12	0.09	0		0.35	0.35	0.32	0.4	0.37	0.4
WBGene00003927	ALG Class 26G	CD4.6, pas-6		0	0	0	0.36	0.23	0.07	0	0	0	0	0		0.07	0	0	0	0	0		0	0	0	0	0.41	0.12	0.09	0		0.35	0.2	0.13	0.35	0.55	0
WBGene00003928	ALG Class 26G	pas-7, ZK945.2		0	0	0	0.85	0.87	0	0	0	0	0	0		0	0	0	0	0	0		0	0	0.13	0.25	0.2	0.24	0	0		0	0.15	0.13	0.1	0.18	0.2
WBGene00003947	ALG Class 26G	K08D12.1, pbs-1		0	0	0.58	0.43	0.29	0	0	0	0	0	0		0	0	0	0	0	0.07		0	0	0	0.5	0.31	0.24	0.09	0		1.06	0.15	0.32	0.5	0.37	0
WBGene00003948	ALG Class 26G	C47B2.4, pbs-2		0	0	0.64	0.5	0.58	0	0	0	0	0	0		0	0	0	0	0	0		0.28	0	0	0	0.31	0.35	0.09	0.2		0.35	0.4	0.45	0.4	0.55	0
WBGene00003949	ALG Class 26G	pbs-3, Y38A8.2		0	0.06	0.19	0.14	0.06	0	0	0	0	0	0		0	0	0	0	0	0		0	0	0	0	0.51	0	0	0		0.18	0.2	0.19	0.25	0.18	0
WBGene00003951	ALG Class 26G	K05C4.1, pbs-5		0	0	0	0.28	0.41	0	0	0	0	0	0.29		0	0	0	0	0	0		0	0	0.38	0.25	0.2	0.24	0	0.2		0.88	0.65	0.32	0.45	0.18	0.81
WBGene00003952	ALG Class 26G	C02F5.9, pbs-6		0	0	0.26	0.21	0.17	0	0	0	0	0	0		0	0	0	0	0	0		0	0	0	0.25	0.31	0.12	0.37	0.2		0.88	0.4	0.51	0.85	0.55	0.2
WBGene00003953	ALG Class 26G	F39H11.5, pbs-7		0	0	0.19	0	0.12	0	0	0	0	0	0		0	0	0	0	0	0		0	0	0	0.25	0.2	0.35	0	0.2		0.88	1.21	0.9	0.6	0.37	0.61
WBGene00003964	ALG Class 26G	H06O01.1, pdi-3		0	0	4.03	7.26	6.21	0	0.06	0	0	0	0		0	0.06	0	0	0	0		0.14	0.18	0.25	1.5	1.83	0.47	0.83	0.61		0.18	0.15	0.39	0.35	0	0.2
WBGene00003989	ALG Class 26G	pfn-1, Y18D10A.20		0	0	0.13	1	0.81	0	0	0	0	0.11	0		0	0	0	0	0	0		0	0	0	0	0.2	0.24	0.09	0.5		0.18	0.5	0.45	0.4	0.74	0.81
WBGene00003992	ALG Class 26G	pgl-1, ZK381.4		0	0.06	0.13	0.07	0.29	0	0	0	0.17	0	0		0	0	0	0	0.05	0		0	0	0	0	0.2	0	0.28	0.1		0.18	0.05	0.19	0	0	0
WBGene00003994	ALG Class 26G	C18G1.4, pgl-3		0	0	0.7	1.71	1.57	0	0.06	0	0	0	0		0	0.06	0	0	0	0.07		0	0.18	0	0.5	0.71	0.12	0.46	0.2		0.71	0.86	0.96	1.15	0.74	0.81
WBGene00004042	ALG Class 26G	C14B9.4, plk-1		0	0	1.41	2.21	2.73	0	0	0.12	0.17	0.32	0.44		0	0	0.12	0	0	0		0.14	0.09	0	0.75	0.51	0.35	0.18	0.1		0.88	0.3	0.64	0.5	0.18	0
WBGene00004044	ALG Class 26G	F55G1.8, plk-3		0	0	0.13	0.28	0.35	0	0	0	0	0	0		0	0	0	0	0	0		0.28	0.09	0	0.25	0.31	0.12	0	0.1		0.35	0.25	0.06	0.15	0.18	0.2
WBGene00004046	ALG Class 26G	F45E4.2, plp-1		0	0	0.32	0.18	0.35	0	0	0	0	0	0		0	0	0	0	0	0.07		0.07	0	0	0.13	0.1	0.06	0	0.2		0.09	0.28	0.39	0.23	0	0.2
WBGene00004084	ALG Class 26G	C29E6.3, pph-2		0	0	1.31	1.64	2.2	0	0	0	0	0	0		0	0	0	0.07	0.05	0.07		0	0.18	0	0.25	0.71	0.06	0.05	0		0.18	0.3	0.45	0.43	0.65	0.71
WBGene00004109	ALG Class 26G	C34G6.7, stam-1		0	0	0.32	0.28	0.35	0	0	0	0.17	0	0		0	0	0	0	0	0.14		0	0	0	0.25	0.31	0	0	0.2		0.71	0.55	0.45	0.7	0.55	1.42
WBGene00004178	ALG Class 26G	D2030.6, prg-1		0.07	0.13	0.51	0.78	0.64	0	0	0.06	0.35	0.11	0		0	0	0.06	0	0	0		0.14	0.27	0.25	0.5	0.41	0.12	0	0.1		0	0.3	0.19	0.2	0	0.2
WBGene00004208	ALG Class 26G	ptc-1, ZK675.1		0	0	0.45	0.5	0.81	0	0	0	0.52	0.11	0.15		0	0	0	0	0	0		0	0	0.25	0.75	0.41	0.24	0	0.3		0.18	0.15	0.13	0.3	0.55	0.2
WBGene00004242	ALG Class 26G	F18A11.1, puf-6		0	0.02	0.28	0.14	0.14	0	0	0	0	0	0		0	0	0	0	0.01	0		0	0.1	0.04	0.33	0.07	0.04	0	0.1		0	0.12	0	0.03	0.18	0
WBGene00004243	ALG Class 26G	B0273.2, puf-7		0	0.02	0.15	0.18	0.28	0	0	0	0	0	0		0	0	0	0	0.01	0		0	0.1	0.04	0.08	0.12	0	0	0.07		0	0.07	0.06	0.08	0	0
WBGene00004266	ALG Class 26G	C39F7.4, rab-1		0	0	0.38	0.71	0.41	0.07	0	0	0.17	0	0		0.07	0	0	0	0.05	0		0	0	0	0	0.31	0	0	0		1.41	1.36	1.09	1.25	1.66	1.01
WBGene00004269	ALG Class 26G	F59B2.7, rab-6.1		0	0	0.26	0.43	0.7	0	0	0	0	0	0		0	0	0	0	0	0		0	0	0	0	0.1	0	0.09	0		0.18	0.2	0.06	0.15	0	0
WBGene00004274	ALG Class 26G	F53G12.1, rab-11.1		0	0.06	0.7	0.85	1.1	0	0	0	0	0	0		0	0	0	0	0	0		0	0	0.13	0.25	0.51	0	0	0		0.35	0.4	0.26	0.55	0.55	0
WBGene00004302	ALG Class 26G	K01G5.4, ran-1		0	0.06	0.58	1.14	0.99	0	0	0	0.17	0	0.15		0	0	0	0	0	0		0	0	0	0.5	0.2	0.24	0.28	0.4		0.35	0.15	0.32	0.3	0.74	0.2
WBGene00004310	ALG Class 26G	C44C11.1, ras-1		0.07	0	0	0	0	0	0	0	0	0	0		0	0	0	0	0	0		0	0	0	0	0	0	0	0		0	0	0	0	0	0
WBGene00004320	ALG Class 26G	rbx-1, ZK287.5		0.07	0	1.09	0.71	0.58	0.21	0	0	0	0.11	0		0.21	0	0	0	0	0		0.55	0.09	0	1.25	0.71	0.35	0.18	0.1		1.06	0.7	0.71	1	1.48	1.21
WBGene00004373	ALG Class 26G	rme-1, W06H8.1		0	0	0.58	0.43	0.46	0.07	0	0	0	0	0		0.07	0	0	0.07	0.05	0		0	0	0	0.75	0.2	0.12	0.09	0.2		0.88	1.16	1.03	1.55	0.92	1.21
WBGene00004439	ALG Class 26G	F52B5.6, rpl-25.2		0	0	1.09	1.14	1.33	0	0	0	0	0	0		0	0	0	0	0	0.21		0	0	0	0	0.1	0.12	0	0		0.18	0.15	0.26	0.2	0.18	0
WBGene00004458	ALG Class 26G	rpn-1, T22D1.9		0	0	0.83	0.36	0.29	0	0	0	0	0	0		0	0	0	0	0	0.14		0.14	0	0	0	0.51	0.12	0.18	0.1		0	0.2	0.51	0.35	0.18	0.2
WBGene00004460	ALG Class 26G	C30C11.2, rpn-3		0	0	0.58	0.78	0.87	0	0	0	0	0	0		0	0	0	0	0	0		0.14	0	0	0	0.41	0.12	0	0.2		0.71	0.5	0.26	0.45	0.92	0.4
WBGene00004461	ALG Class 26G	F10G7.8, rpn-5		0	0	0.06	0.43	0.35	0	0	0	0	0	0		0	0	0	0	0	0		0	0.09	0	0	0.41	0	0	0.2		0.18	0.7	0.39	0.65	0.37	0.2
WBGene00004464	ALG Class 26G	R12E2.3, rpn-8		0	0	0.45	0.71	0.52	0	0	0	0	0	0.15		0	0	0	0	0	0		0	0	0	0.25	0.61	0.12	0	0		0.35	0.5	0.58	0.3	1.29	0.81
WBGene00004465	ALG Class 26G	rpn-9, T06D8.8		0.07	0	1.22	1.42	2.78	0	0.06	0	0.35	0	0.29		0	0.06	0	0	0	0		0.14	0	0	1.5	0.61	0	0.09	0.1		0.71	1.16	0.71	1.2	0.37	0.81
WBGene00004466	ALG Class 26G	B0205.3, rpn-10		0	0	0.7	1.57	1.39	0	0.12	0.06	0.35	0	0		0	0.12	0.06	0	0	0.07		0.14	0.09	0	1.25	1.73	0.24	0	0.2		1.41	1.56	1.67	2.15	1.66	1.42
WBGene00004468	ALG Class 26G	rpn-12, ZK20.5		0	0	1.15	1.35	1.33	0	0	0	0	0	0		0	0	0	0	0	0.14		0	0	0	1	0.71	0.24	0.46	0.1		1.41	0.91	0.64	1.5	1.85	1.01
WBGene00004469	ALG Class 26G	B0393.1, rps-0		0	0	0.19	0.64	0.81	0	0	0	0	0	0		0	0	0	0	0	0		0.14	0	0	0.5	1.12	0	0.18	0.2		1.77	1.11	1.67	1.3	1.85	1.82
WBGene00004487	ALG Class 26G	rps-18, Y57G11C.16		0	0	0.26	0.71	0.75	0	0	0	0	0	0		0	0	0	0	0	0.07		0	0	0	0	0.1	0	0	0		0.18	0.1	0.06	0.25	0.18	0.4
WBGene00004501	ALG Class 26G	C52E4.4, rpt-1		0	0	0.51	0	0.35	0	0	0	0	0	0		0	0	0	0	0	0		0	0	0	0.25	0.31	0	0.37	0		0	0.15	0.45	0.4	0.55	0
WBGene00004502	ALG Class 26G	F29G9.5, rpt-2		0	0	0.45	0.78	0.81	0	0	0	0	0	0		0	0	0	0	0	0.07		0	0	0	0	0.2	0	0	0		0.35	0.2	0.19	0.2	0	0
WBGene00004504	ALG Class 26G	F23F1.8, rpt-4		0	0	0.77	0.71	1.33	0	0	0	0	0	0		0	0	0	0	0	0		0	0	0.13	0.5	0.61	0.12	0.09	0.1		0.35	0.35	0.58	0.3	0.55	0.4
WBGene00004505	ALG Class 26G	F56H1.4, rpt-5		0	0	0.83	0.21	1.22	0	0	0	0	0.11	0		0	0	0	0	0.05	0.07		0.55	0	0	0.25	0.61	0.35	0.18	0.2		1.24	0.75	1.03	1.1	0.74	0.61
WBGene00004698	ALG Class 26G	rsp-1, W02B12.3		0	0	0.96	1.07	0.75	0	0	0	0	0	0		0	0	0	0.14	0	0		0	0.09	0	0.5	0.2	0.12	0.09	0		0.18	0.15	0.32	0.55	0	0.4
WBGene00004700	ALG Class 26G	rsp-3, Y111B2A.18		0	0.06	2.05	2.56	3.95	0	0	0	0.17	0.11	0		0	0	0	0	0	0		0.28	0	0.13	0.5	0.92	0.24	0.09	0.4		0.18	0.81	0.39	0.4	0.37	0
WBGene00004703	ALG Class 26G	C33H5.12, rsp-6		0	0	0.06	1.71	2.03	0	0	0	0	0	0.15		0	0	0	0	0	0		0	0.27	0	0	0.1	0.12	0	0		0	0.25	0.26	0.7	0.37	0
WBGene00004705	ALG Class 26G	C18D11.4, rsp-8		0	0	0.06	0.36	0.52	0	0.06	0	0	0	0		0	0.06	0	0	0	0		0	0.09	0	0	0.1	0	0.09	0		0.18	0.1	0.13	0.2	0.37	0
WBGene00004737	ALG Class 26G	F10G7.4, scc-1		0.07	0.13	0.06	1	0.41	0.07	0	0	0.35	0.32	0.29		0.07	0	0	0.07	0	0		0.69	0.44	0.25	0	0.71	0.83	0.09	0.1		0.18	0.55	0.71	0.4	0.55	0.81
WBGene00004759	ALG Class 26G	F45D3.5, sel-1		0	0	1.54	1.07	1.1	0	0	0	0	0.21	0		0	0	0	0	0	0		0	0	0.25	0	0.51	0.12	0	0.2		0.35	0.3	0.39	0.45	0.55	0.81
WBGene00004768	ALG Class 26G	F55A11.3, sel-11		0	0	0.51	1.64	1.8	0	0	0	0	0	0		0	0	0	0	0	0		0	0	0	0.5	0.41	0.12	0.09	0		0.35	0.45	0.45	0.55	0.18	0.61
WBGene00004798	ALG Class 26G	F43D9.4, sip-1		0.07	0	0	0	0	0	0	0	0	0.11	0		0	0	0	0	0.05	0		0	0	0	0	0.41	0	0.09	0.1		0.18	0.3	0.32	0.1	0.55	0.61
WBGene00004808	ALG Class 26G	F46A9.4, skr-2		0	0	0.19	0.71	0.64	0	0	0	0	0	0		0	0	0	0	0	0		0	0.09	0	0.25	0	0	0	0		0	0.1	0	0.1	0	0
WBGene00004888	ALG Class 26G	K12C11.2, smo-1		0	0	0.7	0.57	0.7	0	0	0	0	0	0		0	0	0	0	0	0		0	0.09	0	0	0	0	0	0		0.35	0.25	0.64	0.55	0.37	0.4
WBGene00004901	ALG Class 26G	F55H12.1, snf-2		0	0	2.5	4.27	3.71	0	0.06	0	0	0.21	0		0	0.06	0	0	0	0.07		0.14	0	0	1.5	1.32	0.47	0.46	0.81		2.12	1.71	2.57	1.85	2.59	2.63
WBGene00004904	ALG Class 26G	snf-5, Y46G5A.30		0	0	0.26	1.35	0.99	0	0	0	0	0	0		0	0	0	0	0.05	0		0.14	0	0.13	0	0.31	0.12	0	0		0	0.2	0.13	0.5	0.92	0.2
WBGene00004908	ALG Class 26G	C49C3.1, snf-9		0	0	1.22	2.81	2.67	0.14	0	0.06	0	0	0		0.14	0	0.06	0	0	0.21		0	0.09	0	2.25	1.88	0.24	1.19	1.16		2.74	2.19	1.93	2.15	1.85	1.72
WBGene00004909	ALG Class 26G	snf-10, Y32F6A.2		0	0	1.73	1.35	2.84	0.14	0.06	0	0	0.11	0		0.14	0.06	0	0.07	0.05	0		0	0	0	1.75	2.44	0.47	0.55	0.2		1.24	1.41	0.71	1.6	2.03	1.21
WBGene00004930	ALG Class 26G	C15F1.7, sod-1		0	0	0.51	0.78	0.99	0	0	0	0	0	0		0	0	0	0	0	0		0.28	0.09	0	1	0.41	0	0.09	0.1		0.18	0.4	0.45	0.5	0.18	0
WBGene00004931	ALG Class 26G	F10D11.1, sod-2		0	0.06	0.06	0.21	0.23	0	0	0	0	0	0		0	0	0	0	0	0		0	0	0	0	0.2	0	0	0		0	0	0.06	0.05	0	0
WBGene00004953	ALG Class 26G	F32H2.3, spd-2		0.07	0	1.15	0.78	1.16	0	0	0	0	0	0		0	0	0	0.07	0	0.07		0	0	0.13	1	0.61	0.12	0.37	0.1		0.35	0.75	0.45	0.35	0.37	0.61
WBGene00004958	ALG Class 26G	spe-4, ZK524.1		0	0	1.86	0.64	2.84	0	0.06	0	0	0	0		0	0.06	0	0	0	0		0.14	0.18	0	1.25	1.53	0.35	0.18	0		0.71	0.96	0.9	1.45	1.11	1.82
WBGene00004959	ALG Class 26G	spe-5, Y110A7A.12		0	0	1.41	1.5	2.26	0	0	0	0	0	0		0	0	0	0	0	0		0.14	0	0.13	0.5	0.41	0	0.09	0		0.35	0.3	0.13	0.2	0	0.4
WBGene00004960	ALG Class 26G	spe-6, Y66D12A.20		0	0	2.43	2.85	3.31	0	0	0	0	0.11	0		0	0	0	0	0	0.07		0	0.27	0.25	2	1.83	0.24	0.18	0.1		3.54	2.11	2.31	2.76	1.66	3.64
WBGene00004964	ALG Class 26G	AC3.10, spe-10		0	0	5.31	9.9	9.46	0.28	0.06	0	0	0.11	0		0.28	0.06	0	0.07	0.05	0.55		0.41	0.09	0.13	3	3.26	0.59	0.83	1.31		2.83	3.47	2.76	3.41	1.85	2.02
WBGene00004965	ALG Class 26G	F48C1.7, spe-11		0	0	1.86	3.56	3.48	0	0.06	0	0	0	0		0	0.06	0	0	0.1	0.21		0.41	0	0.25	1.75	2.24	0.59	0.28	0.2		1.06	2.01	1.86	1.95	2.03	3.24
WBGene00004971	ALG Class 26G	spe-17, ZK617.3		0	0	4.99	3.42	4.93	0	0	0	0	0	0		0	0	0	0	0	0.07		0.14	0.09	0	0.5	0.61	0.24	0.46	0.2		1.24	0.45	1.35	1	1.29	1.82
WBGene00004972	ALG Class 26G	R10H10.2, spe-26		0	0	0.83	2.63	2.67	0.07	0.06	0	0	0	0		0.07	0.06	0	0	0	0.14		0	0	0	1.25	2.24	0.12	0.37	0.4		0.35	0.86	0.51	1.25	0.74	0.4
WBGene00004973	ALG Class 26G	C06E7.6, spe-27		0	0	0	0.07	0	0	0	0	0	0	0		0	0	0	0	0	0.07		0.14	0	0	0.25	0.41	0.12	0	0		0.71	0.15	0.45	0.5	0.55	0.81
WBGene00004975	ALG Class 26G	spe-39, ZC404.3		0	0	0.96	1.57	2.73	0	0	0	0	0	0		0	0	0	0	0	0.07		0.28	0	0.13	1	1.53	0.12	0.28	0.3		0.71	0.4	0.39	0.6	0.37	0.4
WBGene00004976	ALG Class 26G	K01A11.4, spe-41		0	0	2.3	3.13	3.07	0.07	0	0	0	0	0		0.07	0	0	0.14	0.05	0.07		0	0	0	0.25	1.12	0.24	0.09	0.2		0	0.6	0.51	0.2	0.92	0
WBGene00005011	ALG Class 26G	F26F4.8		0	0	1.28	1.92	1.39	0	0	0	0	0	0		0	0	0	0	0.05	0		0	0	0	0	0.71	0	0	0.1		0.88	0.35	0.51	0.55	0.92	0.2
WBGene00005012	ALG Class 26G	F26F4.2		0	0	5.06	10.11	10.91	0.21	0.06	0.06	0	0.11	0		0.21	0.06	0.06	0.21	0.19	0.34		0.28	0.27	0.5	3.25	1.83	0.24	0.74	0.81		2.65	2.34	3.21	3.16	2.22	2.63
WBGene00005019	ALG Class 26G	D2096.4, sqv-1		0	0	0.19	0.71	1.1	0.07	0	0	0	0.11	0		0.07	0	0	0	0	0		0	0	0	0.5	0.2	0	0.18	0.1		0.35	0.4	0.51	0.6	0.55	0.2
WBGene00006038	ALG Class 26G	E03H12.10, ssp-9		0	0	3.1	4.54	5.23	0.02	0	0	0	0.05	0		0.02	0	0	0.06	0.05	0.06		0.46	0.18	0.19	1.29	1.46	0.69	0.2	0.45		2.93	2.14	3.17	2.77	3.71	3.12
WBGene00006039	ALG Class 26G	K07F5.9, ssp-10		0	0	4.79	6.05	9.13	0.2	0.06	0	0	0.16	0		0.2	0.06	0	0.23	0.13	0.14		0.41	0.4	0.13	4.83	4.06	0.98	0.69	0.71		2.76	2.84	3.66	4.51	3.34	4.7
WBGene00006040	ALG Class 26G	ssp-11, T28H11.6		0	0	3.49	4.68	5.29	0.02	0	0	0	0.05	0		0.02	0	0	0.06	0.05	0.06		0.46	0.18	0.19	1.54	1.56	0.69	0.2	0.56		2.93	2.19	3.11	2.77	3.9	3.12
WBGene00006044	ALG Class 26G	ssp-16, T27A3.3		0	0	34.57	50.35	52.22	0.56	0.12	0.17	0	0.85	0		0.56	0.12	0.17	0.28	0.55	0.62		1.1	0.62	0.38	12.25	11.61	2.95	1.93	2.63		7.25	8.76	8.86	13.78	9.42	12.94
WBGene00006047	ALG Class 26G	C55C2.2, ssp-19		0	0	0.87	2.39	1.19	0	0	0	0	0	0		0	0	0	0	0.03	0.09		0.32	0.09	0	2.08	0.71	0.12	0.15	0.2		1.64	1.29	1.58	1.82	1.52	1.8
WBGene00006048	ALG Class 26G	ssp-31, ZK1225.6		0	0	2.21	2.14	3.13	0.07	0.12	0	0	0	0		0.07	0.12	0	0	0.14	0.14		0.21	0	0.13	10.5	10.18	1.65	1.56	2.52		3.36	4.08	2.79	4.01	3.51	3.54
WBGene00006049	ALG Class 26G	F32B6.7, ssp-32		0	0	1.18	1.74	1.14	0	0	0	0	0.05	0		0	0	0	0	0.05	0.03		0.07	0	0	0.33	0.36	0.06	0.05	0.2		0.24	0.37	0.5	0.38	0.28	0.4
WBGene00006050	ALG Class 26G	K07F5.11, ssq-1		0	0	7.36	9.83	9.78	0.14	0.24	0.12	0	0.42	0.15		0.14	0.24	0.12	0.07	0.1	0.34		0.55	0.62	0.76	3.5	5.4	1.3	1.1	1.31		5.22	4.13	4.91	6.16	4.62	4.65
WBGene00006051	ALG Class 26G	ssq-2, T28H11.5		0	0	2.11	2.71	3.1	0.14	0.24	0.06	0	0	0		0.14	0.24	0.06	0.14	0.1	0		0.41	0.09	0.13	1.75	1.94	0.24	0.28	0.81		3.1	1.71	2.02	2.76	2.96	2.83
WBGene00006053	ALG Class 26G	ssq-4, T28H11.1		0	0	1.66	2.42	2.32	0.18	0.09	0.2	0	0	0		0.18	0.09	0.2	0.11	0.07	0.17		0.21	0.13	0.06	1.63	1.07	0.47	0.28	0.35		1.5	1.48	1.73	1.35	2.22	1.52
WBGene00006058	ALG Class 26G	F54C1.9, sst-20		0	0	0.77	1.6	1.48	0	0	0	0	0	0		0	0	0	0	0.05	0.07		0.14	0	0	0.38	0.1	0	0.32	0.05		0.27	0.33	0.29	0.45	0.74	0.1
WBGene00006059	ALG Class 26G	F54C9.2, stc-1		0	0	1.47	1.71	0.75	0	0	0	0	0	0		0	0	0	0.07	0	0		0	0	0	0.5	0.41	0.12	0.09	0.1		0	0.05	0.19	0.05	0.37	0.4
WBGene00006373	ALG Class 26G	F55A11.2, syx-5		0	0	0.9	1.42	0.7	0	0	0.06	0	0.21	0		0	0	0.06	0	0	0		0	0	0	0.5	0.41	0	0.09	0.2		0.18	0.25	0.45	0.55	0.37	0.61
WBGene00006376	ALG Class 26G	C24G6.1, syp-2		0	0	0.13	0.14	0.23	0	0	0	0	0	0		0	0	0	0	0	0		0	0	0	0.25	0.1	0.24	0	0		0.18	0.15	0.06	0.05	0	0
WBGene00006409	ALG Class 26G	C09G9.4, hdl-2		0	0	0.83	3.06	2.67	0	0	0	0	0	0		0	0	0	0	0	0.07		0	0.18	0.13	1.5	1.02	0.06	0.09	0.5		1.59	1.74	1.93	1.75	1.57	1.21
WBGene00006433	ALG Class 26G	F42A8.2, sdhb-1		0	0	0.06	0.36	0.23	0	0	0	0	0	0		0	0	0	0	0	0		0	0	0	0	0	0	0	0.1		0.18	0	0.26	0.25	0	0.4
WBGene00006449	ALG Class 26G	alg-4, ZK757.3		0	0	1.7	2.46	3.13	0	0	0	0	0	0		0	0	0	0	0	0.03		0	0.09	0	0.75	1.12	0	0.18	0.2		0.88	1.21	2.02	1.6	1.39	1.42
WBGene00006509	ALG Class 26G	tag-164, Y76A2A.1		0	0	7.11	8.19	8.41	0.14	0	0	0	0	0		0.14	0	0	0.07	0.1	0.07		0.14	0.18	0	2.5	1.83	1.3	0.64	0.61		2.12	2.67	2.31	3.31	3.51	4.04
WBGene00006519	ALG Class 26G	cox-6A, F54D8.2		0	0	1.09	1.28	1.45	0	0	0.06	0	0	0		0	0	0.06	0	0.05	0		0.14	0	0	1.5	0.81	0.24	0.09	0.3		1.41	1.26	1.03	1.15	0.92	2.02
WBGene00006529	ALG Class 26G	C47B2.3, tba-2		0.07	0	4.99	2.78	4.26	0	0.18	0.06	0.17	0.21	0		0	0.18	0.06	0.21	0.1	0.48		0	0.18	0	2.5	3.31	0.59	0.14	0.71		2.03	2.16	2.5	3.21	1.11	2.93
WBGene00006536	ALG Class 26G	K01G5.7, tbb-1		0.07	0.06	0.64	0.71	1.57	0	0.06	0	0	0	0.15		0	0.06	0	0	0	0		0	0.09	0	0.75	0.31	0.12	0.18	0.1		1.06	0.65	0.58	0.35	0.92	1.01
WBGene00006537	ALG Class 26G	C36E8.5, tbb-2		0	0	3.78	4.98	5.25	0	0	0.06	0.17	0.53	0.15		0	0	0.06	0	0.1	0.07		0.28	0	0.13	1.5	0.61	0.24	0.09	0.3		1.59	0.72	0.77	1.45	1.11	0.61
WBGene00006590	ALG Class 26G	toc-1, ZC395.3		0	0	0.51	0.85	0.87	0	0	0	0	0	0		0	0	0	0	0	0		0	0.09	0.13	0.5	0.1	0	0	0.1		0	0.25	0.45	0.25	0	0.2
WBGene00006594	ALG Class 26G	M01A10.2, tom-1		0	0	0.06	0.28	0.29	0	0	0	0	0	0		0	0	0	0	0	0.07		0	0	0	0	0.1	0	0	0.1		0.18	0.3	0.13	0.2	0.18	0
WBGene00006624	ALG Class 26G	F48A9.3, try-6		0	0	1.09	0.96	1.94	0	0	0	0	0.11	0		0	0	0	0	0	0		0.14	0.09	0	0.25	0.15	0.12	0	0.05		1.24	0.2	0.16	0.23	0.55	0.4
WBGene00006625	ALG Class 26G	try-7, ZC581.6		0	0	0.13	0.28	0.23	0	0	0	0	0	0		0	0	0	0	0	0.07		0	0	0	0	0.1	0	0	0.1		0	0.35	0.26	0.2	0	0.81
WBGene00006626	ALG Class 26G	F10G7.2, tsn-1		0	0	0.51	1.35	0.46	0	0	0	0	0	0		0	0	0	0	0	0		0	0	0	0	0.1	0	0	0.2		0	0.15	0.26	0.2	0.37	0.4
WBGene00006644	ALG Class 26G	F59G1.2, tsp-18		0	0	2.18	2.56	1.8	0	0	0	0	0	0		0	0	0	0	0.05	0		0	0.09	0	1	1.02	0.24	0.09	0.1		0.53	0.86	0.77	0.55	0.18	0.61
WBGene00006661	ALG Class 26G	F17C8.5, twk-6		0	0	3.1	5.34	4.38	0.07	0	0	0	0	0		0.07	0	0	0	0.02	0.07		0.28	0.09	0.5	3.63	4.07	0.59	0.92	0.56		2.74	3.04	2.95	4.41	2.4	3.54
WBGene00006699	ALG Class 26G	C47E12.5, uba-1		0	0	0.19	0.36	0.81	0	0	0	0	0	0		0	0	0	0	0	0.07		0	0	0	0.25	0.2	0	0.09	0		0.35	0.1	0.39	0.25	0.74	0
WBGene00006713	ALG Class 26G	R01H2.6, ubc-18		0.07	0	0.06	0.5	0.93	0	0	0	0	0	0		0	0	0	0	0	0		0	0	0	0.75	0.41	0.12	0.18	0.1		0.53	0.65	0.32	0.7	0.92	1.42
WBGene00006715	ALG Class 26G	F40G9.3, ubc-20		0	0	0.13	0.28	0.29	0	0	0	0	0	0		0	0	0	0	0	0.14		0	0	0	0.25	0.31	0.12	0	0.2		0.53	0.25	0.19	0.35	0	0.61
WBGene00006719	ALG Class 26G	F49E12.4, ubc-24		0	0	2.82	5.34	5.28	0.07	0.12	0	0	0	0		0.07	0.12	0	0	0.14	0.21		0	0.09	0.25	3.5	3.67	0.24	0.46	1.01		4.42	3.32	3.27	4.66	6.1	5.26
WBGene00006720	ALG Class 26G	F25H2.8, ubc-25		0	0	0.26	0.28	0.29	0	0	0	0	0	0		0	0	0	0	0	0		0	0	0	0.25	0.1	0	0	0		0.35	0.3	0.19	0.25	0	0.2
WBGene00006727	ALG Class 26G	F25B5.4, ubq-1		0.07	0	0.67	1.07	0.87	0	0	0	0	0.42	0		0	0	0	0.07	0	0.07		0	0.09	0.13	0.5	1.43	0.12	0.18	0.3		2.48	1.86	2.25	2.81	2.4	2.83
WBGene00006728	ALG Class 26G	ubq-2, ZK1010.1		0	0	0.03	0.71	1.16	0	0.12	0	0	0	0		0	0.12	0	0	0	0.14		0	0	0	0.5	0.31	0.35	0.18	0.1		0.35	0.25	0.19	0.5	0.37	0.2
WBGene00006733	ALG Class 26G	F19B6.2, ufd-1		0.07	0	0.45	0.71	0.58	0	0.06	0.06	0	0	0		0	0.06	0.06	0	0.05	0		0.14	0	0	1	0.51	0	0.18	0.2		0.35	0.45	0.64	0.5	0.55	0.81
WBGene00006734	ALG Class 26G	T05H10.5, ufd-2		0	0	0.06	0.07	0.06	0	0	0	0	0.11	0		0	0	0	0.07	0	0		0.28	0.09	0.13	0	0	0	0	0.3		0.18	0.3	0	0.35	0.18	0.2
WBGene00006768	ALG Class 26G	unc-32, ZK637.8		0	0	0.77	0.85	2.15	0	0	0	0	0	0		0	0	0	0	0	0		0.28	0.09	0.13	2.25	0.31	0.35	0.18	0		0.88	0.75	0.71	0.5	1.11	1.42
WBGene00006785	ALG Class 26G	T07A5.2, unc-50		0	0	0.13	0.14	0.17	0	0	0	0	0	0		0	0	0	0	0	0		0	0	0	0.25	0.2	0.12	0	0		0	0.05	0.06	0.05	0	0.2
WBGene00006789	ALG Class 26G	F11C3.3, unc-54		0	0	0	0	0	0	0	0	0	0.11	0		0	0	0	0	0	0		0	0	0	0	0	0	0	0		0.18	0	0	0	0	0
WBGene00006794	ALG Class 26G	C38C3.5, unc-60		0	0	0	0.43	0	0	0	0	0	0	0		0	0	0	0	0	0		0	0	0	0	0.2	0	0	0		0.88	0.55	0.45	0.7	0.18	0.4
WBGene00006833	ALG Class 26G	F53F10.4, unc-108		0	0	0	0.36	0.23	0	0	0	0	0	0		0	0	0	0	0	0		0	0	0	0	0	0	0.09	0		0.18	0	0.26	0.25	0.74	0
WBGene00006888	ALG Class 26G	vbh-1, Y54E10A.9		0	0	0.19	1.92	1.04	0	0	0	0	0	0		0	0	0	0	0	0		0	0	0	0.88	0.15	0.12	0	0		0.27	0.18	0.13	0.25	0.55	0.61
WBGene00006910	ALG Class 26G	R10E11.8, vha-1		0	0	0	0	0	0	0	0	0	0	0		0	0	0	0	0	0		0	0	0	0	0	0	0	0		0	0	0.06	0	0	0
WBGene00006911	ALG Class 26G	R10E11.2, vha-2		0	0	2.69	3.49	3.42	0	0.06	0	0	0.11	0		0	0.06	0	0	0.05	0		0	0	0.25	1.5	0.51	0.24	0.28	0.4		0.88	0.81	0.51	0.85	0.37	0.81
WBGene00006917	ALG Class 26G	C17H12.14, vha-8		0	0	0.32	0	0.75	0	0	0	0	0	0		0	0	0	0	0	0.07		0	0	0	0.25	0.41	0	0	0		0.71	0.3	0.13	0.4	0.74	1.01
WBGene00006918	ALG Class 26G	vha-9, ZK970.4		0	0	0.13	0.64	0.46	0	0	0	0	0	0		0	0	0	0	0	0		0	0	0	0	0.2	0	0.09	0		0	0.05	0.19	0.15	0.55	0
WBGene00006924	ALG Class 26G	F56D12.5, vig-1		0	0	1.98	3.13	2.73	0	0	0	0	0	0		0	0	0	0	0	0		0.14	0.18	0	0.25	0.61	0	0	0		0.35	0.1	0.32	0.15	0.55	0
WBGene00006940	ALG Class 26G	wee-1.3, Y53C12A.1		0	0	0	0.14	0.75	0	0	0.06	0	0	0		0	0	0.06	0	0	0		0.14	0	0	0.5	0.71	0	0	0.2		0.88	1.21	0.96	1.4	1.48	0.61
WBGene00007080	ALG Class 26G	AH6.2, sfxn-1.1		0	0	1.79	2.85	2.73	0	0	0	0	0	0		0	0	0	0.07	0.05	0.07		0.14	0.09	0.13	1.75	1.63	0.12	0.18	0.4		2.3	3.47	3.21	4.46	3.33	4.04
WBGene00007081	ALG Class 26G	AH6.3		0	0	6.98	10.33	8.64	0	0.06	0	0	0.32	0		0	0.06	0	0	0.19	0.14		0	0.36	0.5	5.5	7.33	2.36	1.47	1.72		7.96	6.14	6.87	8.42	9.06	7.89
WBGene00007082	ALG Class 26G	acs-10, AH10.1		0	0	2.5	3.77	3.77	0	0.06	0.06	0	0.21	0		0	0.06	0.06	0	0	0.07		0.28	0.18	0.13	1.5	1.53	0.59	0.37	0.1		1.41	1.41	1.22	1.7	1.11	0.61
WBGene00007117	ALG Class 26G	B0240.2, spe-42		0	0	0.19	0.78	0.7	0	0	0	0	0	0		0	0	0	0	0	0		0	0.18	0	0.25	0.31	0	0.09	0		0	0.25	0	0.35	0	0.2
WBGene00007156	ALG Class 26G	B0379.2		0	0	1.47	2.6	2.55	0	0	0	0	0	0		0	0	0	0	0	0		0	0	0	0.13	0.71	0.12	0.05	0.4		1.41	1.08	0.51	0.85	1.66	1.11
WBGene00007159	ALG Class 26G	B0379.7		0	0	1.76	2.49	2.55	0	0	0.06	0	0	0		0	0	0.06	0	0	0.07		0.14	0.13	0.25	1.25	0.92	0.71	0.51	0.1		2.21	1.31	1.25	1.88	2.49	1.42
WBGene00007169	ALG Class 26G	B0393.4		0	0	4.1	8.55	9.22	0	0	0	0	0	0		0	0	0	0	0.05	0		0	0	0.13	1	1.32	0.12	0.37	0		0.18	0.5	0.64	0.6	0.37	0
WBGene00007190	ALG Class 26G	B0491.3, rmd-3		0	0	1.43	2.56	1.14	0	0	0	0	0	0		0	0	0	0	0.02	0		0.05	0.09	0	0.58	0.71	0.04	0.03	0.03		0.24	0.25	0.3	0.7	0.68	1.01
WBGene00007209	ALG Class 26G	BE10.1		0	0	1.47	4.34	3.07	0.07	0.12	0	0	0	0		0.07	0.12	0	0	0.1	0		0	0	0	0.75	1.43	0.12	0	0.2		0.71	0.91	1.09	0.7	1.11	0.2
WBGene00007222	ALG Class 26G	C01F6.2		0	0	0.7	1.28	0.99	0	0	0	0	0	0		0	0	0	0	0	0		0.28	0	0	0.75	0.71	0.12	0.28	0.1		0.88	0.7	1.09	1.05	0.74	1.01
WBGene00007223	ALG Class 26G	C01F6.9		0	0	0.13	0.14	0.35	0	0	0	0	0	0		0	0	0	0	0	0.14		0	0	0	0	0.31	0.24	0.18	0.1		0.88	0.25	0.26	0.3	0.18	0.4
WBGene00007230	ALG Class 26G	C01G10.1		0	0	0.83	1.42	1.28	0	0	0	0	0	0		0	0	0	0	0	0		0.14	0.09	0	1.5	1.83	1.18	1.19	1.21		3.01	2.97	2.31	2.66	3.33	3.24
WBGene00007239	ALG Class 26G	C01G10.14		0	0	6.59	9.78	9.8	0.18	0.15	0.09	0.09	0.26	0.07		0.18	0.15	0.09	0.11	0.21	0.41		0.14	0.22	0.38	4.63	5.65	1.06	1.33	1.62		3.63	3.67	4.11	5.24	4.25	4.85
WBGene00007244	ALG Class 26G	C01G12.3		0	0	0.19	1.28	1.39	0.07	0	0.12	0	0	0		0.07	0	0.12	0	0	0.07		0.14	0	0	0.25	0.2	0	0.28	0.1		1.24	0.55	0.39	0.9	0.92	1.82
WBGene00007248	ALG Class 26G	C01G12.8, catp-4		0	0	1.22	1.42	2.32	0.07	0	0	0	0	0		0.07	0	0	0	0.05	0.28		0.14	0.09	0	0.75	1.63	0.12	0	0.1		1.24	1.21	0.96	2.05	2.03	1.82
WBGene00007249	ALG Class 26G	C01G12.9		0	0	1.66	2.07	3.31	0	0	0	0	0	0		0	0	0	0	0.05	0		0	0	0	1.75	1.63	0.47	0.28	0.4		3.36	4.28	4.17	3.91	3.51	4.45
WBGene00007255	ALG Class 26G	C01H6.6, cnnm-4		0	0	1.34	3.13	3.02	0	0.06	0	0	0	0		0	0.06	0	0	0	0		0	0.09	0.13	0.26	0.41	0	0.09	0.1		0.71	0.7	0.51	0.55	0.55	0.81
WBGene00007269	ALG Class 26G	C03C10.2		0	0	2.18	1.85	1.68	0	0	0.06	0	0	0		0	0	0.06	0	0	0		0	0	0.13	0.25	0.92	0.12	0	0.2		0.18	0.3	0.39	0.45	0.55	0.81
WBGene00007270	ALG Class 26G	C03C10.4, rei-1		0	0	1.02	0.93	1.74	0	0	0	0	0	0		0	0	0	0	0	0		0	0	0	0.75	1.02	0.47	0.18	0.3		1.24	0.3	0.83	1	0.37	0.4
WBGene00007274	ALG Class 26G	C03C11.1		0	0	2.43	3.32	3.29	0	0.03	0	0	0.05	0		0	0.03	0	0	0.05	0.21		0	0.31	0.06	2.75	2.29	0.35	0.37	0.4		2.3	2.82	2.37	3.83	3.97	3.4
WBGene00007305	ALG Class 26G	C04G2.2, ttbk-5		0	0	2.62	4.77	5.51	0.07	0	0.12	0	0	0		0.07	0	0.12	0	0.14	0.28		0	0.09	0.25	1.25	0.92	0.47	0.46	0.2		1.06	0.91	1.16	1.35	1.66	0.81
WBGene00007306	ALG Class 26G	C04G2.5		0	0	6.08	6.41	6.03	0.07	0.06	0.06	0	0	0		0.07	0.06	0.06	0	0	0.48		0	0.27	0	3.25	2.44	0.83	0.64	0.71		1.77	1.91	2.05	1.85	1.66	2.02
WBGene00007307	ALG Class 26G	C04G2.8, spch-1		0	0.06	37.37	54.05	66.62	2.02	1.4	0.75	0.7	1.16	0		2.02	1.4	0.75	0.96	2.62	4.8		3.31	4.29	2.65	39.68	38.87	10.36	9.53	9.22		32.19	27.46	31.97	36.23	34.25	31.41
WBGene00007308	ALG Class 26G	C04G2.9		0	0	1.44	3.7	2.58	0	0	0.06	0	0.11	0		0	0	0.06	0.07	0.1	0.14		0	0.18	0.25	0.63	0.66	0.47	0.32	0.5		0.88	1.31	1.16	0.88	0.65	1.31
WBGene00007309	ALG Class 26G	C04G2.10		0	0	0.32	0.43	0	0	0	0	1.22	0.11	0.29		0	0	0	0	0	0		0.41	0	0	0	0.2	0.24	0.18	0.3		0.35	0.5	0.32	0.5	0.55	0.2
WBGene00007335	ALG Class 26G	C05C12.1		0	0	3.65	5.41	5.69	0.14	0	0	0	0	0		0.14	0	0	0.07	0.14	0		0.28	0.13	0.13	2.5	1.99	0.71	0.37	0.76		2.3	2.31	2.37	2.68	2.22	1.62
WBGene00007337	ALG Class 26G	C05C12.5		0	0	11.14	14.1	14.04	0.14	0.06	0.06	0	0.63	0		0.14	0.06	0.06	0.21	0.19	0.76		0.83	0.44	0.63	13	10.69	1.65	1.65	2.22		10.79	9.31	8.47	13.43	10.35	8.49
WBGene00007352	ALG Class 26G	C06A1.1, cdc-48.1		0	0.06	0.77	1.71	1.16	0.07	0	0.06	0	0	0.15		0.07	0	0.06	0.07	0	0		0.28	0.36	0.13	1	1.63	0.24	0.74	0.3		2.12	2.11	1.93	3.01	1.85	1.01
WBGene00007354	ALG Class 26G	C06A1.3		0	0	3.81	7.23	5.66	0	0.06	0	0	0.11	0.15		0	0.06	0	0.14	0	0.07		0	0	0.13	1.75	1.83	1.18	0.18	0.5		2.39	2.92	3.53	4.08	4.71	5.56
WBGene00007363	ALG Class 26G	C06B3.4, stdh-1		0	0	0.32	0.43	0.29	0	0	0	0	0	0		0	0	0	0	0	0		0	0	0	0.75	0.1	0.12	0.09	0.1		0.35	0.25	0.35	0.23	0	0.61
WBGene00007381	ALG Class 26G	C06C6.7		0	0	0.63	0.75	0.97	0	0	0	0	0.14	0		0	0	0	0	0.03	0		0	0.09	0	0.25	0.81	0.12	0	0.1		0.83	0.58	0.68	1.09	1.11	0.91
WBGene00007382	ALG Class 26G	C06C6.8		0	0	0	0.25	0.46	0	0	0	0	0	0		0	0	0	0	0	0		0	0	0	0.13	0.41	0	0.09	0.2		0.97	0.81	0.87	0.45	0.65	1.21
WBGene00007383	ALG Class 26G	C06C6.9		0	0	0.13	0.11	0.12	0	0	0	0	0	0		0	0	0	0	0	0		0	0	0	0.13	0.2	0	0	0.1		0.09	0.25	0.22	0.25	0.09	0
WBGene00007415	ALG Class 26G	C07E3.4		0	0	1.25	2.53	1.73	0	0	0	0	0	0		0	0	0	0	0.02	0.09		0	0.03	0	0.08	0.29	0.22	0.11	0.05		0.29	0.14	0.28	0.32	0.37	0.24
WBGene00007446	ALG Class 26G	C08F8.4, mboa-4		0	0	8.51	13.46	12.07	0.14	0.06	0.12	0	0	0		0.14	0.06	0.12	0	0.38	0.07		0.41	0.09	0.13	2.75	4.89	1.06	1.01	1.11		1.77	2.82	3.27	3.91	4.07	3.84
WBGene00007448	ALG Class 26G	C08F8.6		0	0	1.92	1.92	2.38	0	0	0	0	0.11	0		0	0	0	0	0	0.14		0	0	0.13	1	0.71	0.24	0.18	0.2		0.35	0.75	0.32	0.75	0.92	1.01
WBGene00007478	ALG Class 26G	C09F9.1		0	0	0.64	1.14	1.04	0	0	0	0	0	0		0	0	0	0	0	0		0	0.09	0	0.25	0.61	0	0	0		0.53	0.55	0.58	0.85	1.29	0.4
WBGene00007489	ALG Class 26G	C09G5.7		0	0	4.48	4.56	6.03	0.07	0	0	0	0.42	0		0.07	0	0	0	0.05	0.07		0.14	0.27	0	1.25	0.92	0.35	0.55	0		0	0.35	0.51	0.7	0.37	0.61
WBGene00007512	ALG Class 26G	C10C6.3		0	0	2.24	4.34	7.25	0	0	0.06	0	0.11	0		0	0	0.06	0	0.05	0.14		0.55	0.09	0	2.5	1.43	0.24	0.46	0.61		1.95	3.17	2.57	3.86	3.7	3.44
WBGene00007538	ALG Class 26G	C12D8.9		0	0	0.96	1.92	2.03	0	0	0	0	0	0		0	0	0	0	0.05	0.07		0	0	0	1.75	1.32	0.24	0.64	0.4		1.06	0.6	0.71	0.65	0.74	0.81
WBGene00007554	ALG Class 26G	C13G3.3, pptr-2		0.07	0	0.19	0.64	0.52	0	0	0	0	0	0		0	0	0	0	0	0		0	0.09	0.25	0.5	0.81	0	0	0.1		0.53	0.45	0.13	0.6	0.55	0.4
WBGene00007561	ALG Class 26G	C14A4.11, ccm-3		0	0	0.19	0.07	0.46	0	0	0	0	0	0		0	0	0	0	0	0		0	0	0	0	0.2	0	0.09	0.3		0.18	0.4	0.26	0.75	0.74	0.61
WBGene00007563	ALG Class 26G	C14A4.13		0	0	8.32	10.9	12.82	0.14	0	0	0	0	0		0.14	0	0	0.07	0.14	0.28		0.69	0.36	0.25	5.5	3.97	0.95	0.83	0.5		4.95	3.88	4.49	5.01	6.28	4.85
WBGene00007570	ALG Class 26G	C14A6.6		0	0	0.11	0.21	0.23	0	0.06	0	0	0	0		0	0.06	0	0	0	0.07		0	0	0	0.25	0	0	0	0.2		0	0	0.13	0.1	0.18	0
WBGene00007597	ALG Class 26G	C15A11.2		0	0	4.74	5.2	4.99	0	0	0.06	0	0	0		0	0	0.06	0.07	0.1	0.07		0.28	0.18	0	2.25	1.53	0.59	0.46	0.61		2.48	3.07	2.82	3.76	2.59	3.64
WBGene00007610	ALG Class 26G	C15H7.3		0	0	10.69	14.1	11.6	0	0.12	0.12	0	0	0.15		0	0.12	0.12	0.07	0.12	0.17		0.34	0.58	0.5	2	3.56	0.47	0.64	0.61		4.86	2.79	1.96	3.31	1.94	2.83
WBGene00007611	ALG Class 26G	C15H7.4		0	0	1.98	1.28	1.97	0	0	0	0	0.11	0		0	0	0	0	0	0		0	0	0	0.5	0.1	0	0	0.1		0.35	0.25	0.32	0.4	0.55	0.61
WBGene00007624	ALG Class 26G	C16C10.3, hrde-1		0.14	0.13	0.7	1	0.87	0.07	0	0	0.52	1.27	0.44		0.07	0	0	0.07	0.05	0		0.55	0.09	0.13	0.25	0.61	0	0.18	0		0.18	0.7	0.64	0.75	0.55	0.61
WBGene00007633	ALG Class 26G	C16D2.1		0	0	2.43	3.13	2.55	0.07	0	0	0	0	0		0.07	0	0	0	0	0.07		0	0.18	0	0.75	0.81	0.71	0.28	0.4		0.88	1.01	1.22	1.7	1.29	1.42
WBGene00007639	ALG Class 26G	C17D12.5		0	0	9.03	10.61	11.95	0	0	0.06	0.17	0.11	0		0	0	0.06	0.14	0.1	0.07		0.14	0.27	0.38	1.75	2.85	0	0.74	0.61		0.71	1.46	1.35	1.1	0.74	0.81
WBGene00007641	ALG Class 26G	C17E4.1		0	0	1.34	1.57	1.22	0	0	0	0	0	0		0	0	0	0.07	0.1	0		0	0	0	0	0.41	0.24	0	0		0.88	0.3	0.19	0.3	0.18	0.2
WBGene00007683	ALG Class 26G	C18E9.2		0	0	0.7	0.71	0.93	0.07	0	0	0	0	0		0.07	0	0	0	0	0		0	0.09	0	0	0.1	0	0	0		0	0.2	0.13	0.15	0.18	0.2
WBGene00007684	ALG Class 26G	C18E9.4		0	0	0.32	0.5	0.58	0	0	0	0	0	0		0	0	0	0	0	0		0	0	0	0	0.1	0	0	0		0.35	0.05	0	0.1	0.18	0
WBGene00007688	ALG Class 26G	C18E9.8		0	0	2.69	5.41	4.82	0	0	0	0	0.21	0		0	0	0	0	0	0		0	0.09	0	0.75	1.02	0.24	0.09	0.1		0.53	0.65	0.39	0.8	0.92	0.4
WBGene00007696	ALG Class 26G	C24F3.1, tram-1		0	0	0.51	1.99	2.15	0	0	0	0	0	0		0	0	0	0	0	0		0.14	0	0	0.25	0.31	0.35	0.09	0.1		0.35	0.86	0.83	0.9	0.74	1.01
WBGene00007699	ALG Class 26G	C24H11.1		0	0	2.37	3.04	2.21	0	0	0	0	0.05	0		0	0	0	0.07	0.05	0.1		0	0	0.06	1.63	1.88	0	0.51	0.4		1.41	1.28	0.58	1.1	1.02	0.67
WBGene00007700	ALG Class 26G	C24H11.2		0	0	2.24	4.46	2.79	0	0	0	0	0.05	0		0	0	0	0	0.05	0.07		0.14	0.27	0	1.5	1.63	0.12	0.51	0.66		1.68	1.13	1.03	1.53	1.48	1.58
WBGene00007714	ALG Class 26G	C25D7.1		0	0	7.94	8.85	10.1	0.18	0.15	0.09	0.09	0.26	0.07		0.18	0.15	0.09	0.11	0.26	0.62		0.14	0.31	0.38	5.38	5.35	0.71	1.52	1.31		3.63	3.77	4.24	4.84	4.99	4.45
WBGene00007721	ALG Class 26G	C25D7.12		0	0	0	0.14	0.06	0	0	0	0	0	0		0	0	0	0	0	0		0	0	0	0	0.05	0	0	0.03		0.06	0.01	0.03	0.08	0.09	0.18
WBGene00007732	ALG Class 26G	C25G4.4, spe-44		0	0	1.79	1.64	1.33	0	0	0	0	0	0		0	0	0	0	0	0		0.14	0.09	0	0	0.2	0	0	0		0.88	0.3	0.26	0.25	0	0.4
WBGene00007733	ALG Class 26G	C25G4.6, smz-1		0	0	17.67	23.86	27.96	1.2	0.47	0.52	0	0.42	0		1.2	0.47	0.52	0.63	0.62	1.93		0.83	0.98	1.39	12.5	15.68	3.07	3.31	3.13		8.49	7.55	7.06	9.07	6.65	8.9
WBGene00007735	ALG Class 26G	C25G4.8		0	0	2.24	2.14	1.91	0	0.12	0	0	0	0		0	0.12	0	0	0.05	0.07		0	0	0	2.25	1.12	0.12	0.46	0.4		0.71	1.46	1.6	1.5	2.59	2.22
WBGene00007740	ALG Class 26G	C26C6.6		0	0	2.11	4.56	5.05	0	0	0	0	0	0.15		0	0	0	0	0.05	0.14		0.14	0.27	0.25	3.75	3.06	1.3	0.37	0.91		2.48	2.42	1.41	3.01	3.51	3.44
WBGene00007763	ALG Class 26G	C27B7.6		0	0	2.24	3.35	2.38	0	0	0	0	0	0		0	0	0	0	0.1	0		0.14	0.18	0.13	1.75	2.34	0.47	0.83	0.81		3.18	3.47	3.27	5.01	4.25	4.04
WBGene00007777	ALG Class 26G	C27D8.1		0	0	9.79	10.9	11.72	0.21	0.18	0.12	0	0	0		0.21	0.18	0.12	0.14	0.14	0.48		0.83	0.62	0	7.75	4.99	1.06	1.65	1.11		6.01	5.44	6.03	7.77	7.76	7.28
WBGene00007778	ALG Class 26G	C27D8.2		0	0	1.54	2.07	3.48	0	0	0	0	0.21	0		0	0	0	0.07	0.14	0		0.14	0.09	0	0.5	1.12	0.24	0.18	0.1		1.59	0.96	1.28	0.95	0.92	2.22
WBGene00007791	ALG Class 26G	C28A5.6		0	0	0.7	1.89	0.44	0	0	0	0	0	0		0	0	0	0	0	0		0.41	0	0	0.5	0.21	0.06	0.28	0		0.01	0.43	0.06	0.38	0	0.2
WBGene00007863	ALG Class 26G	C32C4.3		0	0	1.66	3.63	3.42	0	0	0	0	0.11	0		0	0	0	0	0.05	0.07		0	0	0	1.5	0.92	0.12	0.64	0.2		0.53	1.21	0.58	1.2	0.92	1.42
WBGene00007888	ALG Class 26G	C33A12.15, ttr-9		0	0	1.15	2.49	2.84	0	0.06	0	0	0	0		0	0.06	0	0	0.05	0		0.14	0.09	0	1.75	1.73	0.35	0.09	0.3		1.24	1.56	1.22	2.1	2.22	1.21
WBGene00007923	ALG Class 26G	C34C12.4		0	0	0.64	1.14	1.39	0	0	0	0	0	0		0	0	0	0	0.05	0		0	0.09	0	1.5	1.12	0.12	0.09	0.2		0.88	1.91	1.28	2.31	2.03	1.42
WBGene00007969	ALG Class 26G	acs-19, C36A4.9		0	0	0.51	0.71	0.35	0	0	0	0	0	0		0	0	0	0	0	0		0	0	0	0.5	0.51	0	0.37	0		0.53	0.25	0.06	0.3	0.18	0.2
WBGene00007977	ALG Class 26G	C36B1.10, gska-3		0	0	3.01	5.13	6.21	0.07	0.12	0.12	0	0	0		0.07	0.12	0.12	0	0.19	0.55		0.97	0.71	0.38	4.25	6.11	0.83	2.21	1.92		5.84	6.09	6.29	7.67	6.47	9.1
WBGene00007986	ALG Class 26G	C36F7.5		0	0	1.2	1.92	1.44	0.09	0.12	0	0	0	0		0.09	0.12	0	0	0	0.07		0	0	0	0.92	0.88	0.16	0.55	0.33		0.52	1.37	1.22	1.47	1.66	0.94
WBGene00007987	ALG Class 26G	C36H8.1		0	0	4.61	8.62	9.8	0.07	0	0.12	0	0.32	0		0.07	0	0.12	0.14	0.24	0.28		0.41	0.36	0	6	4.79	1.42	1.1	1.41		5.31	4.08	3.85	4.61	4.62	5.06
WBGene00008001	ALG Class 26G	C38C10.3		0	0	12.45	21.26	20.6	0.18	0.12	0.06	0	0	0		0.18	0.12	0.06	0.21	0.14	1.34		0.62	0.84	0.69	16.88	13.14	3.6	3.31	3.18		18.57	17.94	17.72	25.16	18.94	19.11
WBGene00008019	ALG Class 26G	C38H2.2		0	0	0.32	0.85	0.93	0	0	0	0	0	0		0	0	0	0	0	0		0	0	0	0.25	0.2	0	0.09	0		0.35	0.2	0.06	0.6	0.18	1.01
WBGene00008063	ALG Class 26G	C41G7.6, cylc-2		0	0	3.33	3.67	3.16	0	0.12	0	0	0	0		0	0.12	0	0	0.05	0.31		0	0	0	1	1.12	0.3	0.28	0		1.06	1.11	0.9	1.13	1.02	0.81
WBGene00008074	ALG Class 26G	C43F9.6, nkb-2		0	0	0.45	1.5	1.22	0	0	0	0	0	0		0	0	0	0	0.05	0		0	0	0	0	0.2	0.12	0.09	0		0.18	0.35	0.26	0.6	0.74	0.4
WBGene00008124	ALG Class 26G	C47A4.3		0	0	0.67	1.25	1.25	0	0	0	0	0	0		0	0	0	0	0	0.07		0.14	0.09	0	1.38	0.87	0.24	0.09	0		1.15	0.93	0.83	1.23	0.83	2.02
WBGene00008125	ALG Class 26G	C47A4.5		0	0	9.46	13.51	11.62	0.11	0.09	0.09	0.09	0.26	0		0.11	0.09	0.09	0.04	0.1	0.07		0.07	0.27	0.19	6.25	4.81	1.48	0.69	0.76		3.18	2.97	2.47	3.46	2.49	2.53
WBGene00008136	ALG Class 26G	C47D12.2		0	0	0	0	0.12	0	0	0	0	0	0		0	0	0	0	0	0.07		0.14	0	0	0	0	0	0	0		0	0	0.06	0.1	0	0
WBGene00008137	ALG Class 26G	C47D12.3, sfxn-1.4		0	0	3.01	5.77	6.79	0	0	0	0	0.11	0		0	0	0	0	0.1	0.07		0	0.09	0	1.75	2.04	0.47	0.18	0.61		2.3	2.31	2.5	3.26	1.66	1.82
WBGene00008141	ALG Class 26G	C47E8.1		0	0	4.03	5.84	4.47	0.07	0.06	0	0	0	0		0.07	0.06	0	0	0	0.14		0	0.09	0	2.25	1.94	0.35	0.37	0.4		1.77	1.71	1.28	2.21	2.22	1.62
WBGene00008149	ALG Class 26G	C47E12.4, pyp-1		0	0	0.19	0.43	0.46	0	0	0	0	0	0		0	0	0	0	0	0		0	0	0	0	0	0	0.09	0.1		0	0	0.06	0	0	0
WBGene00008153	ALG Class 26G	C47E12.10		0	0	1.54	0.78	0.87	0	0	0	0	0.11	0		0	0	0	0	0	0.07		0	0	0.13	0.25	0.2	0	0	0.1		0	0.3	0.26	0.5	0.37	0.2
WBGene00008155	ALG Class 26G	C47E12.12		0	0	0.19	0.64	0.7	0	0	0	0	0	0		0	0	0	0	0	0		0	0	0	0	0.1	0	0	0		0.88	0.15	0.13	0.2	0.18	0.2
WBGene00008185	ALG Class 26G	best-10, C49A1.2		0	0	0.9	1.42	0.29	0	0	0	0	0	0		0	0	0	0	0	0		0	0	0	0.25	0.1	0	0	0.1		0	0.1	0	0.25	0	0
WBGene00008186	ALG Class 26G	best-11, C49A1.3		0	0	1.28	1.21	1.33	0	0	0	0	0	0		0	0	0	0	0	0		0	0	0	0	0	0	0.18	0		0	0.1	0.06	0.15	0	0.2
WBGene00008230	ALG Class 26G	C50F4.2, pfk-1.2		0	0	4.8	4.63	5.05	0.14	0	0.06	0	0	0		0.14	0	0.06	0.07	0.05	0		0	0	0.13	2	0.61	0.71	0.37	0.71		1.06	1.46	1.93	1.95	1.66	1.21
WBGene00008235	ALG Class 26G	C50F4.10		0	0	0.64	1	0.96	0	0	0	0	0	0		0	0	0	0	0	0		0.07	0	0	0.38	0.71	0.18	0.18	0.1		0.71	0.7	0.67	0.83	0.18	0.61
WBGene00008255	ALG Class 26G	C51E3.10		0	0	11.84	12.53	14.91	0	0.06	0	0	0.32	0		0	0.06	0	0	0.05	0.07		0.41	0.44	0	4.5	6.62	1.18	1.29	1.11		2.83	2.52	2.63	3.61	2.03	2.43
WBGene00008259	ALG Class 26G	C52E4.7		0	0	1.79	2.14	3.25	0	0	0	0	0	0		0	0	0	0.07	0.05	0.14		0	0	0.13	1.75	1.83	0.24	0.09	0.5		0.88	1.01	1.22	1.2	0.92	1.42
WBGene00008272	ALG Class 26G	C53B4.2		0	0	3.01	2.56	3.48	0	0	0.06	0	0	0		0	0	0.06	0	0	0.07		0	0	0.13	0.25	0.41	0.12	0.18	0.1		0.71	0.75	0.39	1	0.37	0.2
WBGene00008299	ALG Class 26G	C54D10.4		0	0	1.47	1.28	3.37	0	0	0	0	0.21	0		0	0	0	0	0.14	0.07		0	0	0	2.25	2.04	0	0.37	0.3		2.12	1.81	0.96	2.15	1.29	2.02
WBGene00008312	ALG Class 26G	C54G4.2		0	0	0.19	0.43	1.16	0	0	0	0	0.11	0		0	0	0	0	0	0		0	0.09	0.13	0.25	1.94	0.24	0.18	0.2		2.48	1.36	1.41	2.31	1.48	1.21
WBGene00008313	ALG Class 26G	C54G4.3		0	0	1.54	2.85	2.55	0	0	0	0	0	0		0	0	0	0	0	0.07		0	0	0	1	0.71	0.35	0.18	0.4		0.35	0.75	0.96	1.05	0.74	0.81
WBGene00008332	ALG Class 26G	C55A6.3		0	0	4.26	4.49	3.68	0.07	0	0	0	0	0		0.07	0	0	0.07	0.07	0		0	0	0	1.88	3.26	0.47	1.06	0.4		3.18	2.52	2.21	3.01	2.49	2.63
WBGene00008333	ALG Class 26G	C55A6.4		0	0	1.47	2.53	3.37	0	0	0	0	0	0		0	0	0	0	0	0		0.14	0.09	0	0.13	0.81	0	0	0.1		1.59	1.11	0.77	1.38	0.55	0.61
WBGene00008340	ALG Class 26G	C55A6.11		0	0	0.45	1	0.93	0	0	0	0	0	0		0	0	0	0	0	0.07		0	0	0	0.75	0.81	0.12	0	0.1		1.24	1.76	1.35	1.75	1.85	2.22
WBGene00008383	ALG Class 26G	D1081.5		0	0	4.1	10.11	10.97	0.07	0	0	0	0	0		0.07	0	0	0.14	0.1	0.62		0.28	0.36	0.38	8.75	12.12	2.84	1.65	3.53		6.19	6.54	6.48	8.67	7.02	7.08
WBGene00008385	ALG Class 26G	D1081.7		0	0.06	0.51	0.07	0.41	0	0	0	0	0	0		0	0	0	0	0	0		0.14	0.09	0	1	0.2	0	0	0.2		0.18	0.05	0.13	0.15	0	0.2
WBGene00008411	ALG Class 26G	D2030.1, mans-1		0	0	0	0.14	0.17	0	0	0	0	0	0		0	0	0	0	0	0		0	0	0	0	0	0	0	0		0	0	0.06	0	0	0
WBGene00008422	ALG Class 26G	D2045.2		0	0.06	0	0	0.06	0	0	0	0.44	0.11	0		0	0	0	0	0.02	0		0.41	0.27	0.13	0.25	0	0	0.18	0		0.18	0.2	0.29	0.05	0.37	0.4
WBGene00008480	ALG Class 26G	E04D5.1, eif-2A		0	0	0.19	0.93	0.7	0	0	0	0	0	0.29		0	0	0	0	0	0.07		0.14	0	0	0	0.31	0	0	0		0	0.05	0.06	0.25	0.18	0
WBGene00008498	ALG Class 26G	F01D5.8		0	0	0.77	1.78	1.45	0	0	0	0	0	0		0	0	0	0	0	0.07		0.14	0.09	0	0.75	0.61	0.47	0.18	0.1		1.06	1.16	0.71	1.45	1.29	0.81
WBGene00008508	ALG Class 26G	F01G10.5		0	0	1.09	3.06	3.42	0	0	0	0	0	0		0	0	0	0	0.1	0		0	0.27	0	1.25	1.22	0	0.09	0.1		1.77	1.16	1.54	2.15	2.22	2.02
WBGene00008514	ALG Class 26G	F02A9.4, mrpl-44		0	0	0.7	1.14	0.52	0	0	0	0	0	0		0	0	0	0	0	0		0	0	0.13	0	0.1	0	0	0		0.35	0.2	0.13	0.4	0	0.4
WBGene00008532	ALG Class 26G	dpt-1, F02E9.9		0	0	0	0.28	0.23	0	0	0	0.17	0	0		0	0	0	0	0	0		0	0	0	0	0.1	0	0	0		0	0.1	0	0.05	0	0.2
WBGene00008541	ALG Class 26G	F07A5.2		0	0	3.07	3.85	3.07	0.14	0.12	0.17	0	0.11	0		0.14	0.12	0.17	0.14	0	0.14		0.28	0.36	0.38	5.25	4.18	0.83	0.37	1.82		7.43	6.79	7.64	9.12	9.24	8.49
WBGene00008556	ALG Class 26G	F07D3.3		0	0	1.15	2.28	1.8	0	0	0	0	0	0		0	0	0	0	0	0		0	0	0	0.25	0.61	0.24	0.09	0.1		0.35	0.15	0.19	0.2	0.74	0.4
WBGene00008561	ALG Class 26G	F07H5.10		0	0	2.05	2.07	1.22	0	0	0	0	0	0		0	0	0	0	0	0.14		0.14	0	0.13	0.75	0.92	0.24	0.09	0.5		0.71	0.81	1.03	0.7	0.74	1.42
WBGene00008590	ALG Class 26G	F08H9.2		0	0	0.7	0.07	0.41	0.07	0	0.06	0	0.42	0		0.07	0	0.06	0	0	0.21		0.55	0.36	0.13	1.25	0.61	0.47	0.18	0.2		0.88	0.81	0.83	0.85	0.55	1.01
WBGene00008649	ALG Class 26G	F10D11.3		0	0	4.07	3.7	5.8	0.07	0.06	0	0	0	0		0.07	0.06	0	0.07	0.02	0.14		0	0.09	0	0.63	0.97	0.06	0.18	0.1		1.24	1.28	0.74	1.03	1.76	0.4
WBGene00008651	ALG Class 26G	F10D11.5		0	0	1.22	2.85	2.96	0	0	0	0	0	0		0	0	0	0	0	0		0	0.09	0.25	1	0.61	0	0	0.1		0.88	0.35	0.19	1.05	0.37	0.61
WBGene00008659	ALG Class 26G	clec-151, F10F2.7		0	0	0.8	1.25	0.95	0	0.03	0	0	0	0		0	0.03	0	0	0.05	0		0.07	0.09	0	0.13	0.61	0	0.05	0.24		0.35	0.4	0.32	0.48	0.46	0.51
WBGene00008660	ALG Class 26G	clec-153, F10F2.8		0	0	0.1	0.85	0.7	0	0.06	0	0	0	0		0	0.06	0	0	0	0		0	0	0	0.25	0.31	0	0	0		0.18	0.15	0.32	0.4	0.18	0.4
WBGene00008687	ALG Class 26G	F11A10.6		0.07	0	1.28	0.71	1.51	0.07	0	0	0	0	0		0.07	0	0	0	0	0		0	0	0	0	0.51	0	0	0.4		0.18	0.5	0.19	0.15	0.18	0.4
WBGene00008724	ALG Class 26G	F13A7.1		0	0	3.26	4.7	3.31	0.07	0	0.06	0	0	0		0.07	0	0.06	0.07	0.1	0.34		0	0.27	0	3.5	3.87	1.3	0.64	0.71		3.71	2.47	3.4	3.51	2.77	4.45
WBGene00008725	ALG Class 26G	F13A7.7		0	0	1.73	2.42	2.84	0.07	0	0	0	0.11	0		0.07	0	0	0	0	0.07		0	0	0	0.5	0.81	0.35	0.09	0.2		0.18	0.55	0.96	1.25	0.74	0.4
WBGene00008743	ALG Class 26G	F13D12.9		0	0	5.83	9.68	6.9	0	0	0	0	0	0		0	0	0	0	0	0.14		0.14	0	0	2.75	1.43	0.47	0.55	0.3		1.41	1.11	1.6	1.75	2.03	1.42
WBGene00008754	ALG Class 26G	F13E9.5		0	0	1.02	0.57	0.52	0	0	0	0	0	0		0	0	0	0	0	0.07		0	0	0	0.25	0.51	0	0.18	0.1		0.71	0.5	0.71	0.75	0.18	0
WBGene00008772	ALG Class 26G	F13G11.2, irld-4		0	0	0.48	0.46	1.36	0	0	0	0	0	0		0	0	0	0	0	0		0.14	0	0	0.13	0.36	0	0.09	0		0.35	0.48	0.39	0.58	0.28	0.1
WBGene00008780	ALG Class 26G	F14B4.2, hxk-1		0	0	0	0.28	0.17	0	0	0	0	0.11	0		0	0	0	0	0	0		0	0	0	0.25	0.2	0.12	0.09	0.1		0.18	0.25	0.19	0.35	0	0.2
WBGene00008800	ALG Class 26G	F14E5.2		0	0	0.26	0.5	0.41	0	0	0	0	0	0		0	0	0	0	0.05	0		0	0.09	0	0	0.2	0.24	0	0		0.18	0.15	0.06	0.2	0.18	0.4
WBGene00008811	ALG Class 26G	F14F7.4		0	0	8.96	9.83	10.73	0.07	0	0	0	0.11	0.15		0.07	0	0	0	0.05	0.14		0.14	0	0.13	2.5	2.44	0.59	0.55	0		4.42	4.53	4.94	6.57	5.73	6.87
WBGene00008832	ALG Class 26G	F14H8.1, obr-2		0	0	0.7	0.64	1.33	0	0	0	0	0	0		0	0	0	0.07	0.1	0.28		0	0.18	0	1.25	1.63	0.47	0.18	0.2		1.95	2.06	2.05	1.9	2.03	2.22
WBGene00008852	ALG Class 26G	F15C11.2, ubql-1		0	0	0.13	0.78	0.58	0	0	0	0	0	0		0	0	0	0	0	0		0	0.09	0	0.25	0.41	0	0	0.1		0	0.45	0.13	0.2	0	0
WBGene00008854	ALG Class 26G	F15D3.4		0	0	1.47	1.07	1.28	0.07	0	0	0	0	0		0.07	0	0	0	0	0		0	0	0	0	0	0	0	0		0	0.15	0.06	0.25	0.18	0.4
WBGene00008871	ALG Class 26G	F15H10.4, tag-314		0	0	0.9	0.78	1.28	0	0	0	0	0	0		0	0	0	0	0	0		0	0	0	0.25	0.51	0	0	0.1		0.53	0.65	0.19	0.5	0.18	0.61
WBGene00008874	ALG Class 26G	F15H10.7		0	0	0.58	1.92	0.75	0	0	0	0	0	0		0	0	0	0	0	0.07		0	0.09	0	0.75	0.81	0.12	0.37	0.2		1.41	0.81	0.9	0.5	0.92	0.2
WBGene00008912	ALG Class 26G	F17C8.7		0	0	2.69	5.02	3.61	0.11	0	0	0.06	0	0		0.11	0	0	0	0.14	0.07		0	0.09	0	0.83	1.09	0.39	0.31	0.2		0.44	0.63	0.8	0.98	1.02	1.01
WBGene00008920	ALG Class 26G	eef-1G, F17C11.9		0.07	0	1.98	2.85	2.49	0	0	0	0	0.11	0		0	0	0	0	0	0		0	0.18	0	0.25	0.41	0.12	0	0.1		0.71	0.35	0.45	0.55	0.92	0.4
WBGene00008935	ALG Class 26G	F18C12.4		0	0	0.7	1.07	0.75	0	0	0.06	0	0	0		0	0	0.06	0	0	0		0.14	0	0.13	0.5	0.2	0	0.18	0.1		1.59	0.86	0.58	0.4	1.11	1.42
WBGene00008948	ALG Class 26G	F19B6.1		0	0	0	0	0	0.07	0	0	0	0.11	0		0.07	0	0	0	0	0		0	0.09	0	0	0	0	0	0		0	0	0	0	0	0.2
WBGene00008950	ALG Class 26G	F19B6.4, wht-5		0	0	1.79	2.92	4.47	0	0	0	0	0	0		0	0	0	0	0.05	0		0	0	0	0.25	1.53	0.35	0.18	0.5		3.18	3.52	2.7	4.06	3.88	4.85
WBGene00009028	ALG Class 26G	F21H7.2		0	0	0.7	1.85	1.33	0	0	0	0	0	0		0	0	0	0	0.05	0		0.14	0.18	0	0.75	1.32	0.71	0.09	0.3		0.18	0.6	1.22	1.5	1.66	1.82
WBGene00009031	ALG Class 26G	F21H7.5		0	0	3.87	4.34	4.18	0.21	0.18	0.17	0	0.11	0		0.21	0.18	0.17	0.21	0.33	0.41		0.41	0.27	0.19	4.63	4.07	1.48	0.96	0.56		5.92	4.14	4.59	6.82	3.7	6.71
WBGene00009039	ALG Class 26G	F22B3.8		0	0	0.77	2.56	1.57	0	0	0.06	0	0	0		0	0	0.06	0	0	0		0	0.09	0.13	0.5	0.81	0	0.18	0		0.35	0.45	0.58	0.35	0.74	0.81
WBGene00009050	ALG Class 26G	F22D6.2		0	0	0.26	1.5	0.87	0	0	0.06	0	0.11	0		0	0	0.06	0	0.05	0		0	0	0.13	0.25	0.92	0.12	0	0.1		0.88	0.3	0.26	0.7	0.55	0.4
WBGene00009051	ALG Class 26G	F22D6.4, nduf-6		0	0	0.13	0.85	0.29	0	0	0	0	0	0		0	0	0	0	0	0.07		0	0	0.13	0.25	0.41	0.35	0	0.61		0.18	0.65	0.51	0.45	0.55	0.2
WBGene00009054	ALG Class 26G	F22D6.9		0	0	0.83	1.78	1.51	0	0	0	0	0	0		0	0	0	0	0	0.07		0	0	0	0.75	1.32	0.47	0.55	0.2		0.71	0.91	0.83	1.8	1.29	1.01
WBGene00009075	ALG Class 26G	F23B2.7		0	0	4.99	7.44	6.24	0.07	0.12	0.06	0	0	0		0.07	0.12	0.06	0	0.12	0.07		0.28	0.18	0.38	2.88	1.78	0.47	0.92	0.86		2.21	2.57	2.86	3.46	4.16	3.34
WBGene00009079	ALG Class 26G	F23B12.1		0	0	12.87	12.03	13.52	0	0.06	0	0	0.11	0		0	0.06	0	0.07	0	0.14		0.41	0.44	0.25	2.25	3.46	0.83	0.64	1.01		3.71	4.13	5.46	5.86	4.25	5.06
WBGene00009082	ALG Class 26G	dlat-1, F23B12.5		0	0	0	0.36	0.46	0	0	0	0	0	0		0	0	0	0	0	0		0	0	0	0	0	0	0.09	0		0.35	0.1	0.19	0.25	0	0.2
WBGene00009101	ALG Class 26G	F25B3.4		0	0	2.06	3.67	3.31	0.04	0	0.01	0	0	0		0.04	0	0.01	0.07	0.02	0		0.07	0.13	0.13	1.25	1.43	0.35	0.51	0.4		1.5	1.49	1.43	2	1.8	1.62
WBGene00009102	ALG Class 26G	F25B3.5		0	0	0.4	0.82	0.78	0	0	0.01	0	0	0		0	0	0.01	0	0	0		0	0.04	0.06	0.5	0.61	0.06	0.09	0.15		0.62	0.55	0.56	0.9	0.32	0.81
WBGene00009112	ALG Class 26G	F25D7.2, tag-353		0	0	0.13	0.57	0.41	0	0	0	0	0	0		0	0	0	0	0	0		0	0	0	0	0.1	0	0	0		0.18	0.1	0.06	0.1	0.18	0.4
WBGene00009115	ALG Class 26G	F25F2.1		0	0	1.34	1.14	0.93	0	0	0	0	0	0		0	0	0	0	0.05	0		0	0	0	0	0.61	0.35	0	0.1		0	0.4	0.51	0.5	0.74	0.81
WBGene00009122	ALG Class 26G	F25H2.11, tct-1		0	0	0.38	1.35	0.52	0.07	0	0.06	0	0	0		0.07	0	0.06	0	0.05	0.07		0.14	0	0	0.5	0.31	0.35	0	0		0.35	0	0.26	0.05	0.55	0
WBGene00009125	ALG Class 26G	F25H5.2		0	0	1.6	2.78	2.9	0.07	0	0	0	0	0		0.07	0	0	0	0	0		0	0.09	0	0.75	1.32	0.47	0.09	0.4		1.06	0.65	0.45	0.95	0	0.81
WBGene00009126	ALG Class 26G	F25H5.3, pyk-1		0	0	0	0.64	0.29	0	0	0	0	0.11	0		0	0	0	0	0	0		0.14	0.09	0	0.25	0.1	0	0	0.1		0.35	0.35	0.71	0.4	0.55	0.2
WBGene00009129	ALG Class 26G	F25H5.7		0	0	1.25	3.06	2.84	0	0	0	0	0	0		0	0	0	0.07	0.07	0.07		0	0.09	0	1	0.71	0.53	0.46	0.1		1.24	0.88	0.9	1.15	1.11	1.82
WBGene00009161	ALG Class 26G	cox-7C, F26E4.6		0	0	0.83	0.5	0.35	0.07	0.12	0.06	0	0	0		0.07	0.12	0.06	0	0.05	0.07		0	0	0.25	1	1.43	0.71	0.09	0.1		1.59	0.86	1.16	1.35	0.55	1.01
WBGene00009165	ALG Class 26G	F26E4.12, gpx-1		0	0	0.45	1.57	1.91	0	0.06	0	0	0	0		0	0.06	0	0	0	0.07		0.14	0.09	0	1.25	0.81	0.35	0.18	0.1		0.18	0.7	1.03	1.15	0.18	1.01
WBGene00009185	ALG Class 26G	F27C8.5		0	0	6.15	6.27	6.21	0.07	0	0.06	0	0	0		0.07	0	0.06	0.07	0.1	0.07		0.14	0.09	0.13	0.75	1.32	0.24	0.37	0.2		1.41	1.96	2.18	1.8	2.4	2.22
WBGene00009187	ALG Class 26G	F27D4.1		0	0	1.79	1.35	2.03	0	0	0	0	0	0		0	0	0	0	0	0		0	0	0	0.25	0.81	0	0.09	0.3		0.88	0.81	1.8	1.5	1.66	0.4
WBGene00009193	ALG Class 26G	F27E5.3		0	0	0.32	1.99	1.57	0	0	0	0	0	0		0	0	0	0	0	0.07		0	0	0	0	0.41	0.12	0	0.1		0.88	0.5	0.51	0.8	1.11	1.62
WBGene00009238	ALG Class 26G	F28H7.4, selt-1.2		0	0	1.15	1.35	1.74	0	0	0	0	0	0		0	0	0	0	0	0		0	0	0	0.5	0.2	0	0	0		0	0.25	0.06	0.05	0.18	0
WBGene00009239	ALG Class 26G	F28H7.6, irld-6		0	0	4.48	4.77	6.9	0.07	0.06	0	0	0	0		0.07	0.06	0	0	0.05	0.28		0	0.27	0.13	7	4.58	1.18	0.92	0.71		5.31	5.69	6.55	9.42	9.79	6.07
WBGene00009250	ALG Class 26G	F29D10.1		0	0	0.06	0.71	1.33	0	0	0	0	0	0		0	0	0	0	0	0		0	0	0	0	0.2	0	0	0		0.35	0.6	0.51	0.85	0.55	0.2
WBGene00009254	ALG Class 26G	capg-1, F29D11.2		0	0	0	0.71	0.41	0	0	0	0	0	0		0	0	0	0	0	0.14		0.14	0	0	0.5	0.61	0.24	0.28	0.1		0.53	1.36	1.03	1.15	1.66	0.61
WBGene00009269	ALG Class 26G	F30A10.12		0	0	0.38	1.28	1.16	0.07	0	0.06	0	0	0		0.07	0	0.06	0.07	0	0.07		0	0.09	0.13	1.5	1.22	0.12	0.09	0.3		0.53	0.7	0.96	1.2	1.85	1.21
WBGene00009274	ALG Class 26G	F30F8.5		0	0	0	0	0	0	0	0	0	0	0		0	0	0	0	0	0		0	0	0	0	0	0	0	0		0	0	0	0	0	0
WBGene00009307	ALG Class 26G	F32A11.1		0	0.06	0.64	0.78	0.55	0	0	0	0	0	0		0	0	0	0	0	0		0	0	0	0	0	0	0.09	0.1		0.18	0.05	0.13	0.15	0	0.2
WBGene00009308	ALG Class 26G	F32A11.3		0	0	1.66	2.74	2.55	0.07	0.12	0.06	0	0.11	0		0.07	0.12	0.06	0.07	0	0.03		0	0	0	1.5	1.27	0.12	0.09	0.1		3.18	1.71	1.41	1.55	1.85	2.22
WBGene00009313	ALG Class 26G	F32B4.2		0	0	3.91	6.2	5.74	0	0	0.06	0	0	0		0	0	0.06	0.07	0.05	0.07		0.28	0	0	2	2.34	0.35	0.18	0.5		1.06	1.41	0.96	1.75	1.66	2.22
WBGene00009321	ALG Class 26G	F32B6.4		0	0	4.1	3.42	4.7	0.07	0	0	0	0	0		0.07	0	0	0	0.05	0.14		0	0.18	0.13	1.25	1.63	1.42	1.19	1.62		2.83	1.66	2.5	2.51	3.14	3.03
WBGene00009344	ALG Class 26G	F32H2.7		0	0	11.72	11.18	13.4	0.07	0	0.06	0	0.32	0		0.07	0	0.06	0	0.14	0.62		0.28	0.27	0	4	3.56	0.95	1.38	1.51		4.6	4.48	4.11	4.61	4.07	5.46
WBGene00009353	ALG Class 26G	F33A8.5, sdhd-1		0	0	0.45	0.36	0.7	0	0	0	0	0	0		0	0	0	0	0	0		0	0	0	0	0.41	0.24	0.18	0		0.35	0.3	0.58	0.8	0	0.2
WBGene00009377	ALG Class 26G	F34D10.8		0	0	3.39	3.13	4.12	0	0	0.06	0	0.11	0		0	0	0.06	0	0.1	0.07		0	0.18	0	1.75	1.32	0.47	0.46	0.4		3.71	2.47	2.37	3.56	2.22	2.63
WBGene00009390	ALG Class 26G	F35C5.1		0	0	1.6	1.35	1.86	0	0	0	0	0	0		0	0	0	0	0	0		0.14	0	0	1	0.51	0.24	0.18	0		2.3	2.57	1.48	2.86	2.77	2.22
WBGene00009401	ALG Class 26G	F35C11.2		0	0	3.46	4.42	4.61	0.04	0	0.03	0	0	0		0.04	0	0.03	0.07	0.02	0.28		0.14	0.04	0.13	2.63	2.09	0.59	0.6	0.61		4.07	3.27	3.79	4.44	3.6	3.64
WBGene00009404	ALG Class 26G	F35C11.5		0	0	0.26	0.85	0.7	0	0	0	0	0	0		0	0	0	0	0	0		0	0	0	0.25	0.41	0	0.09	0		0.18	0.05	0.06	0.2	0	0.2
WBGene00009412	ALG Class 26G	F35E2.5		0	0	5.44	10.82	9.46	0.07	0	0	0	0	0		0.07	0	0	0	0.05	0.14		0.41	0.18	0.38	4	3.26	1.89	1.75	1.41		2.83	3.17	2.89	3.86	2.77	3.64
WBGene00009416	ALG Class 26G	F35E2.9		0	0	2.59	4.77	5.89	0	0.06	0	0	0	0		0	0.06	0	0	0.07	0.21		0.14	0.27	0	1.75	3.41	0.71	0.41	0.56		2.12	1.28	1.54	1.58	1.85	2.02
WBGene00009446	ALG Class 26G	F35H8.1		0	0	2.11	4.98	5.4	0.07	0.06	0.12	0	0	0		0.07	0.06	0.12	0	0.05	0.28		0.14	0.27	0.38	2.75	2.95	1.54	0.46	0.71		6.37	4.93	6.23	6.87	4.99	6.07
WBGene00009454	ALG Class 26G	F36A2.7		0	0	0.06	0.07	0.7	0	0	0	0	0.11	0		0	0	0	0	0.05	0		0	0	0	0.75	0.51	0.12	0.18	0		1.06	0.5	0.64	0.65	0.92	0.81
WBGene00009457	ALG Class 26G	F36A2.10		0	0	1.98	3.7	3.95	0.35	0.18	0.29	0	0	0		0.35	0.18	0.29	0.42	0.52	0.83		0.97	1.15	0.76	9.75	7.03	0.59	0.92	0.4		4.78	5.03	5.2	6.06	4.44	6.67
WBGene00009458	ALG Class 26G	F36A2.11		0	0	9.6	14.1	12.53	0.14	0.12	0.12	0	0	0		0.14	0.12	0.12	0	0.14	0.21		0.28	0.09	0.13	1.5	0.81	0.35	0.18	0.4		1.41	1.91	1.35	2.1	0.74	1.42
WBGene00009459	ALG Class 26G	F36A2.12		0	0	7.62	6.69	9.05	0	0	0	0	0.21	0		0	0	0	0	0.1	0.21		0.14	0.27	0	2.5	2.65	0.47	0.37	0.91		2.3	2.52	1.67	2.56	2.59	2.22
WBGene00009463	ALG Class 26G	F36D1.4		0	0	2.94	3.49	4.12	0	0.06	0.06	0	0	0		0	0.06	0.06	0.07	0.14	0.28		0	0	0	1	0.61	0.35	0.64	0.2		1.24	2.01	1.8	2.31	2.03	0.81
WBGene00009470	ALG Class 26G	F36D3.4		0	0	0.67	0.93	0.7	0	0.06	0.06	0	0	0		0	0.06	0.06	0.07	0	0.07		0.14	0	0.06	0.38	1.94	0.53	0.14	0.25		0.27	1.12	0.74	0.95	1.29	1.05
WBGene00009478	ALG Class 26G	F36F2.4, syx-7		0	0.06	2.75	2.42	4.12	0	0	0	0	0.21	0		0	0	0	0	0	0		0.14	0	0	1	1.32	0.12	0.09	0.3		1.06	1.66	1.22	2.66	2.22	1.82
WBGene00009491	ALG Class 26G	F36G9.15		0	0	0	0.28	0	0	0	0	0	0	0		0	0	0	0	0	0		0	0	0	0	0	0	0	0		0.18	0.1	0.19	0.1	0	0
WBGene00009492	ALG Class 26G	F36H1.3		0	0	4.74	6.84	6.32	0	0.06	0.06	0	0	0		0	0.06	0.06	0	0.19	0.07		0.14	0.09	0.13	2.5	2.75	0.35	0.55	0.4		2.48	2.06	1.93	1.75	2.77	2.63
WBGene00009501	ALG Class 26G	F37A8.1		0	0	2.5	2.71	1.91	0	0	0	0	0	0		0	0	0	0.07	0	0		0	0	0	0.5	0.71	0.12	0.28	0.1		1.06	1.84	0.9	1.85	1.48	1.01
WBGene00009513	ALG Class 26G	F37H8.4, sfxn-1.2		0	0	3.84	4.84	7.54	0	0	0.06	0	0.42	0		0	0	0.06	0	0	0		0	0.09	0.38	5.25	4.48	1.18	0.55	1.11		6.01	5.28	5.14	9.57	8.87	6.67
WBGene00009542	ALG Class 26G	copb-2, F38E11.5		0	0.06	0.38	0.43	0.12	0	0	0	0	0	0		0	0	0	0	0	0.07		0	0	0	0	0.41	0	0.09	0		0	0.2	0.06	0.15	0	0.61
WBGene00009548	ALG Class 26G	F38H4.4		0	0	1.86	3.28	2.44	0.07	0	0.06	0	0	0		0.07	0	0.06	0.07	0	0		0.14	0.09	0	1	0.61	0.12	0.37	0.2		0.53	0.45	0.77	0.5	0.37	0.61
WBGene00009550	ALG Class 26G	F38H4.6		0	0	7.62	10.54	12.05	0.05	0.02	0.08	0	0	0		0.05	0.02	0.08	0.02	0.03	0.16		0.05	0.21	0.08	3.58	2.55	0.98	0.7	0.91		3.24	3.2	3.68	4.04	3.88	4.52
WBGene00009581	ALG Class 26G	F40F9.3		0	0	2.3	4.56	3.42	0.07	0.06	0	0	0.21	0		0.07	0.06	0	0	0.05	0.07		0.14	0.09	0.13	0.25	0.92	0.12	0.09	0		1.06	0.55	0.83	0.45	1.66	1.21
WBGene00009583	ALG Class 26G	aagr-3, F40F9.6		0	0.06	0	0.28	0.64	0	0	0	0	0	0		0	0	0	0	0	0		0	0	0	0.25	0	0	0.09	0		0.18	0.15	0.06	0.2	0	0
WBGene00009589	ALG Class 26G	F40F11.4		0	0	0	0.07	0.12	0	0	0	0	0	0		0	0	0	0	0	0		0.14	0.09	0	0	0.2	0	0	0		0.18	0.3	0.26	0.25	0	0.2
WBGene00009605	ALG Class 26G	F40G12.10		0	0	13.64	16.31	17.93	0.35	0.12	0.06	0	0.32	0		0.35	0.12	0.06	0	0.14	0.55		0.28	0.44	0.25	5.25	8.35	1.89	1.93	1.51		6.01	6.49	7.06	8.47	9.06	9.5
WBGene00009641	ALG Class 26G	F42G4.2		0	0	3.1	2.99	2.52	0	0	0	0	0	0		0	0	0	0	0	0.07		0.14	0.18	0.13	0.75	1.07	0.59	0.46	0.56		1.77	1.86	1.38	2.31	1.2	2.12
WBGene00009643	ALG Class 26G	F42G4.6		0	0	10.02	13.78	11.64	0	0.15	0.09	0	0.37	0.07		0	0.15	0.09	0	0.12	0.41		0.48	0.38	0.38	6.13	6.67	2.24	1.65	1.51		4.51	4.57	3.85	5.26	5.73	5.06
WBGene00009680	ALG Class 26G	F44D12.3, msd-1		0	0	6.79	9.22	10.54	0.19	0.25	0.12	0.06	0.05	0.04		0.19	0.25	0.12	0.29	0.13	0.22		0.08	0.19	0.12	5.23	3.8	0.67	1.05	0.93		3.54	3.5	2.57	3.43	3.36	3.3
WBGene00009682	ALG Class 26G	F44D12.5, msd-2		0	0	5.6	9.04	8.57	0.05	0.13	0	0.06	0	0.04		0.05	0.13	0	0.08	0.16	0.22		0.22	0.14	0.12	3.11	2.58	0.73	0.59	0.63		3.01	2.6	2.28	2.5	2.34	2.9
WBGene00009683	ALG Class 26G	F44D12.6		0	0	2.27	2.49	2.26	0.07	0	0	0	0	0		0.07	0	0	0.07	0	0.07		0	0.09	0	0.5	0.51	0	0.18	0		0.35	0.43	0.39	0.35	0.37	0.2
WBGene00009684	ALG Class 26G	F44D12.7, msd-3		0	0	6.79	9.22	10.54	0.19	0.25	0.12	0.06	0.05	0.04		0.19	0.25	0.12	0.29	0.13	0.22		0.08	0.19	0.12	5.23	3.8	0.67	1.05	0.93		3.54	3.5	2.57	3.43	3.36	3.3
WBGene00009685	ALG Class 26G	F44D12.8		0	0	1.28	3.35	1.74	0	0	0	0	0	0		0	0	0	0.07	0	0.07		0	0	0.25	1.75	1.94	0.47	0.37	0.5		1.77	2.16	1.6	2.15	3.51	2.48
WBGene00009688	ALG Class 26G	F44E5.1		0	0	0.06	0.21	0.64	0	0	0	0	0	0		0	0	0	0.07	0	0		0.28	0	0.13	0.5	0.71	0.24	0.28	0.2		0.71	0.3	0.58	0.4	1.11	0.81
WBGene00009702	ALG Class 26G	F44F4.3		0.07	0	0.19	0	0.23	0	0	0	0	0	0		0	0	0	0	0	0		0	0.09	0	0	0.1	0	0	0		0.18	0.2	0.13	0.25	0.37	0
WBGene00009705	ALG Class 26G	F44F4.10		0	0	2.94	3.56	4.74	0.07	0	0	0	0	0		0.07	0	0	0	0.05	0.07		0.14	0.38	0	2.5	2.14	0.71	0.18	0.71		1.77	1.8	1.93	2.36	1.48	1.62
WBGene00009708	ALG Class 26G	F44G3.7		0	0	0.64	0.71	1.45	0	0	0	0	0	0		0	0	0	0	0	0		0	0.09	0	1.5	1.02	0.12	0.18	0.3		0.71	0.5	0.9	0.5	0.55	0.61
WBGene00009714	ALG Class 26G	F44G4.5		0	0	2.62	7.19	6.32	0	0	0	0	0.21	0		0	0	0	0	0	0.14		0.41	0	0.13	2	3.06	0.83	0.55	0.1		2.83	1.06	1.09	2.05	1.85	2.22
WBGene00009732	ALG Class 26G	cope-1, F45G2.4		0	0	0.13	0.14	0.23	0	0	0	0	0	0		0	0	0	0	0	0		0	0	0	0	0.1	0	0	0		0	0.1	0.32	0.45	0	0.4
WBGene00009754	ALG Class 26G	F46A9.1		0	0	0.58	0.28	0.52	0	0	0	0	0	0		0	0	0	0	0	0		0	0	0	0	0.2	0	0	0		0	0	0	0	0	0
WBGene00009759	ALG Class 26G	F46B3.4, ttr-12		0	0	1.41	1.07	0.41	0	0	0	0	0	0		0	0	0	0	0.14	0		0	0	0	0	0.1	0	0	0.1		0.53	0.15	0.32	0.35	0.18	0.2
WBGene00009782	ALG Class 26G	F46C5.7		0	0	0.38	1.64	1.33	0	0	0	0	0	0		0	0	0	0	0	0		0	0	0.13	0.5	0.81	0.12	0.18	0.4		1.59	1.26	0.64	1.25	1.11	1.01
WBGene00009783	ALG Class 26G	F46C5.8, rer-1		0	0	0.06	1.35	0.87	0	0	0	0	0	0		0	0	0	0	0	0		0	0	0	0	0.1	0.12	0	0		0.18	0.15	0.26	0.05	0	0
WBGene00009829	ALG Class 26G	F47G9.1, tmed-10		0	0	0.45	0.78	0.46	0	0	0	0	0	0		0	0	0	0	0	0		0.14	0	0	0.5	0.2	0	0	0		0.18	0.15	0.13	0.15	0.18	0.2
WBGene00009880	ALG Class 26G	F49C12.11		0	0	0.64	0.07	0.41	0	0	0	0	0	0		0	0	0	0	0	0		0	0	0	0.25	0.31	0	0	0		0.18	0.1	0.06	0.25	0.18	0
WBGene00009884	ALG Class 26G	F49C12.15		0	0	0.7	0.28	0.81	0	0	0	0	0	0		0	0	0	0	0.05	0		0.14	0	0	0.25	0.1	0.12	0	0		0.35	0.3	0.51	0.35	0.18	0.81
WBGene00009938	ALG Class 26G	F52F12.5		0	0	1.6	2.42	4.64	0	0	0	0.17	0	0		0	0	0	0	0	0.14		0	0	0	5	4.18	0.71	0.92	1.31		4.6	2.21	3.34	2.66	3.33	3.84
WBGene00009941	ALG Class 26G	F52F12.8		0	0	1.7	1.42	1.65	0	0	0	0	0.21	0		0	0	0	0	0.05	0		0	0.18	0.13	2	2.44	0.59	0	0.81		2.21	1.71	1.41	2.56	2.03	3.24
WBGene00009956	ALG Class 26G	F53B2.5		0.07	0	3.71	6.48	6.15	0	0.06	0	0	0.11	0		0	0.06	0	0	0.05	0.07		0.69	0.27	0.13	4.75	3.16	1.54	0.64	0.91		2.83	2.82	3.08	3.66	2.96	4.04
WBGene00009959	ALG Class 26G	F53B6.4		0	0	3.91	6.98	8.3	0.07	0.12	0.06	0	0.21	0		0.07	0.12	0.06	0.07	0.14	0.28		0.14	0	0	2.5	2.65	0.12	0.37	0		3.18	3.88	3.15	3.56	6.1	5.26
WBGene00009962	ALG Class 26G	F53B6.7		0	0	2.24	2.82	2.46	0	0.08	0	0	0	0		0	0.08	0	0.07	0	0		0.28	0.09	0	1.25	1.73	0	0.09	0.4		0.94	1.36	1.22	1.1	0.74	2.22
WBGene00010014	ALG Class 26G	F54B3.2		0	0	0.51	1.14	1.74	0	0	0	0	0	0		0	0	0	0	0	0		0	0	0	0.75	0.61	0	0.18	0		1.59	1.31	1.41	1.35	1.48	2.02
WBGene00010035	ALG Class 26G	F54C8.1		0	0	2.56	3.42	3.95	0.07	0	0.06	0	0	0		0.07	0	0.06	0.07	0.05	0.14		0.14	0	0.13	0.5	1.22	0.24	0.28	0.2		1.95	1.31	1.67	1.55	1.85	2.02
WBGene00010040	ALG Class 26G	F54C8.7		0.07	0	1.28	1.71	1.1	0	0	0	0	0	0.15		0	0	0	0	0	0		0.14	0	0.13	0.25	0.51	0	0.46	0.1		0.88	0.5	0.77	0.75	0.92	0.81
WBGene00010046	ALG Class 26G	F54D1.1		0	0	2.05	2.78	2.96	0	0	0	0	0	0		0	0	0	0	0	0.34		0.14	0.36	0	3.5	3.56	0.59	0.09	0.3		4.42	2.47	2.25	3.26	2.96	1.82
WBGene00010061	ALG Class 26G	F54E12.2		0	0	0.26	1.07	1.16	0	0.06	0.12	0.35	0.21	0.15		0	0.06	0.12	0	0.05	0		0	0.09	0.5	1	0.71	0.12	0.18	0.1		0.53	0.5	0.13	0.55	0.37	0.4
WBGene00010079	ALG Class 26G	F55A11.6		0	0	0.06	0.64	0.35	0	0	0	0	0	0		0	0	0	0	0	0.07		0	0.04	0	0.25	0.25	0.06	0.05	0.05		0.35	0.68	0.32	0.7	0.09	0.61
WBGene00010082	ALG Class 26G	F55A11.11		0	0	1.22	1.21	1.91	0	0	0	0	0	0		0	0	0	0	0	0.07		0	0.13	0	0.25	0.25	0.18	0.14	0.05		0.53	0.78	0.58	0.9	1.2	1.01
WBGene00010091	ALG Class 26G	F55C5.1, ssp-35		0	0	3.46	4.7	6.09	0.35	0	0.12	0.17	0	0		0.35	0	0.12	0.14	0.24	0.48		0.28	0	0.25	4	2.95	0.83	1.19	1.21		4.07	2.47	2.5	2.91	4.07	2.43
WBGene00010092	ALG Class 26G	F55C5.2		0	0	1.79	4.2	2.15	0	0	0	0.17	0	0		0	0	0	0	0	0		0.14	0	0	0.75	0.51	0.12	0	0.2		0.18	0.4	0.58	0.9	0	0.61
WBGene00010097	ALG Class 26G	F55C5.8, srpa-68		0	0	0.45	0.43	0.52	0	0	0	0	0	0		0	0	0	0	0	0		0	0	0	0.75	0.1	0	0.09	0		0	0.05	0.19	0.15	0	0
WBGene00010114	ALG Class 26G	F55D12.6		0	0	3.84	3.2	3.48	0.07	0.06	0	0	0.11	0		0.07	0.06	0	0.07	0	0.21		0	0	0.13	2	1.43	0.47	0.18	0.5		1.41	1.46	0.96	1.45	0.74	1.42
WBGene00010130	ALG Class 26G	F55H2.2, vha-14		0	0	0.13	0.14	0.12	0	0	0	0	0	0		0	0	0	0	0	0.07		0	0.09	0	0	0.2	0.12	0	0		0.35	0.35	0.32	0.35	0.37	0.2
WBGene00010136	ALG Class 26G	F55H12.5		0	0	1.6	2.07	2.67	0.07	0	0.06	0	0	0		0.07	0	0.06	0	0.05	0		0	0.09	0.25	1.25	0.61	0.47	0.28	0		1.77	0.91	0.71	1.3	0.92	2.02
WBGene00010139	ALG Class 26G	F56A8.3		0	0	0.96	1.85	0.99	0	0	0	0	0.21	0		0	0	0	0	0	0		0	0.09	0	0.5	0.61	0	0	0		0.35	0.2	0.45	0.65	0.37	0
WBGene00010147	ALG Class 26G	F56D5.2		0	0	2.11	4.06	4.24	0.07	0	0	0	0	0		0.07	0	0	0	0	0		0.14	0.09	0	0.25	1.12	0.24	0.18	0.2		1.24	1.01	1.35	1.55	0.74	0.61
WBGene00010155	ALG Class 26G	F56F3.4		0	0	1.34	1.78	1.1	0	0	0	0	0	0		0	0	0	0	0.1	0.14		0.14	0	0	1.75	1.32	0	0	0		1.06	0.91	0.96	1.25	0.74	1.21
WBGene00010175	ALG Class 26G	F56H11.2		0	0	0	0	0	0	0	0	0	0	0		0	0	0	0	0	0		0	0	0	0	0	0	0	0		0	0	0	0	0	0
WBGene00010181	ALG Class 26G	F57A8.6		0	0	1.34	0.64	0.99	0	0	0	0	0	0		0	0	0	0	0	0		0	0	0.13	0.25	0.41	0.12	0.09	0.2		0.53	0.4	0.51	0.65	0.92	0
WBGene00010241	ALG Class 26G	F58D2.2		0	0	7.11	8.05	10.21	0.14	0	0.06	0	0.11	0		0.14	0	0.06	0.07	0.19	0.41		0.28	0.18	0	3.25	4.38	1.3	0.37	0.61		6.19	3.42	3.72	5.11	2.96	4.65
WBGene00010246	ALG Class 26G	F58D5.7		0	0	3.78	7.19	8.53	0.07	0.06	0.12	0	0.11	0		0.07	0.06	0.12	0	0.1	0.48		0.41	0.27	0.13	2.5	1.12	0.47	0.46	0.4		1.41	1.96	1.73	1.85	3.7	2.22
WBGene00010254	ALG Class 26G	F58E6.5		0	0	1.02	2.28	2.44	0	0	0.06	0	0	0		0	0	0.06	0.07	0	0.28		0	0	0.13	0.5	0.92	0.24	0.37	0.2		2.12	1.11	1.48	1.15	0.74	1.01
WBGene00010265	ALG Class 26G	F58G1.3		0	0	5.47	4.59	4.9	0	0	0	0	0	0		0	0	0	0	0	0.07		0.41	0.18	0.13	1.5	0.81	1.18	0.64	0.81		2.74	3.12	2.76	3.28	3.05	3.54
WBGene00010284	ALG Class 26G	aman-2, F58H1.1		0.07	0	0.58	0.21	0.23	0	0	0	0	0	0		0	0	0	0	0	0		0	0	0.13	0	0	0	0	0		0	0.05	0	0.05	0.18	0.2
WBGene00010289	ALG Class 26G	F58H1.6		0	0	3.14	4.45	3.13	0	0.06	0	0	0	0		0	0.06	0	0	0	0.14		0.28	0.09	0.13	2	1.53	0.47	0.51	0.61		0.53	0.81	0.74	1.33	0.37	1.01
WBGene00010300	ALG Class 26G	F59A1.15		0	0	1.54	1.28	1.22	0.07	0	0	0	0	0		0.07	0	0	0	0	0.14		0	0	0.25	0.75	0.71	0.24	0.18	0.1		0.88	0.81	0.45	0.8	0.37	0
WBGene00010309	ALG Class 26G	F59B2.5, rpn-6.2		0	0	3.26	6.2	6.27	0	0	0.06	0	0.11	0		0	0	0.06	0	0	0		0.28	0.27	0	1.5	1.22	0.47	0.37	0.91		0.71	1.11	0.64	1.4	0.92	0.81
WBGene00010317	ALG Class 26G	F59B8.2, idh-1		0	0	0.64	0.71	1.28	0.07	0	0.06	0	0	0		0.07	0	0.06	0	0	0		0	0	0	0.5	0.71	0.12	0.28	0		0.35	0.86	0.45	1	1.29	0.61
WBGene00010324	ALG Class 26G	F59C6.3		0	0	4.35	8.4	7.14	0	0	0.12	0.17	0	0		0	0	0.12	0.07	0	0.07		0	0	0	1.25	1.12	0.35	0.28	0.3		0.88	0.75	1.03	1.2	1.29	1.01
WBGene00010326	ALG Class 26G	F59C6.5		0	0	0.58	1.35	1.16	0	0	0	0	0	0		0	0	0	0	0	0		0	0	0	0.25	0.1	0.12	0	0.1		0	0.35	0.06	0.3	0	0.2
WBGene00010333	ALG Class 26G	copz-1, F59E10.3		0	0	0	0	0.35	0	0	0	0	0	0		0	0	0	0	0	0		0	0	0	0	0.1	0	0.09	0		0.18	0	0	0.05	0.18	0
WBGene00010366	ALG Class 26G	H05L14.1		0	0	0.58	0.14	0.58	0	0	0	0	0	0		0	0	0	0	0	0		0	0	0.13	1	0.31	0	0.09	0.4		0.71	0.91	0.83	1.25	1.66	0.81
WBGene00010373	ALG Class 26G	H08M01.1		0	0	1.86	2.99	5.92	0.07	0.24	0.06	0	0.11	0		0.07	0.24	0.06	0.21	0.24	0.41		0.55	0.53	0.25	6.5	7.33	1.42	0.83	1.82		5.84	6.94	5.46	8.17	9.61	7.89
WBGene00010377	ALG Class 26G	H12D21.1, nspa-1		0	0	0.06	0.11	0.27	0	0	0	0	0	0		0	0	0	0	0	0		0	0.05	0	0.38	0.15	0.05	0.04	0.08		0.06	0.13	0.11	0.11	0.1	0.1
WBGene00010378	ALG Class 26G	H12D21.2		0	0	1.89	3.56	2.87	0.04	0.06	0	0	0.05	0		0.04	0.06	0	0	0.05	0.03		0.14	0	0.13	1.25	1.78	0.24	0.32	0.5		1.95	1.66	1.48	2.83	1.76	2.02
WBGene00010381	ALG Class 26G	H12D21.5		0	0	0.58	2.35	0.87	0	0	0	0	0	0		0	0	0	0	0.05	0		0	0	0	1	0.92	0.12	0	0.2		1.24	1.11	0.83	1.2	2.4	1.62
WBGene00010405	ALG Class 26G	erfa-3, H19N07.1		0	0	0.83	1.14	1.39	0	0	0	0	0.11	0		0	0	0	0	0	0		0.14	0.09	0	0	0	0.24	0.09	0.5		0.53	0.55	0.26	0.65	0.18	0.4
WBGene00010419	ALG Class 26G	atp-1, H28O16.1		0	0	1.02	0.5	1.1	0	0	0	0	0.11	0		0	0	0	0	0	0		0.34	0	0	0.5	0.31	0.12	0	0		0.35	0.1	0.32	0.45	0	0.4
WBGene00010460	ALG Class 26G	clec-142, K01C8.8		0	0	0.58	0.93	1.1	0.14	0	0	0	0	0		0.14	0	0	0	0	0		0.14	0	0	0.75	1.43	0	0.28	0.1		1.95	1.41	0.96	2.05	2.03	1.42
WBGene00010466	ALG Class 26G	K01D12.7		0	0	13.43	15.52	16.92	0.21	0.2	0.03	0	0.11	0.07		0.21	0.2	0.03	0.04	0.24	0.51		0.53	0.47	0.32	7.17	7.32	1.61	1.07	1.68		3.3	4.78	3.86	5.43	6.07	4.85
WBGene00010474	ALG Class 26G	K01D12.15		0	0	14.71	16.31	17.97	0.14	0.2	0.03	0	0.21	0.07		0.14	0.2	0.03	0.04	0.29	0.51		0.53	0.47	0.32	8.92	7.32	1.97	1.26	1.89		4.19	5.33	5.34	6.88	6.62	7.28
WBGene00010485	ALG Class 26G	ant-1.3, K01H12.2		0	0	5.03	5.66	5.77	0.07	0	0.06	0	0	0		0.07	0	0.06	0	0	0.21		0	0.13	0	1.13	1.37	0.12	0	0.1		0.18	0.38	0.77	0.7	0.92	0.3
WBGene00010486	ALG Class 26G	K01H12.4		0	0	1.73	2.21	1.45	0	0	0.06	0	0	0		0	0	0.06	0	0.05	0		0.14	0.09	0	0.75	1.02	0.12	0.55	0.3		4.42	3.42	3.85	4.96	3.33	3.24
WBGene00010491	ALG Class 26G	K02B7.3		0	0	0	0.14	0.41	0	0	0	0	0	0		0	0	0	0	0	0		0	0	0	0	0.2	0	0.09	0.2		0.18	0.3	0.06	0.25	0.18	0.2
WBGene00010496	ALG Class 26G	K02B12.3, sec-12		0	0	0	0.57	0.52	0	0	0	0	0	0		0	0	0	0	0	0		0	0.09	0	0.5	0.1	0	0.09	0		0.35	0.05	0.26	0.15	0	0.4
WBGene00010510	ALG Class 26G	ent-3, K02E11.1		0	0	0.64	0.78	0.87	0.07	0	0	0	0	0		0.07	0	0	0	0	0		0	0	0	0.25	0.2	0.24	0.09	0.2		1.06	0.5	0.45	0.45	0.55	1.01
WBGene00010544	ALG Class 26G	K03H1.9		0	0	0.19	1.85	0.7	0	0	0	0	0	0		0	0	0	0.07	0.05	0.07		0	0	0	0.75	1.12	0.12	0.28	0.2		1.24	0.96	1.28	1.15	2.22	0.61
WBGene00010547	ALG Class 26G	K03H1.12		0	0	7.11	13.74	11.66	0	0	0	0	0.11	0		0	0	0	0.07	0	0.07		0.28	0.36	0.25	7	3.56	1.54	1.29	1.51		4.95	4.28	3.4	5.81	4.62	7.68
WBGene00010574	ALG Class 26G	K04H4.5		0	0	2.5	4.77	3.37	0.07	0	0	0	0	0		0.07	0	0	0	0.1	0.07		0.28	0.09	0.25	1.25	1.53	0.24	0.28	0.2		1.24	1.66	1.73	2.31	2.77	1.82
WBGene00010611	ALG Class 26G	K07A1.4		0	0	0.06	0.36	0.93	0	0	0	0	0	0		0	0	0	0	0	0		0	0	0.13	0.5	0.51	0	0.09	0		0.18	0.6	0.96	0.3	0.74	1.01
WBGene00010631	ALG Class 26G	cash-1, K07C5.8		0	0	0.64	1.99	1.51	0	0	0	0	0.11	0		0	0	0	0	0	0		0	0.18	0	0.75	0.92	0	0.28	0.3		0.53	0.55	0.45	0.5	0.74	0.61
WBGene00010634	ALG Class 26G	K07F5.6		0	0	1.79	1.71	1.97	0	0	0	0	0.11	0		0	0	0	0	0.05	0.07		0	0	0	0.25	0.41	0.12	0.18	0.1		0	0.25	0.45	0.6	0.92	0.2
WBGene00010651	ALG Class 26G	K08C9.2		0	0	6.4	8.9	11.66	0.07	0	0.12	0.17	0	0.15		0.07	0	0.12	0	0.14	0.41		0.55	0.44	0	2	3.36	0.24	0.92	0.5		5.31	4.33	4.11	4.96	4.44	4.85
WBGene00010672	ALG Class 26G	K08E7.4		0	0	1.09	0.85	0.64	0.07	0	0.06	0	0	0		0.07	0	0.06	0	0	0		0.14	0	0	0.5	0.2	0	0.18	0.1		0.35	0.25	0.06	0.45	0.74	0.4
WBGene00010678	ALG Class 26G	K08F4.3		0	0	3.33	3.06	2.78	0	0	0	0	0	0		0	0	0	0	0.05	0.21		0	0.09	0	1	0.31	0	0	0		0.53	0.3	0.51	0.15	0.37	0.81
WBGene00010679	ALG Class 26G	K08F4.5		0	0	7.3	9.76	9.08	0	0.12	0.03	0	0	0		0	0.12	0.03	0.14	0.14	0.28		0.14	0.44	0.25	5.13	5.65	1.89	1.56	2.32		5.31	4.71	5.14	5.51	5.73	5.26
WBGene00010682	ALG Class 26G	K08F8.5		0	0	3.52	5.84	4.99	0	0	0.06	0	0	0		0	0	0.06	0	0	0.28		0.14	0.36	0.13	2.75	2.04	0.47	0.18	0.61		0.88	0.96	1.22	1.35	1.11	2.22
WBGene00010685	ALG Class 26G	aipl-1, K08F9.2		0	0	0.77	0.71	0.35	0	0	0	0	0	0.15		0	0	0	0	0	0.07		0	0	0	0	0.31	0	0	0		0.35	0.15	0.32	0.4	0.18	0.61
WBGene00010712	ALG Class 26G	K09B11.5		0	0	0.35	0.78	0.67	0	0	0.03	0	0	0		0	0	0.03	0	0	0		0	0.04	0	0.25	0.15	0.06	0	0		0	0.03	0.1	0.08	0.37	0.1
WBGene00010719	ALG Class 26G	K09E4.1		0	0	2.43	3.2	3.05	0.07	0.12	0.17	0	0.11	0		0.07	0.12	0.17	0.07	0.19	0.41		0.28	0.09	0.25	2.5	2.24	0.24	0.37	0.61		1.59	2.31	2.12	2.46	2.03	2.22
WBGene00010728	ALG Class 26G	K09G1.2		0	0	11.01	20.3	15.66	0.14	0.06	0	0	0.21	0		0.14	0.06	0	0	0.05	0.21		0.41	0.27	0.5	2.25	2.24	0.47	0.64	0.5		3.18	2.82	2.44	3.51	2.77	2.63
WBGene00010734	ALG Class 26G	K10C8.1, parn-1		0	0	0	0	0.12	0	0	0	0.35	0	0		0	0	0	0.28	0	0		0.41	0	0	0	0.1	0.12	0	0		0	0	0.06	0.1	0	0
WBGene00010763	ALG Class 26G	K10H10.7		0	0	2.56	2.92	3.77	0	0	0	0	0	0		0	0	0	0	0	0		0	0	0.25	1.25	0.71	0.24	0.28	0.3		0.88	0.91	0.77	1.35	0.37	1.62
WBGene00010779	ALG Class 26G	K11H3.2		0	0	4.48	4.13	6.03	0	0	0	0	0	0.15		0	0	0	0	0.05	0		0.14	0	0	3.75	3.26	0.71	0.37	0.3		0.88	2.42	1.6	2.66	2.59	2.22
WBGene00010871	ALG Class 26G	M05B5.3		0	0	1.66	2.99	2.49	0	0	0	0	0.11	0		0	0	0	0	0	0		0.14	0	0	0.25	0.71	0.12	0	0.1		0.18	0.75	0.58	0.65	0.55	0.2
WBGene00010874	ALG Class 26G	M05D6.1		0	0	1.31	1.78	1.1	0.14	0	0	0.17	0.11	0		0.14	0	0	0	0.05	0.14		0	0	0	1.38	1.27	0.24	0.18	0.5		1.5	1.28	0.64	1.78	0.65	0.71
WBGene00010876	ALG Class 26G	M05D6.3		0	0	3.46	4.49	4.38	0.04	0	0.03	0	0	0		0.04	0	0.03	0.07	0.02	0.28		0.14	0.04	0.13	2.63	2.09	0.59	0.6	0.61		4.42	3.32	3.92	4.49	3.6	3.64
WBGene00010900	ALG Class 26G	M28.9		0	0	0.7	0.64	0.35	0	0	0	0	0	0		0	0	0	0	0	0.07		0	0	0	0.25	0.2	0	0	0		0.53	0.5	0.45	0.65	0.18	0.61
WBGene00010906	ALG Class 26G	M88.3		0	0	3.65	4.09	3.19	0.07	0	0.06	0	0	0		0.07	0	0.06	0	0.12	0.07		0	0.04	0	1.88	1.22	0.41	0.18	0		1.86	1.03	0.77	1.55	2.22	1.52
WBGene00010915	ALG Class 26G	M110.7		0	0	0.19	0.21	0.58	0	0	0	0	0	0		0	0	0	0	0	0		0	0.09	0	0.5	0.61	0.12	0.18	0.1		1.59	2.01	1.73	2.81	3.14	3.84
WBGene00010920	ALG Class 26G	M117.4		0	0	5.12	8.51	6.64	0.07	0	0	0	0.11	0		0.07	0	0	0	0.14	0.14		0.14	0.13	0.13	5.5	4.02	0.95	1.1	1.51		5.84	7.4	7.22	9.15	6.38	8.59
WBGene00010943	ALG Class 26G	M176.4		0	0	0	0.71	0.35	0	0	0	0	0	0		0	0	0	0	0	0		0	0	0	0	0.2	0.24	0.09	0		1.06	0.5	0.58	0.75	0.37	0.4
WBGene00010959	ALG Class 26G	MTCE.11, nduo-1		0	0	0	0	0	0	0	0	0	0	0		0	0	0	0	0	0		0	0	0	0	0	0	0	0		0	0	0	0	0	0
WBGene00010961	ALG Class 26G	MTCE.16, nduo-2		0	0	0	0	0	0	0	0	0	0	0		0	0	0	0	0	0		0	0	0	0	0	0	0	0		0	0	0	0	0	0
WBGene00010963	ALG Class 26G	MTCE.25, nduo-4		0	0	0	0	0	0	0	0	0	0	0		0	0	0	0	0	0		0	0	0	0	0	0	0	0		0	0	0	0	0	0
WBGene00010964	ALG Class 26G	ctc-1, MTCE.26		0	0	0	0	0	0	0	0	0	0	0		0	0	0	0	0	0		0	0	0	0	0	0	0	0		0	0	0	0	0	0
WBGene00010966	ALG Class 26G	MTCE.34, nduo-3		0	0	0	0	0	0	0	0	0	0	0		0	0	0	0	0	0		0	0	0	0	0	0	0	0		0	0	0	0	0	0
WBGene00010967	ALG Class 26G	MTCE.35, nduo-5		0	0	0	0	0	0	0	0	0	0	0		0	0	0	0	0	0		0	0	0	0	0	0	0	0		0	0	0	0	0	0
WBGene00010980	ALG Class 26G	R02D5.7		0	0	2.59	2.31	2.38	0	0.03	0.06	0	0	0		0	0.03	0.06	0.07	0.05	0.07		0	0	0	0.25	0.66	0.3	0.05	0.05		0.53	0.53	0.64	0.6	0.18	0.81
WBGene00010990	ALG Class 26G	R03D7.4, tceb-3		0	0	0.96	0.93	0.58	0.07	0	0	0	0	0.29		0.07	0	0	0	0	0		0.14	0.27	0	0.25	0.41	0	0.09	0.2		0.18	0.2	0	0.2	0.18	0.4
WBGene00010991	ALG Class 26G	R03D7.5		0	0.06	1.79	1.42	1.57	0	0	0	0	0	0		0	0	0	0.07	0.05	0		0.14	0	0	0	0.41	0	0.09	0		0.18	0.35	0.39	0.55	0.18	0.4
WBGene00010992	ALG Class 26G	R03D7.8		0	0	0.38	1.71	1.28	0	0	0	0	0	0		0	0	0	0	0	0		0	0	0	0.5	0.51	0.24	0.18	0		1.06	0.75	0.77	1.25	0.92	1.42
WBGene00011001	ALG Class 26G	R04B5.1		0	0	1.92	1.92	2.49	0	0	0	0	0	0		0	0	0	0	0	0.07		0	0	0.13	0.5	0.41	0.24	0.18	0.2		1.06	0.15	0.06	0.05	0.18	0.2
WBGene00011008	ALG Class 26G	R04B5.11		0	0	1.41	1.21	1.51	0	0	0	0	0	0		0	0	0	0	0	0.07		0	0	0	1	1.02	0	0	0.3		0	0.25	0.26	0.6	0.74	0.2
WBGene00011015	ALG Class 26G	R04F11.2		0	0	0.19	0.85	0.46	0	0	0.06	0	0	0		0	0	0.06	0	0	0		0.14	0	0	0.5	0.1	0.12	0.09	0		0	0.2	0.26	0.2	0.37	0.4
WBGene00011027	ALG Class 26G	R05D7.2		0	0	1.02	1.35	1.51	0	0	0	0	0.21	0		0	0	0	0	0	0		0.14	0.09	0	0	1.22	0.24	0.18	0.3		1.24	0.65	0.77	1.55	0.92	0.4
WBGene00011039	ALG Class 26G	R05H5.4		0	0	3.36	3.85	5.13	0.04	0	0	0	0	0		0.04	0	0	0	0.05	0		0.28	0	0	1.75	1.53	0.12	0.64	0.4		0.8	1.28	1.25	1.75	2.03	2.83
WBGene00011040	ALG Class 26G	arv-1, R05H5.5		0	0	0.16	0.21	0.44	0.04	0	0	0	0	0		0.04	0	0	0	0	0		0	0	0	0.25	0.31	0	0	0.1		0.09	0.18	0.1	0.2	0.37	0.2
WBGene00011061	ALG Class 26G	R06C7.1, wago-1		0	0	0	0.07	0.46	0	0	0	0.35	0	0.15		0	0	0	0	0	0		0.14	0	0	0	0.1	0	0	0		0.18	0.15	0.26	0.05	0	0.4
WBGene00011110	ALG Class 26G	prdx-3, R07E5.2		0	0	0.58	1.21	1.16	0	0.06	0	0	0.21	0		0	0.06	0	0	0	0.14		0	0.09	0	0.5	0.81	0.35	0.09	0.2		0.53	0.4	0.45	0.35	1.11	0.2
WBGene00011114	ALG Class 26G	R07E5.6		0	0	0.9	2.14	2.44	0	0	0	0	0	0.15		0	0	0	0	0.1	0.07		0.28	0.09	0	1.5	1.02	0.12	0.37	0.71		1.24	0.96	1.16	1.55	1.11	1.42
WBGene00011120	ALG Class 26G	R07E5.15		0	0	1.34	3.35	4.94	0.07	0	0.03	0.06	0.05	0		0.07	0	0.03	0	0.02	0.14		0.07	0.18	0	0.83	0.73	0.1	0.21	0.15		0.62	1.03	1.28	1.03	1.48	1.31
WBGene00011133	ALG Class 26G	R08A2.2		0	0	7.23	10.86	12.3	0	0	0.03	0.35	0.11	0		0	0	0.03	0.14	0.14	0.45		0.14	0.09	0.38	2.5	4.48	1.18	0.6	0.71		2.3	1.36	1.35	1.7	1.94	1.31
WBGene00011134	ALG Class 26G	R08A2.3, ssp-33		0	0	0.8	1.71	1.97	0	0	0	0.17	0.11	0		0	0	0	0	0.1	0.28		0.07	0.27	0.13	0.25	2.14	0.59	0.55	0.3		0.88	1.46	1.12	0.7	1.48	1.52
WBGene00011155	ALG Class 26G	R09B3.2, rbm-3.1		0	0	3.91	3.56	2.96	0.07	0	0	0	0	0		0.07	0	0	0	0.05	0.07		0.41	0.27	0	1.5	0.61	0.59	0.55	0.5		0.88	1.06	0.45	1.7	0.92	0.61
WBGene00011156	ALG Class 26G	R09B3.3, rbm-3.2		0	0	12.55	17.23	14.62	0	0.06	0	0	0.11	0.15		0	0.06	0	0	0.14	0.07		0	0	0.13	1	1.43	1.06	0.28	0.61		0.18	0.55	0.45	0.85	0.37	0.61
WBGene00011171	ALG Class 26G	R09E10.1		0	0	3.17	3.63	3.28	0	0	0	0	0	0		0	0	0	0.07	0.1	0.1		0.14	0.14	0.13	1.88	1.68	0.35	0.09	0.45		2.74	1.23	1.64	1.86	1.76	1.82
WBGene00011176	ALG Class 26G	R09E10.6		0	0	0.26	0.14	0.46	0	0	0	0	0	0		0	0	0	0	0	0.07		0	0.09	0	0	0.1	0	0	0		0.88	0.45	0.39	0.6	0.37	0.61
WBGene00011191	ALG Class 26G	R10D12.10		0	0	1.34	2.07	1.51	0	0	0.06	0	0	0		0	0	0.06	0	0.05	0		0.14	0	0.13	1.25	0.81	0.12	0.09	0.3		1.06	0.7	0.64	0.9	1.66	1.62
WBGene00011200	ALG Class 26G	R10E4.3		0	0	2.18	4.06	3.25	0	0	0	0	0	0		0	0	0	0	0.02	0.21		0	0.04	0	1	0.71	0	0.09	0.2		0.71	0.55	0.74	0.75	0.46	0.81
WBGene00011214	ALG Class 26G	R10E9.2		0	0	2.69	3.06	4.24	0	0	0	0	0	0		0	0	0	0	0.05	0.28		0.14	0	0	1.25	2.24	0.47	0.28	0.2		2.65	2.01	1.99	2.46	1.85	2.22
WBGene00011215	ALG Class 26G	R10E9.3		0	0	3.2	6.34	5.34	0	0.06	0	0	0	0		0	0.06	0	0	0	0.07		0.14	0	0	0.75	0.61	0.24	0.64	0.5		0.71	0.6	0.39	0.7	1.29	2.02
WBGene00011241	ALG Class 26G	mpz-5, R11A8.8		0	0	5.51	8.55	9.22	0.14	0	0.06	0.17	0	0		0.14	0	0.06	0	0.14	0.28		0.28	0.62	0.25	11.75	9.17	1.77	1.38	2.02		5.13	5.23	5.71	5.46	6.1	7.08
WBGene00011273	ALG Class 26G	R53.4		0	0	1.02	0.85	0.41	0	0	0	0	0	0		0	0	0	0	0	0.07		0	0.09	0	0.25	0.31	0.12	0.09	0.2		0.71	0.96	1.09	1.1	0.92	1.01
WBGene00011290	ALG Class 26G	R102.3		0	0	0.7	1.92	1.51	0	0	0	0	0	0		0	0	0	0	0.05	0		0	0	0	0.5	0.61	0.35	0.09	0		0.88	0.91	0.96	1.4	1.29	1.82
WBGene00011297	ALG Class 26G	R102.10		0	0	1.41	1.78	1.22	0	0.06	0	0	0	0		0	0.06	0	0	0.05	0		0	0	0	1	1.02	0.24	0.18	0.3		1.06	0.4	0.77	1.4	0.92	0.61
WBGene00011322	ALG Class 26G	irld-14, T01C3.5		0	0	3.84	8.55	7.31	0.21	0	0	0	0.21	0		0.21	0	0	0	0	0.28		0.28	0.09	0.25	2.5	3.87	0.83	0.46	0.61		2.48	2.97	2.63	3.41	3.88	4.04
WBGene00011329	ALG Class 26G	T01D3.5, zipt-9		0	0	0.64	0.21	0.41	0	0	0	0	0	0		0	0	0	0	0	0		0	0.09	0.13	0.25	0.1	0	0	0		0	0.15	0.06	0.05	0	0
WBGene00011351	ALG Class 26G	T01H3.5		0	0	6.15	4.91	5.16	0	0.06	0.06	0	0	0		0	0.06	0.06	0	0.14	0.28		0.14	0.18	0.13	0.75	1.02	0.47	0.09	0.2		1.41	1.01	1.54	0.85	1.11	1.42
WBGene00011401	ALG Class 26G	T03F6.6		0	0	2.3	4.27	3.77	0	0.06	0.06	0	0	0		0	0.06	0.06	0	0.05	0.07		0.14	0	0	1.75	2.34	0.24	0.46	0.2		1.06	0.91	1.16	1.4	0.92	0.2
WBGene00011414	ALG Class 26G	T04A8.13		0	0	1.79	2.92	3.71	0	0.06	0	0	0.32	0		0	0.06	0	0	0.1	0		0.28	0.18	0.38	1.5	2.04	0.35	0.18	0.61		1.95	1.61	1.35	1.8	1.66	2.02
WBGene00011425	ALG Class 26G	T04B2.7		0	0	0.06	0.43	0.75	0	0	0.06	0	0	0		0	0	0.06	0	0.05	0.07		0.28	0.09	0	0.5	0.41	0.47	0	0.1		1.77	1.96	1.73	1.95	1.48	1.42
WBGene00011438	ALG Class 26G	T04F3.3		0	0	4.87	4.84	6.61	0	0.06	0.06	0	0.32	0		0	0.06	0.06	0	0.05	0.28		0.14	0.09	0.13	4.5	3.77	0.95	0.83	1.01		6.9	7.4	6.55	9.42	8.32	7.48
WBGene00011466	ALG Class 26G	T05C12.1		0	0	2.56	4.27	5.4	0	0	0	0	0.11	0.15		0	0	0	0.07	0	0.21		0.14	0	0	1.5	1.53	0.47	0.18	0.2		1.24	1.96	2.5	2.46	2.22	1.62
WBGene00011467	ALG Class 26G	decr-1.3, T05C12.3		0	0	1.34	2.14	1.04	0	0	0	0	0	0		0	0	0	0.14	0	0		0	0	0.13	0.25	0.61	0.3	0	0.1		0.8	0.5	0.51	0.68	0.46	0.3
WBGene00011469	ALG Class 26G	dylt-3, T05C12.5		0	0	1.02	0.57	0.75	0	0	0	0	0	0		0	0	0	0.07	0	0		0	0	0	0.5	0.2	0	0	0.1		0.53	0.4	0.45	0.75	0.37	0.4
WBGene00011472	ALG Class 26G	T05C12.9		0	0	0.38	0.28	0.46	0	0	0	0	0	0		0	0	0	0	0	0		0	0	0	0.25	0.51	0.12	0.09	0		0.53	0.4	0.26	0.3	0.18	0
WBGene00011480	ALG Class 26G	enpl-1, T05E11.3		0	0	1.54	2.71	2.09	0	0.06	0	0	0.11	0		0	0.06	0	0	0	0		0.14	0	0	0	0.1	0.12	0	0.1		0.18	0.05	0.19	0.1	0	0.2
WBGene00011481	ALG Class 26G	imp-2, T05E11.5		0	0	0.38	0.78	0.81	0	0	0	0	0	0		0	0	0	0	0	0		0.14	0	0.13	0.25	0.51	0.12	0.18	0.1		0.18	0.2	0.19	0.15	0.55	0.4
WBGene00011488	ALG Class 26G	nra-2, T05F1.1		0	0	0.77	0.5	0.12	0	0	0	0	0	0		0	0	0	0	0	0		0	0.18	0	0.75	0	0	0	0		0	0.15	0	0.3	0	0
WBGene00011491	ALG Class 26G	T05F1.5		0	0	0.06	1.14	0.46	0	0	0	0	0	0		0	0	0	0	0	0		0	0	0	0.75	0.1	0	0.37	0.1		0.35	0.35	0.45	0.45	0	0.2
WBGene00011493	ALG Class 26G	T05F1.8		0	0	2.11	4.66	2.99	0	0	0	0	0.11	0.29		0	0	0	0	0.05	0		0	0.04	0	0.63	0.36	0.33	0.18	0.05		0.8	0.65	0.9	0.73	0.83	1.11
WBGene00011499	ALG Class 26G	T05G5.4		0.07	0.06	3.46	6.05	5.92	0	0.06	0	0	0	0		0	0.06	0	0	0.1	0		0.28	0.27	0.13	2	1.94	0.24	0.18	0.3		3.36	3.32	3.27	4.26	3.7	3.24
WBGene00011510	ALG Class 26G	pdha-1, T05H10.6		0	0	0.32	1.28	0.58	0	0	0	0	0.11	0		0	0	0	0.07	0	0		0.14	0	0.13	0.25	0.41	0	0.18	0		0.35	0.4	0.13	0.3	0.18	0.61
WBGene00011527	ALG Class 26G	cchl-1, T06D8.6		0	0	0.26	1	0.64	0	0	0	0	0	0		0	0	0	0	0	0		0	0	0	0.25	0.2	0	0	0		0.35	0	0.13	0.25	0	0.2
WBGene00011529	ALG Class 26G	T06D8.9		0	0	1.41	2.78	2.32	0	0	0	0	0	0		0	0	0	0	0	0.14		0.14	0.09	0	0	0.51	0	0	0.1		1.06	0.65	0.64	0.8	0.92	0.4
WBGene00011533	ALG Class 26G	T06E4.5		0	0	1.15	2.56	2.32	0	0	0	0	0	0		0	0	0	0	0	0		0.28	0	0	1	1.02	0	0.28	0.2		0.53	0.75	0.77	1.2	0.74	1.62
WBGene00011587	ALG Class 26G	anp-1, T07F10.1		0	0	0.32	1	1.16	0	0	0.06	0	0	0		0	0	0.06	0	0	0.07		0	0	0	0.75	0.81	0.24	0.09	0		1.59	0.4	0.45	0.7	0.55	0.81
WBGene00011638	ALG Class 26G	ostb-1, T09A5.11		0	0	0.58	0.93	1.57	0	0	0.12	0	0	0.15		0	0	0.12	0.07	0	0		0	0	0	0.25	0.1	0.24	0.18	0.1		0.18	0.6	0.51	0.55	0.74	0.61
WBGene00011734	ALG Class 26G	mlc-5, T12D8.6		0	0	0.26	0.71	0.75	0	0.06	0	0	0	0		0	0.06	0	0	0	0		0	0	0	0.25	0.2	0.24	0	0.1		0.71	0.5	0.51	0.3	0.55	0.61
WBGene00011749	ALG Class 26G	ssp-36, T13F2.12		0	0	1.7	3.49	2.62	0	0	0	0	0.05	0		0	0	0	0.07	0.05	0.24		0.07	0	0	0.83	0.46	0.18	0.09	0		0.41	0.77	1.14	1.04	0.65	0.81
WBGene00011775	ALG Class 26G	copg-1, T14G10.5		0	0	0.58	0.14	0.7	0	0	0	0	0	0		0	0	0	0	0	0		0	0	0	0	0.1	0	0	0.1		0	0.35	0.19	0.3	0.18	0.2
WBGene00011777	ALG Class 26G	T14G10.8		0	0	2.94	3.35	3.02	0.07	0	0	0	0	0		0.07	0	0	0.07	0	0		0.55	0.27	0	1	1.43	0.35	0.18	0.81		2.3	1.96	1.8	3.01	1.48	2.02
WBGene00011795	ALG Class 26G	T16A9.5		0	0	1.06	2.14	1.89	0	0	0	0	0	0		0	0	0	0	0.12	0		0	0.18	0	1.5	1.07	0.06	0.23	0.5		1.5	2.24	1.51	1.53	2.96	2.02
WBGene00011808	ALG Class 26G	T16G12.7		0	0	5.19	7.62	5.98	0	0.06	0	0	0.21	0		0	0.06	0	0.07	0	0.21		0	0.09	0	2.5	1.73	0.83	0.74	0.2		2.3	2.16	2.25	3.26	3.14	2.43
WBGene00011835	ALG Class 26G	pgap-1, T19B10.8		0	0	0.51	0.5	0.52	0	0	0	0	0.21	0.15		0	0	0	0	0.05	0		0	0	0	0.25	0.2	0.12	0	0.2		0.71	0.35	0.51	0.5	0	0.4
WBGene00011867	ALG Class 26G	chc-1, T20G5.1		0	0	1.66	2.92	2.26	0	0	0	0	0	0		0	0	0	0	0	0		0	0.18	0	1	0.61	0.47	0.09	0.2		0.88	0.75	0.64	1.1	1.11	1.42
WBGene00011884	ALG Class 26G	enol-1, T21B10.2		0	0	0.26	0.85	1.39	0	0	0.06	0	0.11	0		0	0	0.06	0	0	0.07		0	0	0	0.75	0.31	0	0	0.1		0.71	0.55	0.64	1.05	0.55	1.01
WBGene00011892	ALG Class 26G	erh-1, T21C9.4		0	0	0.26	0.71	0.64	0	0	0	0	0	0		0	0	0	0	0	0.07		0	0	0	0.25	0.41	0.12	0	0		0.35	0.2	0.13	0.1	0.55	0.2
WBGene00011909	ALG Class 26G	T22A3.6		0	0	0.7	1.64	2.15	0	0	0	0	0	0		0	0	0	0	0	0.07		0.14	0	0	0.5	0.81	0	0.18	0.1		1.77	0.65	0.96	1.25	1.66	0.61
WBGene00011910	ALG Class 26G	alg-3, T22B3.2		0	0	2.14	4.74	4.29	0.07	0	0	0	0	0		0.07	0	0	0	0.1	0.17		0.28	0	0.13	0.75	0.81	0.24	0.18	0.1		0.88	1.11	0.8	1.85	1.39	1.62
WBGene00011911	ALG Class 26G	T22B3.3		0	0	4.16	3.92	4.53	0	0.06	0	0	0	0		0	0.06	0	0.07	0.1	0.28		0	0	0	1	0.81	0.47	0.09	0.2		0.71	1.31	1.22	2.1	0.55	3.24
WBGene00011918	ALG Class 26G	T22C1.8		0	0	3.33	5.06	4.35	0	0.06	0.06	0	0	0.15		0	0.06	0.06	0	0.1	0		0.41	0.18	0.5	2.5	1.83	0.24	0.83	0.5		1.95	2.57	2.7	3.66	2.59	1.42
WBGene00011919	ALG Class 26G	T22C1.9		0	0	0.77	1.21	0.99	0	0	0.06	0	0	0		0	0	0.06	0	0	0		0	0	0	0.25	0.2	0.24	0.18	0		0	0.25	0.13	0.25	0.37	0.2
WBGene00011951	ALG Class 26G	T23F6.3		0	0	3.01	5.2	5.11	0.07	0	0	0	0.21	0		0.07	0	0	0	0	0.21		0.28	0.27	0.13	1.5	3.46	0.35	0.92	0.3		3.71	3.72	4.17	5.71	3.14	4.65
WBGene00011954	ALG Class 26G	T23F11.2		0	0	2.05	3.24	3.29	0.04	0	0.03	0.06	0.05	0		0.04	0	0.03	0	0.02	0.07		0.07	0	0	1.08	0.83	0.1	0.12	0.05		0.71	1.16	1.19	1.15	1.57	0.91
WBGene00011968	ALG Class 26G	T23G11.1		0	0	6.21	6.69	7.43	0.14	0	0.06	0	0.11	0		0.14	0	0.06	0.28	0.1	0.21		0.14	0.27	0	4.25	4.28	1.18	0.55	0.81		2.83	3.82	3.21	4.71	4.8	4.25
WBGene00012010	ALG Class 26G	T25B9.4		0	0	5.54	7.26	7.54	0.04	0.09	0	0	0	0.15		0.04	0.09	0	0.04	0.12	0.03		0.07	0.27	0.06	3.75	4.23	1	0.69	1.06		3.27	2.42	2.47	3.56	2.22	3.24
WBGene00012012	ALG Class 26G	T25B9.6		0	0	3.97	5.77	6.9	0.07	0	0.06	0	0	0		0.07	0	0.06	0	0	0.41		0.14	0	0.25	2	2.14	0.24	0.18	1.01		2.3	1.71	2.5	2.71	0.92	1.82
WBGene00012087	ALG Class 26G	T27E7.1		0	0	6.79	11.96	9.46	0.14	0.3	0.23	0	0.21	0		0.14	0.3	0.23	0.28	0.38	1.1		0.41	0.98	0.38	4.25	6.52	0.95	0.64	1.31		3.36	5.54	5.71	6.16	7.76	5.26
WBGene00012094	ALG Class 26G	T27E9.2		0	0	0.19	0.07	0.52	0	0	0.06	0	0	0		0	0	0.06	0	0	0.07		0	0	0	0	0.1	0	0	0		0.18	0.05	0	0.1	0.37	0
WBGene00012102	ALG Class 26G	T27F6.1		0	0	0.32	0.2	0.93	0	0.12	0	0	0	0		0	0.12	0	0	0.02	0		0	0	0.13	0.88	0.41	0.12	0.09	0.05		0.35	0.25	0.59	0.71	0.55	0.4
WBGene00012120	ALG Class 26G	T28C6.5		0	0	6.08	6.98	5.69	0.14	0.06	0.06	0	0	0		0.14	0.06	0.06	0	0.05	0.07		0	0.09	0.13	1.25	1.12	0.35	0.18	0.3		1.95	1.16	1.6	2	1.29	1.62
WBGene00012138	ALG Class 26G	T28F4.3		0	0	10.24	9.47	10.27	0.28	0	0	0	0.11	0		0.28	0	0	0.14	0.14	0.28		0.14	0.27	0.25	5.25	4.28	1.54	1.1	1.51		1.24	1.11	1.16	2.05	1.66	1.42
WBGene00012156	ALG Class 26G	ebp-2, VW02B12L.3		0	0	1.41	0.64	1.39	0	0	0	0.35	0.11	0		0	0	0	0	0	0		0.14	0.09	0	0.75	0.81	0	0	0		0.71	0.65	0.51	0.65	0.37	0.81
WBGene00012169	ALG Class 26G	ttbk-4, W01B6.2		0	0	4.48	4.91	7.25	0	0	0.17	0	0.11	0		0	0	0.17	0	0.1	0.14		0.28	0	0	4.25	2.85	0.59	0.55	0.1		6.54	5.23	5.07	6.67	7.39	6.17
WBGene00012173	ALG Class 26G	W01B6.6		0	0	0.51	1.71	1.57	0	0	0	0	0	0		0	0	0	0	0	0.07		0	0	0	0.75	1.32	0.24	0.37	0.1		0.18	0.2	0.19	0.45	0.37	0.61
WBGene00012177	ALG Class 26G	decr-1.2, W01C9.4		0	0	0.58	0.28	1.62	0	0	0	0	0	0		0	0	0	0	0.05	0		0	0	0	0	0.1	0.06	0	0		0.62	0.2	0.06	0.18	0.09	0.51
WBGene00012180	ALG Class 26G	W01D2.3		0.02	0	1.6	1.99	2.73	0	0	0	0	0.11	0		0	0	0	0	0.05	0.07		0.03	0.03	0	1.75	1.22	0.35	0.37	0.2		1.95	1.12	1.03	1.79	2.08	0.4
WBGene00012191	ALG Class 26G	W02A2.8		0	0	5.44	6.12	6.85	0.14	0.06	0.12	0	0.11	0		0.14	0.06	0.12	0.14	0.24	0.28		0.14	0.18	0.25	1.75	2.44	0.35	1.1	0.91		6.28	4.43	4.11	5.41	5.82	4.25
WBGene00012207	ALG Class 26G	W02B12.12		0	0	1.22	1.71	1.94	0	0.06	0	0	0.21	0		0	0.06	0	0	0.05	0		0	0.04	0	0.25	0.41	0.24	0.09	0		0.53	0.48	0.39	1.1	0.37	0.81
WBGene00012208	ALG Class 26G	W02D9.2		0	0	0.13	0.93	0.99	0	0	0	0	0	0		0	0	0	0	0	0		0	0	0	0.25	0.31	0.24	0.09	0.2		0.35	0.65	0.19	0.35	0.37	1.01
WBGene00012219	ALG Class 26G	W03C9.1		0	0	1.54	4.63	3.6	0	0.06	0	0	0	0		0	0.06	0	0	0	0.07		0.14	0.18	0.13	2.5	2.34	0	0.09	0.3		3.36	2.57	2.37	3.51	2.22	3.84
WBGene00012223	ALG Class 26G	W03C9.8		0	0	2.37	3.06	3.6	0	0	0	0	0	0		0	0	0	0.07	0	0.07		0	0.27	0.13	2.75	2.14	0.59	0.46	0.3		2.65	1.91	1.99	2.51	0.55	3.03
WBGene00012249	ALG Class 26G	W04E12.4		0	0	1.02	2.88	2.73	0	0	0	0	0	0		0	0	0	0	0.05	0.14		0	0	0	1.25	0.41	0	0.09	0.1		1.24	0.5	0.48	0.78	0.37	1.11
WBGene00012294	ALG Class 26G	nspa-8, W06A7.5		0	0	1.44	3	2.35	0	0	0	0	0	0		0	0	0	0	0	0		0	0.02	0.13	1.13	0.86	0.17	0.41	0.64		0.06	0.53	0.31	0.26	0.84	0.51
WBGene00012296	ALG Class 26G	spe-46, W06D4.2		0	0	2.24	3.13	3.6	0.07	0.06	0	0	0.21	0		0.07	0.06	0	0	0.1	0		0	0.27	0.13	1.5	1.94	0.24	0.28	0.2		1.06	2.01	0.96	1.6	1.85	1.21
WBGene00012297	ALG Class 26G	W06D4.3		0	0	3.59	4.56	4.99	0.14	0	0.06	0	0	0		0.14	0	0.06	0	0.1	0.21		0.28	0.27	0.13	1.75	2.14	0.35	0.37	1.41		3.18	1.91	2.31	2.41	2.96	2.83
WBGene00012315	ALG Class 26G	immt-2, W06H3.1		0	0	1.02	1.07	3.13	0	0.06	0	0	0	0		0	0.06	0	0	0	0.07		0.14	0	0.13	0.25	0.51	0.35	0.09	0.3		0.18	0.15	0.39	0.45	0.37	0
WBGene00012345	ALG Class 26G	W08E3.4		0	0	5.83	6.91	8.06	0.07	0.12	0.12	0	0	0.15		0.07	0.12	0.12	0	0.1	0.21		0.14	0.36	0.13	3.25	4.48	0.95	1.1	1.21		9.37	8.15	7	9.47	6.84	7.89
WBGene00012357	ALG Class 26G	W09D6.4		0	0	2.88	3.7	4.53	0	0	0	0	0	0		0	0	0	0.11	0.05	0.38		0.07	0.36	0.19	4.88	4.74	1	1.01	1.11		2.03	2.01	2.31	3.03	2.68	3.64
WBGene00012379	ALG Class 26G	Y1A5A.1		0	0	2.62	2.78	2.52	0	0	0	0	0	0		0	0	0	0	0.1	0		0.14	0.09	0.13	1	0.31	0.35	0.09	0.4		1.77	1.61	2.05	1.8	2.22	1.82
WBGene00012401	ALG Class 26G	irld-57, Y6E2A.8		0	0	0.9	2.85	1.97	0	0	0	0	0	0		0	0	0	0	0.05	0		0	0.18	0	0.25	0.41	0.12	0.18	0.1		0.71	0.6	0.39	0.9	1.48	1.42
WBGene00012402	ALG Class 26G	sfxn-1.3, Y6E2A.9		0	0	4.35	7.69	7.02	0.07	0.06	0.06	0	0.11	0.15		0.07	0.06	0.06	0	0.05	0.28		0	0.18	0.38	6.75	5.3	0.71	0.83	1.31		3.54	4.68	5.52	5.96	6.47	6.87
WBGene00012486	ALG Class 26G	Y18D10A.21		0.07	0	4.23	5.48	6.15	0.21	0	0.12	0	0	0		0.21	0	0.12	0.07	0.1	0.28		0.41	0.27	0.13	4.5	7.03	0.83	1.01	1.21		4.42	3.72	4.3	6.41	6.1	3.64
WBGene00012595	ALG Class 26G	Y38E10A.17		0	0	1.54	2.21	3.02	0	0.06	0.12	0	0.11	0		0	0.06	0.12	0	0	0.28		0.14	0	0.25	3	1.83	0.12	0.09	0.4		3.89	3.27	3.53	3.71	4.25	4.65
WBGene00012605	ALG Class 26G	Y38F1A.1		0	0	21.51	27.49	25.06	0.49	0.18	0.23	0	0.32	0		0.49	0.18	0.23	0.21	0.81	1.24		0	0.53	0.63	5.25	7.74	2.95	2.02	2.83		5.48	8	7.38	9.77	6.47	8.9
WBGene00012608	ALG Class 26G	hphd-1, Y38F1A.6		0	0	0.7	1.07	0.58	0	0	0	0	0.11	0		0	0	0	0	0	0		0	0	0	0	0.1	0.35	0	0		0	0	0.06	0.05	0.37	0.4
WBGene00012627	ALG Class 26G	Y38H6C.15		0	0	8.32	9.19	11.43	0	0.06	0.06	0	0.21	0		0	0.06	0.06	0	0.05	0.07		0.14	0.09	0.38	4.5	2.14	0.71	0.28	1.11		2.65	2.47	2.63	3.97	3.14	3.84
WBGene00012636	ALG Class 26G	Y38H8A.2		0	0	0.58	1.42	1.68	0	0	0	0	0	0		0	0	0	0	0	0		0	0	0	0	0.31	0.12	0	0.1		0.35	0.1	0.19	0.45	0	0.61
WBGene00012637	ALG Class 26G	Y38H8A.3		0	0	2.43	2.47	3.75	0.02	0	0.06	0	0	0		0.02	0	0.06	0.02	0.03	0.07		0.14	0	0.17	0.5	0.75	0.2	0.15	0.24		0.65	0.41	0.73	1.08	0.62	0.47
WBGene00012638	ALG Class 26G	Y38H8A.4		0	0	0.51	0.78	1.1	0	0	0	0	0	0		0	0	0	0	0.05	0.14		0	0.09	0	0.75	0.81	0.24	0.09	0		0.35	0.55	0.45	0.25	0.55	0.4
WBGene00012642	ALG Class 26G	Y39A1A.2		0	0	1.34	1.78	1.45	0.07	0	0	0	0	0.02		0.07	0	0	0	0	0		0.16	0	0	0.75	0.14	0.24	0	0.1		1.59	0.81	0.65	1.26	1.32	1.01
WBGene00012660	ALG Class 26G	Y39A1A.24		0	0	1.47	1.5	1.86	0	0	0	0	0	0		0	0	0	0	0.05	0.07		0	0	0	0.25	0.31	0.12	0	0.3		1.24	0.6	0.71	0.75	1.29	0.81
WBGene00012711	ALG Class 26G	Y39E4A.1		0	0	6.43	10.36	8.99	0.07	0	0	0	0.11	0		0.07	0	0	0	0.19	0.21		0.28	0.09	0.25	1.75	2.65	1.06	0.64	0.91		1.41	1.21	1.8	1.45	1.29	1.42
WBGene00012712	ALG Class 26G	ttm-1, Y39E4A.2		0	0	0.13	0.5	0.41	0	0	0	0	0	0		0	0	0	0	0	0		0	0	0	0.5	0.51	0.12	0	0		0.35	0.3	0.96	0.65	0.55	0.61
WBGene00012713	ALG Class 26G	bckd-1A, Y39E4A.3		0	0	0.7	0.57	0.41	0	0	0	0	0	0		0	0	0	0	0	0		0	0	0	0.25	0.71	0.12	0	0.1		0.88	0.53	0.77	1.55	1.11	0.61
WBGene00012720	ALG Class 26G	Y39E4B.11		0	0	2.69	3.63	4.18	0	0	0	0	0.21	0		0	0	0	0	0.1	0.07		0.14	0	0.13	0.5	0.51	0.24	0.09	0.2		0.53	0.65	0.77	0.85	1.48	1.62
WBGene00012721	ALG Class 26G	Y39E4B.13		0	0	4.29	6.27	6.85	0	0	0	0	0	0		0	0	0	0	0.05	0		0.14	0.18	0.13	5.25	4.18	0.71	0.92	0.91		7.6	7.6	6.42	8.57	6.47	8.69
WBGene00012741	ALG Class 26G	Y40H4A.2		0	0	7.62	9.97	10.56	0.07	0.06	0	0	0.11	0		0.07	0.06	0	0	0.1	0.28		0.28	0.09	0.13	0.75	2.65	0.47	0.55	0.61		1.77	1.46	1.03	2.66	0.92	1.62
WBGene00012761	ALG Class 26G	Y41C4A.18		0	0	2.82	5.27	3.89	0.07	0.12	0	0	0	0		0.07	0.12	0	0	0.05	0.07		0.41	0.18	0.38	5.75	5.3	0.95	1.1	2.02		2.3	3.07	3.08	3.41	4.62	4.85
WBGene00012765	ALG Class 26G	Y41E3.7		0	0	0.38	1.14	1.57	0	0	0	0	0	0		0	0	0	0.07	0	0		0	0	0.13	0.75	0.41	0.12	0.37	0.1		0	0.2	0.13	0.65	0.55	0.81
WBGene00012766	ALG Class 26G	Y41E3.8		0	0	0.26	0.43	0.12	0	0	0	0	0	0		0	0	0	0	0	0		0	0	0	0	0	0	0	0		0	0	0.06	0.1	0	0
WBGene00012768	ALG Class 26G	eef-1B.2, Y41E3.10		0	0	0.42	0.61	0.49	0	0	0	0	0	0		0	0	0	0.14	0.05	0.07		0	0.04	0	0.88	0.66	0.24	0.23	0.35		0.8	0.45	0.26	0.3	1.11	0.4
WBGene00012781	ALG Class 26G	nspd-7, Y43C5A.1		0	0	8.96	14.38	11.14	0.07	0	0.12	0	0.11	0		0.07	0	0.12	0	0.19	0.14		0.14	0	0.13	3.5	4.07	0.59	0.28	0.1		1.41	0.96	0.98	0.85	0.74	1.21
WBGene00012784	ALG Class 26G	Y43C5A.4		0	0	1.02	1.78	1.45	0	0.06	0	0	0	0		0	0.06	0	0	0	0		0	0	0	1.75	1.32	0.35	0	0.71		0.88	1.61	1.35	1.8	2.22	0.4
WBGene00012786	ALG Class 26G	Y43C5B.3		0	0	1.09	1.85	1.97	0	0	0	0	0	0		0	0	0	0.07	0.05	0.07		0.14	0	0	2.5	1.53	0.35	0.64	0.61		0.88	1.16	1.16	1.75	0.74	1.01
WBGene00012809	ALG Class 26G	Y43F8A.2		0	0	5.63	6.91	9.4	0.28	0.06	0.12	0.17	0	0		0.28	0.06	0.12	0.14	0.14	0.41		0.14	0.09	0.13	5.25	3.46	0.47	0.64	0.61		7.6	8.51	8.86	9.72	8.69	9.5
WBGene00012827	ALG Class 26G	Y43F8C.5		0	0	4.29	5.23	5.31	0	0.06	0	0	0.11	0		0	0.06	0	0.07	0	0.07		0	0.27	0.06	1.75	3.67	0.24	0.51	0.3		1.24	2.49	2.63	3.21	1.94	3.03
WBGene00012831	ALG Class 26G	Y43F8C.9		0	0	2.05	2.6	1.83	0.07	0	0	0	0	0		0.07	0	0	0	0	0.07		0	0.09	0.06	5.25	2.34	0.95	0.51	0.5		1.95	0.93	0.77	2.03	0.65	1.01
WBGene00012855	ALG Class 26G	Y44A6D.5		0	0	1.41	2.49	3.37	0.07	0	0.06	0	0	0		0.07	0	0.06	0	0.19	0.07		0	0.09	0	1.75	0.81	0.12	0.46	0.2		0.53	0.96	1.28	1.35	1.11	0.61
WBGene00012859	ALG Class 26G	Y45F3A.1		0	0	0.9	0.57	0.35	0	0	0	0	0	0		0	0	0	0	0.05	0		0	0	0	0.75	0.2	0	0	0		0	0.15	0.13	0.2	0	0
WBGene00012871	ALG Class 26G	Y45F10B.3		0	0	14.2	16.65	16.84	0.11	0.03	0.26	0.09	0.26	0		0.11	0.03	0.26	0.18	0.29	0.55		0.76	0.27	0.06	4.75	6.75	1.83	1.42	1.26		2.65	2.21	2.21	3.21	2.68	3.13
WBGene00012905	ALG Class 26G	Y46G5A.14		0	0	0.64	0.93	0.67	0	0	0	0	0	0		0	0	0	0	0	0		0	0	0	0.75	1.32	0	0.28	0.2		1.06	0.6	0.32	0.65	0.92	0.4
WBGene00012912	ALG Class 26G	Y46G5A.22		0	0	2.18	4.2	3.89	0	0	0	0	0	0		0	0	0	0	0.05	0		0	0.09	0.13	0.5	0.81	0.24	0.28	0.5		0.71	1.36	1.28	1.65	1.29	0.81
WBGene00012925	ALG Class 26G	wht-8, Y47D3A.11		0	0	1.09	1.21	1.68	0	0	0	0	0.11	0		0	0	0	0	0.1	0		0	0.09	0	1.5	1.73	0.35	0.18	0.2		0.71	1.06	1.03	1.25	1.66	2.43
WBGene00012926	ALG Class 26G	Y47D3A.13		0	0	6.21	10.18	8.82	0.07	0	0	0	0.11	0		0.07	0	0	0.04	0.14	0.79		0.34	0.53	0.44	8.63	8.61	1.83	2.02	1.72		4.69	5.23	4.75	6.09	6.56	8.69
WBGene00012937	ALG Class 26G	Y47D3A.31		0	0	2.62	4.34	4.82	0.14	0	0	0	0	0.15		0.14	0	0	0	0.05	0.07		0.14	0.27	0.38	5.25	2.95	0.71	0.37	0.61		2.65	2.77	2.7	2.56	2.22	2.22
WBGene00012946	ALG Class 26G	Y47H9B.2		0	0	0.38	0.85	0.35	0	0	0	0	0	0		0	0	0	0	0	0		0	0	0	0.25	0.2	0.12	0.09	0.1		1.06	0.45	0.39	0.65	0.18	0.2
WBGene00012979	ALG Class 26G	Y48B6A.5		0	0	3.33	3.63	3.77	0	0.06	0.06	0	0	0		0	0.06	0.06	0	0	0		0.14	0.18	0.38	1	0.2	0.35	0.37	0.1		1.41	1.48	1.54	1.6	1.29	1.62
WBGene00013033	ALG Class 26G	Y49E10.10		0	0	16.39	21.93	18.63	0.14	0	0	0	0.11	0		0.14	0	0	0.07	0	0.48		0.55	0.18	0.38	9	6.01	2.13	2.02	1.82		8.49	6.94	6.42	7.87	10.16	9.1
WBGene00013038	ALG Class 26G	ani-1, Y49E10.19		0	0	0.13	0.28	0.46	0	0	0	0	0.11	0.15		0	0	0	0	0	0		0.14	0.18	0.13	0.5	0.2	0.12	0.09	0.2		0	0.05	0	0.1	0	0
WBGene00013052	ALG Class 26G	scrm-7, Y50E8A.9		0	0	1.54	3.63	2.03	0	0	0	0	0	0		0	0	0	0	0	0.07		0	0.09	0	1.25	1.02	0.24	0.09	0.4		1.24	0.6	1.06	1	1.29	0.2
WBGene00013053	ALG Class 26G	Y50E8A.10		0	0	2.05	3.35	1.62	0	0	0	0	0	0		0	0	0	0	0.1	0		0	0	0	0	0.61	0.12	0.55	0.2		3.18	2.77	3.08	2.66	3.7	2.22
WBGene00013068	ALG Class 26G	Y51A2B.4		0	0	0.45	1.21	0.41	0	0	0	0	0	0		0	0	0	0	0	0		0	0	0	0.75	1.22	0.24	0.18	0.2		0.35	0.6	0.64	0.55	1.11	0.81
WBGene00013085	ALG Class 26G	mpz-6, Y51B9A.3		0	0	2.72	3.56	3.68	0	0	0	0	0.05	0.15		0	0	0	0	0.05	0.07		0.07	0.04	0.25	1.38	0.56	0.18	0.32	0.15		1.15	1.26	0.96	1.43	1.66	1.72
WBGene00013121	ALG Class 26G	spe-38, Y52B11A.1		0	0	0.77	2.28	1.57	0	0	0	0	0	0		0	0	0	0	0	0		0.28	0.09	0.25	1.5	1.63	0.12	0.18	0.1		2.12	1.66	1.48	2.21	2.4	1.21
WBGene00013138	ALG Class 26G	Y53C10A.10		0.07	0	1.98	2.42	3.13	0	0.18	0	0	0	0		0	0.18	0	0.21	0.1	0.83		0	0.53	0.13	3.75	2.85	0.24	0.92	0.61		5.31	5.23	4.3	5.81	6.1	4.25
WBGene00013140	ALG Class 26G	mop-25.2, Y53C12A.4		0	0	0.26	0.14	0.23	0	0	0	0	0	0		0	0	0	0	0	0		0	0	0	0	0.1	0.12	0	0.1		0.35	0.25	0.32	0.2	0.55	0.2
WBGene00013142	ALG Class 26G	Y53C12A.7		0	0	1.73	1.14	1.16	0	0	0	0	0.11	0		0	0	0	0	0	0		0	0	0	0	0.31	0.24	0.09	0.1		0	0.2	0.39	0.55	0.37	1.01
WBGene00013148	ALG Class 26G	Y53F4A.2		0	0	0.38	0.28	0.52	0	0	0	0	0	0		0	0	0	0	0	0		0	0	0	0.75	0.2	0.12	0.37	0		0.71	0.5	0.19	0.3	0.55	0.61
WBGene00013175	ALG Class 26G	Y53F4B.36		0	0	0.77	0.21	1.1	0	0	0	0	0	0		0	0	0	0	0.05	0.07		0	0.09	0	0.25	0.92	0.35	0	0		0.71	0.3	0.77	0.75	1.29	0.2
WBGene00013192	ALG Class 26G	Y54E2A.7		0	0	1.73	1.71	2.15	0	0	0	0	0	0		0	0	0	0.07	0	0.14		0.28	0	0.25	0.25	1.02	0.24	0	0.2		0.18	0.7	0.58	1	0.37	1.42
WBGene00013198	ALG Class 26G	Y54E5A.2		0	0	0.19	0.78	1.33	0.07	0	0	0	0	0		0.07	0	0	0	0	0		0	0	0	1	0.61	0.12	0.09	0.1		0.18	0.3	0.32	0.45	0.37	0.4
WBGene00013237	ALG Class 26G	Y56A3A.19		0	0	0.26	0.14	0.58	0	0	0	0	0	0		0	0	0	0	0	0		0	0	0	0	0	0	0.09	0		0	0.05	0	0	0	0
WBGene00013238	ALG Class 26G	trap-4, Y56A3A.21		0	0	0.9	3.06	3.31	0	0	0	0	0	0		0	0	0	0	0	0		0.14	0	0	0.5	0.41	0.12	0.09	0.1		0.53	0.35	0.64	0.3	0	0.81
WBGene00013279	ALG Class 26G	Y57A10B.7		0	0	7.23	12.32	10.91	0.07	0.18	0.06	0	0.21	0.15		0.07	0.18	0.06	0	0.1	0.28		0.28	0.09	0.25	3.5	6.31	0.95	0.55	1.62		4.07	4.48	4.62	4.61	4.25	3.84
WBGene00013290	ALG Class 26G	Y57G11A.2		0	0	1.22	1.99	2.96	0.07	0.06	0	0	0.32	0		0.07	0.06	0	0.07	0.19	0.14		0.14	0.27	0.25	1.75	1.83	0.35	0.46	0.2		1.59	1.76	2.31	2.56	2.22	4.04
WBGene00013296	ALG Class 26G	Y57G11B.3		0	0	2.24	6.27	3.6	0	0.06	0.06	0	0	0		0	0.06	0.06	0	0.05	0.14		0.14	0	0.25	3.25	2.44	0.47	0.55	0.5		3.71	2.67	2.82	2.96	2.22	2.02
WBGene00013299	ALG Class 26G	irld-18, Y57G11B.7		0	0	1.57	1.46	1.71	0	0	0.12	0	0.21	0		0	0	0.12	0	0	0.07		0	0	0	1.63	0.56	0.12	0.09	0.3		0	0.58	0.83	0.68	1.39	0.91
WBGene00013304	ALG Class 26G	ptp-5.2, Y57G11C.6		0	0	2.75	3.49	4.7	0	0	0	0	0.11	0		0	0	0	0.07	0.1	0		0.14	0.09	0.25	1.75	1.83	0.47	0.28	0.2		2.48	1.76	1.86	2.08	3.14	1.62
WBGene00013306	ALG Class 26G	Y57G11C.8		0	0	0.38	0.82	0.93	0	0	0	0	0	0		0	0	0	0	0	0.03		0	0.09	0	0.5	0.71	0	0	0		0.88	0.7	0.74	0.8	1.02	1.62
WBGene00013307	ALG Class 26G	Y57G11C.9		0	0	0	0	0.06	0	0	0	0	0	0		0	0	0	0	0	0		0	0	0	0.25	0	0	0	0.1		0	0.1	0	0.05	0	0
WBGene00013308	ALG Class 26G	nuo-3, Y57G11C.12		0	0	0	0.28	0.29	0	0	0	0	0	0		0	0	0	0	0	0		0	0	0	0	0	0.12	0.09	0		0	0.1	0.13	0.1	0.74	0
WBGene00013310	ALG Class 26G	Y57G11C.14		0	0	1.28	3.28	2.73	0	0	0	0	0.21	0		0	0	0	0	0.05	0.21		0.14	0.36	0	1.75	1.63	0.47	0.18	0.5		1.41	0.96	1.09	0.95	1.48	1.21
WBGene00013311	ALG Class 26G	sec-61.A, Y57G11C.15		0	0	8.26	10.18	8.41	0	0.12	0	0	0.32	0		0	0.12	0	0	0.05	0.07		0.14	0	0	0.5	1.22	0.24	0.46	0.61		1.24	0.5	0.39	0.65	0.55	0.4
WBGene00013318	ALG Class 26G	Y57G11C.23		0	0	0	0.04	0.46	0	0	0	0	0	0		0	0	0	0	0	0		0	0	0	0.25	0.1	0	0	0.2		0.35	0.05	0.58	0.2	0	0.2
WBGene00013360	ALG Class 26G	tmed-4, Y60A3A.9		0	0	1.12	1.74	1.6	0	0	0	0	0.11	0		0	0	0	0	0	0.07		0	0	0	0.75	0.15	0.12	0	0		0.88	0.25	0.03	0.1	0.18	0
WBGene00013388	ALG Class 26G	Y62F5A.10		0	0	4.8	7.9	5.69	0.14	0	0	0	0.11	0		0.14	0	0	0	0	0		0.14	0.18	0	1.25	2.24	0.24	0.55	0.91		4.95	3.32	3.08	4.16	4.44	3.24
WBGene00013429	ALG Class 26G	Y66D12A.3		0	0	0.38	0.07	0.58	0	0	0	0	0.01	0		0	0	0	0.07	0	0		0	0	0	0.25	0.2	0.12	0	0.1		0.53	0.61	0.45	0.35	0.39	0.2
WBGene00013437	ALG Class 26G	Y66D12A.11		0	0	0.26	1.71	1.68	0	0	0	0	0	0		0	0	0	0	0	0		0	0	0	0.25	0.71	0.59	0.09	0.1		0.35	0.55	0.77	0.8	0.37	0.61
WBGene00013449	ALG Class 26G	Y67A6A.1		0	0	4.35	5.27	5.98	0	0.06	0	0	0	0		0	0.06	0	0	0.05	0		0	0.09	0	4.5	4.07	0.71	0.64	0.81		3.36	3.62	3.79	4.31	4.62	3.03
WBGene00013463	ALG Class 26G	kdp-1, Y67H2A.5		0	0	0.32	0.14	0.35	0	0	0	0	0	0		0	0	0	0	0	0		0	0	0	0.5	0	0	0	0		0	0.4	0.32	0.5	0.37	0.81
WBGene00013473	ALG Class 26G	Y69E1A.1		0	0	0.48	0.71	1.02	0	0	0	0	0	0		0	0	0	0	0.02	0.07		0	0.09	0.13	1	0.56	0.06	0.41	0.4		1.33	1.18	1.25	1.83	1.29	2.43
WBGene00013474	ALG Class 26G	Y69E1A.2		0	0	2.08	3.49	2.41	0	0	0	0	0	0		0	0	0	0.21	0.14	0.07		0	0.09	0	0.63	1.17	1.3	0.51	0.71		0.88	1.61	1.6	1.83	1.57	2.33
WBGene00013475	ALG Class 26G	Y69E1A.3		0	0	6.11	7.23	7.46	0.04	0.06	0.06	0	0	0		0.04	0.06	0.06	0.07	0.1	0.14		0.62	0.22	0.19	3.25	3.51	0.59	0.83	0.76		4.07	3.37	3.56	4.76	3.97	4.55
WBGene00013476	ALG Class 26G	Y69E1A.4		0	0	1.57	1.32	1.94	0	0	0	0	0	0		0	0	0	0	0	0		0.14	0	0	0.5	1.12	0.12	0.55	0.15		0.71	0.53	0.67	1.05	0.92	0.51
WBGene00013478	ALG Class 26G	Y69E1A.8		0	0	2.11	4.34	3.42	0.07	0	0.06	0	0	0		0.07	0	0.06	0.07	0.05	0		0.14	0	0	1.25	0.71	0.47	0.28	0		1.59	1.36	1.8	1.9	2.4	2.63
WBGene00013513	ALG Class 26G	Y71A12C.2		0	0	2.18	3.2	2.61	0	0	0	0	0	0		0	0	0	0	0	0		0	0	0	0	0.51	0	0	0		0	0	0.13	0.2	0.18	0.2
WBGene00013521	ALG Class 26G	Y73F8A.12		0	0	3.27	5.16	5.95	0.04	0.03	0.06	0	0.05	0		0.04	0.03	0.06	0	0.05	0.07		0.14	0.18	0	2.88	2.04	0.65	0.46	1.16		1.33	0.93	1.28	1.78	1.29	1.01
WBGene00013523	ALG Class 26G	Y73F8A.14		0	0	2.7	4.52	4.38	0.04	0.03	0.06	0	0.05	0		0.04	0.03	0.06	0.07	0.05	0.14		0.14	0.09	0.13	2.38	2.55	0.59	0.92	0.66		1.5	0.68	0.77	1.18	1.29	0.81
WBGene00013524	ALG Class 26G	Y73F8A.15		0	0	2.18	4.42	3.54	0	0.12	0	0	0	0		0	0.12	0	0	0	0.07		0.41	0.09	0	1.25	0.71	0.35	0.18	0.1		0.18	0.2	0.26	0.35	0.74	0.61
WBGene00013556	ALG Class 26G	Y75B8A.23		0	0	0.38	1.64	1.28	0	0	0	0.17	0	0		0	0	0	0	0.05	0.07		0.14	0	0	1	0.41	0	0.28	0.91		2.12	1.26	1.6	1.55	1.66	2.63
WBGene00013590	ALG Class 26G	Y81G3A.1		0	0	9.83	13.28	11.61	0	0.09	0.09	0	0.37	0.07		0	0.09	0.09	0	0.12	0.34		0.48	0.38	0.38	5.63	6.57	2.24	1.65	1.51		4.33	4.5	3.85	5.26	5.36	5.06
WBGene00013657	ALG Class 26G	Y105C5B.18		0	0	0.96	2.56	2.03	0	0.06	0	0	0	0		0	0.06	0	0	0	0.07		0	0.09	0	0.75	1.12	0.35	0.28	0.5		1.59	0.86	1.35	1.1	1.48	0.81
WBGene00013684	ALG Class 26G	Y105E8A.27		0	0	1.09	2.35	2.55	0	0	0	0.17	0	0		0	0	0	0	0.05	0		0	0.09	0.13	1.25	0.71	0.35	0.18	0		1.41	1.01	1.03	1.2	1.11	1.42
[truncated: 49,684 more rows]
