# Supplementary material for: A low-abundance class of Dicer-dependent siRNAs produced from a variety of features in C. elegans
Source: HighWire-hosted journal article supplement (doi:10.1101/gr.279083.124), 2024-12-01
Supplement: Supplemental_Table_S6.xlsx [file Supplemental_Table_S6.xlsx]

## Sheet: Table S6
Supplemental Table S6. Non-overlapping 23H-RNA clusters seperated by at least 1 kb.
Chromosome	Start	End	Identifier	Overlap with ARL	Overlap with EER
I	14833	15866	ID=I:14833-15866	False	True
I	30839	30864	ID=I:30839-30864	False	False
I	46409	46605	ID=I:46409-46605	False	False
I	51453	52212	ID=I:51453-52212	False	False
I	54808	55003	ID=I:54808-55003	False	False
I	70551	70573	ID=I:70551-70573	False	True
I	83710	83881	ID=I:83710-83881	False	False
I	115147	115345	ID=I:115147-115345	False	False
I	127045	127070	ID=I:127045-127070	False	False
I	131963	131986	ID=I:131963-131986	False	False
I	188183	188244	ID=I:188183-188244	False	False
I	192492	192515	ID=I:192492-192515	False	False
I	214100	214122	ID=I:214100-214122	False	False
I	259770	259947	ID=I:259770-259947	False	False
I	290178	290201	ID=I:290178-290201	False	False
I	294662	294805	ID=I:294662-294805	False	False
I	315754	316011	ID=I:315754-316011	False	False
I	318467	318491	ID=I:318467-318491	False	True
I	338648	341061	ID=I:338648-341061	False	False
I	344566	344591	ID=I:344566-344591	False	False
I	352457	352481	ID=I:352457-352481	False	False
I	359839	359865	ID=I:359839-359865	False	False
I	367984	368006	ID=I:367984-368006	False	False
I	389906	389961	ID=I:389906-389961	False	False
I	427358	427381	ID=I:427358-427381	False	False
I	432174	432196	ID=I:432174-432196	True	False
I	442879	442910	ID=I:442879-442910	False	False
I	447412	447571	ID=I:447412-447571	False	False
I	449794	449882	ID=I:449794-449882	False	False
I	454208	454230	ID=I:454208-454230	False	True
I	464138	464163	ID=I:464138-464163	False	False
I	472277	472299	ID=I:472277-472299	False	False
I	487202	487251	ID=I:487202-487251	False	False
I	496970	497323	ID=I:496970-497323	False	False
I	501014	501143	ID=I:501014-501143	False	False
I	502191	502674	ID=I:502191-502674	False	False
I	514641	514664	ID=I:514641-514664	False	True
I	522277	522303	ID=I:522277-522303	False	False
I	525375	525406	ID=I:525375-525406	False	False
I	533338	533549	ID=I:533338-533549	False	False
I	551226	551611	ID=I:551226-551611	False	False
I	564385	564407	ID=I:564385-564407	False	False
I	568122	568148	ID=I:568122-568148	False	False
I	591180	591209	ID=I:591180-591209	False	False
I	596955	597292	ID=I:596955-597292	False	False
I	607116	607144	ID=I:607116-607144	False	False
I	613594	615065	ID=I:613594-615065	False	False
I	616180	616962	ID=I:616180-616962	False	False
I	622805	622828	ID=I:622805-622828	False	True
I	629668	630292	ID=I:629668-630292	True	True
I	633384	633412	ID=I:633384-633412	False	True
I	638999	639027	ID=I:638999-639027	False	False
I	640605	640628	ID=I:640605-640628	False	False
I	642561	642588	ID=I:642561-642588	False	False
I	644682	645304	ID=I:644682-645304	False	False
I	651735	651764	ID=I:651735-651764	False	False
I	652839	653602	ID=I:652839-653602	False	False
I	655380	655405	ID=I:655380-655405	False	False
I	659884	659908	ID=I:659884-659908	False	True
I	662239	662263	ID=I:662239-662263	False	False
I	666310	666339	ID=I:666310-666339	False	False
I	676552	676777	ID=I:676552-676777	True	False
I	678800	679747	ID=I:678800-679747	True	False
I	694797	694822	ID=I:694797-694822	False	False
I	702022	702126	ID=I:702022-702126	False	False
I	704178	704209	ID=I:704178-704209	False	False
I	705317	705339	ID=I:705317-705339	False	False
I	707205	707229	ID=I:707205-707229	False	True
I	724781	724975	ID=I:724781-724975	False	False
I	730751	730775	ID=I:730751-730775	False	False
I	738109	738565	ID=I:738109-738565	False	False
I	743699	743724	ID=I:743699-743724	False	False
I	745021	745047	ID=I:745021-745047	False	False
I	750347	750369	ID=I:750347-750369	False	False
I	753995	754321	ID=I:753995-754321	False	False
I	756201	756226	ID=I:756201-756226	False	False
I	759980	760002	ID=I:759980-760002	False	False
I	771720	771742	ID=I:771720-771742	False	False
I	773580	773606	ID=I:773580-773606	False	False
I	779666	779693	ID=I:779666-779693	False	False
I	781886	782363	ID=I:781886-782363	False	False
I	788666	788750	ID=I:788666-788750	False	False
I	793342	793365	ID=I:793342-793365	False	False
I	799230	799667	ID=I:799230-799667	False	False
I	821296	821327	ID=I:821296-821327	False	False
I	823422	823453	ID=I:823422-823453	False	False
I	825120	825149	ID=I:825120-825149	False	False
I	830567	830696	ID=I:830567-830696	False	False
I	839175	839203	ID=I:839175-839203	False	False
I	844457	844482	ID=I:844457-844482	False	False
I	847118	847144	ID=I:847118-847144	False	False
I	855834	855857	ID=I:855834-855857	False	True
I	859650	860087	ID=I:859650-860087	False	True
I	869518	869955	ID=I:869518-869955	False	True
I	874583	874605	ID=I:874583-874605	False	False
I	877971	878002	ID=I:877971-878002	False	False
I	883556	883581	ID=I:883556-883581	False	False
I	888525	888551	ID=I:888525-888551	False	False
I	902031	902054	ID=I:902031-902054	False	True
I	904880	905638	ID=I:904880-905638	False	True
I	907153	907175	ID=I:907153-907175	False	False
I	911241	912099	ID=I:911241-912099	False	False
I	922198	922391	ID=I:922198-922391	False	False
I	925722	925745	ID=I:925722-925745	False	False
I	937022	938139	ID=I:937022-938139	False	False
I	941859	941881	ID=I:941859-941881	False	False
I	947813	948305	ID=I:947813-948305	False	False
I	949712	949738	ID=I:949712-949738	False	False
I	951523	951546	ID=I:951523-951546	False	False
I	967176	967257	ID=I:967176-967257	False	False
I	1003545	1003568	ID=I:1003545-1003568	False	False
I	1012093	1012117	ID=I:1012093-1012117	False	False
I	1015935	1015966	ID=I:1015935-1015966	False	False
I	1018412	1018438	ID=I:1018412-1018438	False	False
I	1025372	1026132	ID=I:1025372-1026132	False	True
I	1038883	1038905	ID=I:1038883-1038905	False	False
I	1048828	1048854	ID=I:1048828-1048854	False	False
I	1050849	1052516	ID=I:1050849-1052516	False	False
I	1053969	1054660	ID=I:1053969-1054660	False	False
I	1062867	1065658	ID=I:1062867-1065658	False	True
I	1071088	1072226	ID=I:1071088-1072226	False	False
I	1073549	1073575	ID=I:1073549-1073575	False	False
I	1090375	1090397	ID=I:1090375-1090397	False	False
I	1127432	1127461	ID=I:1127432-1127461	False	False
I	1129597	1129626	ID=I:1129597-1129626	False	False
I	1132571	1132597	ID=I:1132571-1132597	False	False
I	1137368	1137399	ID=I:1137368-1137399	False	False
I	1139393	1139539	ID=I:1139393-1139539	False	True
I	1140672	1140697	ID=I:1140672-1140697	False	False
I	1148271	1148294	ID=I:1148271-1148294	False	True
I	1151260	1152020	ID=I:1151260-1152020	False	True
I	1154886	1154922	ID=I:1154886-1154922	False	True
I	1160982	1161431	ID=I:1160982-1161431	False	True
I	1168122	1168885	ID=I:1168122-1168885	False	True
I	1177213	1177353	ID=I:1177213-1177353	False	True
I	1178528	1178553	ID=I:1178528-1178553	False	False
I	1179627	1179777	ID=I:1179627-1179777	False	True
I	1185643	1185665	ID=I:1185643-1185665	False	False
I	1194649	1194876	ID=I:1194649-1194876	False	False
I	1198056	1198201	ID=I:1198056-1198201	False	True
I	1206504	1206955	ID=I:1206504-1206955	False	False
I	1211158	1211184	ID=I:1211158-1211184	False	False
I	1214733	1214759	ID=I:1214733-1214759	False	False
I	1216215	1216910	ID=I:1216215-1216910	False	True
I	1218055	1218828	ID=I:1218055-1218828	False	False
I	1224497	1225024	ID=I:1224497-1225024	False	False
I	1226470	1227236	ID=I:1226470-1227236	False	False
I	1228628	1228676	ID=I:1228628-1228676	False	False
I	1231532	1231554	ID=I:1231532-1231554	False	False
I	1233334	1233359	ID=I:1233334-1233359	False	False
I	1244170	1244832	ID=I:1244170-1244832	False	True
I	1245836	1245869	ID=I:1245836-1245869	False	True
I	1248591	1249814	ID=I:1248591-1249814	False	True
I	1252752	1252955	ID=I:1252752-1252955	False	False
I	1255774	1255805	ID=I:1255774-1255805	False	False
I	1259122	1259145	ID=I:1259122-1259145	False	True
I	1263563	1265838	ID=I:1263563-1265838	False	False
I	1268428	1268457	ID=I:1268428-1268457	False	False
I	1269552	1269576	ID=I:1269552-1269576	False	False
I	1272352	1272377	ID=I:1272352-1272377	False	False
I	1281714	1282622	ID=I:1281714-1282622	False	False
I	1289255	1290221	ID=I:1289255-1290221	False	False
I	1305118	1306253	ID=I:1305118-1306253	False	False
I	1310757	1310785	ID=I:1310757-1310785	False	False
I	1314542	1314573	ID=I:1314542-1314573	False	False
I	1319694	1319725	ID=I:1319694-1319725	False	False
I	1321228	1321639	ID=I:1321228-1321639	False	False
I	1324285	1324316	ID=I:1324285-1324316	False	False
I	1342931	1342953	ID=I:1342931-1342953	False	False
I	1345052	1345083	ID=I:1345052-1345083	False	True
I	1348077	1348113	ID=I:1348077-1348113	False	True
I	1352063	1352407	ID=I:1352063-1352407	False	False
I	1362057	1362196	ID=I:1362057-1362196	False	True
I	1364062	1364084	ID=I:1364062-1364084	False	False
I	1369040	1369484	ID=I:1369040-1369484	False	True
I	1370512	1370536	ID=I:1370512-1370536	False	True
I	1376211	1376971	ID=I:1376211-1376971	False	True
I	1380633	1380656	ID=I:1380633-1380656	False	False
I	1386690	1387577	ID=I:1386690-1387577	False	True
I	1388740	1388884	ID=I:1388740-1388884	False	True
I	1399568	1400566	ID=I:1399568-1400566	False	True
I	1403989	1404658	ID=I:1403989-1404658	False	False
I	1406646	1406772	ID=I:1406646-1406772	False	False
I	1408129	1408160	ID=I:1408129-1408160	False	False
I	1409649	1409754	ID=I:1409649-1409754	False	False
I	1418424	1420143	ID=I:1418424-1420143	False	True
I	1422449	1422471	ID=I:1422449-1422471	False	True
I	1425639	1425770	ID=I:1425639-1425770	False	False
I	1426890	1426915	ID=I:1426890-1426915	False	False
I	1438043	1438068	ID=I:1438043-1438068	False	True
I	1440102	1440254	ID=I:1440102-1440254	False	False
I	1447673	1447695	ID=I:1447673-1447695	False	False
I	1450904	1450933	ID=I:1450904-1450933	False	False
I	1456022	1456053	ID=I:1456022-1456053	False	False
I	1463844	1463870	ID=I:1463844-1463870	False	False
I	1477305	1477327	ID=I:1477305-1477327	False	False
I	1482686	1482710	ID=I:1482686-1482710	False	False
I	1486371	1486402	ID=I:1486371-1486402	False	False
I	1491779	1491804	ID=I:1491779-1491804	False	False
I	1494003	1494456	ID=I:1494003-1494456	False	True
I	1497580	1497646	ID=I:1497580-1497646	False	False
I	1503365	1503388	ID=I:1503365-1503388	False	True
I	1508620	1508885	ID=I:1508620-1508885	False	True
I	1521686	1522135	ID=I:1521686-1522135	False	True
I	1526366	1526391	ID=I:1526366-1526391	False	False
I	1531713	1531735	ID=I:1531713-1531735	False	False
I	1536685	1536710	ID=I:1536685-1536710	False	True
I	1538609	1538634	ID=I:1538609-1538634	False	False
I	1541952	1542157	ID=I:1541952-1542157	False	True
I	1544135	1544157	ID=I:1544135-1544157	False	False
I	1548713	1548741	ID=I:1548713-1548741	False	False
I	1554216	1555497	ID=I:1554216-1555497	False	True
I	1564306	1564642	ID=I:1564306-1564642	False	False
I	1567141	1567166	ID=I:1567141-1567166	False	False
I	1569804	1570257	ID=I:1569804-1570257	False	True
I	1571438	1571461	ID=I:1571438-1571461	False	True
I	1573486	1573510	ID=I:1573486-1573510	False	False
I	1574541	1574569	ID=I:1574541-1574569	False	False
I	1578380	1578403	ID=I:1578380-1578403	False	True
I	1582536	1582560	ID=I:1582536-1582560	False	False
I	1590111	1590192	ID=I:1590111-1590192	False	False
I	1592952	1593038	ID=I:1592952-1593038	False	False
I	1594424	1594573	ID=I:1594424-1594573	False	False
I	1613918	1614679	ID=I:1613918-1614679	False	True
I	1623589	1624097	ID=I:1623589-1624097	False	False
I	1625170	1627503	ID=I:1625170-1627503	False	False
I	1632826	1632857	ID=I:1632826-1632857	False	False
I	1633870	1633900	ID=I:1633870-1633900	False	False
I	1643606	1643630	ID=I:1643606-1643630	False	False
I	1646576	1647687	ID=I:1646576-1647687	False	True
I	1664827	1664984	ID=I:1664827-1664984	False	False
I	1673326	1673543	ID=I:1673326-1673543	False	False
I	1675510	1675536	ID=I:1675510-1675536	False	False
I	1679567	1679690	ID=I:1679567-1679690	False	False
I	1682150	1682176	ID=I:1682150-1682176	False	False
I	1685570	1685594	ID=I:1685570-1685594	False	False
I	1686779	1687015	ID=I:1686779-1687015	False	False
I	1698839	1699571	ID=I:1698839-1699571	False	False
I	1711643	1711668	ID=I:1711643-1711668	False	False
I	1716879	1716902	ID=I:1716879-1716902	False	False
I	1720237	1721054	ID=I:1720237-1721054	False	False
I	1732024	1732053	ID=I:1732024-1732053	False	False
I	1739633	1739657	ID=I:1739633-1739657	False	False
I	1741060	1741163	ID=I:1741060-1741163	False	False
I	1743163	1743194	ID=I:1743163-1743194	False	False
I	1773780	1774893	ID=I:1773780-1774893	False	True
I	1777993	1778024	ID=I:1777993-1778024	False	False
I	1779211	1779240	ID=I:1779211-1779240	False	False
I	1780510	1780536	ID=I:1780510-1780536	False	False
I	1790299	1790323	ID=I:1790299-1790323	False	False
I	1792271	1792300	ID=I:1792271-1792300	False	False
I	1794156	1794179	ID=I:1794156-1794179	False	False
I	1818935	1818957	ID=I:1818935-1818957	False	False
I	1821714	1821738	ID=I:1821714-1821738	False	False
I	1826050	1826271	ID=I:1826050-1826271	False	False
I	1837818	1837842	ID=I:1837818-1837842	False	False
I	1844041	1844072	ID=I:1844041-1844072	False	False
I	1846264	1846286	ID=I:1846264-1846286	False	False
I	1848673	1848701	ID=I:1848673-1848701	False	False
I	1863423	1863447	ID=I:1863423-1863447	False	True
I	1877243	1878753	ID=I:1877243-1878753	False	True
I	1883860	1883891	ID=I:1883860-1883891	False	False
I	1891876	1891907	ID=I:1891876-1891907	False	False
I	1898555	1898578	ID=I:1898555-1898578	False	True
I	1904156	1904263	ID=I:1904156-1904263	False	False
I	1907323	1907346	ID=I:1907323-1907346	False	False
I	1911047	1911078	ID=I:1911047-1911078	False	False
I	1912823	1913025	ID=I:1912823-1913025	True	True
I	1915426	1916850	ID=I:1915426-1916850	False	False
I	1930942	1932680	ID=I:1930942-1932680	False	True
I	1934010	1934409	ID=I:1934010-1934409	False	False
I	1940924	1940950	ID=I:1940924-1940950	False	False
I	1945340	1945934	ID=I:1945340-1945934	False	False
I	1948215	1948237	ID=I:1948215-1948237	False	False
I	1962877	1962901	ID=I:1962877-1962901	False	False
I	1964500	1964525	ID=I:1964500-1964525	False	True
I	1968706	1969372	ID=I:1968706-1969372	False	True
I	1970944	1971700	ID=I:1970944-1971700	False	False
I	1973981	1974009	ID=I:1973981-1974009	False	False
I	1982821	1982846	ID=I:1982821-1982846	False	False
I	1988009	1988040	ID=I:1988009-1988040	False	False
I	1989166	1989191	ID=I:1989166-1989191	False	False
I	1993899	1993967	ID=I:1993899-1993967	False	False
I	2001590	2001612	ID=I:2001590-2001612	False	False
I	2002718	2003458	ID=I:2002718-2003458	False	True
I	2004630	2007744	ID=I:2004630-2007744	False	False
I	2008839	2009812	ID=I:2008839-2009812	False	True
I	2011711	2011837	ID=I:2011711-2011837	False	False
I	2032320	2032346	ID=I:2032320-2032346	False	False
I	2033481	2034052	ID=I:2033481-2034052	False	True
I	2067535	2067563	ID=I:2067535-2067563	False	False
I	2079566	2079597	ID=I:2079566-2079597	False	False
I	2085964	2086171	ID=I:2085964-2086171	False	False
I	2088088	2088838	ID=I:2088088-2088838	False	False
I	2091000	2091029	ID=I:2091000-2091029	False	False
I	2092543	2093999	ID=I:2092543-2093999	False	False
I	2096566	2096589	ID=I:2096566-2096589	False	False
I	2103562	2103585	ID=I:2103562-2103585	False	True
I	2111286	2111308	ID=I:2111286-2111308	False	False
I	2117537	2117565	ID=I:2117537-2117565	False	False
I	2120343	2121328	ID=I:2120343-2121328	False	True
I	2129026	2130175	ID=I:2129026-2130175	False	False
I	2136950	2136973	ID=I:2136950-2136973	False	False
I	2138279	2138302	ID=I:2138279-2138302	False	False
I	2149933	2150863	ID=I:2149933-2150863	False	False
I	2155230	2155252	ID=I:2155230-2155252	False	False
I	2162365	2162388	ID=I:2162365-2162388	False	False
I	2170455	2170484	ID=I:2170455-2170484	False	False
I	2171886	2171908	ID=I:2171886-2171908	False	False
I	2175595	2175618	ID=I:2175595-2175618	True	True
I	2183877	2183906	ID=I:2183877-2183906	False	False
I	2267576	2267605	ID=I:2267576-2267605	False	False
I	2272358	2272379	ID=I:2272358-2272379	False	False
I	2279042	2279166	ID=I:2279042-2279166	False	False
I	2282115	2282137	ID=I:2282115-2282137	False	False
I	2296158	2296958	ID=I:2296158-2296958	False	True
I	2322677	2323340	ID=I:2322677-2323340	False	False
I	2325017	2325041	ID=I:2325017-2325041	False	False
I	2328418	2328449	ID=I:2328418-2328449	False	False
I	2339852	2339875	ID=I:2339852-2339875	False	False
I	2342001	2342026	ID=I:2342001-2342026	False	False
I	2360376	2361274	ID=I:2360376-2361274	False	False
I	2373576	2373598	ID=I:2373576-2373598	False	False
I	2376346	2377897	ID=I:2376346-2377897	False	False
I	2383088	2383119	ID=I:2383088-2383119	False	False
I	2385254	2385276	ID=I:2385254-2385276	False	False
I	2386779	2386956	ID=I:2386779-2386956	False	True
I	2391333	2391362	ID=I:2391333-2391362	False	False
I	2408540	2408563	ID=I:2408540-2408563	False	True
I	2413832	2414037	ID=I:2413832-2414037	False	False
I	2417855	2417879	ID=I:2417855-2417879	False	False
I	2425698	2425723	ID=I:2425698-2425723	False	False
I	2444473	2444590	ID=I:2444473-2444590	False	False
I	2453569	2453593	ID=I:2453569-2453593	False	False
I	2465763	2465786	ID=I:2465763-2465786	False	False
I	2477861	2477885	ID=I:2477861-2477885	False	True
I	2478930	2478954	ID=I:2478930-2478954	False	False
I	2481092	2481114	ID=I:2481092-2481114	False	True
I	2488920	2489044	ID=I:2488920-2489044	True	True
I	2493496	2493525	ID=I:2493496-2493525	False	False
I	2508616	2508652	ID=I:2508616-2508652	False	False
I	2513006	2513129	ID=I:2513006-2513129	False	False
I	2526684	2527033	ID=I:2526684-2527033	False	False
I	2579693	2580626	ID=I:2579693-2580626	False	True
I	2585622	2585646	ID=I:2585622-2585646	False	True
I	2586905	2588148	ID=I:2586905-2588148	False	True
I	2591313	2591341	ID=I:2591313-2591341	False	False
I	2598933	2598961	ID=I:2598933-2598961	False	False
I	2619643	2619889	ID=I:2619643-2619889	False	False
I	2643936	2643959	ID=I:2643936-2643959	False	False
I	2688637	2688661	ID=I:2688637-2688661	False	False
I	2711976	2712002	ID=I:2711976-2712002	False	False
I	2715370	2715423	ID=I:2715370-2715423	False	False
I	2729370	2729438	ID=I:2729370-2729438	False	True
I	2734077	2734102	ID=I:2734077-2734102	False	True
I	2736337	2736980	ID=I:2736337-2736980	False	False
I	2760196	2760250	ID=I:2760196-2760250	False	False
I	2761639	2761663	ID=I:2761639-2761663	False	False
I	2764984	2765007	ID=I:2764984-2765007	False	False
I	2767889	2767913	ID=I:2767889-2767913	False	False
I	2769419	2769580	ID=I:2769419-2769580	False	False
I	2773042	2773496	ID=I:2773042-2773496	False	True
I	2777625	2778406	ID=I:2777625-2778406	False	False
I	2782008	2782034	ID=I:2782008-2782034	False	False
I	2826623	2826652	ID=I:2826623-2826652	False	False
I	2832494	2832659	ID=I:2832494-2832659	False	False
I	2834872	2835616	ID=I:2834872-2835616	False	False
I	2859142	2859166	ID=I:2859142-2859166	False	False
I	2866080	2866106	ID=I:2866080-2866106	False	False
I	2867662	2867688	ID=I:2867662-2867688	False	False
I	2902593	2902615	ID=I:2902593-2902615	False	False
I	2904530	2904598	ID=I:2904530-2904598	False	False
I	2916392	2916614	ID=I:2916392-2916614	False	False
I	2918206	2918231	ID=I:2918206-2918231	False	False
I	2923467	2923490	ID=I:2923467-2923490	False	False
I	2926110	2926178	ID=I:2926110-2926178	False	False
I	2927293	2927387	ID=I:2927293-2927387	True	True
I	2930695	2930843	ID=I:2930695-2930843	False	True
I	2942473	2942498	ID=I:2942473-2942498	False	False
I	2944767	2945087	ID=I:2944767-2945087	False	False
I	2949216	2949240	ID=I:2949216-2949240	False	False
I	2989377	2989402	ID=I:2989377-2989402	False	True
I	2991174	2991949	ID=I:2991174-2991949	False	True
I	2998650	2998673	ID=I:2998650-2998673	False	False
I	3002172	3003346	ID=I:3002172-3003346	False	True
I	3007228	3007251	ID=I:3007228-3007251	False	True
I	3016716	3017402	ID=I:3016716-3017402	False	True
I	3027131	3027334	ID=I:3027131-3027334	False	False
I	3034191	3034336	ID=I:3034191-3034336	True	True
I	3040009	3040032	ID=I:3040009-3040032	False	False
I	3041108	3041136	ID=I:3041108-3041136	False	False
I	3052420	3052585	ID=I:3052420-3052585	False	False
I	3061035	3061059	ID=I:3061035-3061059	False	False
I	3066222	3066244	ID=I:3066222-3066244	False	False
I	3081438	3081463	ID=I:3081438-3081463	False	True
I	3086373	3086397	ID=I:3086373-3086397	False	True
I	3118240	3118265	ID=I:3118240-3118265	False	False
I	3136556	3136579	ID=I:3136556-3136579	False	False
I	3140967	3140996	ID=I:3140967-3140996	False	False
I	3142563	3143523	ID=I:3142563-3143523	False	False
I	3156882	3157011	ID=I:3156882-3157011	False	False
I	3171646	3171669	ID=I:3171646-3171669	False	False
I	3172879	3172908	ID=I:3172879-3172908	False	False
I	3174105	3174294	ID=I:3174105-3174294	False	True
I	3183559	3183688	ID=I:3183559-3183688	False	False
I	3197105	3197244	ID=I:3197105-3197244	False	False
I	3205389	3205413	ID=I:3205389-3205413	False	False
I	3207069	3207094	ID=I:3207069-3207094	False	True
I	3210001	3210030	ID=I:3210001-3210030	False	False
I	3213375	3213464	ID=I:3213375-3213464	False	False
I	3229105	3229201	ID=I:3229105-3229201	False	True
I	3250111	3250134	ID=I:3250111-3250134	False	False
I	3253553	3253577	ID=I:3253553-3253577	False	False
I	3254579	3255297	ID=I:3254579-3255297	False	True
I	3262887	3263733	ID=I:3262887-3263733	False	False
I	3277027	3277208	ID=I:3277027-3277208	False	False
I	3286824	3286849	ID=I:3286824-3286849	False	False
I	3288143	3288169	ID=I:3288143-3288169	False	False
I	3304394	3304418	ID=I:3304394-3304418	False	False
I	3317291	3317314	ID=I:3317291-3317314	False	False
I	3331444	3331468	ID=I:3331444-3331468	False	True
I	3335165	3335219	ID=I:3335165-3335219	False	False
I	3336907	3337842	ID=I:3336907-3337842	False	False
I	3349194	3349216	ID=I:3349194-3349216	True	True
I	3350942	3350966	ID=I:3350942-3350966	False	False
I	3363143	3363169	ID=I:3363143-3363169	False	False
I	3372318	3372343	ID=I:3372318-3372343	False	False
I	3376121	3376147	ID=I:3376121-3376147	False	False
I	3411154	3411177	ID=I:3411154-3411177	False	True
I	3413972	3413997	ID=I:3413972-3413997	False	True
I	3417221	3417730	ID=I:3417221-3417730	False	False
I	3431379	3431403	ID=I:3431379-3431403	False	False
I	3434471	3434574	ID=I:3434471-3434574	False	False
I	3440454	3440480	ID=I:3440454-3440480	False	False
I	3450218	3450243	ID=I:3450218-3450243	False	True
I	3453519	3453541	ID=I:3453519-3453541	False	False
I	3456821	3456846	ID=I:3456821-3456846	False	False
I	3468173	3468196	ID=I:3468173-3468196	False	True
I	3484723	3484993	ID=I:3484723-3484993	False	False
I	3495943	3495965	ID=I:3495943-3495965	False	False
I	3505601	3505774	ID=I:3505601-3505774	False	False
I	3507561	3507752	ID=I:3507561-3507752	False	True
I	3510899	3511099	ID=I:3510899-3511099	False	True
I	3515102	3515124	ID=I:3515102-3515124	True	True
I	3540239	3540857	ID=I:3540239-3540857	False	False
I	3562396	3562419	ID=I:3562396-3562419	False	False
I	3586125	3586146	ID=I:3586125-3586146	False	False
I	3591654	3591676	ID=I:3591654-3591676	True	False
I	3598184	3598385	ID=I:3598184-3598385	False	True
I	3601739	3601765	ID=I:3601739-3601765	False	False
I	3611220	3611244	ID=I:3611220-3611244	False	True
I	3619953	3619977	ID=I:3619953-3619977	False	False
I	3632122	3632183	ID=I:3632122-3632183	False	False
I	3644091	3644846	ID=I:3644091-3644846	False	True
I	3681302	3681327	ID=I:3681302-3681327	False	True
I	3682396	3682420	ID=I:3682396-3682420	False	True
I	3707538	3707564	ID=I:3707538-3707564	False	False
I	3746149	3747190	ID=I:3746149-3747190	False	False
I	3778427	3778456	ID=I:3778427-3778456	False	False
I	3794131	3794155	ID=I:3794131-3794155	False	False
I	3807086	3807110	ID=I:3807086-3807110	False	False
I	3834842	3834865	ID=I:3834842-3834865	False	False
I	3866744	3866996	ID=I:3866744-3866996	False	False
I	3870235	3871728	ID=I:3870235-3871728	False	False
I	3885256	3885281	ID=I:3885256-3885281	False	False
I	3888727	3888752	ID=I:3888727-3888752	False	True
I	3907492	3907518	ID=I:3907492-3907518	False	False
I	4135501	4135698	ID=I:4135501-4135698	False	False
I	4375287	4375528	ID=I:4375287-4375528	False	False
I	4377134	4377159	ID=I:4377134-4377159	False	False
I	4382234	4382439	ID=I:4382234-4382439	False	False
I	4385384	4385611	ID=I:4385384-4385611	False	False
I	4465556	4465578	ID=I:4465556-4465578	False	False
I	4504125	4504919	ID=I:4504125-4504919	False	False
I	4537152	4537380	ID=I:4537152-4537380	False	False
I	4610887	4610911	ID=I:4610887-4610911	False	False
I	4683683	4683706	ID=I:4683683-4683706	False	False
I	4703735	4703970	ID=I:4703735-4703970	False	False
I	4706080	4706104	ID=I:4706080-4706104	False	False
I	4734446	4734469	ID=I:4734446-4734469	False	False
I	4765746	4765805	ID=I:4765746-4765805	False	False
I	4782111	4782134	ID=I:4782111-4782134	False	False
I	4785703	4785725	ID=I:4785703-4785725	False	False
I	5080676	5080700	ID=I:5080676-5080700	False	False
I	5122326	5122440	ID=I:5122326-5122440	False	False
I	5504158	5504180	ID=I:5504158-5504180	False	False
I	5536263	5536292	ID=I:5536263-5536292	False	False
I	5554450	5554528	ID=I:5554450-5554528	False	False
I	5726751	5726776	ID=I:5726751-5726776	False	False
I	5745971	5746156	ID=I:5745971-5746156	False	False
I	5861943	5861968	ID=I:5861943-5861968	False	False
I	5914853	5915095	ID=I:5914853-5915095	False	False
I	5975079	5975727	ID=I:5975079-5975727	True	False
I	5977252	5977453	ID=I:5977252-5977453	True	False
I	6051667	6051926	ID=I:6051667-6051926	True	False
I	6052977	6053236	ID=I:6052977-6053236	True	False
I	6135880	6135902	ID=I:6135880-6135902	False	False
I	6189879	6189967	ID=I:6189879-6189967	False	False
I	6373229	6373258	ID=I:6373229-6373258	False	False
I	6473557	6473705	ID=I:6473557-6473705	False	True
I	6573449	6573634	ID=I:6573449-6573634	False	False
I	6658068	6658090	ID=I:6658068-6658090	False	False
I	6931750	6931794	ID=I:6931750-6931794	False	False
I	6933739	6933783	ID=I:6933739-6933783	False	False
I	6949457	6949480	ID=I:6949457-6949480	False	False
I	7004551	7004699	ID=I:7004551-7004699	True	False
I	7086357	7086389	ID=I:7086357-7086389	False	False
I	7186265	7186399	ID=I:7186265-7186399	True	False
I	7224405	7224434	ID=I:7224405-7224434	False	False
I	7239462	7239486	ID=I:7239462-7239486	False	True
I	7284815	7284841	ID=I:7284815-7284841	False	False
I	7318979	7319001	ID=I:7318979-7319001	False	False
I	7330870	7331055	ID=I:7330870-7331055	False	False
I	7356212	7356261	ID=I:7356212-7356261	False	False
I	7527577	7527602	ID=I:7527577-7527602	False	True
I	7633591	7633616	ID=I:7633591-7633616	False	False
I	7641968	7642397	ID=I:7641968-7642397	False	False
I	7666656	7666781	ID=I:7666656-7666781	False	False
I	7699084	7699113	ID=I:7699084-7699113	False	False
I	7779405	7779949	ID=I:7779405-7779949	True	False
I	7782018	7782561	ID=I:7782018-7782561	True	False
I	7845797	7845858	ID=I:7845797-7845858	False	False
I	7935857	7936042	ID=I:7935857-7936042	False	False
I	7970348	7970372	ID=I:7970348-7970372	False	False
I	8105374	8105570	ID=I:8105374-8105570	False	False
I	8213364	8213936	ID=I:8213364-8213936	False	False
I	8246306	8246427	ID=I:8246306-8246427	False	False
I	8439671	8439699	ID=I:8439671-8439699	False	False
I	8484065	8484089	ID=I:8484065-8484089	False	False
I	8637857	8638066	ID=I:8637857-8638066	False	False
I	8664491	8664718	ID=I:8664491-8664718	False	False
I	8749140	8749165	ID=I:8749140-8749165	False	False
I	8757888	8757995	ID=I:8757888-8757995	False	False
I	8761092	8761196	ID=I:8761092-8761196	False	False
I	8789424	8789681	ID=I:8789424-8789681	False	False
I	8808170	8808429	ID=I:8808170-8808429	False	False
I	8863269	8863526	ID=I:8863269-8863526	False	False
I	9080680	9080901	ID=I:9080680-9080901	False	False
I	9145880	9145908	ID=I:9145880-9145908	False	False
I	9212791	9213170	ID=I:9212791-9213170	False	False
I	9307225	9307430	ID=I:9307225-9307430	False	False
I	9384828	9385101	ID=I:9384828-9385101	True	False
I	9439557	9439579	ID=I:9439557-9439579	False	False
I	9481272	9481389	ID=I:9481272-9481389	False	False
I	9505884	9506106	ID=I:9505884-9506106	False	False
I	9545934	9545958	ID=I:9545934-9545958	False	False
I	9605520	9605544	ID=I:9605520-9605544	False	False
I	9630979	9631107	ID=I:9630979-9631107	False	True
I	9682515	9682576	ID=I:9682515-9682576	True	False
I	9811550	9811698	ID=I:9811550-9811698	False	False
I	9883706	9883735	ID=I:9883706-9883735	False	False
I	9970668	9971600	ID=I:9970668-9971600	False	False
I	9983544	9983830	ID=I:9983544-9983830	False	False
I	10030743	10030765	ID=I:10030743-10030765	False	False
I	10181717	10181746	ID=I:10181717-10181746	False	False
I	10184269	10184292	ID=I:10184269-10184292	False	True
I	10263862	10263887	ID=I:10263862-10263887	False	False
I	10372981	10373035	ID=I:10372981-10373035	False	False
I	10464089	10464118	ID=I:10464089-10464118	False	False
I	10485603	10485825	ID=I:10485603-10485825	False	False
I	10487366	10487390	ID=I:10487366-10487390	False	False
I	10593134	10594387	ID=I:10593134-10594387	False	False
I	10620084	10620109	ID=I:10620084-10620109	False	False
I	10657187	10657210	ID=I:10657187-10657210	False	False
I	10678088	10678344	ID=I:10678088-10678344	False	False
I	10749357	10749382	ID=I:10749357-10749382	False	False
I	10889806	10889829	ID=I:10889806-10889829	False	False
I	10929804	10930332	ID=I:10929804-10930332	False	False
I	10966791	10966814	ID=I:10966791-10966814	False	False
I	10986344	10986367	ID=I:10986344-10986367	False	False
I	10997802	10997825	ID=I:10997802-10997825	False	False
I	11082946	11082971	ID=I:11082946-11082971	False	True
I	11091561	11091585	ID=I:11091561-11091585	False	False
I	11101909	11101937	ID=I:11101909-11101937	False	False
I	11104690	11104716	ID=I:11104690-11104716	False	False
I	11108369	11110065	ID=I:11108369-11110065	False	True
I	11111704	11111728	ID=I:11111704-11111728	False	False
I	11155824	11156298	ID=I:11155824-11156298	False	False
I	11165806	11165842	ID=I:11165806-11165842	False	True
I	11183267	11185392	ID=I:11183267-11185392	False	False
I	11203867	11203896	ID=I:11203867-11203896	False	False
I	11206508	11206535	ID=I:11206508-11206535	False	False
I	11215445	11215523	ID=I:11215445-11215523	False	False
I	11232194	11232217	ID=I:11232194-11232217	False	False
I	11233836	11234188	ID=I:11233836-11234188	False	False
I	11255118	11255143	ID=I:11255118-11255143	False	False
I	11324968	11325712	ID=I:11324968-11325712	False	True
I	11344916	11344944	ID=I:11344916-11344944	False	False
I	11357327	11357349	ID=I:11357327-11357349	False	False
I	11420115	11420137	ID=I:11420115-11420137	False	False
I	11453561	11453734	ID=I:11453561-11453734	False	False
I	11467699	11467872	ID=I:11467699-11467872	False	False
I	11476954	11476978	ID=I:11476954-11476978	False	False
I	11519665	11519694	ID=I:11519665-11519694	False	False
I	11521326	11521350	ID=I:11521326-11521350	False	False
I	11561196	11561221	ID=I:11561196-11561221	False	False
I	11565876	11565902	ID=I:11565876-11565902	False	False
I	11580733	11580761	ID=I:11580733-11580761	False	False
I	11582370	11582399	ID=I:11582370-11582399	False	False
I	11585361	11585383	ID=I:11585361-11585383	False	False
I	11735360	11735389	ID=I:11735360-11735389	False	False
I	11764109	11764140	ID=I:11764109-11764140	False	False
I	11795613	11795740	ID=I:11795613-11795740	False	False
I	11830737	11830766	ID=I:11830737-11830766	False	False
I	11832645	11832669	ID=I:11832645-11832669	False	False
I	11871128	11871621	ID=I:11871128-11871621	False	False
I	11872678	11872702	ID=I:11872678-11872702	False	False
I	11874324	11875269	ID=I:11874324-11875269	False	False
I	11885616	11886343	ID=I:11885616-11886343	False	False
I	11930537	11930561	ID=I:11930537-11930561	False	False
I	11932021	11932050	ID=I:11932021-11932050	False	False
I	11970414	11971124	ID=I:11970414-11971124	False	False
I	11997366	11997503	ID=I:11997366-11997503	False	True
I	12003456	12003478	ID=I:12003456-12003478	False	False
I	12010189	12010214	ID=I:12010189-12010214	False	False
I	12055347	12055372	ID=I:12055347-12055372	False	False
I	12057487	12057722	ID=I:12057487-12057722	False	False
I	12067335	12067797	ID=I:12067335-12067797	False	False
I	12071663	12071686	ID=I:12071663-12071686	False	False
I	12098366	12098480	ID=I:12098366-12098480	False	False
I	12143509	12143535	ID=I:12143509-12143535	False	False
I	12164249	12164278	ID=I:12164249-12164278	False	False
I	12180132	12180156	ID=I:12180132-12180156	False	False
I	12219267	12219365	ID=I:12219267-12219365	False	False
I	12295047	12295075	ID=I:12295047-12295075	False	False
I	12322623	12322652	ID=I:12322623-12322652	False	False
I	12445897	12445928	ID=I:12445897-12445928	False	False
I	12575103	12575129	ID=I:12575103-12575129	False	False
I	12587956	12587985	ID=I:12587956-12587985	False	False
I	12623473	12623498	ID=I:12623473-12623498	False	False
I	12646516	12646720	ID=I:12646516-12646720	False	False
I	12726416	12726444	ID=I:12726416-12726444	False	False
I	12740005	12740031	ID=I:12740005-12740031	False	False
I	12811179	12811201	ID=I:12811179-12811201	False	False
I	12819604	12819758	ID=I:12819604-12819758	False	True
I	12824200	12824226	ID=I:12824200-12824226	False	False
I	12849607	12849630	ID=I:12849607-12849630	False	False
I	12852550	12852574	ID=I:12852550-12852574	False	False
I	12854921	12854957	ID=I:12854921-12854957	False	True
I	12858579	12858836	ID=I:12858579-12858836	False	False
I	12859997	12860021	ID=I:12859997-12860021	False	False
I	12864635	12864658	ID=I:12864635-12864658	False	False
I	12874847	12874870	ID=I:12874847-12874870	False	False
I	12882875	12883062	ID=I:12882875-12883062	False	True
I	12891106	12891128	ID=I:12891106-12891128	False	False
I	12909474	12909500	ID=I:12909474-12909500	False	False
I	12911990	12912247	ID=I:12911990-12912247	False	False
I	12916893	12917087	ID=I:12916893-12917087	False	False
I	12927220	12927567	ID=I:12927220-12927567	False	False
I	12974917	12974939	ID=I:12974917-12974939	False	False
I	12993315	12993339	ID=I:12993315-12993339	False	False
I	13009684	13009710	ID=I:13009684-13009710	False	False
I	13015022	13015045	ID=I:13015022-13015045	False	False
I	13273342	13273795	ID=I:13273342-13273795	False	False
I	13276956	13277298	ID=I:13276956-13277298	False	False
I	13283122	13283145	ID=I:13283122-13283145	False	True
I	13286901	13286938	ID=I:13286901-13286938	False	False
I	13296060	13296082	ID=I:13296060-13296082	False	False
I	13312396	13312420	ID=I:13312396-13312420	False	False
I	13325055	13325462	ID=I:13325055-13325462	False	False
I	13351534	13351556	ID=I:13351534-13351556	False	False
I	13360249	13360431	ID=I:13360249-13360431	False	True
I	13363096	13363307	ID=I:13363096-13363307	False	True
I	13368937	13369455	ID=I:13368937-13369455	False	False
I	13380458	13380481	ID=I:13380458-13380481	False	False
I	13411902	13411924	ID=I:13411902-13411924	False	False
I	13442012	13442035	ID=I:13442012-13442035	False	False
I	13462777	13462798	ID=I:13462777-13462798	False	False
I	13466979	13467235	ID=I:13466979-13467235	False	True
I	13484796	13484944	ID=I:13484796-13484944	False	True
I	13531075	13531100	ID=I:13531075-13531100	False	False
I	13545257	13545280	ID=I:13545257-13545280	False	False
I	13546858	13546957	ID=I:13546858-13546957	False	False
I	13552168	13552510	ID=I:13552168-13552510	False	False
I	13565063	13565086	ID=I:13565063-13565086	False	False
I	13584271	13584333	ID=I:13584271-13584333	True	True
I	13660750	13661161	ID=I:13660750-13661161	False	False
I	13662964	13663036	ID=I:13662964-13663036	False	False
I	13664396	13664419	ID=I:13664396-13664419	False	False
I	13672346	13672369	ID=I:13672346-13672369	False	False
I	13737821	13738872	ID=I:13737821-13738872	False	True
I	13745465	13745654	ID=I:13745465-13745654	False	False
I	13749551	13749576	ID=I:13749551-13749576	False	False
I	13825950	13826178	ID=I:13825950-13826178	False	False
I	13841298	13841320	ID=I:13841298-13841320	False	False
I	13844571	13844597	ID=I:13844571-13844597	False	False
I	13854190	13854447	ID=I:13854190-13854447	False	False
I	13876392	13876607	ID=I:13876392-13876607	False	False
I	13890973	13890996	ID=I:13890973-13890996	False	False
I	13893594	13893617	ID=I:13893594-13893617	False	False
I	13914480	13914505	ID=I:13914480-13914505	False	False
I	13934409	13934591	ID=I:13934409-13934591	False	False
I	13958429	13958452	ID=I:13958429-13958452	False	False
I	13987222	13987343	ID=I:13987222-13987343	False	True
I	13988765	13989085	ID=I:13988765-13989085	False	False
I	14007578	14007600	ID=I:14007578-14007600	False	False
I	14011100	14011123	ID=I:14011100-14011123	False	False
I	14080851	14080954	ID=I:14080851-14080954	False	False
I	14083360	14083570	ID=I:14083360-14083570	False	False
I	14088656	14088685	ID=I:14088656-14088685	False	False
I	14089927	14089950	ID=I:14089927-14089950	False	False
I	14098322	14098684	ID=I:14098322-14098684	False	False
I	14100423	14100446	ID=I:14100423-14100446	False	False
I	14125787	14125810	ID=I:14125787-14125810	False	False
I	14127821	14128488	ID=I:14127821-14128488	False	False
I	14135636	14135660	ID=I:14135636-14135660	False	False
I	14144020	14144049	ID=I:14144020-14144049	False	False
I	14167547	14167667	ID=I:14167547-14167667	False	False
I	14187005	14187091	ID=I:14187005-14187091	False	False
I	14192263	14192291	ID=I:14192263-14192291	False	False
I	14201728	14202356	ID=I:14201728-14202356	True	False
I	14216189	14216306	ID=I:14216189-14216306	False	False
I	14271471	14271500	ID=I:14271471-14271500	False	False
I	14280938	14281058	ID=I:14280938-14281058	False	False
I	14311123	14312056	ID=I:14311123-14312056	False	False
I	14317209	14317238	ID=I:14317209-14317238	False	False
I	14319687	14319713	ID=I:14319687-14319713	False	False
I	14326050	14326277	ID=I:14326050-14326277	False	False
I	14327757	14327781	ID=I:14327757-14327781	False	False
I	14329347	14329378	ID=I:14329347-14329378	False	False
I	14333616	14334153	ID=I:14333616-14334153	False	False
I	14339943	14340272	ID=I:14339943-14340272	False	False
I	14341354	14341452	ID=I:14341354-14341452	False	False
I	14350655	14351351	ID=I:14350655-14351351	False	True
I	14354197	14356628	ID=I:14354197-14356628	False	False
I	14375685	14375709	ID=I:14375685-14375709	False	False
I	14388085	14388366	ID=I:14388085-14388366	False	False
I	14393652	14393681	ID=I:14393652-14393681	False	False
I	14399116	14399138	ID=I:14399116-14399138	False	False
I	14401540	14401564	ID=I:14401540-14401564	False	False
I	14403770	14403794	ID=I:14403770-14403794	False	False
I	14407195	14407218	ID=I:14407195-14407218	False	False
I	14414152	14414175	ID=I:14414152-14414175	False	False
I	14421157	14421849	ID=I:14421157-14421849	False	False
I	14429720	14429833	ID=I:14429720-14429833	False	False
I	14439938	14439969	ID=I:14439938-14439969	False	False
I	14445487	14445972	ID=I:14445487-14445972	False	False
I	14448327	14448361	ID=I:14448327-14448361	False	False
I	14450108	14450133	ID=I:14450108-14450133	False	False
I	14458774	14458800	ID=I:14458774-14458800	False	False
I	14475824	14476292	ID=I:14475824-14476292	False	False
I	14479601	14479957	ID=I:14479601-14479957	False	False
I	14485995	14486024	ID=I:14485995-14486024	False	False
I	14501027	14501589	ID=I:14501027-14501589	False	False
I	14519671	14519725	ID=I:14519671-14519725	False	True
I	14521018	14522436	ID=I:14521018-14522436	False	True
I	14532537	14532834	ID=I:14532537-14532834	False	False
I	14535596	14535621	ID=I:14535596-14535621	False	False
I	14538999	14539027	ID=I:14538999-14539027	False	False
I	14541146	14541172	ID=I:14541146-14541172	False	False
I	14554696	14554718	ID=I:14554696-14554718	False	False
I	14562954	14563177	ID=I:14562954-14563177	False	False
I	14567830	14568290	ID=I:14567830-14568290	False	True
I	14593701	14593723	ID=I:14593701-14593723	False	True
I	14595944	14595969	ID=I:14595944-14595969	False	False
I	14600357	14600490	ID=I:14600357-14600490	False	True
I	14604691	14605452	ID=I:14604691-14605452	False	True
I	14609694	14610667	ID=I:14609694-14610667	True	True
I	14615440	14615464	ID=I:14615440-14615464	False	False
I	14616776	14618410	ID=I:14616776-14618410	False	False
I	14626163	14626188	ID=I:14626163-14626188	False	False
I	14627468	14627722	ID=I:14627468-14627722	False	False
I	14632286	14632459	ID=I:14632286-14632459	False	False
I	14637743	14637765	ID=I:14637743-14637765	False	False
I	14646300	14646326	ID=I:14646300-14646326	False	False
I	14654584	14655344	ID=I:14654584-14655344	False	False
I	14659934	14660695	ID=I:14659934-14660695	False	True
I	14662055	14662165	ID=I:14662055-14662165	False	True
I	14664935	14664958	ID=I:14664935-14664958	False	False
I	14717302	14717324	ID=I:14717302-14717324	False	False
I	14731472	14731495	ID=I:14731472-14731495	False	False
I	14747998	14748293	ID=I:14747998-14748293	False	False
I	14754304	14754477	ID=I:14754304-14754477	False	False
I	14758743	14758765	ID=I:14758743-14758765	False	False
I	14777042	14777064	ID=I:14777042-14777064	False	False
I	14799706	14799888	ID=I:14799706-14799888	False	False
I	14839377	14839399	ID=I:14839377-14839399	False	False
I	14842304	14842390	ID=I:14842304-14842390	False	False
I	14917223	14917292	ID=I:14917223-14917292	False	False
I	14988376	14988407	ID=I:14988376-14988407	False	False
I	14998794	14998817	ID=I:14998794-14998817	False	False
I	15004333	15004450	ID=I:15004333-15004450	False	False
I	15014219	15014568	ID=I:15014219-15014568	False	False
I	15015572	15015601	ID=I:15015572-15015601	False	False
I	15035576	15035599	ID=I:15035576-15035599	False	False
I	15060606	15061141	ID=I:15060606-15061141	False	False
I	15063314	15068337	ID=I:15063314-15068337	False	False
I	15070511	15070928	ID=I:15070511-15070928	False	False
II	40360	40431	ID=II:40360-40431	True	False
II	92337	92360	ID=II:92337-92360	False	False
II	141278	141427	ID=II:141278-141427	True	False
II	145581	145730	ID=II:145581-145730	False	False
II	153413	153438	ID=II:153413-153438	False	False
II	228207	228660	ID=II:228207-228660	False	True
II	241496	241519	ID=II:241496-241519	False	False
II	244436	244584	ID=II:244436-244584	False	True
II	250256	250277	ID=II:250256-250277	False	False
II	255724	256074	ID=II:255724-256074	False	False
II	268176	268672	ID=II:268176-268672	False	False
II	287555	287702	ID=II:287555-287702	False	False
II	405508	405983	ID=II:405508-405983	False	False
II	410007	410030	ID=II:410007-410030	False	False
II	415099	415246	ID=II:415099-415246	False	False
II	466853	467606	ID=II:466853-467606	False	False
II	472804	472827	ID=II:472804-472827	False	False
II	474780	474929	ID=II:474780-474929	False	False
II	498971	498994	ID=II:498971-498994	False	False
II	520991	521114	ID=II:520991-521114	False	False
II	541822	541851	ID=II:541822-541851	False	False
II	571301	571422	ID=II:571301-571422	False	False
II	577434	578819	ID=II:577434-578819	False	False
II	581336	581549	ID=II:581336-581549	False	False
II	586317	587044	ID=II:586317-587044	False	False
II	591667	591698	ID=II:591667-591698	False	False
II	596416	596438	ID=II:596416-596438	False	False
II	629167	629816	ID=II:629167-629816	False	False
II	646386	646408	ID=II:646386-646408	False	False
II	678582	678605	ID=II:678582-678605	False	False
II	690546	690751	ID=II:690546-690751	False	False
II	700074	700097	ID=II:700074-700097	False	False
II	703072	703221	ID=II:703072-703221	False	False
II	708728	708751	ID=II:708728-708751	False	False
II	713567	713590	ID=II:713567-713590	False	False
II	715100	715129	ID=II:715100-715129	False	False
II	716411	716432	ID=II:716411-716432	False	False
II	733006	733092	ID=II:733006-733092	False	False
II	814998	815023	ID=II:814998-815023	False	False
II	923517	923542	ID=II:923517-923542	False	False
II	925401	925422	ID=II:925401-925422	False	False
II	950743	950769	ID=II:950743-950769	False	False
II	953480	953504	ID=II:953480-953504	False	False
II	985803	985828	ID=II:985803-985828	False	False
II	996809	996834	ID=II:996809-996834	True	False
II	998861	998886	ID=II:998861-998886	False	False
II	1044274	1044296	ID=II:1044274-1044296	False	False
II	1052831	1052856	ID=II:1052831-1052856	False	False
II	1054809	1054834	ID=II:1054809-1054834	False	False
II	1155383	1155412	ID=II:1155383-1155412	False	False
II	1198451	1198633	ID=II:1198451-1198633	True	False
II	1221949	1223450	ID=II:1221949-1223450	True	False
II	1305587	1305610	ID=II:1305587-1305610	False	False
II	1308593	1308616	ID=II:1308593-1308616	False	False
II	1312058	1312270	ID=II:1312058-1312270	False	False
II	1313982	1314005	ID=II:1313982-1314005	False	False
II	1315299	1315815	ID=II:1315299-1315815	False	False
II	1317392	1317415	ID=II:1317392-1317415	False	False
II	1319239	1319553	ID=II:1319239-1319553	False	False
II	1328626	1328649	ID=II:1328626-1328649	False	False
II	1361809	1361832	ID=II:1361809-1361832	False	False
II	1370968	1371342	ID=II:1370968-1371342	False	False
II	1373715	1373738	ID=II:1373715-1373738	False	False
II	1375075	1375277	ID=II:1375075-1375277	False	False
II	1398363	1398388	ID=II:1398363-1398388	False	False
II	1401326	1401349	ID=II:1401326-1401349	False	False
II	1404597	1404998	ID=II:1404597-1404998	False	False
II	1408500	1408582	ID=II:1408500-1408582	False	False
II	1410047	1410071	ID=II:1410047-1410071	False	False
II	1416293	1416316	ID=II:1416293-1416316	False	False
II	1419207	1419658	ID=II:1419207-1419658	False	False
II	1422971	1423566	ID=II:1422971-1423566	False	False
II	1435723	1436250	ID=II:1435723-1436250	False	False
II	1439800	1439948	ID=II:1439800-1439948	False	False
II	1490574	1490600	ID=II:1490574-1490600	False	False
II	1510004	1510032	ID=II:1510004-1510032	False	False
II	1592409	1592434	ID=II:1592409-1592434	False	False
II	1805057	1805079	ID=II:1805057-1805079	False	False
II	1821864	1821887	ID=II:1821864-1821887	False	False
II	1848522	1848550	ID=II:1848522-1848550	False	False
II	1892074	1892099	ID=II:1892074-1892099	False	False
II	1913790	1913817	ID=II:1913790-1913817	False	False
II	1990944	1990969	ID=II:1990944-1990969	False	False
II	2015153	2015178	ID=II:2015153-2015178	False	False
II	2024845	2025104	ID=II:2024845-2025104	True	False
II	2036854	2036880	ID=II:2036854-2036880	False	False
II	2041992	2042178	ID=II:2041992-2042178	False	False
II	2112718	2112744	ID=II:2112718-2112744	False	False
II	2136560	2136586	ID=II:2136560-2136586	False	False
II	2219385	2219494	ID=II:2219385-2219494	False	False
II	2298801	2298824	ID=II:2298801-2298824	False	False
II	2325815	2325843	ID=II:2325815-2325843	False	False
II	2361780	2362136	ID=II:2361780-2362136	False	False
II	2366449	2366474	ID=II:2366449-2366474	False	False
II	2391383	2391409	ID=II:2391383-2391409	False	False
II	2502409	2502440	ID=II:2502409-2502440	False	False
II	2550422	2550445	ID=II:2550422-2550445	True	False
II	2551966	2551989	ID=II:2551966-2551989	True	False
II	2557390	2557418	ID=II:2557390-2557418	False	False
II	2559538	2559562	ID=II:2559538-2559562	False	False
II	2565859	2566144	ID=II:2565859-2566144	False	False
II	2615133	2615306	ID=II:2615133-2615306	False	False
II	2637916	2637942	ID=II:2637916-2637942	False	False
II	2639233	2639256	ID=II:2639233-2639256	False	False
II	2670282	2670311	ID=II:2670282-2670311	False	False
II	2681447	2681552	ID=II:2681447-2681552	False	False
II	2702172	2702196	ID=II:2702172-2702196	False	False
II	2726420	2726451	ID=II:2726420-2726451	False	False
II	2735785	2736289	ID=II:2735785-2736289	False	False
II	2786548	2786570	ID=II:2786548-2786570	False	False
II	2892493	2892635	ID=II:2892493-2892635	False	False
II	2906223	2906365	ID=II:2906223-2906365	False	False
II	2959136	2959159	ID=II:2959136-2959159	False	False
II	3016132	3016160	ID=II:3016132-3016160	False	False
II	3054419	3055391	ID=II:3054419-3055391	False	False
II	3088247	3088356	ID=II:3088247-3088356	False	False
II	3110075	3110098	ID=II:3110075-3110098	False	False
II	3118924	3118953	ID=II:3118924-3118953	False	False
II	3134601	3134627	ID=II:3134601-3134627	False	False
II	3178657	3178682	ID=II:3178657-3178682	False	False
II	3187024	3187055	ID=II:3187024-3187055	False	False
II	3289253	3289742	ID=II:3289253-3289742	False	False
II	3291735	3291758	ID=II:3291735-3291758	False	False
II	3302903	3302959	ID=II:3302903-3302959	False	False
II	3304217	3304239	ID=II:3304217-3304239	False	False
II	3306214	3306791	ID=II:3306214-3306791	False	False
II	3309248	3309358	ID=II:3309248-3309358	False	False
II	3310574	3310810	ID=II:3310574-3310810	False	False
II	3327739	3327765	ID=II:3327739-3327765	False	False
II	3351187	3351209	ID=II:3351187-3351209	False	False
II	3358070	3358469	ID=II:3358070-3358469	False	False
II	3368371	3368395	ID=II:3368371-3368395	False	False
II	3370353	3370379	ID=II:3370353-3370379	False	False
II	3374635	3374657	ID=II:3374635-3374657	False	False
II	3455591	3455617	ID=II:3455591-3455617	False	False
II	3478794	3478817	ID=II:3478794-3478817	False	False
II	3532060	3532272	ID=II:3532060-3532272	False	False
II	3574118	3574143	ID=II:3574118-3574143	False	False
II	3596511	3596533	ID=II:3596511-3596533	False	False
II	3597621	3597643	ID=II:3597621-3597643	False	False
II	3634856	3635015	ID=II:3634856-3635015	False	False
II	3756580	3756605	ID=II:3756580-3756605	False	False
II	3803789	3803810	ID=II:3803789-3803810	False	False
II	3921202	3921231	ID=II:3921202-3921231	False	False
II	3969860	3969882	ID=II:3969860-3969882	False	False
II	3992513	3992536	ID=II:3992513-3992536	False	False
II	3994683	3994705	ID=II:3994683-3994705	False	False
II	4051538	4051561	ID=II:4051538-4051561	False	False
II	4054128	4054151	ID=II:4054128-4054151	False	False
II	4061768	4062523	ID=II:4061768-4062523	True	True
II	4120688	4120712	ID=II:4120688-4120712	False	False
II	4123048	4123071	ID=II:4123048-4123071	False	False
II	4185350	4185378	ID=II:4185350-4185378	False	False
II	4232822	4232851	ID=II:4232822-4232851	False	False
II	4241792	4242069	ID=II:4241792-4242069	False	False
II	4255628	4255659	ID=II:4255628-4255659	False	False
II	4292615	4292644	ID=II:4292615-4292644	False	False
II	4327644	4327666	ID=II:4327644-4327666	False	False
II	4339439	4339585	ID=II:4339439-4339585	False	True
II	4422890	4422913	ID=II:4422890-4422913	False	False
II	4591769	4591965	ID=II:4591769-4591965	False	False
II	4645070	4645092	ID=II:4645070-4645092	False	False
II	5105906	5105929	ID=II:5105906-5105929	False	False
II	5158622	5158645	ID=II:5158622-5158645	False	False
II	5319185	5319292	ID=II:5319185-5319292	False	False
II	5546021	5546400	ID=II:5546021-5546400	False	False
II	5565123	5565376	ID=II:5565123-5565376	False	False
II	5626019	5626043	ID=II:5626019-5626043	False	False
II	5782263	5782284	ID=II:5782263-5782284	False	False
II	6082019	6082205	ID=II:6082019-6082205	False	False
II	6298993	6299018	ID=II:6298993-6299018	False	False
II	6462204	6462386	ID=II:6462204-6462386	False	False
II	6585708	6585732	ID=II:6585708-6585732	False	False
II	6795360	6795383	ID=II:6795360-6795383	False	False
II	6797949	6797972	ID=II:6797949-6797972	False	False
II	6898204	6898233	ID=II:6898204-6898233	False	False
II	7023181	7023259	ID=II:7023181-7023259	False	False
II	7088515	7088806	ID=II:7088515-7088806	False	True
II	7353058	7353203	ID=II:7353058-7353203	False	False
II	7367524	7367625	ID=II:7367524-7367625	True	False
II	7371697	7372623	ID=II:7371697-7372623	False	False
II	7475204	7475409	ID=II:7475204-7475409	False	True
II	7478963	7479169	ID=II:7478963-7479169	False	False
II	7785810	7786070	ID=II:7785810-7786070	False	False
II	7837604	7837786	ID=II:7837604-7837786	False	False
II	7860964	7860986	ID=II:7860964-7860986	False	False
II	8011783	8011875	ID=II:8011783-8011875	False	False
II	8049675	8049698	ID=II:8049675-8049698	False	False
II	8215163	8215249	ID=II:8215163-8215249	True	False
II	8229391	8229648	ID=II:8229391-8229648	False	False
II	8268659	8269081	ID=II:8268659-8269081	False	True
II	8860392	8860834	ID=II:8860392-8860834	False	True
II	8862199	8862221	ID=II:8862199-8862221	True	False
II	8863270	8863529	ID=II:8863270-8863529	True	False
II	9174001	9174213	ID=II:9174001-9174213	False	False
II	9274694	9274718	ID=II:9274694-9274718	False	True
II	9363458	9363480	ID=II:9363458-9363480	False	False
II	9393432	9393691	ID=II:9393432-9393691	True	False
II	9668961	9668985	ID=II:9668961-9668985	False	False
II	9717014	9717037	ID=II:9717014-9717037	False	False
II	9937202	9937225	ID=II:9937202-9937225	False	False
II	9944530	9944554	ID=II:9944530-9944554	False	False
II	10170423	10170448	ID=II:10170423-10170448	False	False
II	10594534	10594558	ID=II:10594534-10594558	False	False
II	10812525	10812547	ID=II:10812525-10812547	False	False
II	10831082	10832308	ID=II:10831082-10832308	False	False
II	10850374	10850396	ID=II:10850374-10850396	False	False
II	10867151	10867174	ID=II:10867151-10867174	False	False
II	11099566	11099802	ID=II:11099566-11099802	False	False
II	11122122	11122361	ID=II:11122122-11122361	False	False
II	11197057	11197318	ID=II:11197057-11197318	True	False
II	11198373	11198632	ID=II:11198373-11198632	True	True
II	11229922	11230502	ID=II:11229922-11230502	False	False
II	11297209	11297233	ID=II:11297209-11297233	False	False
II	11458326	11458538	ID=II:11458326-11458538	False	False
II	11521033	11521055	ID=II:11521033-11521055	False	False
II	11527972	11528351	ID=II:11527972-11528351	True	False
II	11530157	11530382	ID=II:11530157-11530382	True	False
II	11531873	11531895	ID=II:11531873-11531895	False	False
II	11532924	11533090	ID=II:11532924-11533090	False	False
II	11551976	11552427	ID=II:11551976-11552427	False	False
II	11695660	11695845	ID=II:11695660-11695845	False	False
II	11867710	11867733	ID=II:11867710-11867733	False	True
II	11900394	11900418	ID=II:11900394-11900418	False	False
II	11918691	11918881	ID=II:11918691-11918881	False	False
II	11922012	11922038	ID=II:11922012-11922038	False	False
II	12016441	12016472	ID=II:12016441-12016472	False	False
II	12038667	12038696	ID=II:12038667-12038696	False	False
II	12040572	12040594	ID=II:12040572-12040594	False	True
II	12051284	12052102	ID=II:12051284-12052102	False	False
II	12076365	12076569	ID=II:12076365-12076569	False	False
II	12116705	12116729	ID=II:12116705-12116729	False	False
II	12128201	12128224	ID=II:12128201-12128224	False	False
II	12129258	12129320	ID=II:12129258-12129320	False	False
II	12135410	12135569	ID=II:12135410-12135569	False	False
II	12136784	12137420	ID=II:12136784-12137420	False	False
II	12139665	12140338	ID=II:12139665-12140338	False	False
II	12147692	12148206	ID=II:12147692-12148206	False	False
II	12161032	12161055	ID=II:12161032-12161055	False	False
II	12163612	12163636	ID=II:12163612-12163636	False	True
II	12167263	12167426	ID=II:12167263-12167426	False	False
II	12186426	12186455	ID=II:12186426-12186455	False	False
II	12188208	12188231	ID=II:12188208-12188231	False	False
II	12200266	12200291	ID=II:12200266-12200291	False	False
II	12218205	12218341	ID=II:12218205-12218341	False	True
II	12240663	12240692	ID=II:12240663-12240692	False	False
II	12251099	12251125	ID=II:12251099-12251125	False	False
II	12253976	12253997	ID=II:12253976-12253997	False	False
II	12262042	12262173	ID=II:12262042-12262173	False	True
II	12263532	12263594	ID=II:12263532-12263594	False	True
II	12264698	12264722	ID=II:12264698-12264722	False	False
II	12266621	12266645	ID=II:12266621-12266645	False	False
II	12282046	12282068	ID=II:12282046-12282068	True	False
II	12326871	12326893	ID=II:12326871-12326893	False	False
II	12355336	12355365	ID=II:12355336-12355365	False	False
II	12358373	12358404	ID=II:12358373-12358404	False	False
II	12363913	12363942	ID=II:12363913-12363942	False	False
II	12387225	12387250	ID=II:12387225-12387250	False	False
II	12454772	12454796	ID=II:12454772-12454796	False	False
II	12519903	12520655	ID=II:12519903-12520655	False	False
II	12582549	12583309	ID=II:12582549-12583309	False	True
II	12585231	12585253	ID=II:12585231-12585253	False	False
II	12599462	12600253	ID=II:12599462-12600253	False	True
II	12626944	12626966	ID=II:12626944-12626966	False	False
II	12657504	12657527	ID=II:12657504-12657527	False	False
II	12665702	12665731	ID=II:12665702-12665731	False	False
II	12669661	12669692	ID=II:12669661-12669692	False	False
II	12672120	12672592	ID=II:12672120-12672592	False	False
II	12691316	12691345	ID=II:12691316-12691345	False	False
II	12704001	12704525	ID=II:12704001-12704525	False	False
II	12713121	12713212	ID=II:12713121-12713212	False	True
II	12714741	12714764	ID=II:12714741-12714764	False	False
II	12719591	12719615	ID=II:12719591-12719615	False	True
II	12750649	12750674	ID=II:12750649-12750674	False	False
II	12776486	12776509	ID=II:12776486-12776509	False	False
II	12785750	12785804	ID=II:12785750-12785804	False	False
II	12801806	12801831	ID=II:12801806-12801831	False	True
II	12806540	12806562	ID=II:12806540-12806562	False	False
II	12812752	12812778	ID=II:12812752-12812778	False	False
II	12814898	12814929	ID=II:12814898-12814929	False	False
II	12838680	12838709	ID=II:12838680-12838709	False	False
II	12843012	12843040	ID=II:12843012-12843040	False	False
II	12875364	12875392	ID=II:12875364-12875392	False	False
II	12881613	12881636	ID=II:12881613-12881636	False	False
II	12894671	12894697	ID=II:12894671-12894697	False	False
II	12902783	12902808	ID=II:12902783-12902808	False	False
II	12905956	12905987	ID=II:12905956-12905987	False	False
II	12911096	12911117	ID=II:12911096-12911117	False	False
II	12918017	12918040	ID=II:12918017-12918040	False	True
II	12947082	12947111	ID=II:12947082-12947111	False	False
II	12953935	12954006	ID=II:12953935-12954006	True	False
II	12956311	12956340	ID=II:12956311-12956340	False	False
II	12971496	12971521	ID=II:12971496-12971521	False	False
II	13012163	13012949	ID=II:13012163-13012949	False	False
II	13014969	13015044	ID=II:13014969-13015044	False	False
II	13025379	13025418	ID=II:13025379-13025418	False	False
II	13033811	13034601	ID=II:13033811-13034601	False	False
II	13035634	13035665	ID=II:13035634-13035665	False	False
II	13057504	13057612	ID=II:13057504-13057612	False	False
II	13066437	13066468	ID=II:13066437-13066468	False	False
II	13092203	13092227	ID=II:13092203-13092227	False	False
II	13105059	13105801	ID=II:13105059-13105801	False	False
II	13110983	13111011	ID=II:13110983-13111011	False	False
II	13118536	13118566	ID=II:13118536-13118566	False	False
II	13120367	13120403	ID=II:13120367-13120403	False	False
II	13190072	13190275	ID=II:13190072-13190275	False	True
II	13202322	13202536	ID=II:13202322-13202536	False	False
II	13217630	13217652	ID=II:13217630-13217652	False	False
II	13220363	13220386	ID=II:13220363-13220386	False	False
II	13241938	13241969	ID=II:13241938-13241969	False	False
II	13260177	13260198	ID=II:13260177-13260198	False	False
II	13262353	13262375	ID=II:13262353-13262375	False	False
II	13266386	13266417	ID=II:13266386-13266417	False	False
II	13334408	13334437	ID=II:13334408-13334437	False	False
II	13336641	13336666	ID=II:13336641-13336666	False	False
II	13358433	13358464	ID=II:13358433-13358464	False	False
II	13383693	13384146	ID=II:13383693-13384146	False	True
II	13387220	13387242	ID=II:13387220-13387242	False	False
II	13392747	13393297	ID=II:13392747-13393297	False	True
II	13410788	13411570	ID=II:13410788-13411570	False	False
II	13452467	13452489	ID=II:13452467-13452489	False	False
II	13473068	13473950	ID=II:13473068-13473950	False	False
II	13477912	13478838	ID=II:13477912-13478838	False	False
II	13482061	13482083	ID=II:13482061-13482083	False	False
II	13486650	13488365	ID=II:13486650-13488365	False	True
II	13489695	13490541	ID=II:13489695-13490541	False	False
II	13509316	13509345	ID=II:13509316-13509345	False	False
II	13514668	13514691	ID=II:13514668-13514691	False	False
II	13519781	13520288	ID=II:13519781-13520288	False	False
II	13522356	13522379	ID=II:13522356-13522379	False	False
II	13538638	13538660	ID=II:13538638-13538660	False	False
II	13559016	13559039	ID=II:13559016-13559039	False	True
II	13616489	13616518	ID=II:13616489-13616518	False	False
II	13637978	13638009	ID=II:13637978-13638009	False	False
II	13653682	13653708	ID=II:13653682-13653708	False	False
II	13726989	13727025	ID=II:13726989-13727025	False	True
II	13754324	13754346	ID=II:13754324-13754346	False	False
II	13815020	13815042	ID=II:13815020-13815042	False	False
II	13853615	13853763	ID=II:13853615-13853763	False	False
II	13854851	13854873	ID=II:13854851-13854873	False	False
II	13886982	13887312	ID=II:13886982-13887312	False	False
II	13891574	13891916	ID=II:13891574-13891916	False	False
II	13926108	13926562	ID=II:13926108-13926562	False	False
II	13933988	13934019	ID=II:13933988-13934019	False	False
II	13953755	13953781	ID=II:13953755-13953781	False	False
II	13959889	13960366	ID=II:13959889-13960366	False	False
II	13969746	13970097	ID=II:13969746-13970097	False	False
II	13984943	13987165	ID=II:13984943-13987165	False	False
II	14021224	14021434	ID=II:14021224-14021434	False	False
II	14034279	14034310	ID=II:14034279-14034310	False	False
II	14064709	14065469	ID=II:14064709-14065469	False	True
II	14073998	14074108	ID=II:14073998-14074108	False	False
II	14082367	14082390	ID=II:14082367-14082390	False	False
II	14126222	14126244	ID=II:14126222-14126244	False	False
II	14135441	14135782	ID=II:14135441-14135782	False	True
II	14142296	14142553	ID=II:14142296-14142553	False	False
II	14160108	14160367	ID=II:14160108-14160367	True	False
II	14161417	14161676	ID=II:14161417-14161676	True	False
II	14163739	14163887	ID=II:14163739-14163887	False	True
II	14167120	14167142	ID=II:14167120-14167142	False	False
II	14174174	14174620	ID=II:14174174-14174620	False	False
II	14187294	14187325	ID=II:14187294-14187325	False	False
II	14222649	14223407	ID=II:14222649-14223407	False	True
II	14251071	14251093	ID=II:14251071-14251093	False	False
II	14261042	14261065	ID=II:14261042-14261065	False	False
II	14277225	14277415	ID=II:14277225-14277415	False	True
II	14279517	14279774	ID=II:14279517-14279774	False	False
II	14299074	14299100	ID=II:14299074-14299100	False	False
II	14300307	14300330	ID=II:14300307-14300330	False	False
II	14310526	14310648	ID=II:14310526-14310648	False	False
II	14313673	14313695	ID=II:14313673-14313695	False	False
II	14324068	14331855	ID=II:14324068-14331855	False	False
II	14393853	14393878	ID=II:14393853-14393878	False	False
II	14712882	14712907	ID=II:14712882-14712907	False	False
II	14719952	14719977	ID=II:14719952-14719977	False	False
II	14726091	14726115	ID=II:14726091-14726115	False	False
II	14732187	14732209	ID=II:14732187-14732209	False	False
II	14736675	14737054	ID=II:14736675-14737054	False	False
II	14742099	14742248	ID=II:14742099-14742248	False	False
II	14773379	14773513	ID=II:14773379-14773513	False	False
II	14915030	14915056	ID=II:14915030-14915056	False	False
II	14916799	14916827	ID=II:14916799-14916827	False	False
II	14996226	14996255	ID=II:14996226-14996255	False	False
II	15045623	15045646	ID=II:15045623-15045646	False	True
II	15112977	15113000	ID=II:15112977-15113000	False	False
II	15124816	15124904	ID=II:15124816-15124904	False	False
II	15143084	15143108	ID=II:15143084-15143108	False	False
II	15213475	15213500	ID=II:15213475-15213500	False	True
II	15216188	15216217	ID=II:15216188-15216217	False	False
II	15222432	15222494	ID=II:15222432-15222494	False	True
II	15260281	15260307	ID=II:15260281-15260307	False	False
II	15271524	15271552	ID=II:15271524-15271552	False	False
III	26534	26563	ID=III:26534-26563	False	False
III	62213	62236	ID=III:62213-62236	False	False
III	96672	96703	ID=III:96672-96703	False	False
III	160906	161899	ID=III:160906-161899	True	False
III	200649	201098	ID=III:200649-201098	False	True
III	202376	202405	ID=III:202376-202405	False	False
III	222704	222727	ID=III:222704-222727	False	False
III	226598	226629	ID=III:226598-226629	False	False
III	230702	230725	ID=III:230702-230725	False	False
III	296913	297037	ID=III:296913-297037	False	False
III	298167	299061	ID=III:298167-299061	False	True
III	301024	301052	ID=III:301024-301052	False	False
III	305194	305217	ID=III:305194-305217	False	False
III	316078	316838	ID=III:316078-316838	False	True
III	320541	320992	ID=III:320541-320992	False	False
III	335273	335482	ID=III:335273-335482	False	True
III	342383	342408	ID=III:342383-342408	False	False
III	353497	353526	ID=III:353497-353526	False	False
III	355583	355992	ID=III:355583-355992	False	True
III	358311	358333	ID=III:358311-358333	False	False
III	370309	370344	ID=III:370309-370344	False	False
III	403114	403138	ID=III:403114-403138	False	False
III	404672	404695	ID=III:404672-404695	False	False
III	407350	407383	ID=III:407350-407383	False	False
III	409423	409491	ID=III:409423-409491	False	False
III	413326	413362	ID=III:413326-413362	False	True
III	420746	420774	ID=III:420746-420774	False	False
III	432574	432599	ID=III:432574-432599	False	False
III	457685	457779	ID=III:457685-457779	False	False
III	467452	467691	ID=III:467452-467691	False	False
III	483458	483484	ID=III:483458-483484	True	False
III	485092	485121	ID=III:485092-485121	False	False
III	487229	487258	ID=III:487229-487258	False	False
III	497195	497226	ID=III:497195-497226	False	False
III	535432	535454	ID=III:535432-535454	False	False
III	548278	548309	ID=III:548278-548309	False	False
III	557177	557202	ID=III:557177-557202	False	False
III	559646	559667	ID=III:559646-559667	False	False
III	574568	574592	ID=III:574568-574592	False	False
III	583101	583857	ID=III:583101-583857	False	False
III	592707	592733	ID=III:592707-592733	False	True
III	594529	594552	ID=III:594529-594552	False	True
III	601713	601736	ID=III:601713-601736	False	False
III	630754	630785	ID=III:630754-630785	False	False
III	649210	649233	ID=III:649210-649233	False	False
III	717650	717679	ID=III:717650-717679	False	False
III	819944	819966	ID=III:819944-819966	False	False
III	885978	886002	ID=III:885978-886002	False	False
III	923170	923195	ID=III:923170-923195	False	False
III	931132	931154	ID=III:931132-931154	False	False
III	938529	938554	ID=III:938529-938554	False	False
III	1022556	1022592	ID=III:1022556-1022592	False	False
III	1121446	1121469	ID=III:1121446-1121469	False	False
III	1251974	1252939	ID=III:1251974-1252939	False	False
III	1254585	1254615	ID=III:1254585-1254615	False	False
III	1260533	1261378	ID=III:1260533-1261378	False	False
III	1263026	1263056	ID=III:1263026-1263056	False	False
III	1353153	1353184	ID=III:1353153-1353184	False	False
III	1386752	1386776	ID=III:1386752-1386776	False	False
III	1459271	1459296	ID=III:1459271-1459296	False	True
III	1460482	1460507	ID=III:1460482-1460507	False	True
III	1464737	1464759	ID=III:1464737-1464759	False	False
III	1468995	1469019	ID=III:1468995-1469019	False	False
III	1480669	1480760	ID=III:1480669-1480760	True	False
III	1482854	1482945	ID=III:1482854-1482945	True	False
III	1566671	1566693	ID=III:1566671-1566693	False	False
III	1615975	1616006	ID=III:1615975-1616006	False	False
III	1657771	1657797	ID=III:1657771-1657797	False	False
III	1784654	1784680	ID=III:1784654-1784680	False	False
III	1844798	1846238	ID=III:1844798-1846238	False	False
III	1917339	1917909	ID=III:1917339-1917909	False	False
III	1966675	1966698	ID=III:1966675-1966698	False	False
III	1982392	1982416	ID=III:1982392-1982416	False	False
III	2030183	2030209	ID=III:2030183-2030209	False	False
III	2046493	2046522	ID=III:2046493-2046522	False	False
III	2169875	2169900	ID=III:2169875-2169900	False	False
III	2201095	2201318	ID=III:2201095-2201318	False	False
III	2202466	2202497	ID=III:2202466-2202497	False	False
III	2244426	2244451	ID=III:2244426-2244451	False	False
III	2255000	2255543	ID=III:2255000-2255543	False	False
III	2295284	2295305	ID=III:2295284-2295305	False	False
III	2305807	2306237	ID=III:2305807-2306237	False	False
III	2312422	2312444	ID=III:2312422-2312444	True	False
III	2313480	2313502	ID=III:2313480-2313502	True	False
III	2340706	2340742	ID=III:2340706-2340742	False	False
III	2418897	2418927	ID=III:2418897-2418927	False	False
III	2427412	2427606	ID=III:2427412-2427606	False	False
III	2473121	2473143	ID=III:2473121-2473143	False	False
III	2496860	2497024	ID=III:2496860-2497024	False	False
III	2511237	2511371	ID=III:2511237-2511371	False	False
III	2521418	2522178	ID=III:2521418-2522178	False	True
III	2532517	2532546	ID=III:2532517-2532546	False	False
III	2535871	2535894	ID=III:2535871-2535894	False	False
III	2544739	2544764	ID=III:2544739-2544764	False	False
III	2564429	2565185	ID=III:2564429-2565185	False	False
III	2577468	2577773	ID=III:2577468-2577773	False	False
III	2588178	2588201	ID=III:2588178-2588201	False	False
III	2613857	2613886	ID=III:2613857-2613886	False	False
III	2618419	2618441	ID=III:2618419-2618441	False	False
III	2685502	2685531	ID=III:2685502-2685531	False	False
III	2691824	2691847	ID=III:2691824-2691847	False	False
III	2696446	2696897	ID=III:2696446-2696897	False	False
III	2703059	2703083	ID=III:2703059-2703083	False	False
III	2708242	2708360	ID=III:2708242-2708360	False	False
III	2709794	2709823	ID=III:2709794-2709823	False	False
III	2715580	2715605	ID=III:2715580-2715605	False	False
III	2717127	2717292	ID=III:2717127-2717292	False	False
III	2720855	2720877	ID=III:2720855-2720877	False	False
III	2722655	2723414	ID=III:2722655-2723414	False	False
III	2729915	2730060	ID=III:2729915-2730060	False	True
III	2732306	2732792	ID=III:2732306-2732792	False	False
III	2735386	2735410	ID=III:2735386-2735410	False	False
III	2758781	2758806	ID=III:2758781-2758806	False	False
III	2779658	2779683	ID=III:2779658-2779683	False	False
III	2787674	2787696	ID=III:2787674-2787696	False	False
III	2792260	2792282	ID=III:2792260-2792282	False	False
III	2795764	2795906	ID=III:2795764-2795906	False	False
III	2797519	2797824	ID=III:2797519-2797824	False	False
III	2816979	2817918	ID=III:2816979-2817918	False	True
III	2820699	2821334	ID=III:2820699-2821334	False	True
III	2841335	2841508	ID=III:2841335-2841508	False	False
III	2867947	2867972	ID=III:2867947-2867972	False	False
III	2918507	2918534	ID=III:2918507-2918534	False	False
III	2939669	2941495	ID=III:2939669-2941495	False	False
III	2945247	2945927	ID=III:2945247-2945927	False	False
III	2963202	2963481	ID=III:2963202-2963481	False	True
III	2965808	2966118	ID=III:2965808-2966118	False	False
III	2971082	2971105	ID=III:2971082-2971105	False	False
III	2973471	2973494	ID=III:2973471-2973494	False	False
III	3003411	3004223	ID=III:3003411-3004223	False	True
III	3006618	3006641	ID=III:3006618-3006641	False	True
III	3008935	3009695	ID=III:3008935-3009695	False	True
III	3022326	3022355	ID=III:3022326-3022355	False	False
III	3066936	3066959	ID=III:3066936-3066959	False	False
III	3121730	3124180	ID=III:3121730-3124180	False	True
III	3144241	3144266	ID=III:3144241-3144266	False	False
III	3148831	3148857	ID=III:3148831-3148857	False	False
III	3153180	3153203	ID=III:3153180-3153203	False	False
III	3163827	3163851	ID=III:3163827-3163851	False	False
III	3195487	3195509	ID=III:3195487-3195509	False	False
III	3211065	3211091	ID=III:3211065-3211091	False	False
III	3223916	3223938	ID=III:3223916-3223938	False	False
III	3278011	3278035	ID=III:3278011-3278035	False	False
III	3279963	3280722	ID=III:3279963-3280722	False	False
III	3337916	3337938	ID=III:3337916-3337938	False	False
III	3413585	3413607	ID=III:3413585-3413607	False	False
III	3428347	3428742	ID=III:3428347-3428742	False	True
III	3433712	3433885	ID=III:3433712-3433885	False	False
III	3461840	3462795	ID=III:3461840-3462795	False	False
III	3486656	3486935	ID=III:3486656-3486935	False	False
III	3500552	3500578	ID=III:3500552-3500578	False	False
III	3540857	3541046	ID=III:3540857-3541046	False	False
III	3571191	3571216	ID=III:3571191-3571216	False	False
III	3626182	3626204	ID=III:3626182-3626204	False	False
III	3693476	3693501	ID=III:3693476-3693501	False	False
III	3723577	3723600	ID=III:3723577-3723600	False	False
III	3770499	3770676	ID=III:3770499-3770676	False	False
III	3794698	3794723	ID=III:3794698-3794723	False	False
III	3830382	3831166	ID=III:3830382-3831166	False	False
III	3840942	3840963	ID=III:3840942-3840963	False	False
III	3857488	3857524	ID=III:3857488-3857524	False	True
III	3934973	3934998	ID=III:3934973-3934998	False	False
III	3987093	3987695	ID=III:3987093-3987695	False	False
III	4083250	4083275	ID=III:4083250-4083275	False	False
III	4155110	4155134	ID=III:4155110-4155134	False	False
III	4616026	4616077	ID=III:4616026-4616077	False	False
III	4749336	4749402	ID=III:4749336-4749402	True	False
III	4752794	4752817	ID=III:4752794-4752817	True	False
III	4782333	4782359	ID=III:4782333-4782359	False	False
III	4873857	4873879	ID=III:4873857-4873879	False	False
III	4922117	4922302	ID=III:4922117-4922302	False	False
III	4990408	4990434	ID=III:4990408-4990434	False	False
III	5030678	5030766	ID=III:5030678-5030766	False	False
III	5084679	5084901	ID=III:5084679-5084901	True	False
III	5168877	5169300	ID=III:5168877-5169300	False	False
III	5178500	5178522	ID=III:5178500-5178522	False	False
III	5196517	5196540	ID=III:5196517-5196540	False	False
III	5365782	5365805	ID=III:5365782-5365805	False	True
III	5594857	5594879	ID=III:5594857-5594879	False	False
III	5647024	5647102	ID=III:5647024-5647102	False	False
III	5683026	5683050	ID=III:5683026-5683050	False	True
III	5782226	5782247	ID=III:5782226-5782247	False	False
III	5790292	5790313	ID=III:5790292-5790313	False	False
III	6109739	6109762	ID=III:6109739-6109762	False	False
III	6216610	6216641	ID=III:6216610-6216641	False	False
III	6565199	6565221	ID=III:6565199-6565221	False	False
III	6622298	6622320	ID=III:6622298-6622320	False	True
III	6660447	6660470	ID=III:6660447-6660470	False	False
III	6685658	6685734	ID=III:6685658-6685734	True	False
III	6906391	6906416	ID=III:6906391-6906416	False	False
III	6982112	6982178	ID=III:6982112-6982178	True	False
III	6985360	6985426	ID=III:6985360-6985426	False	False
III	7089168	7089194	ID=III:7089168-7089194	False	False
III	7177014	7177036	ID=III:7177014-7177036	False	False
III	7182461	7182483	ID=III:7182461-7182483	False	False
III	7306459	7306718	ID=III:7306459-7306718	True	False
III	7307770	7308029	ID=III:7307770-7308029	True	False
III	7333954	7334224	ID=III:7333954-7334224	False	False
III	7386655	7386875	ID=III:7386655-7386875	False	False
III	7456243	7456266	ID=III:7456243-7456266	False	False
III	7469282	7469492	ID=III:7469282-7469492	False	False
III	7602364	7603322	ID=III:7602364-7603322	True	False
III	7770587	7770821	ID=III:7770587-7770821	True	True
III	7777474	7777500	ID=III:7777474-7777500	False	False
III	8021478	8021545	ID=III:8021478-8021545	False	False
III	8306840	8306978	ID=III:8306840-8306978	False	True
III	8437102	8437126	ID=III:8437102-8437126	False	False
III	8480011	8480037	ID=III:8480011-8480037	False	False
III	8656693	8656716	ID=III:8656693-8656716	False	False
III	8694051	8694074	ID=III:8694051-8694074	False	False
III	8868901	8869080	ID=III:8868901-8869080	False	False
III	8899940	8899963	ID=III:8899940-8899963	False	False
III	8901348	8901414	ID=III:8901348-8901414	False	False
III	8975519	8975541	ID=III:8975519-8975541	False	False
III	9006248	9006436	ID=III:9006248-9006436	False	False
III	9236753	9237502	ID=III:9236753-9237502	False	True
III	9291718	9291975	ID=III:9291718-9291975	False	False
III	9408553	9408685	ID=III:9408553-9408685	False	False
III	9487993	9488019	ID=III:9487993-9488019	False	False
III	9504270	9504455	ID=III:9504270-9504455	False	False
III	9574256	9575641	ID=III:9574256-9575641	True	False
III	9615429	9615451	ID=III:9615429-9615451	False	False
III	9775890	9775914	ID=III:9775890-9775914	False	False
III	9837099	9837124	ID=III:9837099-9837124	False	False
III	10128349	10128373	ID=III:10128349-10128373	False	False
III	10150703	10150727	ID=III:10150703-10150727	False	False
III	10172761	10172789	ID=III:10172761-10172789	False	False
III	10212229	10212253	ID=III:10212229-10212253	False	False
III	10242680	10242853	ID=III:10242680-10242853	False	False
III	10276756	10276785	ID=III:10276756-10276785	False	False
III	10320487	10320578	ID=III:10320487-10320578	False	False
III	10325898	10325920	ID=III:10325898-10325920	False	False
III	10336760	10336784	ID=III:10336760-10336784	False	False
III	10339499	10339685	ID=III:10339499-10339685	False	True
III	10358354	10358552	ID=III:10358354-10358552	False	False
III	10403790	10403815	ID=III:10403790-10403815	False	False
III	10438565	10438591	ID=III:10438565-10438591	False	False
III	10563953	10563977	ID=III:10563953-10563977	False	False
III	10576437	10576599	ID=III:10576437-10576599	False	False
III	10595997	10596021	ID=III:10595997-10596021	False	True
III	10609063	10609085	ID=III:10609063-10609085	False	False
III	10627254	10627458	ID=III:10627254-10627458	False	True
III	10641718	10641743	ID=III:10641718-10641743	False	False
III	10709819	10709844	ID=III:10709819-10709844	False	False
III	10733450	10733475	ID=III:10733450-10733475	False	False
III	10752698	10752724	ID=III:10752698-10752724	False	False
III	10768152	10768177	ID=III:10768152-10768177	False	False
III	10771609	10771633	ID=III:10771609-10771633	False	True
III	10778035	10778059	ID=III:10778035-10778059	False	False
III	10792570	10793081	ID=III:10792570-10793081	True	False
III	10796492	10796574	ID=III:10796492-10796574	False	False
III	10804412	10804634	ID=III:10804412-10804634	False	False
III	10839414	10839439	ID=III:10839414-10839439	False	False
III	10863979	10864003	ID=III:10863979-10864003	False	False
III	10906927	10906949	ID=III:10906927-10906949	False	False
III	10935244	10935336	ID=III:10935244-10935336	False	True
III	10940192	10941402	ID=III:10940192-10941402	False	True
III	10956705	10956736	ID=III:10956705-10956736	False	False
III	10965456	10965487	ID=III:10965456-10965487	False	False
III	10972371	10972395	ID=III:10972371-10972395	False	False
III	11016665	11016689	ID=III:11016665-11016689	False	False
III	11024776	11024805	ID=III:11024776-11024805	False	False
III	11040109	11040131	ID=III:11040109-11040131	False	False
III	11054521	11054546	ID=III:11054521-11054546	False	False
III	11080916	11080947	ID=III:11080916-11080947	False	False
III	11123983	11124178	ID=III:11123983-11124178	False	False
III	11136395	11136419	ID=III:11136395-11136419	False	True
III	11150831	11151592	ID=III:11150831-11151592	False	True
III	11158682	11158925	ID=III:11158682-11158925	False	True
III	11165987	11166746	ID=III:11165987-11166746	False	False
III	11170362	11170485	ID=III:11170362-11170485	False	False
III	11177304	11177366	ID=III:11177304-11177366	True	True
III	11179799	11179919	ID=III:11179799-11179919	False	True
III	11193750	11193775	ID=III:11193750-11193775	False	False
III	11204561	11204592	ID=III:11204561-11204592	False	False
III	11206279	11206304	ID=III:11206279-11206304	False	False
III	11259435	11259464	ID=III:11259435-11259464	False	False
III	11263634	11263665	ID=III:11263634-11263665	False	False
III	11264932	11264956	ID=III:11264932-11264956	False	False
III	11269785	11269807	ID=III:11269785-11269807	False	False
III	11271159	11271181	ID=III:11271159-11271181	False	False
III	11293147	11293601	ID=III:11293147-11293601	False	False
III	11304066	11304325	ID=III:11304066-11304325	False	False
III	11307290	11307424	ID=III:11307290-11307424	False	False
III	11309398	11309767	ID=III:11309398-11309767	False	True
III	11310810	11310835	ID=III:11310810-11310835	False	True
III	11320482	11321242	ID=III:11320482-11321242	False	False
III	11329435	11330382	ID=III:11329435-11330382	False	True
III	11334036	11334158	ID=III:11334036-11334158	False	False
III	11399168	11399197	ID=III:11399168-11399197	False	False
III	11445540	11445667	ID=III:11445540-11445667	False	False
III	11469514	11469714	ID=III:11469514-11469714	False	False
III	11477063	11477092	ID=III:11477063-11477092	False	False
III	11496992	11497016	ID=III:11496992-11497016	False	False
III	11498565	11499401	ID=III:11498565-11499401	False	True
III	11506800	11506826	ID=III:11506800-11506826	False	False
III	11514165	11514190	ID=III:11514165-11514190	False	False
III	11518729	11518920	ID=III:11518729-11518920	False	False
III	11529744	11529775	ID=III:11529744-11529775	False	False
III	11552426	11552854	ID=III:11552426-11552854	False	False
III	11562394	11562423	ID=III:11562394-11562423	False	False
III	11570349	11571108	ID=III:11570349-11571108	False	False
III	11575716	11576475	ID=III:11575716-11576475	False	True
III	11578192	11578263	ID=III:11578192-11578263	False	False
III	11585571	11586023	ID=III:11585571-11586023	False	False
III	11590975	11591000	ID=III:11590975-11591000	False	False
III	11641827	11641850	ID=III:11641827-11641850	False	False
III	11656509	11656538	ID=III:11656509-11656538	False	False
III	11659612	11659637	ID=III:11659612-11659637	False	False
III	11661456	11661485	ID=III:11661456-11661485	False	False
III	11662690	11662714	ID=III:11662690-11662714	False	False
III	11686494	11686517	ID=III:11686494-11686517	False	True
III	11739546	11739689	ID=III:11739546-11739689	False	True
III	11741607	11741636	ID=III:11741607-11741636	False	False
III	11743330	11743361	ID=III:11743330-11743361	False	False
III	11751039	11751063	ID=III:11751039-11751063	False	False
III	11781588	11781611	ID=III:11781588-11781611	False	False
III	11782628	11782651	ID=III:11782628-11782651	False	False
III	11819260	11819286	ID=III:11819260-11819286	False	False
III	11821732	11821761	ID=III:11821732-11821761	False	False
III	11824804	11824826	ID=III:11824804-11824826	False	False
III	11827007	11827771	ID=III:11827007-11827771	False	True
III	11840266	11840393	ID=III:11840266-11840393	False	True
III	11849746	11849777	ID=III:11849746-11849777	False	False
III	11852338	11852374	ID=III:11852338-11852374	False	True
III	11853452	11853478	ID=III:11853452-11853478	False	False
III	11857711	11859043	ID=III:11857711-11859043	False	True
III	11867236	11868156	ID=III:11867236-11868156	False	True
III	11879238	11879263	ID=III:11879238-11879263	False	False
III	11886429	11886455	ID=III:11886429-11886455	False	False
III	11889404	11890079	ID=III:11889404-11890079	False	False
III	11891158	11891282	ID=III:11891158-11891282	False	False
III	11894543	11894569	ID=III:11894543-11894569	False	False
III	11901979	11902002	ID=III:11901979-11902002	False	False
III	11912507	11912528	ID=III:11912507-11912528	False	False
III	11927469	11927493	ID=III:11927469-11927493	False	False
III	11936582	11936608	ID=III:11936582-11936608	False	False
III	11938546	11940349	ID=III:11938546-11940349	False	False
III	11949070	11949175	ID=III:11949070-11949175	False	False
III	11954704	11954758	ID=III:11954704-11954758	False	False
III	11968631	11968660	ID=III:11968631-11968660	False	False
III	11993136	11993162	ID=III:11993136-11993162	False	True
III	12000855	12000886	ID=III:12000855-12000886	False	False
III	12009196	12009356	ID=III:12009196-12009356	False	False
III	12048326	12048350	ID=III:12048326-12048350	False	True
III	12056050	12056809	ID=III:12056050-12056809	False	True
III	12060614	12061537	ID=III:12060614-12061537	False	False
III	12074520	12075019	ID=III:12074520-12075019	False	False
III	12078540	12078661	ID=III:12078540-12078661	False	False
III	12080205	12080229	ID=III:12080205-12080229	False	False
III	12081508	12081530	ID=III:12081508-12081530	False	False
III	12085689	12085714	ID=III:12085689-12085714	False	False
III	12096936	12096960	ID=III:12096936-12096960	False	False
III	12111794	12111816	ID=III:12111794-12111816	False	False
III	12148729	12148758	ID=III:12148729-12148758	False	False
III	12150569	12150593	ID=III:12150569-12150593	False	False
III	12161825	12161963	ID=III:12161825-12161963	False	True
III	12163634	12163702	ID=III:12163634-12163702	False	True
III	12172084	12172109	ID=III:12172084-12172109	False	False
III	12214579	12214671	ID=III:12214579-12214671	False	False
III	12227772	12227798	ID=III:12227772-12227798	False	False
III	12232145	12232180	ID=III:12232145-12232180	False	False
III	12247785	12247808	ID=III:12247785-12247808	False	False
III	12254713	12255473	ID=III:12254713-12255473	False	True
III	12262700	12262724	ID=III:12262700-12262724	False	False
III	12264370	12264578	ID=III:12264370-12264578	False	False
III	12267606	12268366	ID=III:12267606-12268366	False	True
III	12277284	12277381	ID=III:12277284-12277381	False	False
III	12298464	12298816	ID=III:12298464-12298816	False	False
III	12309382	12309411	ID=III:12309382-12309411	False	False
III	12323135	12323158	ID=III:12323135-12323158	False	False
III	12327384	12327415	ID=III:12327384-12327415	False	False
III	12340738	12340761	ID=III:12340738-12340761	False	False
III	12345781	12345807	ID=III:12345781-12345807	False	False
III	12361572	12362899	ID=III:12361572-12362899	False	False
III	12366006	12366031	ID=III:12366006-12366031	False	False
III	12373020	12373045	ID=III:12373020-12373045	False	False
III	12400315	12401280	ID=III:12400315-12401280	False	False
III	12403747	12403770	ID=III:12403747-12403770	False	True
III	12408728	12408752	ID=III:12408728-12408752	False	True
III	12415846	12416606	ID=III:12415846-12416606	False	True
III	12423175	12424048	ID=III:12423175-12424048	False	True
III	12430676	12430700	ID=III:12430676-12430700	False	False
III	12455142	12455252	ID=III:12455142-12455252	False	True
III	12460396	12460977	ID=III:12460396-12460977	False	True
III	12462179	12462204	ID=III:12462179-12462204	False	True
III	12466206	12466229	ID=III:12466206-12466229	False	True
III	12467864	12467889	ID=III:12467864-12467889	False	False
III	12475066	12475236	ID=III:12475066-12475236	False	False
III	12482192	12482220	ID=III:12482192-12482220	False	False
III	12489817	12489843	ID=III:12489817-12489843	False	False
III	12504024	12504784	ID=III:12504024-12504784	False	False
III	12507359	12507382	ID=III:12507359-12507382	False	True
III	12515777	12515808	ID=III:12515777-12515808	False	False
III	12544975	12546644	ID=III:12544975-12546644	False	True
III	12551842	12552081	ID=III:12551842-12552081	False	True
III	12557381	12558956	ID=III:12557381-12558956	False	False
III	12564830	12564855	ID=III:12564830-12564855	False	False
III	12566434	12566457	ID=III:12566434-12566457	False	False
III	12568992	12569018	ID=III:12568992-12569018	False	False
III	12576527	12576553	ID=III:12576527-12576553	False	False
III	12577665	12577696	ID=III:12577665-12577696	False	False
III	12601581	12601604	ID=III:12601581-12601604	False	True
III	12605657	12605679	ID=III:12605657-12605679	False	True
III	12611938	12611961	ID=III:12611938-12611961	False	True
III	12620933	12621840	ID=III:12620933-12621840	False	True
III	12623044	12623296	ID=III:12623044-12623296	False	True
III	12626059	12626088	ID=III:12626059-12626088	False	False
III	12628114	12628569	ID=III:12628114-12628569	False	True
III	12632776	12632799	ID=III:12632776-12632799	False	True
III	12651396	12651420	ID=III:12651396-12651420	False	False
III	12655420	12655448	ID=III:12655420-12655448	False	False
III	12684281	12685123	ID=III:12684281-12685123	False	False
III	12690668	12690691	ID=III:12690668-12690691	False	True
III	12700582	12701842	ID=III:12700582-12701842	False	True
III	12703922	12704067	ID=III:12703922-12704067	False	False
III	12706915	12707361	ID=III:12706915-12707361	False	True
III	12708602	12708664	ID=III:12708602-12708664	False	False
III	12715964	12716715	ID=III:12715964-12716715	False	True
III	12732930	12733632	ID=III:12732930-12733632	False	True
III	12736106	12736251	ID=III:12736106-12736251	False	True
III	12742164	12742187	ID=III:12742164-12742187	False	False
III	12750200	12750225	ID=III:12750200-12750225	False	False
III	12774235	12774260	ID=III:12774235-12774260	False	False
III	12778045	12778070	ID=III:12778045-12778070	False	False
III	12866905	12866929	ID=III:12866905-12866929	False	False
III	12873522	12873544	ID=III:12873522-12873544	False	True
III	12890505	12890754	ID=III:12890505-12890754	False	True
III	12903222	12903981	ID=III:12903222-12903981	False	True
III	12916316	12916339	ID=III:12916316-12916339	False	False
III	12917803	12918439	ID=III:12917803-12918439	False	False
III	12923272	12924069	ID=III:12923272-12924069	False	True
III	12933240	12933706	ID=III:12933240-12933706	False	False
III	12935514	12935539	ID=III:12935514-12935539	False	False
III	12955512	12955542	ID=III:12955512-12955542	False	False
III	12970230	12970487	ID=III:12970230-12970487	False	False
III	12974546	12974575	ID=III:12974546-12974575	False	False
III	12981628	12981653	ID=III:12981628-12981653	False	False
III	12982909	12982963	ID=III:12982909-12982963	False	False
III	13060774	13060798	ID=III:13060774-13060798	False	False
III	13066543	13066770	ID=III:13066543-13066770	False	True
III	13067991	13068016	ID=III:13067991-13068016	False	False
III	13073052	13073076	ID=III:13073052-13073076	False	False
III	13088243	13088305	ID=III:13088243-13088305	False	True
III	13100809	13100943	ID=III:13100809-13100943	False	True
III	13103652	13103675	ID=III:13103652-13103675	False	True
III	13105304	13105329	ID=III:13105304-13105329	False	True
III	13125683	13125707	ID=III:13125683-13125707	False	False
III	13134836	13134967	ID=III:13134836-13134967	False	False
III	13141347	13141371	ID=III:13141347-13141371	False	False
III	13142472	13142501	ID=III:13142472-13142501	False	True
III	13147834	13148287	ID=III:13147834-13148287	False	True
III	13172320	13172343	ID=III:13172320-13172343	False	False
III	13182033	13182947	ID=III:13182033-13182947	False	False
III	13193734	13194492	ID=III:13193734-13194492	False	True
III	13200220	13200428	ID=III:13200220-13200428	False	False
III	13202734	13203484	ID=III:13202734-13203484	False	True
III	13216376	13216568	ID=III:13216376-13216568	False	False
III	13224616	13224638	ID=III:13224616-13224638	False	False
III	13226905	13226929	ID=III:13226905-13226929	False	False
III	13243504	13243546	ID=III:13243504-13243546	False	False
III	13265625	13265746	ID=III:13265625-13265746	False	True
III	13299838	13300046	ID=III:13299838-13300046	False	False
III	13316956	13316995	ID=III:13316956-13316995	False	False
III	13349697	13349830	ID=III:13349697-13349830	False	False
III	13355869	13355923	ID=III:13355869-13355923	False	True
III	13432469	13432493	ID=III:13432469-13432493	False	False
III	13453886	13453922	ID=III:13453886-13453922	False	True
III	13497188	13497366	ID=III:13497188-13497366	False	False
III	13545131	13545154	ID=III:13545131-13545154	False	False
III	13599909	13600136	ID=III:13599909-13600136	False	False
III	13627340	13627547	ID=III:13627340-13627547	False	False
III	13694731	13694859	ID=III:13694731-13694859	False	False
III	13779558	13780115	ID=III:13779558-13780115	False	True
IV	12369	12398	ID=IV:12369-12398	False	False
IV	35480	35509	ID=IV:35480-35509	False	False
IV	178314	178342	ID=IV:178314-178342	False	False
IV	181461	181485	ID=IV:181461-181485	False	False
IV	185364	185573	ID=IV:185364-185573	False	False
IV	186747	186768	ID=IV:186747-186768	False	False
IV	188060	188083	ID=IV:188060-188083	False	False
IV	191472	191673	ID=IV:191472-191673	False	True
IV	203508	203533	ID=IV:203508-203533	False	True
IV	206352	206562	ID=IV:206352-206562	False	False
IV	210202	210225	ID=IV:210202-210225	False	True
IV	211372	211397	ID=IV:211372-211397	False	True
IV	220117	220139	ID=IV:220117-220139	False	False
IV	228164	228403	ID=IV:228164-228403	False	False
IV	244217	244716	ID=IV:244217-244716	False	False
IV	338430	338658	ID=IV:338430-338658	False	False
IV	349341	350164	ID=IV:349341-350164	True	False
IV	409825	409847	ID=IV:409825-409847	False	True
IV	427496	427524	ID=IV:427496-427524	False	False
IV	432404	432426	ID=IV:432404-432426	False	False
IV	437895	437920	ID=IV:437895-437920	False	False
IV	446912	447060	ID=IV:446912-447060	False	True
IV	448829	448889	ID=IV:448829-448889	False	False
IV	454235	454730	ID=IV:454235-454730	False	False
IV	514821	515134	ID=IV:514821-515134	False	True
IV	541743	541772	ID=IV:541743-541772	False	False
IV	579709	579731	ID=IV:579709-579731	False	False
IV	598882	598912	ID=IV:598882-598912	False	False
IV	632870	633324	ID=IV:632870-633324	False	True
IV	650916	650945	ID=IV:650916-650945	False	False
IV	723753	723901	ID=IV:723753-723901	False	True
IV	788862	789204	ID=IV:788862-789204	False	False
IV	810672	811127	ID=IV:810672-811127	False	True
IV	813046	813501	ID=IV:813046-813501	False	True
IV	815727	815751	ID=IV:815727-815751	False	False
IV	819547	819569	ID=IV:819547-819569	False	False
IV	822673	822709	ID=IV:822673-822709	False	True
IV	842819	842848	ID=IV:842819-842848	False	False
IV	852782	852818	ID=IV:852782-852818	False	False
IV	957530	957555	ID=IV:957530-957555	False	False
IV	979646	980406	ID=IV:979646-980406	False	True
IV	984872	985631	ID=IV:984872-985631	False	False
IV	988801	989252	ID=IV:988801-989252	False	False
IV	1025419	1026175	ID=IV:1025419-1026175	False	False
IV	1061850	1062011	ID=IV:1061850-1062011	False	False
IV	1078516	1078664	ID=IV:1078516-1078664	False	True
IV	1083818	1084160	ID=IV:1083818-1084160	False	True
IV	1168292	1168416	ID=IV:1168292-1168416	False	False
IV	1170085	1170114	ID=IV:1170085-1170114	False	False
IV	1188399	1188854	ID=IV:1188399-1188854	False	True
IV	1196296	1196747	ID=IV:1196296-1196747	False	False
IV	1226963	1226985	ID=IV:1226963-1226985	False	False
IV	1289020	1289362	ID=IV:1289020-1289362	False	True
IV	1310252	1310275	ID=IV:1310252-1310275	False	False
IV	1358861	1358883	ID=IV:1358861-1358883	False	False
IV	1388247	1388276	ID=IV:1388247-1388276	False	False
IV	1436056	1436815	ID=IV:1436056-1436815	False	True
IV	1452436	1452462	ID=IV:1452436-1452462	False	False
IV	1492407	1493167	ID=IV:1492407-1493167	False	True
IV	1498220	1498671	ID=IV:1498220-1498671	False	True
IV	1501053	1501813	ID=IV:1501053-1501813	False	True
IV	1504396	1504545	ID=IV:1504396-1504545	False	True
IV	1507531	1508166	ID=IV:1507531-1508166	False	True
IV	1528826	1528999	ID=IV:1528826-1528999	False	False
IV	1538498	1538529	ID=IV:1538498-1538529	False	False
IV	1540333	1541043	ID=IV:1540333-1541043	False	False
IV	1546161	1546190	ID=IV:1546161-1546190	False	False
IV	1575100	1575551	ID=IV:1575100-1575551	False	True
IV	1583337	1583679	ID=IV:1583337-1583679	False	True
IV	1591946	1592008	ID=IV:1591946-1592008	False	True
IV	1603941	1604392	ID=IV:1603941-1604392	False	True
IV	1607730	1610260	ID=IV:1607730-1610260	False	True
IV	1639881	1640250	ID=IV:1639881-1640250	False	True
IV	1642558	1642594	ID=IV:1642558-1642594	False	True
IV	1653066	1653088	ID=IV:1653066-1653088	False	False
IV	1656584	1656606	ID=IV:1656584-1656606	False	True
IV	1665709	1666469	ID=IV:1665709-1666469	False	False
IV	1668932	1669265	ID=IV:1668932-1669265	False	False
IV	1677904	1677927	ID=IV:1677904-1677927	False	False
IV	1691994	1692756	ID=IV:1691994-1692756	False	False
IV	1712620	1713494	ID=IV:1712620-1713494	False	False
IV	1730245	1731005	ID=IV:1730245-1731005	False	True
IV	1732225	1733676	ID=IV:1732225-1733676	False	True
IV	1734962	1734986	ID=IV:1734962-1734986	False	True
IV	1743491	1743916	ID=IV:1743491-1743916	False	True
IV	1755947	1756526	ID=IV:1755947-1756526	False	True
IV	1765643	1765679	ID=IV:1765643-1765679	False	True
IV	1775898	1775921	ID=IV:1775898-1775921	False	False
IV	1842120	1842146	ID=IV:1842120-1842146	False	False
IV	1845765	1845791	ID=IV:1845765-1845791	False	False
IV	1855435	1855584	ID=IV:1855435-1855584	True	True
IV	1861866	1862626	ID=IV:1861866-1862626	False	True
IV	1868758	1868786	ID=IV:1868758-1868786	False	False
IV	1874753	1874776	ID=IV:1874753-1874776	False	True
IV	1906214	1906245	ID=IV:1906214-1906245	False	False
IV	1910428	1910458	ID=IV:1910428-1910458	False	False
IV	1935963	1935996	ID=IV:1935963-1935996	False	False
IV	1941193	1941217	ID=IV:1941193-1941217	False	False
IV	1977046	1977719	ID=IV:1977046-1977719	False	False
IV	1978729	1979774	ID=IV:1978729-1979774	False	False
IV	1989841	1990498	ID=IV:1989841-1990498	False	True
IV	1998580	1999312	ID=IV:1998580-1999312	False	True
IV	2013878	2014223	ID=IV:2013878-2014223	False	True
IV	2024543	2024566	ID=IV:2024543-2024566	False	True
IV	2040532	2040557	ID=IV:2040532-2040557	False	False
IV	2046203	2046962	ID=IV:2046203-2046962	False	False
IV	2054570	2054601	ID=IV:2054570-2054601	False	False
IV	2070140	2070482	ID=IV:2070140-2070482	False	False
IV	2090842	2090868	ID=IV:2090842-2090868	False	False
IV	2101089	2101848	ID=IV:2101089-2101848	False	False
IV	2128407	2128436	ID=IV:2128407-2128436	False	False
IV	2137607	2137631	ID=IV:2137607-2137631	False	False
IV	2143452	2143476	ID=IV:2143452-2143476	False	False
IV	2183675	2183698	ID=IV:2183675-2183698	False	True
IV	2187606	2188058	ID=IV:2187606-2188058	False	True
IV	2207276	2207723	ID=IV:2207276-2207723	False	True
IV	2360659	2361418	ID=IV:2360659-2361418	False	True
IV	2362514	2362536	ID=IV:2362514-2362536	False	True
IV	2363928	2364687	ID=IV:2363928-2364687	False	True
IV	2367545	2367567	ID=IV:2367545-2367567	False	True
IV	2368620	2368643	ID=IV:2368620-2368643	False	False
IV	2371207	2371230	ID=IV:2371207-2371230	False	False
IV	2484514	2484969	ID=IV:2484514-2484969	False	False
IV	2486756	2486781	ID=IV:2486756-2486781	False	False
IV	2502445	2502512	ID=IV:2502445-2502512	False	False
IV	2506082	2506352	ID=IV:2506082-2506352	False	True
IV	2513755	2513777	ID=IV:2513755-2513777	False	False
IV	2515447	2515901	ID=IV:2515447-2515901	False	False
IV	2573695	2573724	ID=IV:2573695-2573724	False	False
IV	2609000	2609758	ID=IV:2609000-2609758	False	True
IV	2629756	2629778	ID=IV:2629756-2629778	False	False
IV	2634891	2634914	ID=IV:2634891-2634914	False	False
IV	2637719	2638480	ID=IV:2637719-2638480	False	True
IV	2639840	2639869	ID=IV:2639840-2639869	False	False
IV	2645831	2646441	ID=IV:2645831-2646441	False	True
IV	2696384	2696406	ID=IV:2696384-2696406	False	True
IV	2699961	2700556	ID=IV:2699961-2700556	False	False
IV	2744955	2745041	ID=IV:2744955-2745041	False	False
IV	2776407	2776438	ID=IV:2776407-2776438	False	False
IV	2777563	2777585	ID=IV:2777563-2777585	False	False
IV	2781166	2781619	ID=IV:2781166-2781619	False	False
IV	2784392	2785125	ID=IV:2784392-2785125	False	True
IV	2790047	2790070	ID=IV:2790047-2790070	False	False
IV	2792520	2793276	ID=IV:2792520-2793276	False	True
IV	2795454	2795532	ID=IV:2795454-2795532	False	False
IV	2819180	2819207	ID=IV:2819180-2819207	False	False
IV	2821613	2821642	ID=IV:2821613-2821642	False	False
IV	2838159	2838190	ID=IV:2838159-2838190	False	False
IV	2841793	2841821	ID=IV:2841793-2841821	False	False
IV	2856682	2856707	ID=IV:2856682-2856707	False	False
IV	2866171	2866199	ID=IV:2866171-2866199	False	False
IV	2873768	2874220	ID=IV:2873768-2874220	False	True
IV	2877348	2879012	ID=IV:2877348-2879012	False	True
IV	2881251	2881386	ID=IV:2881251-2881386	False	True
IV	2885063	2885092	ID=IV:2885063-2885092	False	False
IV	2895405	2895544	ID=IV:2895405-2895544	False	False
IV	2917434	2918228	ID=IV:2917434-2918228	False	False
IV	2920235	2920260	ID=IV:2920235-2920260	False	False
IV	2923460	2923482	ID=IV:2923460-2923482	False	True
IV	2930232	2930686	ID=IV:2930232-2930686	False	False
IV	2934535	2934724	ID=IV:2934535-2934724	False	False
IV	2951235	2951264	ID=IV:2951235-2951264	False	False
IV	2965951	2965973	ID=IV:2965951-2965973	False	False
IV	2967403	2967529	ID=IV:2967403-2967529	False	False
IV	2976566	2976588	ID=IV:2976566-2976588	False	False
IV	2978955	2979064	ID=IV:2978955-2979064	False	False
IV	2980130	2980161	ID=IV:2980130-2980161	False	False
IV	2984228	2984251	ID=IV:2984228-2984251	False	False
IV	2993938	2994781	ID=IV:2993938-2994781	False	False
IV	2995850	2997077	ID=IV:2995850-2997077	False	False
IV	2998270	2998299	ID=IV:2998270-2998299	False	False
IV	3000797	3001559	ID=IV:3000797-3001559	False	True
IV	3010333	3010893	ID=IV:3010333-3010893	False	False
IV	3051701	3051730	ID=IV:3051701-3051730	False	False
IV	3062279	3062314	ID=IV:3062279-3062314	False	False
IV	3068823	3069267	ID=IV:3068823-3069267	False	False
IV	3082253	3082320	ID=IV:3082253-3082320	False	False
IV	3100365	3100389	ID=IV:3100365-3100389	False	False
IV	3101667	3102427	ID=IV:3101667-3102427	False	False
IV	3105473	3106835	ID=IV:3105473-3106835	False	True
IV	3108919	3108949	ID=IV:3108919-3108949	False	False
IV	3110524	3110920	ID=IV:3110524-3110920	False	True
IV	3119994	3120019	ID=IV:3119994-3120019	False	True
IV	3122798	3122823	ID=IV:3122798-3122823	False	False
IV	3125628	3126082	ID=IV:3125628-3126082	False	True
IV	3136054	3136076	ID=IV:3136054-3136076	False	False
IV	3139043	3139069	ID=IV:3139043-3139069	False	False
IV	3144924	3145456	ID=IV:3144924-3145456	False	False
IV	3147518	3148173	ID=IV:3147518-3148173	False	False
IV	3151909	3151932	ID=IV:3151909-3151932	False	False
IV	3153638	3154398	ID=IV:3153638-3154398	False	False
IV	3173307	3173333	ID=IV:3173307-3173333	False	False
IV	3175852	3175874	ID=IV:3175852-3175874	False	False
IV	3186867	3186898	ID=IV:3186867-3186898	False	False
IV	3205566	3209568	ID=IV:3205566-3209568	False	False
IV	3212897	3213035	ID=IV:3212897-3213035	False	False
IV	3221943	3221979	ID=IV:3221943-3221979	False	True
IV	3224124	3224149	ID=IV:3224124-3224149	False	True
IV	3230980	3231261	ID=IV:3230980-3231261	False	False
IV	3233270	3233291	ID=IV:3233270-3233291	False	False
IV	3235057	3235080	ID=IV:3235057-3235080	False	True
IV	3238250	3239832	ID=IV:3238250-3239832	False	True
IV	3248425	3248573	ID=IV:3248425-3248573	False	True
IV	3255499	3255530	ID=IV:3255499-3255530	False	False
IV	3259840	3260276	ID=IV:3259840-3260276	False	False
IV	3262812	3263021	ID=IV:3262812-3263021	False	True
IV	3264135	3264181	ID=IV:3264135-3264181	False	False
IV	3273915	3274947	ID=IV:3273915-3274947	False	False
IV	3283836	3283860	ID=IV:3283836-3283860	False	False
IV	3291571	3291832	ID=IV:3291571-3291832	False	False
IV	3293031	3294023	ID=IV:3293031-3294023	False	False
IV	3301803	3301828	ID=IV:3301803-3301828	False	False
IV	3303395	3303420	ID=IV:3303395-3303420	False	False
IV	3323808	3323831	ID=IV:3323808-3323831	True	False
IV	3368483	3368509	ID=IV:3368483-3368509	False	False
IV	3414379	3414404	ID=IV:3414379-3414404	False	False
IV	3498817	3498878	ID=IV:3498817-3498878	True	False
IV	3525901	3525924	ID=IV:3525901-3525924	False	False
IV	3534332	3534356	ID=IV:3534332-3534356	False	False
IV	3536847	3536872	ID=IV:3536847-3536872	False	False
IV	3560128	3560157	ID=IV:3560128-3560157	False	False
IV	3578800	3579497	ID=IV:3578800-3579497	False	False
IV	3582975	3583835	ID=IV:3582975-3583835	False	True
IV	3718172	3718201	ID=IV:3718172-3718201	False	False
IV	3721097	3721549	ID=IV:3721097-3721549	False	True
IV	3729372	3730129	ID=IV:3729372-3730129	False	False
IV	3743856	3743882	ID=IV:3743856-3743882	False	False
IV	3771211	3771530	ID=IV:3771211-3771530	False	False
IV	3854311	3854335	ID=IV:3854311-3854335	False	False
IV	3933269	3933361	ID=IV:3933269-3933361	False	False
IV	4037223	4037248	ID=IV:4037223-4037248	False	False
IV	4039053	4039986	ID=IV:4039053-4039986	False	False
IV	4041872	4042041	ID=IV:4041872-4042041	False	False
IV	4071331	4071498	ID=IV:4071331-4071498	False	False
IV	4092801	4092837	ID=IV:4092801-4092837	False	True
IV	4194794	4194816	ID=IV:4194794-4194816	False	False
IV	4196418	4196566	ID=IV:4196418-4196566	False	False
IV	4313976	4313999	ID=IV:4313976-4313999	False	False
IV	4348230	4348378	ID=IV:4348230-4348378	False	False
IV	4356087	4356235	ID=IV:4356087-4356235	False	False
IV	4358364	4358464	ID=IV:4358364-4358464	False	False
IV	4395244	4395704	ID=IV:4395244-4395704	False	False
IV	4406789	4406815	ID=IV:4406789-4406815	False	False
IV	4441951	4441975	ID=IV:4441951-4441975	False	False
IV	4450668	4450692	ID=IV:4450668-4450692	False	True
IV	4539400	4539422	ID=IV:4539400-4539422	False	False
IV	4551743	4551765	ID=IV:4551743-4551765	False	False
IV	4695264	4696383	ID=IV:4695264-4696383	False	False
IV	4724082	4724111	ID=IV:4724082-4724111	False	False
IV	4763525	4763548	ID=IV:4763525-4763548	False	False
IV	4765091	4765114	ID=IV:4765091-4765114	False	False
IV	4843818	4843840	ID=IV:4843818-4843840	False	False
IV	4881970	4882119	ID=IV:4881970-4882119	False	False
IV	5011102	5011274	ID=IV:5011102-5011274	False	False
IV	5089904	5090162	ID=IV:5089904-5090162	False	False
IV	5197526	5197549	ID=IV:5197526-5197549	False	False
IV	5210804	5210829	ID=IV:5210804-5210829	False	False
IV	5222706	5222787	ID=IV:5222706-5222787	False	False
IV	5309229	5309456	ID=IV:5309229-5309456	False	False
IV	5359498	5359522	ID=IV:5359498-5359522	False	False
IV	5399010	5399059	ID=IV:5399010-5399059	False	False
IV	5522599	5522680	ID=IV:5522599-5522680	False	False
IV	5702358	5702381	ID=IV:5702358-5702381	False	False
IV	5950086	5950109	ID=IV:5950086-5950109	False	False
IV	5965028	5965056	ID=IV:5965028-5965056	False	False
IV	6089611	6089848	ID=IV:6089611-6089848	False	False
IV	6094682	6094753	ID=IV:6094682-6094753	False	False
IV	6189596	6189621	ID=IV:6189596-6189621	False	False
IV	6210117	6210236	ID=IV:6210117-6210236	False	False
IV	6251732	6251754	ID=IV:6251732-6251754	False	False
IV	6307280	6307381	ID=IV:6307280-6307381	False	False
IV	6320236	6320920	ID=IV:6320236-6320920	True	False
IV	6340363	6340604	ID=IV:6340363-6340604	False	False
IV	6343330	6343353	ID=IV:6343330-6343353	False	False
IV	6350337	6350657	ID=IV:6350337-6350657	False	False
IV	6424053	6424395	ID=IV:6424053-6424395	False	False
IV	6469069	6469755	ID=IV:6469069-6469755	False	False
IV	6474434	6474460	ID=IV:6474434-6474460	False	False
IV	6501366	6501645	ID=IV:6501366-6501645	False	False
IV	6609143	6609164	ID=IV:6609143-6609164	False	False
IV	6661978	6662001	ID=IV:6661978-6662001	False	False
IV	6665805	6666001	ID=IV:6665805-6666001	False	False
IV	6732764	6732787	ID=IV:6732764-6732787	False	False
IV	6763404	6763429	ID=IV:6763404-6763429	False	False
IV	6793743	6793765	ID=IV:6793743-6793765	False	False
IV	6914341	6914657	ID=IV:6914341-6914657	False	False
IV	7239927	7240137	ID=IV:7239927-7240137	False	False
IV	7256475	7256499	ID=IV:7256475-7256499	False	False
IV	7486607	7486628	ID=IV:7486607-7486628	False	False
IV	7920947	7920969	ID=IV:7920947-7920969	False	True
IV	8224564	8224713	ID=IV:8224564-8224713	False	False
IV	8255990	8256214	ID=IV:8255990-8256214	True	False
IV	8258106	8258573	ID=IV:8258106-8258573	False	False
IV	8400153	8400950	ID=IV:8400153-8400950	False	False
IV	8403515	8403538	ID=IV:8403515-8403538	False	False
IV	8434759	8435186	ID=IV:8434759-8435186	False	False
IV	8521499	8521525	ID=IV:8521499-8521525	False	False
IV	8597935	8598582	ID=IV:8597935-8598582	False	False
IV	8747988	8748170	ID=IV:8747988-8748170	False	True
IV	8948273	8948295	ID=IV:8948273-8948295	False	False
IV	9149224	9149249	ID=IV:9149224-9149249	False	False
IV	9172586	9172611	ID=IV:9172586-9172611	False	False
IV	9249233	9249369	ID=IV:9249233-9249369	False	False
IV	9265015	9265348	ID=IV:9265015-9265348	False	False
IV	9405830	9406256	ID=IV:9405830-9406256	False	False
IV	9524177	9524303	ID=IV:9524177-9524303	False	False
IV	9741777	9741802	ID=IV:9741777-9741802	False	False
IV	9769461	9769643	ID=IV:9769461-9769643	False	False
IV	9856629	9856815	ID=IV:9856629-9856815	False	False
IV	10079240	10079269	ID=IV:10079240-10079269	False	False
IV	10116526	10116555	ID=IV:10116526-10116555	False	False
IV	10118419	10118445	ID=IV:10118419-10118445	False	False
IV	10242267	10242290	ID=IV:10242267-10242290	False	False
IV	10462579	10462602	ID=IV:10462579-10462602	False	False
IV	11177000	11177024	ID=IV:11177000-11177024	False	False
IV	11346927	11346951	ID=IV:11346927-11346951	False	False
IV	11497203	11497385	ID=IV:11497203-11497385	False	False
IV	11608886	11609429	ID=IV:11608886-11609429	True	False
IV	11617454	11617997	ID=IV:11617454-11617997	True	False
IV	11681078	11681493	ID=IV:11681078-11681493	False	False
IV	11787379	11787405	ID=IV:11787379-11787405	False	False
IV	11835104	11835129	ID=IV:11835104-11835129	False	False
IV	11861376	11861400	ID=IV:11861376-11861400	False	False
IV	12138288	12138311	ID=IV:12138288-12138311	False	False
IV	12246098	12246147	ID=IV:12246098-12246147	False	False
IV	12375564	12375587	ID=IV:12375564-12375587	False	False
IV	12393160	12393185	ID=IV:12393160-12393185	False	True
IV	12430385	12430764	ID=IV:12430385-12430764	False	False
IV	12490197	12490364	ID=IV:12490197-12490364	False	False
IV	12565106	12565128	ID=IV:12565106-12565128	False	False
IV	12585004	12585065	ID=IV:12585004-12585065	False	False
IV	12615240	12615262	ID=IV:12615240-12615262	False	False
IV	12650990	12651169	ID=IV:12650990-12651169	False	False
IV	12664345	12664367	ID=IV:12664345-12664367	False	False
IV	12703187	12703208	ID=IV:12703187-12703208	False	False
IV	12707332	12707363	ID=IV:12707332-12707363	False	False
IV	12723436	12723465	ID=IV:12723436-12723465	False	False
IV	12732987	12733183	ID=IV:12732987-12733183	False	False
IV	12802842	12802865	ID=IV:12802842-12802865	False	False
IV	12847003	12847777	ID=IV:12847003-12847777	False	False
IV	12852172	12852196	ID=IV:12852172-12852196	False	False
IV	12860879	12860905	ID=IV:12860879-12860905	False	False
IV	12884580	12884776	ID=IV:12884580-12884776	True	False
IV	13037587	13037611	ID=IV:13037587-13037611	False	False
[truncated: 1,000 more rows]
