# Supplementary material for: A low-abundance class of Dicer-dependent siRNAs produced from a variety of features in C. elegans
Source: HighWire-hosted journal article supplement (doi:10.1101/gr.279083.124), 2024-12-01
Supplement: Supplemental_Table_S7.xlsx [file Supplemental_Table_S7.xlsx]

## Sheet: Table S7
Supplemental Table S7. 23H-RNA and miRNA raw sRNA-seq read counts from GFP::RDE-1 co-IPs and cell lysates allowing for 0 or 1-3 A-to-G mismatches to the genome (note that abundant reads from related loci can confound the results).				0 A-to-G edits						1-3 A-to-G edits
Feature ID	Classifier	Feature Name		A-to-G edits	GFP::RDE-1 co-IP rep 1	GFP::RDE-1 co-IP rep 2	input rep 1	input rep 2		A-to-G edits	GFP::RDE-1 co-IP rep 1	GFP::RDE-1 co-IP rep 2	input rep 1	input rep 2		Mean co-IP (1-3 edits)/(all reads)	SD co-IP (1-3 edits)/(all reads)	Mean input (1-3 edits)/(all reads)	SD input (1-3 edits)/(all reads)
TTTGCCGATGTTTCTGAGATGTC	23H-RNA	F43E2.6		0	370696	1407924	4712	6433		1-3	39981	158159	564	646		0.0992	0.0026	0.0991	0.0111
TGTATTAAACGGTAAGGGCCGGC	23H-RNA	mir-5592		0	239416	453522	1794	1926		1-3	3998	8006	34	40		0.0169	0.0007	0.0195	0.0012
AGTGGAGTGGATGACGACGACG	23H-RNA	Y57G11C.1145_hairpin, Y57G11C.51		0	113292	539694	1746	2094		1-3	3766	17254	94	120		0.0316	0.0008	0.0526	0.0022
TTTGCCGATGTTTCTGAGATGT	23H-RNA	F43E2.6		0	105894	287041	839	1145		1-3	11717	32751	97	121		0.101	0.002	0.0996	0.0057
CATCTCAGAAACATCGGCAAATG	23H-RNA	F43E2.6		0	80514	173411	628	633		1-3	42372	97500	337	449		0.3524	0.0107	0.3821	0.0465
AGTGGAGTGGATGACGACGACGA	23H-RNA	Y57G11C.1145_hairpin		0	41406	219686	914	933		1-3	1674	9093	121	30		0.0393	0.0006	0.074	0.0606
TCCCGCATTTTTTGTAGATCAAA	23H-RNA	CELE14B		0	40950	99099	0	819		1-3	7371	6552	0	0		0.1073	0.064	NA	NA
AGACGCGCGCACTCCCAACTCG	23H-RNA	TC5A		0	31304	75207	1075	1247		1-3	688	1634	0	86		0.0214	0.0002	0.0323	0.0456
TCCGCGCGCCGCTATGTTTAACT	23H-RNA	PALTA3		0	31200	68900	300	0		1-3	1700	2000	0	0		0.0399	0.0166	NA	NA
TGATCTACAAAAAATGCGGGAAT	23H-RNA	CELE14B		0	27396	30440	0	0		1-3	8371	3805	0	0		0.1726	0.0869	NA	NA
TCCCGCATTTTTTGTAGATCAA	23H-RNA	CELE14B		0	22649	38269	0	3124		1-3	0	1562	0	0		0.0196	0.0277	NA	NA
CATGTATTAAACGGTAAGGGCC	23H-RNA	mir-5592		0	17266	30610	120	144		1-3	378	742	4	0		0.0225	0.0016	0.0161	0.0228
TTAAACATAGCGGCGCGCGGAAC	23H-RNA	PALTA3		0	16815	29450	190	190		1-3	1710	4560	0	0		0.1132	0.0295	0	0
TATTAAACGGTAAGGGCCGGCTG	23H-RNA	mir-5592		0	14006	31170	108	106		1-3	366	768	6	0		0.0248	0.001	0.0263	0.0372
TGCCGATGTTTCTGAGATGTCTT	23H-RNA	F43E2.6		0	13686	45520	137	198		1-3	698	2407	6	4		0.0494	0.0012	0.0309	0.0157
CATGTATTAAACGGTAAGGGC	23H-RNA	mir-5592		0	13376	24146	120	64		1-3	362	590	4	0		0.0251	0.0018	0.0161	0.0228
ATAACGAGACCGCTGAAAAAGTT	23H-RNA	PAL5A		0	11934	13689	351	702		1-3	0	0	0	0		0	0	0	0
CCGCATTTTTTGTAGATCAAA	23H-RNA	CELE14B		0	11620	10790	2490	830		1-3	830	0	0	0		0.0333	0.0471	0	0
TTTGCCGATGTTTCTGAGATG	23H-RNA	F43E2.6		0	10714	29912	102	143		1-3	1064	3264	15	23		0.0944	0.0057	0.1334	0.0073
CCGCGCGCCGCTATGTTTAACT	23H-RNA	PALTA3		0	10706	18685	0	303		1-3	404	1212	0	0		0.0486	0.0174	NA	NA
TAACGAGACCGCTGAAAAAGTT	23H-RNA	PAL5A		0	10701	21402	0	0		1-3	1845	0	0	0		0.0735	0.104	NA	NA
CGCATTTTTTGTAGATCAAACCG	23H-RNA	CELE14B		0	9469	20052	0	0		1-3	1671	557	0	0		0.0885	0.087	NA	NA
CTCTTACTGTAGTTTTCGCTAAG	23H-RNA	PALTA4		0	9387	29022	105	252		1-3	399	903	0	0		0.0355	0.0075	0	0
TTTGATCTACAAAAAATGCGGG	23H-RNA	CELE14B		0	9060	9815	1510	1510		1-3	0	6040	755	0		0.1905	0.2694	0.1667	0.2357
TTTGCCGATGTTTCTGAGATGTCT	23H-RNA	F43E2.6		0	8657	74328	304	378		1-3	1554	13745	54	106		0.1541	0.0027	0.1849	0.0482
TGCCGATGTTTCTGAGATGTCT	23H-RNA	F43E2.6		0	7296	16578	69	124		1-3	839	1861	12	5		0.102	0.0016	0.0935	0.0773
ATCGACACAAGCGCTACAGTAGT	23H-RNA	CELE1		0	6528	4488	0	0		1-3	0	612	0	0		0.06	0.0849	NA	NA
TGTATTAAACGGTAAGGGCCGG	23H-RNA	mir-5592		0	6396	11102	96	80		1-3	116	250	0	0		0.0199	0.003	0	0
CTTTTTCAGCGGTCTCGTTATGA	23H-RNA	PAL5A		0	6336	15840	1056	0		1-3	0	2112	0	0		0.0588	0.0832	NA	NA
TTCCCGCATTTTTTGTAGATCA	23H-RNA	CELE14B		0	6309	4206	0	0		1-3	0	0	0	0		0	0	NA	NA
TAACGAGACCGCTGAAAAAGTTT	23H-RNA	PAL5A		0	6188	10556	0	364		1-3	364	0	0	0		0.0278	0.0393	NA	NA
CTATCTACACTCTCTGTACCGG	23H-RNA	Unknown_RE2		0	5934	9246	138	69		1-3	0	138	0	0		0.0074	0.0104	0	0
TCCGATTTCTGCCCCCCCAAAATG	23H-RNA	PAL8C		0	5244	14052	28	28		1-3	56	108	0	0		0.0091	0.0021	0	0
CGCGCGCCGCTATGTTTAACTC	23H-RNA	PALTA3		0	5200	9800	0	0		1-3	0	100	0	0		0.0051	0.0071	NA	NA
CTCAAAATAATAAAACTGCGTGG	23H-RNA	PALTA3		0	5074	10664	0	0		1-3	258	172	0	0		0.0321	0.023	NA	NA
TAGCGAAAACTACAGTAATTCTT	23H-RNA	CELE1		0	4688	5567	0	0		1-3	293	293	0	0		0.0544	0.0062	NA	NA
TTAAACGCAGCGGCGCGCGGAAC	23H-RNA	PALTA3		0	4374	8748	0	27		1-3	108	297	0	0		0.0285	0.0062	NA	NA
ACTTTTTCAGCGGTCTCGTTATG	23H-RNA	PAL5A		0	4236	9884	0	0		1-3	0	2118	0	0		0.0882	0.1248	NA	NA
CCGCATTTTTTGTAGATCAAACC	23H-RNA	CELE14B		0	4186	11960	598	0		1-3	0	0	0	0		0	0	NA	NA
CTCAAAATAATAAAACTGCGT	23H-RNA	PALTA3		0	4171	7081	0	97		1-3	97	194	0	0		0.0247	0.0028	NA	NA
CGCGCGCCGCTATGTTTAACT	23H-RNA	PALTA3		0	4080	4488	408	0		1-3	204	0	0	0		0.0238	0.0337	NA	NA
TAAAACTGCGTGGCGTGTACTGC	23H-RNA	PALTA3		0	3796	10585	0	146		1-3	0	73	0	0		0.0034	0.0048	NA	NA
CGCGCGCCGCTATGTTTAACTCG	23H-RNA	PALTA3		0	3744	9024	0	0		1-3	0	96	0	0		0.0053	0.0074	NA	NA
AACGAGACCGCTGAAAAAGTTT	23H-RNA	PAL5A		0	3660	5124	0	732		1-3	0	0	0	0		0	0	NA	NA
TGGCGTGTACTGCAGAAAACCT	23H-RNA	PALTA3		0	3634	4898	0	0		1-3	9322	18802	0	316		0.7564	0.0522	NA	NA
ATAACGAGACCGCTGAAAAAGT	23H-RNA	PAL5A		0	3530	2824	0	706		1-3	0	0	0	0		0	0	NA	NA
ATTTGCCGATGTTTCTGAGATGT	23H-RNA	F43E2.6		0	3449	16127	54	67		1-3	160	554	1	4		0.0388	0.0079	0.0373	0.027
TTCCGCGCGCCGCTATGTTTAAC	23H-RNA	PALTA3		0	3230	6175	0	0		1-3	95	1140	0	0		0.0922	0.09	NA	NA
TGCGTGGCGTGTACTGCAGAAAAC	23H-RNA	PALTA3		0	3140	16799	0	0		1-3	0	0	0	0		0	0	NA	NA
TCACGAGGGACGAGGAAAAGTG	23H-RNA	PAL5A		0	3080	924	0	0		1-3	308	3696	0	0		0.4455	0.5014	NA	NA
CATGTATTAAACGGTAAGGGCCG	23H-RNA	mir-5592		0	2960	5310	46	14		1-3	64	132	0	2		0.0227	0.0022	0.0625	0.0884
TGTATTAAACGGTAAGGGCCG	23H-RNA	mir-5592		0	2782	4622	84	50		1-3	70	80	0	2		0.0208	0.0053	0.0192	0.0272
CTCGGCATTCAGAGGCAACTTCC	23H-RNA	Unknown_RE3		0	2775	3700	0	0		1-3	2257	6142	37	0		0.5363	0.1241	NA	NA
TTAAACGGTAAGGGCCGGCTGG	23H-RNA	mir-5592		0	2718	4462	114	78		1-3	38	68	0	0		0.0144	0.0009	0	0
CGCATTTTTTGTAGATCAAACC	23H-RNA	CELE14B		0	2680	1340	670	0		1-3	0	0	0	0		0	0	NA	NA
TAAACATAGCGGCGCGCGGAACC	23H-RNA	PALTA3		0	2592	4050	0	405		1-3	405	810	0	0		0.1509	0.0223	NA	NA
CTTTTTCAGCGGTCTCGTTATG	23H-RNA	PAL5A		0	2485	19525	0	0		1-3	0	0	0	0		0	0	NA	NA
TACTGTAGCGCTTGTGTCGATT	23H-RNA	CELE1		0	2442	888	0	0		1-3	0	0	0	0		0	0	NA	NA
TCCTTCGATGTCGGCTCTTCC	23H-RNA	F31C3.10, F31C3.9, rrn-3.1, rrn-3.56		0	2314	1302	154	236		1-3	12	2	0	2		0.0033	0.0026	0.0042	0.0059
TGGAGTGGATGACGACGACGATG	23H-RNA	Y57G11C.1145_hairpin		0	2266	14492	50	42		1-3	74	440	2	6		0.0305	0.0015	0.0817	0.0612
ACATCTCAGAAACATCGGCAAAT	23H-RNA	F43E2.6		0	2133	2530	2	15		1-3	1949	3009	9	18		0.5104	0.0465	0.6818	0.1928
TTCCCGCATTTTTTGTAGATC	23H-RNA	CELE14B		0	2130	1420	0	0		1-3	0	0	0	0		0	0	NA	NA
TTTTGGGGGGCAGAAATCGGAA	23H-RNA	PAL8C		0	2034	3474	0	0		1-3	54	72	0	0		0.0231	0.0039	NA	NA
AATCGGAAACTCAAAGACCACA	23H-RNA	Y17D7C.3		0	1975	3693	29	58		1-3	91	151	9	1		0.0417	0.0034	0.1269	0.1555
CGGCCCTTACCGTTTAATACATG	23H-RNA	mir-5592		0	1940	4024	20	16		1-3	36	64	0	0		0.0169	0.0018	0	0
TCCACGGCGGCCGACAATTTCCG	23H-RNA	Unknown_hairpin_RE2		0	1911	1131	0	0		1-3	0	0	0	0		0	0	NA	NA
GTATTAAACGGTAAGGGCCGGC	23H-RNA	mir-5592		0	1874	3192	456	470		1-3	26	80	0	6		0.0191	0.0076	0.0063	0.0089
TACGGTTTGATCTACAAAAAATGC	23H-RNA	CELE14B		0	1848	1540	924	0		1-3	0	0	0	0		0	0	NA	NA
CCGCGCGCCGCTATGTTTAACTC	23H-RNA	PALTA3		0	1767	4092	93	0		1-3	0	1023	0	0		0.1	0.1414	NA	NA
ATCGACACAAGCGCTACAGTAG	23H-RNA	CELE1		0	1760	880	0	0		1-3	0	0	0	0		0	0	NA	NA
ATGTATTAAACGGTAAGGGCC	23H-RNA	mir-5592		0	1714	2490	26	18		1-3	18	40	2	0		0.0131	0.0038	0.0357	0.0505
TGATCTACAAAAAATGCGGGAATT	23H-RNA	CELE14B		0	1698	11320	0	0		1-3	0	566	0	0		0.0238	0.0337	NA	NA
TTTTGGGGGGCAGAAATCGGAAA	23H-RNA	PAL8C		0	1638	3618	0	0		1-3	324	252	0	0		0.1151	0.0707	NA	NA
AGCGAAAACTACAGTAATTCTTT	23H-RNA	CELE1		0	1525	2440	0	305		1-3	0	0	0	0		0	0	NA	NA
TTTTGGGGGGCAGAAATCGGA	23H-RNA	PAL8C		0	1476	3312	0	18		1-3	126	216	0	0		0.0699	0.0123	NA	NA
ATCGTCGTCGTCATCCACTCCAC	23H-RNA	Y57G11C.1145_hairpin		0	1402	1698	2	16		1-3	10	22	0	0		0.0099	0.004	0	0
ATGGCTGCGGCGAGGATGATGTG	23H-RNA	Y57G11C.1145_hairpin		0	1392	7020	34	30		1-3	56	452	0	2		0.0496	0.0154	0.0313	0.0442
AACAACGAAGCTCCGAAATAACG	23H-RNA	PALTTAA1		0	1386	2655	0	90		1-3	0	180	0	0		0.0317	0.0449	NA	NA
AGCGGTCTCGTTATGAAAATCAG	23H-RNA	PAL5A		0	1372	10976	0	0		1-3	2744	15435	0	0		0.6255	0.0582	NA	NA
CATAACGAGACCGCTGAAAAAGT	23H-RNA	PAL5A		0	1368	2394	0	0		1-3	0	0	0	0		0	0	NA	NA
TACCTGATTTTCATAACGAGACC	23H-RNA	PAL5A		0	1350	1125	0	0		1-3	0	0	0	0		0	0	NA	NA
ATTTGCCGATGTTTCTGAGATG	23H-RNA	F43E2.6		0	1318	3534	21	24		1-3	47	123	1	3		0.034	0.0006	0.0783	0.0464
ATTAAACGGTAAGGGCCGGCTGG	23H-RNA	mir-5592		0	1302	3484	36	14		1-3	40	112	0	0		0.0305	0.0009	0	0
ATTAAACGGTAAGGGCCGGCTG	23H-RNA	mir-5592		0	1294	2560	32	20		1-3	34	46	0	0		0.0216	0.0056	0	0
AGACATCTCAGAAACATCGGC	23H-RNA	F43E2.6		0	1292	1795	3	7		1-3	227	465	0	2		0.1776	0.0398	0.1111	0.1571
CATCTCAGAAACATCGGCAAAT	23H-RNA	F43E2.6		0	1249	1824	7	8		1-3	905	1444	12	10		0.431	0.0154	0.5936	0.0538
CGTATATTCTCTATTAGTGCTGC	23H-RNA	Unknown_RE6		0	1240	2170	0	62		1-3	62	0	0	0		0.0238	0.0337	NA	NA
ATCTCAGAAACATCGGCAAATG	23H-RNA	F43E2.6		0	1238	2350	17	14		1-3	500	1070	1	4		0.3003	0.0178	0.1389	0.1179
TATTAAACGGTAAGGGCCGGC	23H-RNA	mir-5592		0	1236	2100	118	110		1-3	42	54	2	2		0.029	0.0055	0.0173	0.0008
TCAGGCCGCCGACATCTCATGGG	23H-RNA	PALTA3		0	1218	3675	0	0		1-3	315	315	0	0		0.1422	0.0895	NA	NA
CTCTTACTGTAGTTTTCGCTA	23H-RNA	PALTA4		0	1134	3717	63	21		1-3	42	210	0	0		0.0446	0.0126	0	0
TGAGAACCCCAAATCTACGGACC	23H-RNA	TC5A		0	1100	924	0	0		1-3	44	88	0	0		0.0627	0.0343	NA	NA
TGGATGATGGCGTGGAAGAAGTT	23H-RNA	Y57G11C.1145_hairpin		0	1098	7976	18	18		1-3	198	1124	2	4		0.1381	0.0207	0.1409	0.0579
TGTAGTTTGTAGTCTAGCAGACC	23H-RNA	TGTAGTTTGTAGTCTAGCAGACC_repeat		0	1078	3724	0	0		1-3	3332	5684	0	0		0.6799	0.107	NA	NA
TCCGCGCGCCGCTATGTTTAAC	23H-RNA	PALTA3		0	1034	3666	282	470		1-3	188	282	0	0		0.1126	0.0583	0	0
AGTGGAGTGGATGACGACGAC	23H-RNA	Y57G11C.1145_hairpin, Y57G11C.51		0	1000	3944	32	42		1-3	70	192	28	14		0.0559	0.0134	0.3583	0.1532
CCACGGCGGCCGACAATTTCCG	23H-RNA	Unknown_hairpin_RE2		0	1000	560	0	0		1-3	0	0	0	0		0	0	NA	NA
TAGATCAAACCGTCATGGGACA	23H-RNA	CELE14B		0	984	1056	16	0		1-3	32	16	0	0		0.0232	0.0117	NA	NA
CCGATGTTTCTGAGATGTCTTC	23H-RNA	F43E2.6		0	971	2272	11	12		1-3	22	58	0	1		0.0235	0.0019	0.0385	0.0544
TCCGATTTCTGCCCCCCCAAA	23H-RNA	PAL8C		0	952	1800	8	8		1-3	12	16	0	0		0.0106	0.0026	0	0
AGACATCTCAGAAACATCGGCA	23H-RNA	F43E2.6		0	923	1385	0	2		1-3	384	674	0	0		0.3106	0.0237	NA	NA
ACATCTCAGAAACATCGGCAAA	23H-RNA	F43E2.6		0	906	1115	2	4		1-3	1186	1466	0	3		0.5675	0.0008	0.2143	0.303
TTGCCGATGTTTCTGAGATGTCT	23H-RNA	F43E2.6		0	871	2771	32	14		1-3	48	112	0	2		0.0455	0.0095	0.0625	0.0884
AGACATCTCAGAAACATCGGCAA	23H-RNA	F43E2.6		0	857	1542	1	6		1-3	979	1746	2	10		0.5321	0.0016	0.6458	0.0295
CATCTCAGAAACATCGGCAAA	23H-RNA	F43E2.6		0	851	1219	4	3		1-3	1268	2236	10	12		0.6228	0.0345	0.7571	0.0606
TTCCGCGCGCCGCTATGTTTAACT	23H-RNA	PALTA3		0	850	4505	0	0		1-3	85	255	0	0		0.0722	0.0264	NA	NA
TATTAAACGGTAAGGGCCGGCT	23H-RNA	mir-5592		0	846	1330	84	30		1-3	18	24	4	6		0.0193	0.0022	0.1061	0.0857
TGAAGACATCTCAGAAACATC	23H-RNA	F43E2.6		0	819	2016	6	4		1-3	1265	3533	8	15		0.6218	0.021	0.6805	0.1542
GTTCTGTGGGCGGGGCCAATCC	23H-RNA	DNA-8-1		0	792	1056	0	88		1-3	0	0	0	0		0	0	NA	NA
GTGGAGTGGATGACGACGACG	23H-RNA	Y57G11C.1145_hairpin, Y57G11C.51		0	771	3486	105	96		1-3	15	72	3	0		0.0197	0.0008	0.0139	0.0196
TTGGTTGGTCCCCGAATTTTGCC	23H-RNA	PALTA3		0	768	1752	0	0		1-3	168	696	0	24		0.2319	0.0741	NA	NA
ATTTGCCGATGTTTCTGAGATGTC	23H-RNA	F43E2.6		0	758	7836	28	22		1-3	53	642	1	3		0.0705	0.0073	0.0772	0.0605
TCCCGCATTTTTCGTAGATCAAA	23H-RNA	CELE14B		0	756	2862	0	54		1-3	0	108	0	0		0.0182	0.0257	NA	NA
AAACAACCCTGAACCAGACGTA	23H-RNA	F31C3.11, rrn-2.1, rrn-2.1_element		0	744	1146	114	90		1-3	26	26	10	2		0.028	0.0082	0.0512	0.0417
ATGAAGAGGCAGGGTCCGGTTGC	23H-RNA	Y57G11C.1145_hairpin		0	731	2240	29	13		1-3	10	60	1	0		0.0198	0.0089	0.0167	0.0236
ATCGTCGTCGTCATCCACTCC	23H-RNA	Y57G11C.1145_hairpin		0	728	840	0	12		1-3	4	12	0	0		0.0098	0.0061	NA	NA
TCCGATTTCTGCCCCCCCAAAAT	23H-RNA	PAL8C		0	728	988	4	0		1-3	0	8	0	0		0.004	0.0057	NA	NA
TGATCTACCTGTTGAACTTGACT	23H-RNA	TIR54TA1		0	714	272	0	0		1-3	0	34	0	0		0.0556	0.0786	NA	NA
TTTCTGAGATGTCTTCACAATTC	23H-RNA	F43E2.6		0	711	1118	2	5		1-3	36	35	0	1		0.0393	0.0126	0.0833	0.1179
TTTTTCAGCGGTCTCGTTATG	23H-RNA	PAL5A		0	710	3905	0	0		1-3	0	0	0	0		0	0	NA	NA
TTTTTCAGCGGTCTCGTTATGA	23H-RNA	PAL5A		0	706	4236	0	0		1-3	0	1412	0	0		0.125	0.1768	NA	NA
TCAGCGGTCTCGTTATGAAAATC	23H-RNA	PAL5A		0	702	7020	0	0		1-3	702	2808	0	0		0.3929	0.1515	NA	NA
ATTCGGGAATTAGTTGTCGACA	23H-RNA	T05E12.8		0	682	1058	5	6		1-3	15	33	1	0		0.0259	0.0062	0.0833	0.1179
TGTGGGCGGGGCCAATCCGGAAT	23H-RNA	H15N14.4, Y24F12A.3, Y24F12A.4		0	680	1960	0	8		1-3	8	8	0	0		0.0078	0.0053	NA	NA
TGGAGTGGATGACGACGACGA	23H-RNA	Y57G11C.1145_hairpin		0	678	3252	90	120		1-3	34	120	22	2		0.0417	0.0086	0.1064	0.1273
TTAAACATAGCGGCGCGCGGAA	23H-RNA	PALTA3		0	665	2375	0	0		1-3	285	0	0	0		0.15	0.2121	NA	NA
CGATGGCTGCGGCGAGGATGATG	23H-RNA	Y57G11C.1145_hairpin		0	664	4048	6	18		1-3	16	200	2	0		0.0353	0.0167	0.125	0.1768
TGCTTTCCTCATCTCTGATCTTT	23H-RNA	F55A4.9, rncs-1		0	661	1086	1	11		1-3	24	69	0	0		0.0474	0.0175	0	0
AGAGTGACAGACATCCGGGACC	23H-RNA	Unknown_RE2		0	650	1550	0	0		1-3	350	150	0	0		0.2191	0.1851	NA	NA
TGTATTAAACGGTAAGGGCCGGCT	23H-RNA	mir-5592		0	646	2430	10	16		1-3	28	48	0	0		0.0305	0.0157	0	0
AGCGAAAACTACAGTAATTCTT	23H-RNA	CELE1		0	644	1610	0	322		1-3	0	0	0	0		0	0	NA	NA
TTTGGCATCGCCCGTGGTATTCC	23H-RNA	T05E12.8		0	630	1380	18	37		1-3	2	10	0	0		0.0052	0.0028	0	0
ACATCTCAGAAACATCGGCAA	23H-RNA	F43E2.6		0	629	693	1	1		1-3	966	1183	4	10		0.6181	0.0176	0.8545	0.0771
TGGATGATGGCGTGGAAGAAGT	23H-RNA	Y57G11C.1145_hairpin		0	624	3494	10	14		1-3	86	854	8	0		0.1588	0.0532	0.2222	0.3143
TCCCGCATTTCTTGTAGATCAAA	23H-RNA	CELE14B		0	615	1260	0	15		1-3	0	0	0	0		0	0	NA	NA
ATGTATTAAACGGTAAGGGCCGG	23H-RNA	mir-5592		0	614	832	6	6		1-3	24	30	0	0		0.0362	0.002	0	0
TTAAACATAGCGGCGCGCGGA	23H-RNA	PALTA3		0	600	1800	0	0		1-3	0	0	0	0		0	0	NA	NA
ACTGCCGCACGGTTTTGAAACTG	23H-RNA	DNA-8-1		0	594	2178	18	27		1-3	18	45	0	0		0.0248	0.0065	0	0
TAAAGTCGATGGACGGCGAGATT	23H-RNA	PALTTAA1		0	581	2905	0	0		1-3	249	332	0	0		0.2013	0.1396	NA	NA
TCATCAGCTCCATCAACACCACC	23H-RNA	C36A4.14		0	578	538	0	1		1-3	7	14	0	0		0.0187	0.0095	NA	NA
TACAACGTGGAGCTAAGACACCC	23H-RNA	F55C9.3		0	576	1104	23	29		1-3	10	34	0	0		0.0235	0.0091	0	0
CCGATTTCTGCCCCCCCAAAATG	23H-RNA	PAL8C		0	572	1136	0	4		1-3	0	20	0	0		0.0087	0.0122	NA	NA
TTAAACGGTAAGGGCCGGCTGGG	23H-RNA	mir-5592		0	566	1554	22	12		1-3	14	42	2	0		0.0252	0.0015	0.0417	0.0589
TAAACATAGCGGCGCGCGGAAC	23H-RNA	PALTA3		0	564	1692	94	0		1-3	0	0	0	0		0	0	NA	NA
TTAAACGGTAAGGGCCGGCTG	23H-RNA	mir-5592		0	536	724	142	54		1-3	14	12	0	0		0.0209	0.0065	0	0
TGAAGACATCTCAGAAACATCGG	23H-RNA	F43E2.6		0	535	1288	7	10		1-3	690	2007	4	5		0.5862	0.0324	0.3485	0.0214
TCCTTCGATGTCGGCTCTTCCTAT	23H-RNA	F31C3.10, F31C3.9, rrn-3.1, rrn-3.56		0	530	260	48	32		1-3	2	4	2	0		0.0095	0.0081	0.02	0.0283
CATCATCCTCGCCGCAGCCATCG	23H-RNA	Y57G11C.1145_hairpin		0	522	668	0	6		1-3	246	206	0	2		0.278	0.0598	NA	NA
TAGCGAAAACTACAGTAAGAACT	23H-RNA	PALTA4		0	518	1406	37	37		1-3	333	444	0	0		0.3157	0.107	0	0
TATCTCGATACCATGTCTCACCC	23H-RNA	Y37E11B.2		0	511	660	9	10		1-3	6	7	0	0		0.0111	0.0008	0	0
CCCTTACGATCCTTCTTATCTGA	23H-RNA	Unknown_IR1		0	510	1071	0	0		1-3	0	51	0	0		0.0227	0.0321	NA	NA
TATCGCACTCTTTGCCCTTCCG	23H-RNA	jmjc-1, T28F2.4		0	510	885	0	20		1-3	5	10	0	0		0.0104	0.001	NA	NA
GGTGGAGTGGATGACGACGACG	23H-RNA	Y57G11C.1145_hairpin		0	508	2509	31	33		1-3	11	69	1	2		0.024	0.0039	0.0442	0.0183
AATTGTGAAGACATCTCAGAAAC	23H-RNA	F43E2.6		0	506	1094	32	36		1-3	37	115	7	2		0.0816	0.0191	0.1161	0.0897
AATCGGAAACTCAAAGACCACAC	23H-RNA	Y17D7C.3		0	499	703	9	7		1-3	19	29	0	0		0.0381	0.0021	0	0
CTCCTCGGTCTTGACGAAATCCC	23H-RNA	C36A4.14		0	499	982	0	7		1-3	5	9	0	0		0.0095	0.0006	NA	NA
TCTCGCCGTCCATCGACTTTAA	23H-RNA	PALTTAA1		0	498	332	0	0		1-3	0	0	0	0		0	0	NA	NA
ATCTACCTGTTGAACTTGACTCC	23H-RNA	TIR54TA1		0	495	1353	0	0		1-3	0	66	0	0		0.0233	0.0329	NA	NA
AAATTGTCGGCCGCCGTGGAAAC	23H-RNA	Unknown_hairpin_RE2		0	494	2052	76	38		1-3	38	152	0	0		0.0702	0.0017	0	0
CGCGCCGCTATGTTTAACTCGC	23H-RNA	PALTA3		0	492	2870	0	0		1-3	0	164	0	0		0.027	0.0382	NA	NA
TTTCTGCAGTACACGCCACGC	23H-RNA	PALTA3		0	492	2132	0	0		1-3	0	0	0	0		0	0	NA	NA
TCTGTCACTCTCTAACTATCTAC	23H-RNA	Unknown_RE2		0	490	686	0	0		1-3	98	0	0	0		0.0833	0.1179	NA	NA
AAGACATCTCAGAAACATCGGC	23H-RNA	F43E2.6		0	486	634	1	2		1-3	79	160	0	3		0.1707	0.0436	0.3	0.4243
TAGACGGTGTGGGTCAACGAGC	23H-RNA	T05E12.8		0	474	864	30	35		1-3	10	7	0	0		0.0143	0.0089	0	0
AAATTGTCGGCCGCCGTGGAAA	23H-RNA	Unknown_hairpin_RE2		0	468	312	39	39		1-3	0	0	0	0		0	0	0	0
AGCCGTGGTCGATGCTGAAAGG	23H-RNA	F55A4.9, rncs-1		0	464	1114	8	0		1-3	20	48	0	0		0.0413	0	NA	NA
ATGTATTAAACGGTAAGGGCCG	23H-RNA	mir-5592		0	464	638	8	4		1-3	6	16	0	0		0.0186	0.0083	0	0
AATACGCCCATTTCTGCAACTG	23H-RNA	DNA-8-1		0	450	630	0	180		1-3	0	0	0	0		0	0	NA	NA
TACTGTAGCGCTTGTGTCGATTT	23H-RNA	CELE1		0	448	2688	0	0		1-3	0	224	0	0		0.0385	0.0544	NA	NA
TTGCTTAACTTGCCAGATCGGAC	23H-RNA	rrn-4_RE		0	448	336	16	0		1-3	16	0	0	0		0.0172	0.0244	NA	NA
TTTGATCTACCTGTTGAACTTG	23H-RNA	TIR54TA1		0	448	1248	0	32		1-3	0	0	0	0		0	0	NA	NA
TTAGAGAGTGACAGACATCCGGG	23H-RNA	Unknown_RE2		0	432	1536	0	0		1-3	0	96	48	0		0.0294	0.0416	NA	NA
CGACGACGATGGCTGCGGCGAGG	23H-RNA	Y57G11C.1145_hairpin		0	420	1568	6	10		1-3	74	270	0	0		0.1483	0.002	0	0
TCGTCGTCGTCATCCACTCCACC	23H-RNA	Y57G11C.1145_hairpin		0	420	570	2	0		1-3	3	21	0	0		0.0213	0.0201	NA	NA
TTTTGTTTCTCTTCCTCTTGCT	23H-RNA	F19B2.5		0	412	698	4	4		1-3	0	0	0	0		0	0	0	0
CCGCCCACAGAACTGTACCTTGC	23H-RNA	H15N14.4, H37A05.4		0	408	789	0	9		1-3	6	12	0	0		0.0147	0.0003	NA	NA
TGAGGTTTTCTGCAGTACACGC	23H-RNA	PALTA3		0	408	1360	0	0		1-3	0	0	0	0		0	0	NA	NA
ATTGTGAAGACATCTCAGAAAC	23H-RNA	F43E2.6		0	407	677	25	35		1-3	25	45	4	3		0.0601	0.0032	0.1084	0.0417
CACGGCAACTCGGTCCAAAACC	23H-RNA	PALNN1		0	406	290	0	0		1-3	58	174	0	0		0.25	0.1768	NA	NA
AACTTCTTCCACGCCATCATCCA	23H-RNA	Y57G11C.1145_hairpin		0	402	238	0	2		1-3	76	36	0	0		0.1452	0.0195	NA	NA
GGTGGAGTGGATGACGACGACGA	23H-RNA	Y57G11C.1145_hairpin		0	401	2093	22	16		1-3	12	89	1	0		0.0349	0.0083	0.0217	0.0307
TTACCTATCGGCTTTAAATGT	23H-RNA	PALTTAA3		0	395	948	0	0		1-3	316	553	0	0		0.4064	0.0538	NA	NA
CAAATCGTCTCTTCCGCGCGCC	23H-RNA	Unknown_RE2		0	392	294	0	0		1-3	0	0	0	0		0	0	NA	NA
TCCCGGATGTCTGTCACTCTCT	23H-RNA	Unknown_RE2		0	392	294	0	0		1-3	0	98	0	0		0.125	0.1768	NA	NA
AAGAACAAGCCGTGGGCAAGCA	23H-RNA	F39E9.7, F55A4.4		0	382	644	6	2		1-3	8	28	0	0		0.0311	0.015	0	0
CCGTGATGGGACAGCCTGACACC	23H-RNA	CELE14B		0	378	1365	0	0		1-3	0	0	0	0		0	0	NA	NA
ATCGTCGTCGTCATCCACTCCA	23H-RNA	Y57G11C.1145_hairpin		0	376	424	12	10		1-3	10	16	0	0		0.0311	0.0074	0	0
TTGCCGATGTTTCTGAGATGTC	23H-RNA	F43E2.6		0	371	1157	9	10		1-3	33	70	0	0		0.0694	0.0174	0	0
AGCGAAAACTACAGTAAGAACT	23H-RNA	PALTA4		0	370	222	0	0		1-3	0	74	0	0		0.125	0.1768	NA	NA
CCGATTTCTGCCCCCCCAAAATGT	23H-RNA	PAL8C		0	368	444	0	0		1-3	8	4	0	0		0.0151	0.0087	NA	NA
TAGATCAAACCGTCATGGGAC	23H-RNA	CELE14B		0	368	376	0	0		1-3	0	16	0	0		0.0204	0.0289	NA	NA
TCGGGGACCAACCAATATCAGGC	23H-RNA	PALTA3		0	360	216	0	0		1-3	180	792	0	0		0.5595	0.3199	NA	NA
CCGATGTTTCTGAGATGTCTTCA	23H-RNA	F43E2.6		0	357	723	15	8		1-3	18	28	1	0		0.0426	0.0076	0.0313	0.0442
GTGGAGTGGATGACGACGACGA	23H-RNA	Y57G11C.1145_hairpin		0	356	1904	70	72		1-3	38	138	148	190		0.082	0.0204	0.702	0.0327
TCGAGAAATGACGAGAAATTCAC	23H-RNA	Unknown_RE4		0	351	429	208	195		1-3	13	13	0	0		0.0326	0.0045	0	0
CGATGTTTCTGAGATGTCTTC	23H-RNA	F43E2.6		0	350	791	2	2		1-3	35	79	0	0		0.0909	0.0001	0	0
TTAGGTTTTCTGCAGTACACGC	23H-RNA	PALTA3		0	348	261	0	0		1-3	0	0	0	0		0	0	NA	NA
AATCGGAAACTCAAAGACCAC	23H-RNA	Y17D7C.3		0	344	728	10	12		1-3	20	29	0	1		0.0466	0.0118	0.0385	0.0544
CGGATGTCTGTCACTCTCTAAC	23H-RNA	Unknown_RE2		0	343	147	0	0		1-3	49	0	0	0		0.0625	0.0884	NA	NA
TGAAATCGTGGGCGGGGCTTAAA	23H-RNA	mir-5550_RE		0	330	1474	0	0		1-3	0	88	0	0		0.0282	0.0398	NA	NA
CGACGATGGCTGCGGCGAGGATG	23H-RNA	Y57G11C.1145_hairpin		0	328	1866	0	2		1-3	0	70	0	0		0.0181	0.0256	NA	NA
TTCTGTGGGCGGGGCCAATCCC	23H-RNA	DNA-8-1		0	328	328	0	0		1-3	0	164	0	0		0.1667	0.2357	NA	NA
TGAAGAGGCAGGGTCCGGTTGC	23H-RNA	Y57G11C.1145_hairpin		0	327	751	2	4		1-3	3	20	0	0		0.0175	0.0119	0	0
TCTGCAACTGCCGCACGGTTTT	23H-RNA	DNA-8-1		0	324	648	0	0		1-3	0	0	0	0		0	0	NA	NA
TCAGGCCGCCGACATCTCATG	23H-RNA	PALTA3		0	322	920	0	0		1-3	0	0	0	0		0	0	NA	NA
TTTTCTGCAGTACACGCCACGC	23H-RNA	PALTA3		0	320	640	0	0		1-3	0	0	0	0		0	0	NA	NA
TCAAAATTTGACGGTGATTTCAA	23H-RNA	PALTTAA1		0	316	237	0	0		1-3	0	237	0	0		0.25	0.3536	NA	NA
TCCGATTTCTGCCCCCCCAAAA	23H-RNA	PAL8C		0	312	632	0	0		1-3	4	8	0	0		0.0126	0.0001	NA	NA
ACTATCTACACTCTCTGTACCGG	23H-RNA	Unknown_RE2		0	310	1178	62	0		1-3	0	62	0	0		0.025	0.0354	NA	NA
AAGAACAAGCCGTGGGCAAGC	23H-RNA	F39E9.7, F55A4.4		0	308	386	4	6		1-3	6	8	4	2		0.0197	0.0008	0.375	0.1768
ATGAAGAGGCAGGGTCCGGTTG	23H-RNA	Y57G11C.1145_hairpin		0	304	422	2	4		1-3	6	16	0	0		0.0279	0.0121	0	0
TGGAGTGGATGACGACGACGAT	23H-RNA	Y57G11C.1145_hairpin		0	304	798	72	96		1-3	10	22	6	0		0.0293	0.0035	0.0385	0.0544
TTCCACGGCGGCCGACAATTTCC	23H-RNA	Unknown_hairpin_RE2		0	304	646	0	0		1-3	0	0	0	0		0	0	NA	NA
GAGTGGGGACTGTCGCTTCGA	23H-RNA	F31C3.7, F31C3.8, rrn-1.1, rrn-1.2		0	302	538	62	66		1-3	4	6	6	2		0.0121	0.0014	0.0588	0.0416
TAGTTTTGATGACTGGATCTACC	23H-RNA	Y116F11A.1		0	301	855	5	18		1-3	2	7	1	1		0.0074	0.0011	0.1096	0.0806
GAAGACACTTTCCAATTACCC	23H-RNA	GAAGACACTTTCCAATTACCC_Repeat, Y116A8C.48		0	300	450	75	0		1-3	0	0	0	0		0	0	NA	NA
TCTTACTGTAGTTTTCGCTAAGA	23H-RNA	PALTA4		0	297	363	33	0		1-3	66	0	0	0		0.0909	0.1286	NA	NA
TTTTAAAACCGTGCGGCAGTTGC	23H-RNA	DNA-8-1		0	296	444	0	0		1-3	0	0	0	0		0	0	NA	NA
TGCAAATGAAATCGTGGGCGGG	23H-RNA	mir-5550_RE		0	294	1113	0	0		1-3	0	21	0	0		0.0093	0.0131	NA	NA
TTCGAGACTCGTCAGATCTGCA	23H-RNA	K02E2.6		0	294	628	1	3		1-3	4	6	0	0		0.0114	0.0028	0	0
AGTGGAGTGGATGACGACGACGG	23H-RNA	Y57G11C.51		0	293	1480	76	3		1-3	4	66	5	0		0.0281	0.0207	0.0309	0.0436
CCATCAGCACCAACACCTCACCC	23H-RNA	C36A4.14		0	292	268	1	3		1-3	19	3	0	0		0.0361	0.0354	0	0
TCAGGCCGCCGACATCTCACGGG	23H-RNA	PALTA3		0	288	288	0	0		1-3	0	48	0	0		0.0714	0.101	NA	NA
TTTTGATCTACCTGTTGAACTTG	23H-RNA	TIR54TA1		0	288	704	0	0		1-3	0	64	0	0		0.0417	0.0589	NA	NA
ATCTCAGAAACATCGGCAAATGG	23H-RNA	F43E2.6		0	280	403	1	3		1-3	266	474	4	2		0.5138	0.0377	0.6	0.2828
TCCGCGCGCCGCTGCGTTTAACT	23H-RNA	PALTA3		0	280	56	0	0		1-3	0	0	0	0		0	0	NA	NA
TCTTCCTGATGTTCTGATCCTTC	23H-RNA	Unknown_IR1		0	280	600	0	0		1-3	40	0	0	0		0.0625	0.0884	NA	NA
TGCCGATGTTTCTGAGATGTC	23H-RNA	F43E2.6		0	280	627	5	7		1-3	25	36	0	0		0.0681	0.0196	0	0
TGAAGACATCTCAGAAACATCG	23H-RNA	F43E2.6		0	276	498	1	5		1-3	328	744	1	4		0.571	0.0396	0.4722	0.0393
TCCGTGTCACATCTGTCCGAA	23H-RNA	PALTTAA3		0	270	54	0	0		1-3	0	0	0	0		0	0	NA	NA
TCTTAGAACCCATATATACCCCC	23H-RNA	Y116F11A.1		0	270	296	0	1		1-3	7	6	0	0		0.0226	0.0038	NA	NA
TGAAGAGGCAGGGTCCGGTTGCG	23H-RNA	Y57G11C.1145_hairpin		0	261	1077	5	4		1-3	0	20	0	0		0.0091	0.0129	0	0
CGTAGGATGTCGGCGGCCTGATA	23H-RNA	PALTA3		0	258	516	0	0		1-3	43	0	0	0		0.0714	0.101	NA	NA
CGCGCCGCTATGTTTAACTCGCA	23H-RNA	PALTA3		0	256	768	0	0		1-3	256	320	0	0		0.3971	0.1456	NA	NA
TCCGATTTCTGCCCCCCAAAATG	23H-RNA	PAL5A		0	255	570	0	0		1-3	0	0	0	0		0	0	NA	NA
CAATAAAAACAATGGACAACTG	23H-RNA	Y59H11AR.6		0	252	498	4	10		1-3	5	26	0	0		0.0345	0.0213	0	0
AAGACATCTCAGAAACATCGGCA	23H-RNA	F43E2.6		0	250	436	0	2		1-3	119	178	0	3		0.3062	0.023	NA	NA
CGCATTTTTCGTAGATCAAACCG	23H-RNA	CELE14B		0	250	200	0	0		1-3	0	0	0	0		0	0	NA	NA
TCATCCTCGCCGCAGCCATCGTC	23H-RNA	Y57G11C.1145_hairpin		0	250	370	0	0		1-3	246	348	0	0		0.4903	0.008	NA	NA
TCCCCGTCAACATAAACTTTTT	23H-RNA	TC5		0	250	310	10	20		1-3	30	0	0	0		0.0536	0.0758	0	0
TCGGAAATTGTCGGCCGCCGTG	23H-RNA	Unknown_hairpin_RE2		0	248	1302	0	0		1-3	0	186	0	0		0.0625	0.0884	NA	NA
CCAAAGGATCACGAGGCTCTTC	23H-RNA	Unknown_IR1		0	246	246	41	0		1-3	0	0	0	82		0	0	0.5	0.7071
AAACCGTGCGGCAGTTGCAGAAA	23H-RNA	DNA-8-1		0	243	729	0	0		1-3	0	0	0	0		0	0	NA	NA
ATTTAAAGCCGATAGGTAACC	23H-RNA	PALTTAA3		0	243	162	0	0		1-3	0	0	0	0		0	0	NA	NA
TGTTTGATACCTGGACTCTTTCC	23H-RNA	E01G4.7		0	241	494	19	13		1-3	0	5	0	0		0.005	0.0071	0	0
CGTGAGATGTCGGCGGCCTGATA	23H-RNA	PALTA3		0	240	1584	0	0		1-3	48	144	0	0		0.125	0.0589	NA	NA
AAACAACCCTGAACCAGACGT	23H-RNA	F31C3.11, rrn-2.1, rrn-2.1_element		0	238	304	46	32		1-3	4	8	0	4		0.0211	0.0064	0.0556	0.0786
CAAGAGGAAGAGAAACAAAAGG	23H-RNA	F19B2.5		0	238	420	0	0		1-3	48	104	0	4		0.1832	0.0217	NA	NA
CGCATTTTTTGTAGATCAACGT	23H-RNA	CELE14B		0	238	476	0	0		1-3	0	0	0	0		0	0	NA	NA
CTCAGGATTTTGAGTGAGGCTCA	23H-RNA	M4.2, puf-4		0	238	609	0	0		1-3	0	14	0	0		0.0112	0.0159	NA	NA
TTTTGTTTCTCTTCCTCTTGCTT	23H-RNA	F19B2.5		0	238	566	0	0		1-3	0	0	0	0		0	0	NA	NA
ATATTTGGAACAGAAGCAAGAGG	23H-RNA	F19B2.5		0	232	1064	2	4		1-3	22	74	0	0		0.0758	0.0153	0	0
CTTTTGTTTCTCTTCCTCTTGCT	23H-RNA	F19B2.5		0	230	420	0	2		1-3	0	0	0	0		0	0	NA	NA
TCCTTCGATGTCGGCTCTTCCT	23H-RNA	F31C3.10, F31C3.9, rrn-3.1, rrn-3.56		0	230	184	58	116		1-3	0	0	0	0		0	0	0	0
CATTTTTGGTAAGCAGAACTGGC	23H-RNA	F31C3.9, rrn-3.1		0	228	266	72	72		1-3	6	2	1	1		0.0166	0.0129	0.0137	0
TACACGAGCTGCGTAAATCGAC	23H-RNA	other		0	220	330	0	0		1-3	165	0	0	0		0.2143	0.303	NA	NA
TTTTTTCTGTATTCTTATTTTTC	23H-RNA	F52G3.8		0	218	501	11	12		1-3	1	1	0	0		0.0033	0.0018	0	0
AGCCTCGTGATCCTTTGGAGCTG	23H-RNA	Unknown_IR1		0	216	513	0	0		1-3	0	0	0	0		0	0	NA	NA
TGCTTTCCTCATCTCTGATCTT	23H-RNA	F55A4.9, rncs-1		0	211	362	0	1		1-3	8	14	0	0		0.0369	0.0005	NA	NA
ATTGTGAAGACATCTCAGAAACA	23H-RNA	F43E2.6		0	207	391	1	3		1-3	43	126	5	4		0.2079	0.0507	0.7024	0.1852
CATGAGATGTCGGCGGCCTGATA	23H-RNA	PALTA3		0	207	644	0	0		1-3	138	897	0	0		0.491	0.1288	NA	NA
AGGATCAGAACATCAGGAAGAGC	23H-RNA	Unknown_IR1		0	205	287	0	0		1-3	0	0	0	0		0	0	NA	NA
AAACCACGAATCCTAACCACTA	23H-RNA	tRNA		0	204	289	0	51		1-3	17	0	0	0		0.0385	0.0544	NA	NA
AACTTCTTCCACGCCATCATCC	23H-RNA	Y57G11C.1145_hairpin		0	204	230	0	0		1-3	40	24	0	0		0.1292	0.0491	NA	NA
TATCTACACTCTCTGTACCGG	23H-RNA	Unknown_RE2		0	204	1156	0	136		1-3	0	0	0	0		0	0	NA	NA
TCCGATCTGGCAAGTTAAGCAA	23H-RNA	rrn-4_RE		0	204	748	85	51		1-3	0	0	0	0		0	0	0	0
ATTAAACGGTAAGGGCCGGCT	23H-RNA	mir-5592		0	202	416	6	0		1-3	8	6	0	0		0.0262	0.0169	NA	NA
CACGGAGTTAAATTTGAATTTTT	23H-RNA	Y69A2AR.16_hairpin		0	200	478	2	8		1-3	4	22	0	0		0.0318	0.0172	0	0
CCACGGCGGCCGACAATTTCCGA	23H-RNA	Unknown_hairpin_RE2		0	200	360	0	0		1-3	0	0	0	0		0	0	NA	NA
TTTGATCTACGAAAAATGCGGGA	23H-RNA	CELE14B		0	200	250	0	0		1-3	0	0	0	0		0	0	NA	NA
CCGGATGTCTGTCACTCTCTAAC	23H-RNA	Unknown_RE2		0	196	588	0	0		1-3	49	0	0	0		0.1	0.1414	NA	NA
TCCACGGCGGCCGACAATTTCC	23H-RNA	Unknown_hairpin_RE2		0	195	897	0	0		1-3	0	39	0	0		0.0208	0.0295	NA	NA
TTCCGCGCGCCGCTATGTTTA	23H-RNA	PALTA3		0	194	388	0	0		1-3	0	0	0	0		0	0	NA	NA
CCGCCCACAGTTCTGTACCTTGC	23H-RNA	Y24F12A.3, Y24F12A.4		0	190	220	0	0		1-3	2	0	0	0		0.0052	0.0074	NA	NA
CGGAAATTCGTTGATTGAGACA	23H-RNA	other		0	190	361	0	0		1-3	38	95	0	0		0.1875	0.0295	NA	NA
GATGATGGCGTGGAAGAAGTTGA	23H-RNA	Y57G11C.1145_hairpin		0	190	1344	58	152		1-3	124	854	70	104		0.3917	0.0045	0.4766	0.0994
CGGCGGCCGACAATTTCCGAGT	23H-RNA	Unknown_hairpin_RE2		0	189	378	0	0		1-3	0	0	0	0		0	0	NA	NA
AGCACTAATAGAGAATATACGGT	23H-RNA	Unknown_RE6		0	183	915	0	0		1-3	0	0	0	0		0	0	NA	NA
CGGCGCGCGGAACCCATGAGATG	23H-RNA	PALTA3		0	180	1540	40	0		1-3	200	680	0	0		0.4163	0.1556	NA	NA
CGGCTCTTCGAGCGCGTCTTCTT	23H-RNA	ChrIII_hairpin1		0	180	298	6	8		1-3	0	2	0	0		0.0033	0.0047	0	0
ATTTGCCGATGTTTCTGAGAT	23H-RNA	F43E2.6		0	177	674	7	12		1-3	5	14	0	0		0.0239	0.005	0	0
CATCGTCGTCGTCATCCACTCCA	23H-RNA	Y57G11C.1145_hairpin		0	176	206	0	0		1-3	6	6	0	0		0.0306	0.0033	NA	NA
AACTGCCGCACGGTTTCGAAACT	23H-RNA	DNA-8-1		0	175	161	0	0		1-3	0	0	0	0		0	0	NA	NA
TCCCACGATTTCATTTGCACTG	23H-RNA	Unknown_RE7		0	175	322	0	0		1-3	0	0	0	0		0	0	NA	NA
CGTATTGCAAGCCACGGTTCTGT	23H-RNA	DNA-8-1		0	172	258	0	0		1-3	0	516	0	0		0.3333	0.4714	NA	NA
AATTGTGAAGACATCTCAGAAA	23H-RNA	F43E2.6		0	171	286	5	5		1-3	15	18	0	0		0.0699	0.0152	0	0
ATAGAGCGAGAATTAACAAGAA	23H-RNA	DNA-8-1		0	170	102	0	0		1-3	0	0	0	0		0	0	NA	NA
CGGCCCTTACCGTTTAATACA	23H-RNA	mir-5592		0	170	262	6	10		1-3	6	4	0	0		0.0246	0.0135	0	0
TCTTACTGTAGTTTTCGCTAAG	23H-RNA	PALTA4		0	170	238	0	0		1-3	136	34	0	0		0.2847	0.2259	NA	NA
TTCTTACTGTAGTTTTCGCTAAG	23H-RNA	PALTA4		0	170	918	68	0		1-3	34	680	0	0		0.2961	0.183	NA	NA
TTGAAGAATTTGAGTGAGGCTGA	23H-RNA	M4.2, puf-4		0	170	85	0	0		1-3	17	0	0	0		0.0455	0.0643	NA	NA
AAACAACCCTGAACCAGACGTAC	23H-RNA	F31C3.11, rrn-2.1		0	169	297	13	15		1-3	7	16	0	0		0.0454	0.008	0	0
TACGGGAAAAGCAGAGAGGCCA	23H-RNA	F39E9.7		0	169	256	4	1		1-3	9	14	0	1		0.0512	0.0009	0.25	0.3536
CTGTCAATCTATTTTTCGTCTGT	23H-RNA	CTGTCAATCTATTTTTCGTCTGT_Repeat		0	168	336	0	56		1-3	0	0	0	0		0	0	NA	NA
TTGTGAAGACATCTCAGAAAC	23H-RNA	F43E2.6		0	168	237	4	5		1-3	18	19	0	0		0.0855	0.0159	0	0
TCTCGCCGTCCATCGACTTTAAA	23H-RNA	PALTTAA1		0	166	1162	0	0		1-3	83	332	0	0		0.2778	0.0786	NA	NA
AATTTTGCCTTTTCCCCGTGAGT	23H-RNA	PALTA3		0	165	198	66	0		1-3	0	0	0	0		0	0	NA	NA
AAAGGATCACGAGGCTCTTCCTG	23H-RNA	Unknown_IR1		0	164	492	0	0		1-3	0	0	0	0		0	0	NA	NA
AAGAGCCTCGTGATCCTTTGG	23H-RNA	Unknown_IR1		0	164	246	0	0		1-3	41	41	0	0		0.1714	0.0404	NA	NA
AAGGATCGATTCATAAATTTTGA	23H-RNA	AAGGATCGATTCATAAATTTTGA_Repeat		0	162	621	18	9		1-3	0	0	0	0		0	0	0	0
AAGAGCCTCGTGATCCTTTGGAG	23H-RNA	Unknown_IR1		0	156	78	0	0		1-3	0	39	0	0		0.1667	0.2357	NA	NA
CCAAAGGATCACGAGGCTCTTCC	23H-RNA	Unknown_IR1		0	156	390	0	0		1-3	0	0	0	0		0	0	NA	NA
CGGCCCTTACCGTTTAATACAT	23H-RNA	mir-5592		0	154	164	12	8		1-3	0	0	0	0		0	0	0	0
CACTAATAGGGAACGTGAGCT	23H-RNA	F31C3.10, F31C3.9, rrn-3.1, rrn-3.56		0	150	162	40	48		1-3	6	4	4	0		0.0313	0.0102	0.0455	0.0643
CTGTTCTGCTCTCTCTTTCAGC	23H-RNA	F55A4.9, rncs-1		0	148	524	0	4		1-3	0	0	0	0		0	0	NA	NA
AGTAATATACCGCTACACCAACC	23H-RNA	ChrII_intergenic1		0	147	165	0	0		1-3	1	6	0	0		0.0209	0.02	NA	NA
TCAGGCCGCCGACATCTCATGGGT	23H-RNA	PALTA3		0	147	336	0	0		1-3	42	147	0	0		0.2633	0.0581	NA	NA
ATGATGGCGTGGAAGAAGTTGA	23H-RNA	Y57G11C.1145_hairpin		0	146	454	6	18		1-3	204	648	8	16		0.5854	0.0037	0.521	0.0713
TTTTGTTTCTCTTCCTCTTGCTTC	23H-RNA	F19B2.5		0	146	504	0	6		1-3	0	0	0	0		0	0	NA	NA
AAGGCGCGCTCGAAGAGCCGAGA	23H-RNA	ChrIII_hairpin1		0	145	243	1	3		1-3	40	38	0	0		0.1757	0.0573	0	0
ACGGCAACTCGGTCCAAAACCA	23H-RNA	PALNN1		0	145	116	0	0		1-3	0	87	0	0		0.2143	0.303	NA	NA
CCCGCGGGTGATGACAGAAACGG	23H-RNA	dnj-27_element		0	144	360	0	0		1-3	24	0	0	0		0.0714	0.101	NA	NA
TCGTCGTCATCCACTCCACCGA	23H-RNA	Y57G11C.1145_hairpin		0	144	115	1	1		1-3	1	0	0	0		0.0034	0.0049	0	0
TGGATGATGGCGTGGAAGAAG	23H-RNA	Y57G11C.1145_hairpin		0	144	376	0	4		1-3	30	78	4	2		0.1721	0.0004	0.6667	0.4714
ATTCTCTCGTAGAACGTGTCGCT	23H-RNA	F55A4.9, rncs-1		0	139	289	0	2		1-3	26	85	0	0		0.1924	0.0493	NA	NA
TGCCGATGTTTCTGAGATGTCTTC	23H-RNA	F43E2.6		0	139	1386	4	2		1-3	5	114	0	1		0.0554	0.0292	0.1667	0.2357
TTACGAAGTGGGATTGGAAAATC	23H-RNA	F52G3.8		0	139	289	3	4		1-3	3	5	0	0		0.0191	0.0029	0	0
TCGGGGGATGTCCAATTGGGGG	23H-RNA	DNA-8-1		0	138	207	0	0		1-3	0	69	0	0		0.125	0.1768	NA	NA
CGACCGGACGCCGATTTGTACAG	23H-RNA	Unknown_hairpin_RE2		0	136	510	0	0		1-3	0	0	0	0		0	0	NA	NA
AGAGTGACAGACATCCGGGACCC	23H-RNA	Unknown_RE2		0	132	220	0	0		1-3	0	0	0	44		0	0	NA	NA
GATTACGTCCCTGCCCTTTGT	23H-RNA	F31C3.7, F31C3.8, rrn-1.1, rrn-1.2		0	130	138	18	68		1-3	2	0	0	0		0.0076	0.0107	0	0
TCCCGCATTTTTGTAGATCACA	23H-RNA	CELE14B		0	130	375	0	0		1-3	15	5	0	0		0.0583	0.0638	NA	NA
TCAGGCCGCCGACATCCTACGGG	23H-RNA	PALTA3		0	129	344	0	0		1-3	129	0	0	0		0.25	0.3536	NA	NA
TTGCCGATGTTTCTGAGATGT	23H-RNA	F43E2.6		0	129	360	2	1		1-3	16	21	0	0		0.0827	0.0391	0	0
ATGGCTGCGGCGAGGATGATG	23H-RNA	Y57G11C.1145_hairpin		0	128	372	0	4		1-3	6	48	0	0		0.0795	0.0492	NA	NA
TCCACGGCGGCCGACAATTTC	23H-RNA	Unknown_hairpin_RE2		0	126	420	0	0		1-3	0	0	0	0		0	0	NA	NA
CCTCATACCGCGTATCTATTCA	23H-RNA	F47E1.18, linc-22		0	125	75	0	0		1-3	0	0	0	0		0	0	NA	NA
GTGTAACAATCTATTTTTTCGT	23H-RNA	GTGTAACAATCTATTTTTTCGT_repeat		0	124	124	0	0		1-3	0	0	62	372		0	0	1	0
AACCGGACCCTGCCTCTTCATC	23H-RNA	Y57G11C.1145_hairpin		0	122	366	6	10		1-3	88	172	0	0		0.3694	0.0702	0	0
AAATTGTCGGCCGCCGTGGAA	23H-RNA	Unknown_hairpin_RE2		0	120	200	40	0		1-3	0	0	0	0		0	0	NA	NA
AATTGTGAAGACATCTCAGAA	23H-RNA	F43E2.6		0	120	136	6	0		1-3	5	8	0	0		0.0478	0.011	NA	NA
AAACCACGAATCCTAACCACTAG	23H-RNA	tRNA		0	119	136	0	34		1-3	0	0	0	0		0	0	NA	NA
TCCGGTTCAGAGCAGATGACA	23H-RNA	Y17D7C.3		0	119	296	19	16		1-3	2	5	9	7		0.0166	0.0001	0.3129	0.0121
CATCGTCGTCGTCATCCACTCC	23H-RNA	Y57G11C.1145_hairpin		0	118	266	0	0		1-3	0	2	0	0		0.0037	0.0053	NA	NA
CGGAGCTCGGTTGTGTACGACC	23H-RNA	F49B2.3, Y116A8B.1		0	118	210	0	0		1-3	2	8	0	0		0.0267	0.0142	NA	NA
CTCCTCGGTCTTGACGAAATCC	23H-RNA	C36A4.14		0	117	244	0	1		1-3	3	4	0	0		0.0206	0.0063	NA	NA
AGCCGTGGTCGATGCTGAAAGGT	23H-RNA	F55A4.9, rncs-1		0	116	317	0	3		1-3	2	7	0	0		0.0193	0.0033	NA	NA
GATGATGGCGTGGAAGAAGTTG	23H-RNA	Y57G11C.1145_hairpin		0	116	346	26	90		1-3	32	308	12	28		0.3436	0.1801	0.2765	0.0555
TTAGATACCGTACCCCGAAAACT	23H-RNA	ChrIII_hairpin2		0	116	186	0	0		1-3	0	2	0	0		0.0053	0.0075	NA	NA
TTCGCTCTCGATTTCGCATGCCG	23H-RNA	dnj-27_element		0	112	271	1	1		1-3	7	14	0	0		0.054	0.0069	0	0
AAAAGTTTATGTTGACGGGGAA	23H-RNA	TC5		0	110	220	10	0		1-3	0	50	0	0		0.0926	0.1309	NA	NA
GTCGTCGTCATCCACTCCACCGA	23H-RNA	Y57G11C.1145_hairpin		0	110	154	0	0		1-3	3	5	0	0		0.029	0.0035	NA	NA
TGTGGATGATGGCGTGGAAGAAG	23H-RNA	Y57G11C.1145_hairpin		0	110	826	4	4		1-3	48	282	0	2		0.2792	0.0348	0.1667	0.2357
TTCGGACAGATGTGACACGGA	23H-RNA	PALTTAA3		0	110	352	0	0		1-3	0	0	0	0		0	0	NA	NA
TATCTCGATACCATGTCTCACC	23H-RNA	Y37E11B.2		0	109	130	1	0		1-3	0	7	0	0		0.0255	0.0361	NA	NA
CCTTACGATCCTTCTTATCTGA	23H-RNA	Unknown_IR1		0	108	270	0	0		1-3	0	0	0	0		0	0	NA	NA
TTTCCTCATCTCTGATCTTTTCC	23H-RNA	F55A4.9, rncs-1		0	107	282	0	4		1-3	3	14	0	0		0.0373	0.0142	NA	NA
ATGATTTATTGTTCCCGTAAT	23H-RNA	PALTA4		0	106	159	0	0		1-3	0	0	0	0		0	0	NA	NA
CAAGTTCAACAGGTAGATCAAAA	23H-RNA	TIR54TA1		0	105	210	0	35		1-3	0	0	0	0		0	0	NA	NA
CTTAGGTCACTGGTTCGAATCC	23H-RNA	other		0	105	255	15	0		1-3	0	30	0	0		0.0526	0.0744	NA	NA
GCCGATGTTTCTGAGATGTCTTC	23H-RNA	F43E2.6		0	104	321	2	1		1-3	5	17	0	0		0.0481	0.0031	0	0
TCGTCGTCGTCATCCACTCCAC	23H-RNA	Y57G11C.1145_hairpin		0	104	166	0	6		1-3	0	2	0	0		0.006	0.0084	NA	NA
TCTCTCTTCTCGGCTCTTCGAGC	23H-RNA	ChrIII_hairpin1		0	104	220	2	0		1-3	0	0	0	0		0	0	NA	NA
AGAACGTGTCGCTTCGTCATCTG	23H-RNA	F55A4.9, rncs-1		0	102	536	0	2		1-3	82	164	2	0		0.34	0.1495	0.5	0.7071
AGAGTGACAGACATCCGGGAC	23H-RNA	Unknown_RE2		0	102	408	0	0		1-3	0	0	0	0		0	0	NA	NA
ATAGAGCGAGAATTAACAAGA	23H-RNA	DNA-8-1		0	102	306	0	0		1-3	68	0	0	0		0.2	0.2828	NA	NA
ATTCCACTTGGGGTAAATTCGCC	23H-RNA	C36A4.14		0	102	181	2	1		1-3	2	2	0	0		0.0151	0.0059	0	0
ATTCGGGAATTAGTTGTCGAC	23H-RNA	T05E12.8		0	101	128	2	5		1-3	2	4	0	0		0.0249	0.0077	0	0
TCTCTTCAGCTGACTACACTCT	23H-RNA	rft-2, Y47D7A.14_IR, Y47D7A.14_IR_element		0	100	228	4	0		1-3	0	12	0	0		0.025	0.0354	NA	NA
AACTGCCGCACGGTTTTGAAACT	23H-RNA	DNA-8-1		0	99	243	0	0		1-3	0	9	0	0		0.0179	0.0253	NA	NA
ATCGACACAAGCGCTACAGTAGC	23H-RNA	CELE1		0	98	28	0	0		1-3	0	56	0	0		0.3333	0.4714	NA	NA
GAGTGGATGACGACGACGATGGC	23H-RNA	Y57G11C.1145_hairpin		0	98	314	12	16		1-3	2	26	0	0		0.0482	0.0399	0	0
TCATGATTTATTGTTCCCGTAAT	23H-RNA	PALTA4		0	98	245	0	0		1-3	49	0	0	0		0.1667	0.2357	NA	NA
ACGTGTCGCTTCGTCATCTGATG	23H-RNA	F55A4.9, rncs-1		0	96	514	8	4		1-3	2	38	0	0		0.0446	0.0342	0	0
AGTGGATGACGACGACGATGGCT	23H-RNA	Y57G11C.1145_hairpin		0	96	470	0	6		1-3	4	6	0	0		0.0263	0.0194	NA	NA
AGTTCAACAGGTAGATCAAAAA	23H-RNA	TIR54TA1		0	96	64	0	0		1-3	0	0	0	0		0	0	NA	NA
GAAGGCGCGCTCGAAGAGCCGAGA	23H-RNA	ChrIII_hairpin1		0	96	296	0	0		1-3	29	59	0	0		0.1991	0.0465	NA	NA
AAAACCACGAATCCTAACCACT	23H-RNA	tRNA		0	95	513	0	0		1-3	19	0	0	0		0.0833	0.1179	NA	NA
AAACCACGAATCCTAACCACT	23H-RNA	tRNA		0	95	133	0	0		1-3	19	0	0	0		0.0833	0.1179	NA	NA
ATAGCGGCGCGCGGAACCCATG	23H-RNA	PALTA3		0	95	76	0	0		1-3	0	0	19	0		0	0	NA	NA
ATCCTCGCCGCAGCCATCGTCGT	23H-RNA	Y57G11C.1145_hairpin		0	94	102	0	0		1-3	2	0	0	0		0.0104	0.0147	NA	NA
CCAAGCGGACTGGAGCACATTGG	23H-RNA	F55A4.9, rncs-1		0	94	322	4	2		1-3	26	76	0	2		0.2038	0.0182	0.25	0.3536
TCCGAACAAAAGAGTAACTATT	23H-RNA	other		0	94	470	0	47		1-3	47	47	0	0		0.2121	0.1714	NA	NA
ATATAGTGACTCTGGCCGTTCA	23H-RNA	ATATAGTGACTCTGGCCGTTCA_repeat		0	92	207	0	46		1-3	46	0	0	0		0.1667	0.2357	NA	NA
ACTGCCGCACGGTTTTGAAAC	23H-RNA	DNA-8-1		0	90	252	0	0		1-3	9	0	0	0		0.0455	0.0643	NA	NA
ATCTCAGAAACATCGGCAAAT	23H-RNA	F43E2.6		0	90	160	3	4		1-3	134	330	3	5		0.6358	0.0532	0.5278	0.0393
CAACGTCTCGGCTAGCCACCT	23H-RNA	T05E12.8		0	90	181	0	6		1-3	2	5	0	0		0.0243	0.0036	NA	NA
TGTGGATGATGGCGTGGAAGA	23H-RNA	Y57G11C.1145_hairpin		0	90	410	0	4		1-3	2	18	0	0		0.0319	0.0144	NA	NA
TCTCGTAGAACGTGTCGCTTCG	23H-RNA	F55A4.9, rncs-1		0	89	131	0	0		1-3	15	24	0	0		0.1495	0.0075	NA	NA
AGCTAGCTTCACAACAATTGACC	23H-RNA	W03D2.15		0	88	105	0	1		1-3	0	3	0	0		0.0139	0.0196	NA	NA
ATCTACATGTGATCTACGCGAAT	23H-RNA	pcp-4, Unknown_RE8, Y116F11B.3, Y15E3A.3, Y6B3B.7, Y6B3B.9		0	88	121	0	0		1-3	0	0	0	0		0	0	NA	NA
CACGGAGTTAAATTTGAATTTT	23H-RNA	Y69A2AR.16_hairpin		0	88	114	0	0		1-3	2	6	0	4		0.0361	0.0196	NA	NA
CCCGCCCACGATTTCATTTGC	23H-RNA	mir-5550_RE		0	88	66	0	0		1-3	0	0	0	0		0	0	NA	NA
ACATCTCAGAAACATCGGCAAATG	23H-RNA	F43E2.6		0	87	473	0	3		1-3	93	470	4	2		0.5075	0.0129	0.7	0.4243
TACGTCACAACTGTATTAAAAT	23H-RNA	TC8		0	87	145	0	29		1-3	29	0	0	0		0.125	0.1768	NA	NA
TCACGGCAACTCGGTCCAAAACC	23H-RNA	PALNN1		0	87	58	0	0		1-3	0	58	0	0		0.25	0.3536	NA	NA
TGTCCCATATCGGTTTGATCTCC	23H-RNA	dnj-27_element		0	87	267	6	0		1-3	0	0	0	0		0	0	NA	NA
ACGTGTTCCAGCATTCTTCGAC	23H-RNA	Y37E3.30		0	86	134	7	10		1-3	1	0	0	0		0.0057	0.0081	0	0
CTGATCTCTCTTCTCGGCTCTT	23H-RNA	ChrIII_hairpin1		0	86	130	4	0		1-3	2	0	0	0		0.0114	0.0161	NA	NA
GCCCTTACCGTTTAATACATG	23H-RNA	mir-5592		0	86	68	20	16		1-3	0	0	0	0		0	0	0	0
TCAACAGACTGATGGACGATG	23H-RNA	C36A4.14		0	86	149	7	4		1-3	1	7	0	0		0.0282	0.0236	0	0
CGGGAGGAAAGCTGGGATTATCC	23H-RNA	Y37E3.30		0	85	376	0	6		1-3	4	8	0	0		0.0329	0.017	NA	NA
ACTTCTTCCACGCCATCATCCACA	23H-RNA	Y57G11C.1145_hairpin		0	84	118	4	0		1-3	2	0	0	0		0.0116	0.0164	NA	NA
AGTGAGGCTCAGGATTTTGAGTG	23H-RNA	M4.2, puf-4		0	84	132	0	0		1-3	0	0	0	0		0	0	NA	NA
TGAGACATGGTATCGAGATATG	23H-RNA	Y37E11B.2		0	83	185	1	4		1-3	11	3	0	0		0.0665	0.0715	0	0
CAATGGAGCGGTGTAAACTTTTC	23H-RNA	E01G4.7		0	82	284	4	7		1-3	0	8	0	0		0.0137	0.0194	0	0
CTTTTGTTTCTCTTCCTCTTGC	23H-RNA	F19B2.5		0	82	60	0	0		1-3	0	0	0	0		0	0	NA	NA
TTGTGAAGACATCTCAGAAACA	23H-RNA	F43E2.6		0	82	126	4	0		1-3	22	21	1	0		0.1772	0.0486	NA	NA
AGTGGAGTGGATGACGACGACGAT	23H-RNA	Y57G11C.1145_hairpin		0	81	1166	6	4		1-3	3	58	3	2		0.0415	0.0083	0.3333	0
ATCCACGACGGCCGACAATTTCC	23H-RNA	Unknown_hairpin_RE2		0	81	756	0	0		1-3	0	0	0	0		0	0	NA	NA
AGGCACAGTTCTGTGGGCGGGGC	23H-RNA	H15N14.4, H37A05.4, Y24F12A.3, Y24F12A.4		0	80	415	0	0		1-3	5	5	0	0		0.0354	0.0332	NA	NA
CGGAGCTGAAGGATCAGAACATC	23H-RNA	Unknown_IR1		0	80	200	20	0		1-3	0	0	0	0		0	0	NA	NA
TCTTGCTTCTGTTCCAAATATGC	23H-RNA	F19B2.5		0	80	146	2	0		1-3	0	0	0	0		0	0	NA	NA
CAAGAGGAAGAGAAACAAAAGGA	23H-RNA	F19B2.5		0	78	272	0	0		1-3	2	44	0	0		0.0821	0.0808	NA	NA
TATCCACGACGGCCGACAATTTCC	23H-RNA	Unknown_hairpin_RE2		0	78	208	0	0		1-3	0	0	0	0		0	0	NA	NA
TGATTACGTCCCTGCCCTTTGT	23H-RNA	F31C3.7, F31C3.8, rrn-1.1, rrn-1.2		0	78	64	8	22		1-3	0	0	0	0		0	0	0	0
CGCGGGTGATGACAGAAACGGG	23H-RNA	dnj-27_element		0	77	567	7	0		1-3	0	0	0	0		0	0	NA	NA
CGGTGTGCTCGAGGGCTTGTCA	23H-RNA	Y37E3.30		0	77	235	1	1		1-3	0	0	2	0		0	0	0.3333	0.4714
TCGCGTAGATCACATGTAGATCA	23H-RNA	pcp-4, Unknown_RE8, Y116F11B.3, Y15E3A.3, Y6B3B.7, Y6B3B.9		0	77	88	0	0		1-3	0	11	0	0		0.0556	0.0786	NA	NA
TTTCGAAACCGTGCGGCAGTTGC	23H-RNA	DNA-8-1		0	77	252	0	0		1-3	0	0	0	0		0	0	NA	NA
ACGACGATGGCTGCGGCGAGGA	23H-RNA	Y57G11C.1145_hairpin		0	76	60	2	0		1-3	0	0	0	0		0	0	NA	NA
CTGAGGATTTTGAGTGAGGCTCA	23H-RNA	M4.2, puf-4		0	76	760	0	0		1-3	0	19	0	0		0.0122	0.0172	NA	NA
TAGTTTGTAGCCTGAGCCTCAAC	23H-RNA	other		0	76	57	0	0		1-3	0	0	0	0		0	0	NA	NA
TGGATGATGGCGTGGAAGAAGTTG	23H-RNA	Y57G11C.1145_hairpin		0	76	2204	16	8		1-3	18	586	0	8		0.2008	0.0131	0.25	0.3536
GAAGGGCAAAGAGTGCGATATC	23H-RNA	jmjc-1, T28F2.4		0	75	165	5	0		1-3	0	0	0	0		0	0	NA	NA
TCGACAACTAATTCCCGAATCTC	23H-RNA	T05E12.8		0	75	157	5	0		1-3	4	4	0	0		0.0377	0.0182	NA	NA
TTCTCTCGTAGAACGTGTCGCT	23H-RNA	F55A4.9, rncs-1		0	75	165	0	1		1-3	27	78	0	0		0.2928	0.0398	NA	NA
TCCCGCATTTTTTGTAGATCACA	23H-RNA	CELE14B		0	74	111	0	0		1-3	37	0	0	0		0.1667	0.2357	NA	NA
TTTTGCCTTTTCCCCGTGAGT	23H-RNA	PALTA3		0	74	74	0	0		1-3	0	0	0	0		0	0	NA	NA
CCGTCTAGGTGATCTTTCAACAC	23H-RNA	Y37E3.30		0	73	138	2	1		1-3	1	4	0	0		0.0208	0.0104	0	0
TTCTCTCGTAGAACGTGTCGCTT	23H-RNA	F55A4.9, rncs-1		0	73	198	0	0		1-3	19	71	0	0		0.2352	0.0406	NA	NA
AATGAAACGAGTGCTGCGAAAAC	23H-RNA	Y116A8B.1		0	72	172	0	1		1-3	2	12	1	0		0.0461	0.027	0.5	0.7071
ACGACGATGGCTGCGGCGAGGAT	23H-RNA	Y57G11C.1145_hairpin		0	72	260	2	0		1-3	2	14	0	0		0.0391	0.017	NA	NA
AGAGGTCCAAGTAAGATGATAGC	23H-RNA	F39E9.7		0	72	253	2	1		1-3	0	11	0	0		0.0208	0.0295	0	0
CAAGTTCAACAGGTAGATCAAA	23H-RNA	TIR54TA1		0	72	72	0	0		1-3	0	36	0	0		0.1667	0.2357	NA	NA
CATGTATTAAACGGTAAGGGCCGG	23H-RNA	mir-5592		0	72	378	0	0		1-3	18	4	0	0		0.1052	0.134	NA	NA
TCATCTCTGATCTTTTCCAATT	23H-RNA	F55A4.9, rncs-1		0	72	181	0	4		1-3	0	3	0	0		0.0082	0.0115	NA	NA
ACCACTTCCGCAGACGCTACAAC	23H-RNA	Y37E3.30		0	71	132	0	0		1-3	1	8	0	0		0.0355	0.0306	NA	NA
AGTGGGCCGAGCGATTCGCTGAT	23H-RNA	Y116A8C.27		0	71	205	0	0		1-3	1	2	0	0		0.0118	0.003	NA	NA
CAATAAAAACAATGGACAACTGC	23H-RNA	Y59H11AR.6		0	71	57	3	3		1-3	4	2	0	0		0.0436	0.0137	0	0
ACTGCCGCACGGTTTCGAAACT	23H-RNA	DNA-8-1		0	70	119	0	0		1-3	0	0	0	0		0	0	NA	NA
CCGGTCGATGCAATTCTTTTT	23H-RNA	other		0	70	140	7	0		1-3	0	0	0	0		0	0	NA	NA
TCAAAATCGGACGACCGGACGC	23H-RNA	Unknown_hairpin_RE2		0	70	350	0	0		1-3	0	35	0	0		0.0455	0.0643	NA	NA
TTTAAAGTCGTAGAAGTGGGAAA	23H-RNA	NPALTA1		0	70	70	0	0		1-3	0	0	0	0		0	0	NA	NA
TGAGATGTCGGCGGCCTGATA	23H-RNA	PALTA3		0	69	46	0	0		1-3	0	0	0	0		0	0	NA	NA
ATGGCTGCGGCGAGGATGATGT	23H-RNA	Y57G11C.1145_hairpin		0	68	208	0	4		1-3	2	2	0	0		0.019	0.0135	NA	NA
TTGCTTTCCTCATCTCTGATCTT	23H-RNA	F55A4.9, rncs-1		0	68	132	0	0		1-3	5	1	0	0		0.038	0.0431	NA	NA
TTTAGTGACTCTGGCCGTTCACC	23H-RNA	TTTAGTGACTCTGGCCGTTCACC_repeat		0	68	170	0	34		1-3	0	272	0	0		0.3077	0.4351	NA	NA
ACGACGACGATGGCTGCGGCGAG	23H-RNA	Y57G11C.1145_hairpin		0	66	92	0	0		1-3	12	14	2	0		0.143	0.0154	NA	NA
ACGACGATGGCTGCGGCGAGG	23H-RNA	Y57G11C.1145_hairpin		0	66	208	0	0		1-3	6	4	0	0		0.0511	0.0456	NA	NA
CATGAGATGTCGGCGGCCTGAT	23H-RNA	PALTA3		0	66	198	0	0		1-3	0	0	0	0		0	0	NA	NA
TCACGGGGAAAAGGCAAAATTCG	23H-RNA	PALTA3		0	66	462	0	0		1-3	231	2376	0	0		0.8075	0.042	NA	NA
AAGACCCTGTTGAGCTTGACTC	23H-RNA	F31C3.9, rrn-3.1		0	65	79	19	10		1-3	5	0	0	0		0.0357	0.0505	0	0
TTTTTGCTGATCTCTCTTCTCGG	23H-RNA	ChrIII_hairpin1		0	65	279	0	1		1-3	1	0	0	0		0.0076	0.0107	NA	NA
ATGATGGCGTGGAAGAAGTTG	23H-RNA	Y57G11C.1145_hairpin		0	64	174	4	0		1-3	78	270	4	4		0.5787	0.0416	0.75	0.3536
CATTCCTACGACATGGAGGTCCC	23H-RNA	C40A11.10, mir-8199		0	64	83	0	1		1-3	7	0	0	0		0.0493	0.0697	NA	NA
TGCAAATGAAATCGTGGGAGGGG	23H-RNA	Unknown_RE7		0	64	280	0	0		1-3	0	48	0	0		0.0732	0.1035	NA	NA
CAGCGAATCGCTCTGCCCACTTT	23H-RNA	Y116A8C.27		0	63	80	0	0		1-3	1	0	0	0		0.0078	0.011	NA	NA
TATTAGACTCCACATATCATTTC	23H-RNA	Y37E11B.2		0	63	54	0	2		1-3	4	1	0	0		0.0389	0.0294	NA	NA
ACGATGGCTGCGGCGAGGATGAT	23H-RNA	Y57G11C.1145_hairpin		0	62	154	0	0		1-3	0	0	0	0		0	0	NA	NA
GATTTAGCGCCCCGACATTGA	23H-RNA	F31C3.10, F31C3.9, rrn-3.1, rrn-3.56		0	62	54	36	22		1-3	6	0	2	0		0.0441	0.0624	0.0263	0.0372
CGGATAGTGTGATCTTAGAACCC	23H-RNA	Y116F11A.1		0	61	117	2	2		1-3	2	0	0	0		0.0159	0.0224	0	0
TATCGCACTCTTTGCCCTTCCGC	23H-RNA	jmjc-1, T28F2.4		0	61	61	1	0		1-3	0	1	0	0		0.0081	0.0114	NA	NA
TGTAACAACTCACCTGCCGAAT	23H-RNA	F31C3.9, rrn-3.1		0	61	18	22	5		1-3	0	1	0	0		0.0263	0.0372	0	0
ATGACGACGACGATGGCTGCGGC	23H-RNA	Y57G11C.1145_hairpin		0	60	194	8	4		1-3	4	12	0	0		0.0604	0.003	0	0
CGTACACAACCGAGCTCCGCC	23H-RNA	F49B2.3, Y116A8B.1		0	60	34	0	2		1-3	0	0	0	0		0	0	NA	NA
CTAAGACTGTTTCTGATCACAA	23H-RNA	F43E2.13, F43E2.6, linc-169		0	60	66	0	0		1-3	0	2	0	0		0.0147	0.0208	NA	NA
CTGTTCTGCTCTCTCTTTCAGCT	23H-RNA	F55A4.9, rncs-1		0	60	130	0	0		1-3	0	0	0	0		0	0	NA	NA
TAAACGGTAAGGGCCGGCTGG	23H-RNA	mir-5592, R07C3.18, R07C3.19		0	60	24	0	6		1-3	0	0	0	0		0	0	NA	NA
TACAACGTGGAGCTAAGACACC	23H-RNA	F55C9.3		0	60	120	0	2		1-3	3	7	0	0		0.0514	0.0053	NA	NA
TCAATGACGGAGTCGAGATCGAC	23H-RNA	Y37E11B.2		0	60	79	22	15		1-3	0	4	0	0		0.0241	0.0341	0	0
TCACGGAGTTAAATTTGAATTTT	23H-RNA	Y69A2AR.16_hairpin		0	60	208	0	2		1-3	6	4	0	0		0.0549	0.0509	NA	NA
TGAAGAGGCAGGGTCCGGTTG	23H-RNA	Y57G11C.1145_hairpin		0	60	186	2	0		1-3	0	0	0	0		0	0	NA	NA
TGATGCGGTTGTTCCAAAGAATC	23H-RNA	F55A4.9, rncs-1		0	60	154	0	0		1-3	2	19	0	0		0.071	0.0548	NA	NA
TGACATGGAGATTAGATAACA	23H-RNA	Y37E11B.2		0	59	114	1	1		1-3	6	4	1	0		0.0631	0.0413	0.25	0.3536
ACGGAGTTAAATTTGAATTTTT	23H-RNA	Y69A2AR.16_hairpin		0	58	90	8	8		1-3	2	4	0	0		0.0379	0.0065	0	0
ATACGGCTAGCCATATAAAGACC	23H-RNA	C36A4.14		0	58	112	1	0		1-3	3	4	0	0		0.0418	0.0104	NA	NA
CGGGATGATGGATCGGGATGAA	23H-RNA	T05E12.10		0	57	130	4	2		1-3	2	2	0	1		0.0245	0.0133	0.1667	0.2357
AATTCCAAAACTGCTGTTTCCCC	23H-RNA	Y59H11AR.6		0	56	55	0	3		1-3	2	3	0	0		0.0431	0.0122	NA	NA
AGCAGAAACTATATGGAACAT	23H-RNA	F39E9.29_region		0	56	54	4	6		1-3	4	0	2	0		0.0333	0.0471	0.1667	0.2357
ATATTTGGAACAGAAGCAAGA	23H-RNA	F19B2.5		0	56	104	0	0		1-3	18	12	0	0		0.1733	0.0988	NA	NA
ATCCTTGTACCAGTTATCTGCA	23H-RNA	K02E2.11		0	56	163	0	0		1-3	1	0	0	0		0.0088	0.0124	NA	NA
CATCATCCTCGCCGCAGCCATCGT	23H-RNA	Y57G11C.1145_hairpin		0	56	66	0	0		1-3	8	30	0	0		0.2188	0.1326	NA	NA
CCGCATTTTTTGTAGATCAAAGC	23H-RNA	CELE14B		0	56	84	0	0		1-3	0	0	0	0		0	0	NA	NA
TAGGGGAAAAGATGTTGAATG	23H-RNA	other		0	56	84	0	0		1-3	0	0	0	0		0	0	NA	NA
TTTTGGACCGAGTTGCCGTGACT	23H-RNA	PALNN1		0	56	112	0	0		1-3	28	0	0	0		0.1667	0.2357	NA	NA
CGCATTTTTTGTAGATCAAACCC	23H-RNA	CELE14B		0	55	44	0	0		1-3	0	0	0	0		0	0	NA	NA
TACGGGAAAAGCAGAGAGGCC	23H-RNA	F39E9.7		0	55	98	0	6		1-3	0	2	0	0		0.01	0.0141	NA	NA
TTCGCGTAGATCACATGTAGATC	23H-RNA	pcp-4, Unknown_RE8, Y116F11B.3, Y15E3A.3, Y6B3B.7, Y6B3B.9		0	55	99	0	0		1-3	0	0	0	0		0	0	NA	NA
TTCTGAGATGTCTTCACAATTCT	23H-RNA	F43E2.6		0	55	128	14	7		1-3	0	5	0	0		0.0188	0.0266	0	0
CATCATCCTCGCCGCAGCCATC	23H-RNA	Y57G11C.1145_hairpin		0	54	36	0	0		1-3	6	6	0	0		0.1214	0.0303	NA	NA
TCCCGCAATTCTCGTAGATCAAA	23H-RNA	other		0	54	24	0	0		1-3	0	0	0	0		0	0	NA	NA
TCCTCATCTCTGATCTTTTCCA	23H-RNA	F55A4.9, rncs-1		0	53	99	0	0		1-3	1	4	0	0		0.0287	0.0144	NA	NA
TCTCAGAAACATCGGCAAATG	23H-RNA	F43E2.6		0	53	156	2	0		1-3	26	38	0	3		0.2625	0.0942	0.5	0.7071
TGTGATTTTGGATTAAACTCA	23H-RNA	Y59H11AR.6		0	53	122	6	1		1-3	4	2	1	0		0.0432	0.0382	0.0714	0.101
AAATTGTCGGCCGCTGTGGAAAC	23H-RNA	ChrV_unknown_hairpin1		0	52	202	2	0		1-3	2	10	0	0		0.0421	0.0072	NA	NA
AGCCGTGGTCGATGCTGAAAG	23H-RNA	F55A4.9, rncs-1		0	52	128	0	2		1-3	0	12	0	0		0.0429	0.0606	NA	NA
CCCCGTGAGGACCGTGTACGCCC	23H-RNA	Y116A8B.1		0	52	88	0	0		1-3	0	1	0	0		0.0056	0.0079	NA	NA
CTCGCCGCAGCCATCGTCGTCGT	23H-RNA	Y57G11C.1145_hairpin		0	52	60	0	0		1-3	0	12	0	0		0.0833	0.1179	NA	NA
GTATTAAACGGTAAGGGCCGGCT	23H-RNA	mir-5592		0	52	52	26	6		1-3	0	0	0	0		0	0	0	0
TAAAAAATTCAAATTTAACTCCG	23H-RNA	Y69A2AR.16_hairpin		0	52	222	4	0		1-3	4	0	0	0		0.0357	0.0505	NA	NA
TCATCCTCGCCGCAGCCATCGT	23H-RNA	Y57G11C.1145_hairpin		0	52	48	0	0		1-3	20	56	0	0		0.4081	0.1843	NA	NA
TCCTGATCGCTCATCTAAACAACC	23H-RNA	F31C3.9, rrn-3.1		0	52	145	14	8		1-3	6	0	0	0		0.0517	0.0731	0	0
TTCTACATATCCAACGGAGGAAC	23H-RNA	Y17D7C.3		0	52	97	2	3		1-3	3	0	0	0		0.0273	0.0386	0	0
AAAGAATCCATTGTCCAGCTCC	23H-RNA	F55A4.9, rncs-1		0	51	100	0	0		1-3	9	8	0	4		0.112	0.0537	NA	NA
CCAAACTGGATTGACGAGCATCG	23H-RNA	F55A4.9, rncs-1		0	51	55	1	1		1-3	1	6	0	0		0.0588	0.056	0	0
TCATCTCTGATCTTTTCCAATTC	23H-RNA	F55A4.9, rncs-1		0	51	92	0	2		1-3	0	8	0	0		0.04	0.0566	NA	NA
AAAGTTGATGGACGGCGAGATT	23H-RNA	PALTTAA1		0	50	145	0	0		1-3	0	0	0	0		0	0	NA	NA
CAAAATTGGCGGAGCGATCGTTC	23H-RNA	other		0	50	20	0	0		1-3	0	0	0	0		0	0	NA	NA
CCCGCCCACAGAACTGTGCCTTG	23H-RNA	H15N14.4, H37A05.4, Y24F12A.3, Y24F12A.4		0	50	70	0	0		1-3	0	0	0	0		0	0	NA	NA
TATTTTTTGGCACCGCTGTTCTG	23H-RNA	F55A4.9, rncs-1		0	50	152	1	1		1-3	2	2	0	0		0.0257	0.018	0	0
TCATGCGTCTCGGTGGTCCGAA	23H-RNA	Y37E3.30		0	49	136	3	2		1-3	2	5	0	0		0.0373	0.0027	0	0
TCGTCGTCGTCATCCACTCCACT	23H-RNA	Y57G11C.1145_hairpin		0	49	97	0	0		1-3	1	2	0	0		0.0201	0.0001	NA	NA
ACCTGAACTTTTTGGATCAACA	23H-RNA	T05E12.10		0	48	105	0	1		1-3	1	4	0	0		0.0286	0.0115	NA	NA
CTGCGGCGAGGATGATGTGGATG	23H-RNA	Y57G11C.1145_hairpin		0	48	236	0	0		1-3	0	32	0	0		0.0597	0.0844	NA	NA
GACGACGAACGATCGGGATGGA	23H-RNA	ChrX_intergenic1		0	48	114	11	3		1-3	3	2	1	0		0.038	0.0294	0.0417	0.0589
GCAAGTGATTTAGCGCCCCGAC	23H-RNA	F31C3.10, F31C3.9, rrn-3.1, rrn-3.56		0	48	122	8	28		1-3	0	2	4	0		0.0081	0.0114	0.1667	0.2357
TCCTCAGCCTCACTTAAACTCTT	23H-RNA	M4.2, puf-4		0	48	32	0	0		1-3	0	0	0	0		0	0	NA	NA
TGATGGCGTGGAAGAAGTTGATG	23H-RNA	Y57G11C.1145_hairpin		0	48	466	0	2		1-3	54	750	0	2		0.5731	0.0618	NA	NA
AAATCGGAAACTCAAAGACCACA	23H-RNA	Y17D7C.3		0	47	95	3	0		1-3	0	1	1	0		0.0052	0.0074	NA	NA
ATCGGACGAGCTCTTATCCCCTC	23H-RNA	T05E12.8		0	47	40	2	1		1-3	1	0	0	0		0.0104	0.0147	0	0
TTTCTGAGATGTCTTCACAATT	23H-RNA	F43E2.6		0	47	52	0	3		1-3	0	0	0	0		0	0	NA	NA
TACATAGATGCCGAGTACAACCC	23H-RNA	E01G4.5		0	46	63	1	4		1-3	0	3	0	0		0.0227	0.0321	0	0
TATCAGGCCGCCGACATCTCATG	23H-RNA	PALTA3		0	46	161	0	0		1-3	0	0	0	0		0	0	NA	NA
TCCGGTTCAGAGCAGATGACAAC	23H-RNA	Y17D7C.3		0	46	72	1	3		1-3	0	1	1	0		0.0068	0.0097	0.25	0.3536
ACGATTTTGAACGTATAGACCCA	23H-RNA	Y29A2AR.16		0	45	85	0	0		1-3	0	4	0	0		0.0225	0.0318	NA	NA
ATTTTGGGGGGCAGAAATCGGAA	23H-RNA	PAL8C		0	45	60	0	0		1-3	0	15	0	0		0.1	0.1414	NA	NA
CCCGCGGGTGATGACAGAAAC	23H-RNA	dnj-27_element		0	45	60	0	0		1-3	0	20	0	0		0.125	0.1768	NA	NA
AAGACATCTCAGAAACATCGG	23H-RNA	F43E2.6		0	44	71	0	4		1-3	4	25	0	0		0.1719	0.1252	NA	NA
CCATCAGCACCAACACCTCACC	23H-RNA	C36A4.14		0	44	45	2	1		1-3	0	2	0	0		0.0213	0.0301	0	0
CGATGTTTCTGAGATGTCTTCAC	23H-RNA	F43E2.6		0	44	85	4	0		1-3	19	37	0	0		0.3024	0.0012	NA	NA
TACGGGAAAAGCAGAGAGGCCAC	23H-RNA	F39E9.7		0	43	71	2	0		1-3	2	2	0	1		0.0359	0.0121	0.5	0.7071
TGCTTTCCTCATCTCTGATCT	23H-RNA	F55A4.9, rncs-1		0	43	86	0	0		1-3	0	5	0	0		0.0275	0.0389	NA	NA
TTCCTCATCTCTGATCTTTTCCA	23H-RNA	F55A4.9, rncs-1		0	43	17	0	0		1-3	3	3	0	0		0.1076	0.06	NA	NA
AGTGGTTCGTGGCTTCCAAATCC	23H-RNA	T05E12.8		0	42	58	0	1		1-3	0	0	0	1		0	0	NA	NA
ATGATGTGGATGATGGCGTGGA	23H-RNA	Y57G11C.1145_hairpin		0	42	118	2	0		1-3	2	0	0	0		0.0227	0.0321	NA	NA
CACGGTGCCAGATCCTGAAAACG	23H-RNA	other		0	42	42	0	0		1-3	0	0	0	0		0	0	NA	NA
CTCGTCGATCCAGTTTGGCCA	23H-RNA	F55A4.9, rncs-1		0	42	64	0	0		1-3	6	29	0	0		0.2184	0.1321	NA	NA
CTCTTCGAGCGCGTCTTCTTGC	23H-RNA	ChrIII_hairpin1		0	42	100	0	0		1-3	0	2	0	0		0.0098	0.0139	NA	NA
GGAGTGGATGACGACGACGATGG	23H-RNA	Y57G11C.1145_hairpin		0	42	284	4	2		1-3	0	4	0	0		0.0069	0.0098	0	0
TAAACGCAGCGGCGCGCGGAACC	23H-RNA	PALTA3		0	42	84	0	0		1-3	0	0	0	0		0	0	NA	NA
TATTAGACTCCACATATCATTT	23H-RNA	Y37E11B.2		0	42	25	2	0		1-3	1	0	0	0		0.0116	0.0164	NA	NA
TCGACACATTGATCATGCTGATA	23H-RNA	other		0	42	280	0	0		1-3	14	84	0	0		0.2404	0.0136	NA	NA
TGATCTACAAAAAATGCGGGAAC	23H-RNA	CELE14B		0	42	252	0	0		1-3	0	0	0	0		0	0	NA	NA
AATCGGGATGGATCGATGGATT	23H-RNA	T05E12.10		0	41	88	0	3		1-3	4	2	0	0		0.0556	0.0471	NA	NA
GAAGACATCTCAGAAACATCGGC	23H-RNA	F43E2.6		0	41	49	0	14		1-3	30	36	1	1		0.423	0.0007	0.5333	0.66
GCCGATGTTTCTGAGATGTCTT	23H-RNA	F43E2.6		0	41	86	6	11		1-3	3	0	0	0		0.0341	0.0482	0	0
TTCGAGACTCGTCAGATCTGC	23H-RNA	K02E2.6		0	41	57	0	0		1-3	0	0	0	0		0	0	NA	NA
TTGTGTCGACAACTAATTCCCGA	23H-RNA	T05E12.8		0	41	49	4	5		1-3	0	0	1	0		0	0	0.1	0.1414
AAATTGTCGGCCGCCGTGAAAAC	23H-RNA	other		0	40	60	0	0		1-3	140	580	20	10		0.842	0.0908	1	0
ATGTGGATGATGGCGTGGAAGAA	23H-RNA	Y57G11C.1145_hairpin		0	40	260	0	0		1-3	32	72	0	0		0.3307	0.1609	NA	NA
CAGTGGAGTGGATGACGACGACGA	23H-RNA	Y57G11C.1145_hairpin		0	40	107	0	1		1-3	5	17	0	0		0.1241	0.0184	NA	NA
CCGGCCCTTACCGTTTAATACA	23H-RNA	mir-5592		0	40	60	0	0		1-3	0	0	0	0		0	0	NA	NA
CGATGGCTGCGGCGAGGATGA	23H-RNA	Y57G11C.1145_hairpin		0	40	236	0	0		1-3	0	4	2	0		0.0083	0.0118	NA	NA
TATTCCTGATGCGGCGCCGGCTC	23H-RNA	T05E12.8		0	40	81	2	0		1-3	0	0	0	0		0	0	NA	NA
AATCTACTTAAATCAACGAAT	23H-RNA	mek-2, Y54E10BL.6, Y71F9AL.1		0	39	6	0	0		1-3	3	0	0	0		0.0357	0.0505	NA	NA
ATTCTCTCGTAGAACGTGTCGC	23H-RNA	F55A4.9, rncs-1		0	39	37	0	0		1-3	27	26	2	0		0.4109	0.0026	NA	NA
CCATTTGCCGATGTTTCTGAGA	23H-RNA	F43E2.6		0	39	88	1	0		1-3	0	0	0	0		0	0	NA	NA
CCCGCATTTTTTGTAGATCAGA	23H-RNA	CELE14B		0	39	52	0	0		1-3	0	13	0	0		0.1	0.1414	NA	NA
TCGTCGTCATCCACTCCACCG	23H-RNA	Y57G11C.1145_hairpin		0	39	40	0	0		1-3	0	0	0	0		0	0	NA	NA
TGCGTCTCTCCCCCTCCCACACT	23H-RNA	other		0	39	39	0	0		1-3	0	0	0	0		0	0	NA	NA
ATATTTGGAACAGAAGCAAGAG	23H-RNA	F19B2.5		0	38	44	0	0		1-3	6	8	0	0		0.1451	0.0124	NA	NA
ATGTGGATGATGGCGTGGAAGA	23H-RNA	Y57G11C.1145_hairpin		0	38	296	0	0		1-3	4	6	0	0		0.0576	0.0533	NA	NA
ATGTTTCTGAGATGTCTTCACA	23H-RNA	F43E2.6		0	38	68	0	0		1-3	1	9	0	0		0.0713	0.0645	NA	NA
CATCTCAGAAACATCGGCAAATGG	23H-RNA	F43E2.6		0	38	212	2	0		1-3	22	168	5	2		0.4044	0.0533	0.8571	0.202
TAGTTTTCGGGGTACGGTATCT	23H-RNA	ChrIII_hairpin2		0	38	156	0	4		1-3	0	0	0	0		0	0	NA	NA
TGCTTTCCTCATCTCTGATCTTTT	23H-RNA	F55A4.9, rncs-1		0	38	114	0	0		1-3	4	2	0	0		0.0562	0.0552	NA	NA
TGGTTAGGATTCGTGGTTTTCA	23H-RNA	tRNA		0	38	95	0	0		1-3	0	0	0	0		0	0	NA	NA
TTAGGATTCGTGGTTTTCACCC	23H-RNA	tRNA		0	38	57	0	0		1-3	0	0	0	0		0	0	NA	NA
TTCTGGAATGAAACGAGTGCTGC	23H-RNA	Y116A8B.1		0	38	96	2	4		1-3	0	5	0	0		0.0248	0.035	0	0
AAGAATCCATTGTCCAGCTCC	23H-RNA	F55A4.9, rncs-1		0	37	49	0	0		1-3	6	7	0	0		0.1323	0.0103	NA	NA
CGGGATGATGGATCGGGATGA	23H-RNA	T05E12.10		0	37	72	9	10		1-3	1	3	0	0		0.0332	0.0097	0	0
CGTGGCGTGTACTGCAGAAAACC	23H-RNA	PALTA3		0	37	54	0	4		1-3	9	31	0	0		0.2802	0.1195	NA	NA
TTTTTTCTGTATTCTTATTTTT	23H-RNA	F52G3.8		0	37	80	15	5		1-3	0	0	0	0		0	0	0	0
CCGTGAGTGGACGAGAAAAAGG	23H-RNA	PALTA3		0	36	18	0	0		1-3	0	0	0	0		0	0	NA	NA
CGACGTGTTCCAGCATTCTTCGAC	23H-RNA	Y37E3.30		0	36	98	0	2		1-3	1	2	0	0		0.0235	0.005	NA	NA
CTACAACGTGGAGCTAAGACACCC	23H-RNA	F55C9.3		0	36	60	1	0		1-3	0	1	0	0		0.0082	0.0116	NA	NA
TCCGTGTCACATCTGTCCGAAAT	23H-RNA	other		0	36	72	0	0		1-3	24	60	0	0		0.4273	0.0386	NA	NA
CAATGGAGCGGTGTAAACTTTT	23H-RNA	E01G4.7		0	35	62	0	1		1-3	1	0	0	0		0.0139	0.0196	NA	NA
TGACATCCCTTCTGATCGTGGA	23H-RNA	E01G4.7		0	35	42	0	0		1-3	1	1	0	0		0.0255	0.0032	NA	NA
TGTGGGCGGGGCCAATCCGGAA	23H-RNA	H15N14.4, H37A05.4, Y24F12A.3, Y24F12A.4		0	35	42	0	0		1-3	0	0	0	0		0	0	NA	NA
CATGGCCGTTCTTAGTTGGTGGA	23H-RNA	F31C3.7, F31C3.8, rrn-1.1, rrn-1.2		0	34	28	8	6		1-3	2	0	0	0		0.0278	0.0393	0	0
TCCCTGCCCTTTGTACACACCG	23H-RNA	F31C3.7, F31C3.8, rrn-1.1, rrn-1.2		0	34	14	14	4		1-3	0	0	0	0		0	0	0	0
TCTGAGATGTCTTCACAATTCT	23H-RNA	F43E2.6		0	34	60	1	2		1-3	2	0	0	0		0.0278	0.0393	0	0
TTCGGCAATGGGGTACCCTACG	23H-RNA	Y37E3.30		0	34	37	0	1		1-3	0	0	0	0		0	0	NA	NA
AAAAATGTAGAAGCTGTGGGCA	23H-RNA	E01G4.5		0	33	45	2	0		1-3	0	6	0	0		0.0588	0.0832	NA	NA
AATATTTATTTCGCATCCCTCCC	23H-RNA	Y57G11C.36, Y57G11C.51		0	33	15	0	0		1-3	0	0	0	0		0	0	NA	NA
AATTCTCTCGTAGAACGTGTCGC	23H-RNA	F55A4.9, rncs-1		0	33	118	0	0		1-3	7	31	0	0		0.1915	0.0234	NA	NA
ATGTTTCTGAGATGTCTTCAC	23H-RNA	F43E2.6		0	33	33	4	1		1-3	30	30	0	0		0.4762	0	0	0
ATTCTCTCGTAGAACGTGTCGCTT	23H-RNA	F55A4.9, rncs-1		0	33	143	0	1		1-3	2	40	0	0		0.1379	0.1142	NA	NA
ATTGTGAAGACATCTCAGAAA	23H-RNA	F43E2.6		0	33	37	2	4		1-3	1	1	0	2		0.0279	0.0022	0.1667	0.2357
CAGCGTCGTACGATGAAAGATG	23H-RNA	F52G3.8		0	33	52	1	1		1-3	0	5	0	0		0.0439	0.062	0	0
CCATCGGACGAGCTCTTATCCCC	23H-RNA	T05E12.8		0	33	62	0	0		1-3	0	0	0	0		0	0	NA	NA
CGCCAAACATGGATCAACTGGA	23H-RNA	ZK402.2, ZK402.3, ZK402.5		0	33	45	0	0		1-3	3	0	0	0		0.0417	0.0589	NA	NA
TAAATCTACTTAAATCAACGAAT	23H-RNA	mek-2, Y54E10BL.6, Y71F9AL.1		0	33	51	0	0		1-3	0	0	0	0		0	0	NA	NA
TAGAAGCCGCCGGGATGGACACC	23H-RNA	E01G4.5		0	33	76	1	0		1-3	0	2	0	0		0.0128	0.0181	NA	NA
TTGCCGATGTTTCTGAGATGTCTT	23H-RNA	F43E2.6		0	33	184	2	0		1-3	1	6	0	0		0.0305	0.0015	NA	NA
AAATCACCGTCTAATTTTGAGT	23H-RNA	other		0	32	24	0	0		1-3	0	16	0	0		0.2	0.2828	NA	NA
ACAACCCTGAACCAGACGTACC	23H-RNA	F31C3.11, rrn-2.1, rrn-2.1_element		0	32	26	0	0		1-3	0	2	0	0		0.0357	0.0505	NA	NA
GATAGTCTCAACAGATCGCAGT	23H-RNA	F31C3.10, F31C3.9, rrn-3.1, rrn-3.56		0	32	44	10	2		1-3	0	0	0	0		0	0	0	0
GCGCCCCGACATTGAACCAGAG	23H-RNA	F31C3.10, F31C3.9, rrn-3.1, rrn-3.56		0	32	10	6	2		1-3	0	0	0	0		0	0	0	0
TCCGATTTCTGCCCCCCAAAAT	23H-RNA	PAL8C		0	32	32	0	0		1-3	16	0	0	0		0.1667	0.2357	NA	NA
TGCAACTAAGACACCCCGAACT	23H-RNA	Y37E3.30		0	32	22	1	3		1-3	0	0	0	0		0	0	0	0
TGCGGAGAAATGACGAGAAAT	23H-RNA	other		0	32	32	0	0		1-3	0	0	0	0		0	0	NA	NA
TGGATAAGATGATGAAACTAGTC	23H-RNA	F55A4.9, rncs-1		0	32	104	2	0		1-3	24	170	0	0		0.5245	0.1357	NA	NA
TTCACGGCGGCCGACAATTTCC	23H-RNA	other		0	32	144	0	0		1-3	0	0	0	0		0	0	NA	NA
TTCGAGACTCGTCAGATCTGCAT	23H-RNA	K02E2.6		0	32	40	0	0		1-3	0	3	0	0		0.0349	0.0493	NA	NA
TTCTGAGATGTCTTCACAATTC	23H-RNA	F43E2.6		0	32	79	5	0		1-3	3	2	0	0		0.0552	0.0431	NA	NA
TTTCCTCATCTCTGATCTTTTCCA	23H-RNA	F55A4.9, rncs-1		0	32	78	0	1		1-3	1	9	0	0		0.0669	0.0517	NA	NA
TTTGGCCAAGCGGACTGGAGCACA	23H-RNA	F55A4.9, rncs-1		0	32	292	2	4		1-3	10	202	2	2		0.3235	0.1208	0.4167	0.1179
TTTGGGGGGCAGAAATCGGAAA	23H-RNA	PAL8C		0	32	32	0	0		1-3	16	0	0	0		0.1667	0.2357	NA	NA
ATCCCCCCTCCTGTGGAAGTAGA	23H-RNA	C36A4.14		0	31	118	16	12		1-3	0	7	2	0		0.028	0.0396	0.0556	0.0786
TTTTTTGGCACCGCTGTTCTGC	23H-RNA	F55A4.9, rncs-1		0	31	93	2	0		1-3	0	0	0	0		0	0	NA	NA
ACGTGTCGCTTCGTCATCTGA	23H-RNA	F55A4.9, rncs-1		0	30	84	0	0		1-3	4	0	0	0		0.0588	0.0832	NA	NA
ATCGTCGTCGTCATCCACTCCACT	23H-RNA	Y57G11C.1145_hairpin		0	30	61	0	0		1-3	4	0	0	0		0.0588	0.0832	NA	NA
ATGATGGCGTGGAAGAAGTTGAT	23H-RNA	Y57G11C.1145_hairpin		0	30	382	0	0		1-3	38	320	0	10		0.5073	0.0728	NA	NA
ATGATGTGGATGATGGCGTGGAA	23H-RNA	Y57G11C.1145_hairpin		0	30	218	4	0		1-3	0	4	0	0		0.009	0.0127	NA	NA
CGGAGTTAAATTTGAATTTTTT	23H-RNA	Y69A2AR.16_hairpin		0	30	82	0	0		1-3	0	0	0	0		0	0	NA	NA
CTTCTTCCACGCCATCATCCACA	23H-RNA	Y57G11C.1145_hairpin		0	30	48	0	0		1-3	8	0	0	0		0.1053	0.1489	NA	NA
GACCAAGTCGTATGCAAGTGAT	23H-RNA	F31C3.10, F31C3.9, rrn-3.1, rrn-3.56		0	30	56	0	6		1-3	2	0	0	0		0.0313	0.0442	NA	NA
TTGCCAAATGGACGTACAGATC	23H-RNA	Y105C5A.14		0	30	3	1	0		1-3	0	0	0	0		0	0	NA	NA
AGCGACACGTTCTACGAGGGAAT	23H-RNA	F55A4.9, rncs-1		0	29	84	0	0		1-3	5	3	0	0		0.0908	0.0796	NA	NA
ATTCCACTTGCATCATACGACG	23H-RNA	F52D2.6		0	29	73	0	2		1-3	1	6	0	0		0.0546	0.0301	NA	NA
CCCTTACCGTTTAATACATGTT	23H-RNA	mir-5592		0	29	39	0	0		1-3	0	2	0	0		0.0244	0.0345	NA	NA
CCTTTCGGAGTGATAGCGATAAC	23H-RNA	Y116A8B.1		0	29	108	11	3		1-3	0	1	0	0		0.0046	0.0065	0	0
TTTTGCTGATCTCTCTTCTCGG	23H-RNA	ChrIII_hairpin1		0	29	39	6	5		1-3	0	0	0	0		0	0	0	0
AACAACCCTGAACCAGACGTAC	23H-RNA	F31C3.11, rrn-2.1, rrn-2.1_element		0	28	84	4	8		1-3	4	2	0	0		0.0741	0.0719	0	0
ATGACGACGACGATGGCTGCGG	23H-RNA	Y57G11C.1145_hairpin		0	28	70	6	6		1-3	0	0	0	0		0	0	0	0
ATTGGCCTACCGAACGAAAAACC	23H-RNA	Y116F11A.1		0	28	57	0	0		1-3	2	2	0	0		0.0503	0.0232	NA	NA
CCATCGTCGTCGTCATCCACTCC	23H-RNA	Y57G11C.1145_hairpin		0	28	92	0	0		1-3	0	0	0	0		0	0	NA	NA
CCCTTTGTACACACCGCCCGTC	23H-RNA	F31C3.7, F31C3.8, rrn-1.1, rrn-1.2		0	28	4	16	0		1-3	0	0	0	0		0	0	NA	NA
CCGTCTAGGTGATCTTTCAACA	23H-RNA	Y37E3.30		0	28	25	3	0		1-3	0	0	0	0		0	0	NA	NA
GACAGTCCCCACTCTTCTCGA	23H-RNA	F31C3.7, F31C3.8, rrn-1.1, rrn-1.2		0	28	44	14	14		1-3	0	0	8	0		0	0	0.1818	0.2571
GCTACACCTCTCATGACTCTT	23H-RNA	F31C3.9, rrn-3.1		0	28	15	12	0		1-3	0	0	0	0		0	0	NA	NA
TATTAAACGGTAAGGGCCGGCTGG	23H-RNA	mir-5592		0	28	132	0	0		1-3	0	6	0	0		0.0217	0.0307	NA	NA
TGAAATCGTGGGAGGGGCTTAAA	23H-RNA	Unknown_RE7		0	28	105	0	0		1-3	0	0	0	0		0	0	NA	NA
TGTTCTGCTCTCTCTTTCAGCT	23H-RNA	F55A4.9, rncs-1		0	28	58	2	0		1-3	0	0	0	0		0	0	NA	NA
TTGCTTTCCTCATCTCTGATCTTT	23H-RNA	F55A4.9, rncs-1		0	28	58	0	0		1-3	1	0	0	0		0.0172	0.0244	NA	NA
TTTCACGGCGGCCGACAATTTCC	23H-RNA	other		0	28	42	0	0		1-3	0	0	0	0		0	0	NA	NA
TTTGGCCAAGCGGACTGGAGC	23H-RNA	F55A4.9, rncs-1		0	28	50	0	0		1-3	6	26	0	0		0.2593	0.1171	NA	NA
ACGATGGATTCTTTGGAGCAACC	23H-RNA	F55A4.9, rncs-1		0	27	76	1	1		1-3	0	4	0	0		0.025	0.0354	0	0
ATCGGTGTGCTCGAGGGCTTGT	23H-RNA	Y37E3.30		0	27	138	1	2		1-3	0	1	0	0		0.0036	0.0051	0	0
CCTTCTACTTGGACGGAACAGCC	23H-RNA	Y17D7C.3		0	27	24	5	5		1-3	0	0	0	0		0	0	0	0
CGACGACGAACGATCGGGATGGA	23H-RNA	ChrX_intergenic1		0	27	140	0	5		1-3	2	0	0	0		0.0345	0.0488	NA	NA
CTAAATACTGGAGCAGCGCAACC	23H-RNA	F52G3.8		0	27	48	0	0		1-3	0	1	0	0		0.0102	0.0144	NA	NA
GACATCTCAGAAACATCGGCAA	23H-RNA	F43E2.6		0	27	22	0	6		1-3	18	36	0	0		0.5103	0.1561	NA	NA
GTTTGATCTCCGAGAATTGCGGG	23H-RNA	dnj-27_element		0	27	234	0	0		1-3	0	0	0	0		0	0	NA	NA
TCTCAGAAACATCGGCAAATGG	23H-RNA	F43E2.6		0	27	25	0	3		1-3	11	30	0	0		0.4175	0.181	NA	NA
TTCATTCTGCCCTCGCACACACC	23H-RNA	T25G12.8		0	27	43	1	0		1-3	0	0	0	0		0	0	NA	NA
AAATTCAAATTTAACTCCGTG	23H-RNA	Y69A2AR.16_hairpin		0	26	16	0	0		1-3	0	0	0	0		0	0	NA	NA
AAATTCAAATTTAACTCCGTGAC	23H-RNA	Y69A2AR.16_hairpin		0	26	58	0	0		1-3	0	0	0	0		0	0	NA	NA
ACGATGGCTGCGGCGAGGATGA	23H-RNA	Y57G11C.1145_hairpin		0	26	48	0	6		1-3	0	0	0	0		0	0	NA	NA
ACGGAGTTAAATTTGAATTTTTT	23H-RNA	Y69A2AR.16_hairpin		0	26	82	0	2		1-3	0	0	0	0		0	0	NA	NA
CGGAGTTAAATTTGAATTTTTTA	23H-RNA	Y69A2AR.16_hairpin		0	26	74	0	0		1-3	2	0	0	0		0.0357	0.0505	NA	NA
GAAAGACTAATCGAACCATCTA	23H-RNA	F31C3.9, rrn-3.1		0	26	27	6	8		1-3	0	0	0	0		0	0	0	0
TCCCGCATTTTTTGTAGATCAGA	23H-RNA	CELE14B		0	26	91	0	0		1-3	0	0	0	0		0	0	NA	NA
TGCTCGTCGATCCAGTTTGGCC	23H-RNA	F55A4.9, rncs-1		0	26	68	0	0		1-3	5	20	1	0		0.1943	0.0467	NA	NA
TGGAGACCCTCACCTACCTGCG	23H-RNA	other, Y116A8B.1		0	26	116	0	0		1-3	2	0	0	0		0.0357	0.0505	NA	NA
TGTGGATGATGGCGTGGAAGAA	23H-RNA	Y57G11C.1145_hairpin		0	26	100	0	2		1-3	22	58	0	0		0.4127	0.0645	NA	NA
TTATCATTGCCCGTCGCCTTTA	23H-RNA	C02B8.2, F31A9.4, fbxc-37, fbxc-38		0	26	50	4	0		1-3	0	0	0	0		0	0	NA	NA
AAGTATGATTGATATTGGGAAC	23H-RNA	Y59H11AR.6		0	25	144	0	1		1-3	3	6	0	0		0.0736	0.0475	NA	NA
CGTTCTACGAGGGAATTGACT	23H-RNA	F55A4.9, rncs-1		0	25	19	0	0		1-3	0	5	0	0		0.1042	0.1473	NA	NA
CTCCATACGGTCATTTGAGTCTC	23H-RNA	F34D6.11, linc-12		0	25	47	1	1		1-3	1	2	0	0		0.0396	0.0017	0	0
TCAATAAAAACAATGGACAACT	23H-RNA	Y59H11AR.6		0	25	49	1	0		1-3	1	1	0	0		0.0292	0.0131	NA	NA
TCATGCGTCTCGGTGGTCCGA	23H-RNA	Y37E3.30		0	25	5	0	1		1-3	0	0	0	0		0	0	NA	NA
TGGCCAAACTGGATTGACGAGC	23H-RNA	F55A4.9, rncs-1		0	25	55	2	0		1-3	1	2	0	0		0.0368	0.0024	NA	NA
TTTCGGACAGATGTGACACGGA	23H-RNA	other		0	25	85	0	0		1-3	0	0	0	0		0	0	NA	NA
AAAAGAACTGAAGAGAGTGGGA	23H-RNA	other		0	24	48	0	0		1-3	0	0	0	8		0	0	NA	NA
ACCAATTGTACTTTGTAGGAGCC	23H-RNA	Y116A8B.1		0	24	99	3	0		1-3	0	1	0	0		0.005	0.0071	NA	NA
ACTTCTTCCACGCCATCATCCAC	23H-RNA	Y57G11C.1145_hairpin		0	24	60	0	0		1-3	0	0	0	0		0	0	NA	NA
ACTTTTTCAGCGGTCTCGTTATA	23H-RNA	PAL5A		0	24	72	0	0		1-3	144	408	0	0		0.8536	0.0051	NA	NA
AGTGTAGTCAGCTGAAGAGACA	23H-RNA	rft-2, Y47D7A.14_IR, Y47D7A.14_IR_element		0	24	16	0	0		1-3	0	0	0	0		0	0	NA	NA
CCAAGCGGACTGGAGCACATTGGA	23H-RNA	F55A4.9, rncs-1		0	24	44	0	0		1-3	0	0	0	0		0	0	NA	NA
CGACGACGATGGCTGCGGCGAG	23H-RNA	Y57G11C.1145_hairpin		0	24	40	0	0		1-3	2	14	0	0		0.1681	0.1289	NA	NA
CTCAAAATCCTGAGCCTCACTCA	23H-RNA	M4.2, puf-4		0	24	60	0	0		1-3	0	36	0	0		0.1875	0.2652	NA	NA
GGCCCTTACCGTTTAATACATG	23H-RNA	mir-5592		0	24	34	0	2		1-3	0	0	0	0		0	0	NA	NA
TCACGGAGTTAAATTTGAATT	23H-RNA	Y69A2AR.16_hairpin		0	24	8	0	0		1-3	0	0	0	0		0	0	NA	NA
TCCACATCATCCTCGCCGCAGCC	23H-RNA	Y57G11C.1145_hairpin		0	24	20	0	0		1-3	4	8	0	0		0.2143	0.101	NA	NA
TCCGCGCACCGCTATGTTTAACT	23H-RNA	other, Y64G10A.10		0	24	15	0	0		1-3	987	2127	9	0		0.9846	0.0118	NA	NA
TCCGCGCGCCGCTGTGTTTAACT	23H-RNA	other		0	24	54	0	0		1-3	0	0	0	0		0	0	NA	NA
TCGTTGATTTAAGTAGATTTATG	23H-RNA	Y71F9AL.1_hairpin		0	24	102	0	0		1-3	0	16	0	0		0.0678	0.0959	NA	NA
TCTTGCTTCTGTTCCAAATATG	23H-RNA	F19B2.5		0	24	66	0	0		1-3	0	0	0	0		0	0	NA	NA
TGAAAGAGAGAGCAGAACAGCG	23H-RNA	F55A4.9, rncs-1		0	24	78	0	0		1-3	6	6	0	0		0.1357	0.0909	NA	NA
TGACGACGACGATGGCTGCGGC	23H-RNA	Y57G11C.1145_hairpin		0	24	38	0	0		1-3	0	0	0	0		0	0	NA	NA
TGATGTGGATGATGGCGTGGAAG	23H-RNA	Y57G11C.1145_hairpin		0	24	134	2	0		1-3	2	14	0	0		0.0858	0.0125	NA	NA
TTGCTTTTTGATCCTTCGATGT	23H-RNA	F31C3.10, F31C3.9, rrn-3.1, rrn-3.56		0	24	14	6	2		1-3	0	0	0	0		0	0	0	0
AAGTATGATTGATATTGGGAACA	23H-RNA	Y59H11AR.6		0	23	63	1	0		1-3	0	5	0	0		0.0368	0.052	NA	NA
AATTCTCTCGTAGAACGTGTCG	23H-RNA	F55A4.9, rncs-1		0	23	16	0	1		1-3	4	13	0	0		0.2982	0.2122	NA	NA
CACGATCAGAAGGGATGTCACT	23H-RNA	E01G4.7		0	23	47	13	12		1-3	0	1	0	0		0.0104	0.0147	0	0
CTTCTATCATTCTCGAATTCCC	23H-RNA	other		0	23	11	0	2		1-3	1	0	0	0		0.0208	0.0295	NA	NA
AAAAGAAGACTGATCTCGGGCG	23H-RNA	Y65A5A.26, Y65A5A.t3, Y7A9D.66, Y7A9D.t3		0	22	94	0	0		1-3	0	6	0	0		0.03	0.0424	NA	NA
ATCATCCTCGCCGCAGCCATCGT	23H-RNA	Y57G11C.1145_hairpin		0	22	20	0	2		1-3	4	2	0	0		0.1224	0.0445	NA	NA
ATGTATGGAGGACGAACACAACC	23H-RNA	C36A4.14		0	22	78	10	14		1-3	0	2	1	0		0.0125	0.0177	0.0455	0.0643
CCCGCCCACAGTTCTGTACCTTG	23H-RNA	Y24F12A.3, Y24F12A.4		0	22	34	0	0		1-3	0	0	0	0		0	0	NA	NA
CGATGGATTCTTTGGAGCAAC	23H-RNA	F55A4.9, rncs-1		0	22	45	0	0		1-3	0	0	0	0		0	0	NA	NA
TACGAGGGAATTGACTAGTTTCA	23H-RNA	F55A4.9, rncs-1		0	22	56	0	0		1-3	4	14	0	0		0.1769	0.0326	NA	NA
TAGAAGACCACTTCCGCAGACG	23H-RNA	Y37E3.30		0	22	23	2	1		1-3	0	2	0	0		0.04	0.0566	0	0
TATTTGGAACAGAAGCAAGAGG	23H-RNA	F19B2.5		0	22	40	0	0		1-3	20	10	0	0		0.3381	0.1953	NA	NA
TGATCTACCTGTTGAACTTGACC	23H-RNA	other		0	22	8	0	0		1-3	0	0	0	0		0	0	NA	NA
TGATCTCTCTTCTCGGCTCTTCG	23H-RNA	ChrIII_hairpin1		0	22	68	0	0		1-3	0	0	0	0		0	0	NA	NA
TGTGAAGACATCTCAGAAACATCG	23H-RNA	F43E2.6		0	22	25	0	0		1-3	1	12	0	0		0.1839	0.1986	NA	NA
TTGGCCAAGCGGACTGGAGCACA	23H-RNA	F55A4.9, rncs-1		0	22	30	0	0		1-3	4	20	0	0		0.2769	0.1741	NA	NA
ATGCGGTTGTTCCAAAGAATCC	23H-RNA	F55A4.9, rncs-1		0	21	23	0	0		1-3	3	1	0	0		0.0833	0.0589	NA	NA
CAGTGGAGTGGATGACGACGACG	23H-RNA	Y57G11C.1145_hairpin		0	21	169	3	1		1-3	2	8	0	0		0.0661	0.0295	0	0
CATTTGCCGATGTTTCTGAGA	23H-RNA	F43E2.6		0	21	61	2	4		1-3	3	2	0	0		0.0784	0.0659	0	0
CTCTCGTAGAACGTGTCGCTTCG	23H-RNA	F55A4.9, rncs-1		0	21	38	0	0		1-3	4	5	0	0		0.1381	0.0309	NA	NA
CTTCCTTGACGACATATGGCCC	23H-RNA	other		0	21	30	0	0		1-3	0	1	0	0		0.0161	0.0228	NA	NA
TCAATGACGGAGTCGAGATCGA	23H-RNA	Y37E11B.2		0	21	65	0	4		1-3	0	0	1	0		0	0	0.5	0.7071
TGTAATTCTGCAGCCACTTCCGA	23H-RNA	W03D2.15		0	21	15	0	0		1-3	0	0	0	0		0	0	NA	NA
TGTAGATCACACCGTGATGGGAC	23H-RNA	CELE14B		0	21	49	7	0		1-3	28	7	0	0		0.3482	0.3157	NA	NA
TTCTACATATCCAAACGAGGAACC	23H-RNA	Y17D7C.3		0	21	39	0	0		1-3	0	1	0	0		0.0125	0.0177	NA	NA
AACCGGACCCTGCCTCTTCATCA	23H-RNA	Y57G11C.1145_hairpin		0	20	26	0	0		1-3	0	4	0	0		0.0667	0.0943	NA	NA
AATGACTACTGTAGCGCTTGTG	23H-RNA	CELE1		0	20	180	0	30		1-3	0	0	0	0		0	0	NA	NA
AGACGCAGGGCTGGTCGCGATG	23H-RNA	Y57G11C.51		0	20	24	0	2		1-3	0	0	0	0		0	0	NA	NA
AGTGGATGACGACGACGATGGC	23H-RNA	Y57G11C.1145_hairpin		0	20	38	0	2		1-3	0	32	2	0		0.2286	0.3232	0.5	0.7071
CACGCCATCATCCACATCATCCT	23H-RNA	Y57G11C.1145_hairpin		0	20	14	0	0		1-3	0	2	0	0		0.0625	0.0884	NA	NA
CATCCCGATCGTTCGTCGTCGCC	23H-RNA	ChrX_intergenic1		0	20	41	5	3		1-3	0	0	0	0		0	0	0	0
CCGATTTCTGCCCCCCCAAAAT	23H-RNA	PAL8C		0	20	108	0	0		1-3	0	0	0	0		0	0	NA	NA
CGACGATGGCTGCGGCGAGGATGA	23H-RNA	Y57G11C.1145_hairpin		0	20	132	0	0		1-3	0	8	0	0		0.0286	0.0404	NA	NA
CTGTTCTGCTCTCTCTTTCAGCTC	23H-RNA	F55A4.9, rncs-1		0	20	92	0	0		1-3	0	0	0	0		0	0	NA	NA
CTTCTGATCCTAGATGAACAATG	23H-RNA	24F12A.4, H15N14.4, Y24F12A.3		0	20	20	0	0		1-3	0	0	0	0		0	0	NA	NA
TAGAACGTGTCGCTTCGTCATCTG	23H-RNA	F55A4.9, rncs-1		0	20	64	0	0		1-3	6	66	0	0		0.3692	0.1958	NA	NA
TATTCCTGATGCGGCGCCGGCT	23H-RNA	T05E12.8		0	20	22	1	1		1-3	0	0	0	0		0	0	0	0
TCCACGCCATCATCCACATCATCC	23H-RNA	Y57G11C.1145_hairpin		0	20	8	0	0		1-3	0	0	0	0		0	0	NA	NA
TCTCTCGTAGAACGTGTCGCTTC	23H-RNA	F55A4.9, rncs-1		0	20	28	0	0		1-3	1	3	0	0		0.0722	0.0348	NA	NA
TTAAAGTTGATGGACGGCGAGATT	23H-RNA	PALTTAA1		0	20	30	0	0		1-3	0	0	0	0		0	0	NA	NA
TTTCTGTCATCACCCGCGGGGC	23H-RNA	dnj-27_element		0	20	55	0	0		1-3	0	0	0	0		0	0	NA	NA
AAGTGCCACCGTGTCTGGTCTCC	23H-RNA	ZK402.3		0	19	18	0	0		1-3	0	0	0	0		0	0	NA	NA
ATGCTCGTCGATCCAGTTTGGCC	23H-RNA	F55A4.9, rncs-1		0	19	30	0	0		1-3	3	7	0	0		0.1628	0.0374	NA	NA
CGTCGTCGTCATCCACTCCACC	23H-RNA	Y57G11C.1145_hairpin		0	19	64	2	4		1-3	1	1	0	0		0.0327	0.0245	0	0
GTCGTCGTCATCCACTCCACCG	23H-RNA	Y57G11C.1145_hairpin		0	19	37	0	1		1-3	0	0	0	0		0	0	NA	NA
TCTCTCGATGCTCGTCGATCCAG	23H-RNA	F55A4.9, rncs-1		0	19	61	0	1		1-3	18	30	0	0		0.4081	0.1109	NA	NA
TTCAAACATTCGGCAATGGGGTA	23H-RNA	Y37E3.30		0	19	62	1	1		1-3	0	4	0	0		0.0303	0.0429	0	0
AGCGACACGTTCTACGAGGGA	23H-RNA	F55A4.9, rncs-1		0	18	24	0	0		1-3	0	1	0	0		0.02	0.0283	NA	NA
CATGACGGTTTGATCTACAAA	23H-RNA	CELE14B		0	18	18	0	0		1-3	0	0	0	0		0	0	NA	NA
CCAAACTGGATTGACGAGCATC	23H-RNA	F55A4.9, rncs-1		0	18	54	0	0		1-3	4	0	0	0		0.0909	0.1286	NA	NA
CCGCGCGCCGCTATGTTTAACTT	23H-RNA	PALTA3		0	18	10	0	0		1-3	0	0	0	0		0	0	NA	NA
CGATGGCTGCGGCGAGGATGATGT	23H-RNA	Y57G11C.1145_hairpin		0	18	418	0	0		1-3	4	28	0	0		0.1223	0.0842	NA	NA
CGCGCGCCGCTATGTTTAACTT	23H-RNA	PALTA3		0	18	28	0	0		1-3	0	0	0	0		0	0	NA	NA
TAAACATAGCGGCGCGCGGAACA	23H-RNA	PALTA3		0	18	45	0	0		1-3	0	0	0	0		0	0	NA	NA
TCCGCGCGTCGCTATGTTTAACT	23H-RNA	PALTA3		0	18	87	0	0		1-3	0	0	0	0		0	0	NA	NA
TGAGGTGTTGGTGCTGATGGCA	23H-RNA	C36A4.14		0	18	13	0	1		1-3	0	0	0	0		0	0	NA	NA
TGGCTGCGGCGAGGATGATGTG	23H-RNA	Y57G11C.1145_hairpin		0	18	90	0	0		1-3	0	2	0	0		0.0109	0.0154	NA	NA
TGGGCGGGGCCAATCCGGAATGC	23H-RNA	Y24F12A.3, Y24F12A.4		0	18	34	0	0		1-3	0	0	0	0		0	0	NA	NA
TGTAGATCAAACCGTCATGGG	23H-RNA	CELE14B		0	18	36	0	0		1-3	0	0	0	0		0	0	NA	NA
TGTTCTGCTCTCTCTTTCAGC	23H-RNA	F55A4.9, rncs-1		0	18	34	0	0		1-3	0	0	0	0		0	0	NA	NA
TTGCTTTCCTCATCTCTGATCT	23H-RNA	F55A4.9, rncs-1		0	18	36	0	0		1-3	4	3	0	0		0.1294	0.0742	NA	NA
AACTTAAAACCAACAATGAACA	23H-RNA	Y36E3A.2		0	17	10	0	0		1-3	1	0	0	0		0.0278	0.0393	NA	NA
AAGAAGAAGCATCACGTCGTTT	23H-RNA	Y17D7C.3		0	17	15	0	0		1-3	0	0	0	0		0	0	NA	NA
CGACACGTTCTACGAGGGAATT	23H-RNA	F55A4.9, rncs-1		0	17	35	1	0		1-3	7	7	0	0		0.2292	0.0884	NA	NA
TCATCTCTGATCTTTTCCAAT	23H-RNA	F55A4.9, rncs-1		0	17	31	0	0		1-3	0	2	0	0		0.0303	0.0429	NA	NA
TGAAAGGATCGGGACGATTAGG	23H-RNA	ChrX_intergenic1		0	17	62	0	0		1-3	0	1	0	0		0.0079	0.0112	NA	NA
TTTTGAAAGTTCTACCGTTCTC	23H-RNA	F34D6.11, linc-12		0	17	19	0	0		1-3	0	0	0	0		0	0	NA	NA
AAAAAATATGGATAAGATGATG	23H-RNA	F55A4.9, rncs-1		0	16	82	0	0		1-3	6	22	0	0		0.2421	0.0433	NA	NA
AACGTGTCGCTTCGTCATCTGA	23H-RNA	F55A4.9, rncs-1		0	16	64	0	0		1-3	0	0	0	0		0	0	NA	NA
AAGACATCTCAGAAACATCGGCAA	23H-RNA	F43E2.6		0	16	48	0	0		1-3	35	92	0	1		0.6717	0.0206	NA	NA
AATTGTCGGCCGCTGTGGAAACC	23H-RNA	ChrV_unknown_hairpin1		0	16	30	0	0		1-3	8	0	0	0		0.1667	0.2357	NA	NA
AGAAACTTGGACTTTTTCGCTGG	23H-RNA	F55A4.9, rncs-1		0	16	23	1	0		1-3	5	60	1	0		0.4805	0.3428	NA	NA
AGAGTGACAGACATCCGGGACCT	23H-RNA	Unknown_RE2		0	16	76	0	0		1-3	0	0	0	0		0	0	NA	NA
ATACAATGAAAACAACACTTTTG	23H-RNA	F23B2.9		0	16	6	0	0		1-3	1	0	0	0		0.0294	0.0416	NA	NA
CAACGTCTCGGCTAGCCACCTA	23H-RNA	T05E12.8		0	16	32	0	1		1-3	0	0	0	0		0	0	NA	NA
CCCTTTGTACACACCGCCCGTCG	23H-RNA	F31C3.7, F31C3.8, rrn-1.1, rrn-1.2		0	16	18	4	4		1-3	0	0	0	0		0	0	0	0
CCGGCCCTTACCGTTTAATAC	23H-RNA	mir-5592		0	16	50	0	0		1-3	0	0	0	0		0	0	NA	NA
CGATGCTCGTCGATCCAGTTTGG	23H-RNA	F55A4.9, rncs-1		0	16	60	0	0		1-3	10	9	0	0		0.2575	0.1797	NA	NA
CGATGTTTCTGAGATGTCTTCACA	23H-RNA	F43E2.6		0	16	45	1	0		1-3	0	0	3	0		0	0	NA	NA
CTAGTCAATTCTCTCGTAGAACG	23H-RNA	F55A4.9, rncs-1		0	16	39	0	0		1-3	26	32	0	1		0.5349	0.119	NA	NA
CTCCAGTCCGCTTGGCCAAACT	23H-RNA	F55A4.9, rncs-1		0	16	10	0	0		1-3	6	4	0	0		0.2792	0.0092	NA	NA
TCTCGTAGAACGTGTCGCTTCGT	23H-RNA	F55A4.9, rncs-1		0	16	66	0	0		1-3	0	10	0	0		0.0658	0.093	NA	NA
TGATGCGGTTGTTCCAAAGAATCC	23H-RNA	F55A4.9, rncs-1		0	16	82	1	0		1-3	0	14	1	0		0.0729	0.1031	NA	NA
TTTCTGTCATCACCCGCGGGGCC	23H-RNA	dnj-27_element		0	16	8	0	0		1-3	4	0	0	0		0.1	0.1414	NA	NA
TTTGGCCAAGCGGACTGGAGCA	23H-RNA	F55A4.9, rncs-1		0	16	20	0	2		1-3	8	2	0	0		0.2121	0.1714	NA	NA
TTTTCGGGGTACGGTATCTAAT	23H-RNA	ChrIII_hairpin2		0	16	44	2	0		1-3	0	2	0	0		0.0217	0.0307	NA	NA
AGAAGACCATTAGACAGCACCC	23H-RNA	K06C4.23, other		0	15	45	0	0		1-3	5	5	0	0		0.175	0.1061	NA	NA
AGGCACAGTTCTGTGGGCGGGG	23H-RNA	24F12A.4, H15N14.4, H37A05.4, Y24F12A.3		0	15	80	0	0		1-3	0	0	0	0		0	0	NA	NA
ATCTCTGATCTTTTCCAATTCTT	23H-RNA	F55A4.9, rncs-1		0	15	25	0	0		1-3	0	0	0	0		0	0	NA	NA
ATGGCAGCCGATGTGAATGAAGA	23H-RNA	T05E12.8		0	15	26	0	0		1-3	1	0	0	0		0.0313	0.0442	NA	NA
CATCGTCCGATTGGTGAAACCA	23H-RNA	Y17D7C.3		0	15	19	0	0		1-3	0	2	0	0		0.0476	0.0673	NA	NA
CGCGCGGTTTGGTCCAGTCTCC	23H-RNA	E01G4.5		0	15	34	3	1		1-3	0	0	0	0		0	0	0	0
GACGTACCAACTGGAGGCCCA	23H-RNA	F31C3.11, rrn-2.1		0	15	8	4	3		1-3	0	2	4	0		0.1	0.1414	0.25	0.3536
TCAAACATTCGGCAATGGGGTA	23H-RNA	Y37E3.30		0	15	2	0	0		1-3	0	0	0	0		0	0	NA	NA
TCTTAGAACCCATATATACCCCCT	23H-RNA	Y116F11A.1		0	15	14	0	0		1-3	0	0	0	0		0	0	NA	NA
ACTTCTTCCACGCCATCATCC	23H-RNA	Y57G11C.1145_hairpin		0	14	12	0	0		1-3	2	0	0	0		0.0625	0.0884	NA	NA
AGACATCTCAGAAACATCGGCAAA	23H-RNA	F43E2.6		0	14	32	0	0		1-3	29	103	0	0		0.7187	0.0626	NA	NA
AGAGGTCCAAGTAAGATGATAG	23H-RNA	F39E9.7		0	14	6	0	1		1-3	0	0	0	0		0	0	NA	NA
ATTGAGACCAGTGATAGCGACC	23H-RNA	F19G12.2, F58F9.1		0	14	30	0	0		1-3	2	0	0	0		0.0625	0.0884	NA	NA
CACATCATCCTCGCCGCAGCCAT	23H-RNA	Y57G11C.1145_hairpin		0	14	10	0	0		1-3	0	10	0	0		0.25	0.3536	NA	NA
CATCATCCTCGCCGCAGCCAT	23H-RNA	Y57G11C.1145_hairpin		0	14	64	0	0		1-3	8	18	0	0		0.2916	0.1019	NA	NA
CCCCATTGCCGAATGTTTGAATC	23H-RNA	Y37E3.30		0	14	31	2	7		1-3	0	0	0	0		0	0	0	0
CGACGGATCAGTGTTGCCACT	23H-RNA	T05E12.8		0	14	4	1	0		1-3	0	0	0	0		0	0	NA	NA
CGAGGATGATGTGGATGATGG	23H-RNA	Y57G11C.1145_hairpin		0	14	26	0	0		1-3	0	0	0	0		0	0	NA	NA
CGTGTCGCTTCGTCATCTGATGC	23H-RNA	F55A4.9, rncs-1		0	14	156	0	0		1-3	0	4	0	0		0.0125	0.0177	NA	NA
GCCCTTTGTACACACCGCCCGTC	23H-RNA	F31C3.7, F31C3.8, rrn-1.1, rrn-1.2		0	14	34	4	12		1-3	0	0	0	0		0	0	0	0
TATTTGGAACAGAAGCAAGAGGA	23H-RNA	F19B2.5		0	14	16	0	0		1-3	0	0	0	0		0	0	NA	NA
TCATCAGCTCCATCAACACCA	23H-RNA	C36A4.14		0	14	3	0	0		1-3	1	0	0	0		0.0333	0.0471	NA	NA
TCCTCATCTCTGATCTTTTCCAA	23H-RNA	F55A4.9, rncs-1		0	14	51	0	0		1-3	3	7	0	0		0.1486	0.0394	NA	NA
TTCGTTCTTGGTGAAAAAAGTG	23H-RNA	E01G4.7		0	14	29	5	4		1-3	0	0	0	0		0	0	0	0
TTGCCTCTGAATGCCGAGTAGG	23H-RNA	other		0	14	36	2	0		1-3	0	2	0	0		0.0263	0.0372	NA	NA
TTTCGAAACCGTGCGGCAGTTG	23H-RNA	DNA-8-1		0	14	14	0	0		1-3	0	0	0	0		0	0	NA	NA
TTTCGGGGTACGGTATCTAATAG	23H-RNA	ChrIII_hairpin2		0	14	26	0	0		1-3	0	0	0	0		0	0	NA	NA
TTTGGCCAAGCGGACTGGAGCAC	23H-RNA	F55A4.9, rncs-1		0	14	116	0	2		1-3	16	126	0	0		0.527	0.009	NA	NA
AAAGAATCCATTGTCCAGCTCCA	23H-RNA	F55A4.9, rncs-1		0	13	26	2	0		1-3	2	0	0	0		0.0667	0.0943	NA	NA
ACCACTTCCGCAGACGCTACA	23H-RNA	Y37E3.30		0	13	37	0	1		1-3	0	0	0	0		0	0	NA	NA
ATCGGACGAGCTCTTATCCCCT	23H-RNA	T05E12.8		0	13	47	6	3		1-3	0	0	0	0		0	0	0	0
CAAAATACCAGATTGTCCTTCA	23H-RNA	F39E9.29_region		0	13	3	0	0		1-3	1	0	0	0		0.0357	0.0505	NA	NA
CGATGTTTCTGAGATGTCTTCA	23H-RNA	F43E2.6		0	13	10	0	0		1-3	0	1	0	0		0.0455	0.0643	NA	NA
CTCGGCATTCAGAGGCAACTTCT	23H-RNA	npr-34, Y54E2A.1		0	13	11	0	0		1-3	6	16	0	0		0.4542	0.1957	NA	NA
GCCCTTACCGTTTAATACATGTT	23H-RNA	mir-5592		0	13	11	0	0		1-3	0	3	0	0		0.1071	0.1515	NA	NA
TCTTTCATCGTACGACGCTGTT	23H-RNA	F52G3.8		0	13	17	0	2		1-3	0	0	0	0		0	0	NA	NA
TGCGACGGATCAGTGTTGCCACT	23H-RNA	T05E12.8		0	13	32	0	0		1-3	0	0	0	0		0	0	NA	NA
TGGAAACGTCAAGAAGTTTGATC	23H-RNA	F52G3.8		0	13	43	0	0		1-3	1	4	0	0		0.0783	0.0097	NA	NA
TGGTGGAGCTGGACGATGGATT	23H-RNA	F55A4.9, rncs-1		0	13	28	0	0		1-3	0	3	0	0		0.0484	0.0684	NA	NA
TTCCCTTTATGTCGCACTTGCGC	23H-RNA	T05E12.10		0	13	38	0	0		1-3	0	0	0	0		0	0	NA	NA
TTGATCTCTATGCGACCCCACAC	23H-RNA	T05E12.10		0	13	8	2	0		1-3	0	0	0	0		0	0	NA	NA
AAAAAAGAACTGAAGAGAGTG	23H-RNA	C05E7.1, C05E7.t3		0	12	15	0	0		1-3	0	0	0	0		0	0	NA	NA
AATACCTAACGAGACCCAACTTT	23H-RNA	PALTA3		0	12	6	0	0		1-3	0	0	0	0		0	0	NA	NA
AGAGGTCCAAGTAAGATGATA	23H-RNA	F39E9.7		0	12	37	5	0		1-3	0	0	0	0		0	0	NA	NA
AGTGACAGACATCCGGGACCT	23H-RNA	Unknown_RE2		0	12	8	0	0		1-3	0	0	0	0		0	0	NA	NA
CAGCCGGCCCTTACCGTTTAATA	23H-RNA	mir-5592		0	12	4	0	0		1-3	0	0	0	0		0	0	NA	NA
CCTCATACCGCGTATCTATTC	23H-RNA	F47E1.18, linc-22		0	12	18	0	0		1-3	0	0	0	0		0	0	NA	NA
CGACGACGATGGCTGCGGCGAGGA	23H-RNA	Y57G11C.1145_hairpin		0	12	122	2	0		1-3	0	16	0	0		0.058	0.082	NA	NA
CGATGGATTCTTTGGAGCAACCG	23H-RNA	F55A4.9, rncs-1		0	12	33	0	0		1-3	3	0	0	0		0.1	0.1414	NA	NA
CTCATCTCTGATCTTTTCCAATT	23H-RNA	F55A4.9, rncs-1		0	12	77	2	0		1-3	6	4	0	0		0.1914	0.2008	NA	NA
CTGAGGATTTTGAGTGAGGCTGA	23H-RNA	M4.2, puf-4		0	12	75	0	0		1-3	0	0	0	0		0	0	NA	NA
CTTTCAGCATCGACCACGGCTTT	23H-RNA	F55A4.9, rncs-1		0	12	26	0	0		1-3	0	0	0	0		0	0	NA	NA
GAAGAGCCGACATCGAAGGATCA	23H-RNA	F31C3.10, F31C3.9, rrn-3.1, rrn-3.56		0	12	10	6	0		1-3	0	0	0	0		0	0	NA	NA
TAAACATAGCGGCGCGCGGAACT	23H-RNA	PALTA3, talp-3, Y48A6C.4, Y57G11C.32		0	12	28	0	0		1-3	4	4	0	0		0.1875	0.0884	NA	NA
TAACAGGGATGAAGTAACGCCA	23H-RNA	other		0	12	22	0	0		1-3	0	0	0	0		0	0	NA	NA
TCAATAAAAACAATGGACAACTG	23H-RNA	Y59H11AR.6		0	12	35	0	0		1-3	1	0	0	0		0.0385	0.0544	NA	NA
TCATCCTCGCCGCAGCCATCGTCG	23H-RNA	Y57G11C.1145_hairpin		0	12	32	0	0		1-3	8	10	0	0		0.319	0.1145	NA	NA
TCATCTAAACAACCGTACTGGA	23H-RNA	F31C3.9, rrn-3.1		0	12	9	0	1		1-3	1	0	1	0		0.0385	0.0544	0.5	0.7071
TCGCCGCAGCCATCGTCGTCGTC	23H-RNA	Y57G11C.1145_hairpin		0	12	34	0	0		1-3	70	114	0	0		0.812	0.059	NA	NA
TCTCAATGGAAAATTCTGCATG	23H-RNA	F31A9.2		0	12	37	0	1		1-3	0	0	0	0		0	0	NA	NA
TCTGAGATGTCTTCACAATTCTC	23H-RNA	F43E2.6		0	12	15	0	0		1-3	2	5	0	0		0.1964	0.0758	NA	NA
TGCGGCGAGGATGATGTGGATGA	23H-RNA	Y57G11C.1145_hairpin		0	12	44	0	0		1-3	0	0	0	0		0	0	NA	NA
TGCTCGTCGATCCAGTTTGGCCA	23H-RNA	F55A4.9, rncs-1		0	12	50	0	0		1-3	6	13	0	0		0.2698	0.0898	NA	NA
TGGCCAAGCGGACTGGAGCACA	23H-RNA	F55A4.9, rncs-1		0	12	8	0	0		1-3	4	4	0	0		0.2917	0.0589	NA	NA
TGTGCTGAGCTCTTGGATGATC	23H-RNA	puf-10, Y48G1BL.3		0	12	43	0	0		1-3	0	1	0	0		0.0114	0.0161	NA	NA
TGTTCCCTGTGGAGACCCTCACC	23H-RNA	other, Y116A8B.1		0	12	22	0	0		1-3	0	0	0	0		0	0	NA	NA
TTCTACAAAAGGGACGCCGGAAA	23H-RNA	mtd-1, other, ZK337.5		0	12	9	0	0		1-3	9	9	0	0		0.4643	0.0505	NA	NA
TTTCGGGGTACGGTATCTAAT	23H-RNA	ChrIII_hairpin2		0	12	80	0	0		1-3	0	0	0	0		0	0	NA	NA
TTTGATCTACCTGTTGAACTTGA	23H-RNA	other		0	12	26	0	0		1-3	1	0	0	0		0.0385	0.0544	NA	NA
TTTTCGGGGTACGGTATCTAATA	23H-RNA	ChrIII_hairpin2		0	12	8	2	2		1-3	4	18	0	0		0.4712	0.3128	0	0
AAACTGGATTGACGAGCATCGAG	23H-RNA	F55A4.9, rncs-1		0	11	34	0	1		1-3	0	0	0	0		0	0	NA	NA
AAACTGTATTACGGTGGAGTCT	23H-RNA	other		0	11	2	1	0		1-3	2	0	0	0		0.0769	0.1088	NA	NA
AATACCACGGGCGATGCCAAATC	23H-RNA	T05E12.8		0	11	20	1	0		1-3	0	0	0	0		0	0	NA	NA
AATTCCACTTGGGGTAAATTCG	23H-RNA	C36A4.14		0	11	12	2	0		1-3	0	2	0	0		0.0714	0.101	NA	NA
ATGTATGGAGGACGAACACAAC	23H-RNA	C36A4.14		0	11	6	2	0		1-3	0	0	0	0		0	0	NA	NA
CAAGTGCGACATAAAGGGAACA	23H-RNA	T05E12.10		0	11	4	2	1		1-3	0	0	1	0		0	0	0.1667	0.2357
CATTCCTACGACATGGAGGTCCCT	23H-RNA	C40A11.10, mir-8199		0	11	34	0	0		1-3	0	0	0	0		0	0	NA	NA
CCAAACTGGATTGACGAGCAT	23H-RNA	F55A4.9, rncs-1		0	11	29	0	0		1-3	0	1	0	0		0.0167	0.0236	NA	NA
GACATCTCAGAAACATCGGCAAA	23H-RNA	F43E2.6		0	11	50	0	0		1-3	48	73	0	0		0.7035	0.1556	NA	NA
GTGAAGACATCTCAGAAACATCG	23H-RNA	F43E2.6		0	11	47	5	5		1-3	70	116	1	1		0.7879	0.1079	0.1667	0
TCCCGCATTTCTTGTAGATCACA	23H-RNA	H24K24.4, trm-2A		0	11	46	0	0		1-3	0	0	0	0		0	0	NA	NA
TGGACCATCCGCAACAGTGATA	23H-RNA	F57G8.14, F57G8.15, linc-59		0	11	36	0	0		1-3	0	0	0	0		0	0	NA	NA
TTTCCTCATCTCTGATCTTTTC	23H-RNA	F55A4.9, rncs-1		0	11	90	0	0		1-3	3	2	0	0		0.118	0.1362	NA	NA
AAACCGCCGGAATTTTCAGCC	23H-RNA	other		0	10	3	0	0		1-3	0	0	0	0		0	0	NA	NA
AAGCACGCCGTCTCTGAGGGAAC	23H-RNA	other		0	10	20	0	0		1-3	0	0	0	0		0	0	NA	NA
AAGCGACACGTTCTACGAGGGA	23H-RNA	F55A4.9, rncs-1		0	10	15	0	0		1-3	0	1	0	0		0.0313	0.0442	NA	NA
AGAGCTTATGCCCTATGTATGG	23H-RNA	F31C3.10, F31C3.9, rrn-3.1, rrn-3.56		0	10	8	0	0		1-3	0	0	0	0		0	0	NA	NA
AGCATCGAGAAACTTGGACTTTT	23H-RNA	F55A4.9, rncs-1		0	10	34	0	0		1-3	3	2	0	0		0.1432	0.1239	NA	NA
AGTTCAAGTCTCTCGATGCTCG	23H-RNA	F55A4.9, rncs-1		0	10	30	0	0		1-3	4	1	0	0		0.159	0.1792	NA	NA
CAATCAAAGGATAGTCTCAACA	23H-RNA	F31C3.10, F31C3.9, rrn-3.1, rrn-3.56		0	10	10	0	0		1-3	0	0	0	0		0	0	NA	NA
CACTTACCAGCACACAGAGACG	23H-RNA	Y57G11C.51		0	10	5	1	1		1-3	1	0	0	1		0.0455	0.0643	0.25	0.3536
CATAGGAAATAGATCTAGAACTT	23H-RNA	F58A6.9		0	10	13	0	0		1-3	0	3	0	0		0.0938	0.1326	NA	NA
CCACCGTGTCTGGTCTCCTCGC	23H-RNA	ZK402.3		0	10	8	0	0		1-3	0	0	0	0		0	0	NA	NA
CCACGCCATCATCCACATCATCC	23H-RNA	Y57G11C.1145_hairpin		0	10	4	0	0		1-3	2	0	0	0		0.0833	0.1179	NA	NA
CCGCCCACAGTTCTGTACCTTG	23H-RNA	Y24F12A.3, Y24F12A.4		0	10	68	2	0		1-3	0	2	0	0		0.0143	0.0202	NA	NA
CGGACGGGAGCCAAGTTTGCACC	23H-RNA	other		0	10	14	2	0		1-3	0	4	0	0		0.1111	0.1571	NA	NA
CGGCGAGGATGATGTGGATGATG	23H-RNA	Y57G11C.1145_hairpin		0	10	40	0	0		1-3	0	0	0	0		0	0	NA	NA
CGTATATTCTCTATTAGTGCTGT	23H-RNA	other, ZK792.4		0	10	14	0	0		1-3	0	0	0	0		0	0	NA	NA
CGTGGAAGAAGTTGATGAAGAGG	23H-RNA	Y57G11C.1145_hairpin		0	10	42	0	0		1-3	24	38	0	0		0.5904	0.1633	NA	NA
CTCGCCGCAGCCATCGTCGTCG	23H-RNA	Y57G11C.1145_hairpin		0	10	42	2	0		1-3	0	0	0	0		0	0	NA	NA
CTCGTAGAACGTGTCGCTTCGTC	23H-RNA	F55A4.9, rncs-1		0	10	7	0	0		1-3	1	14	0	0		0.3788	0.4071	NA	NA
CTCTCTCTTTCAGCTCAATGCC	23H-RNA	F55A4.9, rncs-1		0	10	30	0	0		1-3	0	0	0	0		0	0	NA	NA
CTTTTTTCACCAAGAACGAAACC	23H-RNA	E01G4.7		0	10	18	3	7		1-3	0	0	0	1		0	0	0.0625	0.0884
GAAGAATGCTGGAACACGTCGT	23H-RNA	Y37E3.30		0	10	11	0	1		1-3	0	3	0	1		0.1071	0.1515	NA	NA
GTTTGGCCAAGCGGACTGGAGC	23H-RNA	F55A4.9, rncs-1		0	10	22	0	0		1-3	0	0	0	0		0	0	NA	NA
TACGTTTACATGGAGGTCCCGC	23H-RNA	F39E9.29_region, F39E9.7		0	10	6	0	0		1-3	0	0	0	0		0	0	NA	NA
TAGGATAATGTCTGGAAATACGG	23H-RNA	B0281.4		0	10	11	1	0		1-3	0	2	0	0		0.0769	0.1088	NA	NA
TCTCCTCGTCGAAATCAAAAGG	23H-RNA	Y105C5A.14		0	10	20	0	0		1-3	0	0	0	1		0	0	NA	NA
TGAAAGGATCGGGACGATTAGGA	23H-RNA	ChrX_intergenic1		0	10	57	0	0		1-3	1	5	0	0		0.0858	0.0073	NA	NA
TGATGGCGTGGAAGAAGTTGA	23H-RNA	Y57G11C.1145_hairpin		0	10	62	2	0		1-3	2	60	0	2		0.3292	0.2299	0.5	0.7071
TGGACTTTTTCGCTGGTTTGGTG	23H-RNA	F55A4.9, rncs-1		0	10	53	0	0		1-3	0	0	0	0		0	0	NA	NA
TGGTCTTTGAGTTTCCGATTTCG	23H-RNA	Y17D7C.3		0	10	54	0	1		1-3	0	0	0	0		0	0	NA	NA
TGTTTCTGAGATGTCTTCACA	23H-RNA	F43E2.6		0	10	26	0	0		1-3	0	0	0	0		0	0	NA	NA
TTCTGTCATCACCCGCGGGGC	23H-RNA	dnj-27_element		0	10	15	0	0		1-3	0	0	0	0		0	0	NA	NA
TTGATCTCTATGCGACCCCACA	23H-RNA	T05E12.10		0	10	18	2	3		1-3	0	0	0	0		0	0	0	0
TTTCGGGGTACGGTATCTAATA	23H-RNA	ChrIII_hairpin2		0	10	8	0	0		1-3	0	12	0	0		0.3	0.4243	NA	NA
TTTCGTTCTTGGTGAAAAAAGTG	23H-RNA	E01G4.7		0	10	33	0	0		1-3	0	0	0	0		0	0	NA	NA
TTTCTGAGATGTCTTCACAAT	23H-RNA	F43E2.6		0	10	40	0	1		1-3	0	0	0	0		0	0	NA	NA
TTTCTGTCATCACCCGCGGGGCT	23H-RNA	other		0	10	5	0	0		1-3	0	0	0	0		0	0	NA	NA
AAAATGGACGACGTGCTCGACAG	23H-RNA	C14B1.7		0	9	23	0	0		1-3	2	0	0	0		0.0909	0.1286	NA	NA
AGAGTGTAGTCAGCTGAAGAGAC	23H-RNA	rft-2, Y47D7A.14_IR, Y47D7A.14_IR_element		0	9	12	0	0		1-3	0	3	0	0		0.1	0.1414	NA	NA
AGCAGACGCTCATGACCACTT	23H-RNA	Y17D7B.4		0	9	3	0	0		1-3	0	0	0	0		0	0	NA	NA
ATCGTCGTCGTCATCCACTCCACC	23H-RNA	Y57G11C.1145_hairpin		0	9	39	0	0		1-3	1	0	0	0		0.05	0.0707	NA	NA
ATGTTTCTGAGATGTCTTCACAA	23H-RNA	F43E2.6		0	9	40	0	0		1-3	3	14	0	0		0.2546	0.0065	NA	NA
CAAACTGGATTGACGAGCATCG	23H-RNA	F55A4.9, rncs-1		0	9	49	0	3		1-3	0	10	0	0		0.0847	0.1198	NA	NA
CAATGAAAACAACACTTTTGGT	23H-RNA	F23B2.9		0	9	15	0	0		1-3	0	0	0	0		0	0	NA	NA
CGTCTGGTTCAGGGTTGTTTA	23H-RNA	F31C3.11, rrn-2.1		0	9	8	2	1		1-3	0	0	0	0		0	0	0	0
CTCTTCAGCTGACTACACTCTCT	23H-RNA	rft-2, Y47D7A.14_IR, Y47D7A.14_IR_element		0	9	33	0	0		1-3	0	0	0	0		0	0	NA	NA
CTTCGTCATCTGATGCGGTTGTTC	23H-RNA	F55A4.9, rncs-1		0	9	47	0	1		1-3	0	0	0	0		0	0	NA	NA
GACTGGACCAAACCGCGCGCT	23H-RNA	E01G4.5		0	9	14	1	2		1-3	0	0	0	0		0	0	0	0
GGGGTATATATGGGTTCTAAGATC	23H-RNA	Y116F11A.1		0	9	107	1	0		1-3	0	0	0	0		0	0	NA	NA
TAACGAGACCGCTGAAAAAGTTC	23H-RNA	PAL5A		0	9	18	0	0		1-3	0	0	0	0		0	0	NA	NA
TAATTGGAAAAGATTAGAGATG	23H-RNA	F55A4.9, rncs-1		0	9	30	0	2		1-3	1	6	0	0		0.1333	0.0471	NA	NA
TCAGAAACATCGGCAAATGGC	23H-RNA	F43E2.6		0	9	26	0	0		1-3	0	5	0	0		0.0806	0.114	NA	NA
TCCTCGGTCTTGACGAAATCCC	23H-RNA	C36A4.14		0	9	8	0	0		1-3	0	0	0	0		0	0	NA	NA
TCGACAACTAATTCCCGAATCT	23H-RNA	T05E12.8		0	9	20	1	0		1-3	0	0	0	0		0	0	NA	NA
TGGCCAAACTGGATTGACGAG	23H-RNA	F55A4.9, rncs-1		0	9	42	0	0		1-3	5	4	0	0		0.222	0.1911	NA	NA
TGTTCGTCCTCCATACATTGCC	23H-RNA	C36A4.14		0	9	4	0	0		1-3	0	0	0	0		0	0	NA	NA
TTGGCCAAACTGGATTGACGAGC	23H-RNA	F55A4.9, rncs-1		0	9	34	0	0		1-3	0	3	0	0		0.0405	0.0573	NA	NA
AAAAATTCAAATTTAACTCCGTG	23H-RNA	Y69A2AR.16_hairpin		0	8	24	0	0		1-3	6	0	0	0		0.2143	0.303	NA	NA
AAATCGGAAACTCAAAGACCACAC	23H-RNA	Y17D7C.3		0	8	12	1	0		1-3	0	0	0	0		0	0	NA	NA
AAATTCAAATTTAACTCCGTGA	23H-RNA	Y69A2AR.16_hairpin		0	8	4	0	0		1-3	0	0	0	0		0	0	NA	NA
AAATTGTCGGCCGCCGTGGAAAA	23H-RNA	other		0	8	9	0	0		1-3	0	0	0	0		0	0	NA	NA
AGCAAGAGGAAGAGAAACAAAAG	23H-RNA	F19B2.5		0	8	62	0	0		1-3	0	14	0	0		0.0921	0.1303	NA	NA
AGCCAATATCGGACGATGAAGCC	23H-RNA	other		0	8	9	0	1		1-3	0	0	0	0		0	0	NA	NA
AGGTACAGAACTGTGGGCGGGGC	23H-RNA	Y24F12A.3, Y24F12A.4		0	8	22	0	0		1-3	0	2	0	0		0.0417	0.0589	NA	NA
ATTAGATACCGTACCCCGAAAAC	23H-RNA	ChrIII_hairpin2		0	8	10	0	2		1-3	0	0	0	0		0	0	NA	NA
CAACCGGACCCTGCCTCTTCATC	23H-RNA	Y57G11C.1145_hairpin		0	8	7	0	0		1-3	0	0	0	0		0	0	NA	NA
CAATGTATGGAGGACGAACACA	23H-RNA	C36A4.14		0	8	18	0	0		1-3	0	0	0	0		0	0	NA	NA
CACGGGGCGATCCAAGAACCT	23H-RNA	Y81B9A.5		0	8	7	1	0		1-3	0	0	0	0		0	0	NA	NA
CATCCCGATCGTTCGTCGTCGC	23H-RNA	ChrX_intergenic1		0	8	10	0	0		1-3	0	0	0	0		0	0	NA	NA
CCCGTCTAGGTGATCTTTCAACA	23H-RNA	Y37E3.30		0	8	2	0	0		1-3	0	0	0	0		0	0	NA	NA
CCTCCCGATAGAATGAATTTTC	23H-RNA	Y57G11C.1144		0	8	8	0	0		1-3	0	0	0	0		0	0	NA	NA
CGAAGAGCCGAGAAGAGAGATCA	23H-RNA	ChrIII_hairpin1		0	8	8	0	0		1-3	0	0	0	0		0	0	NA	NA
CGATGCTCGTCGATCCAGTTT	23H-RNA	F55A4.9, rncs-1		0	8	43	0	0		1-3	3	8	0	0		0.2148	0.0819	NA	NA
CTCGTCGATCCAGTTTGGCCAA	23H-RNA	F55A4.9, rncs-1		0	8	32	0	0		1-3	4	5	0	0		0.2342	0.1401	NA	NA
CTTCATCTAAGGCTAAATATCGA	23H-RNA	F31C3.9, rrn-3.1		0	8	10	2	4		1-3	0	0	0	0		0	0	0	0
GCGTGCAGCCCCGGACATCTAA	23H-RNA	F31C3.7, F31C3.8, rrn-1.1, rrn-1.2		0	8	4	0	0		1-3	0	2	0	0		0.1667	0.2357	NA	NA
TACAACGTGCAACTAAGACACCC	23H-RNA	Y37E3.30		0	8	21	0	0		1-3	1	1	0	0		0.0783	0.0464	NA	NA
TCAAAGGATCCGGTGAGGCTAA	23H-RNA	W04B5.8		0	8	8	0	0		1-3	0	0	0	0		0	0	NA	NA
TCAACTTCTTCCACGCCATCATC	23H-RNA	Y57G11C.1145_hairpin		0	8	10	0	0		1-3	2	0	0	0		0.1	0.1414	NA	NA
TCACTGTTGCGGATGGTCCAGG	23H-RNA	F57G8.14, F57G8.15, linc-59		0	8	7	0	0		1-3	0	0	0	0		0	0	NA	NA
TCGGGGACCAACCAATATCAGGT	23H-RNA	C34G6.1, H05C05.2, hpo-27		0	8	6	0	0		1-3	0	2	0	0		0.125	0.1768	NA	NA
TGCAGAGAGCCTAAGGAGCATC	23H-RNA	other		0	8	14	0	0		1-3	0	1	0	0		0.0333	0.0471	NA	NA
TGTTTTACACCGGATTGCCAGT	23H-RNA	Y116F11A.1		0	8	5	0	0		1-3	0	0	0	0		0	0	NA	NA
TTGCCTCTGAATGCCGAGTAGT	23H-RNA	IR1_CE		0	8	88	0	0		1-3	0	0	0	0		0	0	NA	NA
TTGGAATCCGCTTAACAATTGG	23H-RNA	Y105C5A.1272, Y105C5A.14		0	8	19	0	0		1-3	0	0	0	0		0	0	NA	NA
TTGGACTTTTTCGCTGGTTTGGT	23H-RNA	F55A4.9, rncs-1		0	8	62	0	0		1-3	0	0	0	0		0	0	NA	NA
TTGTCTTCCTTTTGTTTCTCTTC	23H-RNA	F19B2.5		0	8	20	0	0		1-3	0	0	0	0		0	0	NA	NA
TTTCCAATGTGCTCCAGTCCGCT	23H-RNA	F55A4.9, rncs-1		0	8	32	0	0		1-3	0	0	0	0		0	0	NA	NA
TTTCTCTTCCTCTTGCTTCTGT	23H-RNA	F19B2.5		0	8	12	0	0		1-3	0	0	0	0		0	0	NA	NA
TTTGGAACAGAAGCAAGAGGA	23H-RNA	F19B2.5		0	8	14	0	0		1-3	0	12	0	0		0.2308	0.3264	NA	NA
TTTGTTTCTCTTCCTCTTGCTTC	23H-RNA	F19B2.5		0	8	20	0	0		1-3	0	0	0	0		0	0	NA	NA
AATTGTCGGCCGCCGTGGAAAAC	23H-RNA	other		0	7	16	0	0		1-3	0	4	0	0		0.1	0.1414	NA	NA
ACATTTTCGGCCAGTGGGGCACA	23H-RNA	other		0	7	14	0	2		1-3	3	4	0	0		0.2611	0.055	NA	NA
ACCACTTCCGCAGACGCTACAA	23H-RNA	Y37E3.30		0	7	4	0	0		1-3	0	0	0	0		0	0	NA	NA
ATTGGGTCAGGGAAGTACTTCG	23H-RNA	W05H12.4		0	7	13	0	0		1-3	0	0	0	0		0	0	NA	NA
CATCGTAAGGCACCCGACACACT	23H-RNA	Y41C4A.17		0	7	5	0	0		1-3	0	0	0	0		0	0	NA	NA
CCATCGGACGAGCTCTTATCCCCT	23H-RNA	T05E12.8		0	7	20	0	0		1-3	0	0	0	0		0	0	NA	NA
CGATGCTCGTCGATCCAGTTTGGC	23H-RNA	F55A4.9, rncs-1		0	7	76	0	0		1-3	3	14	1	0		0.2278	0.1021	NA	NA
CGGAGAAATGACGAGAAATGC	23H-RNA	K07C5.13		0	7	4	0	0		1-3	0	0	0	0		0	0	NA	NA
CTATCAATACTCTATGTTTTTT	23H-RNA	C35D6.3		0	7	11	0	0		1-3	0	0	0	0		0	0	NA	NA
CTATTTTGATAAGTCACTGACAC	23H-RNA	F39E9.29_region		0	7	28	0	0		1-3	0	0	0	0		0	0	NA	NA
GAATTGTGAAGACATCTCAGAAA	23H-RNA	F43E2.6		0	7	29	3	0		1-3	1	16	0	0		0.2403	0.163	NA	NA
GGGATAAGAGCTCGTCCGATGGCG	23H-RNA	T05E12.8		0	7	4	0	0		1-3	0	0	0	0		0	0	NA	NA
TACCACCACTTTCATCGACTCTT	23H-RNA	F31C3.9, rrn-3.1		0	7	4	1	0		1-3	0	0	0	0		0	0	NA	NA
TACTGTAGCGCTGGTGTCGATTT	23H-RNA	other		0	7	7	1	0		1-3	0	2	0	0		0.1111	0.1571	NA	NA
TCATCTCAACCAAGATCTCAAC	23H-RNA	F52D2.6		0	7	2	0	0		1-3	0	0	0	0		0	0	NA	NA
TCGCGACCAGCCCTGCGTCTTGC	23H-RNA	Y57G11C.51		0	7	7	0	2		1-3	0	0	0	0		0	0	NA	NA
TCTGCGGAAGTGGTCTTCTACC	23H-RNA	Y37E3.30		0	7	20	0	3		1-3	0	1	0	0		0.0238	0.0337	NA	NA
TCTTCTCGGCTCTTCGAGCGCGT	23H-RNA	ChrIII_hairpin1		0	7	14	0	0		1-3	0	0	0	0		0	0	NA	NA
TGAAGACATCTCAGAAACATCGGC	23H-RNA	F43E2.6		0	7	29	0	0		1-3	3	20	0	0		0.3541	0.0765	NA	NA
TGGACAAGTTCAGCGCGCGAACC	23H-RNA	F39E9.29_region		0	7	2	0	0		1-3	0	0	0	0		0	0	NA	NA
TGTGAAGACATCTCAGAAACAT	23H-RNA	F43E2.6		0	7	10	0	0		1-3	1	0	0	0		0.0625	0.0884	NA	NA
TGTGGGCCCTCGCACTGTCTACC	23H-RNA	E01G4.5		0	7	6	0	0		1-3	0	0	0	0		0	0	NA	NA
TTATCTAATCTCCATGTCACCC	23H-RNA	Y37E11B.2		0	7	4	0	0		1-3	0	0	0	0		0	0	NA	NA
TTTCGTCCATACATTGAGGGAGCC	23H-RNA	F39E9.10		0	7	16	0	0		1-3	0	0	0	0		0	0	NA	NA
AAGCGGACTGGAGCACATTGGA	23H-RNA	F55A4.9, rncs-1		0	6	10	0	0		1-3	2	0	0	0		0.125	0.1768	NA	NA
AATTCTCTCGTAGAACGTGTCGCT	23H-RNA	F55A4.9, rncs-1		0	6	70	0	0		1-3	5	23	0	0		0.3509	0.1465	NA	NA
ACCACTGAACCACCGATGCGA	23H-RNA	other		0	6	6	0	0		1-3	0	0	0	0		0	0	NA	NA
ACCGGACCCTGCCTCTTCATC	23H-RNA	Y57G11C.1145_hairpin		0	6	10	0	0		1-3	0	20	0	0		0.3333	0.4714	NA	NA
ACCGGGTTAGTATTTTCAAGCA	23H-RNA	ZK1236.8		0	6	2	0	0		1-3	0	0	0	0		0	0	NA	NA
ACGATGGATTCTTTGGAGCAAC	23H-RNA	F55A4.9, rncs-1		0	6	45	0	0		1-3	1	0	0	0		0.0714	0.101	NA	NA
ATCACATAACTCCGCCCCCTGA	23H-RNA	other		0	6	5	0	0		1-3	1	0	0	0		0.0714	0.101	NA	NA
CAAACTGGATTGACGAGCATCGAG	23H-RNA	F55A4.9, rncs-1		0	6	75	1	0		1-3	0	0	0	0		0	0	NA	NA
CAATGTGCTCCAGTCCGCTTGGC	23H-RNA	F55A4.9, rncs-1		0	6	24	0	0		1-3	2	0	0	0		0.125	0.1768	NA	NA
CAGCCATCGTCGTCGTCATCCAC	23H-RNA	Y57G11C.1145_hairpin		0	6	10	0	0		1-3	0	0	0	0		0	0	NA	NA
CCCTTCTACTTGGACGGAACA	23H-RNA	Y17D7C.3		0	6	35	1	0		1-3	1	0	0	0		0.0714	0.101	NA	NA
CCGATTATTCTGGAACAAGTAT	23H-RNA	MTCE.7		0	6	4	0	0		1-3	0	0	0	0		0	0	NA	NA
CGACGACGAACGATCGGGATG	23H-RNA	ChrX_intergenic1		0	6	34	0	0		1-3	0	0	0	0		0	0	NA	NA
CGAGGATGATGTGGATGATGGCG	23H-RNA	Y57G11C.1145_hairpin		0	6	100	0	0		1-3	0	26	0	0		0.1032	0.1459	NA	NA
CGGAAACTGAAGCCCCAAAATC	23H-RNA	other		0	6	4	0	0		1-3	1	3	0	0		0.2857	0.202	NA	NA
CGGACTGGAGCACATTGGAAAAA	23H-RNA	F55A4.9, rncs-1		0	6	4	0	0		1-3	0	0	0	0		0	0	NA	NA
CGTGTCGCTTCGTCATCTGATG	23H-RNA	F55A4.9, rncs-1		0	6	92	0	0		1-3	8	0	0	0		0.2857	0.4041	NA	NA
CTCAACAGATCGCAGTATAAAA	23H-RNA	F31C3.10, F31C3.9, rrn-3.1, rrn-3.56		0	6	6	0	0		1-3	0	2	0	0		0.125	0.1768	NA	NA
CTCGGAAATTGTCGGCCGCTGTG	23H-RNA	ChrV_unknown_hairpin1, other		0	6	36	0	0		1-3	0	3	0	0		0.0385	0.0544	NA	NA
CTTCTTCCACGCCATCATCCAC	23H-RNA	Y57G11C.1145_hairpin		0	6	4	0	0		1-3	0	0	0	0		0	0	NA	NA
CTTGGACTTTTTCGCTGGTTTGG	23H-RNA	F55A4.9, rncs-1		0	6	45	0	0		1-3	0	0	0	0		0	0	NA	NA
GAATCAGAACACGGGGGCGACA	23H-RNA	hmg-1.1, Y48B6A.14		0	6	3	2	0		1-3	0	0	0	0		0	0	NA	NA
GACGGGCGGTGTGTACAAAGGG	23H-RNA	F31C3.7, F31C3.8, rrn-1.1, rrn-1.2		0	6	10	0	0		1-3	0	0	0	0		0	0	NA	NA
GGAGCTGGACGATGGATTCTT	23H-RNA	F55A4.9, rncs-1		0	6	51	0	3		1-3	0	0	0	0		0	0	NA	NA
GGATTTCGTCAAGACCGAGGAGCT	23H-RNA	C36A4.14		0	6	55	0	1		1-3	0	2	0	0		0.0175	0.0248	NA	NA
GTTTGGCCAAGCGGACTGGAGCA	23H-RNA	F55A4.9, rncs-1		0	6	16	0	0		1-3	0	0	0	0		0	0	NA	NA
TAAAGACGTGGTTTTGACGAAAA	23H-RNA	other, Y54G11A.1		0	6	30	0	0		1-3	0	0	0	0		0	0	NA	NA
TACCGTACCCCGAAAACTAGAA	23H-RNA	ChrIII_hairpin2		0	6	6	0	0		1-3	0	0	0	0		0	0	NA	NA
TACGTTTACATGGAGGTCCCGCC	23H-RNA	F39E9.29_region, F39E9.7		0	6	8	2	0		1-3	0	4	0	0		0.1667	0.2357	NA	NA
TCACGCATTTTTTGTAGATCAAA	23H-RNA	other, Y57A10A.1		0	6	16	0	0		1-3	0	0	0	0		0	0	NA	NA
TCCGCGCGCCGCTACGTTTAACT	23H-RNA	other, Y105C5A.15		0	6	9	0	0		1-3	30	6	0	0		0.6167	0.3064	NA	NA
TCCGGCGTCCCTTTTGTAGAAAA	23H-RNA	mtd-1, other, ZK337.5		0	6	24	0	0		1-3	0	0	0	0		0	0	NA	NA
TCGGAAACTGAAGCCCCAAAATC	23H-RNA	other		0	6	13	0	0		1-3	1	1	0	0		0.1071	0.0505	NA	NA
TCGGCTCTTCGAGCGCGTCTTCTT	23H-RNA	ChrIII_hairpin1		0	6	7	0	0		1-3	0	0	0	0		0	0	NA	NA
TCTACAGAGTCTGGAGAATGT	23H-RNA	C36A4.11, K06B9.6		0	6	8	2	0		1-3	0	0	0	0		0	0	NA	NA
TCTCAGAAACATCGGCAAATGGC	23H-RNA	F43E2.6		0	6	12	0	0		1-3	1	3	0	0		0.1714	0.0404	NA	NA
TCTGAGATGTCTTCACAATTC	23H-RNA	F43E2.6		0	6	2	0	0		1-3	0	0	0	0		0	0	NA	NA
TCTTCCACGCCATCATCCACATC	23H-RNA	Y57G11C.1145_hairpin		0	6	20	0	0		1-3	2	0	0	0		0.125	0.1768	NA	NA
TGCCTCTTCATCAACTTCTTCC	23H-RNA	Y57G11C.1145_hairpin		0	6	18	0	0		1-3	14	16	0	0		0.5853	0.1622	NA	NA
TGCGGCGAGGATGATGTGGATG	23H-RNA	Y57G11C.1145_hairpin		0	6	26	0	0		1-3	0	4	0	0		0.0667	0.0943	NA	NA
TGGAGTTGAATTGGAACGAGATC	23H-RNA	T05E12.10		0	6	25	2	5		1-3	0	2	0	0		0.037	0.0524	0	0
TGTGAACAGCGAGACACTATTCC	23H-RNA	Y71A12B.2, Y71A12B.3		0	6	8	0	0		1-3	0	0	0	0		0	0	NA	NA
TTAAACACAGCGGCGCGCGGAAC	23H-RNA	other		0	6	15	0	0		1-3	498	1005	0	3		0.9867	0.002	NA	NA
TTACAGTACTCCTGAAAGGCACA	23H-RNA	B0303.7		0	6	7	0	0		1-3	2	0	0	0		0.125	0.1768	NA	NA
TTAGATACCGTACCCCGAAAAC	23H-RNA	ChrIII_hairpin2		0	6	6	0	0		1-3	0	0	0	0		0	0	NA	NA
TTCCACGCCATCATCCACATC	23H-RNA	Y57G11C.1145_hairpin		0	6	4	0	0		1-3	0	0	0	0		0	0	NA	NA
TTCGCTCTCGATTCCGCATGCCG	23H-RNA	dnj-27_element		0	6	12	0	0		1-3	0	0	0	0		0	0	NA	NA
TTGCCTCTGAATGCCGAGTAGGC	23H-RNA	gopc-1, other, ZK849.2		0	6	10	0	0		1-3	0	0	0	0		0	0	NA	NA
TTTCTCTTCCTCTTGCTTCTGTT	23H-RNA	F19B2.5		0	6	14	0	0		1-3	0	0	0	0		0	0	NA	NA
AAACGGAATCGCTGTCCCGGAC	23H-RNA	F39E9.7		0	5	3	0	0		1-3	0	0	0	0		0	0	NA	NA
AAGCGACACGTTCTACGAGGG	23H-RNA	F55A4.9, rncs-1		0	5	11	0	0		1-3	0	3	0	0		0.1071	0.1515	NA	NA
AATTGTCGGCCGCCGTGGAAAA	23H-RNA	other		0	5	2	0	0		1-3	0	2	0	0		0.25	0.3536	NA	NA
ACCTCCATGTCGTAGGAATGCT	23H-RNA	C40A11.10, mir-8199		0	5	3	0	0		1-3	0	0	0	0		0	0	NA	NA
AGTCAGTTGGATGGGAAAATG	23H-RNA	W04B5.8		0	5	5	1	0		1-3	0	0	0	0		0	0	NA	NA
AGTCGGGTTGCTTGAAAGTGC	23H-RNA	F31C3.9, rrn-3.1		0	5	5	1	0		1-3	0	0	0	0		0	0	NA	NA
CACCGTCCTGCTGTCAATATCA	23H-RNA	F31C3.9, rrn-3.1		0	5	3	0	0		1-3	0	0	0	0		0	0	NA	NA
CAGACATGATCTGGAGATGTTT	23H-RNA	Y116A8B.1		0	5	16	0	0		1-3	0	0	0	0		0	0	NA	NA
CATTTCTACAAGTCTCATGTTGA	23H-RNA	M01E5.3		0	5	2	0	0		1-3	0	0	0	0		0	0	NA	NA
CCCCATTGCCGAATGTTTGAAT	23H-RNA	Y37E3.30		0	5	10	0	1		1-3	0	0	0	0		0	0	NA	NA
CCCTACTCTTCGCATCTCATC	23H-RNA	Y67D8A.2		0	5	2	0	0		1-3	0	0	0	0		0	0	NA	NA
CCTCAATGTGTGCCTGCTTCT	23H-RNA	Y37E11B.2		0	5	6	0	2		1-3	0	0	0	0		0	0	NA	NA
CGCCACGAGCGGTGGAGCCTGCA	23H-RNA	T05E12.8		0	5	5	0	0		1-3	0	0	0	0		0	0	NA	NA
CTAATCGTCCCGATCCTTTCATC	23H-RNA	ChrX_intergenic1		0	5	39	2	0		1-3	0	0	0	0		0	0	NA	NA
CTATCTACACTCTCTGTACCGA	23H-RNA	other		0	5	8	0	0		1-3	86	136	2	1		0.9447	0.0004	1	0
CTCCTCGGTCTTGACGAAATCCCA	23H-RNA	C36A4.14		0	5	31	0	0		1-3	0	0	0	0		0	0	NA	NA
CTCTCGATGCTCGTCGATCCAGT	23H-RNA	F55A4.9, rncs-1		0	5	59	0	0		1-3	5	10	0	1		0.3225	0.2511	NA	NA
CTTGAAAATACTAACCCGGTCA	23H-RNA	ZK1236.8		0	5	2	0	0		1-3	0	0	0	0		0	0	NA	NA
CTTTGAACGGCCCTTAAAACAC	23H-RNA	F31C3.9, rrn-3.1		0	5	4	1	0		1-3	0	0	0	0		0	0	NA	NA
GACATCTCAGAAACATCGGCA	23H-RNA	F43E2.6		0	5	21	0	0		1-3	1	6	0	0		0.1944	0.0393	NA	NA
GCCCGGTGTTGTACGTAGGTGG	23H-RNA	T05E12.8		0	5	17	0	0		1-3	0	0	0	0		0	0	NA	NA
GGTGAGGTGTTGGTGCTGATGGCA	23H-RNA	C36A4.14		0	5	162	1	1		1-3	0	4	0	0		0.012	0.017	0	0
GTGCCTAACTTCTCGCTCATGA	23H-RNA	F31C3.9, rrn-3.1		0	5	7	2	1		1-3	0	0	0	0		0	0	0	0
TATCTCGATACCATGTCTCACCCA	23H-RNA	Y37E11B.2		0	5	5	1	0		1-3	0	0	0	0		0	0	NA	NA
TATTTTCCGACTTCTCATGAGCC	23H-RNA	other		0	5	25	0	1		1-3	0	0	0	0		0	0	NA	NA
TCAATTGTTGTGAAGCTAGCTCC	23H-RNA	W03D2.15		0	5	18	0	0		1-3	0	0	0	0		0	0	NA	NA
TCACGTCATTATGTCACAATCCC	23H-RNA	F39F10.4		0	5	5	0	0		1-3	0	0	0	0		0	0	NA	NA
TCCGCGCGCCGCTATGTTTAACTT	23H-RNA	PALTA3		0	5	11	0	0		1-3	0	0	0	0		0	0	NA	NA
TCGTATGATGCAAGTGGAATTT	23H-RNA	F52D2.6		0	5	34	1	0		1-3	0	0	0	0		0	0	NA	NA
TCTCGTTCCAATTCAACTCCAGA	23H-RNA	T05E12.10		0	5	14	0	2		1-3	0	0	0	0		0	0	NA	NA
TCTCTCGTAGAACGTGTCGCTTCG	23H-RNA	F55A4.9, rncs-1		0	5	67	1	0		1-3	1	12	0	0		0.1593	0.0104	NA	NA
TCTCTGTGTGCTGGTAAGTGGA	23H-RNA	Y57G11C.51		0	5	6	0	0		1-3	0	0	0	0		0	0	NA	NA
TCTTCTCGGCTCTTCGAGCGCGTC	23H-RNA	ChrIII_hairpin1		0	5	19	1	0		1-3	0	0	0	0		0	0	NA	NA
TTTCTGAGATGTCTTCACAATTCT	23H-RNA	F43E2.6		0	5	14	0	0		1-3	0	5	0	0		0.1316	0.1861	NA	NA
AAAAGAGTTGATATATGTGGGC	23H-RNA	Y59H11AR.6		0	4	4	0	0		1-3	0	0	0	0		0	0	NA	NA
AAAATTCAAATTTAACTCCGTG	23H-RNA	Y69A2AR.16_hairpin		0	4	24	0	6		1-3	0	0	0	0		0	0	NA	NA
AAACATTCGGCAATGGGGTACCC	23H-RNA	Y37E3.30		0	4	12	0	0		1-3	0	0	0	0		0	0	NA	NA
AAAGAACAAGCCGTGGGCAAGCA	23H-RNA	F39E9.7, F55A4.4		0	4	20	0	0		1-3	0	0	0	0		0	0	NA	NA
AAATCGGAAACTCAAAGACCAC	23H-RNA	Y17D7C.3		0	4	6	0	0		1-3	0	0	0	0		0	0	NA	NA
AACAACCCTGAACCAGACGTA	23H-RNA	F31C3.11, rrn-2.1		0	4	5	1	0		1-3	0	0	0	1		0	0	0.5	0.7071
AAGAACAAGCCGTGGGCAAGCAC	23H-RNA	F39E9.7, F55A4.4		0	4	46	0	0		1-3	0	0	0	0		0	0	NA	NA
ACCGAGCTCACAATGATATTGC	23H-RNA	F52G3.8		0	4	22	0	0		1-3	0	2	0	0		0.0417	0.0589	NA	NA
ACCGGTACAGAGAGTGTGGATA	23H-RNA	lin-29, other, W03C9.4		0	4	6	0	0		1-3	8	18	0	0		0.7083	0.0589	NA	NA
ACTCCACCGTAATACAGTTTTCC	23H-RNA	other		0	4	14	0	0		1-3	0	0	0	0		0	0	NA	NA
ACTGCTCTACTGAATACAACACC	23H-RNA	F31C3.10, F31C3.9, rrn-3.1, rrn-3.56		0	4	4	0	0		1-3	0	0	0	0		0	0	NA	NA
ACTTGATTTCTCTGAAAATAGCA	23H-RNA	ZK430.7		0	4	16	0	1		1-3	0	0	0	0		0	0	NA	NA
AGCCGGCCCTTACCGTTTAATAC	23H-RNA	mir-5592		0	4	8	0	0		1-3	0	0	0	0		0	0	NA	NA
AGTGGGCCGAGCGATTCGCTGA	23H-RNA	Y116A8C.27		0	4	9	0	0		1-3	0	0	0	0		0	0	NA	NA
AGTTGGTTGATGCTTGTCCGG	23H-RNA	F31C3.9, rrn-3.1		0	4	14	0	4		1-3	0	0	0	0		0	0	NA	NA
ATAAATCGACGTTTCTTTCACAA	23H-RNA	hcp-1, ZK1055.1		0	4	3	0	0		1-3	0	0	0	0		0	0	NA	NA
ATCCTCGCCGCAGCCATCGTCG	23H-RNA	Y57G11C.1145_hairpin		0	4	22	0	0		1-3	6	12	0	0		0.4765	0.1747	NA	NA
ATCCTTGTACCAGTTATCTGCAA	23H-RNA	K02E2.11		0	4	6	0	0		1-3	0	0	0	0		0	0	NA	NA
ATGAACCACAAGCGAAATCGCCC	23H-RNA	Y37E3.30		0	4	7	1	0		1-3	0	0	0	0		0	0	NA	NA
ATGAAGAGGCAGGGTCCGGTTGCG	23H-RNA	Y57G11C.1145_hairpin		0	4	95	1	0		1-3	0	4	0	0		0.0202	0.0286	NA	NA
ATGTATTAAACGGTAAGGGCCGGC	23H-RNA	mir-5592		0	4	14	0	0		1-3	0	0	0	0		0	0	NA	NA
ATTAGATACCGTACCCCGAAAACT	23H-RNA	ChrIII_hairpin2		0	4	20	0	0		1-3	0	0	0	0		0	0	NA	NA
ATTCGGGAATTAGTTGTCGACAC	23H-RNA	T05E12.8		0	4	21	1	0		1-3	1	0	0	0		0.1	0.1414	NA	NA
ATTGCCAGTCGAGTCAGAAAATC	23H-RNA	Y116F11A.1		0	4	9	0	0		1-3	0	0	0	0		0	0	NA	NA
CAGCACGACGTAGACGGAAAGGA	23H-RNA	H15N14.4		0	4	8	0	0		1-3	0	0	0	0		0	0	NA	NA
CAGCCGGCCCTTACCGTTTAAT	23H-RNA	mir-5592		0	4	4	0	0		1-3	0	0	0	0		0	0	NA	NA
CAGCGAATCGCTCTGCCCACTT	23H-RNA	Y116A8C.27		0	4	9	0	0		1-3	0	0	0	0		0	0	NA	NA
CCACCGTGTCTGGTCTCCTCGCC	23H-RNA	ZK402.3		0	4	24	0	0		1-3	0	0	0	0		0	0	NA	NA
CCTTCGACATCTCTGATAACAA	23H-RNA	F58A4.3, hcp-3		0	4	9	0	0		1-3	0	0	0	0		0	0	NA	NA
CCTTGATTCTCAAAGTGCAGACC	23H-RNA	W03D2.15		0	4	13	0	0		1-3	0	0	0	0		0	0	NA	NA
CGGAATGGTTCAAAAATCGAGCC	23H-RNA	F52G3.8		0	4	5	1	0		1-3	0	0	0	0		0	0	NA	NA
CGGCGGCCGACAATTTCCGAGC	23H-RNA	Unknown_hairpin_RE2		0	4	8	0	0		1-3	0	0	0	0		0	0	NA	NA
CGTGTCGCATCTGTCCGAAGTTG	23H-RNA	other, tbc-9, Y45F10A.6		0	4	22	0	0		1-3	0	0	0	0		0	0	NA	NA
CTAATAACCGGTATACCGAATT	23H-RNA	E01G4.7		0	4	9	0	0		1-3	0	0	0	0		0	0	NA	NA
CTCGAACTCGCGACCTCTAGATC	23H-RNA	irld-17, Y46H3D.4		0	4	10	0	0		1-3	0	0	0	0		0	0	NA	NA
CTCGAATCAGTTCAGTCCCGGAT	23H-RNA	F31C3.7, F31C3.8, rrn-1.1, rrn-1.2		0	4	6	0	0		1-3	0	0	0	0		0	0	NA	NA
CTCTTGCTTCTGTTCCAAATA	23H-RNA	F19B2.5		0	4	4	0	0		1-3	0	0	0	0		0	0	NA	NA
CTCTTGCTTCTGTTCCAAATATG	23H-RNA	F19B2.5		0	4	6	0	0		1-3	0	0	0	0		0	0	NA	NA
CTTCTACATCCGTAAGAGGAACC	23H-RNA	Y17D7C.3		0	4	2	0	0		1-3	0	0	0	0		0	0	NA	NA
GAAGGCGCGCTCGAAGAGCCGAG	23H-RNA	ChrIII_hairpin1		0	4	9	0	0		1-3	0	4	0	0		0.1538	0.2176	NA	NA
GATGGTCGACAACCGACGAACA	23H-RNA	F19G12.10		0	4	2	0	0		1-3	0	0	0	0		0	0	NA	NA
GCAGCCAAAGACTGATCGATTC	23H-RNA	F31C3.9, rrn-3.1		0	4	6	1	0		1-3	0	0	0	0		0	0	NA	NA
GTTTCCAGCAGTGTCGTATGTCC	23H-RNA	F31C3.9, rrn-3.1		0	4	9	1	0		1-3	0	0	0	0		0	0	NA	NA
TAACAGGGATGAAGTAACGCC	23H-RNA	other		0	4	8	0	0		1-3	0	0	0	0		0	0	NA	NA
TAACGAGACCGCTGAAAAAGTC	23H-RNA	W09C5.9		0	4	9	0	0		1-3	0	0	0	0		0	0	NA	NA
TAATTCTGCAGCCACTTCCGAA	23H-RNA	W03D2.15		0	4	4	0	1		1-3	0	0	0	0		0	0	NA	NA
TAGCCTGAGTCTCAACCAAAAC	23H-RNA	hpo-13, Y105E8A.10		0	4	8	0	0		1-3	0	0	0	0		0	0	NA	NA
TATCCACTGAGCTATCCATGC	23H-RNA	irld-17, Y46H3D.4		0	4	5	0	0		1-3	0	0	0	0		0	0	NA	NA
TCACGGAGTTAAATTTGAATTTTT	23H-RNA	Y69A2AR.16_hairpin		0	4	96	0	0		1-3	0	4	0	0		0.02	0.0283	NA	NA
TCAGGCCGCCGACATCTCATGGA	23H-RNA	Y105C5B.11		0	4	7	1	0		1-3	75	192	0	0		0.9571	0.0109	NA	NA
TCCGGTTCAGAGCAGATGACAA	23H-RNA	Y17D7C.3		0	4	18	1	0		1-3	0	0	0	0		0	0	NA	NA
TCTCGCCGTCCATGGACTTTAAA	23H-RNA	other		0	4	3	0	0		1-3	0	0	0	0		0	0	NA	NA
TGGAAATATGACGGCTGCTACGA	23H-RNA	F53H1.4		0	4	2	0	0		1-3	0	0	0	0		0	0	NA	NA
TGGGAATGCAGAAGAAAAGAGGG	23H-RNA	other		0	4	24	0	0		1-3	0	0	0	0		0	0	NA	NA
TGTCTTCCTTTTGTTTCTCTTCC	23H-RNA	F19B2.5		0	4	6	0	0		1-3	0	0	0	0		0	0	NA	NA
TTCATTCACATCGGCTGCCATCC	23H-RNA	T05E12.8		0	4	12	0	1		1-3	0	0	0	0		0	0	NA	NA
TTCCTCATCTCTGATCTTTTCC	23H-RNA	F55A4.9, rncs-1		0	4	36	0	0		1-3	0	1	0	0		0.0135	0.0191	NA	NA
TTCCTCGTTTGGATATGTAGAAGA	23H-RNA	Y17D7C.3		0	4	10	0	0		1-3	0	0	0	0		0	0	NA	NA
TTCTACATATCCAAACGAGGAAC	23H-RNA	Y17D7C.3		0	4	9	0	0		1-3	0	0	0	0		0	0	NA	NA
TTCTTACTGTAGTCTTCGCTAAG	23H-RNA	fbxa-16, other, Y73B3A.14		0	4	20	0	0		1-3	0	0	0	0		0	0	NA	NA
TTGTGTTCGTCCTCCATACATTG	23H-RNA	C36A4.14		0	4	13	0	0		1-3	0	0	0	0		0	0	NA	NA
TTTGATACCTGGACTCTTTCC	23H-RNA	E01G4.7		0	4	2	0	0		1-3	0	0	0	0		0	0	NA	NA
TTTGGCAGCCCCCGACACTTTCG	23H-RNA	F39D8.3		0	4	7	0	0		1-3	0	0	0	0		0	0	NA	NA
AAAATAAAATGTTCTAGCTCTC	23H-RNA	E01G4.5		0	3	4	0	0		1-3	0	0	0	0		0	0	NA	NA
AACCCTGAACCAGACGTACCAA	23H-RNA	F31C3.11, rrn-2.1		0	3	3	0	0		1-3	0	0	0	0		0	0	NA	NA
AATAAAAACAATGGACAACTG	23H-RNA	Y59H11AR.6		0	3	8	0	0		1-3	0	1	0	0		0.0556	0.0786	NA	NA
AATATTTATTTCGCATCCCTCCCC	23H-RNA	Y57G11C.36, Y57G11C.51		0	3	20	0	0		1-3	0	0	0	0		0	0	NA	NA
ACAACCCTGAACCAGACGTACCA	23H-RNA	F31C3.11, rrn-2.1		0	3	15	0	0		1-3	0	1	0	0		0.0313	0.0442	NA	NA
AGGCACATTTTAAGTCGGTAGGC	23H-RNA	gmps-1, M106.4		0	3	5	0	0		1-3	0	0	0	0		0	0	NA	NA
ATCTACCTGTTGAACTTGACTCT	23H-RNA	F08B1.2, gcy-12		0	3	14	0	0		1-3	0	0	0	0		0	0	NA	NA
ATTGTCGGCCGCCGTGGAAAAC	23H-RNA	other		0	3	3	0	0		1-3	0	0	0	0		0	0	NA	NA
CAGCGTGAACTGTCGAGAGTGC	23H-RNA	linc-68, Y49F6A.10		0	3	21	0	0		1-3	0	0	0	0		0	0	NA	NA
CGTCGTCATCCACTCCACCGA	23H-RNA	Y57G11C.1145_hairpin		0	3	9	1	0		1-3	0	0	0	0		0	0	NA	NA
CGTCGTCGTCATCCACTCCACCG	23H-RNA	Y57G11C.1145_hairpin		0	3	18	0	0		1-3	0	0	0	0		0	0	NA	NA
CGTCGTCGTCATCCACTCCACT	23H-RNA	Y57G11C.1145_hairpin		0	3	17	0	0		1-3	0	0	0	0		0	0	NA	NA
CTATCTACACTCTCTGTACCGT	23H-RNA	other		0	3	4	0	0		1-3	0	0	0	0		0	0	NA	NA
CTTCAAGTTCTATTGCCGGATAT	23H-RNA	F39E9.10		0	3	5	0	0		1-3	0	0	0	0		0	0	NA	NA
CTTTGCTCTGCGTCCGACACTTT	23H-RNA	VB0395L.1		0	3	2	0	0		1-3	0	0	0	0		0	0	NA	NA
GCAAGCTGCGTTCTTCATCGAT	23H-RNA	F31C3.11, rrn-2.1		0	3	4	0	0		1-3	0	0	0	0		0	0	NA	NA
GGAGCTGGACGATGGATTCTTTG	23H-RNA	F55A4.9, rncs-1		0	3	19	0	0		1-3	0	0	0	0		0	0	NA	NA
GGCCCTTACCGTTTAATACATGT	23H-RNA	mir-5592		0	3	5	0	0		1-3	0	0	0	0		0	0	NA	NA
GGGAGGAAAGCTGGGATTATCC	23H-RNA	Y37E3.30		0	3	3	0	0		1-3	0	1	0	0		0.125	0.1768	NA	NA
GGTGAGACATGGTATCGAGATATG	23H-RNA	Y37E11B.2		0	3	105	1	0		1-3	0	3	0	0		0.0139	0.0196	NA	NA
GTGGAGCCTGCACTGTTGATTTC	23H-RNA	T05E12.8		0	3	11	1	0		1-3	0	1	0	0		0.0417	0.0589	NA	NA
TAAAGTCCATGGACGGCGAGATT	23H-RNA	other		0	3	8	0	0		1-3	0	0	0	0		0	0	NA	NA
TAGAAGACCACTTCCGCAGACGC	23H-RNA	Y37E3.30		0	3	19	0	0		1-3	0	0	0	0		0	0	NA	NA
TATACCACTCTATCAGACTACT	23H-RNA	W04C9.8		0	3	20	0	0		1-3	0	0	0	0		0	0	NA	NA
TATTGAAAATGTGGGATGACGC	23H-RNA	E01G4.7		0	3	14	0	0		1-3	0	0	0	0		0	0	NA	NA
TCAAAGGATCCGGTGAGGCTA	23H-RNA	W04B5.8		0	3	4	0	0		1-3	0	0	0	0		0	0	NA	NA
TGAGTGGCGAAAATCGGAAATT	23H-RNA	other		0	3	4	0	0		1-3	0	0	0	0		0	0	NA	NA
TGCACAGACTGAGCATTTTCCCCC	23H-RNA	other		0	3	4	0	0		1-3	0	0	0	0		0	0	NA	NA
TGTGAAGACATCTCAGAAACATC	23H-RNA	F43E2.6		0	3	19	0	0		1-3	2	7	0	0		0.3346	0.0925	NA	NA
TGTGGCCCGCGGTAATTACATCC	23H-RNA	F41F3.10		0	3	19	0	0		1-3	0	0	0	0		0	0	NA	NA
TGTTTCTGAGATGTCTTCACAAT	23H-RNA	F43E2.6		0	3	7	0	1		1-3	0	0	0	0		0	0	NA	NA
TTCTAAGTCCCTTTGATGCTC	23H-RNA	K06B9.6		0	3	4	0	0		1-3	0	0	0	0		0	0	NA	NA
TTCTACAGAAGGGACGCCGGAAA	23H-RNA	other		0	3	3	0	0		1-3	0	0	0	0		0	0	NA	NA
TTGGTGGGCCCTAGACGATTTTG	23H-RNA	MTCE.11, nduo-1		0	3	10	0	0		1-3	0	0	0	0		0	0	NA	NA
TTTTCCCATCCAACTGACTGA	23H-RNA	W04B5.8		0	3	14	0	3		1-3	0	0	0	0		0	0	NA	NA
TTTTTGATTCAAAAACTCGGAT	23H-RNA	mdt-8, Y62F5A.1		0	3	3	0	0		1-3	0	0	0	0		0	0	NA	NA
AAAATTAGCCGCCTACACAACA	23H-RNA	T05E12.10		0	2	3	0	0		1-3	0	0	0	0		0	0	NA	NA
AAAGTAAATGCGTTCGGGGGGAA	23H-RNA	Y57G11B.t1		0	2	4	0	0		1-3	0	0	0	0		0	0	NA	NA
AAGGACGGAAAGAAGAGACGC	23H-RNA	F55G1.3, his-62		0	2	3	0	0		1-3	0	0	0	0		0	0	NA	NA
AATTCTCGTTCTCTCCACACAC	23H-RNA	R119.7, rnp-8		0	2	4	0	0		1-3	0	1	0	0		0.1	0.1414	NA	NA
ACCATCCGGATGCTTCATGTTTC	23H-RNA	E01G4.7		0	2	7	0	0		1-3	0	0	0	0		0	0	NA	NA
ACCTACGTACAACACCGGGCTC	23H-RNA	T05E12.8		0	2	8	0	1		1-3	0	0	0	0		0	0	NA	NA
ACGTGTTCCAGCATTCTTCGA	23H-RNA	Y37E3.30		0	2	3	0	0		1-3	0	0	0	0		0	0	NA	NA
AGACCACTTCCGCAGACGCTACA	23H-RNA	Y37E3.30		0	2	3	0	0		1-3	0	0	0	0		0	0	NA	NA
AGCCAATATCGGACGATGAAGC	23H-RNA	other		0	2	4	0	0		1-3	0	0	0	0		0	0	NA	NA
ATCCCAGAACTGGAAATCTTCAC	23H-RNA	other		0	2	18	0	0		1-3	0	0	0	0		0	0	NA	NA
ATGGATAGCTCAGTGGATAGT	23H-RNA	irld-17, Y46H3D.4		0	2	6	0	0		1-3	6	2	0	0		0.5	0.3536	NA	NA
CAAAAATCGCCCGAAAATTCAC	23H-RNA	pde-2, R08D7.6		0	2	4	0	0		1-3	0	0	0	0		0	0	NA	NA
CAAAACTGCTGTTTCCCCTGTG	23H-RNA	Y59H11AR.6		0	2	14	0	0		1-3	0	1	0	0		0.0333	0.0471	NA	NA
CAAAATTTCCGCCCCATGCTTAC	23H-RNA	Y37E3.30		0	2	8	0	0		1-3	0	0	0	0		0	0	NA	NA
CAACCCTGAACCAGACGTACCA	23H-RNA	F31C3.11, rrn-2.1		0	2	3	0	0		1-3	0	0	0	0		0	0	NA	NA
CACTTACCAGCACACAGAGACGC	23H-RNA	Y57G11C.51		0	2	5	0	0		1-3	0	0	0	0		0	0	NA	NA
CATATCCCATGAATTGTCCGCA	23H-RNA	linc-17, Y49F6A.9		0	2	4	0	0		1-3	0	0	0	0		0	0	NA	NA
CATCAGCACCAACACCTCACCC	23H-RNA	C36A4.14		0	2	7	0	0		1-3	0	0	0	0		0	0	NA	NA
CCAGATCCGGAAAACGTAGATCC	23H-RNA	other		0	2	7	0	0		1-3	0	0	0	0		0	0	NA	NA
CCCCGAACGCAGATTTATTTTT	23H-RNA	T04D3.t1		0	2	5	0	0		1-3	0	0	0	0		0	0	NA	NA
CCGATGTTTCTGAGATGTCTT	23H-RNA	F43E2.6		0	2	13	0	4		1-3	2	0	0	0		0.25	0.3536	NA	NA
CCTCGAGAGCGCGACAAAAACT	23H-RNA	W03D2.15		0	2	10	0	0		1-3	0	0	0	0		0	0	NA	NA
CGCGTAGGTCTAAATTATTTTG	23H-RNA	other		0	2	5	0	0		1-3	0	0	0	0		0	0	NA	NA
CGGCCCTTACCGTTTAATACATGT	23H-RNA	mir-5592		0	2	10	0	0		1-3	0	0	0	0		0	0	NA	NA
CGGCGGCCGACGATTTCTGAGTT	23H-RNA	F23D12.11		0	2	2	0	0		1-3	0	0	0	0		0	0	NA	NA
CGTCCTGCTGTCAATATCAACCA	23H-RNA	F31C3.9, rrn-3.1		0	2	5	0	0		1-3	1	0	0	0		0.1667	0.2357	NA	NA
CGTCGCGGCCGAGCTTCCCAAA	23H-RNA	Y71H2B.5		0	2	2	0	0		1-3	0	0	0	0		0	0	NA	NA
CTCCAGGTCCATCTACAAACAAC	23H-RNA	K02E2.11		0	2	3	0	0		1-3	0	0	0	0		0	0	NA	NA
CTCGACTTTCCAGTTCTACCAT	23H-RNA	T05E12.10		0	2	2	0	0		1-3	2	0	0	0		0.25	0.3536	NA	NA
CTCTTCGAGCGCGTCTTCTTTA	23H-RNA	ChrIII_hairpin1		0	2	2	0	0		1-3	2	7	0	1		0.6389	0.1964	NA	NA
CTGCCTGCCCAGAGCTAAGTACC	23H-RNA	T25G12.8		0	2	7	0	0		1-3	0	0	0	0		0	0	NA	NA
CTTTTTTCGTTCTATGTGAGT	23H-RNA	F52D2.6		0	2	2	0	0		1-3	0	0	0	0		0	0	NA	NA
GAGTCGATGAAAGTGGTGGTAT	23H-RNA	F31C3.9, rrn-3.1		0	2	5	0	0		1-3	0	0	0	0		0	0	NA	NA
GCCGATGTTTCTGAGATGTCTTCA	23H-RNA	F43E2.6		0	2	5	0	0		1-3	0	0	0	0		0	0	NA	NA
GCGGAGATTCACTGGAGATTTG	23H-RNA	lin-5, T09A5.10		0	2	3	0	0		1-3	0	0	0	0		0	0	NA	NA
GGACCACCGAGACGCATGATA	23H-RNA	Y37E3.30		0	2	12	0	0		1-3	0	0	0	0		0	0	NA	NA
GGAGGGATGCGAAATAAATATTTT	23H-RNA	Y57G11C.36, Y57G11C.51		0	2	5	0	0		1-3	0	0	0	0		0	0	NA	NA
TATGTTTAACTCGCAGCGGGCA	23H-RNA	other		0	2	2	0	0		1-3	4	10	2	0		0.75	0.1179	NA	NA
TCATCAGCTCCATCAACACCACCA	23H-RNA	C36A4.14		0	2	2	0	0		1-3	1	0	0	0		0.1667	0.2357	NA	NA
TCATCTAAGGCTAAATATCGA	23H-RNA	F31C3.9, rrn-3.1		0	2	11	0	0		1-3	0	0	0	0		0	0	NA	NA
TCCATTGTATTTTCTCAGGACC	23H-RNA	F39E9.28		0	2	3	0	0		1-3	0	0	0	0		0	0	NA	NA
TCCGTCAGTCTTTTGTGAACAA	23H-RNA	dnj-12, F39B2.10		0	2	4	0	0		1-3	1	0	0	0		0.1667	0.2357	NA	NA
TCTACAGAAGGGACGCCGGAAA	23H-RNA	other		0	2	9	0	0		1-3	0	0	0	0		0	0	NA	NA
TCTGTACGTCCATTTGGCAATA	23H-RNA	Y105C5A.14		0	2	14	0	0		1-3	0	0	0	0		0	0	NA	NA
TGGCGTGTACTGCAGAAAACCC	23H-RNA	Y105C5A.15		0	2	9	0	0		1-3	17	12	0	0		0.7331	0.2286	NA	NA
TGTGTTCGTCCTCCATACATTG	23H-RNA	C36A4.14		0	2	11	0	0		1-3	0	0	0	0		0	0	NA	NA
TTCCCTTTATGTCGCACTTGCG	23H-RNA	T05E12.10		0	2	8	0	0		1-3	0	0	0	0		0	0	NA	NA
TTGATTGTGTCGGAAAAAGAAA	23H-RNA	K02E2.6		0	2	5	0	0		1-3	0	0	0	0		0	0	NA	NA
TTTCAACACGGCGGGAGGAAAGC	23H-RNA	Y37E3.30		0	2	7	0	0		1-3	0	1	0	0		0.0625	0.0884	NA	NA
TTTCGTCCATACATTGAGGGAGC	23H-RNA	F39E9.10		0	2	6	0	0		1-3	0	0	0	0		0	0	NA	NA
GGGCATCGAGCTGAAAGAGAGAGC	23H-RNA	F55A4.9, rncs-1		0	1	39	0	0		1-3	0	17	0	0		0.1518	0.2147	NA	NA
GTGGAGCTGGACGATGGATTCTTT	23H-RNA	F55A4.9, rncs-1		0	0	62	0	0		1-3	0	2	0	0		NA	NA	NA	NA
MIMAT0000006	miRNA	miR-35-3p		0	1013249	954732	331977	340755		1-3	22439	22013	7056	6874		0.0221	0.0006	0.0203	0.0007
MIMAT0000043	miRNA	miR-71-5p		0	842686	1397417	312944	301894		1-3	26023	44584	12677	8615		0.0304	0.0007	0.0333	0.0079
MIMAT0000053	miRNA	miR-80-3p		0	638577	1058681	436218	456530		1-3	24803	40074	48058	15235		0.0369	0.0006	0.0658	0.0473
MIMAT0000022	miRNA	miR-51-5p		0	627184	593446	24586	33270		1-3	6087	6695	279	307		0.0104	0.0011	0.0102	0.0015
MIMAT0000028	miRNA	miR-56-3p		0	546427	448912	235314	185875		1-3	4701	3992	2903	1523		0.0087	0.0002	0.0102	0.0029
MIMAT0000030	miRNA	miR-58a-3p		0	427293	387025	261602	203364		1-3	9593	8909	11035	4091		0.0222	0.0004	0.0301	0.0147
MIMAT0000019	miRNA	miR-48-5p		0	409689	572272	274068	295327		1-3	8564	12121	20313	5552		0.0206	0.0002	0.0437	0.0357
MIMAT0000010	miRNA	miR-39-3p		0	394796	361894	204221	181300		1-3	6135	5804	2922	2578		0.0155	0.0003	0.0141	0.0001
MIMAT0000026	miRNA	miR-55-3p		0	391720	431236	312464	237072		1-3	4843	5437	4121	2769		0.0123	0.0002	0.0123	0.001
MIMAT0000293	miRNA	miR-238-3p		0	321108	587569	25141	40934		1-3	3740	6956	1283	488		0.0116	0.0001	0.0302	0.026
MIMAT0000003	miRNA	miR-1-3p		0	288928	226832	189773	215889		1-3	9047	7008	10110	6009		0.0302	0.0003	0.0388	0.0166
MIMAT0000008	miRNA	miR-37-3p		0	283920	252830	122302	103778		1-3	6011	5638	2525	2025		0.0213	0.0008	0.0197	0.0008
MIMAT0000037	miRNA	miR-65-5p		0	254299	258335	128516	100394		1-3	8197	8833	9493	3065		0.0321	0.0013	0.0492	0.0277
MIMAT0000054	miRNA	miR-81-3p		0	248152	257608	113948	124292		1-3	6570	6924	2805	2945		0.026	0.0003	0.0236	0.0006
MIMAT0000055	miRNA	miR-82-3p		0	245815	242371	112494	120518		1-3	6482	6357	2820	2882		0.0256	0.0001	0.0239	0.0008
MIMAT0000011	miRNA	miR-40-3p		0	239516	197875	90317	74368		1-3	5458	4636	4581	1498		0.0226	0.0004	0.034	0.0202
MIMAT0000015	miRNA	miR-44-3p		0	196354	158153	77611	79078		1-3	5531	4514	1978	2022		0.0276	0.0002	0.0249	0.0001
MIMAT0000016	miRNA	miR-45-3p		0	196354	158153	77611	79078		1-3	5531	4514	1978	2022		0.0276	0.0002	0.0249	0.0001
MIMAT0000044	miRNA	miR-72-5p		0	184456	245560	152112	118951		1-3	4281	5750	10355	2494		0.0228	0.0001	0.0421	0.0305
MIMAT0000049	miRNA	miR-77-3p		0	180069	132370	83150	90052		1-3	2955	2185	6102	1288		0.0162	0.0001	0.0412	0.0384
MIMAT0000042	miRNA	miR-70-3p		0	170289	210428	108548	121359		1-3	1854	2374	1832	1152		0.011	0.0003	0.013	0.0051
MIMAT0000036	miRNA	miR-64-5p		0	163517	182494	107644	74153		1-3	4951	5648	7549	2041		0.0297	0.0004	0.0462	0.0274
MIMAT0015116	miRNA	miR-240-5p		0	138327	397881	1411	1582		1-3	3341	9748	44	43		0.0237	0.0002	0.0284	0.0027
MIMAT0000007	miRNA	miR-36-3p		0	102205	88057	51937	43475		1-3	2477	2116	1616	984		0.0236	0.0001	0.0262	0.0057
MIMAT0000290	miRNA	miR-235-3p		0	98221	69791	6188	18816		1-3	1213	938	486	191		0.0127	0.0008	0.0414	0.0444
MIMAT0000002	miRNA	lin-4-5p		0	96207	71889	44238	29374		1-3	1563	1265	1410	393		0.0166	0.0009	0.022	0.0125
MIMAT0000001	miRNA	let-7-5p		0	78781	92044	33435	34172		1-3	1288	1525	443	526		0.0162	0.0001	0.0141	0.0015
MIMAT0000033	miRNA	miR-61-3p		0	75348	61256	26704	29752		1-3	1286	1039	370	497		0.0167	0.0001	0.015	0.002
MIMAT0000061	miRNA	miR-90-3p		0	71316	63092	46022	38790		1-3	887	798	603	451		0.0124	0.0001	0.0122	0.001
MIMAT0000038	miRNA	miR-66-5p		0	62439	123806	101453	85925		1-3	1728	3407	8740	2150		0.0269	0.0001	0.0519	0.0388
MIMAT0000045	miRNA	miR-73-3p		0	59412	108461	49038	51809		1-3	1259	2285	985	1004		0.0207	0.0001	0.0194	0.0005
MIMAT0032017	miRNA	miR-789-2-5p		0	57766	169283	442	601		1-3	1433	4503	18	11		0.0251	0.0012	0.0286	0.015
MIMAT0000018	miRNA	miR-47-3p		0	51767	40166	34014	35744		1-3	719	529	3321	426		0.0133	0.0005	0.0504	0.0546
MIMAT0000283	miRNA	miR-228-5p		0	48851	67792	36095	33438		1-3	1225	1763	906	724		0.0249	0.0006	0.0228	0.0023
MIMAT0000292	miRNA	miR-237-5p		0	44224	66518	12942	11833		1-3	862	1416	228	189		0.02	0.0012	0.0165	0.0011
MIMAT0000017	miRNA	miR-46-3p		0	32446	27251	23483	20871		1-3	491	418	2539	264		0.015	0.0001	0.055	0.0602
MIMAT0000023	miRNA	miR-52-5p		0	32068	46138	24976	18880		1-3	341	594	255	196		0.0116	0.0015	0.0102	0.0001
MIMAT0000297	miRNA	miR-241-5p		0	26668	21123	6209	7629		1-3	670	588	487	180		0.0258	0.0018	0.0479	0.0351
MIMAT0000299	miRNA	miR-243-3p		0	26302	88679	519	622		1-3	277	1156	8	2		0.0116	0.0017	0.0092	0.0085
MIMAT0015110	miRNA	miR-84-3p		0	25069	42778	106	270		1-3	583	909	6	5		0.0218	0.0014	0.0359	0.025
MIMAT0000009	miRNA	miR-38-3p		0	22589	16479	9389	6686		1-3	746	550	326	186		0.0321	0.0002	0.0303	0.0046
MIMAT0000034	miRNA	miR-62		0	19617	28507	2132	2209		1-3	291	458	28	25		0.0152	0.0008	0.0121	0.0013
MIMAT0000302	miRNA	miR-246-3p		0	18567	17918	11085	10780		1-3	206	179	138	126		0.0104	0.0008	0.0119	0.0005
MIMAT0000021	miRNA	miR-50-5p		0	18458	29589	18030	15389		1-3	165	279	128	128		0.0091	0.0003	0.0076	0.0008
MIMAT0000057	miRNA	miR-84-5p		0	16718	47408	27694	22111		1-3	343	957	1417	396		0.0199	0.0002	0.0331	0.022
MIMAT0004228	miRNA	miR-793		0	15616	29065	1307	1642		1-3	392	751	115	36		0.0248	0.0005	0.0512	0.042
MIMAT0000308	miRNA	miR-252-5p		0	12386	15674	5139	4360		1-3	301	341	295	80		0.0225	0.0017	0.0362	0.0256
MIMAT0004221	miRNA	miR-786-3p		0	10614	9693	5189	4519		1-3	244	227	205	90		0.0227	0.0003	0.0288	0.0131
MIMAT0022306	miRNA	miR-5592-3p		0	9523	16853	103	129		1-3	162	311	1	0		0.0174	0.001	0.0048	0.0068
MIMAT0022306_1	miRNA	miR-5592-3p		0	9523	16853	103	129		1-3	162	311	1	0		0.0174	0.001	0.0048	0.0068
MIMAT0000013	miRNA	miR-42-3p		0	9490	7713	4687	3893		1-3	203	164	218	85		0.0209	0.0001	0.0329	0.0163
MIMAT0000029	miRNA	miR-57-5p		0	9083	42356	21371	19442		1-3	92	520	227	237		0.0111	0.0015	0.0113	0.0011
MIMAT0000291	miRNA	miR-236-3p		0	8972	6505	2992	2225		1-3	200	142	55	29		0.0216	0.0003	0.0155	0.0037
MIMAT0000035	miRNA	miR-63-3p		0	8581	17677	10019	7134		1-3	279	695	858	231		0.0347	0.0045	0.0551	0.0336
MIMAT0000051	miRNA	miR-79-3p		0	8393	8692	1619	1104		1-3	212	213	36	28		0.0243	0.0005	0.0232	0.0021
MIMAT0000020	miRNA	miR-49-3p		0	8236	6196	3864	2712		1-3	255	216	300	80		0.0319	0.0026	0.0503	0.0307
MIMAT0000058	miRNA	miR-85-3p		0	7989	28210	4461	3634		1-3	209	927	117	99		0.0287	0.0045	0.026	0.0007
MIMAT0000059	miRNA	miR-86-5p		0	7395	8010	3494	4072		1-3	131	165	75	57		0.0188	0.002	0.0174	0.0051
MIMAT0020777	miRNA	miR-232-5p		0	6988	14603	41	42		1-3	75	151	0	0		0.0104	0.0003	0	0
MIMAT0000031	miRNA	miR-59-3p		0	6397	10464	8017	8257		1-3	107	209	160	151		0.018	0.0022	0.0188	0.0011
MIMAT0000032	miRNA	miR-60-3p		0	6250	5258	4113	3662		1-3	119	134	419	79		0.0218	0.0044	0.0568	0.0504
MIMAT0000025	miRNA	miR-54-3p		0	5961	7611	5589	3948		1-3	85	128	109	47		0.0153	0.0018	0.0154	0.0052
MIMAT0000301	miRNA	miR-245-3p		0	5771	4772	3051	2188		1-3	54	39	28	22		0.0087	0.0008	0.0095	0.0006
MIMAT0004225	miRNA	miR-790-5p		0	4119	5787	991	922		1-3	30	74	15	15		0.0099	0.0038	0.0155	0.0008
MIMAT0000306	miRNA	miR-250-3p		0	4005	1979	2377	1776		1-3	119	62	247	41		0.0296	0.0011	0.0583	0.0506
MIMAT0000284	miRNA	miR-229-5p		0	3907	8919	3280	1380		1-3	51	164	74	31		0.0155	0.0037	0.022	0.0001
MIMAT0015114	miRNA	miR-238-5p		0	3563	18457	486	372		1-3	54	372	11	11		0.0173	0.0034	0.0254	0.0047
MIMAT0004215	miRNA	miR-253-3p		0	3119	2700	1438	1829		1-3	49	34	48	24		0.014	0.0021	0.0226	0.0137
MIMAT0000701	miRNA	miR-359		0	2766	2648	1100	1401		1-3	25	37	58	25		0.0114	0.0034	0.0338	0.023
MIMAT0000048	miRNA	miR-76-3p		0	2719	2960	1903	1999		1-3	48	49	130	29		0.0168	0.0008	0.0391	0.0351
MIMAT0000697	miRNA	miR-355-5p		0	2661	2262	1170	1212		1-3	26	30	12	10		0.0114	0.0024	0.0092	0.0014
MIMAT0000289	miRNA	miR-234-3p		0	2507	1871	1078	862		1-3	34	25	12	3		0.0133	0.0001	0.0072	0.0053
MIMAT0000304	miRNA	miR-248		0	2288	3451	1212	1499		1-3	70	83	142	30		0.0266	0.0044	0.0622	0.0603
MIMAT0000296	miRNA	miR-240-3p		0	2270	1542	691	620		1-3	27	13	10	4		0.0101	0.0024	0.0103	0.0056
MIMAT0000288	miRNA	miR-233-3p		0	2260	2550	665	443		1-3	44	57	38	6		0.0205	0.002	0.0337	0.0288
MIMAT0000012	miRNA	miR-41-3p		0	2171	1496	896	683		1-3	68	53	54	19		0.0323	0.0027	0.042	0.0211
MIMAT0004222	miRNA	miR-787-3p		0	2169	2800	1394	1434		1-3	13	32	11	13		0.0086	0.0038	0.0084	0.0008
MIMAT0000004	miRNA	miR-2-3p		0	2067	2052	1067	819		1-3	34	28	14	22		0.0148	0.0019	0.0196	0.0093
MIMAT0015107	miRNA	miR-71-3p		0	1766	1401	2517	3037		1-3	25	7	20	32		0.0095	0.0064	0.0092	0.0018
MIMAT0000056	miRNA	miR-83-3p		0	1701	1109	687	484		1-3	31	29	25	9		0.0217	0.0054	0.0267	0.0119
MIMAT0000005	miRNA	miR-34-5p		0	1602	1378	2630	2068		1-3	22	18	25	24		0.0132	0.0005	0.0104	0.0015
MIMAT0015100	miRNA	miR-58a-5p		0	1536	1351	1405	1575		1-3	14	4	6	11		0.006	0.0043	0.0056	0.0019
MIMAT0000052	miRNA	miR-80-5p		0	1535	1146	1703	1811		1-3	24	29	82	51		0.02	0.0066	0.0367	0.0131
MIMAT0004224	miRNA	miR-789-3p		0	1522	1880	15	13		1-3	20	15	0	0		0.0104	0.0036	0	0
MIMAT0004224_1	miRNA	miR-789-3p		0	1522	1880	15	13		1-3	20	15	0	0		0.0104	0.0036	0	0
MIMAT0004220	miRNA	miR-785-3p		0	1500	1886	945	1125		1-3	25	38	47	23		0.0181	0.0024	0.0337	0.0193
MIMAT0020770	miRNA	miR-41-5p		0	1468	7619	12105	16433		1-3	8	87	341	157		0.0084	0.0042	0.0184	0.0127
MIMAT0000024	miRNA	miR-53-5p		0	1367	2591	1195	838		1-3	12	17	9	5		0.0076	0.0015	0.0067	0.0011
MIMAT0015103	miRNA	miR-61-5p		0	1297	1202	951	847		1-3	2	7	3	6		0.0037	0.003	0.0051	0.0028
MIMAT0032016	miRNA	miR-789-5p		0	1199	2714	75	66		1-3	214	735	4	1		0.1823	0.0436	0.0328	0.0252
MIMAT0020003	miRNA	miR-4814-3p		0	1170	2917	14	16		1-3	21	84	0	1		0.0228	0.0073	0.0294	0.0416
MIMAT0000700	miRNA	miR-358-3p		0	1081	1328	24	15		1-3	21	21	1	0		0.0173	0.0025	0.02	0.0283
MIMAT0000046	miRNA	miR-74-3p		0	1072	643	498	348		1-3	26	18	50	5		0.0255	0.0025	0.0527	0.0545
MIMAT0000298	miRNA	miR-242		0	1057	895	703	661		1-3	5	13	77	4		0.0095	0.0068	0.0524	0.0656
MIMAT0020335	miRNA	miR-241-3p		0	990	994	198	460		1-3	11	14	1	3		0.0124	0.0021	0.0058	0.001
MIMAT0000060	miRNA	miR-87-3p		0	976	1070	861	983		1-3	14	21	18	18		0.0167	0.0036	0.0192	0.0018
MIMAT0000285	miRNA	miR-230-3p		0	951	1750	970	1230		1-3	18	37	75	35		0.0196	0.0015	0.0497	0.0312
MIMAT0020326	miRNA	miR-90-5p		0	950	989	1063	1165		1-3	15	21	32	20		0.0182	0.0037	0.0231	0.0087
MIMAT0020778	miRNA	miR-1830-3p		0	946	1692	84	72		1-3	26	59	1	4		0.0302	0.0049	0.0322	0.0289
MIMAT0015096	miRNA	miR-46-5p		0	873	887	467	411		1-3	18	19	16	12		0.0206	0.0005	0.0307	0.0034
MIMAT0000294	miRNA	miR-239a-5p		0	852	817	375	251		1-3	6	27	18	4		0.0195	0.0177	0.0307	0.0213
MIMAT0000050	miRNA	miR-78		0	793	934	1862	1638		1-3	3	5	12	5		0.0045	0.0011	0.0047	0.0024
MIMAT0020774	miRNA	miR-77-5p		0	777	1009	4839	5845		1-3	14	15	121	103		0.0162	0.0022	0.0209	0.005
MIMAT0022312	miRNA	miR-356b-3p		0	769	843	363	481		1-3	8	7	35	7		0.0093	0.0015	0.0511	0.052
MIMAT0015112	miRNA	miR-229-3p		0	713	1290	1376	1545		1-3	16	22	38	32		0.0194	0.0037	0.0236	0.0047
MIMAT0015104	miRNA	miR-63-5p		0	638	879	390	506		1-3	9	7	2	3		0.0109	0.0042	0.0055	0.0006
MIMAT0015240	miRNA	miR-788-3p		0	609	615	422	271		1-3	18	16	37	9		0.027	0.0024	0.0564	0.0343
MIMAT0004230	miRNA	miR-795-5p		0	600	2028	885	586		1-3	13	56	16	14		0.024	0.004	0.0205	0.0039
MIMAT0020339	miRNA	miR-250-5p		0	538	541	1499	1727		1-3	2	5	12	11		0.0064	0.0039	0.0071	0.0011
MIMAT0020354	miRNA	miR-800-5p		0	536	851	2	2		1-3	14	25	0	0		0.027	0.0022	0	0
MIMAT0020773	miRNA	miR-54-5p		0	535	410	854	907		1-3	11	24	120	36		0.0377	0.0249	0.0807	0.0601
MIMAT0004226	miRNA	miR-791-3p		0	517	721	106	80		1-3	12	14	11	4		0.0209	0.0026	0.0708	0.0328
MIMAT0015097	miRNA	miR-47-5p		0	490	369	291	246		1-3	7	12	5	14		0.0228	0.0123	0.0354	0.0261
MIMAT0015120	miRNA	miR-358-5p		0	477	591	39	26		1-3	7	10	1	1		0.0156	0.0015	0.031	0.0085
MIMAT0006587	miRNA	miR-1820-5p		0	412	5028	962	535		1-3	3	36	7	8		0.0072	0.0001	0.011	0.0053
MIMAT0000300	miRNA	miR-244-5p		0	378	1274	721	515		1-3	5	17	8	14		0.0131	0.0001	0.0187	0.011
MIMAT0020323	miRNA	miR-82-5p		0	373	683	270	324		1-3	1	2	13	3		0.0028	0.0002	0.0276	0.026
MIMAT0006769	miRNA	miR-1829a-3p		0	369	293	164	166		1-3	5	12	5	5		0.0264	0.0184	0.0294	0.0002
MIMAT0006589	miRNA	miR-1822-3p		0	343	235	225	116		1-3	4	2	5	0		0.01	0.0022	0.0109	0.0154
MIMAT0000039	miRNA	miR-67-3p		0	320	483	159	87		1-3	4	14	7	1		0.0203	0.0112	0.0268	0.0218
MIMAT0015113	miRNA	miR-230-5p		0	315	670	91	127		1-3	3	6	3	0		0.0092	0.0004	0.016	0.0226
MIMAT0020771	miRNA	miR-44-5p		0	308	395	999	1379		1-3	3	6	31	13		0.0123	0.0038	0.0197	0.0147
MIMAT0011436	miRNA	miR-2210-3p		0	293	340	144	124		1-3	2	5	5	2		0.0106	0.0055	0.0247	0.0125
MIMAT0004216	miRNA	miR-255-3p		0	292	287	124	98		1-3	15	6	2	4		0.0347	0.0201	0.0275	0.0165
MIMAT0004219	miRNA	miR-784-5p		0	278	230	99	122		1-3	4	11	4	5		0.0299	0.0222	0.0391	0.0004
MIMAT0020001	miRNA	miR-4813-3p		0	276	377	98	60		1-3	1	2	0	1		0.0044	0.0012	0.0082	0.0116
MIMAT0005523	miRNA	miR-1022-5p		0	274	513	248	264		1-3	7	11	3	7		0.023	0.0028	0.0189	0.0098
MIMAT0006584	miRNA	miR-1817		0	269	416	257	194		1-3	13	9	5	0		0.0336	0.0176	0.0095	0.0135
MIMAT0006586	miRNA	miR-1819-3p		0	268	555	96	99		1-3	8	23	6	3		0.0344	0.0076	0.0441	0.0208
MIMAT0000047	miRNA	miR-75-3p		0	263	165	87	52		1-3	6	8	10	4		0.0343	0.0169	0.0873	0.0224
MIMAT0015108	miRNA	miR-75-5p		0	262	217	139	150		1-3	3	0	7	1		0.0057	0.008	0.0273	0.0292
MIMAT0015267	miRNA	miR-1829a-5p		0	255	351	156	197		1-3	15	8	11	6		0.0389	0.0235	0.0477	0.0257
MIMAT0004234	miRNA	miR-799		0	250	183	168	116		1-3	5	4	4	2		0.0205	0.0013	0.0201	0.0045
MIMAT0000699	miRNA	miR-357-3p		0	249	229	143	120		1-3	8	2	3	2		0.0199	0.0159	0.0185	0.0029
MIMAT0015098	miRNA	miR-48-3p		0	229	136	39	78		1-3	5	4	5	0		0.025	0.0051	0.0568	0.0804
MIMAT0015117	miRNA	miR-243-5p		0	225	420	11	20		1-3	5	9	0	0		0.0214	0.0005	0	0
MIMAT0020306	miRNA	miR-39-5p		0	217	198	1270	1588		1-3	2	2	46	20		0.0096	0.0006	0.0237	0.0159
MIMAT0020776	miRNA	miR-86-3p		0	215	228	249	278		1-3	0	1	0	0		0.0022	0.0031	0	0
MIMAT0032037	miRNA	miR-1829b-3p		0	193	122	387	363		1-3	5	1	5	5		0.0167	0.0121	0.0132	0.0006
MIMAT0032038	miRNA	miR-1829c-3p		0	193	122	386	363		1-3	5	1	5	5		0.0167	0.0121	0.0132	0.0006
MIMAT0020333	miRNA	miR-237-3p		0	183	348	38	30		1-3	2	4	2	1		0.0111	0.0004	0.0411	0.0125
MIMAT0006771	miRNA	miR-1829c-5p		0	181	266	122	127		1-3	4	6	11	1		0.0218	0.0003	0.0453	0.053
MIMAT0000282	miRNA	miR-124-3p		0	180	144	77	39		1-3	1	2	6	1		0.0096	0.0058	0.0486	0.0334
MIMAT0000314	miRNA	miR-259-5p		0	176	250	167	197		1-3	4	8	28	4		0.0266	0.0062	0.0817	0.0875
MIMAT0020307	miRNA	miR-40-5p		0	175	208	1488	1499		1-3	6	11	63	47		0.0417	0.0121	0.0355	0.0072
MIMAT0011450	miRNA	miR-1832b-3p		0	173	537	4	2		1-3	7	11	0	0		0.0295	0.0133	0	0
MIMAT0020772	miRNA	miR-45-5p		0	171	222	778	995		1-3	308	393	1048	1396		0.641	0.0028	0.5789	0.007
MIMAT0020350	miRNA	miR-791-5p		0	166	281	25	37		1-3	0	4	1	0		0.007	0.0099	0.0192	0.0272
MIMAT0020334	miRNA	miR-239a-3p		0	161	157	391	407		1-3	7	11	53	14		0.0536	0.0168	0.0763	0.0609
MIMAT0022193	miRNA	miR-5551-5p		0	151	161	69	73		1-3	7	4	3	1		0.0343	0.0142	0.0276	0.0199
MIMAT0020330	miRNA	miR-234-5p		0	148	216	2	6		1-3	5	5	0	0		0.0277	0.0071	0	0
MIMAT0020349	miRNA	miR-790-3p		0	145	309	107	101		1-3	0	1	1	1		0.0016	0.0023	0.0095	0.0004
MIMAT0022198	miRNA	miR-5553-3p		0	137	282	7	5		1-3	7	10	1	0		0.0414	0.0102	0.0625	0.0884
MIMAT0020309	miRNA	miR-49-5p		0	132	222	167	215		1-3	0	2	3	2		0.0045	0.0063	0.0134	0.006
MIMAT0000305	miRNA	miR-249-3p		0	129	212	48	66		1-3	1	2	1	1		0.0085	0.0012	0.0177	0.0039
MIMAT0015109	miRNA	miR-81-5p		0	129	164	464	396		1-3	0	1	39	7		0.003	0.0043	0.0475	0.0425
MIMAT0020361	miRNA	miR-58b-5p		0	125	95	186	228		1-3	3	0	4	3		0.0117	0.0166	0.017	0.0057
MIMAT0006770	miRNA	miR-1829b-5p		0	124	148	143	67		1-3	3	4	8	9		0.025	0.0019	0.0857	0.0463
MIMAT0020301	miRNA	miR-1-5p		0	121	121	31	72		1-3	4	2	2	2		0.0241	0.0111	0.0438	0.0237
MIMAT0000286	miRNA	miR-231-3p		0	120	300	162	87		1-3	1	9	16	2		0.0187	0.0148	0.0562	0.0477
MIMAT0020317	miRNA	miR-70-5p		0	114	113	156	101		1-3	5	2	14	2		0.0297	0.0174	0.0509	0.0445
MIMAT0011432	miRNA	miR-2209a-3p		0	113	75	8	36		1-3	2	6	0	1		0.0457	0.0401	0.0135	0.0191
MIMAT0011449	miRNA	miR-1832b-5p		0	113	128	0	3		1-3	0	4	0	0		0.0152	0.0214	NA	NA
MIMAT0006588	miRNA	miR-1821-3p		0	110	131	73	93		1-3	4	1	3	0		0.0213	0.0195	0.0197	0.0279
MIMAT0020320	miRNA	miR-74-5p		0	110	156	687	821		1-3	2	0	6	6		0.0089	0.0126	0.008	0.001
MIMAT0000287	miRNA	miR-232-3p		0	109	139	113	63		1-3	3	6	7	0		0.0341	0.0103	0.0292	0.0412
MIMAT0005033	miRNA	miR-1020-3p		0	105	135	99	85		1-3	3	3	1	2		0.0248	0.0043	0.0165	0.0092
MIMAT0032829	miRNA	miR-8206-5p		0	100	138	3	2		1-3	0	5	0	0		0.0175	0.0247	0	0
MIMAT0022192	miRNA	miR-5550-3p		0	99	207	0	2		1-3	0	7	0	0		0.0164	0.0231	NA	NA
MIMAT0000749	miRNA	lsy-6-3p		0	98	76	44	44		1-3	6	1	7	1		0.0353	0.0316	0.0797	0.0813
MIMAT0022305	miRNA	miR-5592-5p		0	97	209	0	2		1-3	0	0	0	0		0	0	NA	NA
MIMAT0022305_1	miRNA	miR-5592-5p		0	97	209	0	2		1-3	0	0	0	0		0	0	NA	NA
MIMAT0020304	miRNA	miR-36-5p		0	95	73	192	236		1-3	3	0	14	2		0.0153	0.0216	0.0382	0.0421
MIMAT0020775	miRNA	miR-83-5p		0	94	195	551	642		1-3	5	7	44	16		0.0426	0.0112	0.0491	0.0351
MIMAT0011430	miRNA	miR-2208b-3p		0	93	56	14	33		1-3	5	0	0	1		0.0255	0.0361	0.0147	0.0208
MIMAT0000295	miRNA	miR-239b-5p		0	86	40	28	33		1-3	1	0	2	0		0.0057	0.0081	0.0333	0.0471
MIMAT0015121	miRNA	miR-360-5p		0	81	76	30	36		1-3	0	0	4	0		0	0	0.0588	0.0832
MIMAT0020318	miRNA	miR-72-3p		0	80	48	62	312		1-3	1	0	0	4		0.0062	0.0087	0.0063	0.009
MIMAT0022185	miRNA	miR-5547-5p		0	72	105	1	2		1-3	5	11	0	0		0.0799	0.0211	0	0
MIMAT0004235	miRNA	miR-800-3p		0	70	80	86	59		1-3	18	9	12	10		0.1528	0.0731	0.1337	0.0159
MIMAT0011439	miRNA	miR-2212-5p		0	69	134	80	60		1-3	2	2	5	0		0.0214	0.0095	0.0294	0.0416
MIMAT0020327	miRNA	miR-228-3p		0	67	20	140	151		1-3	4	5	3	2		0.1282	0.1016	0.017	0.0056
MIMAT0019990	miRNA	miR-4807		0	66	125	41	46		1-3	0	0	1	1		0	0	0.0225	0.0018
MIMAT0020352	miRNA	miR-794-3p		0	66	91	22	29		1-3	2	1	3	2		0.0201	0.0131	0.0923	0.0392
MIMAT0000303	miRNA	miR-247-3p		0	63	43	36	21		1-3	0	1	5	0		0.0114	0.0161	0.061	0.0862
MIMAT0020319	miRNA	miR-73-5p		0	62	130	507	686		1-3	0	4	4	9		0.0149	0.0211	0.0104	0.0036
MIMAT0020322	miRNA	miR-79-5p		0	62	71	95	94		1-3	0	0	7	0		0	0	0.0343	0.0485
MIMAT0032786	miRNA	miR-8186-3p		0	60	88	0	2		1-3	2	1	0	0		0.0217	0.0149	NA	NA
MIMAT0032786_1	miRNA	miR-8186-3p		0	60	88	0	2		1-3	2	1	0	0		0.0217	0.0149	NA	NA
MIMAT0020005	miRNA	miR-4816-5p		0	58	85	160	241		1-3	5	2	10	9		0.0512	0.0399	0.0474	0.0161
MIMAT0020316	miRNA	miR-67-5p		0	56	115	62	64		1-3	0	0	0	0		0	0	0	0
MIMAT0000014	miRNA	miR-43-3p		0	54	38	58	27		1-3	4	0	0	0		0.0345	0.0488	0	0
MIMAT0015099	miRNA	miR-51-3p		0	54	47	275	162		1-3	0	2	31	2		0.0204	0.0289	0.0568	0.063
MIMAT0032815	miRNA	miR-8201-5p		0	53	65	5	2		1-3	1	0	1	0		0.0093	0.0131	0.0833	0.1179
MIMAT0019998	miRNA	miR-4812-5p		0	51	68	34	27		1-3	0	0	2	0		0	0	0.0278	0.0393
MIMAT0032799	miRNA	miR-8193-5p		0	50	199	6	9		1-3	0	10	0	0		0.0239	0.0338	0	0
MIMAT0020006	miRNA	miR-4816-3p		0	48	68	38	15		1-3	1	1	2	0		0.0175	0.0042	0.025	0.0354
MIMAT0006774	miRNA	miR-1832a-3p		0	44	65	57	56		1-3	1	2	0	3		0.026	0.0054	0.0254	0.036
MIMAT0032817	miRNA	miR-8202-5p		0	44	35	110	112		1-3	0	1	5	3		0.0139	0.0196	0.0348	0.0123
MIMAT0004229	miRNA	miR-794-5p		0	43	44	37	43		1-3	0	3	0	0		0.0319	0.0451	0	0
MIMAT0006591	miRNA	miR-1824-5p		0	42	30	23	12		1-3	0	0	0	0		0	0	0	0
MIMAT0020342	miRNA	miR-259-3p		0	42	81	83	38		1-3	1	3	1	0		0.0295	0.0088	0.006	0.0084
MIMAT0032823	miRNA	miR-8204-5p		0	42	57	0	1		1-3	2	0	0	0		0.0227	0.0321	NA	NA
MIMAT0006772	miRNA	miR-1830-5p		0	41	33	7	8		1-3	0	0	0	0		0	0	0	0
MIMAT0020337	miRNA	miR-246-5p		0	41	52	90	135		1-3	0	1	0	1		0.0094	0.0133	0.0037	0.0052
MIMAT0011462	miRNA	miR-2220-3p		0	40	15	5	17		1-3	0	0	0	0		0	0	0	0
MIMAT0006775	miRNA	miR-1833		0	37	110	0	0		1-3	37	108	0	0		0.4977	0.0032	NA	NA
MIMAT0004227	miRNA	miR-792-3p		0	35	28	8	5		1-3	0	0	1	0		0	0	0.0556	0.0786
MIMAT0020328	miRNA	miR-231-5p		0	35	23	79	96		1-3	2	0	2	3		0.027	0.0382	0.0275	0.004
MIMAT0049030	miRNA	miR-58c		0	35	63	14	4		1-3	0	1	1	0		0.0078	0.011	0.0333	0.0471
MIMAT0000307	miRNA	miR-251		0	34	82	14	17		1-3	0	0	0	0		0	0	0	0
MIMAT0011425	miRNA	miR-2207-5p		0	34	70	0	1		1-3	2	1	0	0		0.0348	0.0293	NA	NA
MIMAT0004231	miRNA	miR-796		0	32	80	46	39		1-3	2	0	1	1		0.0294	0.0416	0.0231	0.0026
MIMAT0011429	miRNA	miR-2208b-5p		0	30	45	14	8		1-3	0	0	0	0		0	0	0	0
MIMAT0020002	miRNA	miR-4814-5p		0	30	9	1	0		1-3	1	1	0	0		0.0661	0.0479	NA	NA
MIMAT0032822	miRNA	miR-4810b-3p		0	30	1	6	0		1-3	1	0	0	0		0.0161	0.0228	NA	NA
MIMAT0032785	miRNA	miR-8186-5p		0	29	53	0	1		1-3	1	15	0	0		0.127	0.1324	NA	NA
MIMAT0032785_1	miRNA	miR-8186-5p		0	29	53	0	1		1-3	1	15	0	0		0.127	0.1324	NA	NA
MIMAT0005031	miRNA	miR-1018		0	27	34	4	11		1-3	0	1	0	0		0.0143	0.0202	0	0
MIMAT0022195	miRNA	miR-5552-5p		0	27	64	2	1		1-3	2	9	0	1		0.0961	0.0384	0.25	0.3536
MIMAT0020302	miRNA	miR-2-5p		0	24	2	16	14		1-3	0	0	0	3		0	0	0.0882	0.1248
MIMAT0020311	miRNA	miR-52-3p		0	24	33	112	66		1-3	0	1	2	2		0.0147	0.0208	0.0235	0.0084
MIMAT0020353	miRNA	miR-795-3p		0	24	25	21	33		1-3	0	0	1	0		0	0	0.0227	0.0321
MIMAT0015092	miRNA	lin-4-3p		0	22	27	4	7		1-3	0	0	0	0		0	0	0	0
MIMAT0015102	miRNA	miR-60-5p		0	22	12	25	17		1-3	1	0	0	0		0.0217	0.0307	0	0
MIMAT0019997	miRNA	miR-4811-3p		0	21	17	6	8		1-3	1	0	0	0		0.0227	0.0321	0	0
MIMAT0011460	miRNA	miR-2219-3p		0	20	37	3	3		1-3	1	4	0	0		0.0726	0.0353	0	0
MIMAT0032039	miRNA	miR-1832a-5p		0	18	7	28	28		1-3	0	3	0	0		0.15	0.2121	0	0
MIMAT0004223	miRNA	miR-788-5p		0	17	25	2	0		1-3	1	0	0	0		0.0278	0.0393	NA	NA
MIMAT0020314	miRNA	miR-57-3p		0	17	8	68	54		1-3	1	1	14	3		0.0833	0.0393	0.1117	0.0835
MIMAT0000310	miRNA	miR-254-3p		0	16	23	14	13		1-3	0	0	1	0		0	0	0.0333	0.0471
MIMAT0020000	miRNA	miR-4813-5p		0	16	57	58	61		1-3	0	2	0	2		0.0169	0.024	0.0159	0.0224
MIMAT0020325	miRNA	miR-87-5p		0	16	26	142	124		1-3	0	0	0	0		0	0	0	0
MIMAT0020329	miRNA	miR-233-5p		0	16	31	8	18		1-3	0	0	0	0		0	0	0	0
MIMAT0015095	miRNA	miR-42-5p		0	15	87	321	257		1-3	0	1	15	1		0.0057	0.008	0.0243	0.0288
MIMAT0015111	miRNA	miR-124-5p		0	14	21	14	17		1-3	2	0	0	0		0.0625	0.0884	0	0
MIMAT0019992	miRNA	miR-4808-3p		0	14	22	16	5		1-3	0	0	0	1		0	0	0.0833	0.1179
MIMAT0020142	miRNA	miR-4936		0	14	9	57	64		1-3	0	0	3	0		0	0	0.025	0.0354
MIMAT0020313	miRNA	miR-55-5p		0	14	15	162	87		1-3	0	0	4	1		0	0	0.0177	0.009
MIMAT0015093	miRNA	miR-34-3p		0	13	7	74	33		1-3	0	0	1	0		0	0	0.0067	0.0094
MIMAT0020324	miRNA	miR-85-5p		0	13	31	1	4		1-3	0	0	0	0		0	0	0	0
MIMAT0022309	miRNA	miR-5594-5p		0	13	1	1	4		1-3	3	0	0	0		0.0938	0.1326	0	0
MIMAT0006590	miRNA	miR-1823-3p		0	12	9	6	1		1-3	0	0	0	0		0	0	0	0
MIMAT0011427	miRNA	miR-2208a-5p		0	12	10	6	5		1-3	31	45	14	8		0.7696	0.0688	0.6577	0.0598
MIMAT0015241	miRNA	miR-797-3p		0	12	20	10	11		1-3	0	3	0	0		0.0652	0.0922	0	0
MIMAT0020126	miRNA	miR-4920		0	12	5	8	11		1-3	0	0	2	0		0	0	0.1	0.1414
MIMAT0019999	miRNA	miR-4812-3p		0	11	7	5	4		1-3	0	0	0	0		0	0	0	0
MIMAT0022310	miRNA	miR-5594-3p		0	11	0	10	2		1-3	0	0	4	0		NA	NA	0.1429	0.202
MIMAT0006776	miRNA	miR-58b-3p		0	10	0	0	0		1-3	0	0	0	0		NA	NA	NA	NA
MIMAT0011463	miRNA	miR-2221		0	10	5	0	0		1-3	1	0	0	0		0.0455	0.0643	NA	NA
MIMAT0015094	miRNA	miR-37-5p		0	10	16	217	225		1-3	0	0	12	1		0	0	0.0284	0.0339
MIMAT0019994	miRNA	miR-4809-3p		0	10	12	3	8		1-3	0	0	2	0		0	0	0.2	0.2828
MIMAT0020131	miRNA	miR-4923b		0	10	5	3	12		1-3	0	0	0	0		0	0	0	0
MIMAT0032798	miRNA	miR-8192-3p		0	10	7	1	0		1-3	0	2	0	0		0.1111	0.1571	NA	NA
MIMAT0015091	miRNA	let-7-3p		0	9	19	1	2		1-3	0	0	0	0		0	0	0	0
MIMAT0022184	miRNA	miR-5546-3p		0	9	9	3	1		1-3	1	0	0	0		0.05	0.0707	0	0
MIMAT0032826	miRNA	miR-8196b-3p		0	9	37	19	26		1-3	0	1	0	0		0.0132	0.0186	0	0
MIMAT0015266	miRNA	miR-1822-5p		0	8	83	15	19		1-3	0	1	0	0		0.006	0.0084	0	0
MIMAT0020356	miRNA	miR-1020-5p		0	8	12	11	1		1-3	0	0	0	0		0	0	0	0
MIMAT0011452	miRNA	miR-2217a-3p		0	7	9	4	3		1-3	0	0	0	0		0	0	0	0
MIMAT0020310	miRNA	miR-50-3p		0	7	7	32	21		1-3	0	0	0	0		0	0	0	0
MIMAT0020332	miRNA	miR-236-5p		0	7	25	10	17		1-3	0	0	0	0		0	0	0	0
MIMAT0022182	miRNA	miR-5545-3p		0	7	12	0	1		1-3	0	0	0	0		0	0	NA	NA
MIMAT0011435	miRNA	miR-2210-5p		0	6	10	3	7		1-3	0	1	0	0		0.0455	0.0643	0	0
MIMAT0019988	miRNA	miR-4806-5p		0	6	8	13	8		1-3	0	0	0	0		0	0	0	0
MIMAT0032814	miRNA	miR-8200-3p		0	6	11	0	0		1-3	0	0	0	0		0	0	NA	NA
MIMAT0032833	miRNA	miR-8208-5p		0	6	12	1	7		1-3	0	0	0	0		0	0	0	0
MIMAT0011447	miRNA	miR-2216-5p		0	5	0	1	0		1-3	0	0	0	0		NA	NA	NA	NA
MIMAT0015101	miRNA	miR-59-5p		0	5	7	3	0		1-3	1	0	0	0		0.0833	0.1179	NA	NA
MIMAT0020312	miRNA	miR-53-3p		0	5	4	4	7		1-3	0	0	0	0		0	0	0	0
MIMAT0011434	miRNA	miR-2209c-3p		0	4	7	1	0		1-3	0	0	0	0		0	0	NA	NA
MIMAT0011437	miRNA	miR-2211-5p		0	4	0	0	0		1-3	0	0	0	0		NA	NA	NA	NA
MIMAT0022190	miRNA	miR-5549-3p		0	4	0	2	4		1-3	0	0	0	0		NA	NA	0	0
MIMAT0022191	miRNA	miR-5550-5p		0	4	0	0	0		1-3	0	0	0	0		NA	NA	NA	NA
MIMAT0022196	miRNA	miR-5552-3p		0	4	10	1	1		1-3	0	0	0	0		0	0	0	0
MIMAT0022307	miRNA	miR-5593-5p		0	4	0	1	0		1-3	0	0	0	0		NA	NA	NA	NA
MIMAT0022307_1	miRNA	miR-5593-5p		0	4	0	1	0		1-3	0	0	0	0		NA	NA	NA	NA
MIMAT0031891	miRNA	miR-254-5p		0	4	0	2	0		1-3	0	0	0	0		NA	NA	NA	NA
MIMAT0032797	miRNA	miR-8192-5p		0	4	26	0	0		1-3	0	0	0	0		0	0	NA	NA
MIMAT0032805	miRNA	miR-8196a-5p		0	4	0	0	0		1-3	0	0	0	0		NA	NA	NA	NA
MIMAT0032806	miRNA	miR-8196a-3p		0	4	7	3	5		1-3	0	0	0	0		0	0	0	0
MIMAT0032811	miRNA	miR-8199-5p		0	4	14	42	26		1-3	0	0	4	0		0	0	0.0435	0.0615
MIMAT0032842	miRNA	miR-8211-5p		0	4	0	3	0		1-3	0	1	0	0		0.5	0.7071	NA	NA
MIMAT0000309	miRNA	miR-253-5p		0	3	0	25	30		1-3	0	0	8	0		NA	NA	0.1212	0.1714
MIMAT0011459	miRNA	miR-2219-5p		0	3	11	0	0		1-3	0	0	0	0		0	0	NA	NA
MIMAT0020128	miRNA	miR-4922		0	3	6	1	1		1-3	0	0	0	0		0	0	0	0
MIMAT0020128_1	miRNA	miR-4922		0	3	6	1	1		1-3	0	0	0	0		0	0	0	0
MIMAT0020135	miRNA	miR-4929		0	3	2	0	2		1-3	0	0	0	0		0	0	NA	NA
MIMAT0020344	miRNA	miR-392-5p		0	3	7	4	3		1-3	0	0	0	0		0	0	0	0
MIMAT0020359	miRNA	miR-1820-3p		0	3	2	3	0		1-3	0	0	0	0		0	0	NA	NA
MIMAT0022311	miRNA	miR-356b-5p		0	3	0	0	0		1-3	0	0	0	0		NA	NA	NA	NA
MIMAT0032800	miRNA	miR-8193-3p		0	3	0	0	0		1-3	0	0	0	0		NA	NA	NA	NA
MIMAT0032830	miRNA	miR-8206-3p		0	3	0	2	0		1-3	13	13	11	6		0.9063	0.1326	0.9231	0.1088
MIMAT0032838	miRNA	miR-8210-3p		0	3	7	2	1		1-3	0	3	0	0		0.15	0.2121	0	0
MIMAT0019986	miRNA	miR-4805-5p		0	2	4	0	0		1-3	0	0	0	0		0	0	NA	NA
MIMAT0020303	miRNA	miR-35-5p		0	2	1	21	10		1-3	0	0	0	0		0	0	0	0
MIMAT0020341	miRNA	miR-255-5p		0	2	0	4	9		1-3	0	0	0	0		NA	NA	0	0
MIMAT0020347	miRNA	miR-784-3p		0	2	1	3	1		1-3	0	0	0	0		0	0	0	0
MIMAT0032791	miRNA	miR-8189-5p		0	2	0	0	1		1-3	0	0	0	0		NA	NA	NA	NA
MIMAT0032804	miRNA	miR-8195-3p		0	2	0	12	4		1-3	0	0	0	0		NA	NA	0	0
MIMAT0032828	miRNA	miR-8205-3p		0	2	0	0	1		1-3	0	0	0	0		NA	NA	NA	NA
MIMAT0032845	miRNA	miR-8212-3p		0	2	2	0	0		1-3	0	0	0	0		0	0	NA	NA
MIMAT0006768	miRNA	miR-1828		0	1	0	0	0		1-3	0	0	0	0		NA	NA	NA	NA
MIMAT0011457	miRNA	miR-2218b-5p		0	1	0	0	0		1-3	0	0	0	0		NA	NA	NA	NA
MIMAT0019987	miRNA	miR-4805-3p		0	1	6	2	1		1-3	0	0	1	0		0	0	0.1667	0.2357
MIMAT0020315	miRNA	miR-66-3p		0	1	2	12	3		1-3	0	0	1	1		0	0	0.1635	0.1224
MIMAT0032788	miRNA	miR-8187-3p		0	1	4	1	4		1-3	1	2	2	2		0.4167	0.1179	0.5	0.2357
MIMAT0032789	miRNA	miR-8188-5p		0	1	4	1	4		1-3	1	2	2	2		0.4167	0.1179	0.5	0.2357
MIMAT0032792	miRNA	miR-8189-3p		0	1	8	8	4		1-3	0	0	0	0		0	0	0	0
MIMAT0032810	miRNA	miR-8198-3p		0	1	2	18	13		1-3	0	0	2	0		0	0	0.05	0.0707
MIMAT0032832	miRNA	miR-8207-3p		0	1	3	1	0		1-3	0	0	0	0		0	0	NA	NA
MIMAT0049029	miRNA	miR-55b		0	1	1	1	0		1-3	0	0	0	0		0	0	NA	NA
MIMAT0000027	miRNA	miR-56-5p		0	0	2	12	14		1-3	0	0	0	0		NA	NA	0	0
MIMAT0000323	miRNA	miR-267		0	0	0	0	0		1-3	0	0	0	0		NA	NA	NA	NA
MIMAT0000696	miRNA	miR-354-3p		0	0	0	0	1		1-3	0	0	0	0		NA	NA	NA	NA
MIMAT0000698	miRNA	miR-356a		0	0	0	0	0		1-3	0	0	0	0		NA	NA	NA	NA
MIMAT0000702	miRNA	miR-360-3p		0	0	0	0	0		1-3	0	0	0	0		NA	NA	NA	NA
MIMAT0000768	miRNA	miR-392-3p		0	0	0	1	0		1-3	0	0	0	0		NA	NA	NA	NA
MIMAT0004232	miRNA	miR-797-5p		0	0	14	1	0		1-3	0	0	0	0		NA	NA	NA	NA
MIMAT0004233	miRNA	miR-798		0	0	2	8	4		1-3	0	0	0	0		NA	NA	0	0
MIMAT0005032	miRNA	miR-1019-3p		0	0	0	0	0		1-3	0	0	0	0		NA	NA	NA	NA
MIMAT0005522	miRNA	miR-1021		0	0	0	0	0		1-3	0	0	0	0		NA	NA	NA	NA
MIMAT0005822	miRNA	miR-1019-5p		0	0	0	0	0		1-3	0	0	1	0		NA	NA	NA	NA
MIMAT0006585	miRNA	miR-1818		0	0	0	0	0		1-3	0	0	0	0		NA	NA	NA	NA
MIMAT0011426	miRNA	miR-2207-3p		0	0	0	0	0		1-3	0	0	0	0		NA	NA	NA	NA
MIMAT0011428	miRNA	miR-2208a-3p		0	0	2	0	0		1-3	0	0	0	0		NA	NA	NA	NA
MIMAT0011431	miRNA	miR-2209a-5p		0	0	0	0	0		1-3	0	0	0	0		NA	NA	NA	NA
MIMAT0011433	miRNA	miR-2209c-5p		0	0	0	0	0		1-3	0	0	0	0		NA	NA	NA	NA
MIMAT0011438	miRNA	miR-2211-3p		0	0	0	0	0		1-3	0	0	0	0		NA	NA	NA	NA
MIMAT0011440	miRNA	miR-2212-3p		0	0	0	0	0		1-3	0	0	0	0		NA	NA	NA	NA
MIMAT0011441	miRNA	miR-2213-5p		0	0	0	0	0		1-3	0	0	0	0		NA	NA	NA	NA
MIMAT0011442	miRNA	miR-2213-3p		0	0	0	0	0		1-3	0	0	0	0		NA	NA	NA	NA
MIMAT0011445	miRNA	miR-2215-5p		0	0	0	0	0		1-3	0	0	0	0		NA	NA	NA	NA
MIMAT0011446	miRNA	miR-2215-3p		0	0	8	0	0		1-3	0	0	0	0		NA	NA	NA	NA
MIMAT0011448	miRNA	miR-2216-3p		0	0	0	0	0		1-3	0	0	0	0		NA	NA	NA	NA
MIMAT0011451	miRNA	miR-2217a-5p		0	0	0	0	0		1-3	0	0	0	0		NA	NA	NA	NA
MIMAT0011453	miRNA	miR-2209b-5p		0	0	1	0	0		1-3	0	0	0	0		NA	NA	NA	NA
MIMAT0011454	miRNA	miR-2209b-3p		0	0	1	6	0		1-3	0	0	1	0		NA	NA	NA	NA
MIMAT0011455	miRNA	miR-2218a-5p		0	0	0	0	1		1-3	0	0	0	0		NA	NA	NA	NA
MIMAT0011456	miRNA	miR-2218a-3p		0	0	0	0	0		1-3	0	0	0	0		NA	NA	NA	NA
MIMAT0011458	miRNA	miR-2218b-3p		0	0	0	4	0		1-3	0	0	0	0		NA	NA	NA	NA
MIMAT0011461	miRNA	miR-2220-5p		0	0	0	2	1		1-3	0	0	0	0		NA	NA	0	0
MIMAT0014446	miRNA	miR-2953-5p		0	0	6	0	1		1-3	0	0	0	0		NA	NA	NA	NA
MIMAT0014447	miRNA	miR-2953-3p		0	0	0	0	0		1-3	0	0	0	0		NA	NA	NA	NA
MIMAT0015105	miRNA	miR-64-3p		0	0	0	0	0		1-3	0	0	0	0		NA	NA	NA	NA
MIMAT0015106	miRNA	miR-65-3p		0	0	7	4	4		1-3	0	0	0	0		NA	NA	0	0
MIMAT0015115	miRNA	miR-239b-3p		0	0	0	0	0		1-3	0	0	0	0		NA	NA	NA	NA
MIMAT0015118	miRNA	miR-244-3p		0	0	1	12	11		1-3	0	0	1	0		NA	NA	0.0385	0.0544
MIMAT0015119	miRNA	miR-247-5p		0	0	3	1	0		1-3	0	0	0	0		NA	NA	NA	NA
MIMAT0015239	miRNA	miR-786-5p		0	0	0	2	5		1-3	0	0	1	0		NA	NA	0.1667	0.2357
MIMAT0019989	miRNA	miR-4806-3p		0	0	0	0	1		1-3	0	0	0	0		NA	NA	NA	NA
MIMAT0019991	miRNA	miR-4808-5p		0	0	0	0	0		1-3	0	0	0	0		NA	NA	NA	NA
MIMAT0019993	miRNA	miR-4809-5p		0	0	0	0	0		1-3	0	0	0	0		NA	NA	NA	NA
MIMAT0019995	miRNA	miR-4810a		0	0	1	0	0		1-3	0	0	0	0		NA	NA	NA	NA
MIMAT0019996	miRNA	miR-4811-5p		0	0	5	1	0		1-3	0	0	0	0		NA	NA	NA	NA
MIMAT0020004	miRNA	miR-4815		0	0	0	0	0		1-3	0	0	0	0		NA	NA	NA	NA
MIMAT0020127	miRNA	miR-4921		0	0	0	0	0		1-3	0	0	0	0		NA	NA	NA	NA
MIMAT0020129	miRNA	miR-4923a		0	0	0	0	0		1-3	0	0	0	0		NA	NA	NA	NA
MIMAT0020130	miRNA	miR-4924		0	0	0	0	0		1-3	0	0	0	0		NA	NA	NA	NA
MIMAT0020132	miRNA	miR-4925		0	0	0	0	0		1-3	0	0	0	0		NA	NA	NA	NA
MIMAT0020133	miRNA	miR-4926		0	0	2	9	14		1-3	0	0	0	0		NA	NA	0	0
MIMAT0020134	miRNA	miR-4927		0	0	0	0	0		1-3	0	0	0	0		NA	NA	NA	NA
MIMAT0020136	miRNA	miR-4930		0	0	0	0	0		1-3	0	0	0	0		NA	NA	NA	NA
MIMAT0020137	miRNA	miR-4931		0	0	0	0	0		1-3	0	0	0	0		NA	NA	NA	NA
MIMAT0020138	miRNA	miR-4932		0	0	0	0	0		1-3	0	0	0	0		NA	NA	NA	NA
MIMAT0020139	miRNA	miR-4933		0	0	0	0	0		1-3	0	0	0	0		NA	NA	NA	NA
MIMAT0020140	miRNA	miR-4934		0	0	8	0	0		1-3	0	0	0	0		NA	NA	NA	NA
MIMAT0020141	miRNA	miR-4935		0	0	0	0	0		1-3	0	0	0	0		NA	NA	NA	NA
MIMAT0020143	miRNA	miR-4937		0	0	0	16	6		1-3	0	0	0	0		NA	NA	0	0
MIMAT0020144	miRNA	miR-4938		0	0	0	0	0		1-3	0	0	0	0		NA	NA	NA	NA
MIMAT0020305	miRNA	miR-38-5p		0	0	1	16	14		1-3	0	0	0	0		NA	NA	0	0
MIMAT0020308	miRNA	miR-43-5p		0	0	2	22	26		1-3	0	0	2	2		NA	NA	0.0774	0.0084
MIMAT0020321	miRNA	miR-76-5p		0	0	0	2	0		1-3	0	0	0	0		NA	NA	NA	NA
MIMAT0020331	miRNA	miR-235-5p		0	0	16	22	23		1-3	0	1	0	0		NA	NA	0	0
MIMAT0020336	miRNA	miR-245-5p		0	0	0	2	0		1-3	0	0	0	0		NA	NA	NA	NA
MIMAT0020338	miRNA	miR-249-5p		0	0	2	0	0		1-3	0	0	0	0		NA	NA	NA	NA
MIMAT0020340	miRNA	miR-252-3p		0	0	0	0	0		1-3	0	0	0	0		NA	NA	NA	NA
MIMAT0020343	miRNA	miR-357-5p		0	0	0	0	0		1-3	0	0	0	0		NA	NA	NA	NA
MIMAT0020348	miRNA	miR-787-5p		0	0	0	0	0		1-3	0	0	0	0		NA	NA	NA	NA
MIMAT0020351	miRNA	miR-792-5p		0	0	0	0	0		1-3	0	0	0	0		NA	NA	NA	NA
MIMAT0020357	miRNA	miR-1022-3p		0	0	2	0	0		1-3	0	0	0	0		NA	NA	NA	NA
MIMAT0020358	miRNA	miR-1819-5p		0	0	1	1	0		1-3	0	0	0	0		NA	NA	NA	NA
MIMAT0020360	miRNA	miR-1824-3p		0	0	0	0	0		1-3	0	0	0	0		NA	NA	NA	NA
MIMAT0022181	miRNA	miR-5545-5p		0	0	0	0	0		1-3	0	0	0	0		NA	NA	NA	NA
MIMAT0022183	miRNA	miR-5546-5p		0	0	5	0	0		1-3	0	0	0	0		NA	NA	NA	NA
MIMAT0022186	miRNA	miR-5547-3p		0	0	0	0	0		1-3	0	0	0	0		NA	NA	NA	NA
MIMAT0022187	miRNA	miR-5548-5p		0	0	0	0	0		1-3	0	0	0	0		NA	NA	NA	NA
MIMAT0022188	miRNA	miR-5548-3p		0	0	0	1	0		1-3	0	0	0	0		NA	NA	NA	NA
MIMAT0022189	miRNA	miR-5549-5p		0	0	0	0	0		1-3	0	0	1	0		NA	NA	NA	NA
MIMAT0022194	miRNA	miR-5551-3p		0	0	0	0	0		1-3	0	1	0	0		NA	NA	NA	NA
MIMAT0022197	miRNA	miR-5553-5p		0	0	0	0	0		1-3	0	0	0	0		NA	NA	NA	NA
MIMAT0022308	miRNA	miR-5593-3p		0	0	0	0	0		1-3	0	0	0	0		NA	NA	NA	NA
MIMAT0022308_1	miRNA	miR-5593-3p		0	0	0	0	0		1-3	0	0	0	0		NA	NA	NA	NA
MIMAT0022313	miRNA	miR-5595-5p		0	0	0	0	0		1-3	0	0	0	0		NA	NA	NA	NA
MIMAT0022314	miRNA	miR-5595-3p		0	0	2	0	0		1-3	0	1	0	0		NA	NA	NA	NA
MIMAT0031894	miRNA	miR-354-5p		0	0	0	0	0		1-3	0	0	0	0		NA	NA	NA	NA
MIMAT0031895	miRNA	miR-355-3p		0	0	0	0	0		1-3	0	0	0	0		NA	NA	NA	NA
MIMAT0031896	miRNA	lsy-6-5p		0	0	0	0	0		1-3	0	0	0	0		NA	NA	NA	NA
MIMAT0032015	miRNA	miR-785-5p		0	0	0	0	0		1-3	0	0	0	0		NA	NA	NA	NA
MIMAT0032034	miRNA	miR-1821-5p		0	0	1	2	0		1-3	0	0	0	0		NA	NA	NA	NA
MIMAT0032035	miRNA	miR-1823-5p		0	0	1	0	1		1-3	0	0	0	0		NA	NA	NA	NA
MIMAT0032787	miRNA	miR-8187-5p		0	0	0	0	0		1-3	0	0	0	0		NA	NA	NA	NA
MIMAT0032790	miRNA	miR-8188-3p		0	0	0	0	0		1-3	0	0	0	0		NA	NA	NA	NA
MIMAT0032793	miRNA	miR-8190-5p		0	0	0	0	0		1-3	0	0	0	0		NA	NA	NA	NA
MIMAT0032794	miRNA	miR-8190-3p		0	0	0	1	0		1-3	0	0	0	0		NA	NA	NA	NA
MIMAT0032795	miRNA	miR-8191-5p		0	0	0	1	0		1-3	0	0	0	0		NA	NA	NA	NA
MIMAT0032796	miRNA	miR-8191-3p		0	0	1	1	0		1-3	0	0	0	0		NA	NA	NA	NA
MIMAT0032801	miRNA	miR-8194-5p		0	0	0	0	0		1-3	0	0	0	0		NA	NA	NA	NA
MIMAT0032802	miRNA	miR-8194-3p		0	0	0	0	0		1-3	0	0	0	0		NA	NA	NA	NA
MIMAT0032803	miRNA	miR-8195-5p		0	0	0	0	0		1-3	0	0	0	0		NA	NA	NA	NA
MIMAT0032807	miRNA	miR-8197-5p		0	0	0	0	0		1-3	0	0	0	0		NA	NA	NA	NA
MIMAT0032808	miRNA	miR-8197-3p		0	0	0	0	0		1-3	0	0	0	0		NA	NA	NA	NA
MIMAT0032809	miRNA	miR-8198-5p		0	0	0	0	0		1-3	0	0	0	0		NA	NA	NA	NA
MIMAT0032812	miRNA	miR-8199-3p		0	0	0	0	0		1-3	0	0	0	0		NA	NA	NA	NA
MIMAT0032813	miRNA	miR-8200-5p		0	0	0	0	0		1-3	0	0	0	0		NA	NA	NA	NA
MIMAT0032816	miRNA	miR-8201-3p		0	0	1	3	0		1-3	0	0	0	0		NA	NA	NA	NA
MIMAT0032818	miRNA	miR-8202-3p		0	0	0	0	0		1-3	0	0	0	0		NA	NA	NA	NA
MIMAT0032819	miRNA	miR-8203-5p		0	0	0	0	0		1-3	0	0	0	0		NA	NA	NA	NA
MIMAT0032820	miRNA	miR-8203-3p		0	0	0	1	0		1-3	0	0	0	0		NA	NA	NA	NA
MIMAT0032821	miRNA	miR-4810b-5p		0	0	0	1	4		1-3	0	0	0	0		NA	NA	0	0
MIMAT0032824	miRNA	miR-8204-3p		0	0	0	0	0		1-3	0	0	0	0		NA	NA	NA	NA
MIMAT0032825	miRNA	miR-8196b-5p		0	0	0	0	0		1-3	0	0	0	0		NA	NA	NA	NA
MIMAT0032827	miRNA	miR-8205-5p		0	0	6	0	1		1-3	0	1	0	0		NA	NA	NA	NA
MIMAT0032831	miRNA	miR-8207-5p		0	0	0	0	0		1-3	0	0	0	0		NA	NA	NA	NA
MIMAT0032834	miRNA	miR-8208-3p		0	0	0	0	1		1-3	0	0	0	0		NA	NA	NA	NA
MIMAT0032835	miRNA	miR-8209-5p		0	0	0	0	1		1-3	0	0	0	0		NA	NA	NA	NA
MIMAT0032836	miRNA	miR-8209-3p		0	0	0	0	0		1-3	0	0	0	0		NA	NA	NA	NA
MIMAT0032837	miRNA	miR-8210-5p		0	0	1	1	0		1-3	0	0	0	0		NA	NA	NA	NA
MIMAT0032839	miRNA	miR-2217b-1-5p		0	0	0	0	0		1-3	0	0	0	0		NA	NA	NA	NA
MIMAT0032840	miRNA	miR-2217b-3p		0	0	0	3	0		1-3	0	0	0	0		NA	NA	NA	NA
MIMAT0032840_1	miRNA	miR-2217b-3p		0	0	0	3	0		1-3	0	0	0	0		NA	NA	NA	NA
MIMAT0032840_2	miRNA	miR-2217b-3p		0	0	0	3	0		1-3	0	0	0	0		NA	NA	NA	NA
MIMAT0032840_3	miRNA	miR-2217b-3p		0	0	0	3	0		1-3	0	0	0	0		NA	NA	NA	NA
MIMAT0032841	miRNA	miR-2217b-5p		0	0	0	0	0		1-3	0	0	0	0		NA	NA	NA	NA
MIMAT0032841_1	miRNA	miR-2217b-5p		0	0	0	0	0		1-3	0	0	0	0		NA	NA	NA	NA
MIMAT0032841_2	miRNA	miR-2217b-5p		0	0	0	0	0		1-3	0	0	0	0		NA	NA	NA	NA
MIMAT0032843	miRNA	miR-8211-3p		0	0	6	0	1		1-3	0	0	0	0		NA	NA	NA	NA
MIMAT0032844	miRNA	miR-8212-5p		0	0	2	0	0		1-3	0	0	0	0		NA	NA	NA	NA
MIMAT0049028	miRNA	miR-12134		0	0	0	0	0		1-3	0	0	0	0		NA	NA	NA	NA
WBGene00006438	nrfl-1 23H-RNAs	WBGene00006438		0	630584	1566475	8871	9915		1-3	14694	37696	710	375		0.0231	0.0005	0.0553	0.0266
