# Supplementary material for: A low-abundance class of Dicer-dependent siRNAs produced from a variety of features in C. elegans
Source: HighWire-hosted journal article supplement (doi:10.1101/gr.279083.124), 2024-12-01
Supplement: Supplemental_Table_S8.xlsx [file Supplemental_Table_S8.xlsx]

## Sheet: Table S8
Supplemental Table S8. Geometric mean-normalized sRNA-seq read counts and statistical analysis for GFP::RDE-1 co-IP and cell lysates.
Feature ID	Classifier	Feature Name	GFP::RDE-1 co-IP rep 1	GFP::RDE-1 co-IP rep 2	input rep 1	input rep 2	log2 fold change	lfcSE	stat	p-value	adjusted p-value
AGACATCTCAGAAACATCGGCA	23H-RNA	F43E2.6	2368.3	2894.11	0	0.827412	12.6121	1.04112	12.1141	8.8961e-34	5.50722e-32
TCATCAGCTCCATCAACACCACC	23H-RNA	C36A4.14	1483.07	1124.21	0	0.413706	12.5967	1.45781	8.64087	5.57849e-18	2.14104e-16
TTTTGTTTCTCTTCCTCTTGCTT	23H-RNA	F19B2.5	305.339	591.359	0	0	12.5035	1.4983	8.34512	7.11426e-17	2.61978e-15
CGACGATGGCTGCGGCGAGGATG	23H-RNA	Y57G11C.1145_hairpin	420.803	1949.6	0	0.413706	12.4636	1.94822	6.3974	1.58044e-10	3.5949e-09
GAAGGCGCGCTCGAAGAGCCGAGA	23H-RNA	ChrIII_hairpin1	246.324	618.524	0	0	12.4515	1.51734	8.20612	2.28442e-16	8.08666e-15
CAAGAGGAAGAGAAACAAAAGG	23H-RNA	F19B2.5	305.339	438.817	0	0	12.234	1.48656	8.22975	1.87608e-16	6.69153e-15
AGTAATATACCGCTACACCAACC	23H-RNA	ChrII_intergenic1	377.183	344.785	0	0	12.187	1.47936	8.23803	1.7507e-16	6.27719e-15
TCATCCTCGCCGCAGCCATCGTC	23H-RNA	Y57G11C.1145_hairpin	320.734	386.577	0	0	12.1598	1.4818	8.20609	2.28504e-16	8.08666e-15
TTTTGGGGGGCAGAAATCGGAA	23H-RNA	PAL8C	289.943	403.294	0	0	12.1317	1.48717	8.15759	3.41766e-16	1.20015e-14
TTTTGGGGGGCAGAAATCGGAAA	23H-RNA	PAL8C	233.494	420.011	0	0	12.0475	1.50236	8.01902	1.06591e-15	3.65821e-14
AGTGGGCCGAGCGATTCGCTGAT	23H-RNA	Y116A8C.27	182.177	428.369	0	0	11.9498	1.5232	7.8452	4.32263e-15	1.37929e-13
GTCGTCGTCATCCACTCCACCGA	23H-RNA	Y57G11C.1145_hairpin	282.246	321.799	0	0	11.9317	1.48546	8.03231	9.56531e-16	3.29943e-14
TTCTCTCGTAGAACGTGTCGCTT	23H-RNA	F55A4.9, rncs-1	187.309	413.742	0	0	11.9272	1.51909	7.85153	4.10977e-15	1.31754e-13
TGTGGGCGGGGCCAATCCGGAAT	23H-RNA	H15N14.4, Y24F12A.3, Y24F12A.4	174.479	409.563	0	0	11.8859	1.52468	7.79567	6.4066e-15	2.01129e-13
ACATCTCAGAAACATCGGCAA	23H-RNA	F43E2.6	1613.93	1448.1	0.427673	0.413706	11.8293	1.04169	11.3558	6.93976e-30	3.7671e-28
TCCGATTTCTGCCCCCCCAAAA	23H-RNA	PAL8C	200.138	330.158	0	0	11.7461	1.50448	7.80743	5.83636e-15	1.84075e-13
TCAGGCCGCCGACATCTCATGGG	23H-RNA	PALTA3	148.821	365.681	0	0	11.7033	1.53325	7.63298	2.2938e-14	7.03898e-13
TCTCGTAGAACGTGTCGCTTCG	23H-RNA	F55A4.9, rncs-1	228.363	273.738	0	0	11.6655	1.4933	7.81189	5.63357e-15	1.78922e-13
AACTTCTTCCACGCCATCATCC	23H-RNA	Y57G11C.1145_hairpin	261.719	240.305	0	0	11.6629	1.49157	7.81917	5.31717e-15	1.69267e-13
CATGTATTAAACGGTAAGGGCCGG	23H-RNA	mir-5592	92.3714	394.936	0	0	11.6213	2.27729	5.1031	3.34128e-07	5.18507e-06
ATCCTTGTACCAGTTATCTGCA	23H-RNA	K02E2.11	143.689	340.606	0	0	11.6161	1.53303	7.57717	3.53173e-14	1.06225e-12
TCTTAGAACCCATATATACCCCC	23H-RNA	Y116F11A.1	692.785	618.524	0	0.413706	11.6056	1.46106	7.94325	1.9695e-15	6.65866e-14
TGCTTTCCTCATCTCTGATCTT	23H-RNA	F55A4.9, rncs-1	541.399	756.438	0	0.413706	11.5935	1.46774	7.8989	2.81372e-15	9.26012e-14
TGATGCGGTTGTTCCAAAGAATC	23H-RNA	F55A4.9, rncs-1	153.952	321.799	0	0	11.5903	1.52432	7.60359	2.88036e-14	8.77418e-13
CCGCCCACAGTTCTGTACCTTGC	23H-RNA	Y24F12A.3, Y24F12A.4	243.758	229.857	0	0	11.5791	1.49372	7.75181	9.05891e-15	2.83091e-13
CCGATTTCTGCCCCCCCAAAATGT	23H-RNA	PAL8C	236.06	231.946	0	0	11.5623	1.49402	7.73902	1.00188e-14	3.12372e-13
CGATGGCTGCGGCGAGGATGATGT	23H-RNA	Y57G11C.1145_hairpin	23.0928	436.728	0	0	11.5371	3.35486	3.43893	0.000584015	0.00546887
ACCACTTCCGCAGACGCTACAAC	23H-RNA	Y37E3.30	182.177	275.828	0	0	11.5345	1.5059	7.65951	1.86638e-14	5.7663e-13
TTGCTTTCCTCATCTCTGATCTT	23H-RNA	F55A4.9, rncs-1	174.479	275.828	0	0	11.5103	1.50885	7.62849	2.3752e-14	7.27239e-13
CATCGTCGTCGTCATCCACTCCA	23H-RNA	Y57G11C.1145_hairpin	225.797	215.229	0	0	11.4763	1.49679	7.66728	1.75684e-14	5.44021e-13
ATGATGGCGTGGAAGAAGTTGAT	23H-RNA	Y57G11C.1145_hairpin	38.4881	399.115	0	0	11.4658	2.98246	3.84441	0.000120841	0.00129745
CATCGTCGTCGTCATCCACTCC	23H-RNA	Y57G11C.1145_hairpin	151.386	277.918	0	0	11.442	1.52002	7.5275	5.17225e-14	1.53534e-12
TTCGCTCTCGATTTCGCATGCCG	23H-RNA	dnj-27_element	143.689	282.097	0	0	11.4303	1.52496	7.49548	6.60541e-14	1.95225e-12
TCGTCGTCGTCATCCACTCCACC	23H-RNA	Y57G11C.1145_hairpin	1077.67	1191.08	0.855345	0	11.3973	1.04478	10.9088	1.04609e-27	5.35825e-26
CTCAAAATAATAAAACTGCGTGG	23H-RNA	PALTA3	151.386	259.111	0	0	11.3772	1.51778	7.49593	6.58311e-14	1.94989e-12
TTAAACGCAGCGGCGCGCGGAAC	23H-RNA	PALTA3	415.671	677.033	0	0.413706	11.346	1.47781	7.67753	1.62186e-14	5.03369e-13
CTCGGCATTCAGAGGCAACTTCC	23H-RNA	Unknown_RE3	192.44	208.961	0	0	11.3417	1.50161	7.55304	4.252e-14	1.27326e-12
CAAGAGGAAGAGAAACAAAAGGA	23H-RNA	F19B2.5	100.069	284.187	0	0	11.2828	1.55957	7.2346	4.66892e-13	1.28773e-11
TCCCGCATTTTTTGTAGATCAAA	23H-RNA	CELE14B	125.728	248.663	0	0	11.2449	1.53205	7.33976	2.13973e-13	6.12474e-12
CGGAGCTCGGTTGTGTACGACC	23H-RNA	F49B2.3, Y116A8B.1	151.386	219.409	0	0	11.2297	1.51419	7.41627	1.20469e-13	3.52229e-12
TCCGATTTCTGCCCCCCCAAAAT	23H-RNA	PAL8C	466.989	516.133	0.427673	0	11.1913	1.46587	7.63453	2.26646e-14	6.97076e-13
ATGTGGATGATGGCGTGGAAGA	23H-RNA	Y57G11C.1145_hairpin	48.7516	309.262	0	0	11.1764	2.62333	4.26041	2.04051e-05	0.000248011
CCGATTTCTGCCCCCCCAAAATG	23H-RNA	PAL8C	366.92	593.448	0	0.413706	11.1599	1.47999	7.5405	4.68175e-14	1.39888e-12
TTAGATACCGTACCCCGAAAACT	23H-RNA	ChrIII_hairpin2	148.821	194.333	0	0	11.1172	1.51436	7.34119	2.117e-13	6.07245e-12
TCCTCATCTCTGATCTTTTCCA	23H-RNA	F55A4.9, rncs-1	135.991	206.871	0	0	11.117	1.52092	7.30942	2.68293e-13	7.61132e-12
AAAGAATCCATTGTCCAGCTCC	23H-RNA	F55A4.9, rncs-1	130.859	208.961	0	0	11.1044	1.52394	7.28667	3.17703e-13	8.8703e-12
CGCGCGCCGCTATGTTTAACTC	23H-RNA	PALTA3	133.425	204.781	0	0	11.0974	1.52217	7.29048	3.0885e-13	8.64082e-12
TGCTTTCCTCATCTCTGATCTTTT	23H-RNA	F55A4.9, rncs-1	97.5031	238.215	0	0	11.0882	1.55469	7.1321	9.88482e-13	2.65642e-11
WBGene00255572	pre-miRNA	mir-8189, R05C11.6	94.9372	238.215	0	0	11.0772	1.55739	7.11265	1.13837e-12	3.04123e-11
AATTCTCTCGTAGAACGTGTCGC	23H-RNA	F55A4.9, rncs-1	84.6737	246.574	0	0	11.069	1.57073	7.04705	1.82745e-12	4.82538e-11
TCGTCGTCGTCATCCACTCCACT	23H-RNA	Y57G11C.1145_hairpin	125.728	202.692	0	0	11.0553	1.52652	7.24216	4.41602e-13	1.22045e-11
CAGCGAATCGCTCTGCCCACTTT	23H-RNA	Y116A8C.27	161.65	167.169	0	0	11.0535	1.51227	7.30922	2.687e-13	7.61132e-12
ATGTGGATGATGGCGTGGAAGAA	23H-RNA	Y57G11C.1145_hairpin	51.3174	271.649	0	0	11.028	2.4724	4.46042	8.17982e-06	0.000104746
CTCTTCGAGCGCGTCTTCTTGC	23H-RNA	ChrIII_hairpin1	107.767	208.961	0	0	11.0038	1.54053	7.14289	9.13863e-13	2.46562e-11
AAGACATCTCAGAAACATCGGC	23H-RNA	F43E2.6	1247.01	1324.81	0.427673	0.827412	10.9938	0.860346	12.7783	2.16748e-37	1.47659e-35
CTGCGGCGAGGATGATGTGGATG	23H-RNA	Y57G11C.1145_hairpin	61.5809	246.574	0	0	10.9605	2.21877	4.9399	7.81631e-07	1.15632e-05
MIMAT0006775	miRNA	miR-1833	79.542	225.678	0	0	10.9512	1.57386	6.95814	3.44801e-12	8.91445e-11
ACGACGATGGCTGCGGCGAGG	23H-RNA	Y57G11C.1145_hairpin	84.6737	217.319	0	0	10.9358	1.56576	6.9843	2.86286e-12	7.4298e-11
CTCCTCGGTCTTGACGAAATCC	23H-RNA	C36A4.14	300.207	509.864	0	0.413706	10.9147	1.48656	7.34229	2.09967e-13	6.03544e-12
CGATGGCTGCGGCGAGGATGA	23H-RNA	Y57G11C.1145_hairpin	51.3174	246.574	0	0	10.9115	2.38845	4.56844	4.91372e-06	6.55082e-05
CGCGCGCCGCTATGTTTAACTCG	23H-RNA	PALTA3	100.069	196.423	0	0	10.9087	1.54574	7.05725	1.69827e-12	4.49299e-11
TGCTTTCCTCATCTCTGATCT	23H-RNA	F55A4.9, rncs-1	110.332	179.706	0	0	10.8762	1.53514	7.08482	1.39223e-12	3.69769e-11
WBGene00255574	pre-miRNA	mir-8208, T11G6.12	346.393	438.817	0	0.413706	10.8685	1.47419	7.37253	1.6742e-13	4.8431e-12
AAGACATCTCAGAAACATCGGCA	23H-RNA	F43E2.6	641.468	911.069	0	0.827412	10.8527	1.06127	10.2261	1.5152e-24	7.2184e-23
ACATCTCAGAAACATCGGCAAA	23H-RNA	F43E2.6	2324.68	2329.91	0.855345	1.65482	10.8494	0.618263	17.5482	6.13891e-69	8.53496e-67
AGACATCTCAGAAACATCGGCAA	23H-RNA	F43E2.6	2198.95	3222.17	0.427673	2.48224	10.8489	0.600673	18.0613	6.42819e-73	9.62462e-71
TCCGATTTCTGCCCCCCCAAAATG	23H-RNA	PAL8C	3363.86	7340.79	2.99371	2.89594	10.8285	0.508179	21.3084	9.48016e-101	2.15279e-98
AACTTCTTCCACGCCATCATCCA	23H-RNA	Y57G11C.1145_hairpin	515.74	248.663	0	0.413706	10.8247	1.50071	7.2131	5.46933e-13	1.49338e-11
TTTTTGCTGATCTCTCTTCTCGG	23H-RNA	ChrIII_hairpin1	166.782	583	0	0.413706	10.8039	1.54104	7.01077	2.37015e-12	6.18646e-11
TGCGTGGCGTGTACTGCAGAAAAC	23H-RNA	PALTA3	51.3174	223.588	0	0	10.7958	2.2999	4.69402	2.67886e-06	3.69428e-05
TCCGCGCGCCGCTATGTTTAACT	23H-RNA	PALTA3	800.552	1439.74	1.28302	0	10.794	0.895317	12.056	1.80263e-33	1.10634e-31
CTTTTGTTTCTCTTCCTCTTGCT	23H-RNA	F19B2.5	295.075	438.817	0	0.413706	10.7719	1.4822	7.26753	3.6613e-13	1.01599e-11
AGACATCTCAGAAACATCGGC	23H-RNA	F43E2.6	3315.11	3750.84	1.28302	2.89594	10.7154	0.493102	21.7305	1.05645e-104	2.71587e-102
AGAACGTGTCGCTTCGTCATCTG	23H-RNA	F55A4.9, rncs-1	130.859	560.015	0	0.413706	10.6854	1.91299	5.58569	2.3278e-08	4.18973e-07
MIMAT0020354	miRNA	miR-800-5p	1177.73	1590.19	0.855345	0.827412	10.6853	0.762735	14.0092	1.3685e-44	1.1033e-42
AGCGACACGTTCTACGAGGGAAT	23H-RNA	F55A4.9, rncs-1	74.4103	175.527	0	0	10.6631	1.57273	6.77997	1.20202e-11	2.98315e-10
CATCTCAGAAACATCGGCAAA	23H-RNA	F43E2.6	2183.56	2547.23	1.71069	1.24112	10.6504	0.58088	18.3349	4.35457e-75	6.6664e-73
CTCGTCGATCCAGTTTGGCCA	23H-RNA	F55A4.9, rncs-1	107.767	133.735	0	0	10.61	1.53722	6.9021	5.124e-12	1.30008e-10
ACGATGGCTGCGGCGAGGATGAT	23H-RNA	Y57G11C.1145_hairpin	79.542	160.9	0	0	10.6068	1.56373	6.78301	1.17694e-11	2.92625e-10
ATGTTTCTGAGATGTCTTCACA	23H-RNA	F43E2.6	97.5031	142.093	0	0	10.5999	1.54391	6.86565	6.61879e-12	1.67312e-10
MIMAT0020777	miRNA	miR-232-5p	16370.3	28621.3	13.6855	15.3071	10.5993	0.315721	33.5716	4.35609e-247	5.39562e-244
TTGGTTGGTCCCCGAATTTTGCC	23H-RNA	PALTA3	82.1079	152.541	0	0	10.5713	1.55968	6.77787	1.21961e-11	3.01036e-10
ACATCTCAGAAACATCGGCAAAT	23H-RNA	F43E2.6	5473	5286.7	0.855345	6.20559	10.57	1.07574	9.82581	8.7173e-23	3.91991e-21
CGATGTTTCTGAGATGTCTTC	23H-RNA	F43E2.6	898.055	1652.88	0.855345	0.827412	10.5679	0.790908	13.3617	1.01209e-40	7.45389e-39
TGAAGACATCTCAGAAACATC	23H-RNA	F43E2.6	2101.45	4212.65	2.56604	1.65482	10.5517	0.5573	18.9336	6.0265e-80	1.03938e-77
CACGGAGTTAAATTTGAATTTT	23H-RNA	Y69A2AR.16_hairpin	112.898	119.108	0	0	10.5506	1.53773	6.86117	6.82972e-12	1.72005e-10
MIMAT0022305	miRNA	miR-5592-5p	87.2396	142.093	0	0	10.5375	1.55339	6.7836	1.17218e-11	2.91974e-10
MIMAT0022305_1	miRNA	miR-5592-5p	87.2396	142.093	0	0	10.5375	1.55339	6.7836	1.17218e-11	2.91974e-10
ATCCTCGCCGCAGCCATCGTCGT	23H-RNA	Y57G11C.1145_hairpin	120.596	106.57	0	0	10.5184	1.54034	6.82863	8.57319e-12	2.15119e-10
TTCGAGACTCGTCAGATCTGC	23H-RNA	K02E2.6	105.201	119.108	0	0	10.5026	1.5415	6.81327	9.54029e-12	2.38946e-10
TTCCGCGCGCCGCTATGTTTAAC	23H-RNA	PALTA3	87.2396	135.824	0	0	10.4973	1.55333	6.75793	1.39982e-11	3.44269e-10
TTTTGGGGGGCAGAAATCGGA	23H-RNA	PAL8C	210.401	384.488	0	0.413706	10.47	1.4999	6.98049	2.94142e-12	7.61917e-11
TTTCTGAGATGTCTTCACAATTC	23H-RNA	F43E2.6	1824.33	2336.18	0.855345	2.06853	10.4663	0.589324	17.7599	1.44479e-70	2.09418e-68
TTTCCTCATCTCTGATCTTTTC	23H-RNA	F55A4.9, rncs-1	28.2246	188.065	0	0	10.4498	2.67116	3.91206	9.15113e-05	0.00100471
AGGCACAGTTCTGTGGGCGGGGC	23H-RNA	H15N14.4, H37A05.4, Y24F12A.3, Y24F12A.4	41.0539	173.437	0	0	10.4432	1.64195	6.36027	2.014e-10	4.54316e-09
CCATCGGACGAGCTCTTATCCCC	23H-RNA	T05E12.8	84.6737	129.556	0	0	10.4389	1.55608	6.70844	1.96712e-11	4.77753e-10
CTGTTCTGCTCTCTCTTTCAGCT	23H-RNA	F55A4.9, rncs-1	76.9761	135.824	0	0	10.4301	1.56491	6.665	2.64662e-11	6.405e-10
TGCTCGTCGATCCAGTTTGGCC	23H-RNA	F55A4.9, rncs-1	66.7127	142.093	0	0	10.4037	1.58026	6.58351	4.59455e-11	1.09826e-09
ATCGTCGTCGTCATCCACTCCACT	23H-RNA	Y57G11C.1145_hairpin	76.9761	127.466	0	0	10.372	1.56486	6.62806	3.40135e-11	8.1447e-10
TATCTCGATACCATGTCTCACC	23H-RNA	Y37E11B.2	279.68	271.649	0.427673	0	10.3556	1.48106	6.99203	2.70946e-12	7.04512e-11
TGATGGCGTGGAAGAAGTTGATG	23H-RNA	Y57G11C.1145_hairpin	61.5809	486.878	0	0.413706	10.3532	2.17291	4.76468	1.89152e-06	2.67621e-05
AATGAAACGAGTGCTGCGAAAAC	23H-RNA	Y116A8B.1	184.743	359.412	0	0.413706	10.3417	1.5071	6.86201	6.78997e-12	1.71321e-10
TGCCGATGTTTCTGAGATGTCTTC	23H-RNA	F43E2.6	356.656	2896.19	1.71069	0.827412	10.3298	0.870292	11.8694	1.70785e-32	9.94422e-31
TGGATGATGGCGTGGAAGAAGTT	23H-RNA	Y57G11C.1145_hairpin	1408.66	8333.35	3.84905	3.72335	10.3294	1.19097	8.67308	4.20573e-18	1.61873e-16
TTCTCTCGTAGAACGTGTCGCT	23H-RNA	F55A4.9, rncs-1	192.44	344.785	0	0.413706	10.3231	1.50228	6.87158	6.34948e-12	1.60802e-10
AAGAATCCATTGTCCAGCTCC	23H-RNA	F55A4.9, rncs-1	94.9372	102.391	0	0	10.3173	1.55293	6.64372	3.05853e-11	7.34965e-10
TAACGAGACCGCTGAAAAAGTT	23H-RNA	PAL5A	74.4103	121.197	0	0	10.3082	1.56826	6.57299	4.93157e-11	1.17675e-09
TTGCTTTCCTCATCTCTGATCTTT	23H-RNA	F55A4.9, rncs-1	71.8444	121.197	0	0	10.2894	1.57167	6.54676	5.87997e-11	1.39573e-09
TTCGAGACTCGTCAGATCTGCA	23H-RNA	K02E2.6	754.366	1312.27	0.427673	1.24112	10.2654	0.789934	12.9953	1.30119e-38	9.1859e-37
TAGATCAAACCGTCATGGGAC	23H-RNA	CELE14B	102.635	85.6739	0	0	10.2472	1.55943	6.57111	4.99421e-11	1.18877e-09
CCCGCGGGTGATGACAGAAACGG	23H-RNA	dnj-27_element	61.5809	125.376	0	0	10.2442	1.58787	6.45154	1.10719e-10	2.55685e-09
TCGTCGTCATCCACTCCACCG	23H-RNA	Y57G11C.1145_hairpin	100.069	83.5843	0	0	10.2111	1.56207	6.53689	6.28116e-11	1.48578e-09
CCGTGATGGGACAGCCTGACACC	23H-RNA	CELE14B	46.1857	135.824	0	0	10.2066	1.62276	6.28963	3.18232e-10	6.95974e-09
CGTGTCGCTTCGTCATCTGATGC	23H-RNA	F55A4.9, rncs-1	17.9611	162.989	0	0	10.1924	2.90868	3.50413	0.000458102	0.00438317
ATATTTGGAACAGAAGCAAGA	23H-RNA	F19B2.5	71.8444	108.66	0	0	10.1918	1.5727	6.48044	9.14548e-11	2.12278e-09
ACGACGACGATGGCTGCGGCGAG	23H-RNA	Y57G11C.1145_hairpin	84.6737	96.1219	0	0	10.1915	1.56276	6.52149	6.96101e-11	1.63806e-09
TCTCGTAGAACGTGTCGCTTCGT	23H-RNA	F55A4.9, rncs-1	41.0539	137.914	0	0	10.1824	1.63767	6.21763	5.04726e-10	1.0864e-08
TGAAATCGTGGGCGGGGCTTAAA	23H-RNA	mir-5550_RE	38.4881	140.004	0	0	10.1787	1.64607	6.1836	6.2654e-10	1.34435e-08
TCCACGGCGGCCGACAATTTCCG	23H-RNA	Unknown_hairpin_RE2	120.596	58.509	0	0	10.171	1.59357	6.3825	1.74223e-10	3.95631e-09
CTCCTCGGTCTTGACGAAATCCC	23H-RNA	C36A4.14	1280.37	2051.99	0	2.89594	10.1643	1.81165	5.61051	2.0173e-08	3.64533e-07
TGACATCCCTTCTGATCGTGGA	23H-RNA	E01G4.7	89.8055	87.7635	0	0	10.164	1.56371	6.49996	8.03429e-11	1.87123e-09
ATTCTCTCGTAGAACGTGTCGCT	23H-RNA	F55A4.9, rncs-1	356.656	603.896	0	0.827412	10.1614	1.08453	9.36937	7.29658e-21	3.07789e-19
ATTCTCTCGTAGAACGTGTCGC	23H-RNA	F55A4.9, rncs-1	100.069	77.3154	0	0	10.1602	1.56803	6.47962	9.19519e-11	2.13069e-09
MIMAT0032017	miRNA	miR-789-2-5p	146678	350304	188.176	246.155	10.1601	0.615573	16.5052	3.36772e-61	4.02501e-59
CGATGCTCGTCGATCCAGTTTGGC	23H-RNA	F55A4.9, rncs-1	17.9611	158.81	0	0	10.1587	2.89049	3.51454	0.000440522	0.00422982
WBGene00219223	pre-miRNA	mir-4814, W06F12.9	59.015	117.018	0	0	10.1573	1.59234	6.37883	1.78442e-10	4.03196e-09
TATTAAACGGTAAGGGCCGGCTGG	23H-RNA	mir-5592	35.9222	137.914	0	0	10.1406	1.65473	6.12825	8.88518e-10	1.87982e-08
TACGAGGGAATTGACTAGTTTCA	23H-RNA	F55A4.9, rncs-1	56.4492	117.018	0	0	10.1363	1.59745	6.34528	2.22017e-10	4.97529e-09
TGAAAGGATCGGGACGATTAGG	23H-RNA	ChrX_intergenic1	43.6198	129.556	0	0	10.1349	1.62934	6.22026	4.96344e-10	1.07025e-08
TATTAAACGGTAAGGGCCGGCTG	23H-RNA	mir-5592	17968.8	32566.5	23.0943	21.9264	10.1328	0.303884	33.3443	8.80524e-244	9.99761e-241
ATATTTGGAACAGAAGCAAGAGG	23H-RNA	F19B2.5	297.641	1111.67	0.427673	0.827412	10.1287	0.983016	10.3037	6.77841e-25	3.25197e-23
CATCTCAGAAACATCGGCAAAT	23H-RNA	F43E2.6	3204.77	3811.44	2.99371	3.30965	10.1198	0.419272	24.1365	1.0353e-128	4.1488e-126
TGATCTACAAAAAATGCGGGAAT	23H-RNA	CELE14B	89.8055	81.4947	0	0	10.1114	1.56833	6.44727	1.13886e-10	2.62555e-09
CTAAATACTGGAGCAGCGCAACC	23H-RNA	F52G3.8	69.2785	100.301	0	0	10.1014	1.57761	6.40295	1.52405e-10	3.47827e-09
CATGTATTAAACGGTAAGGGC	23H-RNA	mir-5592	17160.5	25227.8	25.6604	13.2386	10.0929	0.300407	33.5974	1.83086e-247	2.49455e-244
CATCATCCTCGCCGCAGCCATCG	23H-RNA	Y57G11C.1145_hairpin	669.692	697.929	0	1.24112	10.0834	0.872824	11.5526	7.16125e-31	4.01531e-29
CTTTTGTTTCTCTTCCTCTTGC	23H-RNA	F19B2.5	105.201	62.6882	0	0	10.0787	1.5866	6.35243	2.11934e-10	4.75717e-09
CGATGCTCGTCGATCCAGTTTGG	23H-RNA	F55A4.9, rncs-1	41.0539	125.376	0	0	10.0777	1.63673	6.1572	7.40401e-10	1.57624e-08
CATCTCAGAAACATCGGCAAATG	23H-RNA	F43E2.6	206589	362361	268.578	261.876	10.0669	0.258252	38.9809	0	0
TTCGAGACTCGTCAGATCTGCAT	23H-RNA	K02E2.6	82.1079	83.5843	0	0	10.0646	1.57164	6.40386	1.51496e-10	3.46332e-09
CGACGATGGCTGCGGCGAGGATGA	23H-RNA	Y57G11C.1145_hairpin	25.6587	137.914	0	0	10.053	1.69826	5.91957	3.22792e-09	6.46107e-08
AGCTAGCTTCACAACAATTGACC	23H-RNA	W03D2.15	225.797	219.409	0	0.413706	10.0479	1.48973	6.74478	1.53257e-11	3.76239e-10
TTTGCCGATGTTTCTGAGATGT	23H-RNA	F43E2.6	271710	599803	358.817	473.693	10.0318	0.575033	17.4456	3.71621e-68	5.06333e-66
AATTCTCTCGTAGAACGTGTCGCT	23H-RNA	F55A4.9, rncs-1	15.3952	146.272	0	0	10.0299	2.94547	3.40521	0.000661133	0.00607413
AGCCGTGGTCGATGCTGAAAGG	23H-RNA	F55A4.9, rncs-1	595.282	1163.91	1.71069	0	10.0294	0.808615	12.4032	2.51026e-35	1.62096e-33
TCCCACGATTTCATTTGCACTG	23H-RNA	Unknown_RE7	64.1468	96.1219	0	0	10.0202	1.58596	6.31808	2.64825e-10	5.85754e-09
CCAAACTGGATTGACGAGCATC	23H-RNA	F55A4.9, rncs-1	46.1857	112.839	0	0	10.0116	1.62141	6.17463	6.6319e-10	1.42075e-08
CCCCGTGAGGACCGTGTACGCCC	23H-RNA	Y116A8B.1	66.7127	91.9427	0	0	10.0049	1.58346	6.31839	2.64299e-10	5.8554e-09
CGATGGCTGCGGCGAGGATGATG	23H-RNA	Y57G11C.1145_hairpin	851.869	4229.36	1.28302	3.72335	9.98503	1.27221	7.84856	4.20847e-15	1.34602e-13
CCCTTACCGTTTAATACATGTT	23H-RNA	mir-5592	74.4103	81.4947	0	0	9.9775	1.5796	6.31646	2.67626e-10	5.90989e-09
TGGAGACCCTCACCTACCTGCG	23H-RNA	other, Y116A8B.1	33.3563	121.197	0	0	9.97128	1.66353	5.99404	2.04685e-09	4.19373e-08
TGTATTAAACGGTAAGGGCCGGC	23H-RNA	mir-5592	307155	473841	383.622	398.399	9.96388	0.22495	44.2938	0	0
MIMAT0015110	miRNA	miR-84-3p	64234	89247.1	44.478	111.701	9.94037	0.647948	15.3413	4.04927e-53	4.24395e-51
CATGTATTAAACGGTAAGGGCC	23H-RNA	mir-5592	22151.2	31981.4	25.6604	29.7868	9.93055	0.249237	39.8438	0	0
CGATGGATTCTTTGGAGCAAC	23H-RNA	F55A4.9, rncs-1	56.4492	94.0323	0	0	9.93012	1.59966	6.20766	5.378e-10	1.15576e-08
TTGGACTTTTTCGCTGGTTTGGT	23H-RNA	F55A4.9, rncs-1	20.527	129.556	0	0	9.92899	1.7275	5.74762	9.05059e-09	1.69854e-07
ACATCTCAGAAACATCGGCAAATG	23H-RNA	F43E2.6	223.231	988.384	0	1.24112	9.91405	1.01717	9.74672	1.90516e-22	8.45533e-21
TGAAGAGGCAGGGTCCGGTTGC	23H-RNA	Y57G11C.1145_hairpin	839.04	1569.29	0.855345	1.65482	9.90105	0.675922	14.6482	1.38305e-48	1.27325e-46
ATCGTCGTCGTCATCCACTCCAC	23H-RNA	Y57G11C.1145_hairpin	1798.68	1774.08	0.427673	3.30965	9.88389	0.523476	18.8813	1.6263e-79	2.7698e-77
TCTCTTCAGCTGACTACACTCT	23H-RNA	rft-2, Y47D7A.14_IR, Y47D7A.14_IR_element	51.3174	94.0323	0	0	9.8807	1.61032	6.13587	8.46938e-10	1.79743e-08
CTAAGACTGTTTCTGATCACAA	23H-RNA	F43E2.13, F43E2.6, linc-169	76.9761	68.957	0	0	9.88007	1.58838	6.22023	4.96439e-10	1.07025e-08
MIMAT0015116	miRNA	miR-240-5p	328544	757662	555.974	597.805	9.87871	0.323556	30.5317	9.89973e-205	8.43024e-202
TGAAAGGATCGGGACGATTAGGA	23H-RNA	ChrX_intergenic1	25.6587	119.108	0	0	9.87718	1.69856	5.81502	6.06283e-09	1.16347e-07
TTCCTCATCTCTGATCTTTTCCA	23H-RNA	F55A4.9, rncs-1	110.332	35.5233	0	0	9.87314	1.65592	5.96234	2.48651e-09	5.06408e-08
TGGAGTGGATGACGACGACGATG	23H-RNA	Y57G11C.1145_hairpin	2907.13	15141.3	10.6918	8.68782	9.86333	1.08863	9.06034	1.30047e-19	5.27349e-18
ATCTCAGAAACATCGGCAAATGG	23H-RNA	F43E2.6	718.444	842.112	0.427673	1.24112	9.85912	0.765731	12.8754	6.1894e-38	4.28074e-36
TGCCGATGTTTCTGAGATGTCTT	23H-RNA	F43E2.6	35116.5	95118.9	58.5912	81.9138	9.85618	0.689753	14.2894	2.54668e-46	2.12874e-44
TCCTCATCTCTGATCTTTTCCAA	23H-RNA	F55A4.9, rncs-1	35.9222	106.57	0	0	9.85396	1.6539	5.958	2.55347e-09	5.19269e-08
TCCGATTTCTGCCCCCCCAAA	23H-RNA	PAL8C	610.677	940.323	0.855345	0.827412	9.85053	0.783631	12.5704	3.07244e-36	2.0126e-34
AAGACATCTCAGAAACATCGGCAA	23H-RNA	F43E2.6	41.0539	100.301	0	0	9.84188	1.63683	6.01278	1.82374e-09	3.74788e-08
ATTCTCTCGTAGAACGTGTCGCTT	23H-RNA	F55A4.9, rncs-1	84.6737	298.814	0	0.413706	9.83843	1.57084	6.26315	3.77278e-10	8.21151e-09
ATACGGCTAGCCATATAAAGACC	23H-RNA	C36A4.14	148.821	234.036	0.427673	0	9.83319	1.50925	6.5153	7.25467e-11	1.70129e-09
CATCATCCTCGCCGCAGCCATCGT	23H-RNA	Y57G11C.1145_hairpin	71.8444	68.957	0	0	9.82913	1.5926	6.17177	6.75312e-10	1.44445e-08
TGCAAATGAAATCGTGGGCGGG	23H-RNA	mir-5550_RE	33.3563	104.48	0	0	9.80621	1.66395	5.89331	3.78527e-09	7.49626e-08
AACAACGAAGCTCCGAAATAACG	23H-RNA	PALTTAA1	69.2785	68.957	0	0	9.80298	1.59507	6.14581	7.95568e-10	1.69105e-08
TGGACTTTTTCGCTGGTTTGGTG	23H-RNA	F55A4.9, rncs-1	25.6587	110.749	0	0	9.79153	1.69921	5.76241	8.29228e-09	1.56269e-07
CGGCCCTTACCGTTTAATACATG	23H-RNA	mir-5592	2488.9	4204.29	4.27673	3.30965	9.78809	0.437194	22.3884	5.1036e-111	1.36346e-108
TGGATGATGGCGTGGAAGAAGT	23H-RNA	Y57G11C.1145_hairpin	800.552	3650.54	2.13836	2.89594	9.78745	1.12067	8.73358	2.46728e-18	9.6323e-17
CTCTCGATGCTCGTCGATCCAGT	23H-RNA	F55A4.9, rncs-1	12.8294	123.287	0	0	9.78192	2.96025	3.30443	0.000951698	0.00846402
CTGTTCTGCTCTCTCTTTCAGC	23H-RNA	F55A4.9, rncs-1	189.874	547.477	0	0.827412	9.78181	1.14446	8.54708	1.26238e-17	4.76452e-16
AGTGGAGTGGATGACGACGACG	23H-RNA	Y57G11C.1145_hairpin, Y57G11C.51	145346	563874	373.358	433.15	9.78031	0.855682	11.4298	2.96647e-30	1.64972e-28
TGCTCGTCGATCCAGTTTGGCCA	23H-RNA	F55A4.9, rncs-1	30.7905	104.48	0	0	9.77927	1.67484	5.83894	5.25341e-09	1.01529e-07
TTCTACATATCCAAACGAGGAACC	23H-RNA	Y17D7C.3	53.8833	81.4947	0	0	9.77684	1.60877	6.0772	1.22296e-09	2.55173e-08
MIMAT0022192	miRNA	miR-5550-3p	97.5031	269.559	0	0.413706	9.77525	1.55184	6.29914	2.99298e-10	6.55616e-09
TTTGCCGATGTTTCTGAGATG	23H-RNA	F43E2.6	27490.7	62504.3	43.6226	59.1599	9.77368	0.344285	28.3884	2.81571e-177	1.74382e-174
AAGTATGATTGATATTGGGAAC	23H-RNA	Y59H11AR.6	64.1468	300.903	0	0.413706	9.76752	1.60011	6.1043	1.03252e-09	2.17099e-08
ATTTGCCGATGTTTCTGAGATGTC	23H-RNA	F43E2.6	1944.93	16374.2	11.9748	9.10153	9.76367	1.30792	7.46504	8.32756e-14	2.45061e-12
ACGACGATGGCTGCGGCGAGGAT	23H-RNA	Y57G11C.1145_hairpin	92.3714	271.649	0.427673	0	9.76148	1.55726	6.26837	3.64845e-10	7.95362e-09
TCTCTCTTCTCGGCTCTTCGAGC	23H-RNA	ChrIII_hairpin1	133.425	229.857	0.427673	0	9.7579	1.51715	6.43174	1.26151e-10	2.8985e-09
CTCTCGTAGAACGTGTCGCTTCG	23H-RNA	F55A4.9, rncs-1	53.8833	79.4051	0	0	9.75419	1.60976	6.05942	1.36612e-09	2.8331e-08
GACATCTCAGAAACATCGGCAAA	23H-RNA	F43E2.6	28.2246	104.48	0	0	9.75179	1.68678	5.78131	7.41226e-09	1.40072e-07
TTGCCGATGTTTCTGAGATGT	23H-RNA	F43E2.6	330.997	752.258	0.855345	0.413706	9.74761	0.933929	10.4372	1.67663e-25	8.15861e-24
CCATCGTCGTCGTCATCCACTCC	23H-RNA	Y57G11C.1145_hairpin	35.9222	96.1219	0	0	9.74398	1.65487	5.88806	3.90756e-09	7.71601e-08
ATTCGGGAATTAGTTGTCGACA	23H-RNA	T05E12.8	1749.92	2210.8	2.13836	2.48224	9.74273	0.487247	19.9955	6.03317e-89	1.12605e-86
CCGCGCGCCGCTATGTTTAACTC	23H-RNA	PALTA3	43.6198	85.6739	0	0	9.71233	1.63175	5.95211	2.64707e-09	5.37502e-08
GTGGAGCTGGACGATGGATTCTTT	23H-RNA	F55A4.9, rncs-1	0	129.556	0	0	9.70974	4.78865	2.02766	0.0425953	0.199849
ATTTGCCGATGTTTCTGAGATGT	23H-RNA	F43E2.6	8849.69	33699.1	23.0943	27.7183	9.70964	0.903997	10.7408	6.54855e-27	3.31688e-25
CTCGCCGCAGCCATCGTCGTCGT	23H-RNA	Y57G11C.1145_hairpin	66.7127	62.6882	0	0	9.7071	1.6049	6.04841	1.46282e-09	3.02902e-08
CTTTTTCAGCGGTCTCGTTATG	23H-RNA	PAL5A	15.3952	112.839	0	0	9.70244	1.76775	5.4886	4.05137e-08	6.96089e-07
TTTGCCGATGTTTCTGAGATGTC	23H-RNA	F43E2.6	951158	2.94201e+06	2015.19	2661.37	9.70127	0.763748	12.7022	5.75025e-37	3.85946e-35
CGGTGTGCTCGAGGGCTTGTCA	23H-RNA	Y37E3.30	197.572	491.058	0.427673	0.413706	9.68079	1.12811	8.58141	9.37161e-18	3.5767e-16
ACGTGTCGCTTCGTCATCTGA	23H-RNA	F55A4.9, rncs-1	38.4881	87.7635	0	0	9.67875	1.64729	5.87557	4.21386e-09	8.24912e-08
ACCTGAACTTTTTGGATCAACA	23H-RNA	T05E12.10	123.162	219.409	0	0.413706	9.67468	1.52271	6.3536	2.10328e-10	4.72891e-09
TCCCGCATTTCTTGTAGATCACA	23H-RNA	H24K24.4, trm-2A	28.2246	96.1219	0	0	9.65798	1.68795	5.72173	1.05446e-08	1.97078e-07
CGGAGTTAAATTTGAATTTTTT	23H-RNA	Y69A2AR.16_hairpin	38.4881	85.6739	0	0	9.65458	1.64773	5.85933	4.64728e-09	9.07151e-08
CATTCCTACGACATGGAGGTCCC	23H-RNA	C40A11.10, mir-8199	164.216	173.437	0	0.413706	9.64988	1.50383	6.41688	1.39099e-10	3.19061e-09
ATTGTGAAGACATCTCAGAAACA	23H-RNA	F43E2.6	531.135	817.036	0.427673	1.24112	9.6495	0.788148	12.2433	1.82567e-34	1.1463e-32
TGGAAACGTCAAGAAGTTTGATC	23H-RNA	F52G3.8	33.3563	89.8531	0	0	9.64421	1.66605	5.78866	7.09491e-09	1.34547e-07
TCCGATTTCTGCCCCCCAAAATG	23H-RNA	PAL5A	43.6198	79.4051	0	0	9.6402	1.63408	5.89947	3.64669e-09	7.23234e-08
CTAGTCAATTCTCTCGTAGAACG	23H-RNA	F55A4.9, rncs-1	41.0539	81.4947	0	0	9.63514	1.64075	5.87238	4.29582e-09	8.39749e-08
TGCTTTCCTCATCTCTGATCTTT	23H-RNA	F55A4.9, rncs-1	1696.04	2269.31	0.427673	4.55077	9.63334	1.21374	7.93689	2.07321e-15	6.99197e-14
CTGTTCTGCTCTCTCTTTCAGCTC	23H-RNA	F55A4.9, rncs-1	25.6587	96.1219	0	0	9.62808	1.70134	5.6591	1.5217e-08	2.77552e-07
TTGCTTTCCTCATCTCTGATCT	23H-RNA	F55A4.9, rncs-1	46.1857	75.2258	0	0	9.62038	1.62919	5.90499	3.52662e-09	7.01463e-08
TGTGCTGAGCTCTTGGATGATC	23H-RNA	puf-10, Y48G1BL.3	30.7905	89.8531	0	0	9.61411	1.67712	5.73251	9.89545e-09	1.85455e-07
CAGTGGAGTGGATGACGACGACGA	23H-RNA	Y57G11C.1145_hairpin	102.635	223.588	0	0.413706	9.60496	1.53942	6.23932	4.39488e-10	9.51992e-09
ATCGACACAAGCGCTACAGTAGT	23H-RNA	CELE1	76.9761	43.8817	0	0	9.60404	1.63436	5.87631	4.19506e-09	8.22412e-08
CCATCAGCACCAACACCTCACCC	23H-RNA	C36A4.14	749.234	560.015	0.427673	1.24112	9.60312	0.777822	12.3462	5.1084e-35	3.26769e-33
TCAGGCCGCCGACATCTCATG	23H-RNA	PALTA3	35.9222	83.5843	0	0	9.59969	1.65765	5.79115	6.99065e-09	1.33213e-07
TTCCGCGCGCCGCTATGTTTAACT	23H-RNA	PALTA3	20.527	98.2115	0	0	9.59182	1.7322	5.53735	3.07086e-08	5.37105e-07
TGAAGAGGCAGGGTCCGGTTGCG	23H-RNA	Y57G11C.1145_hairpin	669.692	2250.51	2.13836	1.65482	9.59178	0.665318	14.4168	4.05486e-47	3.56435e-45
TGGCGTGTACTGCAGAAAACCT	23H-RNA	PALTA3	56.4492	62.6882	0	0	9.58961	1.61828	5.92579	3.10796e-09	6.25494e-08
MIMAT0004224	miRNA	miR-789-3p	1919.27	1941.24	2.56604	2.48224	9.5792	0.45896	20.8716	9.71105e-97	2.00474e-94
MIMAT0004224_1	miRNA	miR-789-3p	1919.27	1941.24	2.56604	2.48224	9.5792	0.45896	20.8716	9.71105e-97	2.00474e-94
AGCCGTGGTCGATGCTGAAAGGT	23H-RNA	F55A4.9, rncs-1	297.641	662.405	0	1.24112	9.57722	0.940756	10.1803	2.4269e-24	1.15214e-22
CGTATATTCTCTATTAGTGCTGC	23H-RNA	Unknown_RE6	48.7516	68.957	0	0	9.57454	1.62709	5.88446	3.9935e-09	7.86293e-08
TGGCTGCGGCGAGGATGATGTG	23H-RNA	Y57G11C.1145_hairpin	23.0928	94.0323	0	0	9.57203	1.71676	5.57562	2.4665e-08	4.39295e-07
CTTCCTTGACGACATATGGCCC	23H-RNA	other	53.8833	62.6882	0	0	9.55867	1.62261	5.89091	3.84064e-09	7.59489e-08
TCATCCTCGCCGCAGCCATCGT	23H-RNA	Y57G11C.1145_hairpin	66.7127	50.1506	0	0	9.55783	1.62575	5.87902	4.12709e-09	8.11422e-08
CCGATGTTTCTGAGATGTCTTC	23H-RNA	F43E2.6	2491.46	4747.59	4.7044	4.96447	9.54848	0.425861	22.4216	2.42542e-111	6.74416e-109
TTTTGTTTCTCTTCCTCTTGCT	23H-RNA	F19B2.5	528.569	729.273	0.855345	0.827412	9.54823	0.780203	12.2381	1.94431e-34	1.2152e-32
ATCTACCTGTTGAACTTGACTCC	23H-RNA	TIR54TA1	35.9222	79.4051	0	0	9.54814	1.65923	5.75455	8.68754e-09	1.63266e-07
AATATTTATTTCGCATCCCTCCC	23H-RNA	Y57G11C.36, Y57G11C.51	84.6737	31.3441	0	0	9.54284	1.67642	5.6924	1.25268e-08	2.31585e-07
GCCGATGTTTCTGAGATGTCTTC	23H-RNA	F43E2.6	266.851	670.764	0.855345	0.413706	9.53943	0.950116	10.0403	1.01394e-23	4.73116e-22
CCGGCCCTTACCGTTTAATACA	23H-RNA	mir-5592	51.3174	62.6882	0	0	9.52705	1.62742	5.85408	4.79654e-09	9.32281e-08
CATGTATTAAACGGTAAGGGCCG	23H-RNA	mir-5592	3797.49	5547.91	9.83647	2.89594	9.52227	0.786072	12.1137	8.93282e-34	5.50722e-32
TTCCCTTTATGTCGCACTTGCGC	23H-RNA	T05E12.10	33.3563	79.4051	0	0	9.51604	1.66926	5.70074	1.19286e-08	2.21427e-07
TGAAAGAGAGAGCAGAACAGCG	23H-RNA	F55A4.9, rncs-1	30.7905	81.4947	0	0	9.51035	1.67963	5.66216	1.49476e-08	2.73003e-07
AGTGGAGTGGATGACGACGACGA	23H-RNA	Y57G11C.1145_hairpin	106242	459057	390.893	385.988	9.5071	0.898108	10.5857	3.47205e-26	1.73285e-24
ATCGTCGTCGTCATCCACTCC	23H-RNA	Y57G11C.1145_hairpin	933.977	877.635	0	2.48224	9.50561	1.60185	5.93415	2.9537e-09	5.97981e-08
CGAGGATGATGTGGATGATGGCG	23H-RNA	Y57G11C.1145_hairpin	7.69761	104.48	0	0	9.50292	3.20705	2.96314	0.00304522	0.0239556
AACTGCCGCACGGTTTCGAAACT	23H-RNA	DNA-8-1	64.1468	48.061	0	0	9.49915	1.6327	5.81807	5.953e-09	1.14562e-07
TCGTCGTCATCCACTCCACCGA	23H-RNA	Y57G11C.1145_hairpin	369.485	240.305	0.427673	0.413706	9.49858	1.09192	8.69897	3.34921e-18	1.29272e-16
ATGCTCGTCGATCCAGTTTGGCC	23H-RNA	F55A4.9, rncs-1	48.7516	62.6882	0	0	9.49471	1.63276	5.81514	6.05842e-09	1.16347e-07
TGGCCAAACTGGATTGACGAG	23H-RNA	F55A4.9, rncs-1	23.0928	87.7635	0	0	9.49273	1.71864	5.5234	3.32495e-08	5.79314e-07
CGGAGTTAAATTTGAATTTTTTA	23H-RNA	Y69A2AR.16_hairpin	33.3563	77.3154	0	0	9.48897	1.67004	5.68188	1.33222e-08	2.45291e-07
CGATGCTCGTCGATCCAGTTT	23H-RNA	F55A4.9, rncs-1	20.527	89.8531	0	0	9.48667	1.73494	5.46801	4.55117e-08	7.74154e-07
CCGCCCACAGAACTGTACCTTGC	23H-RNA	H15N14.4, H37A05.4	348.958	549.567	0	1.24112	9.48057	0.907935	10.4419	1.59566e-25	7.79242e-24
ACGATGGATTCTTTGGAGCAAC	23H-RNA	F55A4.9, rncs-1	15.3952	94.0323	0	0	9.47425	1.77409	5.34035	9.27688e-08	1.52103e-06
CTTGGACTTTTTCGCTGGTTTGG	23H-RNA	F55A4.9, rncs-1	15.3952	94.0323	0	0	9.47425	1.77409	5.34035	9.27688e-08	1.52103e-06
TCTCTCGTAGAACGTGTCGCTTC	23H-RNA	F55A4.9, rncs-1	51.3174	58.509	0	0	9.47248	1.63239	5.80284	6.52024e-09	1.24773e-07
TCACGGAGTTAAATTTGAATTTT	23H-RNA	Y69A2AR.16_hairpin	76.9761	217.319	0	0.413706	9.45715	1.56716	6.0346	1.5936e-09	3.27988e-08
TCATCTCTGATCTTTTCCAAT	23H-RNA	F55A4.9, rncs-1	43.6198	64.7778	0	0	9.45609	1.64324	5.75455	8.68745e-09	1.63266e-07
TGTGAAGACATCTCAGAAACATCG	23H-RNA	F43E2.6	56.4492	52.2402	0	0	9.4553	1.63345	5.78854	7.10012e-09	1.34547e-07
TAGATCAAACCGTCATGGGACA	23H-RNA	CELE14B	315.602	275.828	0.855345	0	9.4551	1.08035	8.75186	2.0986e-18	8.21651e-17
TGAAGACATCTCAGAAACATCG	23H-RNA	F43E2.6	708.18	1040.62	0.427673	2.06853	9.44017	0.658752	14.3304	1.41342e-46	1.19614e-44
ATGTTTCTGAGATGTCTTCACAA	23H-RNA	F43E2.6	23.0928	83.5843	0	0	9.43731	1.72025	5.486	4.11143e-08	7.05519e-07
AAGAACAAGCCGTGGGCAAGCA	23H-RNA	F39E9.7, F55A4.4	490.081	672.853	1.28302	0.413706	9.43413	0.782958	12.0493	1.95509e-33	1.19453e-31
AAAAAATATGGATAAGATGATG	23H-RNA	F55A4.9, rncs-1	20.527	85.6739	0	0	9.43105	1.73658	5.43083	5.60933e-08	9.4122e-07
TGGATGATGGCGTGGAAGAAG	23H-RNA	Y57G11C.1145_hairpin	184.743	392.846	0	0.827412	9.42951	1.1242	8.38778	4.95413e-17	1.83424e-15
CATCATCCTCGCCGCAGCCATC	23H-RNA	Y57G11C.1145_hairpin	69.2785	37.6129	0	0	9.42646	1.65834	5.68426	1.3138e-08	2.42227e-07
MIMAT0020003	miRNA	miR-4814-3p	2878.91	5779.85	5.98742	6.61929	9.42368	0.407411	23.1306	2.27763e-118	7.38875e-116
TTGCTTAACTTGCCAGATCGGAC	23H-RNA	rrn-4_RE	66.7127	39.7025	0	0	9.42068	1.65317	5.69855	1.20832e-08	2.23991e-07
TCACGGAGTTAAATTTGAATTTTT	23H-RNA	Y69A2AR.16_hairpin	5.13174	100.301	0	0	9.41335	3.44475	2.73266	0.00628247	0.0444799
ATCGTCGTCGTCATCCACTCCACC	23H-RNA	Y57G11C.1145_hairpin	23.0928	81.4947	0	0	9.40877	1.72117	5.4665	4.59005e-08	7.78822e-07
CCATTTGCCGATGTTTCTGAGA	23H-RNA	F43E2.6	100.069	183.885	0.427673	0	9.40291	1.53595	6.1219	9.24642e-10	1.95267e-08
ATGGCTGCGGCGAGGATGATGTG	23H-RNA	Y57G11C.1145_hairpin	1785.85	7334.52	7.27044	6.20559	9.40288	0.983141	9.56412	1.13158e-21	4.89455e-20
WBGene00006438	nrfl-1 exo-siRNA	C01F6.6, nrfl-1	1.50039e+06	3.01578e+06	3179.32	3493.75	9.40253	0.289858	32.4384	7.90447e-231	7.69274e-228
WBGene00003864	oma-1 exo-siRNA	C09G9.6, oma-1	45236.3	95447	97.5094	110.459	9.40178	0.310973	30.2335	8.60746e-201	6.89863e-198
TCAATAAAAACAATGGACAACTG	23H-RNA	Y59H11AR.6	30.7905	73.1362	0	0	9.39843	1.68337	5.58309	2.36281e-08	4.24714e-07
TGGACCATCCGCAACAGTGATA	23H-RNA	F57G8.14, F57G8.15, linc-59	28.2246	75.2258	0	0	9.39227	1.69486	5.54163	2.99666e-08	5.27512e-07
TTTCGAAACCGTGCGGCAGTTGC	23H-RNA	DNA-8-1	28.2246	75.2258	0	0	9.39227	1.69486	5.54163	2.99666e-08	5.27512e-07
CGTGTCGCTTCGTCATCTGATG	23H-RNA	F55A4.9, rncs-1	7.69761	96.1219	0	0	9.39136	3.15689	2.97488	0.00293105	0.0231779
TCCCGCATTTCTTGTAGATCAAA	23H-RNA	CELE14B	105.201	175.527	0	0.413706	9.38743	1.53104	6.13139	8.71129e-10	1.8459e-08
CGTTCTACGAGGGAATTGACT	23H-RNA	F55A4.9, rncs-1	64.1468	39.7025	0	0	9.38577	1.6553	5.67014	1.4268e-08	2.61292e-07
AGACATCTCAGAAACATCGGCAAA	23H-RNA	F43E2.6	35.9222	66.8674	0	0	9.3812	1.66628	5.63001	1.80198e-08	3.27797e-07
TGAGAACCCCAAATCTACGGACC	23H-RNA	TC5A	61.5809	41.7921	0	0	9.37992	1.65129	5.68036	1.34408e-08	2.4714e-07
AAATTGTCGGCCGCTGTGGAAAC	23H-RNA	ChrV_unknown_hairpin1	66.7127	211.05	0.427673	0	9.37186	1.58091	5.92815	3.06367e-09	6.17493e-08
TTTGATCTACCTGTTGAACTTG	23H-RNA	TIR54TA1	30.7905	71.0466	0	0	9.36901	1.68484	5.56078	2.68571e-08	4.76469e-07
ATGGCTGCGGCGAGGATGATG	23H-RNA	Y57G11C.1145_hairpin	164.216	388.667	0	0.827412	9.36687	1.13716	8.23705	1.7651e-16	6.31221e-15
TGCCGATGTTTCTGAGATGTCT	23H-RNA	F43E2.6	18720.6	34641.5	29.5094	51.2995	9.36598	0.326641	28.6736	8.14884e-181	5.28705e-178
ATGAAGAGGCAGGGTCCGGTTG	23H-RNA	Y57G11C.1145_hairpin	390.012	440.907	0.427673	0.827412	9.36466	0.888642	10.5382	5.76037e-26	2.86442e-24
ATGCGGTTGTTCCAAAGAATCC	23H-RNA	F55A4.9, rncs-1	53.8833	48.061	0	0	9.36249	1.64554	5.6896	1.27335e-08	2.35087e-07
ATGTATTAAACGGTAAGGGCCGG	23H-RNA	mir-5592	787.722	869.276	1.28302	1.24112	9.35961	0.637365	14.6849	8.06102e-49	7.62718e-47
TTAAACATAGCGGCGCGCGGAAC	23H-RNA	PALTA3	454.159	647.778	0.855345	0.827412	9.35756	0.786839	11.8926	1.29324e-32	7.62787e-31
TGCGACGGATCAGTGTTGCCACT	23H-RNA	T05E12.8	33.3563	66.8674	0	0	9.34522	1.6764	5.57458	2.48135e-08	4.41362e-07
TGTGGATGATGGCGTGGAAGA	23H-RNA	Y57G11C.1145_hairpin	115.464	428.369	0	0.827412	9.34404	1.18827	7.86354	3.73437e-15	1.20286e-13
CGACGACGATGGCTGCGGCGAGG	23H-RNA	Y57G11C.1145_hairpin	538.833	1638.25	1.28302	2.06853	9.34092	0.680598	13.7246	7.23467e-43	5.47625e-41
CGATGGATTCTTTGGAGCAACCG	23H-RNA	F55A4.9, rncs-1	30.7905	68.957	0	0	9.33897	1.68606	5.53894	3.04303e-08	5.32921e-07
TCTTGCTTCTGTTCCAAATATG	23H-RNA	F19B2.5	30.7905	68.957	0	0	9.33897	1.68606	5.53894	3.04303e-08	5.32921e-07
TGAAGAGGCAGGGTCCGGTTG	23H-RNA	Y57G11C.1145_hairpin	76.9761	194.333	0.427673	0	9.33794	1.56289	5.97479	2.30384e-09	4.70611e-08
CATTCCTACGACATGGAGGTCCCT	23H-RNA	C40A11.10, mir-8199	28.2246	71.0466	0	0	9.33261	1.69729	5.49854	3.82948e-08	6.60464e-07
TCCCGCATTTTTGTAGATCACA	23H-RNA	CELE14B	28.2246	71.0466	0	0	9.33261	1.69729	5.49854	3.82948e-08	6.60464e-07
TGATCTCTCTTCTCGGCTCTTCG	23H-RNA	ChrIII_hairpin1	28.2246	71.0466	0	0	9.33261	1.69729	5.49854	3.82948e-08	6.60464e-07
TTTCGGGGTACGGTATCTAAT	23H-RNA	ChrIII_hairpin2	15.3952	83.5843	0	0	9.32979	1.7795	5.24292	1.58058e-07	2.53358e-06
CATCTCAGAAACATCGGCAAATGG	23H-RNA	F43E2.6	97.5031	442.997	0.855345	0	9.32747	1.21087	7.70313	1.32771e-14	4.13015e-13
CGCATTTTTTGTAGATCAAACCG	23H-RNA	CELE14B	35.9222	62.6882	0	0	9.32089	1.66982	5.58196	2.37826e-08	4.26928e-07
WBGene00003332	pre-miRNA	C34E11.5, mir-239.1	26187.3	36444.8	52.6037	45.5077	9.31887	0.225865	41.2586	0	0
WBGene00045326	pre-miRNA	mir-789.2, T28F3.10	880.094	1527.5	2.13836	1.65482	9.31412	0.572487	16.2696	1.62277e-59	1.82729e-57
AGCATCGAGAAACTTGGACTTTT	23H-RNA	F55A4.9, rncs-1	25.6587	71.0466	0	0	9.29524	1.71134	5.43156	5.58638e-08	9.38525e-07
AGTGGAGTGGATGACGACGACGAT	23H-RNA	Y57G11C.1145_hairpin	207.836	2436.48	2.56604	1.65482	9.29216	1.5368	6.04644	1.48078e-09	3.06155e-08
CTCAAAATAATAAAACTGCGT	23H-RNA	PALTA3	110.332	152.541	0	0.413706	9.29138	1.52645	6.08694	1.15089e-09	2.40873e-08
AGCGACACGTTCTACGAGGGA	23H-RNA	F55A4.9, rncs-1	46.1857	50.1506	0	0	9.2829	1.6561	5.60529	2.07912e-08	3.75205e-07
ATCTCAGAAACATCGGCAAATG	23H-RNA	F43E2.6	3176.55	4910.58	7.27044	5.79188	9.27654	0.359168	25.8278	4.31899e-147	1.96154e-144
TTTGCCGATGTTTCTGAGATGTCT	23H-RNA	F43E2.6	22212.7	155316	130.012	156.381	9.27581	1.08452	8.55295	1.19983e-17	4.54103e-16
TGTATTAAACGGTAAGGGCCGGCT	23H-RNA	mir-5592	828.776	2538.87	2.13836	3.30965	9.26968	0.59138	15.6746	2.25464e-55	2.43805e-53
MIMAT0011450	miRNA	miR-1832b-3p	431.066	1120.03	1.71069	0.827412	9.26407	0.730252	12.6861	7.05845e-37	4.71429e-35
TTTCGTTCTTGGTGAAAAAAGTG	23H-RNA	E01G4.7	25.6587	68.957	0	0	9.26364	1.7128	5.40847	6.35649e-08	1.06006e-06
CCTCATACCGCGTATCTATTCA	23H-RNA	F47E1.18, linc-22	64.1468	31.3441	0	0	9.26298	1.68717	5.49026	4.01338e-08	6.90433e-07
ATTGGCCTACCGAACGAAAAACC	23H-RNA	Y116F11A.1	35.9222	58.509	0	0	9.2579	1.67416	5.52986	3.20485e-08	5.59821e-07
ATATTTGGAACAGAAGCAAGAG	23H-RNA	F19B2.5	48.7516	45.9713	0	0	9.25707	1.65921	5.57922	2.41602e-08	4.32567e-07
TTGGCCAAACTGGATTGACGAGC	23H-RNA	F55A4.9, rncs-1	23.0928	71.0466	0	0	9.25682	1.72714	5.35961	8.34018e-08	1.37906e-06
CTGAGGATTTTGAGTGAGGCTCA	23H-RNA	M4.2, puf-4	10.2635	83.5843	0	0	9.25305	1.83706	5.03688	4.73173e-07	7.23567e-06
AAATTCAAATTTAACTCCGTGAC	23H-RNA	Y69A2AR.16_hairpin	33.3563	60.5986	0	0	9.25143	1.68199	5.5003	3.79145e-08	6.56398e-07
TGCAAATGAAATCGTGGGAGGGG	23H-RNA	Unknown_RE7	20.527	73.1362	0	0	9.24986	1.74351	5.30531	1.12482e-07	1.82666e-06
MIMAT0022306	miRNA	miR-5592-3p	10730.5	15588.5	18.8176	24.4086	9.24879	0.26548	34.838	6.47535e-266	1.10283e-262
MIMAT0022306_1	miRNA	miR-5592-3p	10730.5	15588.5	18.8176	24.4086	9.24879	0.26548	34.838	6.47535e-266	1.10283e-262
TCTTGCTTCTGTTCCAAATATGC	23H-RNA	F19B2.5	102.635	152.541	0.427673	0	9.24769	1.53148	6.03842	1.55635e-09	3.21291e-08
ACTTCTTCCACGCCATCATCCAC	23H-RNA	Y57G11C.1145_hairpin	30.7905	62.6882	0	0	9.24485	1.69109	5.4668	4.5822e-08	7.7846e-07
ATGGCAGCCGATGTGAATGAAGA	23H-RNA	T05E12.8	38.4881	54.3298	0	0	9.23181	1.67053	5.52629	3.27069e-08	5.70592e-07
TAGAACGTGTCGCTTCGTCATCTG	23H-RNA	F55A4.9, rncs-1	25.6587	66.8674	0	0	9.23133	1.71441	5.38455	7.26267e-08	1.20823e-06
TATCGCACTCTTTGCCCTTCCGC	23H-RNA	jmjc-1, T28F2.4	51.3174	41.7921	0	0	9.23078	1.66504	5.54387	2.95859e-08	5.23516e-07
TGTGGATGATGGCGTGGAAGAAG	23H-RNA	Y57G11C.1145_hairpin	141.123	863.008	0.855345	0.827412	9.22361	0.967374	9.53468	1.50343e-21	6.48233e-20
TGGTGGAGCTGGACGATGGATT	23H-RNA	F55A4.9, rncs-1	33.3563	58.509	0	0	9.21873	1.68425	5.47348	4.41281e-08	7.53134e-07
TCGTTGATTTAAGTAGATTTATG	23H-RNA	Y71F9AL.1_hairpin	20.527	71.0466	0	0	9.2173	1.74504	5.282	1.27784e-07	2.06777e-06
AGAGTGACAGACATCCGGGACC	23H-RNA	Unknown_RE2	30.7905	60.5986	0	0	9.21203	1.69329	5.4403	5.31898e-08	8.9692e-07
GGGGTATATATGGGTTCTAAGATC	23H-RNA	Y116F11A.1	23.0928	223.588	0.427673	0	9.19934	1.69958	5.41273	6.20725e-08	1.03644e-06
ATCTCTGATCTTTTCCAATTCTT	23H-RNA	F55A4.9, rncs-1	38.4881	52.2402	0	0	9.1986	1.67367	5.49607	3.88358e-08	6.68948e-07
TTTCCTCATCTCTGATCTTTTCCA	23H-RNA	F55A4.9, rncs-1	82.1079	162.989	0	0.413706	9.19273	1.55218	5.92245	3.17171e-09	6.36444e-08
MIMAT0032785	miRNA	miR-8186-5p	35.9222	54.3298	0	0	9.19199	1.67941	5.47333	4.41654e-08	7.53134e-07
MIMAT0032785_1	miRNA	miR-8186-5p	35.9222	54.3298	0	0	9.19199	1.67941	5.47333	4.41654e-08	7.53134e-07
TAGAAGCCGCCGGGATGGACACC	23H-RNA	E01G4.5	84.6737	158.81	0.427673	0	9.18128	1.5483	5.92992	3.03089e-09	6.12699e-08
CCAAACTGGATTGACGAGCAT	23H-RNA	F55A4.9, rncs-1	28.2246	60.5986	0	0	9.1715	1.70588	5.37642	7.59822e-08	1.25944e-06
CTTCTTCCACGCCATCATCCACA	23H-RNA	Y57G11C.1145_hairpin	38.4881	50.1506	0	0	9.1646	1.67715	5.46438	4.64536e-08	7.87228e-07
AGTTCAAGTCTCTCGATGCTCG	23H-RNA	F55A4.9, rncs-1	25.6587	62.6882	0	0	9.16442	1.71805	5.33419	9.59738e-08	1.56792e-06
CTCTCTCTTTCAGCTCAATGCC	23H-RNA	F55A4.9, rncs-1	25.6587	62.6882	0	0	9.16442	1.71805	5.33419	9.59738e-08	1.56792e-06
TTTGGCCAAGCGGACTGGAGC	23H-RNA	F55A4.9, rncs-1	35.9222	52.2402	0	0	9.15785	1.68257	5.44277	5.24575e-08	8.85667e-07
CCACGGCGGCCGACAATTTCCG	23H-RNA	Unknown_hairpin_RE2	61.5809	27.1649	0	0	9.15665	1.71067	5.35265	8.66736e-08	1.42797e-06
ATTTGCCGATGTTTCTGAGATG	23H-RNA	F43E2.6	3381.82	7384.67	8.98113	9.92894	9.15308	0.391309	23.3909	5.28837e-121	1.89616e-118
TGAAGACATCTCAGAAACATCGG	23H-RNA	F43E2.6	1372.74	2691.41	2.99371	4.13706	9.15306	0.47608	19.2259	2.24769e-82	4.08331e-80
TTTTGTTTCTCTTCCTCTTGCTTC	23H-RNA	F19B2.5	187.309	526.581	0	1.24112	9.15133	0.982883	9.31071	1.26986e-20	5.25892e-19
AACGTGTCGCTTCGTCATCTGA	23H-RNA	F55A4.9, rncs-1	20.527	66.8674	0	0	9.14985	1.74852	5.23292	1.66857e-07	2.66835e-06
CTCGTCGATCCAGTTTGGCCAA	23H-RNA	F55A4.9, rncs-1	20.527	66.8674	0	0	9.14985	1.74852	5.23292	1.66857e-07	2.66835e-06
CTCTTACTGTAGTTTTCGCTAAG	23H-RNA	PALTA4	1146.94	2887.84	2.13836	4.96447	9.14749	0.879679	10.3987	2.51438e-25	1.21484e-23
AGAGGTCCAAGTAAGATGATAGC	23H-RNA	F39E9.7	184.743	528.67	0.855345	0.413706	9.14549	0.976929	9.36146	7.8642e-21	3.29691e-19
CGACGACGAACGATCGGGATG	23H-RNA	ChrX_intergenic1	15.3952	71.0466	0	0	9.13467	1.78905	5.10588	3.29261e-07	5.12122e-06
TAAAGTCGATGGACGGCGAGATT	23H-RNA	PALTTAA1	15.3952	71.0466	0	0	9.13467	1.78905	5.10588	3.29261e-07	5.12122e-06
AAAGTTGATGGACGGCGAGATT	23H-RNA	PALTTAA1	25.6587	60.5986	0	0	9.12975	1.72031	5.30705	1.11414e-07	1.81147e-06
TTGCCGATGTTTCTGAGATGTCTT	23H-RNA	F43E2.6	84.6737	384.488	0.855345	0	9.12345	1.21993	7.47865	7.50919e-14	2.21456e-12
MIMAT0011425	miRNA	miR-2207-5p	87.2396	146.272	0	0.413706	9.12206	1.54497	5.90436	3.54021e-09	7.0314e-08
AAGTGCCACCGTGTCTGGTCTCC	23H-RNA	ZK402.3	48.7516	37.6129	0	0	9.12175	1.68242	5.4218	5.9002e-08	9.87595e-07
TTCCTCATCTCTGATCTTTTCC	23H-RNA	F55A4.9, rncs-1	10.2635	75.2258	0	0	9.11883	1.84515	4.94204	7.73076e-07	1.14615e-05
TTAGAGAGTGACAGACATCCGGG	23H-RNA	Unknown_RE2	20.527	64.7778	0	0	9.11489	1.75049	5.20703	1.91884e-07	3.05066e-06
CATCATCCTCGCCGCAGCCAT	23H-RNA	Y57G11C.1145_hairpin	17.9611	66.8674	0	0	9.10722	1.76927	5.14743	2.64076e-07	4.15477e-06
TCTCAGAAACATCGGCAAATG	23H-RNA	F43E2.6	135.991	325.979	0.855345	0	9.10284	1.14729	7.93422	2.11825e-15	7.12621e-14
AACTGCCGCACGGTTTTGAAACT	23H-RNA	DNA-8-1	28.2246	56.4194	0	0	9.10157	1.71085	5.31991	1.03818e-07	1.692e-06
ACTTTTTCAGCGGTCTCGTTATG	23H-RNA	PAL5A	28.2246	56.4194	0	0	9.10157	1.71085	5.31991	1.03818e-07	1.692e-06
TGTAATTCTGCAGCCACTTCCGA	23H-RNA	W03D2.15	53.8833	31.3441	0	0	9.1001	1.69874	5.35696	8.46331e-08	1.39773e-06
ATTAAACGGTAAGGGCCGGCT	23H-RNA	mir-5592	171.913	288.366	0.855345	0	9.09755	1.1142	8.16508	3.21224e-16	1.13092e-14
ACTGCCGCACGGTTTTGAAAC	23H-RNA	DNA-8-1	25.6587	58.509	0	0	9.09421	1.72269	5.27908	1.29834e-07	2.09348e-06
AGTGGTTCGTGGCTTCCAAATCC	23H-RNA	T05E12.8	107.767	121.197	0	0.413706	9.09031	1.53143	5.93581	2.92393e-09	5.92835e-08
GGGCATCGAGCTGAAAGAGAGAGC	23H-RNA	F55A4.9, rncs-1	2.56587	81.4947	0	0	9.08656	3.77703	2.40574	0.0161397	0.095735
WBGene00194830	pre-miRNA	C31B8.17, mir-2219	223.231	683.301	0	1.65482	9.08147	0.893723	10.1614	2.94816e-24	1.39475e-22
MIMAT0032823	miRNA	miR-8204-5p	107.767	119.108	0	0.413706	9.07691	1.53195	5.92505	3.12194e-09	6.27381e-08
TTTTGAAAGTTCTACCGTTCTC	23H-RNA	F34D6.11, linc-12	43.6198	39.7025	0	0	9.07169	1.68683	5.37796	7.53349e-08	1.25175e-06
AAAAGAAGACTGATCTCGGGCG	23H-RNA	Y65A5A.26, Y65A5A.t3, Y7A9D.66, Y7A9D.t3	17.9611	64.7778	0	0	9.07122	1.77142	5.12088	3.04114e-07	4.75179e-06
GGTGAGACATGGTATCGAGATATG	23H-RNA	Y37E11B.2	7.69761	219.409	0.427673	0	9.06874	2.65037	3.42169	0.000622337	0.00574871
TGTATTAAACGGTAAGGGCCGG	23H-RNA	mir-5592	8205.66	11599.4	20.5283	16.5482	9.0627	0.265862	34.088	1.11001e-254	1.68043e-251
CGCGCCGCTATGTTTAACTCGC	23H-RNA	PALTA3	12.8294	68.957	0	0	9.05506	1.81907	4.97785	6.42949e-07	9.62657e-06
TATTTTTTGGCACCGCTGTTCTG	23H-RNA	F55A4.9, rncs-1	128.294	317.62	0.427673	0.413706	9.0548	1.14909	7.87995	3.2752e-15	1.06249e-13
CATGAGATGTCGGCGGCCTGATA	23H-RNA	PALTA3	23.0928	58.509	0	0	9.0501	1.73887	5.20459	1.94423e-07	3.08383e-06
AAGGCGCGCTCGAAGAGCCGAGA	23H-RNA	ChrIII_hairpin1	372.051	507.774	0.427673	1.24112	9.03388	0.793039	11.3915	4.61122e-30	2.54364e-28
CCGCGCGCCGCTATGTTTAACT	23H-RNA	PALTA3	271.982	386.577	0	1.24112	9.03238	0.913684	9.88567	4.80361e-23	2.18164e-21
CAATGGAGCGGTGTAAACTTTT	23H-RNA	E01G4.7	89.8055	129.556	0	0.413706	9.03086	1.54246	5.85482	4.77518e-09	9.30233e-08
ATTAAACGGTAAGGGCCGGCTGG	23H-RNA	mir-5592	1113.59	2426.03	5.13207	1.65482	9.03026	0.894525	10.095	5.81125e-24	2.73733e-22
TAAAACTGCGTGGCGTGTACTGC	23H-RNA	PALTA3	133.425	302.993	0	0.827412	9.02622	1.14658	7.8723	3.48175e-15	1.12414e-13
TGTTTCTGAGATGTCTTCACA	23H-RNA	F43E2.6	25.6587	54.3298	0	0	9.02035	1.72801	5.22008	1.78843e-07	2.84666e-06
ATGTATTAAACGGTAAGGGCC	23H-RNA	mir-5592	2198.95	2601.56	5.55974	3.72335	9.01888	0.368022	24.5064	1.26368e-132	5.21746e-130
CTACAACGTGGAGCTAAGACACCC	23H-RNA	F55C9.3	92.3714	125.376	0.427673	0	9.01815	1.54033	5.85468	4.77918e-09	9.30233e-08
TTTCCTCATCTCTGATCTTTTCC	23H-RNA	F55A4.9, rncs-1	274.548	589.269	0	1.65482	9.01077	0.846947	10.6391	1.95967e-26	9.81637e-25
TCCCGCATTTTTCGTAGATCAAA	23H-RNA	CELE14B	17.9611	60.5986	0	0	8.99638	1.77629	5.06471	4.09018e-07	6.28992e-06
TGAAGACATCTCAGAAACATCGGC	23H-RNA	F43E2.6	17.9611	60.5986	0	0	8.99638	1.77629	5.06471	4.09018e-07	6.28992e-06
MIMAT0000299	miRNA	miR-243-3p	57860.4	167052	200.578	240.777	8.99318	0.707381	12.7134	4.98517e-37	3.36252e-35
ATTCCACTTGGGGTAAATTCGCC	23H-RNA	C36A4.14	261.719	378.219	0.855345	0.413706	8.98844	0.912243	9.85311	6.64526e-23	3.00803e-21
TGATGCGGTTGTTCCAAAGAATCC	23H-RNA	F55A4.9, rncs-1	41.0539	171.348	0.427673	0	8.98523	1.62907	5.51556	3.47674e-08	6.04988e-07
CATCGTCCGATTGGTGAAACCA	23H-RNA	Y17D7C.3	38.4881	39.7025	0	0	8.98129	1.70115	5.27954	1.29506e-07	2.09314e-06
CTCCTCGGTCTTGACGAAATCCCA	23H-RNA	C36A4.14	12.8294	64.7778	0	0	8.97949	1.82417	4.92251	8.54399e-07	1.25715e-05
TCAGAAACATCGGCAAATGGC	23H-RNA	F43E2.6	23.0928	54.3298	0	0	8.97394	1.74466	5.14366	2.69434e-07	4.2293e-06
ATGTATTAAACGGTAAGGGCCG	23H-RNA	mir-5592	595.282	666.585	1.71069	0.827412	8.96605	0.646801	13.8621	1.0743e-43	8.46087e-42
CCAAGCGGACTGGAGCACATTGGA	23H-RNA	F55A4.9, rncs-1	30.7905	45.9713	0	0	8.95833	1.71535	5.22246	1.76565e-07	2.81368e-06
CTATTTTGATAAGTCACTGACAC	23H-RNA	F39E9.29_region	17.9611	58.509	0	0	8.95743	1.77905	5.03495	4.77986e-07	7.29607e-06
TCCGCGCGTCGCTATGTTTAACT	23H-RNA	PALTA3	15.3952	60.5986	0	0	8.94889	1.801	4.96883	6.73569e-07	1.00519e-05
ATGAAGAGGCAGGGTCCGGTTGCG	23H-RNA	Y57G11C.1145_hairpin	10.2635	198.513	0.427673	0	8.94843	2.51705	3.55513	0.000377799	0.00368962
AGTGGATGACGACGACGATGGCT	23H-RNA	Y57G11C.1145_hairpin	123.162	491.058	0	1.24112	8.93577	1.03859	8.60374	7.71568e-18	2.95298e-16
AGCAAGAGGAAGAGAAACAAAAG	23H-RNA	F19B2.5	10.2635	64.7778	0	0	8.93118	1.85854	4.80549	1.5437e-06	2.20934e-05
AAGAAGAAGCATCACGTCGTTT	23H-RNA	Y17D7C.3	43.6198	31.3441	0	0	8.91681	1.71786	5.19065	2.09557e-07	3.31232e-06
TACAACGTGGAGCTAAGACACC	23H-RNA	F55C9.3	153.952	250.753	0	0.827412	8.91609	1.12107	7.95316	1.81807e-15	6.162e-14
AGCCGTGGTCGATGCTGAAAG	23H-RNA	F55A4.9, rncs-1	66.7127	133.735	0	0.413706	8.90306	1.56974	5.67168	1.41407e-08	2.59309e-07
TGGATGATGGCGTGGAAGAAGTTG	23H-RNA	Y57G11C.1145_hairpin	97.5031	2302.75	3.42138	1.65482	8.88622	1.78361	4.98216	6.2877e-07	9.45585e-06
CCGGCCCTTACCGTTTAATAC	23H-RNA	mir-5592	20.527	52.2402	0	0	8.88493	1.76701	5.02823	4.9504e-07	7.52781e-06
AGCGGTCTCGTTATGAAAATCAG	23H-RNA	PAL5A	7.69761	64.7778	0	0	8.88107	1.90111	4.67151	2.98998e-06	4.10591e-05
CGCGGGTGATGACAGAAACGGG	23H-RNA	dnj-27_element	28.2246	169.258	0.427673	0	8.87988	1.67263	5.30893	1.10273e-07	1.79506e-06
CGACGACGATGGCTGCGGCGAG	23H-RNA	Y57G11C.1145_hairpin	30.7905	41.7921	0	0	8.87668	1.72525	5.14517	2.67285e-07	4.20041e-06
WBGene00219219	pre-miRNA	mir-5546, Y71F9AL.22	61.5809	133.735	0.427673	0	8.86396	1.57781	5.6179	1.93297e-08	3.51156e-07
TGACATGGAGATTAGATAACA	23H-RNA	Y37E11B.2	151.386	238.215	0.427673	0.413706	8.85908	1.11728	7.92918	2.20601e-15	7.40318e-14
AAAATGGACGACGTGCTCGACAG	23H-RNA	C14B1.7	23.0928	48.061	0	0	8.85147	1.75537	5.0425	4.59481e-07	7.03418e-06
CGTGAGATGTCGGCGGCCTGATA	23H-RNA	PALTA3	10.2635	60.5986	0	0	8.84866	1.8653	4.74382	2.09721e-06	2.94279e-05
TACGGGAAAAGCAGAGAGGCCA	23H-RNA	F39E9.7	433.632	534.939	1.71069	0.413706	8.84749	0.713991	12.3916	2.90253e-35	1.86542e-33
TGACGACGACGATGGCTGCGGC	23H-RNA	Y57G11C.1145_hairpin	30.7905	39.7025	0	0	8.83405	1.73106	5.10325	3.33862e-07	5.18507e-06
AAGTATGATTGATATTGGGAACA	23H-RNA	Y59H11AR.6	59.015	131.645	0.427673	0	8.82926	1.5822	5.58035	2.40031e-08	4.30319e-07
TATTTGGAACAGAAGCAAGAGG	23H-RNA	F19B2.5	28.2246	41.7921	0	0	8.82557	1.7382	5.07741	3.8261e-07	5.90381e-06
AAAACCACGAATCCTAACCACT	23H-RNA	tRNA	12.8294	56.4194	0	0	8.81519	1.83714	4.79833	1.59997e-06	2.27591e-05
CCGATTTCTGCCCCCCCAAAAT	23H-RNA	PAL8C	12.8294	56.4194	0	0	8.81519	1.83714	4.79833	1.59997e-06	2.27591e-05
WBGene00077720	pre-miRNA	mir-1833, Y41E3.214	23.0928	45.9713	0	0	8.80818	1.75995	5.00479	5.5923e-07	8.44734e-06
TAGCGAAAACTACAGTAATTCTT	23H-RNA	CELE1	35.9222	33.4337	0	0	8.80723	1.73161	5.08615	3.65404e-07	5.65753e-06
ACAACCCTGAACCAGACGTACC	23H-RNA	F31C3.11, rrn-2.1, rrn-2.1_element	41.0539	27.1649	0	0	8.78001	1.74581	5.02917	4.92595e-07	7.49901e-06
TCTCCTCGTCGAAATCAAAAGG	23H-RNA	Y105C5A.14	25.6587	41.7921	0	0	8.77255	1.75303	5.00421	5.60908e-07	8.46332e-06
TCTTAGAACCCATATATACCCCCT	23H-RNA	Y116F11A.1	38.4881	29.2545	0	0	8.77121	1.7421	5.03486	4.78194e-07	7.29607e-06
MIMAT0011449	miRNA	miR-1832b-5p	282.246	267.47	0	1.24112	8.76861	0.910767	9.62772	6.10699e-22	2.6584e-20
ATTAAACGGTAAGGGCCGGCTG	23H-RNA	mir-5592	1105.89	1782.43	4.27673	2.48224	8.74543	0.461507	18.9497	4.43857e-80	7.75328e-78
TTAAACATAGCGGCGCGCGGAA	23H-RNA	PALTA3	15.3952	50.1506	0	0	8.73528	1.81906	4.80207	1.57031e-06	2.24271e-05
ATGATGTGGATGATGGCGTGGA	23H-RNA	Y57G11C.1145_hairpin	53.8833	123.287	0.427673	0	8.72353	1.59157	5.48109	4.22704e-08	7.23535e-07
TTGCCGATGTTTCTGAGATGTC	23H-RNA	F43E2.6	951.938	2417.67	3.84905	4.13706	8.72157	0.509419	17.1206	1.04119e-65	1.37731e-63
TCTCTCGATGCTCGTCGATCCAG	23H-RNA	F55A4.9, rncs-1	48.7516	127.466	0	0.413706	8.71855	1.60373	5.43642	5.43605e-08	9.15528e-07
TACAACGTGCAACTAAGACACCC	23H-RNA	Y37E3.30	20.527	43.8817	0	0	8.70801	1.78441	4.88005	1.06061e-06	1.54554e-05
GGTGAGGTGTTGGTGCTGATGGCA	23H-RNA	C36A4.14	12.8294	338.516	0.427673	0.413706	8.70715	2.08911	4.16788	3.07451e-05	0.000361746
AACTTAAAACCAACAATGAACA	23H-RNA	Y36E3A.2	43.6198	20.8961	0	0	8.6969	1.78196	4.88051	1.05812e-06	1.54357e-05
CCCGCCCACAGTTCTGTACCTTG	23H-RNA	Y24F12A.3, Y24F12A.4	28.2246	35.5233	0	0	8.6887	1.75791	4.94262	7.70782e-07	1.144e-05
TAAATCTACTTAAATCAACGAAT	23H-RNA	mek-2, Y54E10BL.6, Y71F9AL.1	28.2246	35.5233	0	0	8.6887	1.75791	4.94262	7.70782e-07	1.144e-05
TTGCCGATGTTTCTGAGATGTCT	23H-RNA	F43E2.6	2234.87	5790.3	13.6855	5.79188	8.68777	0.871825	9.96504	2.16785e-23	1.00125e-21
CAAACTGGATTGACGAGCATCGAG	23H-RNA	F55A4.9, rncs-1	15.3952	156.721	0.427673	0	8.681	1.74138	4.98512	6.19228e-07	9.33294e-06
AATCGGAAACTCAAAGACCACAC	23H-RNA	Y17D7C.3	1280.37	1468.99	3.84905	2.89594	8.67468	0.420979	20.6059	2.42767e-94	4.79377e-92
TGATGTGGATGATGGCGTGGAAG	23H-RNA	Y57G11C.1145_hairpin	30.7905	140.004	0.427673	0	8.67115	1.65964	5.22472	1.74419e-07	2.78274e-06
TGATCTACCTGTTGAACTTGACT	23H-RNA	TIR54TA1	48.7516	14.6272	0	0	8.66887	1.83129	4.73376	2.20398e-06	3.08625e-05
TTTTGATCTACCTGTTGAACTTG	23H-RNA	TIR54TA1	20.527	41.7921	0	0	8.66012	1.79005	4.83792	1.31202e-06	1.89167e-05
CGGGAGGAAAGCTGGGATTATCC	23H-RNA	Y37E3.30	218.099	785.692	0	2.48224	8.65591	2.0027	4.32211	1.54543e-05	0.000190212
TGCCGATGTTTCTGAGATGTC	23H-RNA	F43E2.6	718.444	1310.18	2.13836	2.89594	8.65359	0.531144	16.2924	1.11844e-59	1.26989e-57
MIMAT0032786	miRNA	miR-8186-3p	76.9761	91.9427	0	0.413706	8.65236	1.56149	5.5411	3.00585e-08	5.27767e-07
MIMAT0032786_1	miRNA	miR-8186-3p	76.9761	91.9427	0	0.413706	8.65236	1.56149	5.5411	3.00585e-08	5.27767e-07
TCTGAGATGTCTTCACAATTCTC	23H-RNA	F43E2.6	30.7905	31.3441	0	0	8.64955	1.76208	4.90873	9.16697e-07	1.34446e-05
ATCCACGACGGCCGACAATTTCC	23H-RNA	Unknown_hairpin_RE2	5.13174	56.4194	0	0	8.64578	1.97784	4.37132	1.23495e-05	0.000154795
TGCGGCGAGGATGATGTGGATGA	23H-RNA	Y57G11C.1145_hairpin	15.3952	45.9713	0	0	8.63999	1.82874	4.72456	2.30618e-06	3.21614e-05
CTATCTACACTCTCTGTACCGG	23H-RNA	Unknown_RE2	220.665	280.007	0.855345	0.413706	8.63369	0.917878	9.40613	5.14722e-21	2.18476e-19
TCAATAAAAACAATGGACAACT	23H-RNA	Y59H11AR.6	64.1468	102.391	0.427673	0	8.63252	1.57379	5.48518	4.13038e-08	7.0788e-07
ACTGCCGCACGGTTTCGAAACT	23H-RNA	DNA-8-1	25.6587	35.5233	0	0	8.63036	1.77307	4.86747	1.13037e-06	1.64017e-05
CCACCGTGTCTGGTCTCCTCGCC	23H-RNA	ZK402.3	10.2635	50.1506	0	0	8.61875	1.88768	4.56578	4.97636e-06	6.60389e-05
TGGGAATGCAGAAGAAAAGAGGG	23H-RNA	other	10.2635	50.1506	0	0	8.61875	1.88768	4.56578	4.97636e-06	6.60389e-05
TTCGGCAATGGGGTACCCTACG	23H-RNA	Y37E3.30	87.2396	77.3154	0	0.413706	8.61147	1.56328	5.50857	3.61757e-08	6.2789e-07
TTGGAATCCGCTTAACAATTGG	23H-RNA	Y105C5A.1272, Y105C5A.14	20.527	39.7025	0	0	8.61056	1.79633	4.79341	1.63968e-06	2.32715e-05
MIMAT0032797	miRNA	miR-8192-5p	7.69761	52.2402	0	0	8.60763	1.92884	4.46258	8.09778e-06	0.00010396
CCATCGGACGAGCTCTTATCCCCT	23H-RNA	T05E12.8	17.9611	41.7921	0	0	8.60034	1.81334	4.74281	2.10772e-06	2.95449e-05
TCATCTCTGATCTTTTCCAATTC	23H-RNA	F55A4.9, rncs-1	130.859	192.244	0	0.827412	8.59101	1.13067	7.59816	3.00379e-14	9.11506e-13
CGCCAAACATGGATCAACTGGA	23H-RNA	ZK402.2, ZK402.3, ZK402.5	28.2246	31.3441	0	0	8.58961	1.77535	4.83825	1.30988e-06	1.89058e-05
TTGGCCAAGCGGACTGGAGCACA	23H-RNA	F55A4.9, rncs-1	28.2246	31.3441	0	0	8.58961	1.77535	4.83825	1.30988e-06	1.89058e-05
WBGene00255567	pre-miRNA	F07A11.16, mir-8212	87.2396	231.946	0.855345	0	8.56958	1.18536	7.22951	4.84738e-13	1.33156e-11
TGGGCGGGGCCAATCCGGAATGC	23H-RNA	Y24F12A.3, Y24F12A.4	23.0928	35.5233	0	0	8.56953	1.79068	4.78562	1.70461e-06	2.41427e-05
TGTTCTGCTCTCTCTTTCAGC	23H-RNA	F55A4.9, rncs-1	23.0928	35.5233	0	0	8.56953	1.79068	4.78562	1.70461e-06	2.41427e-05
AAGAACAAGCCGTGGGCAAGC	23H-RNA	F39E9.7, F55A4.4	395.144	403.294	0.855345	1.24112	8.56928	0.714839	11.9877	4.12201e-33	2.49611e-31
ACGACGATGGCTGCGGCGAGGA	23H-RNA	Y57G11C.1145_hairpin	97.5031	62.6882	0.427673	0	8.56771	1.57672	5.43388	5.51431e-08	9.27561e-07
ATAACGAGACCGCTGAAAAAGTT	23H-RNA	PAL5A	82.1079	77.3154	0	0.413706	8.56642	1.56621	5.46953	4.51223e-08	7.68489e-07
TTCATTCTGCCCTCGCACACACC	23H-RNA	T25G12.8	69.2785	89.8531	0.427673	0	8.56517	1.57	5.45551	4.88322e-08	8.25483e-07
CCGTCTAGGTGATCTTTCAACAC	23H-RNA	Y37E3.30	187.309	288.366	0.855345	0.413706	8.56091	0.933538	9.17038	4.71333e-20	1.92273e-18
CAATGTATGGAGGACGAACACA	23H-RNA	C36A4.14	20.527	37.6129	0	0	8.55922	1.80335	4.74629	2.07186e-06	2.91322e-05
CCCTTACGATCCTTCTTATCTGA	23H-RNA	Unknown_IR1	20.527	37.6129	0	0	8.55922	1.80335	4.74629	2.07186e-06	2.91322e-05
TATCGCACTCTTTGCCCTTCCG	23H-RNA	jmjc-1, T28F2.4	261.719	369.86	0	1.65482	8.55766	0.818071	10.4608	1.30775e-25	6.40939e-24
WBGene00194802	pre-miRNA	mir-1832.2, Y116A8C.464	51.3174	6.26882	0	0	8.52918	1.9663	4.33768	1.43994e-05	0.000177549
ATGAAGAGGCAGGGTCCGGTTGC	23H-RNA	Y57G11C.1145_hairpin	1875.65	4680.72	12.4025	5.37818	8.52779	0.846784	10.0708	7.43691e-24	3.48206e-22
AAGCGACACGTTCTACGAGGGA	23H-RNA	F55A4.9, rncs-1	25.6587	31.3441	0	0	8.52706	1.79078	4.76163	1.92032e-06	2.71133e-05
CGTGGAAGAAGTTGATGAAGAGG	23H-RNA	Y57G11C.1145_hairpin	12.8294	43.8817	0	0	8.52678	1.867	4.56711	4.94492e-06	6.57954e-05
GACATCTCAGAAACATCGGCA	23H-RNA	F43E2.6	12.8294	43.8817	0	0	8.52678	1.867	4.56711	4.94492e-06	6.57954e-05
ACCGAGCTCACAATGATATTGC	23H-RNA	F52G3.8	10.2635	45.9713	0	0	8.51533	1.89964	4.4826	7.37398e-06	9.52327e-05
TCCACGGCGGCCGACAATTTCC	23H-RNA	Unknown_hairpin_RE2	10.2635	45.9713	0	0	8.51533	1.89964	4.4826	7.37398e-06	9.52327e-05
CACGGCAACTCGGTCCAAAACC	23H-RNA	PALNN1	35.9222	20.8961	0	0	8.51503	1.80609	4.71462	2.42163e-06	3.35995e-05
TCTCTCGTAGAACGTGTCGCTTCG	23H-RNA	F55A4.9, rncs-1	12.8294	140.004	0.427673	0	8.50979	1.76285	4.8273	1.384e-06	1.99333e-05
ATGGCTGCGGCGAGGATGATGT	23H-RNA	Y57G11C.1145_hairpin	87.2396	217.319	0	0.827412	8.50879	1.18369	7.18838	6.55657e-13	1.7831e-11
CTCGGCATTCAGAGGCAACTTCT	23H-RNA	npr-34, Y54E2A.1	33.3563	22.9857	0	0	8.50441	1.80001	4.72465	2.30511e-06	3.21614e-05
GCCCTTACCGTTTAATACATGTT	23H-RNA	mir-5592	33.3563	22.9857	0	0	8.50441	1.80001	4.72465	2.30511e-06	3.21614e-05
CCAAGCGGACTGGAGCACATTGG	23H-RNA	F55A4.9, rncs-1	120.596	336.427	0.855345	0.413706	8.50391	0.99925	8.51028	1.73508e-17	6.47682e-16
CACGGAGTTAAATTTGAATTTTT	23H-RNA	Y69A2AR.16_hairpin	256.587	499.416	0.427673	1.65482	8.49556	0.771096	11.0175	3.14665e-28	1.63638e-26
TGGATAAGATGATGAAACTAGTC	23H-RNA	F55A4.9, rncs-1	41.0539	108.66	0.427673	0	8.48115	1.62264	5.22676	1.72503e-07	2.7554e-06
TAAAAAATTCAAATTTAACTCCG	23H-RNA	Y69A2AR.16_hairpin	66.7127	231.946	0.855345	0	8.47319	1.22305	6.92792	4.27083e-12	1.0938e-10
CGACGTGTTCCAGCATTCTTCGAC	23H-RNA	Y37E3.30	92.3714	204.781	0	0.827412	8.47291	1.17327	7.2216	5.13812e-13	1.40859e-11
CGGCGAGGATGATGTGGATGATG	23H-RNA	Y57G11C.1145_hairpin	12.8294	41.7921	0	0	8.47249	1.87356	4.52214	6.12188e-06	8.05899e-05
CCCGCCCACAGAACTGTGCCTTG	23H-RNA	H15N14.4, H37A05.4, Y24F12A.3, Y24F12A.4	25.6587	29.2545	0	0	8.47248	1.80137	4.70334	2.55937e-06	3.53665e-05
AATCGGAAACTCAAAGACCACA	23H-RNA	Y17D7C.3	5067.6	7716.92	12.4025	23.9949	8.45367	0.314714	26.8614	6.19998e-159	3.12869e-156
CGATGTTTCTGAGATGTCTTCA	23H-RNA	F43E2.6	33.3563	20.8961	0	0	8.449	1.8168	4.6505	3.31136e-06	4.51625e-05
AGTGGAGTGGATGACGACGAC	23H-RNA	Y57G11C.1145_hairpin, Y57G11C.51	1282.94	4120.7	6.84276	8.68782	8.44246	0.85244	9.90388	4.0044e-23	1.83704e-21
AAGAACAAGCCGTGGGCAAGCAC	23H-RNA	F39E9.7, F55A4.4	5.13174	48.061	0	0	8.43575	2.00528	4.20678	2.59037e-05	0.000309053
GTTTGATCTCCGAGAATTGCGGG	23H-RNA	dnj-27_element	5.13174	48.061	0	0	8.43575	2.00528	4.20678	2.59037e-05	0.000309053
TGAGGTTTTCTGCAGTACACGC	23H-RNA	PALTA3	12.8294	39.7025	0	0	8.41606	1.88124	4.47367	7.68881e-06	9.90483e-05
AACCGGACCCTGCCTCTTCATCA	23H-RNA	Y57G11C.1145_hairpin	25.6587	27.1649	0	0	8.41574	1.81337	4.64095	3.46818e-06	4.71597e-05
CATAGGAAATAGATCTAGAACTT	23H-RNA	F58A6.9	25.6587	27.1649	0	0	8.41574	1.81337	4.64095	3.46818e-06	4.71597e-05
CGACGACGATGGCTGCGGCGAGGA	23H-RNA	Y57G11C.1145_hairpin	15.3952	127.466	0.427673	0	8.41315	1.74336	4.82581	1.39433e-06	2.00609e-05
CGCGCGCCGCTATGTTTAACTT	23H-RNA	PALTA3	23.0928	29.2545	0	0	8.40451	1.81965	4.61876	3.86046e-06	5.22851e-05
TTAAACGGTAAGGGCCGGCTGGG	23H-RNA	mir-5592	482.384	1082.42	2.99371	1.65482	8.40209	0.587839	14.2932	2.4137e-46	2.03004e-44
GGTGGAGTGGATGACGACGACGA	23H-RNA	Y57G11C.1145_hairpin	1028.91	4373.55	9.4088	6.61929	8.39745	1.00865	8.32541	8.40347e-17	3.06143e-15
TATCTCGATACCATGTCTCACCC	23H-RNA	Y37E11B.2	1311.16	1379.14	3.84905	4.13706	8.39563	0.391263	21.4577	3.86596e-102	8.92775e-100
TCATCTCTGATCTTTTCCAATT	23H-RNA	F55A4.9, rncs-1	184.743	378.219	0	1.65482	8.39423	0.866758	9.68463	3.50485e-22	1.54044e-20
AATTGTCGGCCGCTGTGGAAACC	23H-RNA	ChrV_unknown_hairpin1	20.527	31.3441	0	0	8.3931	1.82997	4.58646	4.5082e-06	6.05761e-05
CAGCGTGAACTGTCGAGAGTGC	23H-RNA	linc-68, Y49F6A.10	7.69761	43.8817	0	0	8.39121	1.95627	4.28939	1.79167e-05	0.000218741
AATTGTCGGCCGCCGTGGAAAAC	23H-RNA	other	17.9611	33.4337	0	0	8.38147	1.84463	4.54372	5.527e-06	7.28997e-05
TCAGGCCGCCGACATCTCATGGGT	23H-RNA	PALTA3	17.9611	33.4337	0	0	8.38147	1.84463	4.54372	5.527e-06	7.28997e-05
TTCCACGGCGGCCGACAATTTCC	23H-RNA	Unknown_hairpin_RE2	17.9611	33.4337	0	0	8.38147	1.84463	4.54372	5.527e-06	7.28997e-05
TTTCGTCCATACATTGAGGGAGCC	23H-RNA	F39E9.10	17.9611	33.4337	0	0	8.38147	1.84463	4.54372	5.527e-06	7.28997e-05
TTTGGCCAAGCGGACTGGAGCAC	23H-RNA	F55A4.9, rncs-1	17.9611	121.197	0	0.413706	8.37988	1.72605	4.85493	1.20427e-06	1.7437e-05
TCCACATCATCCTCGCCGCAGCC	23H-RNA	Y57G11C.1145_hairpin	30.7905	20.8961	0	0	8.37984	1.82914	4.58129	4.62115e-06	6.19776e-05
TTGCCTCTGAATGCCGAGTAGT	23H-RNA	IR1_CE	5.13174	45.9713	0	0	8.37807	2.01354	4.16087	3.17035e-05	0.000372701
TGGTCTTTGAGTTTCCGATTTCG	23H-RNA	Y17D7C.3	25.6587	112.839	0	0.413706	8.37286	1.68198	4.97798	6.42508e-07	9.62657e-06
CCGCATTTTTTGTAGATCAAACC	23H-RNA	CELE14B	15.3952	35.5233	0	0	8.36955	1.86424	4.48952	7.13838e-06	9.26289e-05
TCGCCGCAGCCATCGTCGTCGTC	23H-RNA	Y57G11C.1145_hairpin	15.3952	35.5233	0	0	8.36955	1.86424	4.48952	7.13838e-06	9.26289e-05
WBGene00219221	pre-miRNA	C28D4.16, mir-5551	15.3952	35.5233	0	0	8.36955	1.86424	4.48952	7.13838e-06	9.26289e-05
TGTGGATGATGGCGTGGAAGAA	23H-RNA	Y57G11C.1145_hairpin	33.3563	104.48	0	0.413706	8.3654	1.64889	5.07336	3.90856e-07	6.02423e-06
TCAATTGTTGTGAAGCTAGCTCC	23H-RNA	W03D2.15	12.8294	37.6129	0	0	8.3573	1.88984	4.42222	9.76897e-06	0.000123471
TGTAGTTTGTAGTCTAGCAGACC	23H-RNA	TGTAGTTTGTAGTCTAGCAGACC_repeat	12.8294	37.6129	0	0	8.3573	1.88984	4.42222	9.76897e-06	0.000123471
TTACGAAGTGGGATTGGAAAATC	23H-RNA	F52G3.8	356.656	603.896	1.28302	1.65482	8.3533	0.653435	12.7837	2.0232e-37	1.39223e-35
TATTAGACTCCACATATCATTTC	23H-RNA	Y37E11B.2	161.65	112.839	0	0.827412	8.34938	1.1436	7.30093	2.85786e-13	8.02851e-12
TTTTTTGGCACCGCTGTTCTGC	23H-RNA	F55A4.9, rncs-1	79.542	194.333	0.855345	0	8.34885	1.18974	7.0174	2.26028e-12	5.93378e-11
TCTGTCACTCTCTAACTATCTAC	23H-RNA	Unknown_RE2	23.0928	27.1649	0	0	8.34499	1.83194	4.55526	5.23197e-06	6.93439e-05
AGAGTGACAGACATCCGGGACCT	23H-RNA	Unknown_RE2	10.2635	39.7025	0	0	8.34466	1.92237	4.34082	1.41953e-05	0.000175191
TATTCCTGATGCGGCGCCGGCTC	23H-RNA	T05E12.8	102.635	169.258	0.855345	0	8.33779	1.15295	7.23173	4.76881e-13	1.31263e-11
TGCAGAGAGCCTAAGGAGCATC	23H-RNA	other	20.527	29.2545	0	0	8.33314	1.84117	4.526	6.01108e-06	7.92078e-05
CGATGTTTCTGAGATGTCTTCACA	23H-RNA	F43E2.6	41.0539	94.0323	0.427673	0	8.33249	1.62342	5.13266	2.85671e-07	4.46873e-06
AATATTTATTTCGCATCCCTCCCC	23H-RNA	Y57G11C.36, Y57G11C.51	7.69761	41.7921	0	0	8.33158	1.96481	4.2404	2.23125e-05	0.000268558
TATACCACTCTATCAGACTACT	23H-RNA	W04C9.8	7.69761	41.7921	0	0	8.33158	1.96481	4.2404	2.23125e-05	0.000268558
TCGACACATTGATCATGCTGATA	23H-RNA	other	7.69761	41.7921	0	0	8.33158	1.96481	4.2404	2.23125e-05	0.000268558
TCGGAAATTGTCGGCCGCCGTG	23H-RNA	Unknown_hairpin_RE2	7.69761	41.7921	0	0	8.33158	1.96481	4.2404	2.23125e-05	0.000268558
AAATTCAAATTTAACTCCGTG	23H-RNA	Y69A2AR.16_hairpin	33.3563	16.7169	0	0	8.33149	1.85808	4.48394	7.32785e-06	9.48167e-05
ACTGCCGCACGGTTTTGAAACTG	23H-RNA	DNA-8-1	169.347	505.685	0.855345	1.24112	8.33127	0.830242	10.0347	1.07235e-23	4.98662e-22
ATTGAGACCAGTGATAGCGACC	23H-RNA	F19G12.2, F58F9.1	17.9611	31.3441	0	0	8.32107	1.855	4.48575	7.26566e-06	9.41014e-05
TCTTCCTGATGTTCTGATCCTTC	23H-RNA	Unknown_IR1	17.9611	31.3441	0	0	8.32107	1.855	4.48575	7.26566e-06	9.41014e-05
AGCCTCGTGATCCTTTGGAGCTG	23H-RNA	Unknown_IR1	15.3952	33.4337	0	0	8.30872	1.87397	4.43377	9.26015e-06	0.000117915
TCATCCTCGCCGCAGCCATCGTCG	23H-RNA	Y57G11C.1145_hairpin	15.3952	33.4337	0	0	8.30872	1.87397	4.43377	9.26015e-06	0.000117915
ATGATGTGGATGATGGCGTGGAA	23H-RNA	Y57G11C.1145_hairpin	38.4881	227.767	0.855345	0	8.3061	1.30192	6.37987	1.77235e-10	4.01134e-09
GCCCGGTGTTGTACGTAGGTGG	23H-RNA	T05E12.8	12.8294	35.5233	0	0	8.29602	1.89916	4.36826	1.2524e-05	0.000156263
TAAACATAGCGGCGCGCGGAAC	23H-RNA	PALTA3	12.8294	35.5233	0	0	8.29602	1.89916	4.36826	1.2524e-05	0.000156263
TTAAACATAGCGGCGCGCGGA	23H-RNA	PALTA3	12.8294	35.5233	0	0	8.29602	1.89916	4.36826	1.2524e-05	0.000156263
TTTCGGACAGATGTGACACGGA	23H-RNA	other	12.8294	35.5233	0	0	8.29602	1.89916	4.36826	1.2524e-05	0.000156263
ATGATGGCGTGGAAGAAGTTG	23H-RNA	Y57G11C.1145_hairpin	82.1079	181.796	0.855345	0	8.29535	1.18284	7.0131	2.33102e-12	6.096e-11
GGATTTCGTCAAGACCGAGGAGCT	23H-RNA	C36A4.14	15.3952	114.928	0	0.413706	8.28554	1.74566	4.74635	2.07117e-06	2.91322e-05
TGTCCCATATCGGTTTGATCTCC	23H-RNA	dnj-27_element	74.4103	185.975	0.855345	0	8.27598	1.19723	6.91259	4.75887e-12	1.21195e-10
GGAGCTGGACGATGGATTCTTTG	23H-RNA	F55A4.9, rncs-1	7.69761	39.7025	0	0	8.26936	1.97422	4.18867	2.80592e-05	0.00033273
TAGAAGACCACTTCCGCAGACGC	23H-RNA	Y37E3.30	7.69761	39.7025	0	0	8.26936	1.97422	4.18867	2.80592e-05	0.00033273
TGTGAAGACATCTCAGAAACATC	23H-RNA	F43E2.6	7.69761	39.7025	0	0	8.26936	1.97422	4.18867	2.80592e-05	0.00033273
TGTGGCCCGCGGTAATTACATCC	23H-RNA	F41F3.10	7.69761	39.7025	0	0	8.26936	1.97422	4.18867	2.80592e-05	0.00033273
AAGGATCGATTCATAAATTTTGA	23H-RNA	AAGGATCGATTCATAAATTTTGA_Repeat	30.7905	98.2115	0.427673	0	8.26684	1.65895	4.98317	6.25514e-07	9.41727e-06
TACGGGAAAAGCAGAGAGGCCAC	23H-RNA	F39E9.7	110.332	148.362	0.855345	0	8.26481	1.14485	7.21912	5.23262e-13	1.43162e-11
TCCGTGTCACATCTGTCCGAAAT	23H-RNA	other	17.9611	29.2545	0	0	8.25801	1.86673	4.42379	9.69841e-06	0.000122807
TCTTCTCGGCTCTTCGAGCGCGT	23H-RNA	ChrIII_hairpin1	17.9611	29.2545	0	0	8.25801	1.86673	4.42379	9.69841e-06	0.000122807
CTCTTACTGTAGTTTTCGCTA	23H-RNA	PALTA4	138.557	369.86	1.28302	0.413706	8.24117	0.896708	9.19048	3.91083e-20	1.60497e-18
GTCGTCGTCATCCACTCCACCG	23H-RNA	Y57G11C.1145_hairpin	48.7516	77.3154	0	0.413706	8.23322	1.60848	5.11863	3.0777e-07	4.8034e-06
CAGACATGATCTGGAGATGTTT	23H-RNA	Y116A8B.1	12.8294	33.4337	0	0	8.232	1.90951	4.31106	1.62472e-05	0.000199072
MIMAT0022185	miRNA	miR-5547-5p	179.611	198.513	0.427673	0.827412	8.22911	0.933016	8.81991	1.14552e-18	4.51092e-17
ACTATCTACACTCTCTGTACCGG	23H-RNA	Unknown_RE2	10.2635	35.5233	0	0	8.2184	1.94166	4.23267	2.30937e-05	0.000276982
TGTATTAAACGGTAAGGGCCG	23H-RNA	mir-5592	3569.13	4829.08	17.9623	10.3426	8.21677	0.293647	27.9818	2.70886e-172	1.53784e-169
CGTCGTCGTCATCCACTCCACCG	23H-RNA	Y57G11C.1145_hairpin	7.69761	37.6129	0	0	8.2043	1.98463	4.13393	3.56618e-05	0.000416003
CTGATCTCTCTTCTCGGCTCTT	23H-RNA	ChrIII_hairpin1	110.332	135.824	0.855345	0	8.19237	1.14626	7.14706	8.8656e-13	2.40147e-11
ATTGGGTCAGGGAAGTACTTCG	23H-RNA	W05H12.4	17.9611	27.1649	0	0	8.19205	1.88	4.35747	1.31573e-05	0.00016312
CGAGGATGATGTGGATGATGG	23H-RNA	Y57G11C.1145_hairpin	17.9611	27.1649	0	0	8.19205	1.88	4.35747	1.31573e-05	0.00016312
CGGAAATTCGTTGATTGAGACA	23H-RNA	other	17.9611	27.1649	0	0	8.19205	1.88	4.35747	1.31573e-05	0.00016312
TTTCGGGGTACGGTATCTAATAG	23H-RNA	ChrIII_hairpin2	17.9611	27.1649	0	0	8.19205	1.88	4.35747	1.31573e-05	0.00016312
CCAAACTGGATTGACGAGCATCG	23H-RNA	F55A4.9, rncs-1	130.859	114.928	0.427673	0.413706	8.18942	1.13919	7.1888	6.53649e-13	1.78119e-11
CTTCGTCATCTGATGCGGTTGTTC	23H-RNA	F55A4.9, rncs-1	23.0928	98.2115	0	0.413706	8.18212	1.69679	4.82212	1.42041e-06	2.04146e-05
CAATAAAAACAATGGACAACTG	23H-RNA	Y59H11AR.6	646.6	1040.62	1.71069	4.13706	8.167	0.500636	16.3132	7.94594e-60	9.09776e-58
TGAGACATGGTATCGAGATATG	23H-RNA	Y37E11B.2	212.967	386.577	0.427673	1.65482	8.16137	0.776264	10.5137	7.47435e-26	3.68979e-24
WBGene00003331	pre-miRNA	K01F9.5, mir-238	45262	75982.3	174.063	250.706	8.15683	0.275327	29.626	6.92018e-193	5.23819e-190
ATCGGTGTGCTCGAGGGCTTGT	23H-RNA	Y37E3.30	69.2785	288.366	0.427673	0.827412	8.15404	1.07023	7.61893	2.5579e-14	7.81421e-13
ACGGAGTTAAATTTGAATTTTTT	23H-RNA	Y69A2AR.16_hairpin	33.3563	85.6739	0	0.413706	8.15353	1.65111	4.9382	7.8845e-07	1.16514e-05
TTTCCAATGTGCTCCAGTCCGCT	23H-RNA	F55A4.9, rncs-1	10.2635	33.4337	0	0	8.15081	1.95355	4.17232	3.01518e-05	0.000355995
ATCTACATGTGATCTACGCGAAT	23H-RNA	pcp-4, Unknown_RE8, Y116F11B.3, Y15E3A.3, Y6B3B.7, Y6B3B.9	20.527	22.9857	0	0	8.13657	1.88496	4.31657	1.58475e-05	0.000194524
GTTCTGTGGGCGGGGCCAATCC	23H-RNA	DNA-8-1	20.527	22.9857	0	0	8.13657	1.88496	4.31657	1.58475e-05	0.000194524
TTGTGAAGACATCTCAGAAACA	23H-RNA	F43E2.6	210.401	263.29	1.71069	0	8.13599	0.830289	9.79898	1.13726e-22	5.08038e-21
GGAGTGGATGACGACGACGATGG	23H-RNA	Y57G11C.1145_hairpin	53.8833	296.724	0.855345	0.413706	8.12111	1.10905	7.32257	2.43269e-13	6.9197e-12
ATCCCAGAACTGGAAATCTTCAC	23H-RNA	other	5.13174	37.6129	0	0	8.12083	2.05571	3.95038	7.8028e-05	0.000866447
CGACACGTTCTACGAGGGAATT	23H-RNA	F55A4.9, rncs-1	43.6198	73.1362	0.427673	0	8.12041	1.62223	5.0057	5.56605e-07	8.41704e-06
TAGTTTTGATGACTGGATCTACC	23H-RNA	Y116F11A.1	384.881	892.262	0.855345	3.72335	8.11603	0.617865	13.1356	2.05839e-39	1.46835e-37
CTTTCAGCATCGACCACGGCTTT	23H-RNA	F55A4.9, rncs-1	15.3952	27.1649	0	0	8.10894	1.91145	4.24229	2.2125e-05	0.000267246
TCCGCGCGCCGCTGTGTTTAACT	23H-RNA	other	15.3952	27.1649	0	0	8.10894	1.91145	4.24229	2.2125e-05	0.000267246
TCGGAAACTGAAGCCCCAAAATC	23H-RNA	other	15.3952	27.1649	0	0	8.10894	1.91145	4.24229	2.2125e-05	0.000267246
AAATTGTCGGCCGCCGTGGAAA	23H-RNA	Unknown_hairpin_RE2	28.2246	14.6272	0	0	8.10703	1.9139	4.23587	2.27669e-05	0.000273544
TTTGGCCAAGCGGACTGGAGCACA	23H-RNA	F55A4.9, rncs-1	41.0539	305.083	0.427673	0.827412	8.107	1.15058	7.04599	1.8415e-12	4.85309e-11
TCAGCGGTCTCGTTATGAAAATC	23H-RNA	PAL5A	2.56587	39.7025	0	0	8.10462	2.14892	3.77148	0.00016228	0.00170082
ACTTCTTCCACGCCATCATCCACA	23H-RNA	Y57G11C.1145_hairpin	107.767	123.287	0.855345	0	8.10024	1.15103	7.03737	1.95907e-12	5.15297e-11
TCAAACATTCGGCAATGGGGTA	23H-RNA	Y37E3.30	38.4881	4.17921	0	0	8.09566	2.08654	3.87994	0.000104483	0.00113705
CTCAGGATTTTGAGTGAGGCTCA	23H-RNA	M4.2, puf-4	12.8294	29.2545	0	0	8.09464	1.93453	4.18429	2.86063e-05	0.000338628
TTTCTGAGATGTCTTCACAATTCT	23H-RNA	F43E2.6	12.8294	29.2545	0	0	8.09464	1.93453	4.18429	2.86063e-05	0.000338628
CCACCGTGTCTGGTCTCCTCGC	23H-RNA	ZK402.3	25.6587	16.7169	0	0	8.09289	1.90497	4.24831	2.15387e-05	0.00026109
WBGene00003349	pre-miRNA	F08F3.11, mir-255	25.6587	16.7169	0	0	8.09289	1.90497	4.24831	2.15387e-05	0.00026109
ACGATGGATTCTTTGGAGCAACC	23H-RNA	F55A4.9, rncs-1	69.2785	158.81	0.427673	0.413706	8.08899	1.19357	6.77714	1.22575e-11	3.02004e-10
ATTCCACTTGCATCATACGACG	23H-RNA	F52D2.6	74.4103	152.541	0	0.827412	8.08464	1.19252	6.77946	1.20629e-11	2.98831e-10
TGAAATCGTGGGAGGGGCTTAAA	23H-RNA	Unknown_RE7	10.2635	31.3441	0	0	8.07988	1.96621	4.10937	3.96734e-05	0.000459652
TCATCAGCTCCATCAACACCA	23H-RNA	C36A4.14	35.9222	6.26882	0	0	8.07976	2.03228	3.97571	7.01695e-05	0.000785587
AGGCACAGTTCTGTGGGCGGGG	23H-RNA	24F12A.4, H15N14.4, H37A05.4, Y24F12A.3	7.69761	33.4337	0	0	8.06458	2.0091	4.01403	5.96902e-05	0.00067492
CATCCCGATCGTTCGTCGTCGC	23H-RNA	ChrX_intergenic1	20.527	20.8961	0	0	8.06458	1.90408	4.23543	2.28113e-05	0.000273836
CGTACACAACCGAGCTCCGCC	23H-RNA	F49B2.3, Y116A8B.1	76.9761	35.5233	0	0.413706	8.05774	1.6457	4.89624	9.769e-07	1.42814e-05
CTATCAATACTCTATGTTTTTT	23H-RNA	C35D6.3	17.9611	22.9857	0	0	8.05023	1.91251	4.20926	2.56212e-05	0.000306218
ACCACTTCCGCAGACGCTACA	23H-RNA	Y37E3.30	33.3563	77.3154	0	0.413706	8.04818	1.65342	4.86761	1.12958e-06	1.64017e-05
TCTCAGAAACATCGGCAAATGGC	23H-RNA	F43E2.6	15.3952	25.0753	0	0	8.03563	1.92744	4.16906	3.05856e-05	0.000360181
ACGTGTCGCTTCGTCATCTGATG	23H-RNA	F55A4.9, rncs-1	123.162	537.029	1.71069	0.827412	8.03199	0.84861	9.46488	2.93908e-21	1.25533e-19
TTTCTGAGATGTCTTCACAAT	23H-RNA	F43E2.6	25.6587	83.5843	0	0.413706	8.03086	1.68593	4.76345	1.90306e-06	2.68975e-05
AATCGGAAACTCAAAGACCAC	23H-RNA	Y17D7C.3	882.66	1521.23	4.27673	4.96447	8.02353	0.433574	18.5056	1.86179e-76	2.98434e-74
CACGCCATCATCCACATCATCCT	23H-RNA	Y57G11C.1145_hairpin	25.6587	14.6272	0	0	8.01873	1.933	4.14833	3.34916e-05	0.000392367
TCTCAATGGAAAATTCTGCATG	23H-RNA	F31A9.2	30.7905	77.3154	0	0.413706	8.0148	1.66378	4.81723	1.45562e-06	2.08986e-05
CAACGTCTCGGCTAGCCACCTA	23H-RNA	T05E12.8	41.0539	66.8674	0	0.413706	8.00947	1.63327	4.90395	9.39262e-07	1.37459e-05
ACTCCACCGTAATACAGTTTTCC	23H-RNA	other	10.2635	29.2545	0	0	8.00524	1.98078	4.04145	5.31209e-05	0.000605161
TCCTCGGTCTTGACGAAATCCC	23H-RNA	C36A4.14	23.0928	16.7169	0	0	8.00379	1.92644	4.1547	3.25708e-05	0.000381908
GAAGGGCAAAGAGTGCGATATC	23H-RNA	jmjc-1, T28F2.4	38.4881	68.957	0.427673	0	8.00094	1.63909	4.88132	1.05377e-06	1.53887e-05
CAAAATACCAGATTGTCCTTCA	23H-RNA	F39E9.29_region	33.3563	6.26882	0	0	7.98923	2.04891	3.89926	9.64882e-05	0.00105764
AAATTGTCGGCCGCCGTGGAAAA	23H-RNA	other	20.527	18.8065	0	0	7.98881	1.92623	4.14739	3.36291e-05	0.000393639
TAGTTTTCGGGGTACGGTATCT	23H-RNA	ChrIII_hairpin2	48.7516	162.989	0	0.827412	7.98685	1.25662	6.35581	2.07325e-10	4.66909e-09
AAATCGGAAACTCAAAGACCACA	23H-RNA	Y17D7C.3	120.596	198.513	1.28302	0	7.98262	0.97927	8.15161	3.59116e-16	1.2546e-14
CCCGCGGGTGATGACAGAAAC	23H-RNA	dnj-27_element	17.9611	20.8961	0	0	7.9737	1.93254	4.12602	3.69099e-05	0.000429827
TGTGAAGACATCTCAGAAACAT	23H-RNA	F43E2.6	17.9611	20.8961	0	0	7.9737	1.93254	4.12602	3.69099e-05	0.000429827
TCACGGAGTTAAATTTGAATT	23H-RNA	Y69A2AR.16_hairpin	30.7905	8.35843	0	0	7.9728	2.01092	3.96474	7.34755e-05	0.000820486
TGATCTACAAAAAATGCGGGAATT	23H-RNA	CELE14B	5.13174	33.4337	0	0	7.97253	2.08407	3.82547	0.000130525	0.00139373
CCGATGTTTCTGAGATGTCTTCA	23H-RNA	F43E2.6	916.016	1510.79	6.41509	3.30965	7.96977	0.428998	18.5776	4.87394e-77	7.90565e-75
MIMAT0032814	miRNA	miR-8200-3p	15.3952	22.9857	0	0	7.95836	1.94584	4.08993	4.31501e-05	0.000496554
TAACAGGGATGAAGTAACGCCA	23H-RNA	other	15.3952	22.9857	0	0	7.95836	1.94584	4.08993	4.31501e-05	0.000496554
TGTTCCCTGTGGAGACCCTCACC	23H-RNA	other, Y116A8B.1	15.3952	22.9857	0	0	7.95836	1.94584	4.08993	4.31501e-05	0.000496554
TAACGAGACCGCTGAAAAAGTTT	23H-RNA	PAL5A	43.6198	60.5986	0	0.413706	7.95767	1.63164	4.87711	1.0765e-06	1.56702e-05
AATTGTGAAGACATCTCAGAAA	23H-RNA	F43E2.6	438.764	597.628	2.13836	2.06853	7.94705	0.550071	14.4473	2.60595e-47	2.30559e-45
MIMAT0032829	miRNA	miR-8206-5p	256.587	261.201	1.28302	0.827412	7.94336	0.740809	10.7225	7.97759e-27	4.02573e-25
TCGGGGACCAACCAATATCAGGC	23H-RNA	PALTA3	25.6587	12.5376	0	0	7.94062	1.96612	4.03874	5.37402e-05	0.000611704
TTGTGAAGACATCTCAGAAAC	23H-RNA	F43E2.6	431.066	495.237	1.71069	2.06853	7.93648	0.564405	14.0617	6.53309e-45	5.36225e-43
MIMAT0000700	miRNA	miR-358-3p	1857.69	1853.48	9.4088	5.79188	7.93586	0.312616	25.3854	3.65967e-142	1.60848e-139
TCGACAACTAATTCCCGAATCTC	23H-RNA	T05E12.8	192.44	328.068	2.13836	0	7.93417	1.60938	4.92995	8.22503e-07	1.21284e-05
CAACGTCTCGGCTAGCCACCT	23H-RNA	T05E12.8	230.928	378.219	0	2.48224	7.934	1.70005	4.66693	3.05728e-06	4.19069e-05
TCGTCGTCGTCATCCACTCCAC	23H-RNA	Y57G11C.1145_hairpin	133.425	173.437	0	1.24112	7.93169	0.966531	8.20634	2.28026e-16	8.08666e-15
MIMAT0020330	miRNA	miR-234-5p	379.749	438.817	0.855345	2.48224	7.92949	0.601203	13.1894	1.01024e-39	7.2828e-38
AGACGCGCGCACTCCCAACTCG	23H-RNA	TC5A	1867.95	3654.72	10.6918	11.9975	7.92746	0.3664	21.6361	8.22027e-104	2.00002e-101
GGTGGAGTGGATGACGACGACG	23H-RNA	Y57G11C.1145_hairpin	1303.46	5242.82	13.2579	13.6523	7.9265	0.939997	8.43248	3.38424e-17	1.25641e-15
CCTTGATTCTCAAAGTGCAGACC	23H-RNA	W03D2.15	10.2635	27.1649	0	0	7.92649	1.99727	3.96867	7.22764e-05	0.000807847
TTGTGTTCGTCCTCCATACATTG	23H-RNA	C36A4.14	10.2635	27.1649	0	0	7.92649	1.99727	3.96867	7.22764e-05	0.000807847
CAGTGGAGTGGATGACGACGACG	23H-RNA	Y57G11C.1145_hairpin	53.8833	353.144	1.28302	0.413706	7.91865	1.04298	7.59237	3.14116e-14	9.51075e-13
AATCTACTTAAATCAACGAAT	23H-RNA	mek-2, Y54E10BL.6, Y71F9AL.1	33.3563	4.17921	0	0	7.91047	2.1222	3.72748	0.000193405	0.00200697
ATCTACCTGTTGAACTTGACTCT	23H-RNA	F08B1.2, gcy-12	7.69761	29.2545	0	0	7.90973	2.03968	3.87792	0.000105354	0.00114287
CGACCGGACGCCGATTTGTACAG	23H-RNA	Unknown_hairpin_RE2	7.69761	29.2545	0	0	7.90973	2.03968	3.87792	0.000105354	0.00114287
TATTGAAAATGTGGGATGACGC	23H-RNA	E01G4.7	7.69761	29.2545	0	0	7.90973	2.03968	3.87792	0.000105354	0.00114287
CCTCCCGATAGAATGAATTTTC	23H-RNA	Y57G11C.1144	20.527	16.7169	0	0	7.90885	1.95209	4.05147	5.08965e-05	0.000582254
TCAAAGGATCCGGTGAGGCTAA	23H-RNA	W04B5.8	20.527	16.7169	0	0	7.90885	1.95209	4.05147	5.08965e-05	0.000582254
CGGATAGTGTGATCTTAGAACCC	23H-RNA	Y116F11A.1	156.518	244.484	0.855345	0.827412	7.90066	0.848122	9.31548	1.21405e-20	5.04311e-19
AAACTGGATTGACGAGCATCGAG	23H-RNA	F55A4.9, rncs-1	28.2246	71.0466	0	0.413706	7.89205	1.67795	4.70337	2.559e-06	3.53665e-05
TGATCTACCTGTTGAACTTGACC	23H-RNA	other	28.2246	8.35843	0	0	7.87529	2.03136	3.87686	0.000105812	0.0011451
ATTTGCCGATGTTTCTGAGAT	23H-RNA	F43E2.6	454.159	1408.39	2.99371	4.96447	7.86942	0.56823	13.849	1.28976e-43	1.00417e-41
AAGCGACACGTTCTACGAGGG	23H-RNA	F55A4.9, rncs-1	12.8294	22.9857	0	0	7.86015	1.9868	3.95618	7.61564e-05	0.000847045
GTTTGGCCAAGCGGACTGGAGC	23H-RNA	F55A4.9, rncs-1	12.8294	22.9857	0	0	7.86015	1.9868	3.95618	7.61564e-05	0.000847045
MIMAT0011463	miRNA	miR-2221	25.6587	10.448	0	0	7.85813	2.00593	3.91746	8.9488e-05	0.000983285
TTGAAGAATTTGAGTGAGGCTGA	23H-RNA	M4.2, puf-4	25.6587	10.448	0	0	7.85813	2.00593	3.91746	8.9488e-05	0.000983285
TTTCTGTCATCACCCGCGGGGCT	23H-RNA	other	25.6587	10.448	0	0	7.85813	2.00593	3.91746	8.9488e-05	0.000983285
AATTGTGAAGACATCTCAGAA	23H-RNA	F43E2.6	307.905	284.187	2.56604	0	7.85529	1.67669	4.68499	2.79975e-06	3.85709e-05
AATCGGGATGGATCGATGGATT	23H-RNA	T05E12.10	105.201	183.885	0	1.24112	7.84818	0.996599	7.87496	3.40848e-15	1.1031e-13
CAGCGTCGTACGATGAAAGATG	23H-RNA	F52G3.8	84.6737	108.66	0.427673	0.413706	7.84706	1.16898	6.71275	1.90986e-11	4.66341e-10
TGTTCTGCTCTCTCTTTCAGCT	23H-RNA	F55A4.9, rncs-1	35.9222	60.5986	0.427673	0	7.84575	1.65357	4.74474	2.08774e-06	2.93252e-05
AAAAATTCAAATTTAACTCCGTG	23H-RNA	Y69A2AR.16_hairpin	10.2635	25.0753	0	0	7.84315	2.01614	3.89018	0.000100168	0.00109183
AAACATTCGGCAATGGGGTACCC	23H-RNA	Y37E3.30	10.2635	25.0753	0	0	7.84315	2.01614	3.89018	0.000100168	0.00109183
AAAGGATCACGAGGCTCTTCCTG	23H-RNA	Unknown_IR1	10.2635	25.0753	0	0	7.84315	2.01614	3.89018	0.000100168	0.00109183
CTCATCTCTGATCTTTTCCAATT	23H-RNA	F55A4.9, rncs-1	30.7905	160.9	0.855345	0	7.83283	1.32536	5.90999	3.42135e-09	6.83517e-08
TGCGGCGAGGATGATGTGGATG	23H-RNA	Y57G11C.1145_hairpin	7.69761	27.1649	0	0	7.82551	2.0586	3.80138	0.000143892	0.00151979
TCACTGTTGCGGATGGTCCAGG	23H-RNA	F57G8.14, F57G8.15, linc-59	20.527	14.6272	0	0	7.82421	1.98256	3.94651	7.92973e-05	0.000878395
TATTTGGAACAGAAGCAAGAGGA	23H-RNA	F19B2.5	17.9611	16.7169	0	0	7.80724	1.98305	3.93698	8.25142e-05	0.000911104
TCGCGTAGATCACATGTAGATCA	23H-RNA	pcp-4, Unknown_RE8, Y116F11B.3, Y15E3A.3, Y6B3B.7, Y6B3B.9	17.9611	16.7169	0	0	7.80724	1.98305	3.93698	8.25142e-05	0.000911104
CAAAACTGCTGTTTCCCCTGTG	23H-RNA	Y59H11AR.6	5.13174	29.2545	0	0	7.80709	2.1197	3.68312	0.000230399	0.00234618
TCACGGGGAAAAGGCAAAATTCG	23H-RNA	PALTA3	5.13174	29.2545	0	0	7.80709	2.1197	3.68312	0.000230399	0.00234618
TCTGTACGTCCATTTGGCAATA	23H-RNA	Y105C5A.14	5.13174	29.2545	0	0	7.80709	2.1197	3.68312	0.000230399	0.00234618
AATTCTCTCGTAGAACGTGTCG	23H-RNA	F55A4.9, rncs-1	59.015	33.4337	0	0.413706	7.77583	1.66431	4.6721	2.98134e-06	4.09896e-05
CGGCGCGCGGAACCCATGAGATG	23H-RNA	PALTA3	23.0928	160.9	0.855345	0	7.77291	1.36889	5.67826	1.36073e-08	2.49864e-07
TCCACGCCATCATCCACATCATCC	23H-RNA	Y57G11C.1145_hairpin	25.6587	8.35843	0	0	7.77077	2.05483	3.78171	0.000155756	0.00163495
AGGTACAGAACTGTGGGCGGGGC	23H-RNA	Y24F12A.3, Y24F12A.4	10.2635	22.9857	0	0	7.75464	2.03788	3.80525	0.000141663	0.00150324
TTTCTGTCATCACCCGCGGGGC	23H-RNA	dnj-27_element	10.2635	22.9857	0	0	7.75464	2.03788	3.80525	0.000141663	0.00150324
AGCGAAAACTACAGTAAGAACT	23H-RNA	PALTA4	23.0928	10.448	0	0	7.75249	2.0317	3.81577	0.000135759	0.00144396
CCGCGCGCCGCTATGTTTAACTT	23H-RNA	PALTA3	23.0928	10.448	0	0	7.75249	2.0317	3.81577	0.000135759	0.00144396
CAATGTGCTCCAGTCCGCTTGGC	23H-RNA	F55A4.9, rncs-1	7.69761	25.0753	0	0	7.73604	2.07956	3.72005	0.000199187	0.00206225
TTCGGACAGATGTGACACGGA	23H-RNA	PALTTAA3	7.69761	25.0753	0	0	7.73604	2.07956	3.72005	0.000199187	0.00206225
TGGCCAAACTGGATTGACGAGC	23H-RNA	F55A4.9, rncs-1	64.1468	114.928	0.855345	0	7.7351	1.20848	6.40067	1.54701e-10	3.52476e-09
TTCAAACATTCGGCAATGGGGTA	23H-RNA	Y37E3.30	48.7516	129.556	0.427673	0.413706	7.7347	1.23666	6.25451	3.98775e-10	8.66557e-09
ACCAATTGTACTTTGTAGGAGCC	23H-RNA	Y116A8B.1	61.5809	206.871	1.28302	0	7.73251	1.08799	7.10716	1.18455e-12	3.1584e-11
AAAAATGTAGAAGCTGTGGGCA	23H-RNA	E01G4.5	84.6737	94.0323	0.855345	0	7.72871	1.18305	6.53286	6.45244e-11	1.52101e-09
AGAAACTTGGACTTTTTCGCTGG	23H-RNA	F55A4.9, rncs-1	41.0539	48.061	0.427673	0	7.72709	1.65415	4.67134	2.99242e-06	4.10591e-05
CCCTTCTACTTGGACGGAACA	23H-RNA	Y17D7C.3	15.3952	73.1362	0.427673	0	7.72458	1.75996	4.38906	1.13841e-05	0.000143221
WBGene00235080	pre-miRNA	F55F3.10, mir-5592.1	2601.79	3433.22	16.2516	12.4112	7.72054	0.278812	27.6909	8.98793e-169	4.89842e-166
AGCACTAATAGAGAATATACGGT	23H-RNA	Unknown_RE6	5.13174	27.1649	0	0	7.7166	2.14112	3.604	0.000313355	0.00310281
AATTCCAAAACTGCTGTTTCCCC	23H-RNA	Y59H11AR.6	143.689	114.928	0	1.24112	7.68082	0.984451	7.80214	6.08685e-15	1.91532e-13
TTCGCGTAGATCACATGTAGATC	23H-RNA	pcp-4, Unknown_RE8, Y116F11B.3, Y15E3A.3, Y6B3B.7, Y6B3B.9	12.8294	18.8065	0	0	7.67935	2.03638	3.77108	0.00016254	0.00170224
AAACCGCCGGAATTTTCAGCC	23H-RNA	other	25.6587	6.26882	0	0	7.67797	2.11641	3.62784	0.000285807	0.00286122
TTACCTATCGGCTTTAAATGT	23H-RNA	PALTTAA3	10.2635	20.8961	0	0	7.66031	2.06308	3.71304	0.000204787	0.00211221
TTCCTCGTTTGGATATGTAGAAGA	23H-RNA	Y17D7C.3	10.2635	20.8961	0	0	7.66031	2.06308	3.71304	0.000204787	0.00211221
TTGTCTTCCTTTTGTTTCTCTTC	23H-RNA	F19B2.5	10.2635	20.8961	0	0	7.66031	2.06308	3.71304	0.000204787	0.00211221
TTTGTTTCTCTTCCTCTTGCTTC	23H-RNA	F19B2.5	10.2635	20.8961	0	0	7.66031	2.06308	3.71304	0.000204787	0.00211221
TGTTCGTCCTCCATACATTGCC	23H-RNA	C36A4.14	23.0928	8.35843	0	0	7.65816	2.08285	3.67676	0.000236211	0.00239641
TTAAACGGTAAGGGCCGGCTGG	23H-RNA	mir-5592	2324.68	3107.25	16.2516	10.7564	7.65536	0.291923	26.2239	1.4197e-151	6.67014e-149
CCGCCCACAGTTCTGTACCTTG	23H-RNA	Y24F12A.3, Y24F12A.4	12.8294	71.0466	0.427673	0	7.64673	1.78652	4.28023	1.86704e-05	0.000227535
TCGTATGATGCAAGTGGAATTT	23H-RNA	F52D2.6	12.8294	71.0466	0.427673	0	7.64673	1.78652	4.28023	1.86704e-05	0.000227535
ATCGTCGTCGTCATCCACTCCA	23H-RNA	Y57G11C.1145_hairpin	482.384	442.997	2.56604	2.06853	7.64286	0.523129	14.6099	2.42882e-48	2.19157e-46
CCGGATGTCTGTCACTCTCTAAC	23H-RNA	Unknown_RE2	7.69761	22.9857	0	0	7.6406	2.10391	3.63161	0.000281654	0.00282172
CGCGCCGCTATGTTTAACTCGCA	23H-RNA	PALTA3	7.69761	22.9857	0	0	7.6406	2.10391	3.63161	0.000281654	0.00282172
MIMAT0011459	miRNA	miR-2219-5p	7.69761	22.9857	0	0	7.6406	2.10391	3.63161	0.000281654	0.00282172
CTCCAGTCCGCTTGGCCAAACT	23H-RNA	F55A4.9, rncs-1	20.527	10.448	0	0	7.63857	2.06268	3.70323	0.000212871	0.00218073
TCCGCGCACCGCTATGTTTAACT	23H-RNA	other, Y64G10A.10	20.527	10.448	0	0	7.63857	2.06268	3.70323	0.000212871	0.00218073
TGTTTTACACCGGATTGCCAGT	23H-RNA	Y116F11A.1	20.527	10.448	0	0	7.63857	2.06268	3.70323	0.000212871	0.00218073
CTCGGAAATTGTCGGCCGCTGTG	23H-RNA	ChrV_unknown_hairpin1, other	5.13174	25.0753	0	0	7.62	2.16561	3.51864	0.000433767	0.0041777
GGACCACCGAGACGCATGATA	23H-RNA	Y37E3.30	5.13174	25.0753	0	0	7.62	2.16561	3.51864	0.000433767	0.0041777
TTTCTGCAGTACACGCCACGC	23H-RNA	PALTA3	5.13174	25.0753	0	0	7.62	2.16561	3.51864	0.000433767	0.0041777
WBGene00219232	pre-miRNA	mir-5547, Y57A10A.42	5.13174	25.0753	0	0	7.62	2.16561	3.51864	0.000433767	0.0041777
ACTTCTTCCACGCCATCATCC	23H-RNA	Y57G11C.1145_hairpin	17.9611	12.5376	0	0	7.61906	2.0537	3.70992	0.000207325	0.00213515
TGTGGGCCCTCGCACTGTCTACC	23H-RNA	E01G4.5	17.9611	12.5376	0	0	7.61906	2.0537	3.70992	0.000207325	0.00213515
TTGCCAAATGGACGTACAGATC	23H-RNA	Y105C5A.14	76.9761	6.26882	0.427673	0	7.61553	1.87688	4.05754	4.95928e-05	0.000568294
TCATGCGTCTCGGTGGTCCGAA	23H-RNA	Y37E3.30	125.728	284.187	1.28302	0.827412	7.61043	0.825876	9.21498	3.11343e-20	1.28158e-18
WBGene00219231	pre-miRNA	mir-5545, Y47H9C.21	23.0928	58.509	0	0.413706	7.60982	1.71507	4.43702	9.12112e-06	0.000116363
TTTGGCATCGCCCGTGGTATTCC	23H-RNA	T05E12.8	1616.5	2883.66	7.69811	15.3071	7.60935	0.375119	20.2851	1.7398e-91	3.3387e-89
TTACAGTACTCCTGAAAGGCACA	23H-RNA	B0303.7	15.3952	14.6272	0	0	7.59947	2.0553	3.6975	0.00021773	0.00222883
TCTCGCCGTCCATCGACTTTAAA	23H-RNA	PALTTAA1	2.56587	27.1649	0	0	7.5981	2.26774	3.35052	0.000806603	0.00730715
CTCCATACGGTCATTTGAGTCTC	23H-RNA	F34D6.11, linc-12	64.1468	98.2115	0.427673	0.413706	7.59682	1.20013	6.32997	2.45202e-10	5.45004e-09
ATCTCAGAAACATCGGCAAAT	23H-RNA	F43E2.6	230.928	334.337	1.28302	1.65482	7.58854	0.66652	11.3853	4.94876e-30	2.70791e-28
TATTAGACTCCACATATCATTT	23H-RNA	Y37E11B.2	107.767	52.2402	0.855345	0	7.56116	1.23809	6.1071	1.01456e-09	2.13652e-08
AGTGGGCCGAGCGATTCGCTGA	23H-RNA	Y116A8C.27	10.2635	18.8065	0	0	7.55932	2.09259	3.61243	0.000303346	0.00300807
ATTGCCAGTCGAGTCAGAAAATC	23H-RNA	Y116F11A.1	10.2635	18.8065	0	0	7.55932	2.09259	3.61243	0.000303346	0.00300807
CAGCGAATCGCTCTGCCCACTT	23H-RNA	Y116A8C.27	10.2635	18.8065	0	0	7.55932	2.09259	3.61243	0.000303346	0.00300807
CCTTCGACATCTCTGATAACAA	23H-RNA	F58A4.3, hcp-3	10.2635	18.8065	0	0	7.55932	2.09259	3.61243	0.000303346	0.00300807
CGTAGGATGTCGGCGGCCTGATA	23H-RNA	PALTA3	10.2635	18.8065	0	0	7.55932	2.09259	3.61243	0.000303346	0.00300807
CTAATAACCGGTATACCGAATT	23H-RNA	E01G4.7	10.2635	18.8065	0	0	7.55932	2.09259	3.61243	0.000303346	0.00300807
GAAGGCGCGCTCGAAGAGCCGAG	23H-RNA	ChrIII_hairpin1	10.2635	18.8065	0	0	7.55932	2.09259	3.61243	0.000303346	0.00300807
TAACGAGACCGCTGAAAAAGTC	23H-RNA	W09C5.9	10.2635	18.8065	0	0	7.55932	2.09259	3.61243	0.000303346	0.00300807
TTCTACATATCCAAACGAGGAAC	23H-RNA	Y17D7C.3	10.2635	18.8065	0	0	7.55932	2.09259	3.61243	0.000303346	0.00300807
AGCAGACGCTCATGACCACTT	23H-RNA	Y17D7B.4	23.0928	6.26882	0	0	7.55744	2.14798	3.51839	0.000434175	0.0041777
TACTGTAGCGCTTGTGTCGATT	23H-RNA	CELE1	23.0928	6.26882	0	0	7.55744	2.14798	3.51839	0.000434175	0.0041777
MIMAT0022198	miRNA	miR-5553-3p	351.524	589.269	2.99371	2.06853	7.54406	0.549296	13.7341	6.3479e-43	4.83185e-41
TCTTCCACGCCATCATCCACATC	23H-RNA	Y57G11C.1145_hairpin	7.69761	20.8961	0	0	7.53834	2.1322	3.53547	0.000407055	0.00394742
TTGGTGGGCCCTAGACGATTTTG	23H-RNA	MTCE.11, nduo-1	7.69761	20.8961	0	0	7.53834	2.1322	3.53547	0.000407055	0.00394742
TGATGGCGTGGAAGAAGTTGA	23H-RNA	Y57G11C.1145_hairpin	12.8294	64.7778	0.427673	0	7.53482	1.79252	4.20348	2.62841e-05	0.000313317
CGGCTCTTCGAGCGCGTCTTCTT	23H-RNA	ChrIII_hairpin1	230.928	311.351	1.28302	1.65482	7.52824	0.66334	11.349	7.50286e-30	4.05661e-28
ATCCTCGCCGCAGCCATCGTCG	23H-RNA	Y57G11C.1145_hairpin	5.13174	22.9857	0	0	7.51642	2.19353	3.42664	0.000611099	0.0056564
CGTGTCGCATCTGTCCGAAGTTG	23H-RNA	other, tbc-9, Y45F10A.6	5.13174	22.9857	0	0	7.51642	2.19353	3.42664	0.000611099	0.0056564
TCATCTAAGGCTAAATATCGA	23H-RNA	F31C3.9, rrn-3.1	5.13174	22.9857	0	0	7.51642	2.19353	3.42664	0.000611099	0.0056564
TGTGTTCGTCCTCCATACATTG	23H-RNA	C36A4.14	5.13174	22.9857	0	0	7.51642	2.19353	3.42664	0.000611099	0.0056564
CAAATCGTCTCTTCCGCGCGCC	23H-RNA	Unknown_RE2	17.9611	10.448	0	0	7.51496	2.10034	3.57797	0.000346279	0.00339917
CACATCATCCTCGCCGCAGCCAT	23H-RNA	Y57G11C.1145_hairpin	17.9611	10.448	0	0	7.51496	2.10034	3.57797	0.000346279	0.00339917
CATCGTAAGGCACCCGACACACT	23H-RNA	Y41C4A.17	17.9611	10.448	0	0	7.51496	2.10034	3.57797	0.000346279	0.00339917
TCCCGGATGTCTGTCACTCTCT	23H-RNA	Unknown_RE2	17.9611	10.448	0	0	7.51496	2.10034	3.57797	0.000346279	0.00339917
TTTCTGAGATGTCTTCACAATT	23H-RNA	F43E2.6	120.596	108.66	0	1.24112	7.5083	0.996467	7.53492	4.88631e-14	1.45363e-12
ATTCGGGAATTAGTTGTCGAC	23H-RNA	T05E12.8	259.153	267.47	0.855345	2.06853	7.48485	0.657155	11.3898	4.70159e-30	2.58303e-28
AAACCACGAATCCTAACCACT	23H-RNA	tRNA	12.8294	14.6272	0	0	7.47246	2.10521	3.5495	0.000385961	0.00375623
AGGATCAGAACATCAGGAAGAGC	23H-RNA	Unknown_IR1	12.8294	14.6272	0	0	7.47246	2.10521	3.5495	0.000385961	0.00375623
CGTATATTCTCTATTAGTGCTGT	23H-RNA	other, ZK792.4	12.8294	14.6272	0	0	7.47246	2.10521	3.5495	0.000385961	0.00375623
AAAAGTTTATGTTGACGGGGAA	23H-RNA	TC5	28.2246	45.9713	0.427673	0	7.46572	1.70355	4.38244	1.17358e-05	0.000147374
TCATGCGTCTCGGTGGTCCGA	23H-RNA	Y37E3.30	64.1468	10.448	0	0.413706	7.4623	1.82453	4.08998	4.31413e-05	0.000496554
CCACGGCGGCCGACAATTTCCGA	23H-RNA	Unknown_hairpin_RE2	10.2635	16.7169	0	0	7.45067	2.12727	3.50246	0.000460975	0.00439831
TAGCCTGAGTCTCAACCAAAAC	23H-RNA	hpo-13, Y105E8A.10	10.2635	16.7169	0	0	7.45067	2.12727	3.50246	0.000460975	0.00439831
TCTGCAACTGCCGCACGGTTTT	23H-RNA	DNA-8-1	10.2635	16.7169	0	0	7.45067	2.12727	3.50246	0.000460975	0.00439831
TCACGAGGGACGAGGAAAAGTG	23H-RNA	PAL5A	23.0928	4.17921	0	0	7.44947	2.23491	3.33322	0.000858457	0.00774601
CAATGGAGCGGTGTAAACTTTTC	23H-RNA	E01G4.7	210.401	593.448	1.71069	2.89594	7.44667	0.657707	11.3222	1.01911e-29	5.46671e-28
CGACGACGAACGATCGGGATGGA	23H-RNA	ChrX_intergenic1	69.2785	292.545	0	2.06853	7.44656	1.98956	3.74281	0.000181973	0.00189265
TGAGGTGTTGGTGCTGATGGCA	23H-RNA	C36A4.14	46.1857	27.1649	0	0.413706	7.44239	1.70869	4.35561	1.32695e-05	0.000164361
TACAACGTGGAGCTAAGACACCC	23H-RNA	F55C9.3	1477.94	2306.93	9.83647	11.9975	7.43741	0.331938	22.406	3.438e-111	9.36856e-109
CGATGTTTCTGAGATGTCTTCAC	23H-RNA	F43E2.6	112.898	177.617	1.71069	0	7.43042	0.901494	8.24233	1.68886e-16	6.07141e-15
AGAAGACCATTAGACAGCACCC	23H-RNA	K06C4.23, other	7.69761	18.8065	0	0	7.42821	2.16539	3.43042	0.000602644	0.00559334
ATAGAGCGAGAATTAACAAGA	23H-RNA	DNA-8-1	7.69761	18.8065	0	0	7.42821	2.16539	3.43042	0.000602644	0.00559334
CCAAAGGATCACGAGGCTCTTCC	23H-RNA	Unknown_IR1	7.69761	18.8065	0	0	7.42821	2.16539	3.43042	0.000602644	0.00559334
TGCCTCTTCATCAACTTCTTCC	23H-RNA	Y57G11C.1145_hairpin	7.69761	18.8065	0	0	7.42821	2.16539	3.43042	0.000602644	0.00559334
ATACAATGAAAACAACACTTTTG	23H-RNA	F23B2.9	20.527	6.26882	0	0	7.42599	2.18544	3.39794	0.000678946	0.0062252
MIMAT0020002	miRNA	miR-4814-5p	20.527	6.26882	0	0	7.42599	2.18544	3.39794	0.000678946	0.0062252
WBGene00003326	pre-miRNA	mir-233, W03G11.5	192.44	376.129	1.28302	2.06853	7.4062	0.675661	10.9614	5.85808e-28	3.02335e-26
AAAGAACAAGCCGTGGGCAAGCA	23H-RNA	F39E9.7, F55A4.4	5.13174	20.8961	0	0	7.40475	2.22689	3.32516	0.000883685	0.00793162
ATTAGATACCGTACCCCGAAAACT	23H-RNA	ChrIII_hairpin2	5.13174	20.8961	0	0	7.40475	2.22689	3.32516	0.000883685	0.00793162
CCTCGAGAGCGCGACAAAAACT	23H-RNA	W03D2.15	5.13174	20.8961	0	0	7.40475	2.22689	3.32516	0.000883685	0.00793162
CGGCCCTTACCGTTTAATACATGT	23H-RNA	mir-5592	5.13174	20.8961	0	0	7.40475	2.22689	3.32516	0.000883685	0.00793162
TAAAGACGTGGTTTTGACGAAAA	23H-RNA	other, Y54G11A.1	5.13174	20.8961	0	0	7.40475	2.22689	3.32516	0.000883685	0.00793162
TTCTTACTGTAGTCTTCGCTAAG	23H-RNA	fbxa-16, other, Y73B3A.14	5.13174	20.8961	0	0	7.40475	2.22689	3.32516	0.000883685	0.00793162
ACCACTTCCGCAGACGCTACAA	23H-RNA	Y37E3.30	17.9611	8.35843	0	0	7.40285	2.15798	3.43045	0.000602581	0.00559334
CGGAGAAATGACGAGAAATGC	23H-RNA	K07C5.13	17.9611	8.35843	0	0	7.40285	2.15798	3.43045	0.000602581	0.00559334
GGGATAAGAGCTCGTCCGATGGCG	23H-RNA	T05E12.8	17.9611	8.35843	0	0	7.40285	2.15798	3.43045	0.000602581	0.00559334
TTATCTAATCTCCATGTCACCC	23H-RNA	Y37E11B.2	17.9611	8.35843	0	0	7.40285	2.15798	3.43045	0.000602581	0.00559334
TTCCCGCATTTTTTGTAGATCA	23H-RNA	CELE14B	17.9611	8.35843	0	0	7.40285	2.15798	3.43045	0.000602581	0.00559334
TCTGAGATGTCTTCACAATTCT	23H-RNA	F43E2.6	87.2396	125.376	0.427673	0.827412	7.40161	1.00309	7.37878	1.59745e-13	4.64079e-12
AATACCACGGGCGATGCCAAATC	23H-RNA	T05E12.8	28.2246	41.7921	0.427673	0	7.38115	1.71206	4.31128	1.62315e-05	0.000199058
ATCACATAACTCCGCCCCCTGA	23H-RNA	other	15.3952	10.448	0	0	7.37983	2.14683	3.43755	0.000587012	0.00548939
TTTTTCAGCGGTCTCGTTATGA	23H-RNA	PAL5A	2.56587	22.9857	0	0	7.37982	2.33184	3.1648	0.00155188	0.0131006
TTTTTTCTGTATTCTTATTTTTC	23H-RNA	F52G3.8	559.36	1046.89	4.7044	4.96447	7.37798	0.455754	16.1885	6.07919e-59	6.78926e-57
CGGGATGATGGATCGGGATGAA	23H-RNA	T05E12.10	146.255	271.649	1.71069	0.827412	7.37396	0.756402	9.74873	1.86786e-22	8.31688e-21
MIMAT0006776	miRNA	miR-58b-3p	25.6587	0	0	0	7.36278	2.68451	2.74269	0.00609373	0.0435609
TCTCTGTGTGCTGGTAAGTGGA	23H-RNA	Y57G11C.51	12.8294	12.5376	0	0	7.35667	2.15025	3.42131	0.000623194	0.00574883
TCTTACTGTAGTTTTCGCTAAGA	23H-RNA	PALTA4	12.8294	12.5376	0	0	7.35667	2.15025	3.42131	0.000623194	0.00574883
CCATCAGCACCAACACCTCACC	23H-RNA	C36A4.14	112.898	94.0323	0.855345	0.413706	7.35426	0.997456	7.37302	1.66811e-13	4.83573e-12
CTTTTTCAGCGGTCTCGTTATGA	23H-RNA	PAL5A	43.6198	91.9427	0.855345	0	7.33357	1.26753	5.78571	7.22073e-09	1.36642e-07
WBGene00045360	pre-miRNA	mir-800, R04A9.8	292.509	451.355	1.71069	2.89594	7.3335	0.568146	12.9078	4.06917e-38	2.85786e-36
TCCGCGCGCCGCTGCGTTTAACT	23H-RNA	PALTA3	23.0928	2.08961	0	0	7.33346	2.36753	3.09751	0.00195151	0.0161351
TCCGTGTCACATCTGTCCGAA	23H-RNA	PALTTAA3	23.0928	2.08961	0	0	7.33346	2.36753	3.09751	0.00195151	0.0161351
ATCGGACGAGCTCTTATCCCCTC	23H-RNA	T05E12.8	120.596	83.5843	0.855345	0.413706	7.33314	1.00821	7.27343	3.50478e-13	9.74544e-12
AGCGAAAACTACAGTAATTCTTT	23H-RNA	CELE1	10.2635	14.6272	0	0	7.33313	2.16873	3.38129	0.000721452	0.00657951
CAATGAAAACAACACTTTTGGT	23H-RNA	F23B2.9	10.2635	14.6272	0	0	7.33313	2.16873	3.38129	0.000721452	0.00657951
TTTGGAACAGAAGCAAGAGGA	23H-RNA	F19B2.5	10.2635	14.6272	0	0	7.33313	2.16873	3.38129	0.000721452	0.00657951
AACCGGACCCTGCCTCTTCATC	23H-RNA	Y57G11C.1145_hairpin	156.518	382.398	1.28302	2.06853	7.32955	0.713168	10.2775	8.90464e-25	4.25704e-23
CCGGTCGATGCAATTCTTTTT	23H-RNA	other	25.6587	41.7921	0.427673	0	7.3281	1.7253	4.24744	2.16226e-05	0.000261873
TTCTACATATCCAACGGAGGAAC	23H-RNA	Y17D7C.3	133.425	202.692	0.855345	1.24112	7.32505	0.798161	9.17741	4.416e-20	1.80685e-18
TCCGGTTCAGAGCAGATGACAAC	23H-RNA	Y17D7C.3	118.03	150.452	0.427673	1.24112	7.32275	0.877583	8.34423	7.16813e-17	2.6325e-15
TTTTCGGGGTACGGTATCTAAT	23H-RNA	ChrIII_hairpin2	20.527	45.9713	0.427673	0	7.3099	1.74913	4.17916	2.92588e-05	0.000346051
AATAAAAACAATGGACAACTG	23H-RNA	Y59H11AR.6	7.69761	16.7169	0	0	7.3089	2.20479	3.31501	0.000916413	0.00818226
GTTTGGCCAAGCGGACTGGAGCA	23H-RNA	F55A4.9, rncs-1	7.69761	16.7169	0	0	7.3089	2.20479	3.31501	0.000916413	0.00818226
TAAAGTCCATGGACGGCGAGATT	23H-RNA	other	7.69761	16.7169	0	0	7.3089	2.20479	3.31501	0.000916413	0.00818226
CCCGTCTAGGTGATCTTTCAACA	23H-RNA	Y37E3.30	20.527	4.17921	0	0	7.30709	2.27747	3.20843	0.00133464	0.0114946
GGCCCTTACCGTTTAATACATG	23H-RNA	mir-5592	30.7905	35.5233	0	0.413706	7.30406	1.71791	4.25172	2.12137e-05	0.000257609
AGTGGATGACGACGACGATGGC	23H-RNA	Y57G11C.1145_hairpin	25.6587	39.7025	0	0.413706	7.28631	1.7308	4.20979	2.55611e-05	0.000305768
AAGACATCTCAGAAACATCGG	23H-RNA	F43E2.6	112.898	148.362	0	1.65482	7.28619	0.901737	8.08016	6.46799e-16	2.23671e-14
TATTTTCCGACTTCTCATGAGCC	23H-RNA	other	12.8294	52.2402	0	0.413706	7.28589	1.80981	4.02577	5.67885e-05	0.000645863
TCCACGGCGGCCGACAATTTC	23H-RNA	Unknown_hairpin_RE2	5.13174	18.8065	0	0	7.28365	2.26543	3.21512	0.00130388	0.0112418
TCTACAGAAGGGACGCCGGAAA	23H-RNA	other	5.13174	18.8065	0	0	7.28365	2.26543	3.21512	0.00130388	0.0112418
TGGCGTGTACTGCAGAAAACCC	23H-RNA	Y105C5A.15	5.13174	18.8065	0	0	7.28365	2.26543	3.21512	0.00130388	0.0112418
WBGene00255564	pre-miRNA	C23G10.13, mir-8206	5.13174	18.8065	0	0	7.28365	2.26543	3.21512	0.00130388	0.0112418
ATCGACACAAGCGCTACAGTAG	23H-RNA	CELE1	17.9611	6.26882	0	0	7.28147	2.23151	3.26303	0.00110228	0.00964586
TCGACAACTAATTCCCGAATCT	23H-RNA	T05E12.8	23.0928	41.7921	0.427673	0	7.27297	1.74056	4.17852	2.93414e-05	0.000346727
WBGene00255561	pre-miRNA	C01B12.12, mir-8186.2	38.4881	89.8531	0.427673	0.413706	7.26059	1.26947	5.71939	1.06906e-08	1.99261e-07
TACTGTAGCGCTTGTGTCGATTT	23H-RNA	CELE1	2.56587	20.8961	0	0	7.25681	2.37188	3.05952	0.00221695	0.0179797
TTTTTCAGCGGTCTCGTTATG	23H-RNA	PAL5A	2.56587	20.8961	0	0	7.25681	2.37188	3.05952	0.00221695	0.0179797
AGTGTAGTCAGCTGAAGAGACA	23H-RNA	rft-2, Y47D7A.14_IR, Y47D7A.14_IR_element	15.3952	8.35843	0	0	7.25613	2.20931	3.28434	0.00102222	0.00901476
CCGATTATTCTGGAACAAGTAT	23H-RNA	MTCE.7	15.3952	8.35843	0	0	7.25613	2.20931	3.28434	0.00102222	0.00901476
CGGAAACTGAAGCCCCAAAATC	23H-RNA	other	15.3952	8.35843	0	0	7.25613	2.20931	3.28434	0.00102222	0.00901476
TGGCCAAGCGGACTGGAGCACA	23H-RNA	F55A4.9, rncs-1	15.3952	8.35843	0	0	7.25613	2.20931	3.28434	0.00102222	0.00901476
WBGene00023456	pre-miRNA	mir-360, Y23B4A.3	15.3952	8.35843	0	0	7.25613	2.20931	3.28434	0.00102222	0.00901476
TCCCGCATTTTTTGTAGATCAA	23H-RNA	CELE14B	53.8833	73.1362	0	0.827412	7.24592	1.24753	5.8082	6.31494e-09	1.21014e-07
CAATCAAAGGATAGTCTCAACA	23H-RNA	F31C3.10, F31C3.9, rrn-3.1, rrn-3.56	12.8294	10.448	0	0	7.23078	2.20534	3.27876	0.00104265	0.00914164
CGCCACGAGCGGTGGAGCCTGCA	23H-RNA	T05E12.8	12.8294	10.448	0	0	7.23078	2.20534	3.27876	0.00104265	0.00914164
CTTCTGATCCTAGATGAACAATG	23H-RNA	24F12A.4, H15N14.4, Y24F12A.3	12.8294	10.448	0	0	7.23078	2.20534	3.27876	0.00104265	0.00914164
TCACGTCATTATGTCACAATCCC	23H-RNA	F39F10.4	12.8294	10.448	0	0	7.23078	2.20534	3.27876	0.00104265	0.00914164
TCAGGCCGCCGACATCTCACGGG	23H-RNA	PALTA3	12.8294	10.448	0	0	7.23078	2.20534	3.27876	0.00104265	0.00914164
TTCTTACTGTAGTTTTCGCTAAG	23H-RNA	PALTA4	10.2635	52.2402	0.427673	0	7.22291	1.84238	3.92042	8.8394e-05	0.00097362
WBGene00170514	piRNA	21ur-14275, Y51H4A.688	23.0928	0	0	0	7.21041	2.75328	2.61884	0.00882283	0.058927
WBGene00194804	pre-miRNA	F07A11.8, mir-2207	23.0928	0	0	0	7.21041	2.75328	2.61884	0.00882283	0.058927
MIMAT0032016	miRNA	miR-789-5p	3066.22	5650.3	31.6478	27.3046	7.20912	0.310712	23.2019	4.35204e-119	1.44626e-116
AAATCGGAAACTCAAAGACCAC	23H-RNA	Y17D7C.3	10.2635	12.5376	0	0	7.2051	2.21893	3.2471	0.00116587	0.0101179
AAGAGCCTCGTGATCCTTTGG	23H-RNA	Unknown_IR1	10.2635	12.5376	0	0	7.2051	2.21893	3.2471	0.00116587	0.0101179
ATCCTTGTACCAGTTATCTGCAA	23H-RNA	K02E2.11	10.2635	12.5376	0	0	7.2051	2.21893	3.2471	0.00116587	0.0101179
TAGGGGAAAAGATGTTGAATG	23H-RNA	other	10.2635	12.5376	0	0	7.2051	2.21893	3.2471	0.00116587	0.0101179
TTAAAGTTGATGGACGGCGAGATT	23H-RNA	PALTTAA1	10.2635	12.5376	0	0	7.2051	2.21893	3.2471	0.00116587	0.0101179
TTTCTCTTCCTCTTGCTTCTGT	23H-RNA	F19B2.5	10.2635	12.5376	0	0	7.2051	2.21893	3.2471	0.00116587	0.0101179
WBGene00255560	pre-miRNA	C01B12.11, mir-8186.1	33.3563	89.8531	0.427673	0.413706	7.20237	1.29128	5.57769	2.43737e-08	4.35698e-07
CGGCCCTTACCGTTTAATACA	23H-RNA	mir-5592	218.099	273.738	1.28302	2.06853	7.19486	0.638382	11.2705	1.83587e-29	9.77101e-28
TAAACATAGCGGCGCGCGGAACT	23H-RNA	PALTA3, talp-3, Y48A6C.4, Y57G11C.32	7.69761	14.6272	0	0	7.17877	2.25206	3.18764	0.00143439	0.0122453
TTTCTCTTCCTCTTGCTTCTGTT	23H-RNA	F19B2.5	7.69761	14.6272	0	0	7.17877	2.25206	3.18764	0.00143439	0.0122453
GGAGCTGGACGATGGATTCTT	23H-RNA	F55A4.9, rncs-1	7.69761	52.2402	0	0.413706	7.16866	1.88426	3.80449	0.000142094	0.00150621
WBGene00219253	pre-miRNA	mir-4916, T09B4.20	636.336	1901.54	10.2641	7.44671	7.16563	0.488206	14.6775	8.98683e-49	8.44452e-47
AAACCGTGCGGCAGTTGCAGAAA	23H-RNA	DNA-8-1	5.13174	16.7169	0	0	7.15136	2.31122	3.0942	0.00197345	0.0162271
CAAAATTTCCGCCCCATGCTTAC	23H-RNA	Y37E3.30	5.13174	16.7169	0	0	7.15136	2.31122	3.0942	0.00197345	0.0162271
CATGAGATGTCGGCGGCCTGAT	23H-RNA	PALTA3	5.13174	16.7169	0	0	7.15136	2.31122	3.0942	0.00197345	0.0162271
CTCTTCAGCTGACTACACTCTCT	23H-RNA	rft-2, Y47D7A.14_IR, Y47D7A.14_IR_element	5.13174	16.7169	0	0	7.15136	2.31122	3.0942	0.00197345	0.0162271
TCCGGCGTCCCTTTTGTAGAAAA	23H-RNA	mtd-1, other, ZK337.5	5.13174	16.7169	0	0	7.15136	2.31122	3.0942	0.00197345	0.0162271
TTCCCTTTATGTCGCACTTGCG	23H-RNA	T05E12.10	5.13174	16.7169	0	0	7.15136	2.31122	3.0942	0.00197345	0.0162271
WBGene00219228	pre-miRNA	mir-4933, W09H1.8	5.13174	16.7169	0	0	7.15136	2.31122	3.0942	0.00197345	0.0162271
TCATCTCAACCAAGATCTCAAC	23H-RNA	F52D2.6	17.9611	4.17921	0	0	7.14924	2.33084	3.06724	0.00216048	0.0175846
TGGACAAGTTCAGCGCGCGAACC	23H-RNA	F39E9.29_region	17.9611	4.17921	0	0	7.14924	2.33084	3.06724	0.00216048	0.0175846
WBGene00219269	pre-miRNA	C46F2.2, mir-5553	71.8444	162.989	0.855345	0.827412	7.13103	0.941482	7.57427	3.61165e-14	1.08389e-12
TCAAAATCGGACGACCGGACGC	23H-RNA	Unknown_hairpin_RE2	2.56587	18.8065	0	0	7.12225	2.41915	2.94412	0.0032388	0.0251588
TCCGAACAAAAGAGTAACTATT	23H-RNA	other	2.56587	18.8065	0	0	7.12225	2.41915	2.94412	0.0032388	0.0251588
TACGGGAAAAGCAGAGAGGCC	23H-RNA	F39E9.7	141.123	204.781	0	2.48224	7.10786	0.787196	9.02934	1.72712e-19	6.96213e-18
TAGCGAAAACTACAGTAAGAACT	23H-RNA	PALTA4	35.9222	79.4051	0.427673	0.413706	7.10625	1.28232	5.54173	2.99505e-08	5.27512e-07
ACGGCAACTCGGTCCAAAACCA	23H-RNA	PALNN1	12.8294	8.35843	0	0	7.09288	2.27415	3.11891	0.00181521	0.0151267
AGAGCTTATGCCCTATGTATGG	23H-RNA	F31C3.10, F31C3.9, rrn-3.1, rrn-3.56	12.8294	8.35843	0	0	7.09288	2.27415	3.11891	0.00181521	0.0151267
CGCATTTTTTGTAGATCAAACCC	23H-RNA	CELE14B	12.8294	8.35843	0	0	7.09288	2.27415	3.11891	0.00181521	0.0151267
TTTCGGGGTACGGTATCTAATA	23H-RNA	ChrIII_hairpin2	12.8294	8.35843	0	0	7.09288	2.27415	3.11891	0.00181521	0.0151267
CTCGCCGCAGCCATCGTCGTCG	23H-RNA	Y57G11C.1145_hairpin	12.8294	43.8817	0.427673	0	7.08202	1.8267	3.87694	0.000105779	0.0011451
TATCCACTGAGCTATCCATGC	23H-RNA	irld-17, Y46H3D.4	10.2635	10.448	0	0	7.06457	2.28073	3.0975	0.00195161	0.0161351
TCAACTTCTTCCACGCCATCATC	23H-RNA	Y57G11C.1145_hairpin	10.2635	10.448	0	0	7.06457	2.28073	3.0975	0.00195161	0.0161351
WBGene00171403	piRNA	21ur-10906, K02B2.28	10.2635	10.448	0	0	7.06457	2.28073	3.0975	0.00195161	0.0161351
TGTGATTTTGGATTAAACTCA	23H-RNA	Y59H11AR.6	135.991	254.932	2.56604	0.413706	7.05164	0.751274	9.38624	6.21802e-21	2.63107e-19
TTGCCTCTGAATGCCGAGTAGG	23H-RNA	other	17.9611	37.6129	0.427673	0	7.0504	1.79002	3.93873	8.19137e-05	0.00090664
ATGATGGCGTGGAAGAAGTTGA	23H-RNA	Y57G11C.1145_hairpin	187.309	474.341	1.28302	3.72335	7.04291	0.654343	10.7633	5.12827e-27	2.60719e-25
CATAACGAGACCGCTGAAAAAGT	23H-RNA	PAL5A	7.69761	12.5376	0	0	7.03564	2.30966	3.04617	0.00231775	0.0187526
TAACGAGACCGCTGAAAAAGTTC	23H-RNA	PAL5A	7.69761	12.5376	0	0	7.03564	2.30966	3.04617	0.00231775	0.0187526
ATTCGGGAATTAGTTGTCGACAC	23H-RNA	T05E12.8	10.2635	43.8817	0.427673	0	7.01576	1.86148	3.76892	0.000163952	0.00171415
ACCATCCGGATGCTTCATGTTTC	23H-RNA	E01G4.7	5.13174	14.6272	0	0	7.00561	2.36681	2.95994	0.00307701	0.0240667
ATGTATTAAACGGTAAGGGCCGGC	23H-RNA	mir-5592	5.13174	14.6272	0	0	7.00561	2.36681	2.95994	0.00307701	0.0240667
CATCAGCACCAACACCTCACCC	23H-RNA	C36A4.14	5.13174	14.6272	0	0	7.00561	2.36681	2.95994	0.00307701	0.0240667
CTGCCTGCCCAGAGCTAAGTACC	23H-RNA	T25G12.8	5.13174	14.6272	0	0	7.00561	2.36681	2.95994	0.00307701	0.0240667
TATCAGGCCGCCGACATCTCATG	23H-RNA	PALTA3	5.13174	14.6272	0	0	7.00561	2.36681	2.95994	0.00307701	0.0240667
TATCCACGACGGCCGACAATTTCC	23H-RNA	Unknown_hairpin_RE2	5.13174	14.6272	0	0	7.00561	2.36681	2.95994	0.00307701	0.0240667
TCAGGCCGCCGACATCCTACGGG	23H-RNA	PALTA3	5.13174	14.6272	0	0	7.00561	2.36681	2.95994	0.00307701	0.0240667
TTTCAACACGGCGGGAGGAAAGC	23H-RNA	Y37E3.30	5.13174	14.6272	0	0	7.00561	2.36681	2.95994	0.00307701	0.0240667
WBGene00045359	pre-miRNA	F18E9.9, mir-799	17.9611	2.08961	0	0	7.00435	2.48166	2.82245	0.00476587	0.0350432
CTTAGGTCACTGGTTCGAATCC	23H-RNA	other	17.9611	35.5233	0.427673	0	6.99465	1.79677	3.89291	9.90486e-05	0.00108397
MIMAT0015114	miRNA	miR-238-5p	8644.42	37247.2	206.994	153.071	6.99386	0.919836	7.60338	2.88501e-14	8.77418e-13
WBGene00003330	pre-miRNA	F22F1.4, mir-237	3389.52	6034.78	41.0566	33.5102	6.98282	0.298949	23.3579	1.14664e-120	4.00588e-118
WBGene00003279	pre-miRNA	F36H1.7, mir-51	18949	14495.6	109.484	155.553	6.97881	0.22804	30.6035	1.10095e-205	1.00003e-202
CGTCGTCGTCATCCACTCCACT	23H-RNA	Y57G11C.1145_hairpin	2.56587	16.7169	0	0	6.97376	2.47577	2.81681	0.00485037	0.0355112
TGATCTACAAAAAATGCGGGAAC	23H-RNA	CELE14B	2.56587	16.7169	0	0	6.97376	2.47577	2.81681	0.00485037	0.0355112
WBGene00003319	pre-miRNA	C29E6.7, mir-124	2.56587	16.7169	0	0	6.97376	2.47577	2.81681	0.00485037	0.0355112
CAGCCGGCCCTTACCGTTTAATA	23H-RNA	mir-5592	15.3952	4.17921	0	0	6.9721	2.39687	2.90884	0.00362771	0.0276286
CGGATGTCTGTCACTCTCTAAC	23H-RNA	Unknown_RE2	15.3952	4.17921	0	0	6.9721	2.39687	2.90884	0.00362771	0.0276286
TCTGAGATGTCTTCACAATTC	23H-RNA	F43E2.6	15.3952	4.17921	0	0	6.9721	2.39687	2.90884	0.00362771	0.0276286
AATTGTGAAGACATCTCAGAAAC	23H-RNA	F43E2.6	1298.33	2286.03	13.6855	14.8934	6.97146	0.34041	20.4796	3.2754e-93	6.37532e-91
TCTTCTCGGCTCTTCGAGCGCGTC	23H-RNA	ChrIII_hairpin1	12.8294	39.7025	0.427673	0	6.97125	1.83791	3.79303	0.00014882	0.00156819
AAACGGAATCGCTGTCCCGGAC	23H-RNA	F39E9.7	12.8294	6.26882	0	0	6.94049	2.36279	2.93741	0.00330962	0.0255198
ACCTCCATGTCGTAGGAATGCT	23H-RNA	C40A11.10, mir-8199	12.8294	6.26882	0	0	6.94049	2.36279	2.93741	0.00330962	0.0255198
ATAGAGCGAGAATTAACAAGAA	23H-RNA	DNA-8-1	12.8294	6.26882	0	0	6.94049	2.36279	2.93741	0.00330962	0.0255198
CACCGTCCTGCTGTCAATATCA	23H-RNA	F31C3.9, rrn-3.1	12.8294	6.26882	0	0	6.94049	2.36279	2.93741	0.00330962	0.0255198
CTCGTAGAACGTGTCGCTTCGTC	23H-RNA	F55A4.9, rncs-1	12.8294	6.26882	0	0	6.94049	2.36279	2.93741	0.00330962	0.0255198
TACGTTTACATGGAGGTCCCGC	23H-RNA	F39E9.29_region, F39E9.7	12.8294	6.26882	0	0	6.94049	2.36279	2.93741	0.00330962	0.0255198
TCTCGCCGTCCATCGACTTTAA	23H-RNA	PALTTAA1	12.8294	6.26882	0	0	6.94049	2.36279	2.93741	0.00330962	0.0255198
TGTTTGATACCTGGACTCTTTCC	23H-RNA	E01G4.7	618.375	1032.27	8.12578	5.37818	6.93831	0.409292	16.952	1.86103e-64	2.41491e-62
WBGene00045863	piRNA	21ur-1894, T23G4.8	0	18.8065	0	0	6.93684	2.87367	2.41392	0.0157817	0.0940621
AGACGCAGGGCTGGTCGCGATG	23H-RNA	Y57G11C.51	51.3174	50.1506	0	0.827412	6.91921	1.28712	5.37574	7.62688e-08	1.26265e-06
TAAACGGTAAGGGCCGGCTGG	23H-RNA	mir-5592, R07C3.18, R07C3.19	38.4881	12.5376	0	0.413706	6.91501	1.84616	3.74561	0.000179953	0.00187308
AAAAGAGTTGATATATGTGGGC	23H-RNA	Y59H11AR.6	10.2635	8.35843	0	0	6.90885	2.35848	2.92937	0.0033965	0.0261159
CGAAGAGCCGAGAAGAGAGATCA	23H-RNA	ChrIII_hairpin1	10.2635	8.35843	0	0	6.90885	2.35848	2.92937	0.0033965	0.0261159
TGCGGAGAAATGACGAGAAAT	23H-RNA	other	10.2635	8.35843	0	0	6.90885	2.35848	2.92937	0.0033965	0.0261159
TTCTGTGGGCGGGGCCAATCCC	23H-RNA	DNA-8-1	10.2635	8.35843	0	0	6.90885	2.35848	2.92937	0.0033965	0.0261159
AACGAGACCGCTGAAAAAGTTT	23H-RNA	PAL5A	23.0928	27.1649	0	0.413706	6.90472	1.79295	3.85104	0.000117616	0.00126582
TACATAGATGCCGAGTACAACCC	23H-RNA	E01G4.5	118.03	131.645	0.427673	1.65482	6.89581	0.82493	8.35928	6.31044e-17	2.33007e-15
CAATAAAAACAATGGACAACTGC	23H-RNA	Y59H11AR.6	182.177	119.108	1.28302	1.24112	6.89554	0.76399	9.0257	1.78556e-19	7.17647e-18
TTCTGGAATGAAACGAGTGCTGC	23H-RNA	Y116A8B.1	97.5031	200.602	0.855345	1.65482	6.89172	0.803641	8.57562	9.8552e-18	3.75076e-16
TCATCTAAACAACCGTACTGGA	23H-RNA	F31C3.9, rrn-3.1	30.7905	18.8065	0	0.413706	6.87847	1.80804	3.80437	0.000142164	0.00150621
AAGCGGACTGGAGCACATTGGA	23H-RNA	F55A4.9, rncs-1	7.69761	10.448	0	0	6.87666	2.38106	2.88806	0.0038762	0.0291464
ACCGGACCCTGCCTCTTCATC	23H-RNA	Y57G11C.1145_hairpin	7.69761	10.448	0	0	6.87666	2.38106	2.88806	0.0038762	0.0291464
AGGCACATTTTAAGTCGGTAGGC	23H-RNA	gmps-1, M106.4	7.69761	10.448	0	0	6.87666	2.38106	2.88806	0.0038762	0.0291464
CAGCCATCGTCGTCGTCATCCAC	23H-RNA	Y57G11C.1145_hairpin	7.69761	10.448	0	0	6.87666	2.38106	2.88806	0.0038762	0.0291464
CTTCAAGTTCTATTGCCGGATAT	23H-RNA	F39E9.10	7.69761	10.448	0	0	6.87666	2.38106	2.88806	0.0038762	0.0291464
GACGGGCGGTGTGTACAAAGGG	23H-RNA	F31C3.7, F31C3.8, rrn-1.1, rrn-1.2	7.69761	10.448	0	0	6.87666	2.38106	2.88806	0.0038762	0.0291464
GGCCCTTACCGTTTAATACATGT	23H-RNA	mir-5592	7.69761	10.448	0	0	6.87666	2.38106	2.88806	0.0038762	0.0291464
TTGCCTCTGAATGCCGAGTAGGC	23H-RNA	gopc-1, other, ZK849.2	7.69761	10.448	0	0	6.87666	2.38106	2.88806	0.0038762	0.0291464
TTTTAAAACCGTGCGGCAGTTGC	23H-RNA	DNA-8-1	7.69761	10.448	0	0	6.87666	2.38106	2.88806	0.0038762	0.0291464
MIMAT0000022	miRNA	miR-51-5p	1.59922e+06	1.22985e+06	10399.7	13678.4	6.87645	0.207621	33.1203	1.51843e-240	1.59143e-237
TTCTGAGATGTCTTCACAATTC	23H-RNA	F43E2.6	82.1079	165.079	2.13836	0	6.87362	0.912096	7.53608	4.84322e-14	1.44396e-12
ATCATCCTCGCCGCAGCCATCGT	23H-RNA	Y57G11C.1145_hairpin	28.2246	20.8961	0	0.413706	6.86651	1.80305	3.80827	0.00013994	0.00148727
AAATTGTCGGCCGCCGTGGAAAC	23H-RNA	Unknown_hairpin_RE2	33.3563	112.839	0.855345	0.413706	6.86187	1.14749	5.97988	2.23303e-09	4.56832e-08
GAAGAATGCTGGAACACGTCGT	23H-RNA	Y37E3.30	25.6587	22.9857	0	0.413706	6.85458	1.80192	3.80403	0.000142359	0.0015071
TATTCCTGATGCGGCGCCGGCT	23H-RNA	T05E12.8	51.3174	45.9713	0.427673	0.413706	6.8524	1.27448	5.37664	7.58886e-08	1.25942e-06
TAGGATAATGTCTGGAAATACGG	23H-RNA	B0281.4	25.6587	22.9857	0.427673	0	6.84959	1.80145	3.80226	0.000143381	0.00151557
WBGene00173733	piRNA	21ur-6681, Y57G11C.1054	17.9611	0	0	0	6.84701	2.94042	2.32858	0.0198811	0.113482
CGCGCGCCGCTATGTTTAACT	23H-RNA	PALTA3	102.635	91.9427	1.71069	0	6.84663	0.944702	7.24739	4.24872e-13	1.1766e-11
TCAACAGACTGATGGACGATG	23H-RNA	C36A4.14	220.665	311.351	2.99371	1.65482	6.8464	0.584017	11.7229	9.72381e-32	5.47466e-30
ACTTTTTCAGCGGTCTCGTTATA	23H-RNA	PAL5A	5.13174	12.5376	0	0	6.84336	2.43533	2.81003	0.00495372	0.0361126
ATGGATAGCTCAGTGGATAGT	23H-RNA	irld-17, Y46H3D.4	5.13174	12.5376	0	0	6.84336	2.43533	2.81003	0.00495372	0.0361126
TTTCGTCCATACATTGAGGGAGC	23H-RNA	F39E9.10	5.13174	12.5376	0	0	6.84336	2.43533	2.81003	0.00495372	0.0361126
AGAGGTCCAAGTAAGATGATAG	23H-RNA	F39E9.7	35.9222	12.5376	0	0.413706	6.84088	1.85498	3.68783	0.000226171	0.00231003
TCCGGTTCAGAGCAGATGACAA	23H-RNA	Y17D7C.3	10.2635	37.6129	0.427673	0	6.83793	1.88125	3.63478	0.000278222	0.00279762
AGTGGAGTGGATGACGACGACGG	23H-RNA	Y57G11C.51	751.8	3092.62	32.5031	1.24112	6.83234	1.85157	3.69003	0.000224225	0.00229187
TCAATGACGGAGTCGAGATCGA	23H-RNA	Y37E11B.2	53.8833	135.824	0	1.65482	6.83071	1.02963	6.63411	3.26472e-11	7.83131e-10
CTAATCGTCCCGATCCTTTCATC	23H-RNA	ChrX_intergenic1	12.8294	81.4947	0.855345	0	6.80977	1.47845	4.60601	4.1047e-06	5.54277e-05
ACAACCCTGAACCAGACGTACCA	23H-RNA	F31C3.11, rrn-2.1	2.56587	14.6272	0	0	6.8081	2.54441	2.67571	0.00745718	0.0510573
AGAGTGACAGACATCCGGGAC	23H-RNA	Unknown_RE2	2.56587	14.6272	0	0	6.8081	2.54441	2.67571	0.00745718	0.0510573
TTCACGGCGGCCGACAATTTCC	23H-RNA	other	2.56587	14.6272	0	0	6.8081	2.54441	2.67571	0.00745718	0.0510573
ATCGACACAAGCGCTACAGTAGC	23H-RNA	CELE1	15.3952	2.08961	0	0	6.80679	2.56132	2.65753	0.00787163	0.0534385
ATGACGACGACGATGGCTGCGGC	23H-RNA	Y57G11C.1145_hairpin	76.9761	202.692	1.71069	0.827412	6.79524	0.846462	8.02782	9.9222e-16	3.41389e-14
MIMAT0015117	miRNA	miR-243-5p	572.189	867.187	4.7044	8.27412	6.79131	0.406942	16.6887	1.58508e-62	1.92828e-60
TAGACGGTGTGGGTCAACGAGC	23H-RNA	T05E12.8	1216.22	1805.42	12.8302	14.4797	6.7904	0.313379	21.6684	4.07889e-104	1.01045e-101
GTGGAGTGGATGACGACGACG	23H-RNA	Y57G11C.1145_hairpin, Y57G11C.51	659.429	2428.12	14.9685	13.2386	6.77471	0.893523	7.58202	3.40218e-14	1.02578e-12
AATTGTCGGCCGCCGTGGAAAA	23H-RNA	other	12.8294	4.17921	0	0	6.77032	2.48234	2.72739	0.00638366	0.0448598
CAAAATTGGCGGAGCGATCGTTC	23H-RNA	other	12.8294	4.17921	0	0	6.77032	2.48234	2.72739	0.00638366	0.0448598
CATTTCTACAAGTCTCATGTTGA	23H-RNA	M01E5.3	12.8294	4.17921	0	0	6.77032	2.48234	2.72739	0.00638366	0.0448598
CCACGCCATCATCCACATCATCC	23H-RNA	Y57G11C.1145_hairpin	12.8294	4.17921	0	0	6.77032	2.48234	2.72739	0.00638366	0.0448598
CCCTACTCTTCGCATCTCATC	23H-RNA	Y67D8A.2	12.8294	4.17921	0	0	6.77032	2.48234	2.72739	0.00638366	0.0448598
CTTGAAAATACTAACCCGGTCA	23H-RNA	ZK1236.8	12.8294	4.17921	0	0	6.77032	2.48234	2.72739	0.00638366	0.0448598
MIMAT0011446	miRNA	miR-2215-3p	0	16.7169	0	0	6.76724	2.97081	2.27791	0.0227317	0.125698
MIMAT0020140	miRNA	miR-4934	0	16.7169	0	0	6.76724	2.97081	2.27791	0.0227317	0.125698
WBGene00014391	pre-miRNA	F54B11.12, mir-392	0	16.7169	0	0	6.76724	2.97081	2.27791	0.0227317	0.125698
WBGene00170011	piRNA	21ur-8068, Y41E3.348	0	16.7169	0	0	6.76724	2.97081	2.27791	0.0227317	0.125698
WBGene00255578	pre-miRNA	mir-8193, Y23H5B.14	0	16.7169	0	0	6.76724	2.97081	2.27791	0.0227317	0.125698
AAATCGGAAACTCAAAGACCACAC	23H-RNA	Y17D7C.3	20.527	25.0753	0.427673	0	6.7598	1.82335	3.70736	0.000209434	0.00215361
MIMAT0004223	miRNA	miR-788-5p	38.4881	52.2402	0.855345	0	6.75036	1.31968	5.11515	3.13498e-07	4.88719e-06
AAATCACCGTCTAATTTTGAGT	23H-RNA	other	10.2635	6.26882	0	0	6.73431	2.45936	2.73824	0.00617692	0.0438336
ATAAATCGACGTTTCTTTCACAA	23H-RNA	hcp-1, ZK1055.1	10.2635	6.26882	0	0	6.73431	2.45936	2.73824	0.00617692	0.0438336
ATAGCGGCGCGCGGAACCCATG	23H-RNA	PALTA3	10.2635	6.26882	0	0	6.73431	2.45936	2.73824	0.00617692	0.0438336
CAACCGGACCCTGCCTCTTCATC	23H-RNA	Y57G11C.1145_hairpin	10.2635	6.26882	0	0	6.73431	2.45936	2.73824	0.00617692	0.0438336
CGCATTTTTCGTAGATCAAACCG	23H-RNA	CELE14B	10.2635	6.26882	0	0	6.73431	2.45936	2.73824	0.00617692	0.0438336
TAGTTTGTAGCCTGAGCCTCAAC	23H-RNA	other	10.2635	6.26882	0	0	6.73431	2.45936	2.73824	0.00617692	0.0438336
TCGGGGACCAACCAATATCAGGT	23H-RNA	C34G6.1, H05C05.2, hpo-27	10.2635	6.26882	0	0	6.73431	2.45936	2.73824	0.00617692	0.0438336
TCTCGCCGTCCATGGACTTTAAA	23H-RNA	other	10.2635	6.26882	0	0	6.73431	2.45936	2.73824	0.00617692	0.0438336
TAAACATAGCGGCGCGCGGAACC	23H-RNA	PALTA3	76.9761	100.301	0	1.65482	6.72822	0.969498	6.93991	3.92363e-12	1.00867e-10
ACTTGATTTCTCTGAAAATAGCA	23H-RNA	ZK430.7	10.2635	33.4337	0	0.413706	6.71198	1.89894	3.53458	0.000408421	0.00395785
CGACGGATCAGTGTTGCCACT	23H-RNA	T05E12.8	35.9222	8.35843	0.427673	0	6.70264	1.92294	3.48562	0.000490995	0.00466188
AAAGAATCCATTGTCCAGCTCCA	23H-RNA	F55A4.9, rncs-1	33.3563	54.3298	0.855345	0	6.70248	1.33871	5.00667	5.53802e-07	8.38395e-06
AAATTGTCGGCCGCCGTGAAAAC	23H-RNA	other	7.69761	8.35843	0	0	6.69791	2.47193	2.70959	0.00673668	0.0467825
CTATCTACACTCTCTGTACCGT	23H-RNA	other	7.69761	8.35843	0	0	6.69791	2.47193	2.70959	0.00673668	0.0467825
GCAAGCTGCGTTCTTCATCGAT	23H-RNA	F31C3.11, rrn-2.1	7.69761	8.35843	0	0	6.69791	2.47193	2.70959	0.00673668	0.0467825
TACACGAGCTGCGTAAATCGAC	23H-RNA	other	7.69761	8.35843	0	0	6.69791	2.47193	2.70959	0.00673668	0.0467825
TCAAAGGATCCGGTGAGGCTA	23H-RNA	W04B5.8	7.69761	8.35843	0	0	6.69791	2.47193	2.70959	0.00673668	0.0467825
TGAGTGGCGAAAATCGGAAATT	23H-RNA	other	7.69761	8.35843	0	0	6.69791	2.47193	2.70959	0.00673668	0.0467825
TGCACAGACTGAGCATTTTCCCCC	23H-RNA	other	7.69761	8.35843	0	0	6.69791	2.47193	2.70959	0.00673668	0.0467825
TGTGAACAGCGAGACACTATTCC	23H-RNA	Y71A12B.2, Y71A12B.3	7.69761	8.35843	0	0	6.69791	2.47193	2.70959	0.00673668	0.0467825
TGTGGGCGGGGCCAATCCGGAA	23H-RNA	H15N14.4, H37A05.4, Y24F12A.3, Y24F12A.4	7.69761	8.35843	0	0	6.69791	2.47193	2.70959	0.00673668	0.0467825
TTCTAAGTCCCTTTGATGCTC	23H-RNA	K06B9.6	7.69761	8.35843	0	0	6.69791	2.47193	2.70959	0.00673668	0.0467825
TAATTGGAAAAGATTAGAGATG	23H-RNA	F55A4.9, rncs-1	23.0928	62.6882	0	0.827412	6.68692	1.3936	4.79829	1.60023e-06	2.27591e-05
TATTAAACGGTAAGGGCCGGCT	23H-RNA	mir-5592	1085.36	1389.59	17.9623	6.20559	6.68351	0.381732	17.5084	1.23662e-68	1.70191e-66
TCCCCGTCAACATAAACTTTTT	23H-RNA	TC5	64.1468	64.7778	0.427673	0.827412	6.67683	1.06987	6.24079	4.35378e-10	9.44591e-09
TTATCATTGCCCGTCGCCTTTA	23H-RNA	C02B8.2, F31A9.4, fbxc-37, fbxc-38	33.3563	52.2402	0.855345	0	6.6673	1.34232	4.967	6.79949e-07	1.01249e-05
CACTTACCAGCACACAGAGACGC	23H-RNA	Y57G11C.51	5.13174	10.448	0	0	6.6604	2.52149	2.64145	0.00825517	0.0555166
CCCCGAACGCAGATTTATTTTT	23H-RNA	T04D3.t1	5.13174	10.448	0	0	6.6604	2.52149	2.64145	0.00825517	0.0555166
CGCGTAGGTCTAAATTATTTTG	23H-RNA	other	5.13174	10.448	0	0	6.6604	2.52149	2.64145	0.00825517	0.0555166
CGGCGGCCGACAATTTCCGAGT	23H-RNA	Unknown_hairpin_RE2	5.13174	10.448	0	0	6.6604	2.52149	2.64145	0.00825517	0.0555166
CGTCCTGCTGTCAATATCAACCA	23H-RNA	F31C3.9, rrn-3.1	5.13174	10.448	0	0	6.6604	2.52149	2.64145	0.00825517	0.0555166
CTCGAACTCGCGACCTCTAGATC	23H-RNA	irld-17, Y46H3D.4	5.13174	10.448	0	0	6.6604	2.52149	2.64145	0.00825517	0.0555166
GAGTCGATGAAAGTGGTGGTAT	23H-RNA	F31C3.9, rrn-3.1	5.13174	10.448	0	0	6.6604	2.52149	2.64145	0.00825517	0.0555166
GCCGATGTTTCTGAGATGTCTTCA	23H-RNA	F43E2.6	5.13174	10.448	0	0	6.6604	2.52149	2.64145	0.00825517	0.0555166
GGAGGGATGCGAAATAAATATTTT	23H-RNA	Y57G11C.36, Y57G11C.51	5.13174	10.448	0	0	6.6604	2.52149	2.64145	0.00825517	0.0555166
TAAACATAGCGGCGCGCGGAACA	23H-RNA	PALTA3	5.13174	10.448	0	0	6.6604	2.52149	2.64145	0.00825517	0.0555166
TCCGCGCGCCGCTATGTTTAACTT	23H-RNA	PALTA3	5.13174	10.448	0	0	6.6604	2.52149	2.64145	0.00825517	0.0555166
TGGTTAGGATTCGTGGTTTTCA	23H-RNA	tRNA	5.13174	10.448	0	0	6.6604	2.52149	2.64145	0.00825517	0.0555166
TTAAACACAGCGGCGCGCGGAAC	23H-RNA	other	5.13174	10.448	0	0	6.6604	2.52149	2.64145	0.00825517	0.0555166
TTGATTGTGTCGGAAAAAGAAA	23H-RNA	K02E2.6	5.13174	10.448	0	0	6.6604	2.52149	2.64145	0.00825517	0.0555166
CAAACTGGATTGACGAGCATCG	23H-RNA	F55A4.9, rncs-1	23.0928	102.391	0	1.24112	6.65261	1.25718	5.29171	1.21179e-07	1.96322e-06
TTTGGCCAAGCGGACTGGAGCA	23H-RNA	F55A4.9, rncs-1	20.527	20.8961	0	0.413706	6.62445	1.8536	3.57383	0.0003518	0.0034484
WBGene00047588	piRNA	21ur-1378, Y105C5B.244	15.3952	0	0	0	6.62415	3.07272	2.15579	0.0310998	0.156822
WBGene00170026	piRNA	21ur-11902, D1046.9	15.3952	0	0	0	6.62415	3.07272	2.15579	0.0310998	0.156822
WBGene00171263	piRNA	21ur-11579, Y57G11C.897	15.3952	0	0	0	6.62415	3.07272	2.15579	0.0310998	0.156822
WBGene00173108	piRNA	21ur-11203, Y105C5B.1257	15.3952	0	0	0	6.62415	3.07272	2.15579	0.0310998	0.156822
TCCCGCATTTTTTGTAGATCAGA	23H-RNA	CELE14B	2.56587	12.5376	0	0	6.6208	2.63071	2.51673	0.0118449	0.0746817
CCGTCTAGGTGATCTTTCAACA	23H-RNA	Y37E3.30	71.8444	52.2402	1.28302	0	6.61007	1.11859	5.9093	3.43566e-09	6.85371e-08
ATTGTGAAGACATCTCAGAAAC	23H-RNA	F43E2.6	1044.31	1414.66	10.6918	14.4797	6.60955	0.313015	21.1157	5.70059e-99	1.23287e-96
CTTCTATCATTCTCGAATTCCC	23H-RNA	other	59.015	22.9857	0	0.827412	6.60601	1.39929	4.72098	2.34706e-06	3.26313e-05
TGGAGTGGATGACGACGACGA	23H-RNA	Y57G11C.1145_hairpin	869.83	3397.7	19.2453	24.8224	6.59763	0.9257	7.12718	1.0245e-12	2.74239e-11
TCTCAGAAACATCGGCAAATGG	23H-RNA	F43E2.6	69.2785	52.2402	0	1.24112	6.59331	1.12169	5.87803	4.15168e-09	8.15082e-08
AAACAACCCTGAACCAGACGTAC	23H-RNA	F31C3.11, rrn-2.1	215.533	309.262	2.56604	2.89594	6.58825	0.55593	11.8509	2.12983e-32	1.22962e-30
WBGene00047433	piRNA	21ur-3567, H04M03.22	0	14.6272	0	0	6.57495	3.09086	2.12722	0.0334014	0.16579
WBGene00168784	piRNA	21ur-15686, Y64G10A.233	0	14.6272	0	0	6.57495	3.09086	2.12722	0.0334014	0.16579
WBGene00169062	piRNA	21ur-13926, C52D10.85	0	14.6272	0	0	6.57495	3.09086	2.12722	0.0334014	0.16579
MIMAT0032798	miRNA	miR-8192-3p	25.6587	14.6272	0.427673	0	6.57211	1.87828	3.49901	0.00046699	0.00445258
AGCCAATATCGGACGATGAAGCC	23H-RNA	other	20.527	18.8065	0	0.413706	6.54863	1.87208	3.49805	0.000468678	0.00446555
AAATTCAAATTTAACTCCGTGA	23H-RNA	Y69A2AR.16_hairpin	10.2635	4.17921	0	0	6.53587	2.59656	2.51713	0.0118316	0.0746324
AAGAGCCTCGTGATCCTTTGGAG	23H-RNA	Unknown_IR1	10.2635	4.17921	0	0	6.53587	2.59656	2.51713	0.0118316	0.0746324
CTTCTACATCCGTAAGAGGAACC	23H-RNA	Y17D7C.3	10.2635	4.17921	0	0	6.53587	2.59656	2.51713	0.0118316	0.0746324
GATGGTCGACAACCGACGAACA	23H-RNA	F19G12.10	10.2635	4.17921	0	0	6.53587	2.59656	2.51713	0.0118316	0.0746324
GCGTGCAGCCCCGGACATCTAA	23H-RNA	F31C3.7, F31C3.8, rrn-1.1, rrn-1.2	10.2635	4.17921	0	0	6.53587	2.59656	2.51713	0.0118316	0.0746324
TGGAAATATGACGGCTGCTACGA	23H-RNA	F53H1.4	10.2635	4.17921	0	0	6.53587	2.59656	2.51713	0.0118316	0.0746324
TTTCTGTCATCACCCGCGGGGCC	23H-RNA	dnj-27_element	10.2635	4.17921	0	0	6.53587	2.59656	2.51713	0.0118316	0.0746324
TTTGATACCTGGACTCTTTCC	23H-RNA	E01G4.7	10.2635	4.17921	0	0	6.53587	2.59656	2.51713	0.0118316	0.0746324
TATCTACACTCTCTGTACCGG	23H-RNA	Unknown_RE2	5.13174	33.4337	0	0.413706	6.53456	2.01224	3.24741	0.00116461	0.0101179
WBGene00201935	pre-miRNA	C54G10.6, mir-8210	12.8294	25.0753	0	0.413706	6.50355	1.9072	3.41001	0.000649615	0.00597234
MIMAT0032815	miRNA	miR-8201-5p	135.991	131.645	2.13836	0.827412	6.5031	0.732898	8.87314	7.11141e-19	2.83313e-17
MIMAT0020778	miRNA	miR-1830-3p	2411.92	3531.44	35.9245	29.7868	6.50051	0.264008	24.6224	7.27795e-134	3.09882e-131
ATTGTCGGCCGCCGTGGAAAAC	23H-RNA	other	7.69761	6.26882	0	0	6.4938	2.59136	2.50594	0.0122126	0.0763636
CTCAACAGATCGCAGTATAAAA	23H-RNA	F31C3.10, F31C3.9, rrn-3.1, rrn-3.56	7.69761	6.26882	0	0	6.4938	2.59136	2.50594	0.0122126	0.0763636
GGGAGGAAAGCTGGGATTATCC	23H-RNA	Y37E3.30	7.69761	6.26882	0	0	6.4938	2.59136	2.50594	0.0122126	0.0763636
MIMAT0022182	miRNA	miR-5545-3p	7.69761	6.26882	0	0	6.4938	2.59136	2.50594	0.0122126	0.0763636
TACCGTACCCCGAAAACTAGAA	23H-RNA	ChrIII_hairpin2	7.69761	6.26882	0	0	6.4938	2.59136	2.50594	0.0122126	0.0763636
TACCTGATTTTCATAACGAGACC	23H-RNA	PAL5A	7.69761	6.26882	0	0	6.4938	2.59136	2.50594	0.0122126	0.0763636
TCGGCTCTTCGAGCGCGTCTTCTT	23H-RNA	ChrIII_hairpin1	7.69761	6.26882	0	0	6.4938	2.59136	2.50594	0.0122126	0.0763636
TTAGATACCGTACCCCGAAAAC	23H-RNA	ChrIII_hairpin2	7.69761	6.26882	0	0	6.4938	2.59136	2.50594	0.0122126	0.0763636
TTCTACAGAAGGGACGCCGGAAA	23H-RNA	other	7.69761	6.26882	0	0	6.4938	2.59136	2.50594	0.0122126	0.0763636
TTTTTGATTCAAAAACTCGGAT	23H-RNA	mdt-8, Y62F5A.1	7.69761	6.26882	0	0	6.4938	2.59136	2.50594	0.0122126	0.0763636
ATAACGAGACCGCTGAAAAAGT	23H-RNA	PAL5A	23.0928	14.6272	0	0.413706	6.48419	1.89727	3.41764	0.000631662	0.005823
MIMAT0015120	miRNA	miR-358-5p	1221.35	1218.24	16.6792	10.7564	6.47738	0.28732	22.5441	1.53512e-112	4.3575e-110
CGGCCCTTACCGTTTAATACAT	23H-RNA	mir-5592	197.572	171.348	2.56604	1.65482	6.45189	0.619942	10.4072	2.29795e-25	1.11422e-23
AAAAGAACTGAAGAGAGTGGGA	23H-RNA	other	5.13174	8.35843	0	0	6.45069	2.63278	2.45015	0.0142798	0.0863185
AAAGTAAATGCGTTCGGGGGGAA	23H-RNA	Y57G11B.t1	5.13174	8.35843	0	0	6.45069	2.63278	2.45015	0.0142798	0.0863185
AAATTGTCGGCCGCCGTGGAA	23H-RNA	Unknown_hairpin_RE2	5.13174	8.35843	0	0	6.45069	2.63278	2.45015	0.0142798	0.0863185
AAGCACGCCGTCTCTGAGGGAAC	23H-RNA	other	5.13174	8.35843	0	0	6.45069	2.63278	2.45015	0.0142798	0.0863185
AATTCTCGTTCTCTCCACACAC	23H-RNA	R119.7, rnp-8	5.13174	8.35843	0	0	6.45069	2.63278	2.45015	0.0142798	0.0863185
AGAGTGACAGACATCCGGGACCC	23H-RNA	Unknown_RE2	5.13174	8.35843	0	0	6.45069	2.63278	2.45015	0.0142798	0.0863185
AGCCAATATCGGACGATGAAGC	23H-RNA	other	5.13174	8.35843	0	0	6.45069	2.63278	2.45015	0.0142798	0.0863185
AGCCGGCCCTTACCGTTTAATAC	23H-RNA	mir-5592	5.13174	8.35843	0	0	6.45069	2.63278	2.45015	0.0142798	0.0863185
CAAAAATCGCCCGAAAATTCAC	23H-RNA	pde-2, R08D7.6	5.13174	8.35843	0	0	6.45069	2.63278	2.45015	0.0142798	0.0863185
CAGCACGACGTAGACGGAAAGGA	23H-RNA	H15N14.4	5.13174	8.35843	0	0	6.45069	2.63278	2.45015	0.0142798	0.0863185
CATATCCCATGAATTGTCCGCA	23H-RNA	linc-17, Y49F6A.9	5.13174	8.35843	0	0	6.45069	2.63278	2.45015	0.0142798	0.0863185
CGGCGGCCGACAATTTCCGAGC	23H-RNA	Unknown_hairpin_RE2	5.13174	8.35843	0	0	6.45069	2.63278	2.45015	0.0142798	0.0863185
CTATCTACACTCTCTGTACCGA	23H-RNA	other	5.13174	8.35843	0	0	6.45069	2.63278	2.45015	0.0142798	0.0863185
CTGTCAATCTATTTTTCGTCTGT	23H-RNA	CTGTCAATCTATTTTTCGTCTGT_Repeat	5.13174	8.35843	0	0	6.45069	2.63278	2.45015	0.0142798	0.0863185
TAACAGGGATGAAGTAACGCC	23H-RNA	other	5.13174	8.35843	0	0	6.45069	2.63278	2.45015	0.0142798	0.0863185
TACGTCACAACTGTATTAAAAT	23H-RNA	TC8	5.13174	8.35843	0	0	6.45069	2.63278	2.45015	0.0142798	0.0863185
TCCGTCAGTCTTTTGTGAACAA	23H-RNA	dnj-12, F39B2.10	5.13174	8.35843	0	0	6.45069	2.63278	2.45015	0.0142798	0.0863185
TCTTACTGTAGTTTTCGCTAAG	23H-RNA	PALTA4	5.13174	8.35843	0	0	6.45069	2.63278	2.45015	0.0142798	0.0863185
TGTAGATCACACCGTGATGGGAC	23H-RNA	CELE14B	5.13174	8.35843	0	0	6.45069	2.63278	2.45015	0.0142798	0.0863185
TTCGCTCTCGATTCCGCATGCCG	23H-RNA	dnj-27_element	5.13174	8.35843	0	0	6.45069	2.63278	2.45015	0.0142798	0.0863185
TTTTGGACCGAGTTGCCGTGACT	23H-RNA	PALNN1	5.13174	8.35843	0	0	6.45069	2.63278	2.45015	0.0142798	0.0863185
MIMAT0032799	miRNA	miR-8193-5p	123.162	415.832	2.56604	3.72335	6.42349	0.6768	9.49098	2.28876e-21	9.80642e-20
TTCATTCACATCGGCTGCCATCC	23H-RNA	T05E12.8	10.2635	25.0753	0	0.413706	6.40447	1.94883	3.28631	0.00101508	0.00898083
CACGGGGCGATCCAAGAACCT	23H-RNA	Y81B9A.5	20.527	14.6272	0.427673	0	6.3775	1.91866	3.32394	0.000887541	0.00796099
TAGAAGACCACTTCCGCAGACG	23H-RNA	Y37E3.30	56.4492	48.061	0.855345	0.413706	6.36802	1.11426	5.71503	1.09687e-08	2.04165e-07
TCTTTCATCGTACGACGCTGTT	23H-RNA	F52G3.8	33.3563	35.5233	0	0.827412	6.36288	1.39079	4.57502	4.76167e-06	6.36681e-05
WBGene00000034	WAGO Class 22G	abu-11, T01D1.6	12.8294	0	0	0	6.3606	3.24799	1.95832	0.0501927	0.223006
WBGene00003088	pre-miRNA	C32C4.6, lsy-6	12.8294	0	0	0	6.3606	3.24799	1.95832	0.0501927	0.223006
WBGene00048595	piRNA	21ur-2349, Y116A8C.133	12.8294	0	0	0	6.3606	3.24799	1.95832	0.0501927	0.223006
WBGene00050169	piRNA	21ur-2277, Y105C5A.450	12.8294	0	0	0	6.3606	3.24799	1.95832	0.0501927	0.223006
WBGene00165661	piRNA	21ur-13474, Y57G11C.536	12.8294	0	0	0	6.3606	3.24799	1.95832	0.0501927	0.223006
WBGene00165991	piRNA	21ur-11634, Y42G9A.7	12.8294	0	0	0	6.3606	3.24799	1.95832	0.0501927	0.223006
WBGene00170606	piRNA	21ur-8808, Y41E3.364	12.8294	0	0	0	6.3606	3.24799	1.95832	0.0501927	0.223006
WBGene00173524	piRNA	21ur-11841, F41H10.31	12.8294	0	0	0	6.3606	3.24799	1.95832	0.0501927	0.223006
GTGGAGTGGATGACGACGACGA	23H-RNA	Y57G11C.1145_hairpin	456.725	1989.31	14.9685	14.8934	6.35638	0.977471	6.50288	7.87977e-11	1.84154e-09
WBGene00002070	ALG target 22G	ile-1, K07A1.8	0	12.5376	0	0	6.35294	3.24323	1.95883	0.0501327	0.223006
WBGene00047765	piRNA	21ur-2775, Y40H7A.70	0	12.5376	0	0	6.35294	3.24323	1.95883	0.0501327	0.223006
WBGene00172871	piRNA	21ur-8784, AC7.65	0	12.5376	0	0	6.35294	3.24323	1.95883	0.0501327	0.223006
MIMAT0004228	miRNA	miR-793	39914.7	60561	557.685	678.064	6.34531	0.230873	27.484	2.72952e-166	1.43037e-163
CCCCATTGCCGAATGTTTGAAT	23H-RNA	Y37E3.30	12.8294	20.8961	0	0.413706	6.33349	1.94145	3.26224	0.00110535	0.00966649
TCCCGCAATTCTCGTAGATCAAA	23H-RNA	other	10.2635	2.08961	0	0	6.30627	2.80589	2.24751	0.0246072	0.132939
WBGene00050241	piRNA	21ur-2287, H32C10.23	10.2635	2.08961	0	0	6.30627	2.80589	2.24751	0.0246072	0.132939
TATTAAACGGTAAGGGCCGGC	23H-RNA	mir-5592	1585.71	2194.09	25.2327	22.7538	6.30115	0.268348	23.4812	6.34199e-122	2.3354e-119
GACCAAGTCGTATGCAAGTGAT	23H-RNA	F31C3.10, F31C3.9, rrn-3.1, rrn-3.56	38.4881	58.509	0	1.24112	6.27606	1.18881	5.27928	1.29689e-07	2.09348e-06
GAGTGGATGACGACGACGATGGC	23H-RNA	Y57G11C.1145_hairpin	125.728	328.068	2.56604	3.30965	6.27443	0.651047	9.63744	5.55553e-22	2.43389e-20
AGTGACAGACATCCGGGACCT	23H-RNA	Unknown_RE2	7.69761	4.17921	0	0	6.25603	2.75606	2.26992	0.0232123	0.12722
CCCGCCCACGATTTCATTTGC	23H-RNA	mir-5550_RE	7.69761	4.17921	0	0	6.25603	2.75606	2.26992	0.0232123	0.12722
CGGACTGGAGCACATTGGAAAAA	23H-RNA	F55A4.9, rncs-1	7.69761	4.17921	0	0	6.25603	2.75606	2.26992	0.0232123	0.12722
CTTCTTCCACGCCATCATCCAC	23H-RNA	Y57G11C.1145_hairpin	7.69761	4.17921	0	0	6.25603	2.75606	2.26992	0.0232123	0.12722
CTTTGCTCTGCGTCCGACACTTT	23H-RNA	VB0395L.1	7.69761	4.17921	0	0	6.25603	2.75606	2.26992	0.0232123	0.12722
TCAAAATTTGACGGTGATTTCAA	23H-RNA	PALTTAA1	7.69761	4.17921	0	0	6.25603	2.75606	2.26992	0.0232123	0.12722
TCACGGCAACTCGGTCCAAAACC	23H-RNA	PALNN1	7.69761	4.17921	0	0	6.25603	2.75606	2.26992	0.0232123	0.12722
TCCTCAGCCTCACTTAAACTCTT	23H-RNA	M4.2, puf-4	7.69761	4.17921	0	0	6.25603	2.75606	2.26992	0.0232123	0.12722
TTAGGTTTTCTGCAGTACACGC	23H-RNA	PALTA3	7.69761	4.17921	0	0	6.25603	2.75606	2.26992	0.0232123	0.12722
TTCCACGCCATCATCCACATC	23H-RNA	Y57G11C.1145_hairpin	7.69761	4.17921	0	0	6.25603	2.75606	2.26992	0.0232123	0.12722
TTCTACAAAAGGGACGCCGGAAA	23H-RNA	mtd-1, other, ZK337.5	7.69761	4.17921	0	0	6.25603	2.75606	2.26992	0.0232123	0.12722
AAACTGTATTACGGTGGAGTCT	23H-RNA	other	28.2246	4.17921	0.427673	0	6.2489	2.08221	3.00109	0.00269015	0.0214472
TGCAACTAAGACACCCCGAACT	23H-RNA	Y37E3.30	82.1079	45.9713	0.427673	1.24112	6.24844	1.0207	6.1217	9.25815e-10	1.95267e-08
WBGene00167160	piRNA	21ur-10438, Y105C5B.767	25.6587	6.26882	0	0.413706	6.23701	2.03522	3.06455	0.00218001	0.0177224
CGGAGCTGAAGGATCAGAACATC	23H-RNA	Unknown_IR1	10.2635	20.8961	0.427673	0	6.21451	1.9855	3.12994	0.00174843	0.0146509
MIMAT0000293	miRNA	miR-238-3p	818110	1.21982e+06	10688	16879.2	6.20801	0.265948	23.3429	1.62726e-120	5.54286e-118
AAAATTAGCCGCCTACACAACA	23H-RNA	T05E12.10	5.13174	6.26882	0	0	6.2051	2.78214	2.23034	0.0257252	0.136807
AAGGACGGAAAGAAGAGACGC	23H-RNA	F55G1.3, his-62	5.13174	6.26882	0	0	6.2051	2.78214	2.23034	0.0257252	0.136807
ACCGGTACAGAGAGTGTGGATA	23H-RNA	lin-29, other, W03C9.4	5.13174	6.26882	0	0	6.2051	2.78214	2.23034	0.0257252	0.136807
ACGTGTTCCAGCATTCTTCGA	23H-RNA	Y37E3.30	5.13174	6.26882	0	0	6.2051	2.78214	2.23034	0.0257252	0.136807
AGACCACTTCCGCAGACGCTACA	23H-RNA	Y37E3.30	5.13174	6.26882	0	0	6.2051	2.78214	2.23034	0.0257252	0.136807
AGAGTGTAGTCAGCTGAAGAGAC	23H-RNA	rft-2, Y47D7A.14_IR, Y47D7A.14_IR_element	5.13174	6.26882	0	0	6.2051	2.78214	2.23034	0.0257252	0.136807
ATTTTGGGGGGCAGAAATCGGAA	23H-RNA	PAL8C	5.13174	6.26882	0	0	6.2051	2.78214	2.23034	0.0257252	0.136807
CCCGCATTTTTTGTAGATCAGA	23H-RNA	CELE14B	5.13174	6.26882	0	0	6.2051	2.78214	2.23034	0.0257252	0.136807
CCTCATACCGCGTATCTATTC	23H-RNA	F47E1.18, linc-22	5.13174	6.26882	0	0	6.2051	2.78214	2.23034	0.0257252	0.136807
CTCCAGGTCCATCTACAAACAAC	23H-RNA	K02E2.11	5.13174	6.26882	0	0	6.2051	2.78214	2.23034	0.0257252	0.136807
CTCGAATCAGTTCAGTCCCGGAT	23H-RNA	F31C3.7, F31C3.8, rrn-1.1, rrn-1.2	5.13174	6.26882	0	0	6.2051	2.78214	2.23034	0.0257252	0.136807
CTCTTGCTTCTGTTCCAAATATG	23H-RNA	F19B2.5	5.13174	6.26882	0	0	6.2051	2.78214	2.23034	0.0257252	0.136807
GCGGAGATTCACTGGAGATTTG	23H-RNA	lin-5, T09A5.10	5.13174	6.26882	0	0	6.2051	2.78214	2.23034	0.0257252	0.136807
TCCATTGTATTTTCTCAGGACC	23H-RNA	F39E9.28	5.13174	6.26882	0	0	6.2051	2.78214	2.23034	0.0257252	0.136807
TCGGGGGATGTCCAATTGGGGG	23H-RNA	DNA-8-1	5.13174	6.26882	0	0	6.2051	2.78214	2.23034	0.0257252	0.136807
TGTCTTCCTTTTGTTTCTCTTCC	23H-RNA	F19B2.5	5.13174	6.26882	0	0	6.2051	2.78214	2.23034	0.0257252	0.136807
TTAGGATTCGTGGTTTTCACCC	23H-RNA	tRNA	5.13174	6.26882	0	0	6.2051	2.78214	2.23034	0.0257252	0.136807
TTCTGTCATCACCCGCGGGGC	23H-RNA	dnj-27_element	5.13174	6.26882	0	0	6.2051	2.78214	2.23034	0.0257252	0.136807
GTGGAGCCTGCACTGTTGATTTC	23H-RNA	T05E12.8	7.69761	22.9857	0.427673	0	6.1949	2.02139	3.06467	0.00217909	0.0177224
CGTCGTCGTCATCCACTCCACC	23H-RNA	Y57G11C.1145_hairpin	48.7516	133.735	0.855345	1.65482	6.18638	0.910683	6.79312	1.09731e-11	2.74328e-10
ATGTTTCTGAGATGTCTTCAC	23H-RNA	F43E2.6	84.6737	68.957	1.71069	0.413706	6.18415	0.912274	6.77883	1.21149e-11	2.99575e-10
CATTTGCCGATGTTTCTGAGA	23H-RNA	F43E2.6	53.8833	127.466	0.855345	1.65482	6.17681	0.890562	6.93586	4.0376e-12	1.03601e-10
AGCGAAAACTACAGTAATTCTT	23H-RNA	CELE1	2.56587	8.35843	0	0	6.15173	2.88709	2.13078	0.0331076	0.164632
CCTTACGATCCTTCTTATCTGA	23H-RNA	Unknown_IR1	2.56587	8.35843	0	0	6.15173	2.88709	2.13078	0.0331076	0.164632
TCACGCATTTTTTGTAGATCAAA	23H-RNA	other, Y57A10A.1	2.56587	8.35843	0	0	6.15173	2.88709	2.13078	0.0331076	0.164632
TCATGATTTATTGTTCCCGTAAT	23H-RNA	PALTA4	2.56587	8.35843	0	0	6.15173	2.88709	2.13078	0.0331076	0.164632
WBGene00166919	piRNA	21ur-11378, Y41E3.266	2.56587	8.35843	0	0	6.15173	2.88709	2.13078	0.0331076	0.164632
WBGene00173887	piRNA	21ur-6749, Y7A9D.57	2.56587	8.35843	0	0	6.15173	2.88709	2.13078	0.0331076	0.164632
ACGTGTTCCAGCATTCTTCGAC	23H-RNA	Y37E3.30	220.665	280.007	2.99371	4.13706	6.1334	0.513854	11.9361	7.67619e-33	4.5872e-31
MIMAT0004232	miRNA	miR-797-5p	0	29.2545	0.427673	0	6.12514	2.40526	2.54656	0.0108791	0.0697554
GTTTCCAGCAGTGTCGTATGTCC	23H-RNA	F31C3.9, rrn-3.1	10.2635	18.8065	0.427673	0	6.11328	2.00873	3.04335	0.0023396	0.0189069
MIMAT0022183	miRNA	miR-5546-5p	0	10.448	0	0	6.09033	3.44364	1.76857	0.0769656	0.299787
WBGene00010763	ALG target 22G	K10H10.7	0	10.448	0	0	6.09033	3.44364	1.76857	0.0769656	0.299787
WBGene00011835	ALG target 22G	pgap-1, T19B10.8	0	10.448	0	0	6.09033	3.44364	1.76857	0.0769656	0.299787
WBGene00012638	ALG target 22G	Y38H8A.4	0	10.448	0	0	6.09033	3.44364	1.76857	0.0769656	0.299787
WBGene00017955	ALG Class 26G	F31E8.5	0	10.448	0	0	6.09033	3.44364	1.76857	0.0769656	0.299787
WBGene00168868	piRNA	21ur-13285, C55C3.42	0	10.448	0	0	6.09033	3.44364	1.76857	0.0769656	0.299787
WBGene00173894	piRNA	21ur-6590, C55C3.66	0	10.448	0	0	6.09033	3.44364	1.76857	0.0769656	0.299787
WBGene00174230	piRNA	21ur-6291, Y51H4A.895	0	10.448	0	0	6.09033	3.44364	1.76857	0.0769656	0.299787
ACGATGGCTGCGGCGAGGATGA	23H-RNA	Y57G11C.1145_hairpin	33.3563	50.1506	0	1.24112	6.06067	1.23245	4.9176	8.76131e-07	1.28635e-05
CCAAAGGATCACGAGGCTCTTC	23H-RNA	Unknown_IR1	15.3952	12.5376	0.427673	0	6.04657	2.01068	3.00722	0.00263648	0.0210704
MIMAT0011437	miRNA	miR-2211-5p	10.2635	0	0	0	6.0381	3.4924	1.72892	0.0838227	0.316542
MIMAT0022191	miRNA	miR-5550-5p	10.2635	0	0	0	6.0381	3.4924	1.72892	0.0838227	0.316542
MIMAT0032805	miRNA	miR-8196a-5p	10.2635	0	0	0	6.0381	3.4924	1.72892	0.0838227	0.316542
WBGene00012402	ALG target 22G	sfxn-1.3, Y6E2A.9	10.2635	0	0	0	6.0381	3.4924	1.72892	0.0838227	0.316542
WBGene00049939	piRNA	21ur-5100, Y57G11C.410	10.2635	0	0	0	6.0381	3.4924	1.72892	0.0838227	0.316542
WBGene00166394	piRNA	21ur-11490, Y4C6B.41	10.2635	0	0	0	6.0381	3.4924	1.72892	0.0838227	0.316542
WBGene00166462	piRNA	21ur-10160, Y105C5B.724	10.2635	0	0	0	6.0381	3.4924	1.72892	0.0838227	0.316542
WBGene00169982	piRNA	21ur-14331, Y105C5B.1005	10.2635	0	0	0	6.0381	3.4924	1.72892	0.0838227	0.316542
WBGene00170297	piRNA	21ur-9461, Y73B6BL.175	10.2635	0	0	0	6.0381	3.4924	1.72892	0.0838227	0.316542
WBGene00170945	piRNA	21ur-14189, Y7A9C.25	10.2635	0	0	0	6.0381	3.4924	1.72892	0.0838227	0.316542
WBGene00171863	piRNA	21ur-6860, Y73F8A.941	10.2635	0	0	0	6.0381	3.4924	1.72892	0.0838227	0.316542
WBGene00172376	piRNA	21ur-7558, F36H12.58	10.2635	0	0	0	6.0381	3.4924	1.72892	0.0838227	0.316542
WBGene00173324	piRNA	21ur-9885, Y45F10D.123	10.2635	0	0	0	6.0381	3.4924	1.72892	0.0838227	0.316542
CGCGCGGTTTGGTCCAGTCTCC	23H-RNA	E01G4.5	38.4881	71.0466	1.28302	0.413706	6.02648	1.05775	5.69747	1.21595e-08	2.251e-07
ATTGTGAAGACATCTCAGAAA	23H-RNA	F43E2.6	84.6737	77.3154	0.855345	1.65482	6.00579	0.842592	7.12776	1.02017e-12	2.73619e-11
WBGene00003325	pre-miRNA	F13H10.7, mir-232	210.401	346.875	3.84905	4.96447	5.9845	0.510069	11.7327	8.66129e-32	4.89668e-30
CGTCGTCATCCACTCCACCGA	23H-RNA	Y57G11C.1145_hairpin	7.69761	18.8065	0.427673	0	5.98213	2.06923	2.89099	0.00384026	0.0290525
AATTCCACTTGGGGTAAATTCG	23H-RNA	C36A4.14	28.2246	25.0753	0.855345	0	5.97613	1.47671	4.04693	5.18933e-05	0.000592663
TCCGGTTCAGAGCAGATGACA	23H-RNA	Y17D7C.3	305.339	618.524	8.12578	6.61929	5.97371	0.463389	12.8914	5.03498e-38	3.50008e-36
ACCGGGTTAGTATTTTCAAGCA	23H-RNA	ZK1236.8	7.69761	2.08961	0	0	5.97158	3.01005	1.98388	0.0472694	0.21461
CGCATTTTTTGTAGATCAAACC	23H-RNA	CELE14B	7.69761	2.08961	0	0	5.97158	3.01005	1.98388	0.0472694	0.21461
GAATTGTGAAGACATCTCAGAAA	23H-RNA	F43E2.6	17.9611	60.5986	1.28302	0	5.95821	1.34053	4.44465	8.80332e-06	0.000112414
TACCACCACTTTCATCGACTCTT	23H-RNA	F31C3.9, rrn-3.1	17.9611	8.35843	0.427673	0	5.95438	2.0623	2.88725	0.00388628	0.0292061
GACGACGAACGATCGGGATGGA	23H-RNA	ChrX_intergenic1	123.162	238.215	4.7044	1.24112	5.93661	0.670927	8.84836	8.88126e-19	3.52791e-17
AGCAGAAACTATATGGAACAT	23H-RNA	F39E9.29_region	143.689	112.839	1.71069	2.48224	5.92958	0.671748	8.82708	1.0744e-18	4.24311e-17
WBGene00167360	piRNA	21ur-7479, Y45F10D.74	25.6587	0	0	0.413706	5.92237	2.49253	2.37605	0.0174992	0.102405
CCGCATTTTTTGTAGATCAAA	23H-RNA	CELE14B	28.2246	22.9857	0.855345	0	5.91726	1.49343	3.96221	7.42593e-05	0.000827973
AACAACCCTGAACCAGACGTA	23H-RNA	F31C3.11, rrn-2.1	5.13174	4.17921	0	0	5.90881	2.99414	1.97346	0.0484437	0.217621
ACCACTGAACCACCGATGCGA	23H-RNA	other	5.13174	4.17921	0	0	5.90881	2.99414	1.97346	0.0484437	0.217621
ACTGCTCTACTGAATACAACACC	23H-RNA	F31C3.10, F31C3.9, rrn-3.1, rrn-3.56	5.13174	4.17921	0	0	5.90881	2.99414	1.97346	0.0484437	0.217621
CAAGTTCAACAGGTAGATCAAA	23H-RNA	TIR54TA1	5.13174	4.17921	0	0	5.90881	2.99414	1.97346	0.0484437	0.217621
CGGCGGCCGACGATTTCTGAGTT	23H-RNA	F23D12.11	5.13174	4.17921	0	0	5.90881	2.99414	1.97346	0.0484437	0.217621
CGTCGCGGCCGAGCTTCCCAAA	23H-RNA	Y71H2B.5	5.13174	4.17921	0	0	5.90881	2.99414	1.97346	0.0484437	0.217621
CTCGACTTTCCAGTTCTACCAT	23H-RNA	T05E12.10	5.13174	4.17921	0	0	5.90881	2.99414	1.97346	0.0484437	0.217621
CTCTTCGAGCGCGTCTTCTTTA	23H-RNA	ChrIII_hairpin1	5.13174	4.17921	0	0	5.90881	2.99414	1.97346	0.0484437	0.217621
CTCTTGCTTCTGTTCCAAATA	23H-RNA	F19B2.5	5.13174	4.17921	0	0	5.90881	2.99414	1.97346	0.0484437	0.217621
CTTTTTTCGTTCTATGTGAGT	23H-RNA	F52D2.6	5.13174	4.17921	0	0	5.90881	2.99414	1.97346	0.0484437	0.217621
MIMAT0032845	miRNA	miR-8212-3p	5.13174	4.17921	0	0	5.90881	2.99414	1.97346	0.0484437	0.217621
TATGTTTAACTCGCAGCGGGCA	23H-RNA	other	5.13174	4.17921	0	0	5.90881	2.99414	1.97346	0.0484437	0.217621
TCATCAGCTCCATCAACACCACCA	23H-RNA	C36A4.14	5.13174	4.17921	0	0	5.90881	2.99414	1.97346	0.0484437	0.217621
TCCGATTTCTGCCCCCCAAAAT	23H-RNA	PAL8C	5.13174	4.17921	0	0	5.90881	2.99414	1.97346	0.0484437	0.217621
TTTCGAAACCGTGCGGCAGTTG	23H-RNA	DNA-8-1	5.13174	4.17921	0	0	5.90881	2.99414	1.97346	0.0484437	0.217621
TTTGATCTACGAAAAATGCGGGA	23H-RNA	CELE14B	5.13174	4.17921	0	0	5.90881	2.99414	1.97346	0.0484437	0.217621
WBGene00170173	piRNA	21ur-11895, Y105C5B.1023	5.13174	4.17921	0	0	5.90881	2.99414	1.97346	0.0484437	0.217621
ATGAACCACAAGCGAAATCGCCC	23H-RNA	Y37E3.30	10.2635	14.6272	0.427673	0	5.88638	2.06872	2.84542	0.00443531	0.0328609
MIMAT0011434	miRNA	miR-2209c-3p	10.2635	14.6272	0.427673	0	5.88638	2.06872	2.84542	0.00443531	0.0328609
TCAGGCCGCCGACATCTCATGGA	23H-RNA	Y105C5B.11	10.2635	14.6272	0.427673	0	5.88638	2.06872	2.84542	0.00443531	0.0328609
TTGATCTCTATGCGACCCCACAC	23H-RNA	T05E12.10	33.3563	16.7169	0.855345	0	5.87975	1.52939	3.84452	0.000120789	0.00129745
WBGene00003290	pre-miRNA	mir-62, T07C5.6	248.89	263.29	3.84905	4.96447	5.85946	0.475935	12.3115	7.8588e-35	5.00356e-33
TTTGATCTACAAAAAATGCGGG	23H-RNA	CELE14B	25.6587	22.9857	0.427673	0.413706	5.85226	1.45529	4.02137	5.78614e-05	0.000656968
CGCATTTTTTGTAGATCAACGT	23H-RNA	CELE14B	2.56587	6.26882	0	0	5.84357	3.09034	1.89092	0.0586352	0.248802
MIMAT0020128	miRNA	miR-4922	2.56587	6.26882	0	0	5.84357	3.09034	1.89092	0.0586352	0.248802
MIMAT0020128_1	miRNA	miR-4922	2.56587	6.26882	0	0	5.84357	3.09034	1.89092	0.0586352	0.248802
TAAACGCAGCGGCGCGCGGAACC	23H-RNA	PALTA3	2.56587	6.26882	0	0	5.84357	3.09034	1.89092	0.0586352	0.248802
TGTAGATCAAACCGTCATGGG	23H-RNA	CELE14B	2.56587	6.26882	0	0	5.84357	3.09034	1.89092	0.0586352	0.248802
TTCCGCGCGCCGCTATGTTTA	23H-RNA	PALTA3	2.56587	6.26882	0	0	5.84357	3.09034	1.89092	0.0586352	0.248802
TTTTCTGCAGTACACGCCACGC	23H-RNA	PALTA3	2.56587	6.26882	0	0	5.84357	3.09034	1.89092	0.0586352	0.248802
WBGene00172296	piRNA	21ur-8767, Y105C5A.1070	2.56587	6.26882	0	0	5.84357	3.09034	1.89092	0.0586352	0.248802
WBGene00048837	piRNA	21ur-3698, Y73F8A.316	17.9611	6.26882	0	0.413706	5.84077	2.12391	2.75001	0.00595928	0.0427118
ACATTTTCGGCCAGTGGGGCACA	23H-RNA	other	17.9611	29.2545	0	0.827412	5.8245	1.53852	3.78578	0.000153225	0.00161087
TCCTTCGATGTCGGCTCTTCCTAT	23H-RNA	F31C3.10, F31C3.9, rrn-3.1, rrn-3.56	679.956	271.649	10.2641	6.61929	5.81535	0.504688	11.5227	1.01434e-30	5.66411e-29
WBGene00003336	pre-miRNA	F36A4.16, mir-242	84.6737	81.4947	2.13836	0.827412	5.81444	0.813942	7.14355	9.09505e-13	2.45873e-11
AGTCAGTTGGATGGGAAAATG	23H-RNA	W04B5.8	12.8294	10.448	0.427673	0	5.78288	2.09745	2.7571	0.00583165	0.0418852
AGTCGGGTTGCTTGAAAGTGC	23H-RNA	F31C3.9, rrn-3.1	12.8294	10.448	0.427673	0	5.78288	2.09745	2.7571	0.00583165	0.0418852
TATCTCGATACCATGTCTCACCCA	23H-RNA	Y37E11B.2	12.8294	10.448	0.427673	0	5.78288	2.09745	2.7571	0.00583165	0.0418852
TTGTGTCGACAACTAATTCCCGA	23H-RNA	T05E12.8	105.201	102.391	1.71069	2.06853	5.77773	0.712715	8.10665	5.20333e-16	1.80856e-14
WBGene00018652	ALG Class 26G	F49F1.12	0	8.35843	0	0	5.76886	3.72234	1.54979	0.121191	0.398409
WBGene00044476	ALG target 22G	F56D6.14	0	8.35843	0	0	5.76886	3.72234	1.54979	0.121191	0.398409
WBGene00048338	piRNA	21ur-2359, Y73F8A.272	0	8.35843	0	0	5.76886	3.72234	1.54979	0.121191	0.398409
WBGene00165300	piRNA	21ur-11950, B0273.44	0	8.35843	0	0	5.76886	3.72234	1.54979	0.121191	0.398409
WBGene00167900	piRNA	21ur-12386, F54C9.13	0	8.35843	0	0	5.76886	3.72234	1.54979	0.121191	0.398409
WBGene00169679	piRNA	21ur-10755, Y40H7A.227	0	8.35843	0	0	5.76886	3.72234	1.54979	0.121191	0.398409
WBGene00169892	piRNA	21ur-14522, Y73F8A.810	0	8.35843	0	0	5.76886	3.72234	1.54979	0.121191	0.398409
WBGene00170402	piRNA	21ur-12319, Y105C5B.1040	0	8.35843	0	0	5.76886	3.72234	1.54979	0.121191	0.398409
WBGene00170944	piRNA	21ur-11738, Y45F10D.109	0	8.35843	0	0	5.76886	3.72234	1.54979	0.121191	0.398409
AATACGCCCATTTCTGCAACTG	23H-RNA	DNA-8-1	10.2635	12.5376	0	0.413706	5.76631	2.1085	2.73479	0.00624194	0.044272
GAAGACACTTTCCAATTACCC	23H-RNA	GAAGACACTTTCCAATTACCC_Repeat, Y116A8C.48	10.2635	12.5376	0.427673	0	5.75785	2.10815	2.73123	0.00630983	0.0446141
GCAGCCAAAGACTGATCGATTC	23H-RNA	F31C3.9, rrn-3.1	10.2635	12.5376	0.427673	0	5.75785	2.10815	2.73123	0.00630983	0.0446141
TGTTTCTGAGATGTCTTCACAAT	23H-RNA	F43E2.6	7.69761	14.6272	0	0.413706	5.74082	2.13627	2.68731	0.0072031	0.0495168
AAACCACGAATCCTAACCACTA	23H-RNA	tRNA	30.7905	35.5233	0	1.24112	5.72664	1.29867	4.4096	1.03562e-05	0.000130772
TCCTTCGATGTCGGCTCTTCC	23H-RNA	F31C3.10, F31C3.9, rrn-3.1, rrn-3.56	2968.71	1360.33	32.9308	48.8173	5.72506	0.368004	15.557	1.4257e-54	1.50583e-52
ACCTACGTACAACACCGGGCTC	23H-RNA	T05E12.8	5.13174	16.7169	0	0.413706	5.71428	2.18752	2.61222	0.00899551	0.0599041
AGAGGTCCAAGTAAGATGATA	23H-RNA	F39E9.7	30.7905	77.3154	2.13836	0	5.67766	1.14318	4.96654	6.81593e-07	1.01383e-05
MIMAT0011460	miRNA	miR-2219-3p	51.3174	77.3154	1.28302	1.24112	5.6761	0.895919	6.33551	2.36562e-10	5.29254e-09
CCTTTCGGAGTGATAGCGATAAC	23H-RNA	Y116A8B.1	74.4103	225.678	4.7044	1.24112	5.66822	0.773367	7.32928	2.31398e-13	6.59581e-12
TCTCGTTCCAATTCAACTCCAGA	23H-RNA	T05E12.10	12.8294	29.2545	0	0.827412	5.66226	1.61105	3.51463	0.000440359	0.00422982
ACGGAGTTAAATTTGAATTTTT	23H-RNA	Y69A2AR.16_hairpin	74.4103	94.0323	1.71069	1.65482	5.6482	0.775515	7.28315	3.26112e-13	9.08644e-12
AAACAACCCTGAACCAGACGTA	23H-RNA	F31C3.11, rrn-2.1, rrn-2.1_element	954.504	1197.34	24.3773	18.6168	5.64787	0.281173	20.0868	9.61938e-90	1.82033e-87
MIMAT0015091	miRNA	let-7-3p	23.0928	39.7025	0.427673	0.827412	5.64612	1.26411	4.46648	7.95164e-06	0.000102305
CTTTGAACGGCCCTTAAAACAC	23H-RNA	F31C3.9, rrn-3.1	12.8294	8.35843	0.427673	0	5.64416	2.15242	2.62224	0.00873532	0.0584858
MIMAT0000034	miRNA	miR-62	40625.4	46546	881.433	881.607	5.62777	0.152235	36.9676	3.7993e-299	1.03531e-295
AACAACCCTGAACCAGACGTAC	23H-RNA	F31C3.11, rrn-2.1, rrn-2.1_element	35.9222	87.7635	0.855345	1.65482	5.6262	0.964736	5.83185	5.48159e-09	1.05788e-07
ATTAGATACCGTACCCCGAAAAC	23H-RNA	ChrIII_hairpin2	10.2635	10.448	0	0.413706	5.62561	2.15697	2.60811	0.00910439	0.0603636
MIMAT0022311	miRNA	miR-356b-5p	7.69761	0	0	0	5.62238	3.86094	1.45622	0.145331	0.438472
MIMAT0032800	miRNA	miR-8193-3p	7.69761	0	0	0	5.62238	3.86094	1.45622	0.145331	0.438472
WBGene00003341	pre-miRNA	C39E6.7, mir-247	7.69761	0	0	0	5.62238	3.86094	1.45622	0.145331	0.438472
WBGene00047572	piRNA	21ur-2436, Y57G11C.217	7.69761	0	0	0	5.62238	3.86094	1.45622	0.145331	0.438472
WBGene00049025	piRNA	21ur-4265, Y73B6BR.5	7.69761	0	0	0	5.62238	3.86094	1.45622	0.145331	0.438472
WBGene00165596	piRNA	21ur-14818, C06E4.9	7.69761	0	0	0	5.62238	3.86094	1.45622	0.145331	0.438472
WBGene00165761	piRNA	21ur-14722, Y40H7A.166	7.69761	0	0	0	5.62238	3.86094	1.45622	0.145331	0.438472
WBGene00166433	piRNA	21ur-13668, Y41E3.257	7.69761	0	0	0	5.62238	3.86094	1.45622	0.145331	0.438472
WBGene00168360	piRNA	21ur-15314, Y9C9A.67	7.69761	0	0	0	5.62238	3.86094	1.45622	0.145331	0.438472
WBGene00170013	piRNA	21ur-11818, AC7.41	7.69761	0	0	0	5.62238	3.86094	1.45622	0.145331	0.438472
WBGene00170893	piRNA	21ur-7911, Y51H4A.704	7.69761	0	0	0	5.62238	3.86094	1.45622	0.145331	0.438472
WBGene00171743	piRNA	21ur-9464, C52D10.104	7.69761	0	0	0	5.62238	3.86094	1.45622	0.145331	0.438472
WBGene00172529	piRNA	21ur-7945, Y67A10A.290	7.69761	0	0	0	5.62238	3.86094	1.45622	0.145331	0.438472
WBGene00172822	piRNA	21ur-8710, Y105C5B.1232	7.69761	0	0	0	5.62238	3.86094	1.45622	0.145331	0.438472
WBGene00173496	piRNA	21ur-8206, H25K10.130	7.69761	0	0	0	5.62238	3.86094	1.45622	0.145331	0.438472
WBGene00174573	piRNA	21ur-9414, Y116A8C.451	7.69761	0	0	0	5.62238	3.86094	1.45622	0.145331	0.438472
WBGene00174632	piRNA	21ur-8811, Y67A10A.333	7.69761	0	0	0	5.62238	3.86094	1.45622	0.145331	0.438472
AATTTTGCCTTTTCCCCGTGAGT	23H-RNA	PALTA3	10.2635	10.448	0.427673	0	5.61666	2.15664	2.60436	0.0092047	0.0607332
CGGAATGGTTCAAAAATCGAGCC	23H-RNA	F52G3.8	10.2635	10.448	0.427673	0	5.61666	2.15664	2.60436	0.0092047	0.0607332
CAAGTTCAACAGGTAGATCAAAA	23H-RNA	TIR54TA1	7.69761	12.5376	0	0.413706	5.59765	2.18068	2.56693	0.0102603	0.0665378
WBGene00022650	ALG target 22G	ZK84.2	20.527	0	0.427673	0	5.58613	2.60428	2.14498	0.0319546	0.160067
WBGene00170596	piRNA	21ur-10080, Y45F10B.48	20.527	0	0.427673	0	5.58613	2.60428	2.14498	0.0319546	0.160067
TCTGCGGAAGTGGTCTTCTACC	23H-RNA	Y37E3.30	17.9611	41.7921	0	1.24112	5.58344	1.38703	4.02547	5.68605e-05	0.000646142
ATGTATGGAGGACGAACACAAC	23H-RNA	C36A4.14	28.2246	12.5376	0.855345	0	5.58067	1.62227	3.44004	0.000581618	0.00545274
WBGene00021537	ALG target 22G	Y42H9AR.2	5.13174	14.6272	0	0.413706	5.56863	2.2299	2.49725	0.0125159	0.0777963
TCCTGATCGCTCATCTAAACAACC	23H-RNA	F31C3.9, rrn-3.1	133.425	302.993	5.98742	3.30965	5.56045	0.595136	9.34315	9.35082e-21	3.89618e-19
MIMAT0020324	miRNA	miR-85-5p	33.3563	64.7778	0.427673	1.65482	5.55668	1.04997	5.29222	1.20841e-07	1.96007e-06
WBGene00219247	pre-miRNA	mir-4807, Y59E1B.6	2.56587	16.7169	0	0.413706	5.53777	2.32264	2.38425	0.0171138	0.100637
AGTTCAACAGGTAGATCAAAAA	23H-RNA	TIR54TA1	5.13174	2.08961	0	0	5.53557	3.3297	1.66248	0.0964156	NA
ATTTAAAGCCGATAGGTAACC	23H-RNA	PALTTAA3	5.13174	2.08961	0	0	5.53557	3.3297	1.66248	0.0964156	NA
TTCCCGCATTTTTTGTAGATC	23H-RNA	CELE14B	5.13174	2.08961	0	0	5.53557	3.3297	1.66248	0.0964156	NA
WBGene00170296	piRNA	21ur-11099, R05A10.89	5.13174	2.08961	0	0	5.53557	3.3297	1.66248	0.0964156	NA
WBGene00171191	piRNA	21ur-9841, F58F9.17	5.13174	2.08961	0	0	5.53557	3.3297	1.66248	0.0964156	NA
TTCTGAGATGTCTTCACAATTCT	23H-RNA	F43E2.6	141.123	267.47	5.98742	2.89594	5.53155	0.58241	9.4977	2.14571e-21	9.22249e-20
WBGene00166260	piRNA	21ur-12354, C27H2.62	2.56587	16.7169	0.427673	0	5.52707	2.32231	2.37999	0.0173131	0.10159
GACATCTCAGAAACATCGGCAA	23H-RNA	F43E2.6	69.2785	45.9713	0	2.48224	5.52205	1.05295	5.24437	1.5682e-07	2.5167e-06
TAATTCTGCAGCCACTTCCGAA	23H-RNA	W03D2.15	10.2635	8.35843	0	0.413706	5.46962	2.21794	2.46608	0.0136599	0.083814
WBGene00003334	pre-miRNA	C39D10.10, mir-240	10938.3	11409.3	253.61	253.188	5.46263	0.149999	36.4178	2.22463e-290	5.05176e-287
CGTCTGGTTCAGGGTTGTTTA	23H-RNA	F31C3.11, rrn-2.1	10.2635	8.35843	0.427673	0	5.46007	2.21763	2.46212	0.0138117	0.0845362
AAAATAAAATGTTCTAGCTCTC	23H-RNA	E01G4.5	2.56587	4.17921	0	0	5.45079	3.39642	1.60486	0.108524	NA
AGTGAGGCTCAGGATTTTGAGTG	23H-RNA	M4.2, puf-4	2.56587	4.17921	0	0	5.45079	3.39642	1.60486	0.108524	NA
ATGATTTATTGTTCCCGTAAT	23H-RNA	PALTA4	2.56587	4.17921	0	0	5.45079	3.39642	1.60486	0.108524	NA
CCGCATTTTTTGTAGATCAAAGC	23H-RNA	CELE14B	2.56587	4.17921	0	0	5.45079	3.39642	1.60486	0.108524	NA
CGGACGGGAGCCAAGTTTGCACC	23H-RNA	other	2.56587	4.17921	0	0	5.45079	3.39642	1.60486	0.108524	NA
CGTATTGCAAGCCACGGTTCTGT	23H-RNA	DNA-8-1	2.56587	4.17921	0	0	5.45079	3.39642	1.60486	0.108524	NA
TCCCGCATTTTTTGTAGATCACA	23H-RNA	CELE14B	2.56587	4.17921	0	0	5.45079	3.39642	1.60486	0.108524	NA
TCCGCGCGCCGCTACGTTTAACT	23H-RNA	other, Y105C5A.15	2.56587	4.17921	0	0	5.45079	3.39642	1.60486	0.108524	NA
TTTCACGGCGGCCGACAATTTCC	23H-RNA	other	2.56587	4.17921	0	0	5.45079	3.39642	1.60486	0.108524	NA
WBGene00169775	piRNA	21ur-13573, Y73F8A.802	2.56587	4.17921	0	0	5.45079	3.39642	1.60486	0.108524	NA
ATGACGACGACGATGGCTGCGG	23H-RNA	Y57G11C.1145_hairpin	35.9222	73.1362	1.28302	1.24112	5.44057	0.959804	5.66841	1.44125e-08	2.63585e-07
CACTTACCAGCACACAGAGACG	23H-RNA	Y57G11C.51	25.6587	10.448	0.427673	0.413706	5.41341	1.6003	3.38275	0.000717646	0.00655796
WBGene00173796	piRNA	21ur-13992, T27E7.74	17.9611	0	0	0.413706	5.40619	2.68004	2.01721	0.0436739	0.203508
WBGene00170706	piRNA	21ur-10717, T23G4.94	17.9611	0	0.427673	0	5.39231	2.67996	2.01209	0.0442106	0.205027
WBGene00050732	piRNA	21ur-450, Y105C5B.595	35.9222	0	0.855345	0	5.39044	2.16475	2.4901	0.0127706	0.0792558
GACTGGACCAAACCGCGCGCT	23H-RNA	E01G4.5	23.0928	29.2545	0.427673	0.827412	5.38057	1.30573	4.12072	3.77688e-05	0.000439453
AAACCACGAATCCTAACCACTAG	23H-RNA	tRNA	17.9611	16.7169	0	0.827412	5.37478	1.65782	3.24208	0.0011866	0.0102846
WBGene00165805	piRNA	21ur-9066, Y116A8C.217	2.56587	14.6272	0	0.413706	5.37236	2.37469	2.26234	0.0236763	0.129251
TGGAGTTGAATTGGAACGAGATC	23H-RNA	T05E12.10	0	6.26882	0	0	5.35436	4.1402	1.29326	0.195921	NA
WBGene00000230	ALG target 22G	atp-3, F27C1.7	0	6.26882	0	0	5.35436	4.1402	1.29326	0.195921	NA
WBGene00017328	ALG target 22G	F10C5.2, nemp-1	0	6.26882	0	0	5.35436	4.1402	1.29326	0.195921	NA
WBGene00020683	ALG target 22G	ribo-1, T22D1.4	0	6.26882	0	0	5.35436	4.1402	1.29326	0.195921	NA
WBGene00021016	ALG target 22G	W03G9.5	0	6.26882	0	0	5.35436	4.1402	1.29326	0.195921	NA
WBGene00022599	ALG target 22G	daf-41, ZC395.10	0	6.26882	0	0	5.35436	4.1402	1.29326	0.195921	NA
WBGene00046434	piRNA	21ur-755, B0513.16	0	6.26882	0	0	5.35436	4.1402	1.29326	0.195921	NA
WBGene00049357	piRNA	21ur-4868, K01G12.6	0	6.26882	0	0	5.35436	4.1402	1.29326	0.195921	NA
WBGene00050470	piRNA	21ur-3499, Y105C5B.560	0	6.26882	0	0	5.35436	4.1402	1.29326	0.195921	NA
WBGene00165378	piRNA	21ur-11769, Y57G11C.523	0	6.26882	0	0	5.35436	4.1402	1.29326	0.195921	NA
WBGene00165396	piRNA	21ur-7188, Y105C5B.642	0	6.26882	0	0	5.35436	4.1402	1.29326	0.195921	NA
WBGene00166412	piRNA	21ur-14959, C10G6.25	0	6.26882	0	0	5.35436	4.1402	1.29326	0.195921	NA
WBGene00168150	piRNA	21ur-15289, H16O14.33	0	6.26882	0	0	5.35436	4.1402	1.29326	0.195921	NA
WBGene00168171	piRNA	21ur-10672, Y41E3.303	0	6.26882	0	0	5.35436	4.1402	1.29326	0.195921	NA
WBGene00168747	piRNA	21ur-13597, Y67A10A.220	0	6.26882	0	0	5.35436	4.1402	1.29326	0.195921	NA
WBGene00169883	piRNA	21ur-13451, Y57G11C.804	0	6.26882	0	0	5.35436	4.1402	1.29326	0.195921	NA
WBGene00169970	piRNA	21ur-12839, Y105C5B.1004	0	6.26882	0	0	5.35436	4.1402	1.29326	0.195921	NA
WBGene00170416	piRNA	21ur-15319, Y73F8A.838	0	6.26882	0	0	5.35436	4.1402	1.29326	0.195921	NA
WBGene00170446	piRNA	21ur-12120, Y37A1B.252	0	6.26882	0	0	5.35436	4.1402	1.29326	0.195921	NA
WBGene00170948	piRNA	21ur-14462, Y73F8A.879	0	6.26882	0	0	5.35436	4.1402	1.29326	0.195921	NA
WBGene00171112	piRNA	21ur-9315, Y116A8B.70	0	6.26882	0	0	5.35436	4.1402	1.29326	0.195921	NA
WBGene00172619	piRNA	21ur-6599, C43G2.23	0	6.26882	0	0	5.35436	4.1402	1.29326	0.195921	NA
WBGene00174360	piRNA	21ur-13915, C52D10.121	0	6.26882	0	0	5.35436	4.1402	1.29326	0.195921	NA
WBGene00235085	pre-miRNA	F55F3.11, mir-5592.2	2553.04	3510.54	76.1257	72.3985	5.35232	0.227795	23.4962	4.46208e-122	1.68878e-119
CATCCCGATCGTTCGTCGTCGCC	23H-RNA	ChrX_intergenic1	51.3174	85.6739	2.13836	1.24112	5.34998	0.84471	6.33352	2.39637e-10	5.35106e-09
WBGene00077709	pre-miRNA	mir-1822, ZK84.8	1998.81	2357.08	69.283	38.4747	5.33873	0.284755	18.7485	1.99115e-78	3.34931e-76
TCCGCGCGCCGCTATGTTTAAC	23H-RNA	PALTA3	25.6587	75.2258	0.855345	1.65482	5.33386	1.03468	5.1551	2.53492e-07	3.99286e-06
WBGene00171833	piRNA	21ur-10947, Y57G11A.182	0	16.7169	0	0.413706	5.33301	2.69544	1.97853	0.0478692	0.21654
WBGene00173812	piRNA	21ur-8368, Y57G11C.1062	0	16.7169	0	0.413706	5.33301	2.69544	1.97853	0.0478692	0.21654
MIMAT0020333	miRNA	miR-237-3p	438.764	691.66	16.2516	11.9975	5.32643	0.370557	14.3741	7.52192e-47	6.40539e-45
GCCGATGTTTCTGAGATGTCTT	23H-RNA	F43E2.6	105.201	179.706	2.56604	4.55077	5.32442	0.623525	8.53922	1.3513e-17	5.08606e-16
WBGene00173185	piRNA	21ur-7009, Y51H4A.835	51.3174	0	1.28302	0	5.32182	4.59813	1.15739	0.247114	0.582009
TCGCGACCAGCCCTGCGTCTTGC	23H-RNA	Y57G11C.51	17.9611	14.6272	0	0.827412	5.28398	1.69009	3.12645	0.00176933	0.0148169
MIMAT0020350	miRNA	miR-791-5p	425.935	580.911	10.6918	15.3071	5.2756	0.360865	14.6193	2.11478e-48	1.92093e-46
MIMAT0000290	miRNA	miR-235-3p	251330	145529	2616.93	7762.36	5.25683	0.811868	6.47498	9.48218e-11	2.19346e-09
TACGTTTACATGGAGGTCCCGCC	23H-RNA	F39E9.29_region, F39E9.7	7.69761	8.35843	0.427673	0	5.24915	2.30571	2.27659	0.0228107	0.12593
TCTACAGAGTCTGGAGAATGT	23H-RNA	C36A4.11, K06B9.6	7.69761	8.35843	0.427673	0	5.24915	2.30571	2.27659	0.0228107	0.12593
AAACAACCCTGAACCAGACGT	23H-RNA	F31C3.11, rrn-2.1, rrn-2.1_element	305.339	317.62	9.83647	6.61929	5.24521	0.406848	12.8923	4.97226e-38	3.4742e-36
WBGene00003328	pre-miRNA	mir-235, T09B4.12	1316.29	583	11.5472	38.8884	5.23406	0.958647	5.45985	4.76542e-08	8.06569e-07
GATGATGGCGTGGAAGAAGTTGA	23H-RNA	Y57G11C.1145_hairpin	243.758	1404.22	12.4025	31.4417	5.23228	1.23747	4.2282	2.3557e-05	0.000282291
TTTAGTGACTCTGGCCGTTCACC	23H-RNA	TTTAGTGACTCTGGCCGTTCACC_repeat	5.13174	10.448	0	0.413706	5.22347	2.34694	2.22565	0.0260375	0.137986
MIMAT0022196	miRNA	miR-5552-3p	10.2635	20.8961	0.427673	0.413706	5.21954	1.64373	3.17543	0.00149615	0.0127228
WBGene00171328	piRNA	21ur-10124, T27E7.63	23.0928	8.35843	0.855345	0	5.20325	1.75995	2.95647	0.00311178	0.0242829
MIMAT0004226	miRNA	miR-791-3p	1318.86	1502.43	44.0503	33.0965	5.19437	0.244695	21.2279	5.27228e-100	1.15863e-97
TCCGATCTGGCAAGTTAAGCAA	23H-RNA	rrn-4_RE	30.7905	91.9427	2.13836	1.24112	5.19418	0.942125	5.51326	3.52255e-08	6.12177e-07
WBGene00045325	pre-miRNA	mir-789.1, Y51H4A.34	125.728	177.617	7.27044	1.24112	5.16362	0.692948	7.45168	9.21606e-14	2.70623e-12
GAAGACATCTCAGAAACATCGGC	23H-RNA	F43E2.6	105.201	102.391	0	5.79188	5.16205	2.19645	2.35018	0.0187644	0.108424
GAGTGGGGACTGTCGCTTCGA	23H-RNA	F31C3.7, F31C3.8, rrn-1.1, rrn-1.2	387.447	562.104	13.2579	13.6523	5.14357	0.360707	14.2597	3.90236e-46	3.24205e-44
WBGene00008724	ALG target 22G	F13A7.1	12.8294	2.08961	0	0.413706	5.13689	2.46955	2.08009	0.0375175	0.181397
WBGene00046179	piRNA	21ur-663, Y73F8A.94	0	29.2545	0.427673	0.413706	5.13446	2.04499	2.51075	0.0120473	0.0757127
ATATAGTGACTCTGGCCGTTCA	23H-RNA	ATATAGTGACTCTGGCCGTTCA_repeat	10.2635	18.8065	0	0.827412	5.12868	1.767	2.90249	0.00370212	0.0280854
WBGene00003305	pre-miRNA	mir-77, T21B4.13	7669.39	9029.19	227.094	250.292	5.12853	0.174114	29.4549	1.08818e-190	7.80339e-188
TTAAACGGTAAGGGCCGGCTG	23H-RNA	mir-5592	456.725	503.595	20.1006	7.44671	5.12733	0.428118	11.9765	4.72105e-33	2.83367e-31
WBGene00045330	pre-miRNA	mir-798, Y64G10A.14	0	14.6272	0.427673	0	5.12651	2.78215	1.84264	0.0653816	0.268806
WBGene00166052	piRNA	21ur-12085, Y57G11C.560	0	14.6272	0.427673	0	5.12651	2.78215	1.84264	0.0653816	0.268806
WBGene00168185	piRNA	21ur-6545, Y105C5A.742	0	14.6272	0.427673	0	5.12651	2.78215	1.84264	0.0653816	0.268806
ATCGGACGAGCTCTTATCCCCT	23H-RNA	T05E12.8	33.3563	98.2115	2.56604	1.24112	5.1229	0.91611	5.59202	2.24449e-08	4.04513e-07
TGGAGTGGATGACGACGACGAT	23H-RNA	Y57G11C.1145_hairpin	390.012	833.753	15.3962	19.8579	5.11938	0.417007	12.2765	1.21143e-34	7.64152e-33
MIMAT0000051	miRNA	miR-79-3p	21132.5	17853.6	679.144	453.422	5.10538	0.225066	22.6839	6.46263e-114	2.00121e-111
GATAGTCTCAACAGATCGCAGT	23H-RNA	F31C3.10, F31C3.9, rrn-3.1, rrn-3.56	41.0539	45.9713	2.13836	0.413706	5.10114	1.03243	4.94093	7.7752e-07	1.15149e-05
WBGene00168770	piRNA	21ur-11791, Y57G11A.144	10.2635	4.17921	0.427673	0	5.08431	2.40635	2.11288	0.0346112	0.170306
TTTTGCTGATCTCTCTTCTCGG	23H-RNA	ChrIII_hairpin1	74.4103	81.4947	2.56604	2.06853	5.07457	0.734419	6.90964	4.85879e-12	1.23509e-10
WBGene00050446	piRNA	21ur-513, Y73F8A.461	25.6587	16.7169	0.427673	0.827412	5.06782	1.38784	3.65159	0.000260622	0.00263425
WBGene00047486	piRNA	21ur-4802, F55B11.29	7.69761	6.26882	0.427673	0	5.04377	2.39772	2.10357	0.0354161	0.17339
WBGene00165368	piRNA	21ur-6931, T12E12.23	28.2246	0	0.855345	0	5.04057	2.27253	2.21804	0.0265518	0.139679
WBGene00001427	ALG target 22G	fkb-2, Y18D10A.19	5.13174	0	0	0	5.03659	4.49791	1.11976	0.262815	NA
WBGene00001705	WAGO Class 22G	grd-16, Y69A2AL.1	5.13174	0	0	0	5.03659	4.49791	1.11976	0.262815	NA
WBGene00020841	ALG target 22G	T27A3.5	5.13174	0	0	0	5.03659	4.49791	1.11976	0.262815	NA
WBGene00046644	piRNA	21ur-2216, F13G11.17	5.13174	0	0	0	5.03659	4.49791	1.11976	0.262815	NA
WBGene00047122	piRNA	21ur-4144, F26D12.12	5.13174	0	0	0	5.03659	4.49791	1.11976	0.262815	NA
WBGene00048473	piRNA	21ur-261, Y105C5B.353	5.13174	0	0	0	5.03659	4.49791	1.11976	0.262815	NA
WBGene00048547	piRNA	21ur-4198, Y116A8B.18	5.13174	0	0	0	5.03659	4.49791	1.11976	0.262815	NA
WBGene00048597	piRNA	21ur-3722, Y57G11C.300	5.13174	0	0	0	5.03659	4.49791	1.11976	0.262815	NA
WBGene00049310	piRNA	21ur-522, Y105C5A.380	5.13174	0	0	0	5.03659	4.49791	1.11976	0.262815	NA
WBGene00050369	piRNA	21ur-5332, Y105C5B.544	5.13174	0	0	0	5.03659	4.49791	1.11976	0.262815	NA
WBGene00165212	piRNA	21ur-13281, C47A4.76	5.13174	0	0	0	5.03659	4.49791	1.11976	0.262815	NA
WBGene00165977	piRNA	21ur-14240, Y105C5A.576	5.13174	0	0	0	5.03659	4.49791	1.11976	0.262815	NA
WBGene00166246	piRNA	21ur-6513, Y116A8B.43	5.13174	0	0	0	5.03659	4.49791	1.11976	0.262815	NA
WBGene00166673	piRNA	21ur-5650, C46G7.50	5.13174	0	0	0	5.03659	4.49791	1.11976	0.262815	NA
WBGene00166985	piRNA	21ur-6954, Y57G11C.620	5.13174	0	0	0	5.03659	4.49791	1.11976	0.262815	NA
WBGene00167806	piRNA	21ur-8118, Y57G11C.678	5.13174	0	0	0	5.03659	4.49791	1.11976	0.262815	NA
WBGene00168164	piRNA	21ur-6996, VY10G11R.42	5.13174	0	0	0	5.03659	4.49791	1.11976	0.262815	NA
WBGene00168718	piRNA	21ur-6375, B0273.66	5.13174	0	0	0	5.03659	4.49791	1.11976	0.262815	NA
WBGene00169278	piRNA	21ur-9840, T12E12.32	5.13174	0	0	0	5.03659	4.49791	1.11976	0.262815	NA
WBGene00169508	piRNA	21ur-10403, Y105C5A.854	5.13174	0	0	0	5.03659	4.49791	1.11976	0.262815	NA
WBGene00169601	piRNA	21ur-10865, C10G6.33	5.13174	0	0	0	5.03659	4.49791	1.11976	0.262815	NA
WBGene00169621	piRNA	21ur-14973, H08M01.81	5.13174	0	0	0	5.03659	4.49791	1.11976	0.262815	NA
WBGene00169686	piRNA	21ur-11435, C08F11.89	5.13174	0	0	0	5.03659	4.49791	1.11976	0.262815	NA
WBGene00170917	piRNA	21ur-9199, Y116A8C.349	5.13174	0	0	0	5.03659	4.49791	1.11976	0.262815	NA
WBGene00170996	piRNA	21ur-5867, Y7A9D.53	5.13174	0	0	0	5.03659	4.49791	1.11976	0.262815	NA
WBGene00171351	piRNA	21ur-12703, Y105C5B.1114	5.13174	0	0	0	5.03659	4.49791	1.11976	0.262815	NA
WBGene00172800	piRNA	21ur-14145, Y105C5B.1229	5.13174	0	0	0	5.03659	4.49791	1.11976	0.262815	NA
WBGene00172830	piRNA	21ur-10246, H16O14.66	5.13174	0	0	0	5.03659	4.49791	1.11976	0.262815	NA
WBGene00172949	piRNA	21ur-10928, F58F9.20	5.13174	0	0	0	5.03659	4.49791	1.11976	0.262815	NA
WBGene00173188	piRNA	21ur-7501, F13G11.129	5.13174	0	0	0	5.03659	4.49791	1.11976	0.262815	NA
WBGene00173201	piRNA	21ur-13139, Y105C5B.1264	5.13174	0	0	0	5.03659	4.49791	1.11976	0.262815	NA
WBGene00173295	piRNA	21ur-12503, Y51H4A.842	5.13174	0	0	0	5.03659	4.49791	1.11976	0.262815	NA
WBGene00173506	piRNA	21ur-9879, C11D2.87	5.13174	0	0	0	5.03659	4.49791	1.11976	0.262815	NA
WBGene00194808	pre-miRNA	M106.9, mir-2216	5.13174	0	0	0	5.03659	4.49791	1.11976	0.262815	NA
WBGene00194831	pre-miRNA	mir-2220, Y59E1B.4	5.13174	0	0	0	5.03659	4.49791	1.11976	0.262815	NA
WBGene00169395	piRNA	21ur-14998, H25K10.95	5.13174	8.35843	0	0.413706	5.01363	2.43082	2.06253	0.0391575	0.187135
WBGene00170497	piRNA	21ur-12564, Y105C5B.1048	5.13174	8.35843	0	0.413706	5.01363	2.43082	2.06253	0.0391575	0.187135
WBGene00045327	pre-miRNA	M03B6.6, mir-793	153.952	300.903	3.84905	10.3426	5.00237	0.575014	8.69956	3.33163e-18	1.28959e-16
WBGene00255582	pre-miRNA	mir-8201, Y73B6BL.290	2.56587	10.448	0	0.413706	4.97008	2.52121	1.97131	0.048689	0.218507
MIMAT0004227	miRNA	miR-792-3p	64.1468	54.3298	1.71069	2.06853	4.96713	0.826494	6.00988	1.8566e-09	3.80967e-08
TTTTTTCTGTATTCTTATTTTT	23H-RNA	F52G3.8	94.9372	167.169	6.41509	2.06853	4.95817	0.671209	7.38692	1.50268e-13	4.38416e-12
CGGGATGATGGATCGGGATGA	23H-RNA	T05E12.10	94.9372	150.452	3.84905	4.13706	4.94567	0.609794	8.11039	5.04558e-16	1.75821e-14
MIMAT0032822	miRNA	miR-4810b-3p	76.9761	2.08961	2.56604	0	4.94374	1.62749	3.03765	0.00238429	0.0192452
CCTCAATGTGTGCCTGCTTCT	23H-RNA	Y37E11B.2	12.8294	12.5376	0	0.827412	4.92592	1.82018	2.70628	0.00680407	0.0471784
WBGene00166131	piRNA	21ur-8446, H08M01.64	12.8294	12.5376	0	0.827412	4.92592	1.82018	2.70628	0.00680407	0.0471784
MIMAT0014446	miRNA	miR-2953-5p	0	12.5376	0	0.413706	4.91973	2.8918	1.70127	0.0888925	0.328941
MIMAT0032827	miRNA	miR-8205-5p	0	12.5376	0	0.413706	4.91973	2.8918	1.70127	0.0888925	0.328941
MIMAT0032843	miRNA	miR-8211-3p	0	12.5376	0	0.413706	4.91973	2.8918	1.70127	0.0888925	0.328941
WBGene00013657	ALG target 22G	Y105C5B.18	0	12.5376	0	0.413706	4.91973	2.8918	1.70127	0.0888925	0.328941
WBGene00018232	ALG target 22G	F40E3.5	0	12.5376	0	0.413706	4.91973	2.8918	1.70127	0.0888925	0.328941
WBGene00021006	ALG target 22G	dct-9, W03F11.3	0	12.5376	0	0.413706	4.91973	2.8918	1.70127	0.0888925	0.328941
WBGene00047619	piRNA	21ur-357, Y9C9A.29	0	12.5376	0	0.413706	4.91973	2.8918	1.70127	0.0888925	0.328941
WBGene00172339	piRNA	21ur-7943, C49A9.28	0	12.5376	0	0.413706	4.91973	2.8918	1.70127	0.0888925	0.328941
WBGene00045849	piRNA	21ur-5274, Y105C5B.58	12.8294	0	0	0.413706	4.91931	2.90227	1.69499	0.0900779	0.332246
WBGene00167667	piRNA	21ur-11558, Y51H4A.549	12.8294	0	0	0.413706	4.91931	2.90227	1.69499	0.0900779	0.332246
GTGAAGACATCTCAGAAACATCG	23H-RNA	F43E2.6	28.2246	98.2115	2.13836	2.06853	4.91888	0.918333	5.35631	8.49399e-08	1.4011e-06
TTGATCTCTATGCGACCCCACA	23H-RNA	T05E12.10	25.6587	37.6129	0.855345	1.24112	4.91788	1.11825	4.39786	1.09326e-05	0.000137667
GCGCCCCGACATTGAACCAGAG	23H-RNA	F31C3.10, F31C3.9, rrn-3.1, rrn-3.56	41.0539	10.448	1.28302	0.413706	4.91762	1.35586	3.62694	0.000286805	0.00286911
AAAAAAGAACTGAAGAGAGTG	23H-RNA	C05E7.1, C05E7.t3	2.56587	2.08961	0	0	4.90872	3.92358	1.25108	0.210904	NA
AACCCTGAACCAGACGTACCAA	23H-RNA	F31C3.11, rrn-2.1	2.56587	2.08961	0	0	4.90872	3.92358	1.25108	0.210904	NA
CAACCCTGAACCAGACGTACCA	23H-RNA	F31C3.11, rrn-2.1	2.56587	2.08961	0	0	4.90872	3.92358	1.25108	0.210904	NA
CACGGTGCCAGATCCTGAAAACG	23H-RNA	other	2.56587	2.08961	0	0	4.90872	3.92358	1.25108	0.210904	NA
CAGCCGGCCCTTACCGTTTAAT	23H-RNA	mir-5592	2.56587	2.08961	0	0	4.90872	3.92358	1.25108	0.210904	NA
CATGACGGTTTGATCTACAAA	23H-RNA	CELE14B	2.56587	2.08961	0	0	4.90872	3.92358	1.25108	0.210904	NA
TGCGTCTCTCCCCCTCCCACACT	23H-RNA	other	2.56587	2.08961	0	0	4.90872	3.92358	1.25108	0.210904	NA
TTTAAAGTCGTAGAAGTGGGAAA	23H-RNA	NPALTA1	2.56587	2.08961	0	0	4.90872	3.92358	1.25108	0.210904	NA
TTTGGCAGCCCCCGACACTTTCG	23H-RNA	F39D8.3	2.56587	2.08961	0	0	4.90872	3.92358	1.25108	0.210904	NA
TTTGGGGGGCAGAAATCGGAAA	23H-RNA	PAL8C	2.56587	2.08961	0	0	4.90872	3.92358	1.25108	0.210904	NA
TTTTGCCTTTTCCCCGTGAGT	23H-RNA	PALTA3	2.56587	2.08961	0	0	4.90872	3.92358	1.25108	0.210904	NA
WBGene00004960	ALG target 22G	spe-6, Y66D12A.20	0	12.5376	0.427673	0	4.90429	2.89168	1.696	0.0898859	0.331886
MIMAT0011447	miRNA	miR-2216-5p	12.8294	0	0.427673	0	4.90384	2.90213	1.68974	0.0910783	0.334035
WBGene00170263	piRNA	21ur-11497, Y41E3.353	12.8294	0	0.427673	0	4.90384	2.90213	1.68974	0.0910783	0.334035
WBGene00171478	piRNA	21ur-7969, E03H12.22	12.8294	0	0.427673	0	4.90384	2.90213	1.68974	0.0910783	0.334035
WBGene00171713	piRNA	21ur-7631, C47A4.117	12.8294	0	0.427673	0	4.90384	2.90213	1.68974	0.0910783	0.334035
WBGene00171866	piRNA	21ur-10907, Y105C5A.1033	12.8294	0	0.427673	0	4.90384	2.90213	1.68974	0.0910783	0.334035
WBGene00173314	piRNA	21ur-11968, Y105C5A.1148	12.8294	0	0.427673	0	4.90384	2.90213	1.68974	0.0910783	0.334035
TTTTCCCATCCAACTGACTGA	23H-RNA	W04B5.8	7.69761	29.2545	0	1.24112	4.89615	1.64989	2.96756	0.00300179	0.0236549
MIMAT0049030	miRNA	miR-58c	89.8055	123.287	5.55974	1.65482	4.89253	0.697561	7.01377	2.31987e-12	6.07851e-11
GTATTAAACGGTAAGGGCCGGC	23H-RNA	mir-5592	2404.22	3335.01	97.5094	97.2209	4.88216	0.226185	21.5848	2.49323e-103	5.95968e-101
CAAGTGCGACATAAAGGGAACA	23H-RNA	T05E12.10	28.2246	8.35843	0.855345	0.413706	4.84093	1.51043	3.205	0.00135062	0.0116249
CCTTCTACTTGGACGGAACAGCC	23H-RNA	Y17D7C.3	69.2785	50.1506	2.13836	2.06853	4.82357	0.814862	5.91949	3.22935e-09	6.46107e-08
MIMAT0004225	miRNA	miR-790-5p	10561.1	12084.2	423.824	381.437	4.81387	0.165398	29.1048	3.1221e-186	2.12693e-183
TTTTCGGGGTACGGTATCTAATA	23H-RNA	ChrIII_hairpin2	15.3952	8.35843	0.427673	0.413706	4.81144	1.75587	2.7402	0.00614019	0.043766
WBGene00049376	piRNA	21ur-3643, Y105C5B.440	23.0928	12.5376	0.855345	0.413706	4.80803	1.46607	3.27955	0.00103974	0.00914164
ATCCCCCCTCCTGTGGAAGTAGA	23H-RNA	C36A4.14	79.542	246.574	6.84276	4.96447	4.7948	0.656285	7.30598	2.7526e-13	7.78094e-12
WBGene00171474	piRNA	21ur-7070, F52B11.76	0	22.9857	0.427673	0.413706	4.78829	2.13956	2.23798	0.0252222	0.135563
MIMAT0006772	miRNA	miR-1830-5p	105.201	68.957	2.99371	3.30965	4.78287	0.690656	6.92511	4.35625e-12	1.11358e-10
WBGene00077708	pre-miRNA	mir-1817, Y37F4.9	25.6587	20.8961	1.28302	0.413706	4.78171	1.28922	3.70899	0.000208091	0.00214142
CTGAGGATTTTGAGTGAGGCTGA	23H-RNA	M4.2, puf-4	0	4.17921	0	0	4.77006	4.85411	0.982686	0.325762	NA
MIMAT0011428	miRNA	miR-2208a-3p	0	4.17921	0	0	4.77006	4.85411	0.982686	0.325762	NA
MIMAT0020338	miRNA	miR-249-5p	0	4.17921	0	0	4.77006	4.85411	0.982686	0.325762	NA
MIMAT0020357	miRNA	miR-1022-3p	0	4.17921	0	0	4.77006	4.85411	0.982686	0.325762	NA
MIMAT0032844	miRNA	miR-8212-5p	0	4.17921	0	0	4.77006	4.85411	0.982686	0.325762	NA
WBGene00003424	ALG target 22G	F26G1.7, msp-3	0	4.17921	0	0	4.77006	4.85411	0.982686	0.325762	NA
WBGene00006720	ALG target 22G	F25H2.8, ubc-25	0	4.17921	0	0	4.77006	4.85411	0.982686	0.325762	NA
WBGene00010990	ALG target 22G	R03D7.4, tceb-3	0	4.17921	0	0	4.77006	4.85411	0.982686	0.325762	NA
WBGene00013696	ALG target 22G	Y106G6A.4	0	4.17921	0	0	4.77006	4.85411	0.982686	0.325762	NA
WBGene00013723	ALG target 22G	Y106G6H.13	0	4.17921	0	0	4.77006	4.85411	0.982686	0.325762	NA
WBGene00015627	ALG Class 26G	C09B9.2	0	4.17921	0	0	4.77006	4.85411	0.982686	0.325762	NA
WBGene00015917	ALG target 22G	C17G10.3	0	4.17921	0	0	4.77006	4.85411	0.982686	0.325762	NA
WBGene00019081	ALG target 22G	F59A3.8	0	4.17921	0	0	4.77006	4.85411	0.982686	0.325762	NA
WBGene00019879	ALG target 22G	R05D3.5	0	4.17921	0	0	4.77006	4.85411	0.982686	0.325762	NA
WBGene00022108	ALG target 22G	Y71F9AL.2	0	4.17921	0	0	4.77006	4.85411	0.982686	0.325762	NA
WBGene00022578	ALG target 22G	ZC262.1	0	4.17921	0	0	4.77006	4.85411	0.982686	0.325762	NA
WBGene00022849	ALG Class 26G	acs-6, ZK1127.2	0	4.17921	0	0	4.77006	4.85411	0.982686	0.325762	NA
WBGene00046198	piRNA	21ur-1812, C52D10.20	0	4.17921	0	0	4.77006	4.85411	0.982686	0.325762	NA
WBGene00046807	piRNA	21ur-369, T11F8.6	0	4.17921	0	0	4.77006	4.85411	0.982686	0.325762	NA
WBGene00047139	piRNA	21ur-647, Y45F10D.29	0	4.17921	0	0	4.77006	4.85411	0.982686	0.325762	NA
WBGene00047295	piRNA	21ur-4073, Y57G11C.192	0	4.17921	0	0	4.77006	4.85411	0.982686	0.325762	NA
WBGene00047745	piRNA	21ur-2280, Y105C5B.261	0	4.17921	0	0	4.77006	4.85411	0.982686	0.325762	NA
WBGene00048148	piRNA	21ur-935, M199.33	0	4.17921	0	0	4.77006	4.85411	0.982686	0.325762	NA
WBGene00048311	piRNA	21ur-2776, Y57G11C.272	0	4.17921	0	0	4.77006	4.85411	0.982686	0.325762	NA
WBGene00048766	piRNA	21ur-2431, Y105C5A.331	0	4.17921	0	0	4.77006	4.85411	0.982686	0.325762	NA
WBGene00165809	piRNA	21ur-6122, Y4C6B.36	0	4.17921	0	0	4.77006	4.85411	0.982686	0.325762	NA
WBGene00165975	piRNA	21ur-15117, VY10G11R.35	0	4.17921	0	0	4.77006	4.85411	0.982686	0.325762	NA
WBGene00166118	piRNA	21ur-10244, Y105C5A.591	0	4.17921	0	0	4.77006	4.85411	0.982686	0.325762	NA
WBGene00166892	piRNA	21ur-7719, C47A4.87	0	4.17921	0	0	4.77006	4.85411	0.982686	0.325762	NA
WBGene00167340	piRNA	21ur-12558, T23G4.73	0	4.17921	0	0	4.77006	4.85411	0.982686	0.325762	NA
WBGene00167767	piRNA	21ur-12484, Y43D4A.98	0	4.17921	0	0	4.77006	4.85411	0.982686	0.325762	NA
WBGene00168093	piRNA	21ur-14777, D2024.12	0	4.17921	0	0	4.77006	4.85411	0.982686	0.325762	NA
WBGene00168393	piRNA	21ur-11888, Y105C5B.874	0	4.17921	0	0	4.77006	4.85411	0.982686	0.325762	NA
WBGene00168581	piRNA	21ur-8927, Y105C5A.769	0	4.17921	0	0	4.77006	4.85411	0.982686	0.325762	NA
WBGene00168657	piRNA	21ur-13637, Y116A8C.296	0	4.17921	0	0	4.77006	4.85411	0.982686	0.325762	NA
WBGene00169262	piRNA	21ur-8200, F26D12.57	0	4.17921	0	0	4.77006	4.85411	0.982686	0.325762	NA
WBGene00169396	piRNA	21ur-13480, H16O14.40	0	4.17921	0	0	4.77006	4.85411	0.982686	0.325762	NA
WBGene00169840	piRNA	21ur-15214, H08M01.82	0	4.17921	0	0	4.77006	4.85411	0.982686	0.325762	NA
WBGene00170683	piRNA	21ur-8599, Y105C5A.951	0	4.17921	0	0	4.77006	4.85411	0.982686	0.325762	NA
WBGene00171049	piRNA	21ur-8197, Y51H4A.709	0	4.17921	0	0	4.77006	4.85411	0.982686	0.325762	NA
WBGene00171813	piRNA	21ur-10216, Y57G11C.930	0	4.17921	0	0	4.77006	4.85411	0.982686	0.325762	NA
WBGene00173799	piRNA	21ur-10966, Y105C5A.1182	0	4.17921	0	0	4.77006	4.85411	0.982686	0.325762	NA
WBGene00174127	piRNA	21ur-13259, Y73F8A.1098	0	4.17921	0	0	4.77006	4.85411	0.982686	0.325762	NA
WBGene00174890	piRNA	21ur-11834, Y105C5B.1403	0	4.17921	0	0	4.77006	4.85411	0.982686	0.325762	NA
WBGene00255563	pre-miRNA	C16H3.8, mir-2217.2	0	4.17921	0	0	4.77006	4.85411	0.982686	0.325762	NA
WBGene00255566	pre-miRNA	C50H11.19, mir-8200	0	4.17921	0	0	4.77006	4.85411	0.982686	0.325762	NA
WBGene00255580	pre-miRNA	mir-8211, Y56A3A.40	0	4.17921	0	0	4.77006	4.85411	0.982686	0.325762	NA
WBGene00174287	piRNA	21ur-7033, Y41E3.450	5.13174	6.26882	0	0.413706	4.76766	2.54318	1.87469	0.0608358	0.255532
AAGACCCTGTTGAGCTTGACTC	23H-RNA	F31C3.9, rrn-3.1	166.782	165.079	8.12578	4.13706	4.76147	0.524747	9.07383	1.14903e-19	4.6733e-18
WBGene00168387	piRNA	21ur-14491, Y57G11A.137	5.13174	6.26882	0.427673	0	4.75519	2.54283	1.87004	0.061478	0.257735
CCCCATTGCCGAATGTTTGAATC	23H-RNA	Y37E3.30	35.9222	64.7778	0.855345	2.89594	4.74663	0.945416	5.02067	5.14905e-07	7.81245e-06
TTGCTTTTTGATCCTTCGATGT	23H-RNA	F31C3.10, F31C3.9, rrn-3.1, rrn-3.56	30.7905	14.6272	1.28302	0.413706	4.73995	1.33055	3.5624	0.000367473	0.00359686
TGATTACGTCCCTGCCCTTTGT	23H-RNA	F31C3.7, F31C3.8, rrn-1.1, rrn-1.2	100.069	66.8674	1.71069	4.55077	4.72817	0.74088	6.38183	1.74986e-10	3.96704e-09
WBGene00235084	pre-miRNA	K12D12.10, mir-5594	23.0928	64.7778	1.28302	2.06853	4.71951	1.00832	4.68056	2.86091e-06	3.93737e-05
WBGene00173885	piRNA	21ur-5718, H25K10.131	2.56587	8.35843	0	0.413706	4.71666	2.62929	1.79389	0.0728303	0.288547
TTCGTTCTTGGTGAAAAAAGTG	23H-RNA	E01G4.7	35.9222	60.5986	2.13836	1.65482	4.67675	0.900517	5.19341	2.06479e-07	3.26745e-06
GAATCAGAACACGGGGGCGACA	23H-RNA	hmg-1.1, Y48B6A.14	15.3952	6.26882	0.855345	0	4.66402	1.9518	2.3896	0.0168665	0.0993974
WBGene00010366	ALG Class 26G	H05L14.1	0	10.448	0	0.413706	4.65779	3.03511	1.53463	0.124874	0.404999
GCAAGTGATTTAGCGCCCCGAC	23H-RNA	F31C3.10, F31C3.9, rrn-3.1, rrn-3.56	61.5809	127.466	1.71069	5.79188	4.65603	0.766263	6.07628	1.23001e-09	2.56251e-08
WBGene00003314	pre-miRNA	mir-86, Y56A3A.34	325.866	436.728	19.2453	11.1701	4.65217	0.393388	11.8259	2.86839e-32	1.64902e-30
WBGene00045957	piRNA	21ur-938, H25K10.11	0	10.448	0.427673	0	4.64142	3.03487	1.52936	0.126174	0.406893
WBGene00046298	piRNA	21ur-2468, Y57G11C.108	0	10.448	0.427673	0	4.64142	3.03487	1.52936	0.126174	0.406893
WBGene00050776	piRNA	21ur-334, Y57G11C.490	0	10.448	0.427673	0	4.64142	3.03487	1.52936	0.126174	0.406893
WBGene00171371	piRNA	21ur-14567, Y37A1B.273	0	10.448	0.427673	0	4.64142	3.03487	1.52936	0.126174	0.406893
TACGGTTTGATCTACAAAAAATGC	23H-RNA	CELE14B	12.8294	8.35843	0.855345	0	4.6366	1.93527	2.39584	0.0165825	0.0980487
MIMAT0022184	miRNA	miR-5546-3p	23.0928	18.8065	1.28302	0.413706	4.6294	1.32994	3.4809	0.000499735	0.00473497
CATGGCCGTTCTTAGTTGGTGGA	23H-RNA	F31C3.7, F31C3.8, rrn-1.1, rrn-1.2	43.6198	29.2545	1.71069	1.24112	4.62262	1.00985	4.57754	4.70466e-06	6.30295e-05
AAAATTCAAATTTAACTCCGTG	23H-RNA	Y69A2AR.16_hairpin	5.13174	25.0753	0	1.24112	4.60787	1.78205	2.58571	0.0097179	0.0635348
WBGene00012741	ALG target 22G	Y40H4A.2	10.2635	0	0	0.413706	4.59643	3.07692	1.49384	0.135216	0.422454
WBGene00047165	piRNA	21ur-1085, H12I19.23	10.2635	0	0	0.413706	4.59643	3.07692	1.49384	0.135216	0.422454
WBGene00047673	piRNA	21ur-4949, Y73F8A.218	10.2635	0	0	0.413706	4.59643	3.07692	1.49384	0.135216	0.422454
WBGene00050586	piRNA	21ur-3407, Y57G11C.473	10.2635	0	0	0.413706	4.59643	3.07692	1.49384	0.135216	0.422454
WBGene00165191	piRNA	21ur-14892, C11D2.43	10.2635	0	0	0.413706	4.59643	3.07692	1.49384	0.135216	0.422454
WBGene00169724	piRNA	21ur-8751, H25K10.99	10.2635	0	0	0.413706	4.59643	3.07692	1.49384	0.135216	0.422454
WBGene00171612	piRNA	21ur-14545, Y105C5B.1139	10.2635	0	0	0.413706	4.59643	3.07692	1.49384	0.135216	0.422454
WBGene00049866	piRNA	21ur-1250, Y43D4A.59	20.527	0	0.427673	0.413706	4.59152	2.21822	2.06991	0.038461	0.185039
MIMAT0000292	miRNA	miR-237-5p	111528	136470	5464.8	4854.84	4.58689	0.171351	26.769	7.41399e-158	3.6077e-155
MIMAT0000288	miRNA	miR-233-3p	5778.34	5301.33	282.692	180.376	4.5808	0.23641	19.3765	1.21938e-83	2.24514e-81
WBGene00168680	piRNA	21ur-11335, Y116A8C.297	10.2635	0	0.427673	0	4.57985	3.07663	1.48859	0.136595	0.425362
WBGene00303114	pre-miRNA	Y73B6A.17	20.527	0	0.855345	0	4.57849	2.44231	1.87466	0.0608402	0.255532
WBGene00003347	pre-miRNA	F44E7.11, mir-253	23.0928	27.1649	1.28302	0.827412	4.57833	1.18679	3.85775	0.000114434	0.00123449
AGTTGGTTGATGCTTGTCCGG	23H-RNA	F31C3.9, rrn-3.1	10.2635	29.2545	0	1.65482	4.57738	1.56113	2.93209	0.0033669	0.0259469
GCCCTTACCGTTTAATACATG	23H-RNA	mir-5592	110.332	71.0466	4.27673	3.30965	4.57596	0.667429	6.8561	7.07657e-12	1.77894e-10
CCCTTTGTACACACCGCCCGTCG	23H-RNA	F31C3.7, F31C3.8, rrn-1.1, rrn-1.2	20.527	18.8065	0.855345	0.827412	4.54586	1.32076	3.44186	0.000577738	0.00542489
MIMAT0011432	miRNA	miR-2209a-3p	271.982	156.721	3.42138	14.8934	4.54316	0.633189	7.17505	7.22832e-13	1.96187e-11
MIMAT0000058	miRNA	miR-85-3p	20480.8	58929	1906.14	1502.58	4.54203	0.71843	6.32216	2.57933e-10	5.72367e-09
MIMAT0015113	miRNA	miR-230-5p	785.157	1303.91	37.6352	52.5407	4.53503	0.323528	14.0174	1.21938e-44	9.88928e-43
WBGene00172076	piRNA	21ur-12932, H16O14.55	7.69761	2.08961	0	0.413706	4.53079	2.72409	1.66323	0.0962661	0.346877
MIMAT0005031	miRNA	miR-1018	69.2785	71.0466	1.71069	4.55077	4.48198	0.761426	5.8863	3.94939e-09	7.78732e-08
MIMAT0020001	miRNA	miR-4813-3p	708.18	779.423	41.9119	24.8224	4.48045	0.311559	14.3807	6.83572e-47	5.85765e-45
MIMAT0006586	miRNA	miR-1819-3p	669.692	1140.93	40.6289	40.9569	4.47419	0.318767	14.0359	9.3954e-45	7.66541e-43
WBGene00174231	piRNA	21ur-10524, F26D12.88	10.2635	8.35843	0.855345	0	4.45222	2.00982	2.21524	0.0267439	0.140418
ATGTATGGAGGACGAACACAACC	23H-RNA	C36A4.14	56.4492	162.989	4.27673	5.79188	4.45201	0.70605	6.30551	2.87248e-10	6.3227e-09
WBGene00174918	piRNA	21ur-8712, Y105C5B.1405	5.13174	31.3441	1.28302	0.413706	4.4449	1.53248	2.90047	0.00372602	0.028222
GTGCCTAACTTCTCGCTCATGA	23H-RNA	F31C3.9, rrn-3.1	12.8294	14.6272	0.855345	0.413706	4.44101	1.55961	2.84751	0.00440634	0.0327352
MIMAT0015101	miRNA	miR-59-5p	12.8294	14.6272	1.28302	0	4.43047	1.71625	2.58148	0.00983774	0.0642355
WBGene00171447	piRNA	21ur-5671, Y57G11C.909	17.9611	0	0	0.827412	4.41857	2.5226	1.75159	0.0798436	0.307394
WBGene00173119	piRNA	21ur-8158, B0513.79	2.56587	6.26882	0	0.413706	4.4085	2.77882	1.58646	0.112634	0.382609
WBGene00077726	pre-miRNA	C46A5.10, mir-1820	69.2785	108.66	4.27673	4.13706	4.40761	0.657675	6.70181	2.05853e-11	4.99067e-10
WBGene00167471	piRNA	21ur-5777, Y57G11C.656	15.3952	29.2545	1.71069	0.413706	4.40662	1.30488	3.37702	0.000732752	0.00667809
GATGATGGCGTGGAAGAAGTTG	23H-RNA	Y57G11C.1145_hairpin	148.821	361.502	5.55974	18.6168	4.4007	0.621229	7.08386	1.40191e-12	3.71614e-11
WBGene00169826	piRNA	21ur-15519, Y57G11C.801	17.9611	0	0.427673	0.413706	4.39779	2.28087	1.92812	0.0538404	0.234612
MIMAT0032832	miRNA	miR-8207-3p	2.56587	6.26882	0.427673	0	4.39418	2.7783	1.58161	0.11374	0.384797
WBGene00050116	piRNA	21ur-674, Y116A8C.168	7.69761	18.8065	1.28302	0	4.38599	1.77956	2.46464	0.0137149	0.0840225
GAAAGACTAATCGAACCATCTA	23H-RNA	F31C3.9, rrn-3.1	66.7127	56.4194	2.56604	3.30965	4.38589	0.757419	5.79057	7.0149e-09	1.33489e-07
WBGene00006409	ALG target 22G	C09G9.4, hdl-2	17.9611	0	0.855345	0	4.38472	2.52346	1.73758	0.082285	0.313715
TCAATGACGGAGTCGAGATCGAC	23H-RNA	Y37E11B.2	153.952	165.079	9.4088	6.20559	4.35544	0.495257	8.79431	1.43927e-18	5.65129e-17
GAAGAGCCGACATCGAAGGATCA	23H-RNA	F31C3.10, F31C3.9, rrn-3.1, rrn-3.56	15.3952	10.448	1.28302	0	4.33724	1.75879	2.46604	0.0136616	0.083814
WBGene00049891	piRNA	21ur-4194, C24D10.19	0	8.35843	0	0.413706	4.33717	3.23215	1.34188	0.179634	0.495167
WBGene00166169	piRNA	21ur-14344, Y73F8A.580	0	8.35843	0	0.413706	4.33717	3.23215	1.34188	0.179634	0.495167
WBGene00171957	piRNA	21ur-7747, R05A10.98	0	8.35843	0	0.413706	4.33717	3.23215	1.34188	0.179634	0.495167
WBGene00189970	pre-miRNA	F46F2.8, mir-4812	0	8.35843	0	0.413706	4.33717	3.23215	1.34188	0.179634	0.495167
WBGene00219224	pre-miRNA	mir-4924, T11G6.10	0	8.35843	0	0.413706	4.33717	3.23215	1.34188	0.179634	0.495167
GCTACACCTCTCATGACTCTT	23H-RNA	F31C3.9, rrn-3.1	71.8444	31.3441	5.13207	0	4.33069	1.20459	3.59515	0.000324202	0.00320091
WBGene00016541	ALG target 22G	C39H7.1	0	8.35843	0.427673	0	4.31963	3.23175	1.33662	0.181347	0.497252
WBGene00021968	ALG target 22G	Y57G7A.5	0	8.35843	0.427673	0	4.31963	3.23175	1.33662	0.181347	0.497252
WBGene00164999	piRNA	21ur-8062, Y67A10A.146	0	8.35843	0.427673	0	4.31963	3.23175	1.33662	0.181347	0.497252
WBGene00165457	piRNA	21ur-13793, Y57G11A.90	0	8.35843	0.427673	0	4.31963	3.23175	1.33662	0.181347	0.497252
WBGene00165821	piRNA	21ur-9537, Y41E3.242	0	8.35843	0.427673	0	4.31963	3.23175	1.33662	0.181347	0.497252
WBGene00167744	piRNA	21ur-6759, Y57G11C.673	0	8.35843	0.427673	0	4.31963	3.23175	1.33662	0.181347	0.497252
WBGene00168470	piRNA	21ur-12972, LLC1.61	0	8.35843	0.427673	0	4.31963	3.23175	1.33662	0.181347	0.497252
WBGene00170733	piRNA	21ur-12899, Y73F8A.861	0	8.35843	0.427673	0	4.31963	3.23175	1.33662	0.181347	0.497252
WBGene00199918	pre-miRNA	F22D3.9, mir-8192	0	8.35843	0.427673	0	4.31963	3.23175	1.33662	0.181347	0.497252
MIMAT0000307	miRNA	miR-251	87.2396	171.348	5.98742	7.033	4.31709	0.591077	7.30377	2.79807e-13	7.89309e-12
WBGene00077727	pre-miRNA	F59D6.9, mir-1821	10.2635	14.6272	0.855345	0.413706	4.30227	1.61173	2.66935	0.00759974	0.051903
MIMAT0000043	miRNA	miR-71-5p	2.13564e+06	2.89978e+06	132046	123600	4.29989	0.19039	22.5847	6.1305e-113	1.77719e-110
CCGATGTTTCTGAGATGTCTT	23H-RNA	F43E2.6	5.13174	27.1649	0	1.65482	4.29051	1.73763	2.46918	0.0135422	0.0833392
CACTAATAGGGAACGTGAGCT	23H-RNA	F31C3.10, F31C3.9, rrn-3.1, rrn-3.56	192.44	169.258	8.55345	9.92894	4.28839	0.454651	9.43227	4.013e-21	1.70866e-19
MIMAT0000297	miRNA	miR-241-5p	67426	43618.5	2597.68	3110.24	4.28196	0.232443	18.4215	8.82695e-76	1.38238e-73
MIMAT0006590	miRNA	miR-1823-3p	30.7905	18.8065	2.13836	0.413706	4.28135	1.24374	3.44231	0.000576767	0.00541962
WBGene00019642	ALG Class 26G	K11C4.1	15.3952	16.7169	0.427673	1.24112	4.26232	1.43816	2.96372	0.00303941	0.0239237
WBGene00166667	piRNA	21ur-11035, T06A10.52	5.13174	18.8065	1.28302	0	4.24096	1.87946	2.25648	0.0240409	0.130553
CATTTTTGGTAAGCAGAACTGGC	23H-RNA	F31C3.9, rrn-3.1	585.019	555.835	30.7924	29.7868	4.2348	0.276822	15.2979	7.89305e-53	8.20938e-51
MIMAT0011429	miRNA	miR-2208b-5p	71.8444	94.0323	5.55974	3.30965	4.23051	0.668042	6.3327	2.40904e-10	5.36327e-09
GACGTACCAACTGGAGGCCCA	23H-RNA	F31C3.11, rrn-2.1	38.4881	16.7169	1.71069	1.24112	4.21707	1.13455	3.71695	0.000201644	0.00208611
WBGene00045960	piRNA	21ur-4804, AC7.6	15.3952	0	0	0.827412	4.19575	2.62423	1.59885	0.109855	0.37651
WBGene00167199	piRNA	21ur-7286, F44E8.23	15.3952	0	0	0.827412	4.19575	2.62423	1.59885	0.109855	0.37651
WBGene00049283	piRNA	21ur-650, H25K10.44	2.56587	12.5376	0	0.827412	4.19563	2.25481	1.86075	0.0627795	0.261261
WBGene00077717	pre-miRNA	mir-1823, T07D10.9	48.7516	43.8817	2.99371	2.06853	4.19413	0.850041	4.93403	8.05516e-07	1.18907e-05
WBGene00048308	piRNA	21ur-3988, R05A10.37	12.8294	10.448	1.28302	0	4.1878	1.81537	2.30686	0.0210627	0.11825
MIMAT0006587	miRNA	miR-1820-5p	1026.35	10328.9	406.289	219.678	4.18118	1.39461	2.99811	0.00271663	0.021633
WBGene00167540	piRNA	21ur-11907, Y40H7A.195	7.69761	0	0	0.413706	4.18019	3.3375	1.25249	0.210391	0.540048
WBGene00169915	piRNA	21ur-14523, Y64G10A.252	7.69761	0	0	0.413706	4.18019	3.3375	1.25249	0.210391	0.540048
WBGene00170593	piRNA	21ur-11598, Y73F8A.852	7.69761	0	0	0.413706	4.18019	3.3375	1.25249	0.210391	0.540048
WBGene00172104	piRNA	21ur-11761, Y7A9B.8	7.69761	0	0	0.413706	4.18019	3.3375	1.25249	0.210391	0.540048
WBGene00172693	piRNA	21ur-15635, Y105C5A.1103	7.69761	0	0	0.413706	4.18019	3.3375	1.25249	0.210391	0.540048
MIMAT0011430	miRNA	miR-2208b-3p	238.626	117.018	5.98742	13.6523	4.17192	0.584875	7.13301	9.81975e-13	2.64415e-11
WBGene00003299	pre-miRNA	F16A11.4, mir-71	5650.05	7618.71	377.207	359.924	4.17041	0.200031	20.8488	1.56131e-96	3.17505e-94
WBGene00046934	piRNA	21ur-5178, Y105C5B.170	7.69761	0	0.427673	0	4.16211	3.33695	1.24728	0.212295	0.541835
WBGene00166662	piRNA	21ur-7242, Y4C6A.26	7.69761	0	0.427673	0	4.16211	3.33695	1.24728	0.212295	0.541835
WBGene00167786	piRNA	21ur-9657, Y41E3.295	7.69761	0	0.427673	0	4.16211	3.33695	1.24728	0.212295	0.541835
WBGene00167799	piRNA	21ur-6174, Y73F8A.681	7.69761	0	0.427673	0	4.16211	3.33695	1.24728	0.212295	0.541835
WBGene00168116	piRNA	21ur-9868, F55B11.82	7.69761	0	0.427673	0	4.16211	3.33695	1.24728	0.212295	0.541835
WBGene00173487	piRNA	21ur-7710, Y116A8B.86	7.69761	0	0.427673	0	4.16211	3.33695	1.24728	0.212295	0.541835
WBGene00174751	piRNA	21ur-12628, C30H6.18	7.69761	0	0.427673	0	4.16211	3.33695	1.24728	0.212295	0.541835
WBGene00166748	piRNA	21ur-5579, Y57G11C.606	15.3952	0	0.855345	0	4.16102	2.62509	1.5851	0.112945	0.382994
WBGene00048929	piRNA	21ur-5328, Y37A1B.112	5.13174	25.0753	1.71069	0	4.16049	1.76668	2.35498	0.0185239	0.107216
MIMAT0015098	miRNA	miR-48-3p	585.019	284.187	16.2516	32.2691	4.15897	0.464576	8.95218	3.48526e-19	1.39257e-17
GTATTAAACGGTAAGGGCCGGCT	23H-RNA	mir-5592	66.7127	54.3298	5.55974	1.24112	4.15655	0.856787	4.85132	1.22643e-06	1.77389e-05
MIMAT0032838	miRNA	miR-8210-3p	7.69761	14.6272	0.855345	0.413706	4.14872	1.67933	2.47046	0.013494	0.0831177
GATTACGTCCCTGCCCTTTGT	23H-RNA	F31C3.7, F31C3.8, rrn-1.1, rrn-1.2	166.782	144.183	3.84905	14.066	4.11334	0.617957	6.65634	2.80722e-11	6.76962e-10
MIMAT0000047	miRNA	miR-75-3p	615.809	325.979	36.3522	18.2031	4.10832	0.443117	9.27141	1.83706e-20	7.58481e-19
WBGene00003261	pre-miRNA	M04C9.7, mir-2	20.527	73.1362	2.99371	2.48224	4.10752	0.956347	4.29501	1.74685e-05	0.000213652
WBGene00003337	pre-miRNA	mir-243, R08C7.14	551.662	936.144	44.9056	41.7843	4.10383	0.325867	12.5935	2.29139e-36	1.50822e-34
WBGene00219270	pre-miRNA	mir-5550, T07A9.17	30.7905	33.4337	0	3.72335	4.10294	1.29591	3.16607	0.00154514	0.0130599
WBGene00003311	pre-miRNA	C06A6.6, mir-83	92.3714	96.1219	7.27044	3.72335	4.10293	0.629601	6.51672	7.18618e-11	1.68813e-09
WBGene00003310	pre-miRNA	mir-82, T07D1.7	402.842	420.011	24.3773	23.9949	4.08888	0.309939	13.1925	9.68745e-40	7.02082e-38
WBGene00003295	pre-miRNA	EGAP1.2, mir-67	33.3563	52.2402	3.42138	1.65482	4.08394	0.909273	4.49144	7.07443e-06	9.20621e-05
WBGene00013279	ALG target 22G	Y57A10B.7	5.13174	2.08961	0.427673	0	4.08006	2.95625	1.38015	0.167541	0.475255
WBGene00171135	piRNA	21ur-9493, LLC1.86	5.13174	2.08961	0.427673	0	4.08006	2.95625	1.38015	0.167541	0.475255
WBGene00171782	piRNA	21ur-7322, T23G4.97	5.13174	2.08961	0.427673	0	4.08006	2.95625	1.38015	0.167541	0.475255
TGTAACAACTCACCTGCCGAAT	23H-RNA	F31C3.9, rrn-3.1	156.518	37.6129	9.4088	2.06853	4.07684	0.892923	4.56572	4.97776e-06	6.60389e-05
MIMAT0020335	miRNA	miR-241-3p	2537.65	2077.07	84.2515	190.305	4.07031	0.342578	11.8814	1.47896e-32	8.64841e-31
MIMAT0020352	miRNA	miR-794-3p	169.347	190.154	9.4088	11.9975	4.07018	0.449871	9.04743	1.46375e-19	5.91799e-18
MIMAT0000291	miRNA	miR-236-3p	22967.1	13586.6	1273.61	919.668	4.05876	0.272055	14.9189	2.48334e-50	2.45185e-48
WBGene00166798	piRNA	21ur-6831, Y105C5A.640	28.2246	0	0.855345	0.827412	4.05268	1.91781	2.11318	0.0345855	0.170241
WBGene00045351	pre-miRNA	mir-790, T12E12.8	110.332	119.108	7.69811	6.20559	4.04646	0.545003	7.42466	1.13071e-13	3.3131e-12
WBGene00174605	piRNA	21ur-14613, Y51H4A.912	28.2246	0	1.28302	0.413706	4.04443	1.95984	2.06366	0.0390502	0.186884
WBGene00303115	pre-miRNA	B0462.6	0	20.8961	1.28302	0	4.04419	2.36297	1.71149	0.0869914	0.324728
CTTCATCTAAGGCTAAATATCGA	23H-RNA	F31C3.9, rrn-3.1	20.527	20.8961	0.855345	1.65482	4.04177	1.23199	3.28068	0.00103559	0.00912082
WBGene00003323	pre-miRNA	F46G11.5, mir-230	246.324	202.692	12.8302	14.4797	4.03664	0.407904	9.89605	4.33055e-23	1.97999e-21
WBGene00173373	piRNA	21ur-10176, Y51H4A.844	7.69761	6.26882	0.855345	0	4.03568	2.20997	1.82612	0.0678317	0.275272
MIMAT0000296	miRNA	miR-240-3p	5752.68	3190.83	291.673	253.602	4.03526	0.28005	14.4091	4.53878e-47	3.96416e-45
MIMAT0000282	miRNA	miR-124-3p	438.764	277.918	28.2264	15.7208	4.02618	0.420775	9.56848	1.08492e-21	4.70767e-20
MIMAT0000006	miRNA	miR-35-3p	2.57118e+06	1.97729e+06	139922	139478	4.02498	0.177674	22.6537	1.28347e-113	3.88607e-111
WBGene00050076	piRNA	21ur-756, T08B6.21	7.69761	12.5376	0.427673	0.827412	4.0146	1.72072	2.3331	0.0196431	0.112547
AATACCTAACGAGACCCAACTTT	23H-RNA	PALTA3	2.56587	0	0	0	4.01118	4.9803	0.80541	0.420583	NA
MIMAT0006768	miRNA	miR-1828	2.56587	0	0	0	4.01118	4.9803	0.80541	0.420583	NA
MIMAT0011457	miRNA	miR-2218b-5p	2.56587	0	0	0	4.01118	4.9803	0.80541	0.420583	NA
MIMAT0032791	miRNA	miR-8189-5p	2.56587	0	0	0	4.01118	4.9803	0.80541	0.420583	NA
WBGene00001245	ALG target 22G	elo-7, F56H11.3	2.56587	0	0	0	4.01118	4.9803	0.80541	0.420583	NA
WBGene00009491	ALG target 22G	F36G9.15	2.56587	0	0	0	4.01118	4.9803	0.80541	0.420583	NA
WBGene00010046	ALG Class 26G	F54D1.1	2.56587	0	0	0	4.01118	4.9803	0.80541	0.420583	NA
WBGene00010963	ALG target 22G	MTCE.25, nduo-4	2.56587	0	0	0	4.01118	4.9803	0.80541	0.420583	NA
WBGene00011533	ALG target 22G	T06E4.5	2.56587	0	0	0	4.01118	4.9803	0.80541	0.420583	NA
WBGene00045969	piRNA	21ur-1125, Y105C5A.79	2.56587	0	0	0	4.01118	4.9803	0.80541	0.420583	NA
WBGene00046215	piRNA	21ur-377, Y57G11C.103	2.56587	0	0	0	4.01118	4.9803	0.80541	0.420583	NA
WBGene00046244	piRNA	21ur-4326, F02H6.13	2.56587	0	0	0	4.01118	4.9803	0.80541	0.420583	NA
WBGene00047033	piRNA	21ur-5110, Y116A8B.12	2.56587	0	0	0	4.01118	4.9803	0.80541	0.420583	NA
WBGene00047180	piRNA	21ur-2921, Y57G11C.183	2.56587	0	0	0	4.01118	4.9803	0.80541	0.420583	NA
WBGene00048016	piRNA	21ur-2796, Y64G10A.82	2.56587	0	0	0	4.01118	4.9803	0.80541	0.420583	NA
WBGene00049434	piRNA	21ur-982, Y73F8A.375	2.56587	0	0	0	4.01118	4.9803	0.80541	0.420583	NA
WBGene00049844	piRNA	21ur-3334, Y40H7A.124	2.56587	0	0	0	4.01118	4.9803	0.80541	0.420583	NA
WBGene00050030	piRNA	21ur-441, C10G6.17	2.56587	0	0	0	4.01118	4.9803	0.80541	0.420583	NA
WBGene00050048	piRNA	21ur-1933, F55B11.51	2.56587	0	0	0	4.01118	4.9803	0.80541	0.420583	NA
WBGene00050740	piRNA	21ur-2053, Y116A8C.190	2.56587	0	0	0	4.01118	4.9803	0.80541	0.420583	NA
WBGene00165521	piRNA	21ur-11110, H20E11.4	2.56587	0	0	0	4.01118	4.9803	0.80541	0.420583	NA
WBGene00165557	piRNA	21ur-10667, Y51H4A.430	2.56587	0	0	0	4.01118	4.9803	0.80541	0.420583	NA
WBGene00165796	piRNA	21ur-9301, Y51H4A.442	2.56587	0	0	0	4.01118	4.9803	0.80541	0.420583	NA
WBGene00166155	piRNA	21ur-9803, Y51H4A.463	2.56587	0	0	0	4.01118	4.9803	0.80541	0.420583	NA
WBGene00166578	piRNA	21ur-8470, Y116A8C.238	2.56587	0	0	0	4.01118	4.9803	0.80541	0.420583	NA
WBGene00166636	piRNA	21ur-7935, Y116A8C.240	2.56587	0	0	0	4.01118	4.9803	0.80541	0.420583	NA
WBGene00167036	piRNA	21ur-12560, Y57G11B.133	2.56587	0	0	0	4.01118	4.9803	0.80541	0.420583	NA
WBGene00167223	piRNA	21ur-6679, Y57G11A.118	2.56587	0	0	0	4.01118	4.9803	0.80541	0.420583	NA
WBGene00167344	piRNA	21ur-9932, Y105C5B.777	2.56587	0	0	0	4.01118	4.9803	0.80541	0.420583	NA
WBGene00167362	piRNA	21ur-7001, Y57G11C.649	2.56587	0	0	0	4.01118	4.9803	0.80541	0.420583	NA
WBGene00167634	piRNA	21ur-12045, Y51H4A.548	2.56587	0	0	0	4.01118	4.9803	0.80541	0.420583	NA
WBGene00168149	piRNA	21ur-9125, Y51H4A.573	2.56587	0	0	0	4.01118	4.9803	0.80541	0.420583	NA
WBGene00168172	piRNA	21ur-7866, Y51H4A.574	2.56587	0	0	0	4.01118	4.9803	0.80541	0.420583	NA
WBGene00168723	piRNA	21ur-11343, C06E7.63	2.56587	0	0	0	4.01118	4.9803	0.80541	0.420583	NA
WBGene00168848	piRNA	21ur-10664, F38A5.16	2.56587	0	0	0	4.01118	4.9803	0.80541	0.420583	NA
WBGene00168878	piRNA	21ur-12462, Y105C5B.915	2.56587	0	0	0	4.01118	4.9803	0.80541	0.420583	NA
WBGene00169028	piRNA	21ur-15422, Y57G11C.756	2.56587	0	0	0	4.01118	4.9803	0.80541	0.420583	NA
WBGene00169175	piRNA	21ur-13919, K10B4.7	2.56587	0	0	0	4.01118	4.9803	0.80541	0.420583	NA
WBGene00169312	piRNA	21ur-8401, Y116A8C.316	2.56587	0	0	0	4.01118	4.9803	0.80541	0.420583	NA
WBGene00169325	piRNA	21ur-13401, Y105C5A.837	2.56587	0	0	0	4.01118	4.9803	0.80541	0.420583	NA
WBGene00169523	piRNA	21ur-5588, Y105C5A.856	2.56587	0	0	0	4.01118	4.9803	0.80541	0.420583	NA
WBGene00169907	piRNA	21ur-6410, C05B10.9	2.56587	0	0	0	4.01118	4.9803	0.80541	0.420583	NA
WBGene00170053	piRNA	21ur-13407, F36A4.18	2.56587	0	0	0	4.01118	4.9803	0.80541	0.420583	NA
WBGene00170175	piRNA	21ur-13137, T05A1.12	2.56587	0	0	0	4.01118	4.9803	0.80541	0.420583	NA
WBGene00170577	piRNA	21ur-6856, Y45F10B.47	2.56587	0	0	0	4.01118	4.9803	0.80541	0.420583	NA
WBGene00170803	piRNA	21ur-13060, LLC1.80	2.56587	0	0	0	4.01118	4.9803	0.80541	0.420583	NA
WBGene00171111	piRNA	21ur-10054, LLC1.85	2.56587	0	0	0	4.01118	4.9803	0.80541	0.420583	NA
WBGene00171219	piRNA	21ur-11992, C11D2.70	2.56587	0	0	0	4.01118	4.9803	0.80541	0.420583	NA
WBGene00171656	piRNA	21ur-11939, H35B03.15	2.56587	0	0	0	4.01118	4.9803	0.80541	0.420583	NA
WBGene00171760	piRNA	21ur-7471, AC7.57	2.56587	0	0	0	4.01118	4.9803	0.80541	0.420583	NA
WBGene00172220	piRNA	21ur-8802, T23G4.101	2.56587	0	0	0	4.01118	4.9803	0.80541	0.420583	NA
WBGene00172531	piRNA	21ur-12417, C09B9.68	2.56587	0	0	0	4.01118	4.9803	0.80541	0.420583	NA
WBGene00172696	piRNA	21ur-6398, Y105C5B.1218	2.56587	0	0	0	4.01118	4.9803	0.80541	0.420583	NA
WBGene00172712	piRNA	21ur-15669, Y116A8B.81	2.56587	0	0	0	4.01118	4.9803	0.80541	0.420583	NA
WBGene00172882	piRNA	21ur-6758, C46G7.97	2.56587	0	0	0	4.01118	4.9803	0.80541	0.420583	NA
WBGene00173230	piRNA	21ur-6569, Y105C5B.1266	2.56587	0	0	0	4.01118	4.9803	0.80541	0.420583	NA
WBGene00173252	piRNA	21ur-8296, Y64G10A.325	2.56587	0	0	0	4.01118	4.9803	0.80541	0.420583	NA
WBGene00173379	piRNA	21ur-6805, F55B11.122	2.56587	0	0	0	4.01118	4.9803	0.80541	0.420583	NA
WBGene00173810	piRNA	21ur-15050, C46A5.12	2.56587	0	0	0	4.01118	4.9803	0.80541	0.420583	NA
WBGene00173966	piRNA	21ur-11630, Y73B6BL.258	2.56587	0	0	0	4.01118	4.9803	0.80541	0.420583	NA
WBGene00174045	piRNA	21ur-10365, Y105C5B.1329	2.56587	0	0	0	4.01118	4.9803	0.80541	0.420583	NA
WBGene00174485	piRNA	21ur-6151, Y105C5B.1368	2.56587	0	0	0	4.01118	4.9803	0.80541	0.420583	NA
WBGene00194807	pre-miRNA	mir-2215, Y48C3A.21	2.56587	0	0	0	4.01118	4.9803	0.80541	0.420583	NA
WBGene00194829	pre-miRNA	F36H12.64, mir-2217.1	2.56587	0	0	0	4.01118	4.9803	0.80541	0.420583	NA
GCCCTTTGTACACACCGCCCGTC	23H-RNA	F31C3.7, F31C3.8, rrn-1.1, rrn-1.2	17.9611	35.5233	0.855345	2.48224	4.00571	1.15129	3.47931	0.000502699	0.00475644
WBGene00016420	ALG Class 26G	C34G6.3	7.69761	12.5376	0.855345	0.413706	4.0051	1.72137	2.32669	0.0199815	0.113911
WBGene00011911	ALG target 22G	T22B3.3	2.56587	4.17921	0.427673	0	3.99945	3.00087	1.33276	0.18261	NA
WBGene00077716	pre-miRNA	mir-1819, R11.5	2.56587	4.17921	0.427673	0	3.99945	3.00087	1.33276	0.18261	NA
MIMAT0000308	miRNA	miR-252-5p	28753.2	29202.3	2012.2	1635.38	3.98998	0.166839	23.9152	2.12948e-126	8.28975e-124
MIMAT0000305	miRNA	miR-249-3p	318.168	440.907	20.5283	27.3046	3.9899	0.357576	11.1582	6.5304e-29	3.4354e-27
WBGene00003263	pre-miRNA	mir-35, Y62F5A.2	16914.2	13108.1	981.509	932.079	3.97152	0.182429	21.7702	4.45119e-105	1.1663e-102
WBGene00168780	piRNA	21ur-9468, Y105C5B.908	43.6198	2.08961	0.855345	2.06853	3.95024	1.50697	2.62131	0.00875923	0.0586171
WBGene00003268	pre-miRNA	mir-40, Y62F5A.7	5218.98	3121.87	293.383	246.155	3.94987	0.265109	14.8991	3.34261e-50	3.27648e-48
MIMAT0000039	miRNA	miR-67-3p	726.142	844.201	66.2893	35.5787	3.94804	0.331448	11.9115	1.03142e-32	6.13669e-31
WBGene00011401	ALG Class 26G	T03F6.6	0	12.5376	0	0.827412	3.93168	2.74475	1.43244	0.152018	0.450761
WBGene00050103	piRNA	21ur-4733, Y73F8A.430	0	12.5376	0	0.827412	3.93168	2.74475	1.43244	0.152018	0.450761
TCCCTGCCCTTTGTACACACCG	23H-RNA	F31C3.7, F31C3.8, rrn-1.1, rrn-1.2	43.6198	14.6272	2.99371	0.827412	3.92416	1.17173	3.34903	0.000810962	0.00733689
WBGene00007082	ALG target 22G	acs-10, AH10.1	0	6.26882	0	0.413706	3.9238	3.52245	1.11394	0.265305	NA
WBGene00165552	piRNA	21ur-8773, Y105C5B.653	0	6.26882	0	0.413706	3.9238	3.52245	1.11394	0.265305	NA
WBGene00166599	piRNA	21ur-7150, Y37A1B.180	0	6.26882	0	0.413706	3.9238	3.52245	1.11394	0.265305	NA
WBGene00169201	piRNA	21ur-11852, Y105C5A.827	0	6.26882	0	0.413706	3.9238	3.52245	1.11394	0.265305	NA
WBGene00172031	piRNA	21ur-12123, Y73F8A.953	0	6.26882	0	0.413706	3.9238	3.52245	1.11394	0.265305	NA
CTTTTTTCACCAAGAACGAAACC	23H-RNA	E01G4.7	25.6587	37.6129	1.28302	2.89594	3.92171	1.02476	3.82696	0.000129734	0.00138637
MIMAT0019997	miRNA	miR-4811-3p	53.8833	35.5233	2.56604	3.30965	3.92124	0.853068	4.59663	4.29378e-06	5.78662e-05
MIMAT0000284	miRNA	miR-229-5p	9940.19	18470	1323.65	552.297	3.92076	0.733339	5.34645	8.96965e-08	1.4742e-06
WBGene00174726	piRNA	21ur-10371, T19E7.20	12.8294	6.26882	0.427673	0.827412	3.91484	1.76338	2.22008	0.0264133	0.139327
WBGene00168443	piRNA	21ur-15018, Y73F8A.723	12.8294	0	0.427673	0.413706	3.90955	2.46135	1.58838	0.112201	0.381898
CACGATCAGAAGGGATGTCACT	23H-RNA	E01G4.7	59.015	98.2115	5.55974	4.96447	3.90722	0.668459	5.84512	5.06189e-09	9.79663e-08
WBGene00171258	piRNA	21ur-7059, Y51H4A.726	38.4881	0	2.56604	0	3.90566	4.61302	0.84666	0.397184	0.720591
MIMAT0015119	miRNA	miR-247-5p	0	6.26882	0.427673	0	3.90475	3.52131	1.10889	0.267478	NA
MIMAT0019987	miRNA	miR-4805-3p	0	6.26882	0.427673	0	3.90475	3.52131	1.10889	0.267478	NA
MIMAT0019996	miRNA	miR-4811-5p	0	6.26882	0.427673	0	3.90475	3.52131	1.10889	0.267478	NA
WBGene00005257	WAGO Class 22G	M02H5.10, srh-34	0	6.26882	0.427673	0	3.90475	3.52131	1.10889	0.267478	NA
WBGene00008141	ALG target 22G	C47E8.1	0	6.26882	0.427673	0	3.90475	3.52131	1.10889	0.267478	NA
WBGene00009501	ALG target 22G	F37A8.1	0	6.26882	0.427673	0	3.90475	3.52131	1.10889	0.267478	NA
WBGene00167528	piRNA	21ur-6935, Y51H4A.543	0	6.26882	0.427673	0	3.90475	3.52131	1.10889	0.267478	NA
WBGene00169514	piRNA	21ur-15671, F02H6.54	0	6.26882	0.427673	0	3.90475	3.52131	1.10889	0.267478	NA
WBGene00169641	piRNA	21ur-10715, Y41E3.339	0	6.26882	0.427673	0	3.90475	3.52131	1.10889	0.267478	NA
WBGene00171106	piRNA	21ur-12712, H04M03.57	0	6.26882	0.427673	0	3.90475	3.52131	1.10889	0.267478	NA
WBGene00003327	pre-miRNA	C13B4.3, mir-234	43.6198	18.8065	0.427673	3.72335	3.89844	1.1964	3.25848	0.00112012	0.00978675
WBGene00166212	piRNA	21ur-7370, Y73F8A.583	12.8294	0	0.855345	0	3.89644	2.75648	1.41355	0.157493	0.459953
WBGene00166984	piRNA	21ur-9228, Y57G11A.115	12.8294	0	0.855345	0	3.89644	2.75648	1.41355	0.157493	0.459953
WBGene00016868	CSR Class 22G	C52B9.8	0	12.5376	0.855345	0	3.89588	2.74556	1.41897	0.155907	0.457118
WBGene00168098	piRNA	21ur-7652, Y17G9A.48	0	12.5376	0.855345	0	3.89588	2.74556	1.41897	0.155907	0.457118
WBGene00170387	piRNA	21ur-9751, Y57G11C.845	0	12.5376	0.855345	0	3.89588	2.74556	1.41897	0.155907	0.457118
MIMAT0000011	miRNA	miR-40-3p	595287	402732	37381.6	29979.2	3.88908	0.225513	17.2455	1.21022e-66	1.61659e-64
WBGene00049956	piRNA	21ur-1574, Y73F8A.415	10.2635	2.08961	0	0.827412	3.87702	2.4002	1.61529	0.106248	0.370078
WBGene00023069	23H target 22G	F55A4.9, rncs-1	17.9611	31.3441	2.13836	1.24112	3.87608	1.13458	3.41632	0.000634733	0.00584735
MIMAT0000294	miRNA	miR-239a-5p	2170.73	1692.58	160.377	103.84	3.86984	0.266652	14.5127	1.0068e-47	8.9658e-46
AATGACTACTGTAGCGCTTGTG	23H-RNA	CELE1	0	2.08961	0	0	3.86144	4.99005	0.773827	0.439033	NA
ACGATTTTGAACGTATAGACCCA	23H-RNA	Y29A2AR.16	0	2.08961	0	0	3.86144	4.99005	0.773827	0.439033	NA
CTCAAAATCCTGAGCCTCACTCA	23H-RNA	M4.2, puf-4	0	2.08961	0	0	3.86144	4.99005	0.773827	0.439033	NA
MIMAT0011453	miRNA	miR-2209b-5p	0	2.08961	0	0	3.86144	4.99005	0.773827	0.439033	NA
MIMAT0019995	miRNA	miR-4810a	0	2.08961	0	0	3.86144	4.99005	0.773827	0.439033	NA
WBGene00000771	ALG target 22G	C30B5.3, cpb-2	0	2.08961	0	0	3.86144	4.99005	0.773827	0.439033	NA
WBGene00004906	ALG target 22G	snf-7, ZK1010.9	0	2.08961	0	0	3.86144	4.99005	0.773827	0.439033	NA
WBGene00007308	ALG target 22G	C04G2.9	0	2.08961	0	0	3.86144	4.99005	0.773827	0.439033	NA
WBGene00007538	ALG target 22G	C12D8.9	0	2.08961	0	0	3.86144	4.99005	0.773827	0.439033	NA
WBGene00011414	ALG target 22G	T04A8.13	0	2.08961	0	0	3.86144	4.99005	0.773827	0.439033	NA
WBGene00011749	ALG target 22G	ssp-36, T13F2.12	0	2.08961	0	0	3.86144	4.99005	0.773827	0.439033	NA
WBGene00016356	ALG Class 26G	C33F10.8	0	2.08961	0	0	3.86144	4.99005	0.773827	0.439033	NA
WBGene00016963	ALG target 22G	C56C10.6	0	2.08961	0	0	3.86144	4.99005	0.773827	0.439033	NA
WBGene00020377	ALG target 22G	T09B4.3	0	2.08961	0	0	3.86144	4.99005	0.773827	0.439033	NA
WBGene00021288	ALG target 22G	clec-123, Y25C1A.1	0	2.08961	0	0	3.86144	4.99005	0.773827	0.439033	NA
WBGene00021880	ALG Class 26G	Y54G2A.15	0	2.08961	0	0	3.86144	4.99005	0.773827	0.439033	NA
WBGene00045793	piRNA	21ur-3911, Y37A1A.8	0	2.08961	0	0	3.86144	4.99005	0.773827	0.439033	NA
WBGene00047090	piRNA	21ur-3447, Y40H7A.60	0	2.08961	0	0	3.86144	4.99005	0.773827	0.439033	NA
WBGene00047585	piRNA	21ur-5365, C46G7.21	0	2.08961	0	0	3.86144	4.99005	0.773827	0.439033	NA
WBGene00048106	piRNA	21ur-3226, T06A10.26	0	2.08961	0	0	3.86144	4.99005	0.773827	0.439033	NA
WBGene00050879	ALG target 22G	D1081.11	0	2.08961	0	0	3.86144	4.99005	0.773827	0.439033	NA
WBGene00166110	piRNA	21ur-6312, Y40H7A.171	0	2.08961	0	0	3.86144	4.99005	0.773827	0.439033	NA
WBGene00166406	piRNA	21ur-13443, Y105C5B.717	0	2.08961	0	0	3.86144	4.99005	0.773827	0.439033	NA
WBGene00166672	piRNA	21ur-13761, Y57G11A.110	0	2.08961	0	0	3.86144	4.99005	0.773827	0.439033	NA
WBGene00166758	piRNA	21ur-12808, Y43D4A.87	0	2.08961	0	0	3.86144	4.99005	0.773827	0.439033	NA
WBGene00166868	piRNA	21ur-15645, Y73F8A.631	0	2.08961	0	0	3.86144	4.99005	0.773827	0.439033	NA
WBGene00167078	piRNA	21ur-7313, Y105C5A.663	0	2.08961	0	0	3.86144	4.99005	0.773827	0.439033	NA
WBGene00167174	piRNA	21ur-13542, Y73F8A.642	0	2.08961	0	0	3.86144	4.99005	0.773827	0.439033	NA
WBGene00167388	piRNA	21ur-12361, F20A1.11	0	2.08961	0	0	3.86144	4.99005	0.773827	0.439033	NA
WBGene00167428	piRNA	21ur-13264, H12I19.69	0	2.08961	0	0	3.86144	4.99005	0.773827	0.439033	NA
WBGene00168774	piRNA	21ur-10834, Y105C5B.907	0	2.08961	0	0	3.86144	4.99005	0.773827	0.439033	NA
WBGene00169774	piRNA	21ur-8393, Y105C5A.873	0	2.08961	0	0	3.86144	4.99005	0.773827	0.439033	NA
WBGene00170434	piRNA	21ur-13110, R05A10.91	0	2.08961	0	0	3.86144	4.99005	0.773827	0.439033	NA
WBGene00170525	piRNA	21ur-11299, Y105C5A.937	0	2.08961	0	0	3.86144	4.99005	0.773827	0.439033	NA
WBGene00170848	piRNA	21ur-12179, Y64G10A.271	0	2.08961	0	0	3.86144	4.99005	0.773827	0.439033	NA
WBGene00171809	piRNA	21ur-12004, LLC1.93	0	2.08961	0	0	3.86144	4.99005	0.773827	0.439033	NA
WBGene00171827	piRNA	21ur-13518, Y51H4A.767	0	2.08961	0	0	3.86144	4.99005	0.773827	0.439033	NA
WBGene00172554	piRNA	21ur-14734, Y37A1A.127	0	2.08961	0	0	3.86144	4.99005	0.773827	0.439033	NA
WBGene00172596	piRNA	21ur-7417, Y64G10A.310	0	2.08961	0	0	3.86144	4.99005	0.773827	0.439033	NA
WBGene00172831	piRNA	21ur-12054, T06A10.89	0	2.08961	0	0	3.86144	4.99005	0.773827	0.439033	NA
WBGene00172889	piRNA	21ur-12831, Y45F10B.55	0	2.08961	0	0	3.86144	4.99005	0.773827	0.439033	NA
WBGene00173221	piRNA	21ur-9766, Y57G11C.1014	0	2.08961	0	0	3.86144	4.99005	0.773827	0.439033	NA
WBGene00173498	piRNA	21ur-11188, Y51H4A.855	0	2.08961	0	0	3.86144	4.99005	0.773827	0.439033	NA
WBGene00173680	piRNA	21ur-5825, Y57G11C.1050	0	2.08961	0	0	3.86144	4.99005	0.773827	0.439033	NA
WBGene00174012	piRNA	21ur-13420, Y116A8C.430	0	2.08961	0	0	3.86144	4.99005	0.773827	0.439033	NA
WBGene00174052	piRNA	21ur-7419, Y43D4A.148	0	2.08961	0	0	3.86144	4.99005	0.773827	0.439033	NA
WBGene00174651	piRNA	21ur-11081, Y65A5A.23	0	2.08961	0	0	3.86144	4.99005	0.773827	0.439033	NA
WBGene00174981	piRNA	21ur-14016, Y45F10D.139	0	2.08961	0	0	3.86144	4.99005	0.773827	0.439033	NA
WBGene00194699	ERGO target 22G	Y43F8B.22	0	2.08961	0	0	3.86144	4.99005	0.773827	0.439033	NA
WBGene00003312	pre-miRNA	B0395.4, mir-84	821.079	1546.31	87.6729	75.7082	3.85896	0.324703	11.8846	1.42327e-32	8.35866e-31
MIMAT0011462	miRNA	miR-2220-3p	102.635	31.3441	2.13836	7.033	3.85815	0.893743	4.31684	1.58278e-05	0.000194524
WBGene00003353	pre-miRNA	F25D1.6, mir-259	118.03	125.376	9.83647	7.033	3.85293	0.527618	7.3025	2.82465e-13	7.95163e-12
MIMAT0004216	miRNA	miR-255-3p	741.537	599.717	52.6037	40.5432	3.84709	0.283538	13.5682	6.18599e-42	4.60569e-40
WBGene00047785	piRNA	21ur-4607, Y40H7A.72	25.6587	10.448	0.855345	1.65482	3.833	1.3354	2.87031	0.00410075	0.0306824
MIMAT0020135	miRNA	miR-4929	7.69761	4.17921	0	0.827412	3.82782	2.34726	1.63076	0.10294	0.361616
WBGene00170367	piRNA	21ur-8698, Y67A10A.248	17.9611	0	0.427673	0.827412	3.81836	2.18812	1.74504	0.0809781	0.31001
WBGene00020707	ALG Class 26G	T22H9.3, wago-10	7.69761	4.17921	0.427673	0.413706	3.81026	2.13911	1.78123	0.0748744	0.294504
WBGene00170939	piRNA	21ur-5687, T13A10.41	17.9611	0	0.855345	0.413706	3.80668	2.18885	1.73913	0.0820124	0.31309
MIMAT0000001	miRNA	let-7-5p	200454	189918	14023.8	13977.5	3.80128	0.1358	27.9917	2.0477e-172	1.21304e-169
GACAGTCCCCACTCTTCTCGA	23H-RNA	F31C3.7, F31C3.8, rrn-1.1, rrn-1.2	35.9222	45.9713	2.99371	2.89594	3.80089	0.862883	4.40487	1.05845e-05	0.000133408
WBGene00003343	pre-miRNA	mir-249, Y48D7A.3	5.13174	12.5376	1.28302	0	3.79991	2.03188	1.87014	0.061464	0.257735
WBGene00194805	pre-miRNA	mir-2210, ZK593.12	7.69761	4.17921	0.855345	0	3.79619	2.34777	1.61693	0.105893	0.369453
MIMAT0000009	miRNA	miR-38-3p	57429.3	33945.7	3966.24	2724.67	3.77149	0.277062	13.6124	3.37895e-42	2.52957e-40
MIMAT0015266	miRNA	miR-1822-5p	20.527	173.437	6.41509	7.86041	3.77136	0.895301	4.21239	2.52685e-05	0.000302534
WBGene00047683	piRNA	21ur-401, B0350.14	15.3952	2.08961	0.855345	0.413706	3.76794	1.93205	1.95023	0.0511488	0.2259
MIMAT0000033	miRNA	miR-61-3p	191245	126818	11283.3	12193.2	3.76	0.217791	17.2643	8.73741e-67	1.17869e-64
WBGene00002993	pre-miRNA	F59G1.6, lin-4	1216.22	1011.37	95.7987	68.6752	3.75923	0.257991	14.5712	4.28423e-48	3.84031e-46
WBGene00047471	piRNA	21ur-990, Y57G11C.212	23.0928	0	1.28302	0.413706	3.7531	2.03922	1.84046	0.0657005	0.269873
MIMAT0015121	miRNA	miR-360-5p	184.743	137.914	10.6918	13.2386	3.74908	0.470415	7.96973	1.59017e-15	5.40301e-14
WBGene00046467	piRNA	21ur-1494, T06A10.16	33.3563	12.5376	2.99371	0.413706	3.74751	1.3186	2.84204	0.00448253	0.0331566
TCCTTCGATGTCGGCTCTTCCT	23H-RNA	F31C3.10, F31C3.9, rrn-3.1, rrn-3.56	295.075	192.244	12.4025	23.9949	3.73836	0.468238	7.98389	1.41793e-15	4.84193e-14
WBGene00003293	pre-miRNA	mir-65, Y48G9A.14	3204.77	2455.29	251.472	173.343	3.73565	0.247829	15.0735	2.42105e-51	2.44347e-49
MIMAT0000008	miRNA	miR-37-3p	726670	527496	52104.2	42816.9	3.72385	0.206637	18.0212	1.32768e-72	1.96627e-70
MIMAT0000028	miRNA	miR-56-3p	1.40183e+06	937838	100621	76885.2	3.72036	0.234454	15.8682	1.0525e-56	1.15648e-54
WBGene00002285	pre-miRNA	C05G5.6, let-7	531.135	330.158	34.6415	30.6142	3.71933	0.35455	10.4903	9.57405e-26	4.70926e-24
MIMAT0020301	miRNA	miR-1-5p	310.47	252.842	13.2579	29.7868	3.70697	0.453922	8.16655	3.17335e-16	1.12013e-14
WBGene00021019	ERGO Class 26G	W04B5.2	2.56587	35.5233	1.71069	1.24112	3.70639	1.48381	2.49789	0.0124934	0.0777342
WBGene00003284	pre-miRNA	F09A5.8, mir-56	6989.43	4187.57	482.415	376.472	3.70155	0.267246	13.8507	1.25895e-43	9.85819e-42
MIMAT0011436	miRNA	miR-2210-3p	751.8	710.466	61.5849	51.2995	3.69532	0.252259	14.6489	1.36856e-48	1.26848e-46
MIMAT0000012	miRNA	miR-41-3p	5447.34	3040.38	376.78	278.424	3.69491	0.292499	12.6322	1.40289e-36	9.27881e-35
WBGene00045343	pre-miRNA	C39D10.12, mir-786	7125.42	4908.49	476.855	453.422	3.69286	0.218099	16.932	2.61161e-64	3.3569e-62
MIMAT0004219	miRNA	miR-784-5p	713.312	480.61	42.3396	50.4721	3.68234	0.312552	11.7815	4.86028e-32	2.77077e-30
WBGene00255577	pre-miRNA	mir-8205, W09C5.16	7.69761	8.35843	0.427673	0.827412	3.67566	1.83698	2.00092	0.045401	0.209407
WBGene00206507	ERGO Class 26G	Y51A2A.16	7.69761	77.3154	2.56604	4.13706	3.675	1.13039	3.25108	0.00114968	0.0100284
WBGene00012642	ALG Class 26G	Y39A1A.2	0	10.448	0	0.827412	3.67013	2.89118	1.26942	0.20429	0.531395
MIMAT0000056	miRNA	miR-83-3p	3402.35	1769.9	252.327	154.312	3.66842	0.34014	10.785	4.0511e-27	2.06727e-25
MIMAT0011452	miRNA	miR-2217a-3p	7.69761	8.35843	0.855345	0.413706	3.66556	1.83765	1.9947	0.0460759	0.211517
MIMAT0000015	miRNA	miR-44-3p	245241	160722	16137.8	15918.2	3.66267	0.21888	16.7337	7.44454e-63	9.30567e-61
MIMAT0000016	miRNA	miR-45-3p	245241	160722	16137.8	15918.2	3.66267	0.21888	16.7337	7.44454e-63	9.30567e-61
MIMAT0000289	miRNA	miR-234-3p	6371.06	3892.94	458.893	353.719	3.65849	0.265077	13.8016	2.49185e-43	1.91816e-41
WBGene00046652	piRNA	21ur-187, C10G6.5	0	10.448	0.427673	0.413706	3.6568	2.56074	1.42802	0.153285	0.453347
WBGene00170361	piRNA	21ur-7527, C08F11.93	10.2635	20.8961	0	2.48224	3.65035	1.65292	2.20842	0.0272149	0.142179
WBGene00077723	pre-miRNA	B0286.7, mir-1830	46.1857	89.8531	3.84905	7.033	3.64873	0.741663	4.91966	8.6693e-07	1.27421e-05
WBGene00003307	pre-miRNA	C12C8.4, mir-79	266.851	244.484	23.0943	17.7894	3.64459	0.376185	9.6883	3.38117e-22	1.49089e-20
WBGene00045352	pre-miRNA	F13D11.5, mir-791	56.4492	54.3298	5.98742	2.89594	3.64251	0.770111	4.72985	2.24684e-06	3.14303e-05
WBGene00045350	pre-miRNA	mir-788, T01B10.6	212.967	254.932	23.0943	14.4797	3.64145	0.417546	8.72108	2.75556e-18	1.06964e-16
WBGene00172269	piRNA	21ur-9673, K08B4.29	10.2635	10.448	0	1.65482	3.6392	1.8674	1.94881	0.0513186	0.22643
WBGene00003289	pre-miRNA	F55A11.9, mir-61	1926.97	1349.89	146.692	116.665	3.63628	0.255351	14.2403	5.14997e-46	4.25263e-44
WBGene00165651	piRNA	21ur-5733, C47A4.79	323.3	112.839	6.41509	28.5457	3.63624	0.707692	5.13817	2.77432e-07	4.34483e-06
WBGene00012345	ALG target 22G	W08E3.4	0	10.448	0.855345	0	3.63331	2.8917	1.25646	0.208948	0.538678
WBGene00165088	piRNA	21ur-7598, Y51H4A.409	0	10.448	0.855345	0	3.63331	2.8917	1.25646	0.208948	0.538678
MIMAT0000002	miRNA	lin-4-5p	221717	136850	17638.5	11309.1	3.63072	0.278605	13.0318	8.06874e-39	5.72586e-37
MIMAT0000037	miRNA	miR-65-5p	644983	533615	54329	41066.1	3.62701	0.19697	18.414	1.01464e-75	1.57097e-73
MIMAT0000020	miRNA	miR-49-3p	21132.5	12947.2	1652.1	1121.97	3.61874	0.273785	13.2174	6.95897e-40	5.07037e-38
WBGene00166958	piRNA	21ur-11304, Y41E3.267	10.2635	0	0	0.827412	3.60958	2.93401	1.23025	0.218602	0.548317
WBGene00171386	piRNA	21ur-15344, AC7.51	10.2635	0	0	0.827412	3.60958	2.93401	1.23025	0.218602	0.548317
MIMAT0032833	miRNA	miR-8208-5p	15.3952	25.0753	0.427673	2.89594	3.60635	1.32187	2.72821	0.00636789	0.0448598
WBGene00044205	ALG Class 26G	T13F3.8	33.3563	22.9857	1.71069	2.89594	3.60553	1.03173	3.49463	0.000474712	0.00451988
WBGene00003309	pre-miRNA	mir-81, T07D1.6	464.423	357.323	34.6415	33.0965	3.59836	0.317368	11.3381	8.49442e-30	4.57456e-28
MIMAT0022193	miRNA	miR-5551-5p	387.447	336.427	29.5094	30.2005	3.59813	0.318456	11.2986	1.3326e-29	7.12025e-28
MIMAT0032828	miRNA	miR-8205-3p	5.13174	0	0	0.413706	3.59347	3.77686	0.951446	0.341378	NA
WBGene00007269	ALG target 22G	C03C10.2	5.13174	0	0	0.413706	3.59347	3.77686	0.951446	0.341378	NA
WBGene00007733	ALG target 22G	C25G4.6, smz-1	5.13174	0	0	0.413706	3.59347	3.77686	0.951446	0.341378	NA
WBGene00046744	piRNA	21ur-2411, C08F11.27	5.13174	0	0	0.413706	3.59347	3.77686	0.951446	0.341378	NA
WBGene00049669	piRNA	21ur-957, F52B11.31	5.13174	0	0	0.413706	3.59347	3.77686	0.951446	0.341378	NA
WBGene00050853	piRNA	21ur-4218, H25K10.57	5.13174	0	0	0.413706	3.59347	3.77686	0.951446	0.341378	NA
WBGene00167317	piRNA	21ur-6937, Y105C5B.776	5.13174	0	0	0.413706	3.59347	3.77686	0.951446	0.341378	NA
WBGene00167775	piRNA	21ur-6554, Y116A8C.277	5.13174	0	0	0.413706	3.59347	3.77686	0.951446	0.341378	NA
WBGene00169629	piRNA	21ur-9619, F55B11.99	5.13174	0	0	0.413706	3.59347	3.77686	0.951446	0.341378	NA
WBGene00171108	piRNA	21ur-8315, Y73B6BL.193	5.13174	0	0	0.413706	3.59347	3.77686	0.951446	0.341378	NA
WBGene00172987	piRNA	21ur-11657, H35B03.18	5.13174	0	0	0.413706	3.59347	3.77686	0.951446	0.341378	NA
WBGene00174371	piRNA	21ur-6248, Y73B6BL.262	5.13174	0	0	0.413706	3.59347	3.77686	0.951446	0.341378	NA
WBGene00174413	piRNA	21ur-8610, Y116A8C.446	5.13174	0	0	0.413706	3.59347	3.77686	0.951446	0.341378	NA
WBGene00219250	pre-miRNA	mir-4810.1, Y59E1B.9	5.13174	0	0	0.413706	3.59347	3.77686	0.951446	0.341378	NA
MIMAT0000004	miRNA	miR-2-3p	5149.7	4198.02	445.207	330.965	3.59	0.215586	16.6522	2.91465e-62	3.51434e-60
MIMAT0000701	miRNA	miR-359	7079.24	5533.28	470.012	579.188	3.58705	0.203531	17.6241	1.60863e-69	2.25954e-67
WBGene00050319	piRNA	21ur-4485, R05A10.59	189.874	89.8531	13.6855	9.51524	3.58666	0.569234	6.30086	2.95996e-10	6.49429e-09
WBGene00050587	piRNA	21ur-3916, M199.62	10.2635	0	0.427673	0.413706	3.58569	2.60015	1.37903	0.167886	0.475556
WBGene00172496	piRNA	21ur-6839, Y105C5B.1201	10.2635	0	0.427673	0.413706	3.58569	2.60015	1.37903	0.167886	0.475556
WBGene00172509	piRNA	21ur-7042, C02B10.61	10.2635	0	0.427673	0.413706	3.58569	2.60015	1.37903	0.167886	0.475556
WBGene00003273	pre-miRNA	mir-45, ZK930.11	2098.88	1657.06	152.251	160.932	3.58297	0.21111	16.972	1.32238e-64	1.73244e-62
WBGene00047238	piRNA	21ur-5206, Y51H4A.148	15.3952	0	0.855345	0.413706	3.58281	2.26542	1.58152	0.113759	0.384797
WBGene00018083	ALG target 22G	F36A4.4	15.3952	0	1.28302	0	3.57457	2.58565	1.38246	0.16683	0.474543
WBGene00169510	piRNA	21ur-6741, Y37A1A.106	15.3952	0	1.28302	0	3.57457	2.58565	1.38246	0.16683	0.474543
WBGene00170385	piRNA	21ur-10450, C06A12.14	15.3952	0	1.28302	0	3.57457	2.58565	1.38246	0.16683	0.474543
WBGene00010672	ALG target 22G	K08E7.4	5.13174	0	0.427673	0	3.57327	3.77503	0.946555	0.343865	NA
WBGene00015627	ALG target 22G	C09B9.2	5.13174	0	0.427673	0	3.57327	3.77503	0.946555	0.343865	NA
WBGene00018359	ALG target 22G	F42G8.8	5.13174	0	0.427673	0	3.57327	3.77503	0.946555	0.343865	NA
WBGene00046134	piRNA	21ur-3999, Y57G11C.97	5.13174	0	0.427673	0	3.57327	3.77503	0.946555	0.343865	NA
WBGene00047567	piRNA	21ur-987, C10G6.8	5.13174	0	0.427673	0	3.57327	3.77503	0.946555	0.343865	NA
WBGene00048977	piRNA	21ur-893, H12I19.38	5.13174	0	0.427673	0	3.57327	3.77503	0.946555	0.343865	NA
WBGene00166072	piRNA	21ur-10340, Y43D4A.80	5.13174	0	0.427673	0	3.57327	3.77503	0.946555	0.343865	NA
WBGene00166770	piRNA	21ur-7568, Y9C9A.54	5.13174	0	0.427673	0	3.57327	3.77503	0.946555	0.343865	NA
WBGene00167267	piRNA	21ur-9447, Y105C5B.772	5.13174	0	0.427673	0	3.57327	3.77503	0.946555	0.343865	NA
WBGene00168048	piRNA	21ur-14321, Y105C5A.727	5.13174	0	0.427673	0	3.57327	3.77503	0.946555	0.343865	NA
WBGene00171941	piRNA	21ur-8163, W03F8.60	5.13174	0	0.427673	0	3.57327	3.77503	0.946555	0.343865	NA
WBGene00174247	piRNA	21ur-10302, Y105C5A.1216	5.13174	0	0.427673	0	3.57327	3.77503	0.946555	0.343865	NA
MIMAT0031891	miRNA	miR-254-5p	10.2635	0	0.855345	0	3.57261	2.93439	1.21749	0.223416	0.555179
WBGene00050428	piRNA	21ur-2497, Y40H7A.138	10.2635	0	0.855345	0	3.57261	2.93439	1.21749	0.223416	0.555179
WBGene00167577	piRNA	21ur-8378, Y41E3.285	10.2635	0	0.855345	0	3.57261	2.93439	1.21749	0.223416	0.555179
WBGene00171269	piRNA	21ur-6684, Y37A1B.270	10.2635	0	0.855345	0	3.57261	2.93439	1.21749	0.223416	0.555179
WBGene00172286	piRNA	21ur-6246, Y105C5A.1069	10.2635	0	0.855345	0	3.57261	2.93439	1.21749	0.223416	0.555179
WBGene00174603	piRNA	21ur-10706, Y105C5A.1238	10.2635	0	0.855345	0	3.57261	2.93439	1.21749	0.223416	0.555179
MIMAT0020006	miRNA	miR-4816-3p	123.162	142.093	16.2516	6.20559	3.56563	0.585329	6.09167	1.11738e-09	2.3458e-08
MIMAT0000295	miRNA	miR-239b-5p	220.665	83.5843	11.9748	13.6523	3.56265	0.585912	6.08052	1.1979e-09	2.50328e-08
MIMAT0019990	miRNA	miR-4807	169.347	261.201	17.5346	19.0305	3.56155	0.427235	8.33628	7.66665e-17	2.80801e-15
WBGene00164992	piRNA	21ur-9698, Y40H7A.148	0	14.6272	0.427673	0.827412	3.56098	2.26382	1.573	0.11572	0.38844
MIMAT0000054	miRNA	miR-81-3p	632808	535815	48325.3	51186.2	3.5538	0.157	22.6356	1.93259e-113	5.72425e-111
WBGene00003272	pre-miRNA	mir-44, ZK930.10	2032.17	1402.13	144.126	148.934	3.54937	0.242644	14.6279	1.86477e-48	1.7052e-46
WBGene00173954	piRNA	21ur-13522, Y57G11C.1072	25.6587	4.17921	1.28302	1.24112	3.54645	1.50187	2.36136	0.0182081	0.105658
CCCTTTGTACACACCGCCCGTC	23H-RNA	F31C3.7, F31C3.8, rrn-1.1, rrn-1.2	35.9222	4.17921	3.42138	0	3.54479	1.71156	2.07109	0.0383502	0.184571
WBGene00219245	pre-miRNA	F56C3.13, mir-2221	7.69761	2.08961	0	0.827412	3.54291	2.55714	1.38549	0.165901	0.473319
MIMAT0020349	miRNA	miR-790-3p	372.051	645.688	45.761	41.7843	3.54256	0.35093	10.0948	5.82625e-24	2.73733e-22
MIMAT0004221	miRNA	miR-786-3p	27136.7	20210.7	2199.95	1864.16	3.54218	0.199714	17.7363	2.20027e-70	3.15566e-68
MIMAT0000055	miRNA	miR-82-3p	626812	503976	47703.5	49624.9	3.53832	0.167712	21.0976	8.37298e-99	1.78253e-96
WBGene00003264	pre-miRNA	mir-36, Y62F5A.3	1303.46	863.008	109.484	76.9493	3.53749	0.298429	11.8537	2.05861e-32	1.19355e-30
MIMAT0000046	miRNA	miR-74-3p	2706.99	1328.99	205.283	142.729	3.53484	0.341123	10.3624	3.67697e-25	1.77027e-23
WBGene00003342	pre-miRNA	AH9.5, mir-248	6147.83	3959.8	427.673	444.32	3.53441	0.23618	14.9649	1.24427e-50	1.24655e-48
MIMAT0000697	miRNA	miR-355-5p	6817.52	4726.69	497.811	500.17	3.53152	0.215765	16.3674	3.26672e-60	3.80419e-58
WBGene00003267	pre-miRNA	mir-39, Y62F5A.6	8554.61	6153.89	683.421	593.668	3.52541	0.211104	16.6999	1.31298e-62	1.61165e-60
MIMAT0000304	miRNA	miR-248	5870.71	7211.23	517.912	620.145	3.52315	0.191033	18.4426	5.97627e-76	9.46823e-74
MIMAT0006591	miRNA	miR-1824-5p	107.767	62.6882	9.83647	4.96447	3.52225	0.670657	5.25194	1.50507e-07	2.42109e-06
WBGene00047089	piRNA	21ur-1360, Y105C5A.177	10.2635	4.17921	0.427673	0.827412	3.50937	1.93302	1.81548	0.06945	0.279544
WBGene00049534	piRNA	21ur-761, Y67A10A.112	10.2635	4.17921	0.427673	0.827412	3.50937	1.93302	1.81548	0.06945	0.279544
WBGene00194700	ALG Class 26G	B0025.5	23.0928	10.448	0.855345	2.06853	3.50713	1.34491	2.6077	0.00911535	0.0604069
MIMAT0000013	miRNA	miR-42-3p	24014	16000.1	1951.47	1585.73	3.49971	0.2304	15.1897	4.13581e-52	4.26897e-50
WBGene00015558	ALG target 22G	C06G4.4	28.2246	0	0	2.48224	3.49303	2.21243	1.57882	0.114377	0.385854
MIMAT0006769	miRNA	miR-1829a-3p	946.806	612.255	69.7106	68.6752	3.49155	0.293507	11.896	1.24182e-32	7.35642e-31
MIMAT0019999	miRNA	miR-4812-3p	28.2246	14.6272	2.13836	1.65482	3.49022	1.16551	2.99458	0.00274823	0.0218348
MIMAT0000059	miRNA	miR-86-5p	18928.4	16718.9	1491.29	1682.96	3.48918	0.16083	21.6948	2.29511e-104	5.7909e-102
MIMAT0000301	miRNA	miR-245-3p	14104.6	9549.5	1244.1	863.404	3.48835	0.252415	13.8199	1.93343e-43	1.49676e-41
WBGene00165146	piRNA	21ur-7805, Y105C5B.621	7.69761	6.26882	0	1.24112	3.4831	2.15927	1.61309	0.106724	0.370853
TCGAGAAATGACGAGAAATTCAC	23H-RNA	Unknown_RE4	64.1468	62.6882	5.98742	5.37818	3.48029	0.676852	5.14188	2.71998e-07	4.26464e-06
MIMAT0019998	miRNA	miR-4812-5p	120.596	142.093	12.8302	10.7564	3.47993	0.489901	7.10335	1.21771e-12	3.2405e-11
WBGene00003265	pre-miRNA	mir-37, Y62F5A.4	4813.57	3723.68	417.409	348.34	3.47843	0.206237	16.8662	7.97357e-64	1.01533e-61
MIMAT0011427	miRNA	miR-2208a-5p	30.7905	20.8961	2.56604	2.06853	3.47479	1.04887	3.31291	0.000923321	0.00823314
MIMAT0000007	miRNA	miR-36-3p	261578	183672	22158.1	17956.1	3.47242	0.21604	16.073	3.94275e-58	4.36748e-56
WBGene00009938	ALG target 22G	F52F12.5	2.56587	2.08961	0	0.413706	3.4712	3.38209	1.02635	0.304728	NA
GATTTAGCGCCCCGACATTGA	23H-RNA	F31C3.10, F31C3.9, rrn-3.1, rrn-3.56	79.542	56.4194	7.69811	4.55077	3.47013	0.692392	5.01181	5.39211e-07	8.17213e-06
MIMAT0015096	miRNA	miR-46-5p	2234.87	1853.48	199.723	170.033	3.4663	0.207308	16.7205	9.29472e-63	1.15128e-60
WBGene00009079	ALG Class 26G	F23B12.1	5.13174	4.17921	0.427673	0.413706	3.46489	2.29027	1.51287	0.130312	0.413965
WBGene00045341	pre-miRNA	C18A11.8, mir-784	5.13174	4.17921	0.427673	0.413706	3.46489	2.29027	1.51287	0.130312	0.413965
MIMAT0000749	miRNA	lsy-6-3p	246.324	158.81	18.3899	18.2031	3.46445	0.434172	7.97945	1.4699e-15	5.00685e-14
MIMAT0019994	miRNA	miR-4809-3p	25.6587	25.0753	1.28302	3.30965	3.46212	1.08995	3.17639	0.0014912	0.0126906
WBGene00044447	ALG Class 26G	ZK688.10	2.56587	25.0753	2.13836	0.413706	3.45654	1.67484	2.06381	0.0390361	0.186884
WBGene00166080	piRNA	21ur-8949, Y105C5B.686	12.8294	10.448	1.71069	0.413706	3.45553	1.57584	2.19281	0.028321	0.146184
MIMAT0049029	miRNA	miR-55b	2.56587	2.08961	0.427673	0	3.4532	3.38035	1.02155	0.306994	NA
WBGene00019026	ALG Class 26G	F58A6.9	2.56587	2.08961	0.427673	0	3.4532	3.38035	1.02155	0.306994	NA
WBGene00003280	pre-miRNA	mir-52, Y37A1B.16	574.755	633.151	64.5786	45.9214	3.45185	0.288174	11.9784	4.6137e-33	2.78149e-31
WBGene00194823	pre-miRNA	mir-2208.2, Y55F3AM.17	12.8294	14.6272	1.28302	1.24112	3.44534	1.39014	2.47842	0.0131965	0.081617
WBGene00170668	piRNA	21ur-7246, R05A10.92	23.0928	0	0.855345	1.24112	3.44313	1.95864	1.75792	0.0787617	0.304628
WBGene00172672	piRNA	21ur-6821, Y105C5B.1216	100.069	56.4194	8.55345	5.79188	3.44238	0.665795	5.17033	2.33681e-07	3.68934e-06
MIMAT0000010	miRNA	miR-39-3p	979934	733519	84995.7	72761.8	3.44112	0.194527	17.6897	5.03709e-70	7.149e-68
WBGene00173134	piRNA	21ur-9712, Y73B6BL.232	10.2635	12.5376	1.28302	0.827412	3.43813	1.52353	2.25669	0.0240275	0.130532
WBGene00049422	piRNA	21ur-2414, Y105C5B.447	64.1468	66.8674	4.7044	7.44671	3.42953	0.681867	5.02962	4.91457e-07	7.49004e-06
WBGene00023454	pre-miRNA	F25G6.10, mir-357	177.045	248.663	20.1006	20.2716	3.40198	0.409555	8.30653	9.85407e-17	3.57079e-15
WBGene00003335	pre-miRNA	F56A12.4, mir-241	128.294	66.8674	8.55345	9.92894	3.39333	0.608398	5.57749	2.44018e-08	4.35698e-07
MIMAT0022312	miRNA	miR-356b-3p	1965.46	1732.28	154.818	196.924	3.39321	0.21426	15.8369	1.73256e-56	1.88849e-54
MIMAT0000024	miRNA	miR-53-5p	3499.85	5393.27	505.509	342.962	3.39034	0.272024	12.4634	1.182e-35	7.66894e-34
MIMAT0000036	miRNA	miR-64-5p	411679	375187	45347.4	30202.2	3.38062	0.217205	15.5642	1.27504e-54	1.35722e-52
WBGene00023455	pre-miRNA	F25G6.11, mir-358	59.015	62.6882	7.27044	4.55077	3.36624	0.702225	4.79368	1.63753e-06	2.32652e-05
MIMAT0000303	miRNA	miR-247-3p	159.084	89.8531	15.3962	8.68782	3.36592	0.575628	5.84738	4.99379e-09	9.67858e-08
MIMAT0000053	miRNA	miR-80-3p	1.63703e+06	2.2104e+06	186278	188688	3.35907	0.187235	17.9404	5.70197e-72	8.35369e-70
WBGene00168934	piRNA	21ur-8233, C09B9.53	15.3952	2.08961	0.855345	0.827412	3.35732	1.84894	1.8158	0.0694005	0.27951
WBGene00047223	piRNA	21ur-230, Y57G11C.186	15.3952	10.448	1.28302	1.24112	3.35036	1.42572	2.34994	0.0187763	0.108447
WBGene00049121	piRNA	21ur-303, Y105C5A.362	0	8.35843	0	0.827412	3.35001	3.08804	1.08483	0.277995	0.61339
WBGene00171882	piRNA	21ur-8481, F26D12.75	0	8.35843	0	0.827412	3.35001	3.08804	1.08483	0.277995	0.61339
WBGene00002204	ALG target 22G	kin-21, W08D2.8	0	12.5376	0	1.24112	3.34818	2.70175	1.23926	0.215248	0.544732
WBGene00170751	piRNA	21ur-14219, M199.106	0	12.5376	0	1.24112	3.34818	2.70175	1.23926	0.215248	0.544732
WBGene00046780	piRNA	21ur-5224, M199.22	2.56587	14.6272	1.71069	0	3.34787	2.12038	1.5789	0.114358	0.385854
WBGene00171245	piRNA	21ur-5907, Y57G11C.895	12.8294	16.7169	0.427673	2.48224	3.34262	1.44835	2.30788	0.0210059	0.118124
MIMAT0000049	miRNA	miR-77-3p	461605	276436	35541.3	37231.9	3.34221	0.242264	13.7958	2.70288e-43	2.06892e-41
WBGene00003442	ALG target 22G	C34F11.6, msp-49	0	4.17921	0	0.413706	3.34118	4.007	0.833836	0.404373	NA
WBGene00005221	WAGO Class 22G	srg-64, ZK678.6	0	4.17921	0	0.413706	3.34118	4.007	0.833836	0.404373	NA
WBGene00016415	ALG target 22G	ampd-1, C34F11.3	0	4.17921	0	0.413706	3.34118	4.007	0.833836	0.404373	NA
WBGene00020372	ALG target 22G	T09A12.1	0	4.17921	0	0.413706	3.34118	4.007	0.833836	0.404373	NA
WBGene00165542	piRNA	21ur-7094, Y4C6B.32	0	4.17921	0	0.413706	3.34118	4.007	0.833836	0.404373	NA
WBGene00165964	piRNA	21ur-10048, Y73B6BL.104	0	4.17921	0	0.413706	3.34118	4.007	0.833836	0.404373	NA
WBGene00166466	piRNA	21ur-7665, Y57G11B.123	0	4.17921	0	0.413706	3.34118	4.007	0.833836	0.404373	NA
WBGene00166643	piRNA	21ur-8692, Y73F8A.613	0	4.17921	0	0.413706	3.34118	4.007	0.833836	0.404373	NA
WBGene00168430	piRNA	21ur-14144, Y116A8C.294	0	4.17921	0	0.413706	3.34118	4.007	0.833836	0.404373	NA
WBGene00169632	piRNA	21ur-12061, Y105C5A.864	0	4.17921	0	0.413706	3.34118	4.007	0.833836	0.404373	NA
WBGene00171094	piRNA	21ur-6502, Y73F8A.890	0	4.17921	0	0.413706	3.34118	4.007	0.833836	0.404373	NA
WBGene00171374	piRNA	21ur-12547, T06A10.83	0	4.17921	0	0.413706	3.34118	4.007	0.833836	0.404373	NA
WBGene00171411	piRNA	21ur-6393, F35D6.15	0	4.17921	0	0.413706	3.34118	4.007	0.833836	0.404373	NA
WBGene00219254	pre-miRNA	F42G8.17, mir-4920	0	4.17921	0	0.413706	3.34118	4.007	0.833836	0.404373	NA
WBGene00049758	piRNA	21ur-3751, Y51H4A.322	0	12.5376	0.427673	0.827412	3.33997	2.35084	1.42076	0.155386	0.456477
WBGene00047297	piRNA	21ur-3462, Y116A8A.34	0	8.35843	0.427673	0.413706	3.33666	2.71448	1.22921	0.218993	0.548692
WBGene00171767	piRNA	21ur-14257, Y73B6A.11	0	8.35843	0.427673	0.413706	3.33666	2.71448	1.22921	0.218993	0.548692
WBGene00174631	piRNA	21ur-8095, Y73F8A.1131	0	8.35843	0.427673	0.413706	3.33666	2.71448	1.22921	0.218993	0.548692
MIMAT0000699	miRNA	miR-357-3p	638.902	478.52	61.1572	49.6447	3.33237	0.296889	11.2243	3.09889e-29	1.64289e-27
WBGene00165456	piRNA	21ur-8258, Y37A1B.155	0	12.5376	0.855345	0.413706	3.32776	2.35149	1.41517	0.157018	0.459429
WBGene00003308	pre-miRNA	K01F9.3, mir-80	5121.48	6178.97	567.094	561.399	3.32431	0.173493	19.1611	7.81817e-82	1.40161e-79
WBGene00009782	ALG target 22G	F46C5.7	0	4.17921	0.427673	0	3.32005	4.00425	0.829133	0.407029	NA
WBGene00010300	ALG target 22G	F59A1.15	0	4.17921	0.427673	0	3.32005	4.00425	0.829133	0.407029	NA
WBGene00010967	ALG target 22G	MTCE.35, nduo-5	0	4.17921	0.427673	0	3.32005	4.00425	0.829133	0.407029	NA
WBGene00014127	ALG target 22G	ZK892.3	0	4.17921	0.427673	0	3.32005	4.00425	0.829133	0.407029	NA
WBGene00015344	ALG target 22G	C02E11.1, nra-4	0	4.17921	0.427673	0	3.32005	4.00425	0.829133	0.407029	NA
WBGene00016612	ALG Class 26G	C43G2.3	0	4.17921	0.427673	0	3.32005	4.00425	0.829133	0.407029	NA
WBGene00016730	ALG Class 26G	C46H11.6	0	4.17921	0.427673	0	3.32005	4.00425	0.829133	0.407029	NA
WBGene00021998	ALG Class 26G	Y59E9AR.2	0	4.17921	0.427673	0	3.32005	4.00425	0.829133	0.407029	NA
WBGene00022003	ALG Class 26G	Y59E9AR.8	0	4.17921	0.427673	0	3.32005	4.00425	0.829133	0.407029	NA
WBGene00046954	piRNA	21ur-4524, Y57G11B.35	0	4.17921	0.427673	0	3.32005	4.00425	0.829133	0.407029	NA
WBGene00048440	piRNA	21ur-2334, F13G11.35	0	4.17921	0.427673	0	3.32005	4.00425	0.829133	0.407029	NA
WBGene00050216	piRNA	21ur-5376, F52B11.37	0	4.17921	0.427673	0	3.32005	4.00425	0.829133	0.407029	NA
WBGene00168327	piRNA	21ur-12993, Y73F8A.712	0	4.17921	0.427673	0	3.32005	4.00425	0.829133	0.407029	NA
WBGene00171134	piRNA	21ur-8542, Y105C5A.985	0	4.17921	0.427673	0	3.32005	4.00425	0.829133	0.407029	NA
WBGene00171946	piRNA	21ur-7131, C55C3.55	0	4.17921	0.427673	0	3.32005	4.00425	0.829133	0.407029	NA
WBGene00172168	piRNA	21ur-10876, Y105C5B.1175	0	4.17921	0.427673	0	3.32005	4.00425	0.829133	0.407029	NA
WBGene00173249	piRNA	21ur-15611, H04M03.70	0	4.17921	0.427673	0	3.32005	4.00425	0.829133	0.407029	NA
WBGene00173381	piRNA	21ur-11376, T23G4.113	0	4.17921	0.427673	0	3.32005	4.00425	0.829133	0.407029	NA
[truncated: 24,182 more rows]
