# Supplementary material for: A low-abundance class of Dicer-dependent siRNAs produced from a variety of features in C. elegans
Source: HighWire-hosted journal article supplement (doi:10.1101/gr.279083.124), 2024-12-01
Supplement: Supplemental_Table_S9.xlsx [file Supplemental_Table_S9.xlsx]

## Sheet: Table S9
Supplemental Table S9. Geometric mean-normalized 23H-RNA sRNA-seq read counts and statistical analysis for Argonaute co-IPs (libraries from Seroussi et al).
Feature ID	Classifier	Feature Name	GFP::RDE-1 IP rep 1	GFP::RDE-1 IP rep 2	GFP::RDE-1 input rep 1	GFP::RDE-1 input rep 2	log2 fold change	adjusted p-value		GFP::ALG-1 IP rep 1	GFP::ALG-1 IP rep 2	GFP::ALG-1 input rep 1	GFP::ALG-1 input rep 1	log2 fold change	adjusted p-value		GFP::ALG-2 IP rep 1	GFP::ALG-2 IP rep 2	GFP::ALG-2 input rep 1	GFP::ALG-2 input rep 2	log2 fold change	adjusted p-value		GFP::ALG-4 IP rep 1	GFP::ALG-4 IP rep 2	GFP::ALG-4 input rep 1	GFP::ALG-4 input rep 2	log2 fold change	adjusted p-value		GFP::ALG-5 IP rep 1	GFP::ALG-5 IP rep 2	GFP::ALG-5 input rep 1	GFP::ALG-5 input rep 2	log2 fold change	adjusted p-value		GFP::ERGO-1 IP rep 1	GFP::ERGO-1 IP rep 2	GFP::ERGO-1 input rep 1	GFP::ERGO-1 input rep 2	log2 fold change	adjusted p-value
TTTGCCGATGTTTCTGAGATGTC	23H-RNA	F43E2.6	261512	241579	238.901	137.564	10.3894	0		1336.14	2042.1	145.061	161.929	3.46312	2.50425e-24		1378.15	1013.42	205.4	174.425	2.65786	2.78571e-19		213.12	158.073	727.09	656.247	-1.89606	0.0005389		270.86	100.409	647.919	466.986	-1.58405	0.0645804		157.149	279.432	226.867	430.528	-0.592939	0.490449
TGTATTAAACGGTAAGGGCCGGC	23H-RNA	mir-5592	153465	104326	115.597	64.1041	10.4953	0		476.453	878.88	48.1899	43.1995	3.8965	2.22941e-21		1136.72	646.723	69.3076	44.8845	3.9675	2.14378e-16		139.999	89.6159	172.642	171.419	-0.579976	0.445884		181.952	104.652	215.416	176.114	-0.445297	0.323321		148.295	161.684	113.434	176.58	0.0984894	0.931085
TTTGCCGATGTTTCTGAGATGT	23H-RNA	F43E2.6	50265.8	52505.9	28.106	19.058	11.1127	0		103.577	137.864	58.1885	63.6986	0.999758	0.0455263		246.457	186.683	89.0462	76.7014	1.3978	5.80944e-05		18.726	16.1807	231.297	184.661	-3.56839	1.00592e-08		60.9951	31.1127	293.901	199.975	-2.40552	1.17319e-08		4.42673	3.51486	58.5463	99.2126	-4.28337	8.16336e-05
CATCTCAGAAACATCGGCAAATG	23H-RNA	F43E2.6	49205.8	43858.2	29.9193	20.0975	10.8843	0		300.373	672.085	24.8325	18.573	4.49131	4.73845e-19		160.951	66.6725	32.5019	12.1207	2.36235	0.0117564		48.1525	24.8933	110.668	106.677	-1.56113	0.0281687		54.7922	29.6985	85.1646	57.9472	-0.755061	0.215773		59.7608	87.8716	20.3867	41.8695	1.25518	0.161238
AGTGGAGTGGATGACGACGACGA	23H-RNA	Y57G11C.1145_hairpin	29166	22603.3	16.773	6.93017	11.1494	0		0	17.233	5.65494	5.50312	0.740291	0.670891		15.0892	13.3345	10.5371	7.00729	0.701082	0.576751		8.02542	3.734	15.4935	19.1283	-1.53274	0.234555		114.754	53.7401	41.1907	23.8606	1.35684	0.0241651		44.2673	31.6338	20.3867	24.5756	0.768727	0.506732
AGTGGAGTGGATGACGACGACG	23H-RNA	Y57G11C.1145_hairpin, Y57G11C.51	13175.7	11285.2	6.79985	3.81159	11.2194	2.50444e-263		0	0	2.62258	2.61398	-0.591495	NA		15.0892	6.66725	6.97528	3.78772	1.06235	0.46897		6.24199	0	11.0668	6.62133	-1.41937	0.469735		101.314	42.4264	20.5954	10.226	2.18418	0.00103366		17.7069	3.51486	6.79556	12.7429	0.177913	0.944638
TTTGCCGATGTTTCTGAGATGTCT	23H-RNA	F43E2.6	10943.1	9366.09	11.3331	8.66271	10.0093	0		186.438	534.221	16.0633	20.7743	4.30262	1.63551e-13		945.59	560.049	23.0036	22.3476	5.05856	7.16409e-39		27.6431	34.8506	60.8675	54.442	-0.887022	0.293748		82.7052	16.9706	76.8152	60.2196	-0.442138	0.574352		19.9203	22.8466	24.0458	47.3308	-0.733681	0.564698
CATGTATTAAACGGTAAGGGCC	23H-RNA	mir-5592	10769.9	7692.99	6.79985	3.46508	10.8673	1.78409e-220		0	0	3.03236	3.85219	-0.983133	NA		25.1487	6.66725	3.26503	4.1665	2.17894	0.0489866		1.78343	2.48933	9.96014	5.88563	-1.89674	0.314122		3.10145	1.41421	12.2459	19.3157	-2.74206	0.0535648		6.64009	0	5.22735	9.10207	-1.00293	0.740022
TTTGCCGATGTTTCTGAGATG	23H-RNA	F43E2.6	7773.44	8168.67	5.8932	2.77207	10.909	3.01604e-213		10.3577	17.233	6.06471	4.54008	1.39916	0.256256		20.1189	33.3362	10.3887	5.87097	1.6809	0.0833675		8.02542	6.22333	27.667	25.0139	-1.87394	0.0735961		12.4058	0	26.7183	22.7244	-1.97324	0.457006		2.21336	0	5.75009	11.8327	-2.80421	0.27426
ATGAAGAGGCAGGGTCCGGTTGC	23H-RNA	Y57G11C.1145_hairpin	6709.96	7148.41	3.17326	2.07905	11.4032	9.83685e-155		0	0	0.327822	0.137578	2.88946	NA		0	6.66725	1.18728	0.378772	1.90234	NA		2.67514	0	1.10668	1.47141	0.102847	NA		5.16908	1.41421	2.78316	0	1.13784	NA		2.21336	7.02973	2.09094	2.73062	0.910805	0.789301
TATTAAACGGTAAGGGCCGGCTG	23H-RNA	mir-5592	5513.12	4005.6	5.43988	3.46508	10.1012	2.0985e-173		176.081	198.179	2.78649	3.02672	6.02039	5.01156e-46		789.668	533.38	3.85867	3.03018	7.58092	1.26677e-72		10.7006	12.4467	11.0668	11.0355	0.0628054	0.97123		9.30434	12.7279	11.6893	7.95354	0.135827	0.924368		5.53341	10.5446	4.70462	10.0123	0.123681	0.964118
TGCCGATGTTTCTGAGATGTCTT	23H-RNA	F43E2.6	3834.76	2801.62	2.71994	1.73254	10.5846	7.35841e-109		0	8.61648	2.37671	1.78851	1.16317	NA		0	6.66725	2.67139	3.59834	-0.0991672	NA		0.891713	0	14.3869	6.62133	-4.33541	0.0485237		7.23671	2.82843	11.6893	5.6811	-0.783187	0.6308		1.10668	0	4.70462	3.64083	-2.64815	NA
CATGTATTAAACGGTAAGGGC	23H-RNA	mir-5592	3013.77	2972.22	1.81329	1.73254	10.7256	2.46391e-97		0	0	1.72107	1.51336	0.101993	NA		0	0	2.67139	3.03018	-1.41967	NA		2.67514	2.48933	5.53341	2.94281	-0.693709	0.778145		8.27052	0	8.34947	11.3622	-1.17079	0.491495		6.64009	3.51486	2.61368	7.28166	0.0910951	0.977348
GTATTAAACGGTAAGGGCCGGC	23H-RNA	mir-5592	3006.84	1781.36	45.3323	29.7997	6.01033	1.11645e-120		41.4307	120.631	12.7031	10.8687	2.81697	1.2722e-06		261.546	213.352	14.2474	13.257	4.11752	7.56388e-39		8.02542	3.734	66.4009	63.2705	-3.42161	5.0182e-05		13.4396	5.65685	50.6535	53.4023	-2.40008	0.00107935		117.308	163.441	64.8192	60.9839	1.15294	0.10519
ATTTGCCGATGTTTCTGAGATGT	23H-RNA	F43E2.6	2603.27	2690.08	1.81329	4.50461	9.63732	1.23284e-134		0	0	4.34365	6.32859	-1.61431	NA		15.0892	0	8.31098	7.76483	0.0582043	0.970902		4.45857	1.24467	8.85346	10.2998	-1.69901	0.325453		4.13526	5.65685	25.0484	17.0433	-2.13394	0.0558272		5.53341	7.02973	8.36376	12.7429	-0.751085	0.738165
ATTAAACGGTAAGGGCCGGCTGG	23H-RNA	mir-5592	2182.38	1787.92	0.453323	0.693017	11.7226	4.37333e-41		145.008	146.48	1.31129	0.825468	7.03858	9.07747e-40		15.0892	46.6707	2.8198	0.757545	4.05486	0.000832302		4.45857	2.48933	2.21336	2.20711	0.668261	0.803417		3.10145	2.82843	7.23621	6.81732	-1.24311	NA		9.96014	15.8169	5.22735	2.73062	1.65155	0.350081
TGCCGATGTTTCTGAGATGTCT	23H-RNA	F43E2.6	2036.89	1755.12	3.17326	2.42556	9.43014	1.15311e-107		72.5038	155.097	4.09778	2.33883	5.14061	3.97298e-18		80.4757	60.0052	3.56185	3.03018	4.42407	7.39828e-17		3.56685	1.24467	26.5604	13.9784	-3.00504	0.0217278		65.1304	28.2843	11.6893	13.6346	1.90854	0.010466		0	0	9.40923	14.5633	-5.54012	0.0269096
CGGCCCTTACCGTTTAATACATG	23H-RNA	mir-5592	1948.56	2624.47	6.79985	4.50461	8.6882	4.14494e-149		31.073	172.33	5.32711	8.66742	3.89621	1.0189e-06		45.2676	60.0052	8.01416	4.54527	3.04351	6.8568e-06		2.67514	2.48933	17.7069	34.578	-3.34416	0.00514664		5.16908	4.24264	25.0484	34.0866	-2.62948	0.00795928		1.10668	3.51486	10.9774	10.0123	-2.27301	0.286712
ATTTGCCGATGTTTCTGAGATGTC	23H-RNA	F43E2.6	1941.63	1686.22	0.906647	1.03953	10.8544	3.83788e-57		0	0	1.39324	0.68789	0.731905	NA		0	0	0.593641	0.946931	0.469866	NA		1.78343	0	0	3.67852	-1.01859	NA		0	0	2.78316	2.27244	-3.51215	NA		0	0	2.61368	4.55104	-3.79549	NA
CATCTCAGAAACATCGGCAAAT	23H-RNA	F43E2.6	1825.58	1476.27	1.35997	1.73254	10.0427	3.0182e-74		41.4307	25.8494	2.78649	3.43945	3.42176	9.57768e-06		10.0595	26.669	4.15549	1.70448	2.58642	0.0401244		6.24199	1.24467	7.74677	7.35703	-0.963065	0.621364		17.5749	4.24264	15.0291	5.6811	0.0673911	0.966319		2.21336	8.78716	2.61368	7.28166	0.132136	0.968245
TCCGATTTCTGCCCCCCCAAAATG	23H-RNA	PAL8C	1780.55	2004.44	0	0.346508	13.2258	2.39944e-19		0	8.61648	0.327822	0.550312	3.45617	NA		0	6.66725	0.296821	0.189386	3.58861	NA		1.78343	0	2.21336	3.67852	-1.63975	NA		0	0	1.11326	2.27244	-2.90858	NA		0	0	0	0	NA	NA
TGAAGAGGCAGGGTCCGGTTGC	23H-RNA	Y57G11C.1145_hairpin	1763.23	1869.94	1.35997	0.346508	11.1708	2.27803e-49		41.4307	25.8494	0.409778	0	7.08224	4.33804e-11		65.3865	0	0	0.189386	8.57754	0.00172514		1.78343	2.48933	2.21336	0.735703	0.56953	NA		9.30434	4.24264	2.78316	0	2.11894	NA		4.42673	1.75743	1.56821	0	1.89594	NA
TGTATTAAACGGTAAGGGCCG	23H-RNA	mir-5592	1709.53	1007.14	5.8932	4.1581	8.11158	2.06256e-103		31.073	206.795	2.04889	2.06367	5.87952	5.43209e-13		367.171	366.699	3.71026	1.89386	7.00285	3.36584e-58		3.56685	1.24467	5.53341	11.7713	-1.81538	0.322802		2.06763	2.82843	13.3592	10.226	-2.29631	0.13538		9.96014	0	5.22735	5.46124	-0.0308158	0.993352
TGAAGAGGCAGGGTCCGGTTGCG	23H-RNA	Y57G11C.1145_hairpin	1629.86	1479.55	0	0.346508	12.9467	1.51924e-18		20.7154	8.61648	0.327822	0.275156	5.53662	2.05908e-05		15.0892	40.0035	0.890462	0	5.86403	0.000177595		0.891713	3.734	3.32005	0.735703	0.19953	NA		6.20289	0	1.66989	1.13622	1.16232	NA		6.64009	1.75743	1.04547	2.73062	1.23324	NA
TTAAACGGTAAGGGCCGGCTGG	23H-RNA	mir-5592	1603.88	1233.5	5.43988	5.89064	7.96748	7.644e-126		331.446	1128.76	3.03236	3.85219	7.74009	1.75267e-31		724.282	1040.09	5.19436	2.27263	7.86174	2.32485e-50		16.0508	6.22333	6.64009	10.2998	0.401555	0.807835		24.8116	8.48528	11.6893	11.3622	0.552656	0.636129		6.64009	17.5743	10.4547	25.4858	-0.590271	0.756304
CATGTATTAAACGGTAAGGGCCG	23H-RNA	mir-5592	1186.45	659.399	2.26662	0.693017	9.39076	6.94518e-53		0	0	0.245867	0.412734	2.4066	NA		5.02973	0	0.445231	0	3.61801	NA		0.891713	1.24467	2.21336	1.47141	-0.78774	NA		0	0	1.66989	0	-1.95426	NA		1.10668	0	2.09094	0	-0.709397	NA
TGTATTAAACGGTAAGGGCCGG	23H-RNA	mir-5592	1068.68	912.004	2.71994	2.07905	8.71704	1.15245e-77		20.7154	34.4659	1.96693	2.61398	3.63526	1.75492e-05		145.862	113.343	3.71026	1.70448	5.56409	4.45963e-22		6.24199	3.734	4.42673	5.88563	-0.0417603	0.986321		5.16908	4.24264	13.3592	7.95354	-1.19074	0.412938		3.32005	5.2723	2.61368	2.73062	0.668516	0.849312
ACATCTCAGAAACATCGGCAAAT	23H-RNA	F43E2.6	1047.89	718.45	0	0.346508	12.138	3.37875e-16		31.073	86.1648	3.03236	2.20125	4.50643	6.29916e-12		45.2676	0	3.56185	1.3257	3.24972	0.0873934		6.24199	3.734	7.74677	7.35703	-0.579747	0.756422		7.23671	2.82843	7.79284	0	0.302358	NA		7.74677	12.302	3.65915	2.73062	1.62053	0.42162
ATGTATTAAACGGTAAGGGCC	23H-RNA	mir-5592	1039.23	744.694	0.453323	0.346508	11.1568	6.48123e-25		0	0	0.327822	0.412734	2.23358	NA		15.0892	6.66725	0.593641	0.568159	4.27695	0.00167284		1.78343	0	2.21336	0.735703	-0.6214	NA		0	1.41421	3.89642	1.13622	-2.02101	NA		0	0	2.61368	1.82041	-3.11694	NA
ATTTGCCGATGTTTCTGAGATG	23H-RNA	F43E2.6	1006.32	921.846	4.07991	3.46508	8.01377	9.39102e-95		0	8.61648	0.983467	2.06367	1.64563	NA		0	0	0.742051	1.70448	-0.196318	NA		0.891713	0	5.53341	1.47141	-2.7523	NA		4.13526	4.24264	5.56632	2.27244	0.0499846	NA		2.21336	3.51486	3.13641	4.55104	-0.437716	0.905798
GTCGTCGTCATCCACTCCACCGA	23H-RNA	Y57G11C.1145_hairpin	966.484	524.895	0.453323	0	11.8944	2.0095e-15		0	0	0	0.137578	4.75198	NA		0	0	0.14841	0	3.71683	NA		0	0	0	0	NA	NA		0	1.41421	0	0	2.21349	NA		1.10668	0	0	0	2.36895	NA
ATTAAACGGTAAGGGCCGGCTG	23H-RNA	mir-5592	943.968	780.781	2.71994	0.693017	9.09701	2.11201e-59		51.7884	34.4659	0.573689	0.137578	6.75016	4.4375e-14		45.2676	66.6725	2.07774	0.189386	5.58094	1.91024e-06		1.78343	0	0	3.67852	-1.01859	NA		2.06763	0	2.78316	6.81732	-2.07871	NA		2.21336	3.51486	3.13641	3.64083	-0.261065	NA
AGCCGTGGTCGATGCTGAAAGG	23H-RNA	F55A4.9, rncs-1	843.509	915.285	0	0	13.5557	5.94481e-19		0	0	0	0	NA	NA		0	0	0	0	NA	NA		0	0	1.10668	0	-1.43789	NA		0	0	0	0	NA	NA		0	0	0	0	NA	NA
TGCTTTCCTCATCTCTGATCTTT	23H-RNA	F55A4.9, rncs-1	753.442	872.637	0.453323	0	12.0031	6.34615e-16		0	0	0	0	NA	NA		0	6.66725	1.18728	0.757545	1.58768	NA		2.67514	0	1.10668	2.94281	-0.555566	NA		2.06763	0	2.22653	2.27244	-1.03873	NA		0	0	0	1.82041	-1.79774	NA
TTTTGGGGGGCAGAAATCGGAAA	23H-RNA	PAL8C	732.657	698.766	0.906647	0.693017	9.8321	3.04116e-37		0	34.4659	0.245867	0.412734	5.8608	3.32772e-06		0	6.66725	0	0.378772	4.06074	NA		1.78343	0	1.10668	4.41422	-1.56637	NA		0	0	0.556632	1.13622	-1.90807	NA		1.10668	0	0.522735	0	1.03115	NA
ATGGCTGCGGCGAGGATGATGTG	23H-RNA	Y57G11C.1145_hairpin	704.945	554.42	0	0.693017	10.6582	1.26703e-22		0	0	0.163911	0.275156	2.99197	NA		0	0	0.593641	0.189386	1.43859	NA		0	0	0	0	NA	NA		2.06763	0	1.66989	0	0.262947	NA		0	0	1.04547	2.73062	-2.86571	NA
TATTAAACGGTAAGGGCCGGC	23H-RNA	mir-5592	696.284	610.19	3.62659	3.46508	7.53369	7.22088e-76		165.723	232.645	1.31129	1.2382	7.29201	1.91827e-49		482.854	333.362	1.4841	1.3257	8.18333	7.39107e-59		7.13371	2.48933	6.64009	2.94281	0.0581839	0.982299		10.3382	2.82843	12.2459	11.3622	-0.804115	0.566872		1.10668	3.51486	2.09094	8.19187	-1.19174	0.723346
TGGAGTGGATGACGACGACGATG	23H-RNA	Y57G11C.1145_hairpin	647.787	567.542	0	1.03953	10.0203	2.69528e-29		0	0	0.163911	0.275156	2.99197	NA		5.02973	0	0.445231	0	3.61801	NA		0	0	1.10668	0.735703	-2.24113	NA		1.03382	0	1.11326	1.13622	-0.947254	NA		0	1.75743	0	0	2.70729	NA
ATCTCAGAAACATCGGCAAATG	23H-RNA	F43E2.6	620.074	564.262	1.81329	0.346508	9.23221	7.00111e-40		31.073	17.233	0.819556	0.825468	4.84595	2.86307e-07		5.02973	6.66725	1.03887	0.757545	2.67131	NA		2.67514	3.734	4.42673	2.94281	-0.19916	0.941519		33.0821	15.5563	6.12295	2.27244	2.45586	0.0211863		0	5.2723	2.09094	0.910207	0.713681	NA
AGTGGAGTGGATGACGACGACGG	23H-RNA	Y57G11C.51	594.093	580.665	0.453323	0	11.5394	1.04148e-14		0	0	0.573689	0.412734	1.81262	NA		5.02973	0	2.8198	0.189386	0.896721	NA		0.891713	0	1.10668	0	-0.0248022	NA		3.10145	2.82843	3.89642	2.27244	-0.0824667	NA		1.10668	0	2.09094	0	-0.709397	NA
TTTGGCCAAGCGGACTGGAGCACA	23H-RNA	F55A4.9, rncs-1	526.543	416.635	0	0	12.6679	1.89365e-16		0	0	0.163911	0	4.36457	NA		0	0	0.14841	0	3.71683	NA		0	0	0	0.735703	-1.13933	NA		0	0	0	0	NA	NA		0	0	0	0.910207	-0.728152	NA
GCCCTTACCGTTTAATACATG	23H-RNA	mir-5592	486.706	429.757	2.26662	1.38603	8.01833	2.46591e-48		10.3577	60.3153	0.245867	1.37578	5.56114	2.1843e-06		140.833	106.676	0.742051	0.568159	7.5551	4.49963e-29		1.78343	0	3.32005	2.20711	-1.52757	NA		2.06763	0	1.66989	2.27244	-0.83964	NA		13.2802	31.6338	0.522735	1.82041	4.37965	0.00773287
TGTATTAAACGGTAAGGGCCGGCT	23H-RNA	mir-5592	438.209	324.779	0.906647	0.693017	8.93364	2.35101e-29		10.3577	34.4659	1.80302	1.37578	3.85402	4.60843e-05		70.4163	26.669	1.92933	1.51509	4.84928	2.04995e-10		0.891713	1.24467	3.32005	2.94281	-1.56583	NA		4.13526	1.41421	5.00968	11.3622	-1.48603	NA		0	5.2723	5.22735	4.55104	-1.00399	0.781874
TGCCGATGTTTCTGAGATGTCTTC	23H-RNA	F43E2.6	408.764	321.498	0.453323	0.346508	9.86932	3.70677e-19		0	0	0	0.137578	4.75198	NA		0	0	0	0	NA	NA		0	0	1.10668	0	-1.43789	NA		1.03382	0	1.11326	0	-0.0305466	NA		0	0	0	0	NA	NA
TGATGCGGTTGTTCCAAAGAATC	23H-RNA	F55A4.9, rncs-1	396.64	377.268	0	0.346508	10.9408	3.64214e-13		10.3577	34.4659	0.245867	0.137578	6.84129	1.12625e-08		25.1487	0	0	0	8.69953	0.0141159		1.78343	0	0	2.20711	-0.303	NA		0	0	0	1.13622	-1.23112	NA		1.10668	0	0.522735	0.910207	-0.105136	NA
CCGATGTTTCTGAGATGTCTTC	23H-RNA	F43E2.6	387.979	242.764	0	0.693017	9.67227	5.10537e-18		0	8.61648	0.163911	0	5.60499	NA		0	0	0	0.189386	3.53881	NA		0.891713	0	2.21336	0.735703	-1.51181	NA		1.03382	0	0.556632	0	0.670767	NA		0	1.75743	0	1.82041	-0.133465	NA
CATCTCAGAAACATCGGCAAA	23H-RNA	F43E2.6	377.587	311.656	0	0	12.2147	3.11854e-15		10.3577	8.61648	0.491734	0.275156	4.55966	0.00348018		0	0	1.03887	0.378772	0.58337	NA		0.891713	0	0	1.47141	-0.596265	NA		2.06763	0	2.22653	0	-0.135874	NA		1.10668	0	0	0	2.36895	NA
AGACATCTCAGAAACATCGGCA	23H-RNA	F43E2.6	361.999	285.411	0.453323	0	10.6882	1.58214e-12		0	0	0.245867	0.412734	2.4066	NA		0	0	0.593641	0.378772	1.12907	NA		0.891713	0	1.10668	0.735703	-0.851327	NA		0	0	1.11326	0	-1.38496	NA		0	1.75743	0	0	2.70729	NA
CGATGGCTGCGGCGAGGATGATG	23H-RNA	Y57G11C.1145_hairpin	361.999	360.865	0.453323	0	10.8377	6.36898e-13		0	0	0	0	NA	NA		0	0	0	0	NA	NA		0.891713	0	0	0	1.5999	NA		2.06763	1.41421	1.11326	1.13622	0.643143	NA		0	1.75743	0	0.910207	0.970094	NA
TTGCCGATGTTTCTGAGATGTC	23H-RNA	F43E2.6	356.802	308.376	1.35997	0.346508	8.72478	4.91986e-28		10.3577	68.9318	0.573689	0.68789	6.0524	8.34727e-12		15.0892	0	0.445231	0.568159	4.01692	0.0285654		3.56685	1.24467	4.42673	2.20711	-0.40851	0.885594		1.03382	0	1.66989	2.27244	-1.74066	NA		0	0	0	4.55104	-3.12465	NA
CCAAGCGGACTGGAGCACATTGG	23H-RNA	F55A4.9, rncs-1	355.07	400.232	0.453323	0	10.8959	4.66068e-13		0	0	0.0819556	0.137578	3.99304	NA		0	0	0.593641	0	1.83405	NA		0	0	1.10668	1.47141	-2.73912	NA		0	0	1.11326	0	-1.38496	NA		0	0	0.522735	0	-0.322129	NA
GCCGATGTTTCTGAGATGTCTTC	23H-RNA	F43E2.6	344.678	223.08	0	0	11.9436	1.91695e-14		0	0	0	0	NA	NA		0	0	0.14841	0.378772	2.01996	NA		0	0	0	0	NA	NA		1.03382	0	0.556632	1.13622	-0.50627	NA		2.21336	0	0	0.910207	1.49618	NA
TATTAAACGGTAAGGGCCGGCT	23H-RNA	mir-5592	342.946	334.62	3.62659	3.11858	6.66317	1.91978e-50		207.154	301.577	2.29476	3.02672	6.61215	3.39678e-51		487.884	506.711	3.11662	3.40895	7.25597	1.16988e-98		0.891713	3.734	11.0668	7.35703	-2.05223	0.254722		7.23671	8.48528	18.9255	24.9968	-1.4793	0.147641		2.21336	1.75743	10.4547	14.5633	-2.62912	0.184491
TGGATGATGGCGTGGAAGAAGTT	23H-RNA	Y57G11C.1145_hairpin	339.482	354.304	1.81329	0.346508	8.45284	3.91466e-32		0	0	0.0819556	0.137578	3.99304	NA		0	0	0.14841	0	3.71683	NA		0	0	1.10668	0	-1.43789	NA		0	0	1.11326	0	-1.38496	NA		1.10668	0	0	0	2.36895	NA
ACATCTCAGAAACATCGGCAA	23H-RNA	F43E2.6	337.75	206.677	0	0	11.8846	2.8612e-14		0	0	0.409778	0.275156	2.33781	NA		0	0	0.14841	0.189386	2.65873	NA		0	0	1.10668	0	-1.43789	NA		1.03382	0	1.11326	1.13622	-0.947254	NA		0	0	0	0	NA	NA
GGTGGAGTGGATGACGACGACGA	23H-RNA	Y57G11C.1145_hairpin	336.018	295.253	0	0	12.0856	6.5875e-15		0	0	0.163911	0.137578	3.52423	NA		0	6.66725	0.14841	0	5.20182	NA		1.78343	1.24467	2.21336	0	0.544787	NA		2.06763	1.41421	0	1.13622	1.92234	NA		1.10668	0	0.522735	0.910207	-0.105136	NA
TGCCGATGTTTCTGAGATGTC	23H-RNA	F43E2.6	330.822	249.325	0	0.346508	10.5351	3.92096e-12		10.3577	0	0.245867	0.137578	4.56983	NA		5.02973	0	0	0.378772	3.93787	NA		0	0	1.10668	0	-1.43789	NA		1.03382	0	0	0	1.98461	NA		1.10668	0	0	0	2.36895	NA
AGTGGAGTGGATGACGACGAC	23H-RNA	Y57G11C.1145_hairpin, Y57G11C.51	322.161	396.952	1.35997	0	9.23497	2.03964e-24		10.3577	0	0	0.137578	6.46021	NA		0	0	0.296821	0	2.82578	NA		0	0	2.21336	3.67852	-3.93518	NA		11.372	2.82843	1.11326	0	3.43141	NA		1.10668	1.75743	3.13641	0.910207	-0.554815	NA
ATCTCAGAAACATCGGCAAATGG	23H-RNA	F43E2.6	318.697	262.447	0.906647	0	9.5319	8.37471e-18		0	0	0.163911	0.137578	3.52423	NA		0	0	0.742051	0.189386	1.1879	NA		0	1.24467	0	0.735703	0.44975	NA		3.10145	0	1.11326	1.13622	0.518849	NA		0	0	0	0	NA	NA
TCCGCGCGCCGCTATGTTTAACT	23H-RNA	PALTA3	313.501	219.8	0.906647	0.346508	8.83148	1.10828e-21		0	0	0	0	NA	NA		0	0	0.296821	0.568159	1.30376	NA		0	0	0	0.735703	-1.13933	NA		0	0	0.556632	0	-0.70837	NA		0	0	0	0	NA	NA
TGGATGATGGCGTGGAAGAAGTTG	23H-RNA	Y57G11C.1145_hairpin	311.769	265.728	0.453323	0	10.5205	3.89305e-12		0	0	0.0819556	0.137578	3.99304	NA		0	0	0	0	NA	NA		0	0	0	0	NA	NA		0	0	0	0	NA	NA		2.21336	0	1.04547	0.910207	0.256595	NA
TGCTTTCCTCATCTCTGATCTT	23H-RNA	F55A4.9, rncs-1	301.377	321.498	0	0	12.0578	7.58768e-15		0	0	0	0.275156	3.68651	NA		0	0	0.14841	0.189386	2.65873	NA		0	0	1.10668	0	-1.43789	NA		0	0	0.556632	1.13622	-1.90807	NA		0	0	0	0	NA	NA
AGCCGTGGTCGATGCTGAAAGGT	23H-RNA	F55A4.9, rncs-1	273.664	410.074	0	0	12.1801	4.40198e-15		0	0	0.491734	0.550312	1.73922	NA		0	0	0	1.13632	0.911782	NA		0	0	0	0.735703	-1.13933	NA		0	0	0	0	NA	NA		0	0	0	0.910207	-0.728152	NA
TTAAACGGTAAGGGCCGGCTGGG	23H-RNA	mir-5592	271.932	223.08	0	0	11.7381	5.49025e-14		62.1461	120.631	0.163911	0.275156	8.80767	1.08671e-21		145.862	153.347	0.593641	0.378772	8.22957	1.63045e-30		1.78343	1.24467	1.10668	3.67852	-0.678627	NA		2.06763	0	1.66989	4.54488	-1.46083	NA		3.32005	7.02973	1.04547	1.82041	1.86218	0.526996
AATTGTGAAGACATCTCAGAAAC	23H-RNA	F43E2.6	263.272	262.447	1.35997	2.07905	7.22187	7.91082e-36		82.8614	120.631	0.7376	1.10062	6.85416	7.73844e-30		60.3568	60.0052	1.4841	0.757545	5.71158	6.82007e-17		0.891713	1.24467	4.42673	5.14992	-2.18814	0.382187		1.03382	0	1.66989	4.54488	-2.37176	NA		2.21336	0	2.61368	2.73062	-1.1539	NA
TGGATAAGATGATGAAACTAGTC	23H-RNA	F55A4.9, rncs-1	263.272	364.146	0.453323	0.346508	9.62731	4.55919e-18		0	0	0.163911	0	4.36457	NA		0	0	0	0.189386	3.53881	NA		0	0	1.10668	1.47141	-2.73912	NA		0	0	0	0	NA	NA		0	0	0	0	NA	NA
ATGAAGAGGCAGGGTCCGGTTG	23H-RNA	Y57G11C.1145_hairpin	258.076	298.534	0	0	11.8918	2.11663e-14		0	0	0.0819556	0	5.1312	NA		0	0	0	0	NA	NA		0	0	0	0	NA	NA		3.10145	0	0.556632	0	2.11594	NA		0	0	0	0	NA	NA
ACGTGTCGCTTCGTCATCTGATG	23H-RNA	F55A4.9, rncs-1	256.344	288.692	0	0	11.8627	2.49611e-14		0	8.61648	0.0819556	0.275156	4.83456	NA		0	6.66725	0.14841	0.189386	4.14488	NA		0	0	4.42673	1.47141	-3.90945	NA		0	0	2.22653	1.13622	-2.93608	NA		0	0	0	1.82041	-1.79774	NA
AGACATCTCAGAAACATCGGC	23H-RNA	F43E2.6	256.344	308.376	0	0.693017	9.48704	1.74895e-17		0	0	0.245867	0.275156	2.73931	NA		0	0	0.445231	0.378772	1.36944	NA		0.891713	0	0	0	1.5999	NA		0	0	1.11326	2.27244	-2.90858	NA		0	0	1.04547	0	-1.07199	NA
ATTCTCTCGTAGAACGTGTCGCT	23H-RNA	F55A4.9, rncs-1	256.344	344.462	0	1.73254	8.25896	2.62464e-29		0	8.61648	0.0819556	0.137578	5.48239	NA		0	0	0.296821	0.378772	1.65828	NA		0	0	0	1.47141	-1.95658	NA		1.03382	0	0.556632	0	0.670767	NA		0	0	0	0	NA	NA
CGACGACGATGGCTGCGGCGAGG	23H-RNA	Y57G11C.1145_hairpin	256.344	252.606	0	0	11.7699	4.30003e-14		0	0	0	0	NA	NA		0	0	0	0	NA	NA		0	0	0	0	NA	NA		0	0	0	0	NA	NA		0	0	0	0	NA	NA
TTAAACGGTAAGGGCCGGCTG	23H-RNA	mir-5592	251.147	177.152	4.53323	2.77207	5.92232	2.74509e-34		103.577	292.96	1.96693	1.78851	6.73486	6.83892e-29		663.925	586.718	3.56185	2.46202	7.68035	1.81112e-97		7.13371	7.468	6.64009	5.14992	0.316219	0.86991		11.372	5.65685	8.9061	7.95354	0.029095	0.985894		2.21336	7.02973	4.70462	6.37145	-0.302579	0.926274
ACATCTCAGAAACATCGGCAAA	23H-RNA	F43E2.6	249.415	150.907	0.453323	1.38603	7.7023	8.82573e-24		0	8.61648	0.491734	0.550312	3.17837	NA		5.02973	0	0.593641	0	3.21208	NA		1.78343	0	2.21336	1.47141	-0.954429	NA		27.913	4.24264	1.66989	0	4.0117	0.0164605		1.10668	1.75743	0	1.82041	0.716339	NA
CGGCCCTTACCGTTTAATACAT	23H-RNA	mir-5592	245.951	331.34	8.61314	5.89064	5.32403	2.40577e-43		10.3577	34.4659	3.19627	6.32859	2.30087	0.0370159		30.1784	46.6707	4.00708	4.1665	3.20469	1.08119e-06		0	0	18.8136	23.5425	-6.77512	0.000341175		2.06763	5.65685	13.9158	30.6779	-2.56398	0.0314951		1.10668	3.51486	7.31829	18.2041	-2.54244	0.206681
TTAAACATAGCGGCGCGCGGAAC	23H-RNA	PALTA3	244.219	190.274	0	0.346508	10.1178	3.89548e-11		10.3577	34.4659	0.245867	0	7.28866	3.48948e-08		20.1189	33.3362	0.14841	0.189386	7.29541	1.29476e-07		0	0	1.10668	0	-1.43789	NA		5.16908	1.41421	0.556632	1.13622	2.05901	NA		0	0	0	0	NA	NA
TGGAGTGGATGACGACGACGA	23H-RNA	Y57G11C.1145_hairpin	233.827	180.433	0.906647	0.346508	8.46375	1.35195e-19		0	8.61648	0.245867	0.68789	3.39109	NA		10.0595	6.66725	0.890462	0.568159	3.53098	0.0202565		1.78343	0	0	1.47141	0.264364	NA		25.8454	9.89949	2.78316	1.13622	3.09972	0.0188543		0	0	1.56821	0	-1.64354	NA
ATATTTGGAACAGAAGCAAGAGG	23H-RNA	F19B2.5	230.363	190.274	0	0.346508	10.0687	4.98038e-11		0	0	0	0	NA	NA		0	0	0	0	NA	NA		0	0	0	0.735703	-1.13933	NA		0	0	0.556632	0	-0.70837	NA		0	0	0	0	NA	NA
CGATGCTCGTCGATCCAGTTTGG	23H-RNA	F55A4.9, rncs-1	226.899	328.059	0	0	11.879	2.59725e-14		0	0	0	0	NA	NA		0	0	0	0	NA	NA		0	0	0	0	NA	NA		0	0	0	0	NA	NA		0	0	0.522735	0.910207	-1.47208	NA
ATTGTGAAGACATCTCAGAAAC	23H-RNA	F43E2.6	223.435	190.274	1.35997	0	8.44923	1.22048e-19		72.5038	94.7812	0.901511	0.825468	6.59852	1.35338e-26		135.803	93.3415	1.63251	0.568159	6.66566	4.79548e-23		4.45857	2.48933	3.32005	2.94281	0.171512	0.951888		2.06763	1.41421	1.66989	5.6811	-1.01306	NA		1.10668	0	2.09094	1.82041	-1.56393	NA
TCGTCGTCATCCACTCCACCGA	23H-RNA	Y57G11C.1145_hairpin	223.435	134.504	0	0	11.2825	1.00593e-12		0	0	0.0819556	0	5.1312	NA		0	6.66725	0	0.189386	5.1187	NA		0	0	0	0	NA	NA		2.06763	1.41421	0	1.13622	1.92234	NA		1.10668	0	0	0.910207	0.644821	NA
TAGATCAAACCGTCATGGGACA	23H-RNA	CELE14B	221.703	137.785	0	0.346508	9.85374	1.87039e-10		0	8.61648	0.245867	0.137578	4.55186	NA		5.02973	0	0	0	6.49962	NA		0	0	2.21336	1.47141	-3.2414	NA		1.03382	1.41421	0	0	3.05925	NA		0	0	0	0	NA	NA
ATTGTGAAGACATCTCAGAAACA	23H-RNA	F43E2.6	216.506	157.468	0.906647	0	8.89873	4.22443e-15		31.073	43.0824	0.0819556	0.550312	7.10543	5.07832e-12		20.1189	6.66725	0	0	8.80596	4.23793e-05		0	0	0	0.735703	-1.13933	NA		0	0	1.66989	0	-1.95426	NA		0	0	0.522735	1.82041	-2.17348	NA
GGCCCTTACCGTTTAATACATG	23H-RNA	mir-5592	214.774	203.397	0.453323	0.346508	9.05772	8.64705e-16		0	77.5483	0.901511	0.68789	5.62168	0.0191742		125.743	113.343	1.92933	0.757545	6.43416	1.4339e-26		4.45857	4.97866	2.21336	8.09273	-0.164007	0.945549		5.16908	1.41421	7.23621	9.08975	-1.25186	NA		127.268	289.976	2.09094	6.37145	5.72469	1.56449e-12
TTGCCGATGTTTCTGAGATGTCT	23H-RNA	F43E2.6	214.774	203.397	2.26662	0.693017	7.23696	1.2089e-28		10.3577	68.9318	0.983467	0.963046	5.40813	8.14473e-11		30.1784	26.669	0.890462	0.757545	5.10726	4.5258e-09		0.891713	3.734	4.42673	2.20711	-0.545691	0.847439		2.06763	2.82843	2.22653	2.27244	0.112763	NA		2.21336	1.75743	1.56821	0.910207	0.667503	NA
ATGTATTAAACGGTAAGGGCCGG	23H-RNA	mir-5592	213.042	141.065	0	0	11.264	1.02902e-12		10.3577	0	0	0.275156	5.34384	NA		0	0	0.14841	0	3.71683	NA		0	1.24467	1.10668	0	0.190057	NA		0	0	1.66989	0	-1.95426	NA		0	1.75743	0	0	2.70729	NA
TGATGCGGTTGTTCCAAAGAATCC	23H-RNA	F55A4.9, rncs-1	207.846	164.03	0	0	11.3277	6.36898e-13		0	0	0.163911	0	4.36457	NA		5.02973	0	0.14841	0	5.1049	NA		0	0	0	0	NA	NA		0	0	0	0	NA	NA		0	0	0	0	NA	NA
CTCTTACTGTAGTTTTCGCTAAG	23H-RNA	PALTA4	206.114	209.958	0.906647	0	9.03885	8.73627e-16		0	8.61648	0	0	7.88001	NA		0	6.66725	0.296821	0	4.29005	NA		0	0	0	0.735703	-1.13933	NA		2.06763	0	1.11326	1.13622	-0.0565753	NA		0	0	0	0	NA	NA
CGATGCTCGTCGATCCAGTTTGGC	23H-RNA	F55A4.9, rncs-1	204.382	295.253	0	0	11.727	6.44571e-14		0	0	0.0819556	0	5.1312	NA		0	0	0	0	NA	NA		0	0	0	0	NA	NA		0	0	0	0	NA	NA		0	0	0	0	NA	NA
ATGAAGAGGCAGGGTCCGGTTGCG	23H-RNA	Y57G11C.1145_hairpin	200.918	259.167	0	0	11.612	1.17034e-13		0	0	0	0	NA	NA		0	0	0	0	NA	NA		0	0	1.10668	0	-1.43789	NA		0	0	0	0	NA	NA		0	0	0	0	NA	NA
GATGATGGCGTGGAAGAAGTTGA	23H-RNA	Y57G11C.1145_hairpin	200.918	91.8566	0.453323	1.03953	7.58064	6.47204e-18		0	8.61648	0.245867	0.137578	4.55186	NA		10.0595	0	0.445231	0.568159	3.44712	NA		1.78343	1.24467	0	0	3.19558	NA		3.10145	4.24264	2.78316	0	1.25276	NA		5.53341	3.51486	1.04547	2.73062	1.32062	NA
TTTGGCCAAGCGGACTGGAGCAC	23H-RNA	F55A4.9, rncs-1	199.186	288.692	0	0	11.6924	7.90682e-14		0	0	0	0	NA	NA		0	0	0	0	NA	NA		0	0	0	0	NA	NA		0	0	0.556632	0	-0.70837	NA		0	0	0	0	NA	NA
ATGTATTAAACGGTAAGGGCCG	23H-RNA	mir-5592	195.722	134.504	0	0	11.1622	1.80447e-12		10.3577	0	0.245867	0	5.07638	NA		25.1487	0	0.14841	0	7.31094	0.00664859		0	0	0	0.735703	-1.13933	NA		0	0	0.556632	1.13622	-1.90807	NA		1.10668	0	1.04547	0	0.272075	NA
ACTTCTTCCACGCCATCATCCACA	23H-RNA	Y57G11C.1145_hairpin	192.258	118.101	0	0	11.0768	3.20154e-12		0	0	0	0	NA	NA		0	0	0	0	NA	NA		0	0	0	0	NA	NA		0	0	0	0	NA	NA		0	0	0	0	NA	NA
CAAGAGGAAGAGAAACAAAAGG	23H-RNA	F19B2.5	185.329	183.713	0	0	11.306	6.74517e-13		0	0	0	0	NA	NA		0	6.66725	0	0.189386	5.1187	NA		0	0	0	0	NA	NA		0	0	0.556632	0	-0.70837	NA		0	0	0	0	NA	NA
AGACATCTCAGAAACATCGGCAA	23H-RNA	F43E2.6	183.597	85.2954	0	0.346508	9.44511	2.01107e-09		10.3577	0	0.0819556	0.137578	5.50629	NA		0	0	0.14841	0	3.71683	NA		0	0	0	0.735703	-1.13933	NA		0	0	0.556632	0	-0.70837	NA		0	0	0	0	NA	NA
ATTCGGGAATTAGTTGTCGACA	23H-RNA	T05E12.8	183.597	226.361	0	0.346508	10.0127	6.75785e-11		0	0	0.327822	0	3.38366	NA		10.0595	6.66725	0	0	8.104	0.000584081		0	0	1.10668	0	-1.43789	NA		0	0	1.11326	0	-1.38496	NA		32.0938	3.51486	2.09094	0	3.94517	0.0381135
CAAACTGGATTGACGAGCATCGAG	23H-RNA	F55A4.9, rncs-1	183.597	354.304	0.453323	0	10.3879	1.19463e-11		0	0	0.163911	0	4.36457	NA		0	0	0.14841	0	3.71683	NA		0	0	0	0	NA	NA		0	0	0	0	NA	NA		0	0	0	0	NA	NA
AGTGGAGTGGATGACGACGACGAT	23H-RNA	Y57G11C.1145_hairpin	181.865	160.749	0.453323	0	9.7654	2.40514e-10		0	0	0.0819556	0	5.1312	NA		0	6.66725	0.14841	0.189386	4.14488	NA		0.891713	0	1.10668	0	-0.0248022	NA		3.10145	2.82843	0.556632	1.13622	1.88352	NA		3.32005	0	1.04547	0.910207	0.828885	NA
CATCTCAGAAACATCGGCAAATGG	23H-RNA	F43E2.6	181.865	141.065	0	0	11.1251	2.06637e-12		0	8.61648	0.163911	0.137578	4.93726	NA		0	0	0.296821	0	2.82578	NA		0	0	0	0	NA	NA		0	0	0	0	NA	NA		0	0	0	0	NA	NA
TTAAACGCAGCGGCGCGCGGAAC	23H-RNA	PALTA3	180.133	226.361	0	0	11.4342	3.34926e-13		0	0	0.163911	0	4.36457	NA		10.0595	0	0.14841	0	6.02702	NA		0	0	0	0	NA	NA		0	0	0	0	NA	NA		0	0	0	0	NA	NA
TTTCCTCATCTCTGATCTTTTCC	23H-RNA	F55A4.9, rncs-1	180.133	203.397	0	0.346508	9.9206	1.07291e-10		0	0	0.163911	0	4.36457	NA		0	0	0	0	NA	NA		0	0	0	0	NA	NA		0	0	0	0	NA	NA		0	1.75743	0	0	2.70729	NA
AAACTGGATTGACGAGCATCGAG	23H-RNA	F55A4.9, rncs-1	178.401	265.728	0	0	11.5555	1.82742e-13		0	0	0	0	NA	NA		0	0	0.14841	0.189386	2.65873	NA		0	0	0	0	NA	NA		0	0	0	0	NA	NA		0	0	0	0.910207	-0.728152	NA
AACTTCTTCCACGCCATCATCCA	23H-RNA	Y57G11C.1145_hairpin	178.401	104.979	0	0.346508	9.51391	1.15922e-09		0	0	0	0.275156	3.68651	NA		15.0892	0	0.296821	0	5.66163	NA		0	0	0	1.47141	-1.95658	NA		3.10145	0	1.66989	0	0.825371	NA		2.21336	1.75743	0	0.910207	2.34929	NA
GAAGGCGCGCTCGAAGAGCCGAGA	23H-RNA	ChrIII_hairpin1	173.205	141.065	0	0	11.0838	2.57468e-12		0	0	0	0	NA	NA		0	0	0	0	NA	NA		0	0	0	0	NA	NA		0	0	0	0	NA	NA		0	0	0	0	NA	NA
TCTCGTAGAACGTGTCGCTTCG	23H-RNA	F55A4.9, rncs-1	171.473	170.591	0.453323	0	9.75728	2.46843e-10		0	0	0	0	NA	NA		5.02973	0	0.296821	0	4.1862	NA		0	0	0	0	NA	NA		0	0	0	0	NA	NA		0	0	0	0	NA	NA
TTTTGGGGGGCAGAAATCGGAA	23H-RNA	PAL8C	164.545	183.713	0	0	11.2164	1.14508e-12		0	0	0.0819556	0	5.1312	NA		0	0	0.445231	0	2.24622	NA		0.891713	0	0	0.735703	0.236666	NA		0	0	0	0	NA	NA		0	0	0	0	NA	NA
TTTCTGAGATGTCTTCACAATTC	23H-RNA	F43E2.6	162.813	101.698	0.453323	0.346508	8.41528	5.25887e-13		0	0	0	0	NA	NA		0	0	0	0	NA	NA		0	0	1.10668	0	-1.43789	NA		0	0	0	0	NA	NA		0	0	0	0	NA	NA
CCGATGTTTCTGAGATGTCTTCA	23H-RNA	F43E2.6	157.617	104.979	0.453323	0.346508	8.40245	5.31099e-13		0	8.61648	0.163911	0.137578	4.93726	NA		0	0	0.296821	0	2.82578	NA		0	0	0	0	NA	NA		1.03382	0	0	0	1.98461	NA		0	0	0	0.910207	-0.728152	NA
CTTGGACTTTTTCGCTGGTTTGG	23H-RNA	F55A4.9, rncs-1	155.885	114.821	0	0	10.8732	9.24734e-12		0	0	0.0819556	0	5.1312	NA		0	0	0	0	NA	NA		0	0	0	0	NA	NA		1.03382	0	0	0	1.98461	NA		0	0	0	0.910207	-0.728152	NA
TCGTCGTCGTCATCCACTCCACC	23H-RNA	Y57G11C.1145_hairpin	154.153	127.943	0	0	10.9272	6.37474e-12		0	0	0	0	NA	NA		0	0	0	0.189386	3.53881	NA		0	0	0	0	NA	NA		0	0	0	1.13622	-1.23112	NA		0	0	0	0	NA	NA
CCAAACTGGATTGACGAGCATCG	23H-RNA	F55A4.9, rncs-1	150.688	180.433	0.453323	0	9.70101	3.42768e-10		0	0	0.0819556	0	5.1312	NA		0	0	0	0.189386	3.53881	NA		0	0	0	0	NA	NA		0	0	1.11326	0	-1.38496	NA		0	0	0	0	NA	NA
AAGACATCTCAGAAACATCGGCA	23H-RNA	F43E2.6	148.956	45.9283	0	0.346508	8.99179	2.94109e-08		0	8.61648	0.245867	0.275156	4.18036	NA		5.02973	0	0.14841	0.189386	4.07997	NA		1.78343	0	0	0.735703	1.10031	NA		2.06763	1.41421	0.556632	0	2.2481	NA		0	0	0.522735	0	-0.322129	NA
GGTGGAGTGGATGACGACGACG	23H-RNA	Y57G11C.1145_hairpin	145.492	141.065	0.906647	0.346508	7.92027	1.3637e-16		0	0	0.245867	0.412734	2.4066	NA		0	0	1.03887	0.568159	0.403923	NA		7.13371	1.24467	1.10668	2.20711	1.33733	0.609861		9.30434	4.24264	3.33979	0	1.87239	NA		3.32005	3.51486	1.56821	0.910207	1.43337	NA
TATTAGACTCCACATATCATTTC	23H-RNA	Y37E11B.2	145.492	88.576	0	0	10.6714	3.31689e-11		0	0	0.245867	0	3.792	NA		25.1487	26.669	0.296821	0	7.30248	2.05425e-07		0	0	0	0	NA	NA		0	0	0.556632	0	-0.70837	NA		0	0	0	0	NA	NA
CTGTTCTGCTCTCTCTTTCAGC	23H-RNA	F55A4.9, rncs-1	143.76	167.31	0	0	11.0514	2.99503e-12		0	0	0.245867	0	3.792	NA		0	0	0.14841	0	3.71683	NA		0	0	0	0	NA	NA		0	0	0.556632	0	-0.70837	NA		0	0	0.522735	0	-0.322129	NA
TATCTCGATACCATGTCTCACCC	23H-RNA	Y37E11B.2	143.76	108.26	0	0	10.7692	1.6474e-11		0	0	0.0819556	0.137578	3.99304	NA		0	0	0.14841	0	3.71683	NA		0	0	0	0.735703	-1.13933	NA		1.03382	0	0.556632	0	0.670767	NA		0	0	0	0	NA	NA
CGATGCTCGTCGATCCAGTTT	23H-RNA	F55A4.9, rncs-1	138.564	147.627	0.453323	0	9.49605	9.78129e-10		0	0	0	0	NA	NA		0	0	0	0	NA	NA		0	0	0	0	NA	NA		0	0	0	0	NA	NA		0	0	0	0	NA	NA
ACATCTCAGAAACATCGGCAAATG	23H-RNA	F43E2.6	136.832	154.188	0	0	10.9568	5.17384e-12		0	0	0.0819556	0	5.1312	NA		0	0	0.14841	0	3.71683	NA		0	0	1.10668	0	-1.43789	NA		0	0	0.556632	1.13622	-1.90807	NA		0	0	0	0	NA	NA
TCCGATTTCTGCCCCCCCAAAAT	23H-RNA	PAL8C	135.1	72.173	0	0	10.5009	9.80086e-11		0	0	0	0	NA	NA		0	0	0	0.189386	3.53881	NA		0	0	0	0	NA	NA		0	0	0	0	NA	NA		0	0	0	0	NA	NA
TTCTCTCGTAGAACGTGTCGCTT	23H-RNA	F55A4.9, rncs-1	131.636	226.361	0.453323	0.693017	8.22699	8.48896e-18		0	0	0.163911	0	4.36457	NA		10.0595	0	0.14841	0	6.02702	NA		0.891713	1.24467	1.10668	0	1.09444	NA		0	0	0.556632	0	-0.70837	NA		0	0	0	1.82041	-1.79774	NA
CATCATCCTCGCCGCAGCCATCG	23H-RNA	Y57G11C.1145_hairpin	129.904	101.698	0	0	10.6457	3.28973e-11		0	0	0	0	NA	NA		0	0	0	0	NA	NA		0	0	0	0	NA	NA		1.03382	0	0	0	1.98461	NA		0	0	0	0.910207	-0.728152	NA
TTTTGGGGGGCAGAAATCGGA	23H-RNA	PAL8C	129.904	104.979	0	0	10.6645	2.92008e-11		0	0	0.163911	0	4.36457	NA		0	0	0	0.189386	3.53881	NA		0	0	0	0.735703	-1.13933	NA		0	0	1.11326	1.13622	-2.33766	NA		0	0	0	0	NA	NA
CGTGTCGCTTCGTCATCTGATGC	23H-RNA	F55A4.9, rncs-1	128.172	144.346	0	0.346508	9.42799	1.45534e-09		0	0	0	0.137578	4.75198	NA		0	0	0.14841	0	3.71683	NA		0	0	0	0	NA	NA		0	0	0	0	NA	NA		0	0	0	0	NA	NA
AACTTCTTCCACGCCATCATCC	23H-RNA	Y57G11C.1145_hairpin	124.708	157.468	0	0	10.9066	7.17811e-12		0	8.61648	0.245867	0	5.05636	NA		0	0	0.14841	0	3.71683	NA		0	1.24467	1.10668	0	0.190057	NA		1.03382	0	0	0	1.98461	NA		0	1.75743	0	0	2.70729	NA
TGCTTTCCTCATCTCTGATCTTTT	23H-RNA	F55A4.9, rncs-1	124.708	101.698	0.453323	0.346508	8.17975	3.01875e-12		0	0	0.163911	0	4.36457	NA		0	0	0.14841	0	3.71683	NA		0	0	2.21336	0	-2.481	NA		1.03382	0	0	0	1.98461	NA		0	0	0	0.910207	-0.728152	NA
AAGACATCTCAGAAACATCGGC	23H-RNA	F43E2.6	121.244	75.4536	0	0.693017	8.00427	2.60157e-11		0	17.233	0.0819556	0.137578	6.47042	0.000617795		5.02973	6.66725	0.296821	0.189386	4.54462	NA		0	1.24467	1.10668	0	0.190057	NA		3.10145	0	1.11326	2.27244	-0.0296928	NA		0	0	0	0	NA	NA
ATCGTCGTCGTCATCCACTCCAC	23H-RNA	Y57G11C.1145_hairpin	119.512	134.504	0	0	10.7605	1.60354e-11		0	0	0.245867	0	3.792	NA		0	0	0	0	NA	NA		0	0	0	0	NA	NA		1.03382	0	0	0	1.98461	NA		0	0	0.522735	0.910207	-1.47208	NA
TGGAGTGGATGACGACGACGAT	23H-RNA	Y57G11C.1145_hairpin	112.583	78.7342	1.81329	1.73254	5.77548	6.04844e-17		41.4307	86.1648	1.14738	0.412734	6.2902	6.88694e-17		10.0595	13.3345	1.33569	1.51509	3.02007	0.0146559		2.67514	3.734	6.64009	5.88563	-0.976998	0.630218		27.913	11.3137	7.79284	4.54488	1.64456	0.140661		2.21336	3.51486	5.22735	1.82041	-0.348629	NA
TTGCTTTCCTCATCTCTGATCTT	23H-RNA	F55A4.9, rncs-1	110.851	114.821	0	0	10.5941	4.13544e-11		0	0	0	0	NA	NA		0	0	0.296821	0	2.82578	NA		0	0	0	0	NA	NA		0	0	0	0	NA	NA		0	0	0	0	NA	NA
AGACGCGCGCACTCCCAACTCG	23H-RNA	TC5A	109.119	98.4177	0	0.693017	8.06283	1.07496e-11		0	0	0.0819556	0.550312	2.47596	NA		0	0	0.445231	0	2.24622	NA		0	0	0	0	NA	NA		12.4058	2.82843	1.11326	1.13622	2.78633	NA		1.10668	0	0.522735	0	1.03115	NA
TGAAGACATCTCAGAAACATCGG	23H-RNA	F43E2.6	109.119	98.4177	0	0	10.4805	8.09482e-11		0	0	0.163911	0	4.36457	NA		0	0	0.445231	0.378772	1.36944	NA		0	0	1.10668	0.735703	-2.24113	NA		2.06763	0	0.556632	0	1.53979	NA		0	0	0	0	NA	NA
TATTAAACGGTAAGGGCCGGCTGG	23H-RNA	mir-5592	105.655	104.979	0	0	10.4968	7.29336e-11		41.4307	17.233	0.327822	0.412734	6.29708	2.16518e-10		35.2081	33.3362	0.445231	0.378772	6.37053	4.21616e-11		1.78343	1.24467	1.10668	0	1.63286	NA		1.03382	0	0.556632	0	0.670767	NA		0	3.51486	0.522735	0	2.38956	NA
ATTTGCCGATGTTTCTGAGAT	23H-RNA	F43E2.6	103.923	118.101	3.17326	4.1581	4.89765	5.90771e-19		0	0	2.62258	2.88914	-0.664056	NA		0	0	1.63251	4.54527	-1.53292	NA		2.67514	1.24467	7.74677	2.20711	-1.28467	0.595494		5.16908	1.41421	11.1326	10.226	-1.64619	0.286031		6.64009	10.5446	7.31829	9.10207	0.053081	0.983303
TTCTCTCGTAGAACGTGTCGCT	23H-RNA	F55A4.9, rncs-1	103.923	134.504	0.453323	0.693017	7.65087	6.33276e-15		0	0	0	0	NA	NA		0	0	0	0.378772	2.50616	NA		0	0	0	0	NA	NA		0	0	0	0	NA	NA		0	0	0	0	NA	NA
GTCGTCGTCATCCACTCCACCG	23H-RNA	Y57G11C.1145_hairpin	102.191	68.8924	0	0	10.216	4.08926e-10		0	0	0.0819556	0.137578	3.99304	NA		0	0	0.14841	0.189386	2.65873	NA		0	0	1.10668	0	-1.43789	NA		0	0	0	0	NA	NA		1.10668	0	0	0	2.36895	NA
TTTGGCCAAGCGGACTGGAGC	23H-RNA	F55A4.9, rncs-1	98.7269	154.188	0	0	10.7391	2.09293e-11		0	0	0	0	NA	NA		0	0	0	0	NA	NA		0	0	0	0	NA	NA		0	0	0	1.13622	-1.23112	NA		0	0	0	0	NA	NA
TACAACGTGGAGCTAAGACACCC	23H-RNA	F55C9.3	96.9948	82.0148	0	0	10.2706	2.69849e-10		0	8.61648	0.163911	0	5.60499	NA		0	6.66725	0.14841	0	5.20182	NA		0.891713	0	0	0	1.5999	NA		0	0	0	0	NA	NA		0	0	0	0	NA	NA
TCGCCGCAGCCATCGTCGTCGTC	23H-RNA	Y57G11C.1145_hairpin	95.2628	62.3312	0	0	10.099	8.01041e-10		0	0	0	0	NA	NA		0	0	0	0	NA	NA		0	0	0	0	NA	NA		0	0	0	0	NA	NA		0	0	0	0	NA	NA
AATTCTCTCGTAGAACGTGTCGC	23H-RNA	F55A4.9, rncs-1	93.5307	114.821	0	0	10.47	8.66153e-11		0	0	0	0	NA	NA		5.02973	6.66725	0	0.189386	6.08594	NA		0	0	0	0	NA	NA		0	0	0	1.13622	-1.23112	NA		0	1.75743	0	0.910207	0.970094	NA
CGGCCCTTACCGTTTAATACA	23H-RNA	mir-5592	93.5307	108.26	4.07991	4.85112	4.48046	2.19531e-16		72.5038	292.96	1.72107	3.57703	6.14454	1.54655e-15		281.665	306.693	1.4841	2.46202	7.24737	2.55492e-59		0.891713	2.48933	3.32005	6.62133	-1.61984	0.498654		4.13526	4.24264	11.6893	18.1795	-1.81945	0.16082		0	0	11.5002	16.3837	-5.75936	0.0172694
GTATTAAACGGTAAGGGCCGGCT	23H-RNA	mir-5592	93.5307	59.0506	2.71994	2.07905	5.03088	2.25237e-13		0	0	1.80302	1.92609	-0.100802	NA		35.2081	40.0035	1.18728	0.568159	5.37626	6.8029e-11		0	0	7.74677	6.62133	-5.20956	0.0305707		0	0	7.79284	7.95354	-5.14506	NA		5.53341	5.2723	6.79556	5.46124	-0.185784	0.951641
TTCGAGACTCGTCAGATCTGCA	23H-RNA	K02E2.6	93.5307	121.382	0	0	10.512	6.96198e-11		0	0	0.0819556	0.137578	3.99304	NA		0	0	0.296821	0.189386	2.12861	NA		0	0	0	0	NA	NA		0	0	0	0	NA	NA		0	0	0	0	NA	NA
ATCTCAGAAACATCGGCAAAT	23H-RNA	F43E2.6	91.7987	101.698	0.453323	1.03953	6.94865	9.15785e-15		0	8.61648	0.491734	0	4.13288	NA		5.02973	0	0.445231	0.378772	2.78087	NA		1.78343	1.24467	3.32005	0.735703	-0.365174	NA		9.30434	2.82843	1.66989	2.27244	1.67358	NA		0	0	1.04547	0	-1.07199	NA
TTCGAGACTCGTCAGATCTGC	23H-RNA	K02E2.6	91.7987	91.8566	0	0	10.2987	2.22904e-10		0	0	0	0	NA	NA		0	0	0	0.378772	2.50616	NA		0	0	0	0	NA	NA		0	0	0	0	NA	NA		1.10668	0	0	0	2.36895	NA
TTCTGAGATGTCTTCACAATTCT	23H-RNA	F43E2.6	91.7987	36.0865	0	0.693017	7.40763	7.42642e-09		20.7154	25.8494	0.245867	0.137578	6.85275	4.99165e-09		40.2379	26.669	0.445231	0.189386	6.68813	3.13885e-10		0	0	1.10668	1.47141	-2.73912	NA		1.03382	0	0	2.27244	-0.886941	NA		0	0	0.522735	0.910207	-1.47208	NA
TCATCAGCTCCATCAACACCACC	23H-RNA	C36A4.14	90.0666	127.943	0.453323	0	9.08785	8.54793e-09		0	0	0.163911	0	4.36457	NA		0	0	0	0.189386	3.53881	NA		0	0	0	1.47141	-1.95658	NA		0	0	0	0	NA	NA		1.10668	0	0	0	2.36895	NA
AAGGCGCGCTCGAAGAGCCGAGA	23H-RNA	ChrIII_hairpin1	88.3346	82.0148	0	0	10.1942	4.08476e-10		0	0	0	0	NA	NA		0	0	0	0	NA	NA		0	0	0	0	NA	NA		0	0	0	1.13622	-1.23112	NA		0	0	0	0	NA	NA
ATCGTCGTCGTCATCCACTCCA	23H-RNA	Y57G11C.1145_hairpin	88.3346	91.8566	0.453323	0	8.82827	2.97462e-08		10.3577	17.233	0.245867	0	6.57276	1.39185e-05		0	0	0	0	NA	NA		0	0	0	0	NA	NA		1.03382	1.41421	0.556632	1.13622	0.572361	NA		0	0	0	0	NA	NA
CTCTTACTGTAGTTTTCGCTA	23H-RNA	PALTA4	88.3346	62.3312	0	0	10.0309	1.11024e-09		0	0	0	0	NA	NA		5.02973	0	0	0	6.49962	NA		0	0	0	0	NA	NA		0	0	0	0	NA	NA		0	0	0	0	NA	NA
TATTTTTTGGCACCGCTGTTCTG	23H-RNA	F55A4.9, rncs-1	88.3346	147.627	0	0	10.6361	3.95061e-11		0	0	0	0	NA	NA		0	0	0	0.189386	3.53881	NA		0	0	0	0	NA	NA		1.03382	0	0	0	1.98461	NA		0	0	0	0	NA	NA
ATTCTCTCGTAGAACGTGTCGCTT	23H-RNA	F55A4.9, rncs-1	86.6025	108.26	0.453323	0	8.9317	1.81387e-08		0	0	0	0	NA	NA		0	0	0	0.189386	3.53881	NA		0	0	1.10668	0	-1.43789	NA		0	0	0	0	NA	NA		0	0	0	0	NA	NA
TGAAGAGGCAGGGTCCGGTTG	23H-RNA	Y57G11C.1145_hairpin	84.8705	147.627	0	0	10.6132	4.66003e-11		0	0	0.0819556	0	5.1312	NA		0	0	0.14841	0	3.71683	NA		0	0	0	0	NA	NA		1.03382	1.41421	0	0	3.05925	NA		0	1.75743	0	0	2.70729	NA
TTTTGTTTCTCTTCCTCTTGCT	23H-RNA	F19B2.5	84.8705	78.7342	0.453323	0.346508	7.70413	1.74536e-10		10.3577	8.61648	0.163911	0	6.57272	0.000434308		5.02973	0	0.296821	0.189386	3.52798	NA		0	0	1.10668	0.735703	-2.24113	NA		0	0	1.11326	0	-1.38496	NA		0	0	0	0	NA	NA
CGATGGCTGCGGCGAGGATGATGT	23H-RNA	Y57G11C.1145_hairpin	83.1384	59.0506	0.453323	0	8.50515	1.57563e-07		0	0	0	0.137578	4.75198	NA		0	0	0	0	NA	NA		0	0	0	0	NA	NA		0	0	0	0	NA	NA		0	0	0	0	NA	NA
GTGGAGCTGGACGATGGATTCTTT	23H-RNA	F55A4.9, rncs-1	83.1384	52.4895	0	0	9.88435	2.64139e-09		0	0	0	0	NA	NA		0	0	0	0	NA	NA		0	0	0	0	NA	NA		0	0	0	1.13622	-1.23112	NA		0	0	0	0	NA	NA
TAAAACTGCGTGGCGTGTACTGC	23H-RNA	PALTA3	83.1384	75.4536	0.453323	0	8.65084	7.25158e-08		0	8.61648	0.0819556	0	6.50802	NA		0	0	0	0	NA	NA		0.891713	0	0	0.735703	0.236666	NA		0	0	0.556632	0	-0.70837	NA		0	0	0	0	NA	NA
CCGCGCGCCGCTATGTTTAACT	23H-RNA	PALTA3	81.4064	65.6118	0	0.346508	8.55688	1.24375e-07		10.3577	17.233	0.0819556	0	8.08045	2.2366e-05		30.1784	40.0035	0	0	10.1375	4.49753e-09		0	0	0	0.735703	-1.13933	NA		21.7101	4.24264	1.11326	0	4.26181	0.0243917		0	0	0.522735	0	-0.322129	NA
CAAGAGGAAGAGAAACAAAAGGA	23H-RNA	F19B2.5	79.6743	65.6118	0	0	9.97093	1.45149e-09		0	0	0	0	NA	NA		0	0	0	0	NA	NA		0	0	0	0	NA	NA		0	0	0	0	NA	NA		0	0	0	0	NA	NA
TCATCCTCGCCGCAGCCATCGTC	23H-RNA	Y57G11C.1145_hairpin	79.6743	72.173	0	0	10.0297	1.02203e-09		0	0	0	0.137578	4.75198	NA		0	0	0	0	NA	NA		0	0	0	0	NA	NA		0	0	0	0	NA	NA		0	0	0	0	NA	NA
AGAACGTGTCGCTTCGTCATCTG	23H-RNA	F55A4.9, rncs-1	77.9423	82.0148	0.453323	0	8.65526	7.0409e-08		0	0	0	0	NA	NA		0	0	0	0.189386	3.53881	NA		0.891713	0	1.10668	0	-0.0248022	NA		0	0	0	0	NA	NA		0	0	0	0	NA	NA
TCTCGTAGAACGTGTCGCTTCGT	23H-RNA	F55A4.9, rncs-1	77.9423	95.1371	0	0	10.2026	3.92937e-10		0	0	0	0	NA	NA		0	0	0	0.189386	3.53881	NA		0	0	1.10668	0	-1.43789	NA		0	0	0	0	NA	NA		0	0	0	0	NA	NA
TGAAGACATCTCAGAAACATC	23H-RNA	F43E2.6	77.9423	82.0148	0	0	10.0967	6.93574e-10		0	0	0.0819556	0.137578	3.99304	NA		0	0	0	0	NA	NA		0	0	0	0	NA	NA		0	0	0	0	NA	NA		0	0	0	0	NA	NA
TTTGGCCAAGCGGACTGGAGCA	23H-RNA	F55A4.9, rncs-1	77.9423	78.7342	0	0	10.069	8.136e-10		0	0	0	0	NA	NA		0	0	0	0.568159	1.9166	NA		0	0	0	0	NA	NA		0	0	0	0	NA	NA		0	0	0	0	NA	NA
ACGATGGATTCTTTGGAGCAACC	23H-RNA	F55A4.9, rncs-1	76.2102	111.54	0	0	10.3111	2.2649e-10		0	0	0.0819556	0	5.1312	NA		5.02973	0	0	0.189386	5.01117	NA		0	0	0	0	NA	NA		0	0	0	0	NA	NA		0	0	0	0	NA	NA
CAATAAAAACAATGGACAACTGC	23H-RNA	Y59H11AR.6	76.2102	75.4536	0	0	10.0232	1.04566e-09		10.3577	0	0	0	8.01412	NA		15.0892	13.3345	0	0	8.85481	9.59646e-06		0	0	0	0	NA	NA		0	0	0	0	NA	NA		1.10668	0	0	0	2.36895	NA
TCTTGCTTCTGTTCCAAATATGC	23H-RNA	F19B2.5	76.2102	72.173	0	0	9.994	1.23585e-09		0	0	0.0819556	0	5.1312	NA		0	0	0	0	NA	NA		0	0	1.10668	0	-1.43789	NA		0	0	0	0	NA	NA		0	0	0	0	NA	NA
TTGGACTTTTTCGCTGGTTTGGT	23H-RNA	F55A4.9, rncs-1	76.2102	118.101	0	0	10.3582	1.7974e-10		0	0	0.0819556	0.275156	3.29828	NA		5.02973	0	0	0	6.49962	NA		0.891713	0	0	1.47141	-0.596265	NA		1.03382	0	0	0	1.98461	NA		0	1.75743	0	0	2.70729	NA
AAGAACAAGCCGTGGGCAAGC	23H-RNA	F39E9.7, F55A4.4	74.4782	72.173	0	0	9.97583	1.36184e-09		0	0	0	0	NA	NA		0	0	0	0	NA	NA		0	0	0	0	NA	NA		0	0	0	0	NA	NA		17.7069	0	0	0	6.12974	0.412412
CGACGATGGCTGCGGCGAGGATG	23H-RNA	Y57G11C.1145_hairpin	74.4782	42.6477	0	0	9.67716	8.84395e-09		0	0	0	0	NA	NA		0	0	0	0	NA	NA		0	0	0	0	NA	NA		0	1.41421	0	1.13622	0.418999	NA		0	0	0	0	NA	NA
ATCGTCGTCGTCATCCACTCC	23H-RNA	Y57G11C.1145_hairpin	72.7461	65.6118	0	0	9.89571	2.12609e-09		0	0	0	0.275156	3.68651	NA		0	0	0	0	NA	NA		0	1.24467	1.10668	0.735703	-0.677236	NA		1.03382	1.41421	0	1.13622	1.36263	NA		0	0	0	0	NA	NA
CAAACTGGATTGACGAGCATCG	23H-RNA	F55A4.9, rncs-1	72.7461	98.4177	0	0	10.1812	4.54019e-10		0	0	0.163911	0	4.36457	NA		0	0	0	0	NA	NA		0	0	0	0	NA	NA		0	0	0	0	NA	NA		0	0	0	0	NA	NA
CATGTATTAAACGGTAAGGGCCGG	23H-RNA	mir-5592	71.0141	39.3671	0	0	9.59306	1.42911e-08		0	0	0	0	NA	NA		0	0	0	0	NA	NA		0	0	0	0.735703	-1.13933	NA		0	0	0	0	NA	NA		0	0	0	0	NA	NA
CAATAAAAACAATGGACAACTG	23H-RNA	Y59H11AR.6	69.282	91.8566	0	0.346508	8.66232	7.35883e-08		0	0	0.0819556	0.137578	3.99304	NA		10.0595	0	0.14841	0.189386	5.02459	NA		0	0	2.21336	0	-2.481	NA		1.03382	0	1.11326	0	-0.0305466	NA		25.4537	5.2723	0	0	6.94365	0.00441433
TACGGTTTGATCTACAAAAAATGC	23H-RNA	CELE14B	69.282	49.2089	0	0	9.68435	7.5494e-09		0	0	0.163911	0.275156	2.99197	NA		15.0892	6.66725	0.593641	0	5.15409	0.00719745		0	0	0	0.735703	-1.13933	NA		0	0	0	0	NA	NA		0	0	0	0	NA	NA
TTTTGTTTCTCTTCCTCTTGCTTC	23H-RNA	F19B2.5	69.282	95.1371	0	0	10.1224	6.3408e-10		0	0	0.0819556	0	5.1312	NA		0	0	0	0	NA	NA		0	0	1.10668	0	-1.43789	NA		0	0	0	0	NA	NA		0	0	0	0	NA	NA
CCAAACTGGATTGACGAGCATC	23H-RNA	F55A4.9, rncs-1	67.55	75.4536	0.453323	0	8.48978	1.56939e-07		0	0	0	0	NA	NA		5.02973	0	0	0	6.49962	NA		0	0	0	0	NA	NA		0	0	0	0	NA	NA		0	0	0.522735	0	-0.322129	NA
TCCGATTTCTGCCCCCCCAAA	23H-RNA	PAL8C	67.55	59.0506	0	0	9.76928	4.37136e-09		0	0	0.0819556	0	5.1312	NA		0	0	0	0	NA	NA		0	0	0	0	NA	NA		0	0	0	0	NA	NA		0	0	0	0	NA	NA
AACCGGACCCTGCCTCTTCATC	23H-RNA	Y57G11C.1145_hairpin	65.8179	45.9283	0	0	9.60072	1.20178e-08		0	0	0.163911	0.275156	2.99197	NA		0	6.66725	0	0.378772	4.06074	NA		0	0	1.10668	0.735703	-2.24113	NA		8.27052	0	0	0	4.84727	NA		1.10668	1.75743	0.522735	0.910207	1.00722	NA
CCGATTTCTGCCCCCCCAAAATG	23H-RNA	PAL8C	65.8179	104.979	0	0	10.1704	5.20587e-10		0	0	0	0	NA	NA		0	0	0	0	NA	NA		0	0	0	0	NA	NA		0	0	0	0	NA	NA		0	1.75743	0	0	2.70729	NA
CGTGTCGCTTCGTCATCTGATG	23H-RNA	F55A4.9, rncs-1	65.8179	68.8924	0	0	9.84911	2.71927e-09		0	0	0	0.137578	4.75198	NA		0	0	0.296821	0	2.82578	NA		0	0	0	0	NA	NA		0	0	0	1.13622	-1.23112	NA		0	0	0	0	NA	NA
TTTTTTGGCACCGCTGTTCTGC	23H-RNA	F55A4.9, rncs-1	65.8179	55.7701	0.453323	1.03953	6.29716	9.43633e-11		10.3577	94.7812	0.573689	0.275156	6.93258	4.74928e-12		135.803	86.6742	0.593641	0	8.42753	6.1175e-19		7.13371	0	2.21336	1.47141	1.011	0.732093		3.10145	1.41421	1.11326	1.13622	1.02755	NA		1.10668	1.75743	1.04547	1.82041	-0.00472578	NA
ATTAAACGGTAAGGGCCGGCT	23H-RNA	mir-5592	62.3538	36.0865	0	0	9.42643	3.42289e-08		0	0	0	0	NA	NA		0	13.3345	0	0.189386	6.18728	NA		0	0	0	0	NA	NA		0	0	0	0	NA	NA		0	0	0	0	NA	NA
ATTCGGGAATTAGTTGTCGAC	23H-RNA	T05E12.8	62.3538	114.821	0	0	10.2177	4.46031e-10		0	0	0	0	NA	NA		0	0	0	0.189386	3.53881	NA		0	0	0	0	NA	NA		0	0	0.556632	0	-0.70837	NA		11.0668	0	0	0	5.4808	NA
GATGATGGCGTGGAAGAAGTTG	23H-RNA	Y57G11C.1145_hairpin	62.3538	22.9641	1.35997	1.03953	5.21475	9.49377e-08		0	0	0.655645	0.550312	1.52471	NA		0	0	1.03887	0.568159	0.403923	NA		3.56685	0	1.10668	1.47141	0.509909	NA		9.30434	5.65685	2.78316	1.13622	1.86545	NA		5.53341	5.2723	1.56821	3.64083	1.09044	0.720222
TAAAGTCGATGGACGGCGAGATT	23H-RNA	PALTTAA1	62.3538	55.7701	0	0	9.6681	7.61462e-09		0	0	0	0	NA	NA		0	0	0	0	NA	NA		0	0	0	0	NA	NA		0	0	0	0	NA	NA		0	0	0	0	NA	NA
TAGATCAAACCGTCATGGGAC	23H-RNA	CELE14B	62.3538	26.2447	0	0	9.2864	9.05427e-08		0	0	0	0	NA	NA		0	0	0	0	NA	NA		0	0	0	0	NA	NA		0	0	0	0	NA	NA		0	0	0	0	NA	NA
TGGATGATGGCGTGGAAGAAGT	23H-RNA	Y57G11C.1145_hairpin	62.3538	88.576	0	0	9.99712	1.27974e-09		0	0	0	0.137578	4.75198	NA		0	0	0	0	NA	NA		0	0	0	0	NA	NA		1.03382	0	0	0	1.98461	NA		0	0	0.522735	0	-0.322129	NA
TGTGGATGATGGCGTGGAAGAAG	23H-RNA	Y57G11C.1145_hairpin	62.3538	36.0865	0	0	9.42643	3.42289e-08		0	0	0	0	NA	NA		0	0	0	0	NA	NA		0	0	0	0	NA	NA		0	0	0	0	NA	NA		1.10668	0	0.522735	0	1.03115	NA
CACGGAGTTAAATTTGAATTTTT	23H-RNA	Y69A2AR.16_hairpin	60.6218	72.173	0	0	9.82144	3.19493e-09		0	0	0	0	NA	NA		5.02973	0	0	0	6.49962	NA		0	0	0	0	NA	NA		0	0	0	0	NA	NA		0	0	0	0	NA	NA
AATTCTCTCGTAGAACGTGTCGCT	23H-RNA	F55A4.9, rncs-1	58.8897	88.576	0	0	9.96081	1.58678e-09		0	0	0	0	NA	NA		0	0	0	0	NA	NA		0.891713	0	0	0	1.5999	NA		0	0	0.556632	0	-0.70837	NA		1.10668	0	0.522735	0	1.03115	NA
CCGATTTCTGCCCCCCCAAAATGT	23H-RNA	PAL8C	58.8897	55.7701	0.453323	0.346508	7.1895	1.14325e-08		0	0	0	0	NA	NA		0	0	0	0.189386	3.53881	NA		0	0	0	0	NA	NA		0	0	0.556632	0	-0.70837	NA		0	0	0	0	NA	NA
CGATGTTTCTGAGATGTCTTCAC	23H-RNA	F43E2.6	58.8897	49.2089	0	0	9.5438	1.53146e-08		0	0	0	0	NA	NA		0	0	0	0	NA	NA		0	0	0	0.735703	-1.13933	NA		0	0	0	0	NA	NA		0	0	0	0.910207	-0.728152	NA
TATCTCGATACCATGTCTCACC	23H-RNA	Y37E11B.2	58.8897	45.9283	0.453323	0	8.05929	1.31156e-06		0	8.61648	0.0819556	0	6.50802	NA		0	0	0.14841	0.189386	2.65873	NA		0	0	0	0	NA	NA		0	0	0	0	NA	NA		1.10668	0	0	0	2.36895	NA
TGGCCAAACTGGATTGACGAGC	23H-RNA	F55A4.9, rncs-1	58.8897	59.0506	0	0	9.65965	7.80874e-09		0	0	0	0	NA	NA		0	0	0	0	NA	NA		0	0	0	0	NA	NA		0	0	0	0	NA	NA		0	0	0	0	NA	NA
TAAACATAGCGGCGCGCGGAACC	23H-RNA	PALTA3	57.1577	68.8924	0	0	9.74555	4.91928e-09		0	25.8494	0.0819556	0.412734	5.95157	0.000125679		5.02973	0	0	0	6.49962	NA		0	0	0	0	NA	NA		0	0	0	0	NA	NA		0	0	0	0	NA	NA
TTTTTTCTGTATTCTTATTTTT	23H-RNA	F52G3.8	57.1577	101.698	1.81329	1.38603	5.62236	1.09327e-13		0	8.61648	0.163911	0.550312	3.79633	NA		65.3865	126.678	0.296821	0.568159	7.81547	1.03191e-18		0.891713	0	1.10668	0.735703	-0.851327	NA		24.8116	8.48528	3.89642	5.6811	1.84978	0.13081		3.32005	3.51486	0.522735	5.46124	0.241909	NA
CTCGGCATTCAGAGGCAACTTCC	23H-RNA	Unknown_RE3	55.4256	42.6477	0	0	9.40772	3.30641e-08		0	0	0	0	NA	NA		0	0	0	0	NA	NA		0	0	0	0	NA	NA		0	0	0	0	NA	NA		0	0	0	0	NA	NA
GGAGTGGATGACGACGACGATGG	23H-RNA	Y57G11C.1145_hairpin	55.4256	39.3671	0	0	9.36267	4.34838e-08		0	0	0	0	NA	NA		0	0	0	0.189386	3.53881	NA		0	0	0	0	NA	NA		2.06763	0	0	1.13622	1.13404	NA		0	1.75743	0.522735	0	1.34235	NA
TAGTTTTCGGGGTACGGTATCT	23H-RNA	ChrIII_hairpin2	55.4256	39.3671	0.906647	0	6.90178	1.01953e-07		0	17.233	0.163911	0.137578	5.91562	0.000776447		0	0	0.14841	0.757545	1.23987	NA		0	0	1.10668	4.41422	-3.85311	NA		0	0	0.556632	1.13622	-1.90807	NA		0	0	1.56821	0	-1.64354	NA
TCATCTCTGATCTTTTCCAATT	23H-RNA	F55A4.9, rncs-1	55.4256	131.224	0	0	10.2858	3.92109e-10		0	0	0	0.137578	4.75198	NA		0	0	0.14841	0	3.71683	NA		0	0	0	0.735703	-1.13933	NA		0	0	0	0	NA	NA		0	0	0	0	NA	NA
TCTCTCGTAGAACGTGTCGCTTCG	23H-RNA	F55A4.9, rncs-1	55.4256	98.4177	0.453323	0	8.57232	1.22012e-07		0	0	0	0	NA	NA		0	0	0.14841	0.189386	2.65873	NA		0	0	0	0	NA	NA		0	0	0	0	NA	NA		0	0	0	0	NA	NA
AACAACGAAGCTCCGAAATAACG	23H-RNA	PALTTAA1	53.6936	65.6118	0	0	9.66543	7.64851e-09		0	0	0	0	NA	NA		0	0	0	0	NA	NA		0	0	0	0.735703	-1.13933	NA		2.06763	0	0	0	2.85028	NA		0	0	0	0	NA	NA
GGAGCTGGACGATGGATTCTTTG	23H-RNA	F55A4.9, rncs-1	53.6936	95.1371	0	0	9.9669	1.68636e-09		0	0	0	0	NA	NA		0	0	0	0	NA	NA		0	0	0	0	NA	NA		0	0	0	0	NA	NA		0	0	0	0	NA	NA
GACATCTCAGAAACATCGGCAAA	23H-RNA	F43E2.6	51.9615	22.9641	0.453323	0	7.59698	1.36989e-05		0	0	0	0.137578	4.75198	NA		0	0	0.14841	0.189386	2.65873	NA		0	0	1.10668	0	-1.43789	NA		1.03382	0	1.11326	0	-0.0305466	NA		0	0	0	0	NA	NA
TATTAGACTCCACATATCATTT	23H-RNA	Y37E11B.2	50.2295	49.2089	0.906647	0.346508	6.38373	7.76007e-09		0	0	0.245867	0	3.792	NA		15.0892	26.669	0.445231	0.568159	5.34331	1.03528e-06		1.78343	0	1.10668	0	0.870314	NA		2.06763	0	1.66989	1.13622	-0.39002	NA		8.85346	1.75743	0.522735	0	4.04847	NA
TTGCCGATGTTTCTGAGATGT	23H-RNA	F43E2.6	50.2295	78.7342	0	0.346508	8.33312	3.85653e-07		0	0	0.245867	0.412734	2.4066	NA		10.0595	0	0.14841	0.946931	3.3255	NA		0	0	0	0.735703	-1.13933	NA		1.03382	0	0.556632	1.13622	-0.50627	NA		0	0	0.522735	1.82041	-2.17348	NA
TTGCTTTCCTCATCTCTGATCTTT	23H-RNA	F55A4.9, rncs-1	50.2295	88.576	0	0	9.86623	2.9312e-09		0	8.61648	0.163911	0.137578	4.93726	NA		0	0	0.14841	0	3.71683	NA		0	0	0	0	NA	NA		0	0	0.556632	1.13622	-1.90807	NA		0	0	0	0.910207	-0.728152	NA
TTTCCTCATCTCTGATCTTTTC	23H-RNA	F55A4.9, rncs-1	50.2295	42.6477	0	0	9.32406	5.06023e-08		0	0	0	0	NA	NA		0	0	0	0	NA	NA		0	0	0	0	NA	NA		0	0	0	0	NA	NA		1.10668	0	0	0	2.36895	NA
AATTGTGAAGACATCTCAGAA	23H-RNA	F43E2.6	48.4974	49.2089	0.453323	0	7.94326	2.1412e-06		31.073	8.61648	0.0819556	0	8.52125	2.40407e-06		5.02973	0	0	0	6.49962	NA		0	0	0	0	NA	NA		1.03382	0	0.556632	0	0.670767	NA		0	0	0	0	NA	NA
ATCTACCTGTTGAACTTGACTCC	23H-RNA	TIR54TA1	48.4974	75.4536	0	0	9.70822	6.56005e-09		0	0	0	0	NA	NA		0	0	0	0	NA	NA		0	0	0	0	NA	NA		0	0	0	0	NA	NA		0	0	0	0	NA	NA
ATTGTGAAGACATCTCAGAAA	23H-RNA	F43E2.6	48.4974	42.6477	0	0	9.29503	5.90439e-08		20.7154	43.0824	0.163911	0	8.33979	7.68769e-10		0	13.3345	0.14841	0.189386	5.20006	NA		0	0	0	0	NA	NA		5.16908	1.41421	0	0	4.51058	NA		0	0	0	0	NA	NA
CATCGTCGTCGTCATCCACTCCA	23H-RNA	Y57G11C.1145_hairpin	48.4974	32.8059	0	0	9.14373	1.43398e-07		0	0	0	0.275156	3.68651	NA		0	0	0	0	NA	NA		0	0	0	0	NA	NA		0	0	0	0	NA	NA		0	0	0	0	NA	NA
CGCGCGCCGCTATGTTTAACTCG	23H-RNA	PALTA3	48.4974	36.0865	0	0	9.19605	1.04766e-07		0	0	0	0	NA	NA		0	0	0	0	NA	NA		0	0	0	0	NA	NA		0	0	0	0	NA	NA		0	0	0	0	NA	NA
TGCTTTCCTCATCTCTGATCT	23H-RNA	F55A4.9, rncs-1	48.4974	52.4895	0	0.346508	8.0005	1.74252e-06		0	0	0.0819556	0.137578	3.99304	NA		0	0	0	0	NA	NA		0	0	0	0	NA	NA		0	1.41421	0	0	2.21349	NA		1.10668	0	0	0	2.36895	NA
TTGGCCAAGCGGACTGGAGCACA	23H-RNA	F55A4.9, rncs-1	48.4974	72.173	0	0	9.67163	7.80874e-09		0	0	0	0	NA	NA		0	0	0	0.189386	3.53881	NA		0	0	0	0	NA	NA		0	0	0.556632	0	-0.70837	NA		0	0	0	0	NA	NA
TTTTTTCTGTATTCTTATTTTTC	23H-RNA	F52G3.8	48.4974	32.8059	0.453323	0	7.6982	7.23633e-06		0	8.61648	0.163911	0.275156	4.46975	NA		20.1189	13.3345	0.14841	0.189386	6.67237	9.67512e-06		0	0	0	0	NA	NA		5.16908	2.82843	1.11326	0	2.6335	NA		0	0	0	0	NA	NA
AAGGATCGATTCATAAATTTTGA	23H-RNA	AAGGATCGATTCATAAATTTTGA_Repeat	46.7654	36.0865	0.453323	0	7.71901	6.3165e-06		0	0	0	0	NA	NA		0	0	0	0	NA	NA		0	0	0	0	NA	NA		0	0	0	0	NA	NA		0	0	0	0	NA	NA
ATGCGGTTGTTCCAAAGAATCC	23H-RNA	F55A4.9, rncs-1	46.7654	39.3671	0	0	9.21578	9.09299e-08		0	0	0	0	NA	NA		0	0	0	0	NA	NA		0	0	0	0	NA	NA		0	0	0	0	NA	NA		0	0	0	0	NA	NA
CCAAGCGGACTGGAGCACATTGGA	23H-RNA	F55A4.9, rncs-1	46.7654	78.7342	0	0	9.72251	6.3076e-09		0	0	0	0	NA	NA		0	0	0	0	NA	NA		0	0	0	0	NA	NA		0	0	0	0	NA	NA		0	0	0	0	NA	NA
CGACACGTTCTACGAGGGAATT	23H-RNA	F55A4.9, rncs-1	46.7654	59.0506	0	0	9.49048	2.01267e-08		0	0	0	0	NA	NA		0	0	0	0	NA	NA		0	0	0	0	NA	NA		0	0	0	0	NA	NA		0	0	0	0	NA	NA
CGCGCGCCGCTATGTTTAACT	23H-RNA	PALTA3	46.7654	39.3671	0.906647	0.346508	6.18311	5.79832e-08		41.4307	68.9318	0.245867	0.275156	7.76649	9.92978e-18		40.2379	53.338	0.445231	0.568159	6.5293	3.92471e-14		1.78343	0	2.21336	0	-0.192388	NA		8.27052	0	1.66989	1.13622	1.57005	NA		0	0	0.522735	1.82041	-2.17348	NA
CTTTTGTTTCTCTTCCTCTTGCT	23H-RNA	F19B2.5	46.7654	59.0506	0	0	9.49048	2.01267e-08		0	8.61648	0.163911	0	5.60499	NA		0	0	0	0	NA	NA		1.78343	0	0	0	2.45526	NA		0	0	0	0	NA	NA		0	0	0	0.910207	-0.728152	NA
TCTCTCGATGCTCGTCGATCCAG	23H-RNA	F55A4.9, rncs-1	46.7654	65.6118	0	0	9.57177	1.32474e-08		0	8.61648	0	0	7.88001	NA		5.02973	0	0	0.189386	5.01117	NA		0	1.24467	0	0	1.84356	NA		0	0	0.556632	0	-0.70837	NA		0	0	0	0	NA	NA
AGTGTAGTCAGCTGAAGAGACA	23H-RNA	rft-2, Y47D7A.14_IR, Y47D7A.14_IR_element	45.0333	16.403	0.453323	0.346508	6.33147	1.00124e-05		0	0	0.163911	0	4.36457	NA		0	0	0	0	NA	NA		0	0	0	0	NA	NA		3.10145	0	0	0	3.43459	NA		0	0	0	0.910207	-0.728152	NA
TAGCGAAAACTACAGTAAGAACT	23H-RNA	PALTA4	45.0333	16.403	0	0	8.76428	1.49438e-06		0	0	0.0819556	0	5.1312	NA		0	0	0.296821	0	2.82578	NA		0	0	0	0	NA	NA		0	0	0	0	NA	NA		0	0	0	0	NA	NA
TATCGCACTCTTTGCCCTTCCG	23H-RNA	jmjc-1, T28F2.4	45.0333	42.6477	0	0	9.23509	7.9934e-08		0	8.61648	0	0.275156	5.29461	NA		0	0	0	0.189386	3.53881	NA		0	0	0	0	NA	NA		0	0	0	1.13622	-1.23112	NA		0	0	0.522735	0	-0.322129	NA
AAGTATGATTGATATTGGGAACA	23H-RNA	Y59H11AR.6	43.3013	39.3671	0	0	9.15241	1.24375e-07		0	0	0.0819556	0	5.1312	NA		0	0	0	0	NA	NA		0	0	0	0	NA	NA		0	0	0.556632	0	-0.70837	NA		0	0	0	0	NA	NA
ATGGCTGCGGCGAGGATGATGT	23H-RNA	Y57G11C.1145_hairpin	43.3013	39.3671	0	0	9.15241	1.24375e-07		0	8.61648	0	0.412734	4.6357	NA		0	0	0.14841	0	3.71683	NA		0	1.24467	0	0	1.84356	NA		0	0	0.556632	1.13622	-1.90807	NA		0	0	0	0	NA	NA
CAAGTGCGACATAAAGGGAACA	23H-RNA	T05E12.10	43.3013	49.2089	0	0.346508	7.87165	3.17118e-06		0	0	0	0	NA	NA		0	0	0	0	NA	NA		0	0	0	0	NA	NA		0	0	0.556632	2.27244	-2.63427	NA		0	1.75743	0.522735	0	1.34235	NA
CGACGACGATGGCTGCGGCGAGGA	23H-RNA	Y57G11C.1145_hairpin	43.3013	29.5253	0	0	8.98461	3.33903e-07		0	0	0	0	NA	NA		0	0	0	0	NA	NA		0	0	0	0	NA	NA		0	0	0	0	NA	NA		0	0	0	0	NA	NA
CGTTCTACGAGGGAATTGACT	23H-RNA	F55A4.9, rncs-1	43.3013	22.9641	0	0	8.85992	7.29467e-07		0	0	0	0	NA	NA		0	0	0	0	NA	NA		0	0	0	0	NA	NA		0	0	0	0	NA	NA		0	0	0	0	NA	NA
CTCTCGTAGAACGTGTCGCTTCG	23H-RNA	F55A4.9, rncs-1	43.3013	42.6477	0	0	9.20414	9.38269e-08		0	8.61648	0	0	7.88001	NA		0	0	0	0	NA	NA		0	0	0	0	NA	NA		0	0	0	0	NA	NA		0	0	0	0	NA	NA
TCTCAGAAACATCGGCAAATGG	23H-RNA	F43E2.6	43.3013	42.6477	0.453323	0	7.759	5.01326e-06		0	0	0	0	NA	NA		0	0	0.296821	0	2.82578	NA		0	0	1.10668	0	-1.43789	NA		0	0	0	0	NA	NA		0	0	0	0.910207	-0.728152	NA
AATTGTGAAGACATCTCAGAAA	23H-RNA	F43E2.6	41.5692	42.6477	0	0	9.1725	1.10381e-07		0	0	0	0	NA	NA		20.1189	0	0.14841	0	6.99853	0.0102805		0	0	0	0	NA	NA		1.03382	1.41421	0	0	3.05925	NA		0	0	0	0	NA	NA
CACTTACCAGCACACAGAGACG	23H-RNA	Y57G11C.51	41.5692	29.5253	0	0	8.94788	3.9846e-07		0	0	0	0	NA	NA		0	0	0	0	NA	NA		0	0	0	0	NA	NA		0	0	0.556632	1.13622	-1.90807	NA		24.347	12.302	0	0	7.18716	0.00190643
CATCGTCGTCGTCATCCACTCC	23H-RNA	Y57G11C.1145_hairpin	41.5692	42.6477	0.906647	0	6.70925	3.64453e-07		0	0	0.0819556	0.137578	3.99304	NA		0	0	0.296821	0	2.82578	NA		0	0	0	2.94281	-2.95503	NA		1.03382	0	0	0	1.98461	NA		0	0	0.522735	0	-0.322129	NA
GAGTGGATGACGACGACGATGGC	23H-RNA	Y57G11C.1145_hairpin	41.5692	42.6477	0	0	9.1725	1.10381e-07		10.3577	8.61648	0.0819556	0.137578	6.50237	0.000372094		5.02973	0	0	0	6.49962	NA		0.891713	0	2.21336	0	-1.07895	NA		0	1.41421	0	2.27244	-0.709584	NA		1.10668	0	1.04547	0	0.272075	NA
GTTTGGCCAAGCGGACTGGAGCA	23H-RNA	F55A4.9, rncs-1	41.5692	19.6835	0	0	8.75113	1.36676e-06		0	0	0	0	NA	NA		0	0	0	0	NA	NA		0	0	0	0	NA	NA		0	0	0	0	NA	NA		0	0	0	0	NA	NA
TGATGTGGATGATGGCGTGGAAG	23H-RNA	Y57G11C.1145_hairpin	41.5692	32.8059	0	0	9.00752	2.79139e-07		0	0	0	0	NA	NA		0	0	0	0	NA	NA		0	0	0	0	NA	NA		0	0	0	0	NA	NA		0	0	0	0	NA	NA
TTCCGCGCGCCGCTATGTTTAAC	23H-RNA	PALTA3	41.5692	32.8059	0	0	9.00752	2.79139e-07		0	8.61648	0	0	7.88001	NA		0	0	0	0	NA	NA		0	0	0	0	NA	NA		0	0	0	0	NA	NA		0	0	0	0	NA	NA
TTGCCGATGTTTCTGAGATGTCTT	23H-RNA	F43E2.6	41.5692	26.2447	0	0	8.88548	5.86663e-07		0	8.61648	0.0819556	0	6.50802	NA		0	0	0	0.378772	2.50616	NA		0.891713	1.24467	1.10668	0	1.09444	NA		1.03382	0	1.11326	1.13622	-0.947254	NA		1.10668	0	0	1.82041	-0.420006	NA
CTCTCGATGCTCGTCGATCCAGT	23H-RNA	F55A4.9, rncs-1	39.8372	65.6118	0	0	9.47194	2.44401e-08		0	0	0	0	NA	NA		0	0	0	0	NA	NA		0	0	0	0	NA	NA		0	0	0	0	NA	NA		0	0	0	0	NA	NA
TTTCTGAGATGTCTTCACAATT	23H-RNA	F43E2.6	39.8372	36.0865	0	0.346508	7.60041	1.12829e-05		0	0	0	0	NA	NA		10.0595	0	0	0	7.39502	NA		0.891713	0	0	1.47141	-0.596265	NA		0	1.41421	0.556632	0	0.875181	NA		1.10668	0	0	0	2.36895	NA
ATTCTCTCGTAGAACGTGTCGC	23H-RNA	F55A4.9, rncs-1	38.1051	68.8924	0	0	9.48878	2.34009e-08		0	0	0	0	NA	NA		0	0	0	0	NA	NA		0	0	0	0	NA	NA		0	0	0	0	NA	NA		0	0	0	0	NA	NA
TCGTCGTCGTCATCCACTCCACT	23H-RNA	Y57G11C.1145_hairpin	38.1051	16.403	0	0	8.58665	3.27548e-06		0	0	0	0.137578	4.75198	NA		0	0	0	0	NA	NA		0	0	1.10668	0.735703	-2.24113	NA		0	0	1.11326	1.13622	-2.33766	NA		0	0	0.522735	0.910207	-1.47208	NA
TCTGAGATGTCTTCACAATTCT	23H-RNA	F43E2.6	38.1051	22.9641	0	0.346508	7.3093	4.56484e-05		62.1461	51.6989	0.409778	0	7.83736	6.47304e-17		25.1487	13.3345	0.14841	0	7.88903	2.35615e-05		0.891713	0	2.21336	0.735703	-1.51181	NA		0	0	1.11326	0	-1.38496	NA		0	0	0	0	NA	NA
TTCCGCGCGCCGCTATGTTTAACT	23H-RNA	PALTA3	38.1051	16.403	0	0	8.58665	3.27548e-06		0	0	0	0	NA	NA		0	0	0	0	NA	NA		0	0	0	0	NA	NA		0	0	0	0	NA	NA		0	0	0	0	NA	NA
TTGCCTCTGAATGCCGAGTAGT	23H-RNA	IR1_CE	38.1051	49.2089	0	0.346508	7.78141	4.88753e-06		41.4307	17.233	0.327822	0.550312	6.08683	4.42445e-10		20.1189	0	0.296821	0.568159	4.65206	0.0114972		0	0	2.21336	0	-2.481	NA		1.03382	1.41421	2.22653	1.13622	-0.503437	NA		0	0	0	0	NA	NA
TTTCCTCATCTCTGATCTTTTCCA	23H-RNA	F55A4.9, rncs-1	38.1051	65.6118	0	0	9.44593	2.86601e-08		0	0	0	0	NA	NA		0	0	0.14841	0	3.71683	NA		0	0	0	0	NA	NA		0	0	0	0	NA	NA		0	0	0	0	NA	NA
TTTCGAAACCGTGCGGCAGTTGC	23H-RNA	DNA-8-1	38.1051	16.403	0	0	8.58665	3.27548e-06		0	0	0	0	NA	NA		0	0	0	0	NA	NA		0	0	0	0	NA	NA		0	1.41421	0	1.13622	0.418999	NA		0	0	0	0	NA	NA
AGTGGATGACGACGACGATGGCT	23H-RNA	Y57G11C.1145_hairpin	36.3731	26.2447	0	0	8.76399	1.05068e-06		0	0	0.0819556	0	5.1312	NA		5.02973	0	0.14841	0	5.1049	NA		0	0	1.10668	0.735703	-2.24113	NA		0	0	0.556632	0	-0.70837	NA		0	0	0	0.910207	-0.728152	NA
ATCGACACAAGCGCTACAGTAGT	23H-RNA	CELE1	36.3731	3.28059	0	0	8.15663	6.10829e-05		0	0	0	0	NA	NA		0	0	0	0	NA	NA		0	0	0	0	NA	NA		0	0	0	0	NA	NA		0	0	0	0	NA	NA
CGATGTTTCTGAGATGTCTTCACA	23H-RNA	F43E2.6	36.3731	19.6835	0	0	8.61798	2.47709e-06		0	0	0	0.137578	4.75198	NA		0	0	0	0	NA	NA		0	0	0	0	NA	NA		0	0	0	0	NA	NA		0	0	0	0	NA	NA
TCTCAGAAACATCGGCAAATG	23H-RNA	F43E2.6	36.3731	22.9641	0	0	8.69297	1.57891e-06		0	8.61648	0	0	7.88001	NA		0	0	0	0	NA	NA		0	0	1.10668	0	-1.43789	NA		1.03382	0	0	0	1.98461	NA		0	0	0	0	NA	NA
TTCTGAGATGTCTTCACAATTC	23H-RNA	F43E2.6	36.3731	45.9283	0.453323	0	7.68198	7.19565e-06		0	17.233	0	0	8.79786	0.164902		10.0595	0	0.14841	0.189386	5.02459	NA		0.891713	0	0	1.47141	-0.596265	NA		2.06763	0	1.11326	0	0.822466	NA		0	1.75743	0	0	2.70729	NA
TTTTGTTTCTCTTCCTCTTGCTT	23H-RNA	F19B2.5	36.3731	36.0865	0.453323	0	7.51083	1.54887e-05		0	0	0.0819556	0	5.1312	NA		0	0	0	0	NA	NA		0	0	0	0	NA	NA		0	0	0	0	NA	NA		0	0	0	0	NA	NA
AGCATCGAGAAACTTGGACTTTT	23H-RNA	F55A4.9, rncs-1	34.641	62.3312	0	0	9.34675	4.95328e-08		0	0	0	0	NA	NA		0	0	0	0	NA	NA		0	0	0	0	NA	NA		0	0	0	1.13622	-1.23112	NA		1.10668	0	0	0	2.36895	NA
AGCCGTGGTCGATGCTGAAAG	23H-RNA	F55A4.9, rncs-1	34.641	32.8059	0	0	8.8566	6.02236e-07		0	0	0	0	NA	NA		0	0	0	0	NA	NA		0	0	0	0	NA	NA		0	0	0	0	NA	NA		0	0	0	0	NA	NA
AGTAATATACCGCTACACCAACC	23H-RNA	ChrII_intergenic1	34.641	55.7701	0.453323	0	7.80522	4.27422e-06		0	0	0	0	NA	NA		0	0	0	0	NA	NA		0	0	0	0	NA	NA		0	0	0.556632	0	-0.70837	NA		1.10668	0	0	0	2.36895	NA
CGATGGATTCTTTGGAGCAACCG	23H-RNA	F55A4.9, rncs-1	34.641	75.4536	0	0.346508	8.09145	1.42413e-06		0	0	0	0	NA	NA		0	0	0	0	NA	NA		0	0	0	0	NA	NA		0	0	0	0	NA	NA		0	0	0	0	NA	NA
CTGCGGCGAGGATGATGTGGATG	23H-RNA	Y57G11C.1145_hairpin	34.641	29.5253	0	0	8.79045	8.68728e-07		0	0	0	0	NA	NA		0	0	0	0	NA	NA		0	0	0	0	NA	NA		0	0	0	0	NA	NA		0	0	0	0	NA	NA
TGAAAGAGAGAGCAGAACAGCG	23H-RNA	F55A4.9, rncs-1	34.641	9.84177	0	0	8.30669	1.66816e-05		0	0	0.0819556	0	5.1312	NA		0	0	0	0	NA	NA		0	0	0	0.735703	-1.13933	NA		0	0	0	0	NA	NA		0	0	0	0	NA	NA
TGTTCTGCTCTCTCTTTCAGC	23H-RNA	F55A4.9, rncs-1	34.641	19.6835	0	0	8.57059	3.08108e-06		0	0	0	0.137578	4.75198	NA		0	0	0	0	NA	NA		0	0	0	0	NA	NA		0	0	0	0	NA	NA		0	0	0	0	NA	NA
TTGGCCAAACTGGATTGACGAGC	23H-RNA	F55A4.9, rncs-1	34.641	26.2447	0	0	8.72102	1.29255e-06		0	0	0.0819556	0	5.1312	NA		0	0	0	0	NA	NA		0	0	1.10668	0	-1.43789	NA		0	0	0.556632	0	-0.70837	NA		0	0	1.04547	0	-1.07199	NA
AAATTCAAATTTAACTCCGTGAC	23H-RNA	Y69A2AR.16_hairpin	32.909	26.2447	0	0	8.6767	1.57891e-06		0	0	0	0	NA	NA		0	0	0	0.189386	3.53881	NA		0	0	0	0	NA	NA		1.03382	0	0	0	1.98461	NA		0	0	0	0	NA	NA
CCGGCCCTTACCGTTTAATACA	23H-RNA	mir-5592	32.909	49.2089	0.906647	0.346508	6.08073	1.48838e-07		31.073	77.5483	0.573689	0.412734	6.77796	1.12342e-17		150.892	120.01	0.890462	0.757545	7.36006	6.79719e-33		0.891713	1.24467	3.32005	0.735703	-0.89982	NA		2.06763	1.41421	3.89642	5.6811	-1.42585	NA		0	1.75743	0.522735	3.64083	-1.4041	NA
TCCGATTTCTGCCCCCCAAAATG	23H-RNA	PAL5A	32.909	19.6835	0	0	8.52154	3.86315e-06		0	0	0	0	NA	NA		0	0	0	0	NA	NA		0	0	0	0	NA	NA		0	0	0	0	NA	NA		0	0	0	0	NA	NA
TGACATGGAGATTAGATAACA	23H-RNA	Y37E11B.2	32.909	32.8059	0	0	8.81621	7.37239e-07		0	0	0	0	NA	NA		0	0	0	0	NA	NA		0	1.24467	1.10668	0.735703	-0.677236	NA		0	0	0	0	NA	NA		0	0	0	0	NA	NA
AGAAACTTGGACTTTTTCGCTGG	23H-RNA	F55A4.9, rncs-1	31.1769	52.4895	0	0.346508	7.70627	7.36128e-06		0	0	0.0819556	0	5.1312	NA		0	0	0.445231	0	2.24622	NA		0	0	1.10668	0	-1.43789	NA		0	0	0	0	NA	NA		0	0	0	0	NA	NA
AGCAGAAACTATATGGAACAT	23H-RNA	F39E9.29_region	31.1769	26.2447	0	0	8.63093	1.97002e-06		0	0	0	0	NA	NA		0	0	0	0	NA	NA		0	0	1.10668	0	-1.43789	NA		0	0	0	0	NA	NA		22.1336	5.2723	0	0	6.77812	0.00636787
ATGTTTCTGAGATGTCTTCAC	23H-RNA	F43E2.6	31.1769	6.56118	0	0	8.0768	5.75958e-05		0	0	0	0	NA	NA		0	0	0.14841	0	3.71683	NA		0	0	0	0	NA	NA		0	0	0	0	NA	NA		0	0	0	0	NA	NA
TCATCTCTGATCTTTTCCAATTC	23H-RNA	F55A4.9, rncs-1	31.1769	32.8059	0	0	8.77464	9.15238e-07		0	0	0.0819556	0	5.1312	NA		0	0	0	0	NA	NA		0	0	0	0	NA	NA		0	0	0	0	NA	NA		0	0	0	0	NA	NA
TCTTGCTTCTGTTCCAAATATG	23H-RNA	F19B2.5	31.1769	22.9641	0	0	8.55315	3.0388e-06		0	0	0	0	NA	NA		0	0	0.14841	0	3.71683	NA		0	0	0	0	NA	NA		0	0	0	0	NA	NA		0	0	0	0	NA	NA
TGAAGACATCTCAGAAACATCG	23H-RNA	F43E2.6	31.1769	42.6477	0	0	8.96653	3.35977e-07		0	8.61648	0	0	7.88001	NA		0	0	0	0	NA	NA		0	0	0	2.20711	-2.5407	NA		0	0	0	0	NA	NA		0	0	0	0	NA	NA
TGATGGCGTGGAAGAAGTTGATG	23H-RNA	Y57G11C.1145_hairpin	31.1769	22.9641	0	0	8.55315	3.0388e-06		0	0	0	0	NA	NA		0	0	0	0	NA	NA		0	0	0	0	NA	NA		0	0	0	0	NA	NA		0	0	0	0	NA	NA
TGGCCAAGCGGACTGGAGCACA	23H-RNA	F55A4.9, rncs-1	31.1769	19.6835	0	0	8.47071	4.89694e-06		0	0	0	0	NA	NA		0	0	0	0	NA	NA		0	0	0	0	NA	NA		0	0	0	0	NA	NA		0	0	0	0	NA	NA
ATGCTCGTCGATCCAGTTTGGCC	23H-RNA	F55A4.9, rncs-1	29.4449	36.0865	0	0	8.8006	7.98843e-07		0	0	0	0	NA	NA		0	0	0	0	NA	NA		0	0	0	0	NA	NA		0	0	0	0	NA	NA		0	0	0	0	NA	NA
CGCGCGCCGCTATGTTTAACTC	23H-RNA	PALTA3	29.4449	16.403	0	0	8.32692	1.06734e-05		0	17.233	0	0	8.79786	0.164902		0	0	0.14841	0	3.71683	NA		0	0	0	0.735703	-1.13933	NA		0	0	0.556632	0	-0.70837	NA		0	0	0	0	NA	NA
CTCAAAATAATAAAACTGCGTGG	23H-RNA	PALTA3	29.4449	26.2447	0	0	8.58362	2.47633e-06		0	0	0	0	NA	NA		0	0	0	0	NA	NA		0	0	0	0	NA	NA		0	0	0	0	NA	NA		0	0	0	0	NA	NA
CTCGCCGCAGCCATCGTCGTCGT	23H-RNA	Y57G11C.1145_hairpin	29.4449	32.8059	0	0.346508	7.30335	4.15054e-05		0	0	0	0	NA	NA		0	0	0	0	NA	NA		0	0	0	0	NA	NA		0	0	0	0	NA	NA		0	0	0	0	NA	NA
TAACGAGACCGCTGAAAAAGTTT	23H-RNA	PAL5A	29.4449	16.403	0	0	8.32692	1.06734e-05		0	0	0	0	NA	NA		0	0	0	0	NA	NA		0	0	0	0	NA	NA		1.03382	0	0	0	1.98461	NA		0	0	0	0	NA	NA
TCAACAGACTGATGGACGATG	23H-RNA	C36A4.14	29.4449	39.3671	0	0	8.86629	5.71813e-07		10.3577	8.61648	0	0	8.91439	3.39448e-05		0	0	0	0	NA	NA		0	0	1.10668	0	-1.43789	NA		0	0	0	0	NA	NA		3.32005	0	0	0	3.74867	NA
TTGCTTTCCTCATCTCTGATCT	23H-RNA	F55A4.9, rncs-1	29.4449	13.1224	0	0	8.22923	1.90229e-05		0	0	0	0	NA	NA		0	0	0	0	NA	NA		0.891713	0	0	0	1.5999	NA		0	0	0	0	NA	NA		0	0	0	0	NA	NA
ACTGCCGCACGGTTTTGAAACTG	23H-RNA	DNA-8-1	27.7128	36.0865	0	0.346508	7.3298	3.71335e-05		0	0	0	0	NA	NA		0	0	0	0	NA	NA		0	0	0	0.735703	-1.13933	NA		0	0	0	0	NA	NA		0	0	0	0	NA	NA
ACTTCTTCCACGCCATCATCCAC	23H-RNA	Y57G11C.1145_hairpin	27.7128	13.1224	0	0	8.16698	2.50237e-05		0	0	0	0	NA	NA		0	0	0	0	NA	NA		0	0	0	0	NA	NA		0	0	0	0	NA	NA		0	0	0	0	NA	NA
AGCGACACGTTCTACGAGGGAAT	23H-RNA	F55A4.9, rncs-1	27.7128	29.5253	0	0	8.61323	2.08678e-06		0	0	0	0	NA	NA		0	0	0	0	NA	NA		0	0	0	0	NA	NA		0	0	0	0	NA	NA		0	0	0	0	NA	NA
ATATTTGGAACAGAAGCAAGA	23H-RNA	F19B2.5	27.7128	6.56118	0	0	7.93612	0.000103179		0	0	0	0	NA	NA		10.0595	0	0.14841	0	6.02702	NA		0	0	1.10668	0.735703	-2.24113	NA		0	0	0	0	NA	NA		0	3.51486	0	0	3.75055	NA
ATGACGACGACGATGGCTGCGGC	23H-RNA	Y57G11C.1145_hairpin	27.7128	6.56118	0	0.346508	6.51625	0.00149595		10.3577	17.233	0.0819556	0	8.08045	2.2366e-05		0	0	0	0	NA	NA		0	0	0	0	NA	NA		1.03382	0	0.556632	0	0.670767	NA		0	0	0	0	NA	NA
GAAGACATCTCAGAAACATCGGC	23H-RNA	F43E2.6	27.7128	26.2447	0.906647	0.693017	5.09658	1.8082e-05		0	0	0.327822	0.137578	2.88946	NA		0	0	0.445231	0.189386	1.74251	NA		0.891713	0	1.10668	0	-0.0248022	NA		0	1.41421	2.22653	0	-0.842225	NA		1.10668	0	0	0	2.36895	NA
TCACGGAGTTAAATTTGAATTTT	23H-RNA	Y69A2AR.16_hairpin	27.7128	26.2447	0	0	8.53468	3.14565e-06		0	0	0	0	NA	NA		0	0	0	0	NA	NA		0	0	0	0	NA	NA		0	0	0	0	NA	NA		0	0	0	0	NA	NA
TCACGGAGTTAAATTTGAATTTTT	23H-RNA	Y69A2AR.16_hairpin	27.7128	6.56118	0	0	7.93612	0.000103179		0	0	0	0.137578	4.75198	NA		15.0892	0	0	0	7.97265	NA		0	0	0	0	NA	NA		0	1.41421	0	0	2.21349	NA		0	0	0	0	NA	NA
TCAGGCCGCCGACATCTCATGGG	23H-RNA	PALTA3	27.7128	16.403	0	0	8.26862	1.38365e-05		0	0	0	0	NA	NA		0	0	0	0	NA	NA		0	0	0	0	NA	NA		0	0	0	0	NA	NA		0	0	0	0	NA	NA
TCGTCGTCATCCACTCCACCG	23H-RNA	Y57G11C.1145_hairpin	27.7128	29.5253	0	0	8.61323	2.08678e-06		0	8.61648	0.0819556	0	6.50802	NA		0	0	0	0	NA	NA		0	2.48933	1.10668	0	1.26943	NA		10.3382	2.82843	0	0	5.51004	NA		0	0	0	0	NA	NA
TGCTCGTCGATCCAGTTTGGCC	23H-RNA	F55A4.9, rncs-1	27.7128	52.4895	0	0	9.06999	2.18297e-07		0	0	0	0	NA	NA		0	0	0	0	NA	NA		0	0	0	0	NA	NA		0	0	0	0	NA	NA		0	0	0	0	NA	NA
TTACGAAGTGGGATTGGAAAATC	23H-RNA	F52G3.8	27.7128	32.8059	0.453323	0	7.23905	5.06731e-05		0	0	0	0	NA	NA		5.02973	0	0	0	6.49962	NA		0	0	0	0	NA	NA		1.03382	0	0	0	1.98461	NA		15.4935	24.6041	0	0	7.29467	0.00132983
TTCGCTCTCGATTTCGCATGCCG	23H-RNA	dnj-27_element	27.7128	32.8059	0	0	8.68771	1.42413e-06		0	0	0	0	NA	NA		0	0	0	0	NA	NA		0	0	0	0	NA	NA		0	0	0	0	NA	NA		0	0	0	0	NA	NA
AAGAACAAGCCGTGGGCAAGCA	23H-RNA	F39E9.7, F55A4.4	25.9808	42.6477	0	0	8.85165	6.48271e-07		0	0	0	0	NA	NA		0	0	0	0	NA	NA		0	0	0	0	NA	NA		0	0	0	0	NA	NA		22.1336	14.0595	0	0	7.16516	0.00191212
CTCGTCGATCCAGTTTGGCCA	23H-RNA	F55A4.9, rncs-1	25.9808	36.0865	0	0	8.71533	1.2656e-06		0	0	0	0	NA	NA		0	0	0.14841	0	3.71683	NA		0	0	0	0	NA	NA		0	0	0	0	NA	NA		0	0	0	0	NA	NA
CTTCTTCCACGCCATCATCCACA	23H-RNA	Y57G11C.1145_hairpin	25.9808	13.1224	0	0	8.10183	3.31566e-05		0	0	0	0	NA	NA		0	0	0	0	NA	NA		0	0	0	0	NA	NA		0	0	0	0	NA	NA		0	0	0	0	NA	NA
CTTTTTCAGCGGTCTCGTTATG	23H-RNA	PAL5A	25.9808	19.6835	0	0	8.30608	1.06065e-05		0	0	0	0	NA	NA		0	0	0	0	NA	NA		0	0	0	0	NA	NA		0	0	0	0	NA	NA		0	0	0	0	NA	NA
TCCGATTTCTGCCCCCCCAAAA	23H-RNA	PAL8C	25.9808	29.5253	0	0	8.56525	2.64533e-06		0	0	0	0	NA	NA		0	0	0	0	NA	NA		0	0	0	0	NA	NA		0	0	0	0	NA	NA		0	0	0	0	NA	NA
TCTCCTCGTCGAAATCAAAAGG	23H-RNA	Y105C5A.14	25.9808	19.6835	0	0	8.30608	1.06065e-05		0	0	0	0	NA	NA		0	0	0	0	NA	NA		0	0	0	0	NA	NA		0	0	0	0	NA	NA		0	0	0	0	NA	NA
TTCTACAGAAGGGACGCCGGAAA	23H-RNA	other	25.9808	6.56118	0	0	7.86009	0.000139325		0	0	0	0	NA	NA		0	0	0	0	NA	NA		0	0	0	0	NA	NA		1.03382	0	0	0	1.98461	NA		0	0	0	0	NA	NA
TTGGTTGGTCCCCGAATTTTGCC	23H-RNA	PALTA3	25.9808	16.403	0	0	8.20779	1.8205e-05		0	0	0	0	NA	NA		5.02973	0	0	0.568159	3.3343	NA		0	0	0	0	NA	NA		0	0	0	0	NA	NA		0	0	0	0	NA	NA
AAGTATGATTGATATTGGGAAC	23H-RNA	Y59H11AR.6	24.2487	22.9641	0	0	8.34204	8.44103e-06		0	0	0	0	NA	NA		0	0	0	0	NA	NA		0	0	0	0	NA	NA		0	0	0	0	NA	NA		0	0	0	0.910207	-0.728152	NA
AATCGGAAACTCAAAGACCACA	23H-RNA	Y17D7C.3	24.2487	55.7701	0	0.693017	6.65704	1.31191e-06		0	0	0.0819556	0	5.1312	NA		5.02973	6.66725	0.14841	0	6.12723	NA		0	0	0	0	NA	NA		0	0	1.11326	0	-1.38496	NA		47.5873	7.02973	0.522735	0	6.37989	0.00334768
ACGTGTCGCTTCGTCATCTGA	23H-RNA	F55A4.9, rncs-1	24.2487	22.9641	0	0	8.34204	8.44103e-06		0	0	0	0.137578	4.75198	NA		0	0	0	0	NA	NA		0	0	1.10668	0	-1.43789	NA		0	0	0.556632	0	-0.70837	NA		0	0	0	0.910207	-0.728152	NA
AGTGGGCCGAGCGATTCGCTGAT	23H-RNA	Y116A8C.27	24.2487	32.8059	0	0	8.59523	2.30196e-06		0	0	0	0	NA	NA		0	0	0	0	NA	NA		0	0	0	0	NA	NA		0	0	0	0	NA	NA		0	0	0	0	NA	NA
ATAACGAGACCGCTGAAAAAGTT	23H-RNA	PAL5A	24.2487	6.56118	0	0	7.77972	0.000191684		0	0	0	0	NA	NA		0	0	0	0	NA	NA		0	0	0	0	NA	NA		0	0	0.556632	0	-0.70837	NA		0	0	0	0.910207	-0.728152	NA
CCATCAGCACCAACACCTCACCC	23H-RNA	C36A4.14	24.2487	22.9641	0	0	8.34204	8.44103e-06		0	0	0	0.137578	4.75198	NA		0	0	0	0	NA	NA		0	0	0	0	NA	NA		0	0	0	0	NA	NA		0	0	0	0	NA	NA
CGGACTGGAGCACATTGGAAAAA	23H-RNA	F55A4.9, rncs-1	24.2487	3.28059	0	0	7.63049	0.000480699		0	0	0	0	NA	NA		0	0	0	0	NA	NA		0	0	0	0	NA	NA		0	0	0	0	NA	NA		0	0	0	0	NA	NA
CGTGAGATGTCGGCGGCCTGATA	23H-RNA	PALTA3	24.2487	3.28059	0	0	7.63049	0.000480699		0	0	0	0	NA	NA		0	0	0	0	NA	NA		0	0	0	0	NA	NA		0	0	0	0	NA	NA		0	0	0	0	NA	NA
CTCATCTCTGATCTTTTCCAATT	23H-RNA	F55A4.9, rncs-1	24.2487	42.6477	0	0	8.81132	8.18258e-07		0	0	0	0	NA	NA		0	0	0	0	NA	NA		0	0	0	0	NA	NA		0	0	0	0	NA	NA		0	0	0	0	NA	NA
GTTTGGCCAAGCGGACTGGAGC	23H-RNA	F55A4.9, rncs-1	24.2487	16.403	0	0	8.1442	2.42799e-05		0	0	0	0	NA	NA		0	0	0	0	NA	NA		0	0	0	0	NA	NA		0	0	0	0	NA	NA		0	0	0	0	NA	NA
TCAATGACGGAGTCGAGATCGA	23H-RNA	Y37E11B.2	24.2487	16.403	0	0	8.1442	2.42799e-05		0	25.8494	0.0819556	0	8.03478	0.0347367		0	6.66725	0	0	6.67224	NA		0	0	1.10668	0.735703	-2.24113	NA		0	0	0.556632	0	-0.70837	NA		0	0	0	0	NA	NA
TCAATGACGGAGTCGAGATCGAC	23H-RNA	Y37E11B.2	24.2487	42.6477	0.453323	0.346508	6.37554	4.55504e-06		20.7154	43.0824	0.409778	0	7.06217	1.18808e-10		95.5649	66.6725	0.445231	0.378772	7.62655	9.37169e-20		0.891713	0	1.10668	2.20711	-1.72188	NA		1.03382	0	0.556632	0	0.670767	NA		1.10668	0	0	0.910207	0.644821	NA
TTCCTCATCTCTGATCTTTTCC	23H-RNA	F55A4.9, rncs-1	24.2487	29.5253	0	0.346508	7.08801	0.000105164		0	8.61648	0	0	7.88001	NA		0	0	0	0	NA	NA		0	0	0	0	NA	NA		0	0	0	0	NA	NA		0	1.75743	0	0.910207	0.970094	NA
TTGTGAAGACATCTCAGAAACA	23H-RNA	F43E2.6	24.2487	16.403	0	0	8.1442	2.42799e-05		0	8.61648	0	0.137578	6.42587	NA		10.0595	6.66725	0	0	8.104	0.000584081		0	0	0	0	NA	NA		0	1.41421	0	0	2.21349	NA		0	0	0	0	NA	NA
AATCGGAAACTCAAAGACCAC	23H-RNA	Y17D7C.3	22.5167	22.9641	0	0	8.28396	1.1135e-05		0	0	0	0	NA	NA		0	0	0	0	NA	NA		0	0	0	0	NA	NA		0	0	0.556632	0	-0.70837	NA		2.21336	0	0	0.910207	1.49618	NA
ACGGAGTTAAATTTGAATTTTTT	23H-RNA	Y69A2AR.16_hairpin	22.5167	9.84177	0	0	7.83484	0.000123095		0	0	0	0	NA	NA		0	0	0	0	NA	NA		0	0	0	0	NA	NA		0	1.41421	0	0	2.21349	NA		0	0	0	0	NA	NA
AGAGGTCCAAGTAAGATGATAGC	23H-RNA	F39E9.7	22.5167	22.9641	0	0	8.28396	1.1135e-05		0	0	0	0	NA	NA		0	0	0	0	NA	NA		0	0	0	0	NA	NA		0	0	0	0	NA	NA		0	0	0	0	NA	NA
CATGAGATGTCGGCGGCCTGATA	23H-RNA	PALTA3	22.5167	16.403	0	0	8.0776	3.2704e-05		0	0	0	0	NA	NA		0	0	0	0	NA	NA		0	0	0	0	NA	NA		0	0	0	0	NA	NA		0	0	0	0	NA	NA
CCATCGTCGTCGTCATCCACTCC	23H-RNA	Y57G11C.1145_hairpin	22.5167	16.403	0	0	8.0776	3.2704e-05		0	0	0	0.137578	4.75198	NA		0	0	0	0	NA	NA		0	0	0	0	NA	NA		0	0	0	0	NA	NA		0	0	0	0	NA	NA
CTGTTCTGCTCTCTCTTTCAGCT	23H-RNA	F55A4.9, rncs-1	22.5167	22.9641	0	0	8.28396	1.1135e-05		0	0	0.0819556	0	5.1312	NA		0	0	0	0	NA	NA		0	0	0	0	NA	NA		0	0	0	0	NA	NA		0	0	0	0	NA	NA
TCCGCGCGCCGCTATGTTTAAC	23H-RNA	PALTA3	22.5167	16.403	0	0	8.0776	3.2704e-05		0	0	0.0819556	0.275156	3.29828	NA		0	0	0	0	NA	NA		0	0	0	0	NA	NA		0	0	0	0	NA	NA		0	0	0	0	NA	NA
TCTCTCGTAGAACGTGTCGCTTC	23H-RNA	F55A4.9, rncs-1	22.5167	39.3671	0	0	8.69911	1.44286e-06		10.3577	0	0	0.137578	6.46021	NA		0	0	0	0	NA	NA		0	0	0	0.735703	-1.13933	NA		0	0	0.556632	0	-0.70837	NA		0	0	0	0	NA	NA
TCTTTCATCGTACGACGCTGTT	23H-RNA	F52G3.8	22.5167	19.6835	0	0	8.18456	1.86207e-05		10.3577	0	0.0819556	0.137578	5.50629	NA		0	0	0	0.189386	3.53881	NA		0	0	0	0	NA	NA		2.06763	0	1.11326	0	0.822466	NA		42.0539	7.02973	1.04547	0	5.32952	0.00543634
TTCTGTGGGCGGGGCCAATCCC	23H-RNA	DNA-8-1	22.5167	13.1224	0	0	7.96166	6.09077e-05		0	8.61648	0	0	7.88001	NA		0	0	0	0	NA	NA		0	0	0	0	NA	NA		0	0	0	0	NA	NA		0	0	0	0	NA	NA
AAATTGTCGGCCGCCGTGGAAAC	23H-RNA	Unknown_hairpin_RE2	20.7846	29.5253	0	0	8.41101	5.90421e-06		0	25.8494	0	0	9.37881	0.136007		5.02973	0	0	0	6.49962	NA		0.891713	0	1.10668	0	-0.0248022	NA		0	0	0	0	NA	NA		0	0	0	0.910207	-0.728152	NA
ACCTGAACTTTTTGGATCAACA	23H-RNA	T05E12.10	20.7846	32.8059	0	0	8.49655	3.88716e-06		0	0	0	0	NA	NA		0	0	0	0	NA	NA		0	0	0	0	NA	NA		0	0	0	0	NA	NA		7.74677	0	0	0	4.9681	NA
CGATGTTTCTGAGATGTCTTCA	23H-RNA	F43E2.6	20.7846	6.56118	0.453323	0	6.14349	0.00433557		0	0	0.0819556	0	5.1312	NA		0	0	0	0	NA	NA		0	0	0	0	NA	NA		0	0	0	0	NA	NA		0	0	0	0	NA	NA
CGGCTCTTCGAGCGCGTCTTCTT	23H-RNA	ChrIII_hairpin1	20.7846	22.9641	0	0	8.22342	1.49332e-05		0	0	0	0	NA	NA		0	0	0	0	NA	NA		0	0	1.10668	0	-1.43789	NA		0	0	0	0	NA	NA		0	0	0.522735	0	-0.322129	NA
CTATCTACACTCTCTGTACCGG	23H-RNA	Unknown_RE2	20.7846	13.1224	0.453323	0.346508	5.45077	0.000957829		0	0	0.0819556	0	5.1312	NA		0	0	0.14841	0	3.71683	NA		0	0	0	0	NA	NA		0	0	0	0	NA	NA		0	0	0	0	NA	NA
CTGTTCTGCTCTCTCTTTCAGCTC	23H-RNA	F55A4.9, rncs-1	20.7846	49.2089	0	0	8.86388	7.20713e-07		0	0	0	0	NA	NA		0	0	0	0	NA	NA		0	0	0	0	NA	NA		0	0	0	0	NA	NA		0	0	0	0	NA	NA
TAAACATAGCGGCGCGCGGAACT	23H-RNA	PALTA3, talp-3, Y48A6C.4, Y57G11C.32	20.7846	16.403	0	0	8.00769	4.47612e-05		0	34.4659	0.163911	0.275156	6.45255	1.59657e-06		0	0	0.14841	0	3.71683	NA		0	0	0	0.735703	-1.13933	NA		0	0	0	0	NA	NA		0	0	0	0.910207	-0.728152	NA
TACAACGTGGAGCTAAGACACC	23H-RNA	F55C9.3	20.7846	16.403	0	0	8.00769	4.47612e-05		10.3577	8.61648	0	0.137578	7.46782	0.000414068		15.0892	0	0	0.189386	6.52161	NA		0	1.24467	0	1.47141	-0.406696	NA		0	0	1.11326	0	-1.38496	NA		8.85346	5.2723	0	0.910207	4.2869	0.13245
TGCGTGGCGTGTACTGCAGAAAAC	23H-RNA	PALTA3	20.7846	22.9641	0	0	8.22342	1.49332e-05		0	0	0.0819556	0	5.1312	NA		5.02973	0	0	0	6.49962	NA		0	1.24467	0	0.735703	0.44975	NA		0	0	0	0	NA	NA		0	0	0	0	NA	NA
TGGACTTTTTCGCTGGTTTGGTG	23H-RNA	F55A4.9, rncs-1	20.7846	26.2447	0	0.346508	6.8935	0.000233303		0	0	0.0819556	0	5.1312	NA		0	0	0	0	NA	NA		0	0	0	0.735703	-1.13933	NA		0	0	0	0	NA	NA		0	1.75743	0	0	2.70729	NA
TTGTGAAGACATCTCAGAAAC	23H-RNA	F43E2.6	20.7846	29.5253	0	1.03953	5.44738	5.50181e-05		20.7154	34.4659	0.409778	0	6.84632	1.42764e-09		45.2676	20.0017	0.296821	0.189386	7.07682	3.37293e-09		0	0	0	2.20711	-2.5407	NA		3.10145	0	2.78316	0	0.119293	NA		0	1.75743	0.522735	0.910207	0.166062	NA
AAAAAATATGGATAAGATGATG	23H-RNA	F55A4.9, rncs-1	19.0526	19.6835	0	0	8.05165	3.46031e-05		0	0	0	0	NA	NA		0	0	0	0	NA	NA		0	0	0	0	NA	NA		0	0	0	0	NA	NA		0	0	0	0	NA	NA
AAAGAATCCATTGTCCAGCTCC	23H-RNA	F55A4.9, rncs-1	19.0526	13.1224	0	0	7.80597	0.00012007		0	0	0.0819556	0	5.1312	NA		5.02973	0	0	0.189386	5.01117	NA		0	0	0	0	NA	NA		0	0	0	0	NA	NA		0	0	0	0	NA	NA
AGCCAATATCGGACGATGAAGCC	23H-RNA	other	19.0526	0	0	0	7.11194	0.00533175		0	0	0	0	NA	NA		5.02973	6.66725	0	0	7.55263	NA		0	0	0	0	NA	NA		0	0	0	0	NA	NA		0	0	0	0	NA	NA
CTCCTCGGTCTTGACGAAATCC	23H-RNA	C36A4.14	19.0526	9.84177	0	0	7.66461	0.000245871		0	0	0.0819556	0	5.1312	NA		0	0	0	0	NA	NA		0	0	0	0	NA	NA		0	0	0.556632	0	-0.70837	NA		1.10668	0	0	0	2.36895	NA
CTTCGTCATCTGATGCGGTTGTTC	23H-RNA	F55A4.9, rncs-1	19.0526	32.8059	0	0	8.44464	5.17763e-06		0	0	0	0	NA	NA		0	0	0	0	NA	NA		0	0	0	0.735703	-1.13933	NA		0	0	0	0	NA	NA		0	0	0	0	NA	NA
TAAACATAGCGGCGCGCGGAACA	23H-RNA	PALTA3	19.0526	19.6835	0	0	8.05165	3.46031e-05		0	0	0.163911	0.137578	3.52423	NA		0	0	0.14841	0	3.71683	NA		0	0	0	0	NA	NA		1.03382	0	0.556632	0	0.670767	NA		0	0	0	0	NA	NA
TAGACGGTGTGGGTCAACGAGC	23H-RNA	T05E12.8	19.0526	16.403	0.453323	0	6.47867	0.00108935		20.7154	0	0	0	9.03919	0.15342		5.02973	13.3345	0.14841	0	6.73971	0.00291603		0	0	0	0	NA	NA		3.10145	0	0	0	3.43459	NA		0	0	1.04547	0.910207	-1.93267	NA
TCAACTTCTTCCACGCCATCATC	23H-RNA	Y57G11C.1145_hairpin	19.0526	6.56118	0	0	7.50662	0.000557475		0	0	0	0	NA	NA		0	0	0	0	NA	NA		0	0	0	0	NA	NA		0	0	0	0	NA	NA		0	0	0	0	NA	NA
TCCACGGCGGCCGACAATTTCC	23H-RNA	Unknown_hairpin_RE2	19.0526	9.84177	0	0	7.66461	0.000245871		0	8.61648	0	0	7.88001	NA		0	0	0	0	NA	NA		0	0	0	0	NA	NA		0	0	0	0	NA	NA		0	0	0	0	NA	NA
TTAAACATAGCGGCGCGCGGAA	23H-RNA	PALTA3	19.0526	13.1224	0	0	7.80597	0.00012007		0	0	0	0	NA	NA		10.0595	6.66725	0.296821	0	5.72582	0.00435372		0	0	0	0	NA	NA		7.23671	0	0	0	4.65505	NA		0	0	0	0	NA	NA
TTCCTCATCTCTGATCTTTTCCA	23H-RNA	F55A4.9, rncs-1	19.0526	19.6835	0	0	8.05165	3.46031e-05		0	8.61648	0	0.137578	6.42587	NA		0	0	0	0	NA	NA		0	0	0	0	NA	NA		0	0	0	0	NA	NA		0	0	0	0	NA	NA
TTTCTGTCATCACCCGCGGGGCT	23H-RNA	other	19.0526	22.9641	0	0	8.16022	2.03455e-05		0	0	0	0	NA	NA		5.02973	0	0	0	6.49962	NA		0	0	0	0	NA	NA		0	0	0	0	NA	NA		0	0	0	0	NA	NA
TTTTCGGGGTACGGTATCTAAT	23H-RNA	ChrIII_hairpin2	19.0526	3.28059	0	0	7.32648	0.00146328		10.3577	0	0.245867	0.137578	4.56983	NA		5.02973	0	0.14841	0.189386	4.07997	NA		0	0	0	0	NA	NA		1.03382	0	0	1.13622	0.207999	NA		0	0	0	0	NA	NA
ACGGAGTTAAATTTGAATTTTT	23H-RNA	Y69A2AR.16_hairpin	17.3205	16.403	0.453323	0.346508	5.41982	0.00100962		0	0	0	0.137578	4.75198	NA		10.0595	6.66725	0	0.189386	6.64959	0.00332828		0	0	0	0.735703	-1.13933	NA		3.10145	1.41421	1.11326	0	1.85816	NA		0	3.51486	0	0	3.75055	NA
ATCTCTGATCTTTTCCAATTCTT	23H-RNA	F55A4.9, rncs-1	17.3205	22.9641	0	0	8.09413	2.8106e-05		0	0	0	0	NA	NA		0	0	0	0	NA	NA		0	0	0	0	NA	NA		0	0	0	0	NA	NA		0	0	0	0	NA	NA
ATGTTTCTGAGATGTCTTCACAA	23H-RNA	F43E2.6	17.3205	13.1224	0	0	7.72117	0.000170986		0	0	0	0	NA	NA		0	0	0	0	NA	NA		0	0	0	0	NA	NA		0	0	0	0	NA	NA		0	0	0	0	NA	NA
CCGGCCCTTACCGTTTAATAC	23H-RNA	mir-5592	17.3205	16.403	0	0.346508	6.4332	0.00139781		0	17.233	0.0819556	0.275156	5.83468	0.00114035		15.0892	0	0.14841	0	6.59593	NA		0	0	1.10668	0	-1.43789	NA		1.03382	0	0.556632	0	0.670767	NA		0	0	0	0	NA	NA
CGGACGGGAGCCAAGTTTGCACC	23H-RNA	other	17.3205	9.84177	0	0	7.57112	0.000359108		0	0	0	0	NA	NA		0	0	0	0	NA	NA		0	0	0	0	NA	NA		0	0	0	0	NA	NA		0	0	0	0	NA	NA
GACATCTCAGAAACATCGGCA	23H-RNA	F43E2.6	17.3205	3.28059	0	0	7.20862	0.00219386		0	0	0.0819556	0	5.1312	NA		0	0	0.14841	0	3.71683	NA		0	0	0	0	NA	NA		0	0	0	0	NA	NA		0	1.75743	0	0	2.70729	NA
TCAAAATCGGACGACCGGACGC	23H-RNA	Unknown_hairpin_RE2	17.3205	6.56118	0	0	7.40241	0.000827987		0	0	0	0	NA	NA		0	0	0	0	NA	NA		0	0	0	0	NA	NA		0	0	0	0	NA	NA		0	0	0	0	NA	NA
TCGAGAAATGACGAGAAATTCAC	23H-RNA	Unknown_RE4	17.3205	3.28059	0	1.03953	4.28703	0.036555		134.65	336.043	1.96693	0.68789	7.42507	5.58836e-26		311.843	186.683	1.92933	0	7.97667	4.30022e-10		2.67514	1.24467	7.74677	7.35703	-1.90661	0.324433		9.30434	0	1.11326	0	2.8863	NA		1.10668	1.75743	2.09094	0	0.369381	NA
TCTTCCACGCCATCATCCACATC	23H-RNA	Y57G11C.1145_hairpin	17.3205	19.6835	0	0	7.98026	4.83191e-05		0	0	0	0	NA	NA		0	0	0	0	NA	NA		0	0	0	0	NA	NA		0	0	0	0	NA	NA		0	0	0	0	NA	NA
TGAGACATGGTATCGAGATATG	23H-RNA	Y37E11B.2	17.3205	16.403	0	0	7.85662	8.83516e-05		0	8.61648	0	0	7.88001	NA		0	0	0	0	NA	NA		0	0	0	0	NA	NA		0	0	0	0	NA	NA		0	1.75743	0	0	2.70729	NA
TGATCTACAAAAAATGCGGGAAT	23H-RNA	CELE14B	17.3205	6.56118	0	0	7.40241	0.000827987		0	0	0	0	NA	NA		15.0892	0	0	0	7.97265	NA		0	0	0	0	NA	NA		0	1.41421	0	0	2.21349	NA		0	0	0	0	NA	NA
TGCAAATGAAATCGTGGGCGGG	23H-RNA	mir-5550_RE	17.3205	13.1224	0	0	7.72117	0.000170986		0	0	0	0	NA	NA		0	0	0	0	NA	NA		0	0	0	0	NA	NA		0	0	0	0	NA	NA		0	0	0	0	NA	NA
TGGACCATCCGCAACAGTGATA	23H-RNA	F57G8.14, F57G8.15, linc-59	17.3205	19.6835	0	0	7.98026	4.83191e-05		10.3577	0	0	0	8.01412	NA		0	0	0	0	NA	NA		0	0	0	0	NA	NA		0	0	0	0	NA	NA		0	0	0	0	NA	NA
TGTGAAGACATCTCAGAAACATC	23H-RNA	F43E2.6	17.3205	6.56118	0	0	7.40241	0.000827987		0	0	0	0.137578	4.75198	NA		0	0	0	0	NA	NA		0	0	0	0	NA	NA		0	0	0	0	NA	NA		0	0	0	0	NA	NA
TGTGGATGATGGCGTGGAAGA	23H-RNA	Y57G11C.1145_hairpin	17.3205	9.84177	0	0	7.57112	0.000359108		0	0	0	0	NA	NA		0	0	0	0	NA	NA		0	0	0	0	NA	NA		0	0	0	0	NA	NA		0	0	0	0	NA	NA
TTGTGTCGACAACTAATTCCCGA	23H-RNA	T05E12.8	17.3205	3.28059	0	0	7.20862	0.00219386		0	0	0	0	NA	NA		0	6.66725	0	0	6.67224	NA		0	0	0	0	NA	NA		1.03382	0	0.556632	1.13622	-0.50627	NA		0	0	0	0	NA	NA
TTTGGCATCGCCCGTGGTATTCC	23H-RNA	T05E12.8	17.3205	55.7701	0	0	8.91696	6.84114e-07		0	8.61648	0	0	7.88001	NA		0	0	0	0	NA	NA		0	0	0	0	NA	NA		0	0	0.556632	0	-0.70837	NA		0	0	0	0	NA	NA
TTTTCGGGGTACGGTATCTAATA	23H-RNA	ChrIII_hairpin2	17.3205	9.84177	0	0.346508	6.15136	0.0040369		0	0	0	0	NA	NA		5.02973	0	0	0	6.49962	NA		0	0	0	0	NA	NA		0	0	0	0	NA	NA		0	0	0	0	NA	NA
AAGCGACACGTTCTACGAGGG	23H-RNA	F55A4.9, rncs-1	15.5885	13.1224	0	0	7.63099	0.000249064		0	0	0	0	NA	NA		0	0	0	0	NA	NA		0	0	0	0	NA	NA		0	0	0	0	NA	NA		0	0	0	0	NA	NA
AAGCGGACTGGAGCACATTGGA	23H-RNA	F55A4.9, rncs-1	15.5885	13.1224	0	0	7.63099	0.000249064		0	0	0	0.137578	4.75198	NA		0	0	0	0	NA	NA		0	0	0	0	NA	NA		0	0	0	0	NA	NA		0	0	0	0	NA	NA
AATCGGGATGGATCGATGGATT	23H-RNA	T05E12.10	15.5885	26.2447	0	0	8.13564	2.37651e-05		0	0	0	0	NA	NA		5.02973	6.66725	0	0.189386	6.08594	NA		0	0	0	0	NA	NA		2.06763	0	0	0	2.85028	NA		27.667	0	0	0	6.77173	0.349031
AGTCAGTTGGATGGGAAAATG	23H-RNA	W04B5.8	15.5885	16.403	0	0.346508	6.35145	0.00187062		10.3577	8.61648	0	0.137578	7.46782	0.000414068		5.02973	0	0	0	6.49962	NA		0	0	0	0	NA	NA		0	0	0	0	NA	NA		2.21336	1.75743	0.522735	0	2.62096	NA
ATATTTGGAACAGAAGCAAGAG	23H-RNA	F19B2.5	15.5885	13.1224	0	0	7.63099	0.000249064		0	0	0	0	NA	NA		5.02973	6.66725	0	0	7.55263	NA		0	0	0	0	NA	NA		0	0	0	0	NA	NA		0	0	0	0	NA	NA
ATCCTCGCCGCAGCCATCGTCGT	23H-RNA	Y57G11C.1145_hairpin	15.5885	22.9641	0	0	8.0249	3.93008e-05		0	0	0	0	NA	NA		0	0	0	0	NA	NA		0	0	0	0	NA	NA		0	0	0	0	NA	NA		0	0	0	0	NA	NA
ATGTGGATGATGGCGTGGAAGA	23H-RNA	Y57G11C.1145_hairpin	15.5885	9.84177	0	0	7.471	0.00053169		0	8.61648	0	0	7.88001	NA		0	0	0	0	NA	NA		0	0	1.10668	0	-1.43789	NA		2.06763	0	0	0	2.85028	NA		0	0	0	0	NA	NA
CATCATCCTCGCCGCAGCCATCGT	23H-RNA	Y57G11C.1145_hairpin	15.5885	9.84177	0	0	7.471	0.00053169		0	0	0	0	NA	NA		0	0	0	0	NA	NA		0	0	0	0	NA	NA		0	0	0	0	NA	NA		0	0	0	0	NA	NA
CCCGCGGGTGATGACAGAAACGG	23H-RNA	dnj-27_element	15.5885	16.403	0	0.346508	6.35145	0.00187062		0	0	0	0	NA	NA		0	0	0	0	NA	NA		0	0	0	0	NA	NA		0	0	0	0	NA	NA		0	0	0	0	NA	NA
GAAGGGCAAAGAGTGCGATATC	23H-RNA	jmjc-1, T28F2.4	15.5885	26.2447	0	0.346508	6.70945	0.000495335		0	0	0.0819556	0	5.1312	NA		0	0	0.14841	0	3.71683	NA		0	0	0	0.735703	-1.13933	NA		0	0	0	0	NA	NA		0	0	0	0	NA	NA
GAATTGTGAAGACATCTCAGAAA	23H-RNA	F43E2.6	15.5885	13.1224	0	0.346508	6.20946	0.0030889		0	0	0.0819556	0	5.1312	NA		0	0	0	0	NA	NA		0	0	0	0.735703	-1.13933	NA		0	0	0	0	NA	NA		0	0	0	0	NA	NA
GTGGAGTGGATGACGACGACG	23H-RNA	Y57G11C.1145_hairpin, Y57G11C.51	15.5885	13.1224	1.81329	0.346508	3.80304	0.0128708		0	0	0.901511	1.2382	0.703755	NA		0	6.66725	2.22615	2.46202	0.319292	NA		5.35028	2.48933	4.42673	4.41422	-0.150122	0.953756		15.5072	8.48528	5.56632	5.6811	1.10884	0.405317		5.53341	7.02973	6.27282	9.10207	-0.292469	0.914646
TAACGAGACCGCTGAAAAAGTT	23H-RNA	PAL5A	15.5885	26.2447	0	0	8.13564	2.37651e-05		0	8.61648	0	0	7.88001	NA		0	0	0	0	NA	NA		0	0	0	0	NA	NA		0	0	0	0	NA	NA		0	0	0	0	NA	NA
TCCATTGTATTTTCTCAGGACC	23H-RNA	F39E9.28	15.5885	13.1224	0	0	7.63099	0.000249064		0	8.61648	0	0	7.88001	NA		0	0	0.296821	0	2.82578	NA		0	0	0	0	NA	NA		0	0	0	0	NA	NA		0	0	0	0	NA	NA
TCCGGTTCAGAGCAGATGACA	23H-RNA	Y17D7C.3	15.5885	16.403	0	0.693017	5.39574	0.00172386		0	8.61648	0	0.137578	6.42587	NA		45.2676	6.66725	0.14841	0.189386	7.33021	5.83513e-06		0	0	0	1.47141	-1.95658	NA		0	0	0	0	NA	NA		6.64009	1.75743	0	0	5.07378	NA
TCTCTGTGTGCTGGTAAGTGGA	23H-RNA	Y57G11C.51	15.5885	9.84177	0	0	7.471	0.00053169		0	0	0	0.137578	4.75198	NA		0	0	0	0	NA	NA		0	0	0	0	NA	NA		0	0	0	0	NA	NA		0	0	0	0	NA	NA
TGATCTACCTGTTGAACTTGACT	23H-RNA	TIR54TA1	15.5885	16.403	0	0	7.77462	0.00012716		0	0	0	0	NA	NA		0	0	0	0	NA	NA		0	0	0	0	NA	NA		0	0	0	0	NA	NA		0	0	0	0	NA	NA
TGCAGAGAGCCTAAGGAGCATC	23H-RNA	other	15.5885	13.1224	0	0	7.63099	0.000249064		0	0	0	0	NA	NA		0	0	0	0	NA	NA		0	0	0	0	NA	NA		0	0	0	0	NA	NA		0	0	0	0	NA	NA
TGCTCGTCGATCCAGTTTGGCCA	23H-RNA	F55A4.9, rncs-1	15.5885	9.84177	0	0	7.471	0.00053169		0	0	0	0	NA	NA		0	0	0	0	NA	NA		0	0	0	0	NA	NA		0	0	0	0	NA	NA		0	0	0	0	NA	NA
TTAGATACCGTACCCCGAAAACT	23H-RNA	ChrIII_hairpin2	15.5885	13.1224	0	0	7.63099	0.000249064		10.3577	8.61648	0	0	8.91439	3.39448e-05		0	0	0.14841	0	3.71683	NA		0	0	0	0	NA	NA		0	0	0	0	NA	NA		0	0	0	0	NA	NA
TTCGCGTAGATCACATGTAGATC	23H-RNA	pcp-4, Unknown_RE8, Y116F11B.3, Y15E3A.3, Y6B3B.7, Y6B3B.9	15.5885	6.56118	0	0	7.2899	0.0012604		0	34.4659	0	0.275156	7.02141	0.157628		15.0892	0	0	0.378772	5.43643	NA		0.891713	0	1.10668	0	-0.0248022	NA		0	0	0.556632	1.13622	-1.90807	NA		0	0	0	0	NA	NA
TTTTAAAACCGTGCGGCAGTTGC	23H-RNA	DNA-8-1	15.5885	22.9641	0	0	8.0249	3.93008e-05		0	0	0	0	NA	NA		0	0	0	0	NA	NA		0	0	0	0	NA	NA		0	0	0	0	NA	NA		0	0	0	0	NA	NA
TTTTGCTGATCTCTCTTCTCGG	23H-RNA	ChrIII_hairpin1	15.5885	6.56118	0.453323	0.346508	4.85522	0.0124963		10.3577	0	0.0819556	0	6.53162	NA		0	6.66725	0	0	6.67224	NA		0.891713	0	0	0	1.5999	NA		7.23671	0	1.11326	0	2.54272	NA		2.21336	0	0.522735	0	1.83607	NA
AAAAGTTTATGTTGACGGGGAA	23H-RNA	TC5	13.8564	13.1224	0	0	7.53469	0.000373789		0	0	0	0	NA	NA		0	0	0	0	NA	NA		0	0	1.10668	0	-1.43789	NA		63.0627	18.3848	0	0	8.13441	5.47576e-06		0	0	0	0	NA	NA
AAATTGTCGGCCGCCGTGGAAA	23H-RNA	Unknown_hairpin_RE2	13.8564	3.28059	0	0	6.93862	0.00533175		0	0	0	0	NA	NA		5.02973	0	0	0	6.49962	NA		0	0	0	0	NA	NA		0	0	0	0	NA	NA		0	0	0	0	NA	NA
AACGTGTCGCTTCGTCATCTGA	23H-RNA	F55A4.9, rncs-1	13.8564	19.6835	0	0.346508	6.40171	0.00154659		0	0	0	0.137578	4.75198	NA		0	0	0	0	NA	NA		0	0	0	0	NA	NA		0	0	0	0	NA	NA		0	0	0	0	NA	NA
AAGAATCCATTGTCCAGCTCC	23H-RNA	F55A4.9, rncs-1	13.8564	3.28059	0	0	6.93862	0.00533175		0	0	0	0	NA	NA		0	0	0	0	NA	NA		0	0	0	0	NA	NA		0	0	0	0	NA	NA		0	0	0	0	NA	NA
ACGACGACGATGGCTGCGGCGAG	23H-RNA	Y57G11C.1145_hairpin	13.8564	16.403	0	0	7.68763	0.000186536		0	0	0	0	NA	NA		0	0	0	0	NA	NA		0	0	0	0	NA	NA		0	0	0	0	NA	NA		0	0	0	0	NA	NA
ACGATGGCTGCGGCGAGGATGAT	23H-RNA	Y57G11C.1145_hairpin	13.8564	19.6835	0	0	7.82591	0.000100394		0	0	0	0	NA	NA		0	0	0	0	NA	NA		0	0	0	0	NA	NA		0	0	0	0	NA	NA		0	0	0	0	NA	NA
AGCAAGAGGAAGAGAAACAAAAG	23H-RNA	F19B2.5	13.8564	6.56118	0	0	7.16764	0.00194457		0	0	0	0.137578	4.75198	NA		0	0	0	0.189386	3.53881	NA		0	0	0	0	NA	NA		0	0	0	0	NA	NA		0	0	0	0	NA	NA
AGGCACATTTTAAGTCGGTAGGC	23H-RNA	gmps-1, M106.4	13.8564	13.1224	0	0	7.53469	0.000373789		0	0	0	0	NA	NA		0	0	0	0	NA	NA		0	0	0	0	NA	NA		0	0	0	0	NA	NA		0	0	0	0	NA	NA
ATAACGAGACCGCTGAAAAAGT	23H-RNA	PAL5A	13.8564	3.28059	0	0.346508	5.52759	0.0297205		0	0	0	0	NA	NA		0	0	0	0	NA	NA		0	0	0	0	NA	NA		2.06763	1.41421	0	0	3.57948	NA		0	0	0	0.910207	-0.728152	NA
ATGATGGCGTGGAAGAAGTTGA	23H-RNA	Y57G11C.1145_hairpin	13.8564	16.403	0	0.346508	6.26472	0.00248088		0	0	0.0819556	0.137578	3.99304	NA		0	6.66725	0	0	6.67224	NA		0	0	0	0	NA	NA		6.20289	0	0	0	4.4331	NA		0	0	0	0	NA	NA
ATGTATGGAGGACGAACACAACC	23H-RNA	C36A4.14	13.8564	0	0	0	6.65571	0.0205256		10.3577	8.61648	0	0	8.91439	3.39448e-05		5.02973	20.0017	0	0	8.61459	0.00016435		0	0	0	0	NA	NA		0	0	0	0	NA	NA		0	0	0.522735	0.910207	-1.47208	NA
ATGTTTCTGAGATGTCTTCACA	23H-RNA	F43E2.6	13.8564	9.84177	0	0	7.36325	0.000812573		0	0	0.0819556	0.137578	3.99304	NA		0	0	0	0	NA	NA		0	0	1.10668	0.735703	-2.24113	NA		0	0	0	0	NA	NA		0	0	0	0	NA	NA
ATTTTGGGGGGCAGAAATCGGAA	23H-RNA	PAL8C	13.8564	6.56118	0	0	7.16764	0.00194457		0	0	0	0	NA	NA		0	0	0	0	NA	NA		0	0	0	0	NA	NA		0	0	0	0	NA	NA		0	0	0	0	NA	NA
CACGATCAGAAGGGATGTCACT	23H-RNA	E01G4.7	13.8564	9.84177	0	0.346508	5.94434	0.00756479		0	17.233	0	0	8.79786	0.164902		0	0	0	0	NA	NA		0	0	2.21336	0	-2.481	NA		3.10145	5.65685	0	0	4.89375	NA		2.21336	0	0	0	3.16472	NA
CACGGCAACTCGGTCCAAAACC	23H-RNA	PALNN1	13.8564	6.56118	0	0	7.16764	0.00194457		10.3577	8.61648	0.0819556	0	7.50737	0.000374291		5.02973	0	0	0	6.49962	NA		0	0	0	0	NA	NA		0	0	0	0	NA	NA		0	0	0	0	NA	NA
CATCATCCTCGCCGCAGCCATC	23H-RNA	Y57G11C.1145_hairpin	13.8564	16.403	0	0	7.68763	0.000186536		0	0	0	0	NA	NA		0	0	0	0	NA	NA		0	0	0	0	NA	NA		0	1.41421	0	0	2.21349	NA		0	0	0	0	NA	NA
CCACGGCGGCCGACAATTTCCG	23H-RNA	Unknown_hairpin_RE2	13.8564	16.403	0	0	7.68763	0.000186536		0	0	0	0	NA	NA		0	0	0	0	NA	NA		0	0	0	0	NA	NA		0	0	0	0	NA	NA		0	0	0	0	NA	NA
CCGCGCGCCGCTATGTTTAACTC	23H-RNA	PALTA3	13.8564	0	0	0	6.65571	0.0205256		0	0	0	0	NA	NA		0	0	0	0	NA	NA		0	0	0	0	NA	NA		0	0	0	0	NA	NA		0	0	0	0	NA	NA
CGATGTTTCTGAGATGTCTTC	23H-RNA	F43E2.6	13.8564	6.56118	0	0	7.16764	0.00194457		0	0	0	0	NA	NA		0	0	0	0	NA	NA		0	0	0	0	NA	NA		0	0	0	0	NA	NA		0	0	0	0	NA	NA
CGCGCCGCTATGTTTAACTCGC	23H-RNA	PALTA3	13.8564	26.2447	0	0	8.06863	3.34224e-05		0	0	0	0	NA	NA		0	0	0	0	NA	NA		0	0	0	0	NA	NA		0	0	0	0	NA	NA		0	0	0	0	NA	NA
CGTAGGATGTCGGCGGCCTGATA	23H-RNA	PALTA3	13.8564	13.1224	0	0	7.53469	0.000373789		0	0	0	0	NA	NA		0	0	0	0	NA	NA		0	0	0	0	NA	NA		0	0	0	0	NA	NA		0	0	0	0	NA	NA
CTCTCTCTTTCAGCTCAATGCC	23H-RNA	F55A4.9, rncs-1	13.8564	6.56118	0	0	7.16764	0.00194457		0	0	0	0	NA	NA		0	0	0	0.189386	3.53881	NA		0	0	0	0	NA	NA		0	0	0	0	NA	NA		0	0	0	0	NA	NA
CTCTTCGAGCGCGTCTTCTTGC	23H-RNA	ChrIII_hairpin1	13.8564	16.403	0	0	7.68763	0.000186536		0	0	0	0	NA	NA		0	0	0	0	NA	NA		0	0	0	0	NA	NA		0	0	0	0	NA	NA		0	0	0	0	NA	NA
GGGCATCGAGCTGAAAGAGAGAGC	23H-RNA	F55A4.9, rncs-1	13.8564	32.8059	0	0	8.27738	1.32405e-05		10.3577	0	0.0819556	0	6.53162	NA		0	0	0.14841	0	3.71683	NA		0	0	0	0	NA	NA		0	0	0	0	NA	NA		0	0	0	0	NA	NA
TCCGCGCGTCGCTATGTTTAACT	23H-RNA	PALTA3	13.8564	26.2447	0	0.346508	6.64265	0.000651731		0	0	0	0	NA	NA		5.02973	0	0	0.189386	5.01117	NA		0	0	0	0	NA	NA		0	0	0	0	NA	NA		0	0	0	0	NA	NA
TCCTCATCTCTGATCTTTTCCA	23H-RNA	F55A4.9, rncs-1	13.8564	6.56118	0	0	7.16764	0.00194457		0	0	0.0819556	0	5.1312	NA		0	0	0	0	NA	NA		0	0	0	0	NA	NA		0	0	0	0	NA	NA		0	0	0	0	NA	NA
TCTCTTCAGCTGACTACACTCT	23H-RNA	rft-2, Y47D7A.14_IR, Y47D7A.14_IR_element	13.8564	3.28059	0	0	6.93862	0.00533175		0	0	0	0	NA	NA		0	0	0	0	NA	NA		0	0	0	0	NA	NA		1.03382	0	0	0	1.98461	NA		0	0	0	0	NA	NA
TGAAATCGTGGGCGGGGCTTAAA	23H-RNA	mir-5550_RE	13.8564	19.6835	0	0	7.82591	0.000100394		0	0	0	0	NA	NA		0	0	0	0	NA	NA		0	0	0	0	NA	NA		0	1.41421	0	0	2.21349	NA		0	0	0	0	NA	NA
TGGCTGCGGCGAGGATGATGTG	23H-RNA	Y57G11C.1145_hairpin	13.8564	3.28059	0	0	6.93862	0.00533175		0	0	0	0	NA	NA		0	0	0	0	NA	NA		0	0	0	0	NA	NA		0	0	0	0	NA	NA		0	0	0	0	NA	NA
TTACAGTACTCCTGAAAGGCACA	23H-RNA	B0303.7	13.8564	19.6835	0	0	7.82591	0.000100394		0	0	0	0	NA	NA		0	0	0	0	NA	NA		0	0	0	0	NA	NA		0	0	0	0	NA	NA		0	0	0	0	NA	NA
TTTTCCCATCCAACTGACTGA	23H-RNA	W04B5.8	13.8564	9.84177	0.453323	0.346508	4.92634	0.00854602		10.3577	0	0.0819556	0.137578	5.50629	NA		0	0	0	0	NA	NA		0	1.24467	0	0	1.84356	NA		0	0	0.556632	0	-0.70837	NA		1.10668	0	0	0	2.36895	NA
AAAGAATCCATTGTCCAGCTCCA	23H-RNA	F55A4.9, rncs-1	12.1244	9.84177	0	0	7.24665	0.00126503		0	0	0	0	NA	NA		0	0	0	0	NA	NA		0	0	0	0	NA	NA		0	0	0	0	NA	NA		0	0	0	0	NA	NA
AAATTGTCGGCCGCTGTGGAAAC	23H-RNA	ChrV_unknown_hairpin1	12.1244	13.1224	0	0	7.43143	0.000567698		0	0	0	0	NA	NA		0	0	0	0	NA	NA		0	0	0	0	NA	NA		0	0	0	0	NA	NA		0	0	0	0	NA	NA
AACGAGACCGCTGAAAAAGTTT	23H-RNA	PAL5A	12.1244	9.84177	0	0	7.24665	0.00126503		0	0	0	0	NA	NA		0	13.3345	0	0	7.71683	NA		0	0	0	0	NA	NA		0	0	0.556632	0	-0.70837	NA		0	0	0	0	NA	NA
AATCGGAAACTCAAAGACCACAC	23H-RNA	Y17D7C.3	12.1244	6.56118	0	0	7.03382	0.00307244		0	0	0	0	NA	NA		0	0	0	0.189386	3.53881	NA		0	0	0	0	NA	NA		0	0	0	0	NA	NA		0	0	0	0	NA	NA
ACGACGATGGCTGCGGCGAGGA	23H-RNA	Y57G11C.1145_hairpin	12.1244	3.28059	0	0	6.78149	0.00862885		0	0	0	0	NA	NA		0	0	0	0	NA	NA		0	0	0	0	NA	NA		0	0	0	0	NA	NA		0	0	0	0	NA	NA
AGCGACACGTTCTACGAGGGA	23H-RNA	F55A4.9, rncs-1	12.1244	16.403	0	0	7.59506	0.000279918		0	0	0	0	NA	NA		0	0	0	0	NA	NA		0	0	0	0	NA	NA		0	0	0	0	NA	NA		0	0	0	0	NA	NA
ATGATGGCGTGGAAGAAGTTG	23H-RNA	Y57G11C.1145_hairpin	12.1244	13.1224	0	0	7.43143	0.000567698		0	0	0	0	NA	NA		0	0	0	0	NA	NA		0	0	0	0	NA	NA		2.06763	1.41421	0	0	3.57948	NA		1.10668	0	0	0	2.36895	NA
ATGATGTGGATGATGGCGTGGA	23H-RNA	Y57G11C.1145_hairpin	12.1244	16.403	0	0	7.59506	0.000279918		0	0	0	0.275156	3.68651	NA		0	0	0	0	NA	NA		0	0	0	0	NA	NA		6.20289	0	0	0	4.4331	NA		0	0	0.522735	0	-0.322129	NA
ATGATGTGGATGATGGCGTGGAA	23H-RNA	Y57G11C.1145_hairpin	12.1244	3.28059	0	0	6.78149	0.00862885		0	0	0	0	NA	NA		0	0	0	0	NA	NA		0	0	0	0	NA	NA		5.16908	2.82843	0	0	4.78259	NA		0	0	0	0.910207	-0.728152	NA
ATGGCTGCGGCGAGGATGATG	23H-RNA	Y57G11C.1145_hairpin	12.1244	13.1224	0	0	7.43143	0.000567698		0	0	0	0	NA	NA		0	0	0	0	NA	NA		0	0	0	0	NA	NA		0	0	0.556632	0	-0.70837	NA		0	0	0	0	NA	NA
CAGTGGAGTGGATGACGACGACGA	23H-RNA	Y57G11C.1145_hairpin	12.1244	13.1224	0	0	7.43143	0.000567698		0	0	0	0	NA	NA		0	0	0	0	NA	NA		0	0	0	0	NA	NA		0	0	0	0	NA	NA		0	0	0	0	NA	NA
CCATCAGCACCAACACCTCACC	23H-RNA	C36A4.14	12.1244	19.6835	0	0	7.74213	0.000147497		0	0	0	0	NA	NA		0	0	0	0	NA	NA		0	0	0	0	NA	NA		0	0	0	0	NA	NA		0	0	0	0	NA	NA
CCATTTGCCGATGTTTCTGAGA	23H-RNA	F43E2.6	12.1244	19.6835	0	0	7.74213	0.000147497		0	0	0.163911	0	4.36457	NA		5.02973	0	0	0	6.49962	NA		0	0	0	0	NA	NA		0	0	0.556632	0	-0.70837	NA		0	1.75743	0	0	2.70729	NA
CGGCCCTTACCGTTTAATACATGT	23H-RNA	mir-5592	12.1244	19.6835	0	0	7.74213	0.000147497		0	25.8494	0.327822	0.137578	5.79646	5.38042e-05		15.0892	20.0017	0.445231	0.378772	5.38392	5.22471e-06		0	0	1.10668	1.47141	-2.73912	NA		0	1.41421	4.45305	2.27244	-2.43607	NA		0	0	1.04547	0.910207	-1.93267	NA
CGGCGCGCGGAACCCATGAGATG	23H-RNA	PALTA3	12.1244	6.56118	0	0	7.03382	0.00307244		0	0	0	0.137578	4.75198	NA		0	0	0	0	NA	NA		0	0	0	0	NA	NA		0	0	0	0	NA	NA		0	0	0	0	NA	NA
CGGTGTGCTCGAGGGCTTGTCA	23H-RNA	Y37E3.30	12.1244	13.1224	0	0	7.43143	0.000567698		0	0	0	0	NA	NA		0	0	0	0	NA	NA		0	0	0	0	NA	NA		0	0	0	0	NA	NA		61.9742	3.51486	0	0	8.01436	0.0755949
CTCGCCGCAGCCATCGTCGTCG	23H-RNA	Y57G11C.1145_hairpin	12.1244	3.28059	0	0	6.78149	0.00862885		0	0	0	0	NA	NA		0	0	0	0	NA	NA		0	0	0	0	NA	NA		0	0	0	0	NA	NA		0	0	0	0	NA	NA
GACGACGAACGATCGGGATGGA	23H-RNA	ChrX_intergenic1	12.1244	22.9641	0	0	7.87583	8.25556e-05		0	0	0	0	NA	NA		0	0	0	0	NA	NA		0	0	0	0	NA	NA		0	0	1.11326	0	-1.38496	NA		27.667	1.75743	0.522735	0.910207	4.4535	0.0384697
GCCCTTACCGTTTAATACATGTT	23H-RNA	mir-5592	12.1244	22.9641	0	0	7.87583	8.25556e-05		0	0	0.0819556	0	5.1312	NA		5.02973	0	0.14841	0	5.1049	NA		0	0	1.10668	0	-1.43789	NA		0	0	0	0	NA	NA		14.3869	36.9061	0	0	7.64306	0.000567971
GCCGATGTTTCTGAGATGTCTT	23H-RNA	F43E2.6	12.1244	19.6835	1.81329	1.03953	3.46991	0.0119758		0	0	1.22933	1.10062	0.575437	NA		0	0	0.742051	1.13632	0.183603	NA		1.78343	1.24467	1.10668	0	1.63286	NA		1.03382	1.41421	1.66989	2.27244	-0.684987	NA		0	1.75743	5.22735	5.46124	-2.8587	NA
TAACAGGGATGAAGTAACGCCA	23H-RNA	other	12.1244	9.84177	0	0	7.24665	0.00126503		0	0	0	0	NA	NA		0	0	0	0	NA	NA		0	0	0	0	NA	NA		0	0	0.556632	0	-0.70837	NA		0	0	0	0	NA	NA
TAGCGAAAACTACAGTAATTCTT	23H-RNA	CELE1	12.1244	0	0	0	6.46415	0.0339301		0	0	0	0	NA	NA		0	0	0	0	NA	NA		0	0	0	0	NA	NA		0	0	0	0	NA	NA		0	0	0	0	NA	NA
TATCCACGACGGCCGACAATTTCC	23H-RNA	Unknown_hairpin_RE2	12.1244	3.28059	0	0	6.78149	0.00862885		0	0	0	0	NA	NA		0	0	0	0	NA	NA		0	0	0	0	NA	NA		0	0	0	0	NA	NA		0	0	0	0	NA	NA
TCAATAAAAACAATGGACAACT	23H-RNA	Y59H11AR.6	12.1244	0	0.453323	0	4.98124	0.112092		0	0	0	0	NA	NA		0	0	0	0	NA	NA		0	1.24467	0	0	1.84356	NA		0	0	0	0	NA	NA		0	0	0	0	NA	NA
TCATCTCTGATCTTTTCCAAT	23H-RNA	F55A4.9, rncs-1	12.1244	19.6835	0	0	7.74213	0.000147497		0	0	0	0	NA	NA		0	0	0.14841	0	3.71683	NA		0	0	0	0	NA	NA		0	0	0	0	NA	NA		0	0	0	0	NA	NA
TCCGATCTGGCAAGTTAAGCAA	23H-RNA	rrn-4_RE	12.1244	6.56118	0.453323	0	5.56561	0.0212633		0	8.61648	0.0819556	0	6.50802	NA		10.0595	13.3345	0.14841	0.568159	5.07452	0.000828452		0	2.48933	0	2.94281	-0.354849	NA		35.1497	1.41421	26.1617	2.27244	0.357722	0.911588		3.32005	5.2723	0.522735	0.910207	2.61463	NA
TCCGCGCGCCGCTGTGTTTAACT	23H-RNA	other	12.1244	9.84177	0	0	7.24665	0.00126503		0	0	0	0	NA	NA		0	0	0	0	NA	NA		0	0	0	0	NA	NA		0	0	0	0	NA	NA		0	0	0	0	NA	NA
TCCTCATCTCTGATCTTTTCCAA	23H-RNA	F55A4.9, rncs-1	12.1244	6.56118	0	0	7.03382	0.00307244		0	0	0	0	NA	NA		0	0	0	0	NA	NA		0	0	0	0	NA	NA		0	0	0	0	NA	NA		0	0	0	0	NA	NA
TGAGAACCCCAAATCTACGGACC	23H-RNA	TC5A	12.1244	3.28059	0	0	6.78149	0.00862885		0	0	0	0	NA	NA		0	0	0	0	NA	NA		0	0	0	0	NA	NA		0	0	0	0	NA	NA		0	0	0	0	NA	NA
TTTCGAAACCGTGCGGCAGTTG	23H-RNA	DNA-8-1	12.1244	9.84177	0	0	7.24665	0.00126503		0	0	0	0	NA	NA		0	0	0	0	NA	NA		0	0	0	0	NA	NA		1.03382	0	0	0	1.98461	NA		0	0	0	0	NA	NA
TTTTGGACCGAGTTGCCGTGACT	23H-RNA	PALNN1	12.1244	9.84177	0	0	7.24665	0.00126503		0	17.233	0	0.137578	7.42428	0.000735718		0	6.66725	0	0	6.67224	NA		0.891713	0	0	0	1.5999	NA		0	0	0	0	NA	NA		0	1.75743	0	0	2.70729	NA
AAAACCACGAATCCTAACCACT	23H-RNA	tRNA	10.3923	6.56118	0	0	6.88607	0.00505148		0	0	0	0	NA	NA		0	0	0	0	NA	NA		0	0	0	0	NA	NA		2.06763	0	0	0	2.85028	NA		0	0	0	0.910207	-0.728152	NA
AAACCGTGCGGCAGTTGCAGAAA	23H-RNA	DNA-8-1	10.3923	0	0	0	6.24281	0.0570238		0	0	0	0	NA	NA		0	0	0	0	NA	NA		0	0	0	0	NA	NA		0	0	0	0	NA	NA		0	0	0	0	NA	NA
AAATTGTCGGCCGCCGTGGAA	23H-RNA	Unknown_hairpin_RE2	10.3923	13.1224	0	0	7.32016	0.000891449		0	0	0	0	NA	NA		0	0	0	0	NA	NA		0	0	0	0	NA	NA		0	0	0	0	NA	NA		0	0	0	0	NA	NA
AAGCGACACGTTCTACGAGGGA	23H-RNA	F55A4.9, rncs-1	10.3923	13.1224	0	0	7.32016	0.000891449		0	0	0	0	NA	NA		0	0	0	0	NA	NA		0	0	0	0	NA	NA		0	0	0	0	NA	NA		0	0	0	0	NA	NA
AATTCTCTCGTAGAACGTGTCG	23H-RNA	F55A4.9, rncs-1	10.3923	26.2447	0	0	7.92501	7.14506e-05		0	0	0	0	NA	NA		5.02973	0	0	0	6.49962	NA		0	0	0	1.47141	-1.95658	NA		0	0	0	0	NA	NA		0	0	0	0	NA	NA
ACGACGATGGCTGCGGCGAGGAT	23H-RNA	Y57G11C.1145_hairpin	10.3923	6.56118	0	0	6.88607	0.00505148		0	0	0	0	NA	NA		0	0	0	0	NA	NA		0.891713	0	0	0	1.5999	NA		0	0	0	0	NA	NA		0	0	0	0	NA	NA
ACTTCTTCCACGCCATCATCC	23H-RNA	Y57G11C.1145_hairpin	10.3923	9.84177	0	0	7.11965	0.00201556		0	0	0	0	NA	NA		0	0	0	0	NA	NA		0	0	0	0	NA	NA		0	0	0	0	NA	NA		0	0	0	0	NA	NA
ATCGTCGTCGTCATCCACTCCACC	23H-RNA	Y57G11C.1145_hairpin	10.3923	3.28059	0	0	6.60481	0.0145514		0	0	0	0	NA	NA		0	0	0	0	NA	NA		0	0	0	0	NA	NA		0	0	0	0	NA	NA		0	0	0	0	NA	NA
ATGACGACGACGATGGCTGCGG	23H-RNA	Y57G11C.1145_hairpin	10.3923	22.9641	0	0	7.79532	0.000123466		0	8.61648	0	0	7.88001	NA		0	0	0	0	NA	NA		0	0	0	0	NA	NA		1.03382	0	0	0	1.98461	NA		0	0	0	0.910207	-0.728152	NA
CAATGGAGCGGTGTAAACTTTT	23H-RNA	E01G4.7	10.3923	22.9641	0	0	7.79532	0.000123466		0	0	0	0	NA	NA		5.02973	0	0	0	6.49962	NA		0	0	0	0	NA	NA		0	0	0	0	NA	NA		14.3869	7.02973	0	0	6.41367	0.0129854
CAATGGAGCGGTGTAAACTTTTC	23H-RNA	E01G4.7	10.3923	39.3671	0	0	8.35481	1.17427e-05		0	0	0	0	NA	NA		0	0	0	0	NA	NA		0	0	0	0	NA	NA		0	0	0	0	NA	NA		0	0	0	0	NA	NA
CAATGTGCTCCAGTCCGCTTGGC	23H-RNA	F55A4.9, rncs-1	10.3923	32.8059	0	0	8.15508	2.709e-05		0	0	0	0	NA	NA		0	0	0	0	NA	NA		0	0	0	0.735703	-1.13933	NA		0	0	0	0	NA	NA		0	0	0	0	NA	NA
CAGCGTCGTACGATGAAAGATG	23H-RNA	F52G3.8	10.3923	9.84177	0.453323	0.346508	4.68033	0.0194252		0	0	0.0819556	0	5.1312	NA		0	0	0	0	NA	NA		0	0	0	0	NA	NA		0	0	0	0	NA	NA		0	0	0	0	NA	NA
CAGTGGAGTGGATGACGACGACG	23H-RNA	Y57G11C.1145_hairpin	10.3923	6.56118	0	0	6.88607	0.00505148		0	0	0	0	NA	NA		0	0	0	0	NA	NA		0	0	0	0	NA	NA		0	0	0	0	NA	NA		0	0	0	0	NA	NA
CCGCATTTTTTGTAGATCAAA	23H-RNA	CELE14B	10.3923	13.1224	0	0	7.32016	0.000891449		0	0	0	0	NA	NA		0	0	0	0	NA	NA		0	0	0	0	NA	NA		0	0	0.556632	0	-0.70837	NA		0	0	0	0	NA	NA
CCGCATTTTTTGTAGATCAAACC	23H-RNA	CELE14B	10.3923	0	0	0	6.24281	0.0570238		0	0	0	0	NA	NA		0	0	0	0	NA	NA		0	0	0	0	NA	NA		0	0	0	0	NA	NA		0	0	0	0	NA	NA
CGACGATGGCTGCGGCGAGGATGA	23H-RNA	Y57G11C.1145_hairpin	10.3923	9.84177	0.453323	0	5.65236	0.015656		0	0	0	0	NA	NA		0	0	0	0	NA	NA		0	0	0	0	NA	NA		0	0	0	0	NA	NA		0	0	0	0	NA	NA
CGCGGGTGATGACAGAAACGGG	23H-RNA	dnj-27_element	10.3923	9.84177	0	0	7.11965	0.00201556		0	0	0	0	NA	NA		0	0	0	0	NA	NA		0	0	0	0	NA	NA		0	0	0	0	NA	NA		0	0	0	0	NA	NA
CGGAGTTAAATTTGAATTTTTTA	23H-RNA	Y69A2AR.16_hairpin	10.3923	0	0	0	6.24281	0.0570238		0	0	0	0	NA	NA		0	0	0	0	NA	NA		0	0	0	0	NA	NA		0	0	0	0	NA	NA		0	0	0	0	NA	NA
CGGGAGGAAAGCTGGGATTATCC	23H-RNA	Y37E3.30	10.3923	16.403	0	0	7.49618	0.000432664		0	0	0	0	NA	NA		0	0	0	0	NA	NA		0	0	0	0	NA	NA		0	0	0	0	NA	NA		0	0	0	0	NA	NA
CGGGATGATGGATCGGGATGA	23H-RNA	T05E12.10	10.3923	9.84177	0	0	7.11965	0.00201556		0	0	0	0	NA	NA		0	0	0	0	NA	NA		0	0	0	0	NA	NA		0	0	0	0	NA	NA		167.109	36.9061	0	0	9.65276	0.00110005
CGGGATGATGGATCGGGATGAA	23H-RNA	T05E12.10	10.3923	9.84177	0	0	7.11965	0.00201556		0	0	0	0	NA	NA		0	0	0	0	NA	NA		0	0	0	0.735703	-1.13933	NA		0	0	0	0	NA	NA		104.028	26.3615	0.522735	0	7.61804	9.35636e-05
CGTCGTCGTCATCCACTCCACC	23H-RNA	Y57G11C.1145_hairpin	10.3923	13.1224	0	0	7.32016	0.000891449		20.7154	8.61648	0.0819556	0.275156	6.48187	1.0069e-05		0	0	0	0	NA	NA		0	1.24467	0	0	1.84356	NA		0	0	0	1.13622	-1.23112	NA		0	0	0	0	NA	NA
CTCCTCGGTCTTGACGAAATCCC	23H-RNA	C36A4.14	10.3923	22.9641	0	0	7.79532	0.000123466		10.3577	0	0	0	8.01412	NA		0	0	0	0.189386	3.53881	NA		0	0	0	0	NA	NA		0	0	0	0	NA	NA		0	0	0	0.910207	-0.728152	NA
CTCGTAGAACGTGTCGCTTCGTC	23H-RNA	F55A4.9, rncs-1	10.3923	26.2447	0	0	7.92501	7.14506e-05		0	0	0	0	NA	NA		0	0	0	0	NA	NA		0	0	0	0	NA	NA		0	0	0	0	NA	NA		0	0	0	0	NA	NA
GAAGGCGCGCTCGAAGAGCCGAG	23H-RNA	ChrIII_hairpin1	10.3923	9.84177	0	0	7.11965	0.00201556		0	0	0	0	NA	NA		0	0	0	0	NA	NA		0	0	0	0	NA	NA		0	0	0	0	NA	NA		0	0	0	0	NA	NA
GGAGGGATGCGAAATAAATATTTT	23H-RNA	Y57G11C.36, Y57G11C.51	10.3923	3.28059	0	0	6.60481	0.0145514		0	0	0	0	NA	NA		0	0	0	0	NA	NA		0	0	0	0.735703	-1.13933	NA		1.03382	0	0	0	1.98461	NA		3.32005	5.2723	0	0	5.07086	NA
GTGGAGTGGATGACGACGACGA	23H-RNA	Y57G11C.1145_hairpin	10.3923	9.84177	2.71994	2.07905	2.08632	0.265882		0	17.233	0.491734	0.963046	3.71611	0.0223454		0	0	1.03887	0.757545	0.244463	NA		3.56685	2.48933	3.32005	2.94281	-0.032487	0.990914		15.5072	7.07107	4.45305	6.81732	1.05033	0.450167		3.32005	1.75743	2.61368	7.28166	-0.905284	0.790299
TAAACGGTAAGGGCCGGCTGG	23H-RNA	mir-5592, R07C3.18, R07C3.19	10.3923	9.84177	0	0	7.11965	0.00201556		0	0	0	0	NA	NA		0	0	0	0	NA	NA		0	0	0	0	NA	NA		0	0	0	0	NA	NA		0	0	0	0	NA	NA
TCCGTGTCACATCTGTCCGAAAT	23H-RNA	other	10.3923	13.1224	0	0	7.32016	0.000891449		0	0	0	0	NA	NA		0	0	0	0	NA	NA		0	0	0	0	NA	NA		0	0	0	0	NA	NA		0	0	0	0	NA	NA
TCGGGGACCAACCAATATCAGGC	23H-RNA	PALTA3	10.3923	29.5253	0	0	8.0444	4.29916e-05		0	0	0.0819556	0	5.1312	NA		0	0	0	0	NA	NA		0	0	0	0	NA	NA		0	0	0	0	NA	NA		0	0	0	0	NA	NA
TCTTCTCGGCTCTTCGAGCGCGT	23H-RNA	ChrIII_hairpin1	10.3923	9.84177	0	0	7.11965	0.00201556		0	0	0	0	NA	NA		0	0	0	0	NA	NA		0	0	0	0	NA	NA		0	0	0	0	NA	NA		0	0	0	0	NA	NA
TGAAATCGTGGGAGGGGCTTAAA	23H-RNA	Unknown_RE7	10.3923	0	0	0	6.24281	0.0570238		0	0	0	0	NA	NA		0	0	0	0	NA	NA		0	0	0	0	NA	NA		0	0	0	0	NA	NA		0	0	0	0	NA	NA
TGACATCCCTTCTGATCGTGGA	23H-RNA	E01G4.7	10.3923	6.56118	0	0	6.88607	0.00505148		0	0	0	0	NA	NA		0	0	0	0	NA	NA		0	0	0	0	NA	NA		0	0	0	0	NA	NA		0	0	0	0.910207	-0.728152	NA
TGCAAATGAAATCGTGGGAGGGG	23H-RNA	Unknown_RE7	10.3923	19.6835	0	0	7.6533	0.000223411		0	0	0	0	NA	NA		0	0	0	0	NA	NA		0	0	1.10668	0	-1.43789	NA		0	0	0	0	NA	NA		0	0	0	0	NA	NA
TGGTGGAGCTGGACGATGGATT	23H-RNA	F55A4.9, rncs-1	10.3923	16.403	0	0	7.49618	0.000432664		0	0	0	0	NA	NA		0	0	0	0	NA	NA		0	0	0	0	NA	NA		0	0	0	0	NA	NA		0	0	0	0	NA	NA
TGTCCCATATCGGTTTGATCTCC	23H-RNA	dnj-27_element	10.3923	6.56118	0	0	6.88607	0.00505148		0	0	0	0	NA	NA		0	0	0	0	NA	NA		0	0	0	0.735703	-1.13933	NA		0	0	0	0	NA	NA		0	0	0	0	NA	NA
TTCGTTCTTGGTGAAAAAAGTG	23H-RNA	E01G4.7	10.3923	0	0	0	6.24281	0.0570238		0	0	0	0	NA	NA		0	0	0	0	NA	NA		0	0	0	0	NA	NA		0	0	0	0	NA	NA		1.10668	0	0	0	2.36895	NA
TTTCGGGGTACGGTATCTAATA	23H-RNA	ChrIII_hairpin2	10.3923	6.56118	0	0	6.88607	0.00505148		0	0	0	0	NA	NA		0	0	0	0	NA	NA		0	0	0	0	NA	NA		0	0	0	0	NA	NA		0	0	0	0	NA	NA
TTTCTGAGATGTCTTCACAAT	23H-RNA	F43E2.6	10.3923	13.1224	0	0	7.32016	0.000891449		0	0	0	0.137578	4.75198	NA		0	0	0	0	NA	NA		0	0	0	0	NA	NA		0	0	0	0	NA	NA		0	0	0	0	NA	NA
TTTCTGAGATGTCTTCACAATTCT	23H-RNA	F43E2.6	10.3923	6.56118	0	0	6.88607	0.00505148		0	0	0.245867	0	3.792	NA		10.0595	0	0	0	7.39502	NA		0	0	0	0	NA	NA		0	0	0	0	NA	NA		0	0	0	0	NA	NA
TTTGATCTACAAAAAATGCGGG	23H-RNA	CELE14B	10.3923	3.28059	0	0	6.60481	0.0145514		0	0	0	0	NA	NA		15.0892	0	0	0	7.97265	NA		0	0	0	0	NA	NA		0	0	0	0	NA	NA		0	0	0	0	NA	NA
TTTTTCAGCGGTCTCGTTATG	23H-RNA	PAL5A	10.3923	9.84177	0	0	7.11965	0.00201556		0	0	0	0	NA	NA		0	0	0	0	NA	NA		0	0	0	0	NA	NA		0	0	0	0	NA	NA		0	0	0	0	NA	NA
AAAGTAAATGCGTTCGGGGGGAA	23H-RNA	Y57G11B.t1	8.66025	0	0	0	5.98086	0.0978728		0	0	0	0	NA	NA		0	0	0	0	NA	NA		0	0	0	0	NA	NA		3.10145	0	0	0	3.43459	NA		0	0	0	0	NA	NA
AACTTAAAACCAACAATGAACA	23H-RNA	Y36E3A.2	8.66025	6.56118	0	0	6.72117	0.00849979		0	0	0	0	NA	NA		0	0	0	0	NA	NA		0	0	0	0	NA	NA		0	0	0	0	NA	NA		3.32005	1.75743	0	0	4.33687	NA
ACTGCCGCACGGTTTCGAAACT	23H-RNA	DNA-8-1	8.66025	16.403	0.453323	0	5.92545	0.00702598		10.3577	0	0.245867	0	5.07638	NA		5.02973	0	0.14841	0	5.1049	NA		0	0	0	0	NA	NA		0	0	0	0	NA	NA		0	0	0.522735	0	-0.322129	NA
AGACGCAGGGCTGGTCGCGATG	23H-RNA	Y57G11C.51	8.66025	6.56118	0	0	6.72117	0.00849979		0	0	0	0	NA	NA		0	0	0	0	NA	NA		0	0	0	0	NA	NA		0	0	0	0	NA	NA		4.42673	7.02973	0	0	5.48605	NA
AGAGGTCCAAGTAAGATGATA	23H-RNA	F39E9.7	8.66025	3.28059	0	0	6.40303	0.0250385		0	0	0	0	NA	NA		0	0	0	0	NA	NA		0	0	0	0.735703	-1.13933	NA		0	0	0	0	NA	NA		0	1.75743	0.522735	0	1.34235	NA
AGCCGGCCCTTACCGTTTAATAC	23H-RNA	mir-5592	8.66025	6.56118	0	0	6.72117	0.00849979		0	0	0.0819556	0	5.1312	NA		0	0	0	0.189386	3.53881	NA		0	0	0	0.735703	-1.13933	NA		0	0	0.556632	0	-0.70837	NA		0	0	0.522735	0	-0.322129	NA
ATAGAGCGAGAATTAACAAGA	23H-RNA	DNA-8-1	8.66025	3.28059	0	0	6.40303	0.0250385		0	0	0	0	NA	NA		0	0	0	0	NA	NA		0	0	0	0	NA	NA		0	0	0	0	NA	NA		0	0	0	0	NA	NA
ATCCCCCCTCCTGTGGAAGTAGA	23H-RNA	C36A4.14	8.66025	9.84177	2.26662	1.03953	2.49646	0.2047		0	0	1.14738	0.963046	0.717394	NA		0	0	1.18728	0.757545	0.129385	NA		0	0	4.42673	5.14992	-4.62966	0.0981483		1.03382	0	2.22653	7.95354	-3.07484	NA		0	0	0.522735	0.910207	-1.47208	NA
ATTCCACTTGGGGTAAATTCGCC	23H-RNA	C36A4.14	8.66025	3.28059	0	0	6.40303	0.0250385		0	0	0.0819556	0	5.1312	NA		0	0	0	0	NA	NA		0	0	0	0	NA	NA		0	0	0	0	NA	NA		0	0	0	0	NA	NA
CACGGAGTTAAATTTGAATTTT	23H-RNA	Y69A2AR.16_hairpin	8.66025	6.56118	0	0	6.72117	0.00849979		0	0	0	0	NA	NA		0	0	0	0	NA	NA		0	0	0	0	NA	NA		1.03382	0	0	0	1.98461	NA		0	0	0	0	NA	NA
CAGCGAATCGCTCTGCCCACTTT	23H-RNA	Y116A8C.27	8.66025	13.1224	0	0	7.19958	0.00145146		0	0	0	0	NA	NA		0	0	0	0	NA	NA		0	0	0	0	NA	NA		0	0	0	0	NA	NA		0	0	0	0	NA	NA
CATAACGAGACCGCTGAAAAAGT	23H-RNA	PAL5A	8.66025	9.84177	0	0	6.98025	0.00331745		0	0	0	0	NA	NA		0	0	0	0	NA	NA		0	0	0	0	NA	NA		0	0	0	0	NA	NA		0	0	0	0	NA	NA
CCCTTACCGTTTAATACATGTT	23H-RNA	mir-5592	8.66025	16.403	0	0	7.39014	0.00068271		0	0	0	0	NA	NA		0	6.66725	0	0	6.67224	NA		0	0	0	0	NA	NA		0	0	0	0	NA	NA		0	0	0	0	NA	NA
CGGAGAAATGACGAGAAATGC	23H-RNA	K07C5.13	8.66025	6.56118	0	0	6.72117	0.00849979		0	0	0	0	NA	NA		5.02973	0	0.14841	0	5.1049	NA		0	0	0	0.735703	-1.13933	NA		0	0	0.556632	0	-0.70837	NA		0	0	0.522735	0	-0.322129	NA
CGGAGTTAAATTTGAATTTTTT	23H-RNA	Y69A2AR.16_hairpin	8.66025	3.28059	0	0	6.40303	0.0250385		0	0	0	0	NA	NA		0	0	0	0	NA	NA		0	0	0	0	NA	NA		1.03382	0	0.556632	0	0.670767	NA		0	0	0	0	NA	NA
CGGCGAGGATGATGTGGATGATG	23H-RNA	Y57G11C.1145_hairpin	8.66025	9.84177	0	0	6.98025	0.00331745		0	0	0	0	NA	NA		0	0	0	0	NA	NA		0	0	0	0	NA	NA		0	0	0	0	NA	NA		0	0	0	0	NA	NA
CTAAATACTGGAGCAGCGCAACC	23H-RNA	F52G3.8	8.66025	6.56118	0	0	6.72117	0.00849979		0	0	0	0	NA	NA		0	0	0	0	NA	NA		0	0	0	0	NA	NA		0	0	0	0	NA	NA		0	0	0	0	NA	NA
CTAGTCAATTCTCTCGTAGAACG	23H-RNA	F55A4.9, rncs-1	8.66025	16.403	0	0	7.39014	0.00068271		0	0	0	0	NA	NA		0	0	0	0	NA	NA		0	0	0	0	NA	NA		0	0	0	0	NA	NA		0	0	0	0	NA	NA
GTTTGATCTCCGAGAATTGCGGG	23H-RNA	dnj-27_element	8.66025	3.28059	0	0	6.40303	0.0250385		0	0	0	0	NA	NA		0	0	0	0	NA	NA		0	0	0	0	NA	NA		0	0	0	0	NA	NA		0	0	0	0	NA	NA
TAACAGGGATGAAGTAACGCC	23H-RNA	other	8.66025	6.56118	0	0	6.72117	0.00849979		0	0	0	0	NA	NA		0	0	0	0	NA	NA		0	0	0	0	NA	NA		0	0	0	0	NA	NA		0	0	0	0	NA	NA
TAATTGGAAAAGATTAGAGATG	23H-RNA	F55A4.9, rncs-1	8.66025	13.1224	0	0	7.19958	0.00145146		0	0	0	0	NA	NA		0	0	0	0	NA	NA		0	0	0	0	NA	NA		0	0	0	0	NA	NA		0	0	0	0	NA	NA
TACGAGGGAATTGACTAGTTTCA	23H-RNA	F55A4.9, rncs-1	8.66025	13.1224	0	0	7.19958	0.00145146		0	0	0	0	NA	NA		5.02973	0	0	0	6.49962	NA		0	0	0	0	NA	NA		0	0	0	0	NA	NA		0	0	0	0	NA	NA
TAGAACGTGTCGCTTCGTCATCTG	23H-RNA	F55A4.9, rncs-1	8.66025	9.84177	0	0	6.98025	0.00331745		0	0	0	0	NA	NA		0	0	0	0	NA	NA		0	0	0	0	NA	NA		0	0	0	0	NA	NA		0	0	0	0	NA	NA
TCAATAAAAACAATGGACAACTG	23H-RNA	Y59H11AR.6	8.66025	3.28059	0	0	6.40303	0.0250385		0	0	0	0	NA	NA		0	0	0	0	NA	NA		0	0	0	0	NA	NA		0	0	0	0	NA	NA		0	0	0	0	NA	NA
TCAGAAACATCGGCAAATGGC	23H-RNA	F43E2.6	8.66025	16.403	0	0	7.39014	0.00068271		0	0	0	0	NA	NA		0	0	0	0	NA	NA		0	0	0	0	NA	NA		0	0	0	0	NA	NA		0	0	0	0	NA	NA
TCATCCTCGCCGCAGCCATCGTCG	23H-RNA	Y57G11C.1145_hairpin	8.66025	3.28059	0	0	6.40303	0.0250385		0	0	0	0	NA	NA		0	0	0	0	NA	NA		0	0	0	0	NA	NA		0	0	0	0	NA	NA		0	0	0	0	NA	NA
TCCACGCCATCATCCACATCATCC	23H-RNA	Y57G11C.1145_hairpin	8.66025	9.84177	0	0	6.98025	0.00331745		0	0	0	0	NA	NA		0	0	0.14841	0	3.71683	NA		0	0	0	0	NA	NA		0	0	0	0	NA	NA		0	0	0	0	NA	NA
TCCCGCATTTCTTGTAGATCACA	23H-RNA	H24K24.4, trm-2A	8.66025	13.1224	0	0	7.19958	0.00145146		0	0	0	0	NA	NA		0	0	0	0	NA	NA		0	0	0	0	NA	NA		0	0	0	0	NA	NA		0	0	0.522735	0	-0.322129	NA
TCCGTGTCACATCTGTCCGAA	23H-RNA	PALTTAA3	8.66025	0	0	0	5.98086	0.0978728		0	0	0	0	NA	NA		0	0	0	0	NA	NA		0	0	0	0	NA	NA		0	0	0	0	NA	NA		0	0	0	0	NA	NA
TCGTCGTCGTCATCCACTCCAC	23H-RNA	Y57G11C.1145_hairpin	8.66025	9.84177	0	0.346508	5.56257	0.021819		0	8.61648	0	0	7.88001	NA		0	0	0	0	NA	NA		0	0	0	0	NA	NA		0	0	0	0	NA	NA		0	0	0	0	NA	NA
TCTCGCCGTCCATCGACTTTAA	23H-RNA	PALTTAA1	8.66025	3.28059	0	0	6.40303	0.0250385		0	0	0	0	NA	NA		0	0	0	0	NA	NA		0	0	0	0	NA	NA		0	0	0	0	NA	NA		0	0	0	0	NA	NA
TGGCGTGTACTGCAGAAAACCT	23H-RNA	PALTA3	8.66025	6.56118	0	0	6.72117	0.00849979		0	0	0	0	NA	NA		0	0	0	0	NA	NA		0	0	0	0	NA	NA		0	0	0	0	NA	NA		0	0	0	0	NA	NA
TGTGATTTTGGATTAAACTCA	23H-RNA	Y59H11AR.6	8.66025	22.9641	0	0.346508	6.28585	0.00249698		0	0	0	0	NA	NA		0	0	0	0	NA	NA		0	0	0	0	NA	NA		0	0	0.556632	0	-0.70837	NA		3.32005	1.75743	0	0	4.33687	NA
TGTTTGATACCTGGACTCTTTCC	23H-RNA	E01G4.7	8.66025	16.403	0	0	7.39014	0.00068271		0	0	0	0	NA	NA		0	0	0	0	NA	NA		0	0	0	0	NA	NA		0	0	0	0	NA	NA		0	0	0	0	NA	NA
TTTCCAATGTGCTCCAGTCCGCT	23H-RNA	F55A4.9, rncs-1	8.66025	3.28059	0	0	6.40303	0.0250385		0	0	0	0	NA	NA		0	0	0	0	NA	NA		0	0	0	0	NA	NA		0	0	0	0	NA	NA		0	0	0	0	NA	NA
TTTCGGGGTACGGTATCTAATAG	23H-RNA	ChrIII_hairpin2	8.66025	3.28059	0	0	6.40303	0.0250385		0	0	0	0	NA	NA		0	0	0	0	NA	NA		0	0	0	0	NA	NA		0	0	0	0	NA	NA		0	0	0	0	NA	NA
AAAAGAAGACTGATCTCGGGCG	23H-RNA	Y65A5A.26, Y65A5A.t3, Y7A9D.66, Y7A9D.t3	6.9282	3.28059	0	0	6.16785	0.0446825		0	0	0	0	NA	NA		0	0	0	0	NA	NA		0	0	0	0	NA	NA		10.3382	1.41421	0	0	5.3508	NA		0	0	0	0	NA	NA
AAACCGCCGGAATTTTCAGCC	23H-RNA	other	6.9282	3.28059	0	0	6.16785	0.0446825		0	0	0	0.137578	4.75198	NA		0	0	0.14841	0	3.71683	NA		0	0	0	0	NA	NA		0	0	0.556632	0	-0.70837	NA		0	0	0	0	NA	NA
AAAGTTGATGGACGGCGAGATT	23H-RNA	PALTTAA1	6.9282	3.28059	0	0	6.16785	0.0446825		0	0	0	0	NA	NA		0	0	0	0	NA	NA		0	0	0	0	NA	NA		0	0	0	0	NA	NA		0	0	0	0	NA	NA
AAATTGTCGGCCGCCGTGGAAAA	23H-RNA	other	6.9282	6.56118	0	0	6.53468	0.0149177		0	8.61648	0	0	7.88001	NA		0	0	0	0	NA	NA		0	0	0	0	NA	NA		1.03382	0	0	0	1.98461	NA		0	0	0	0	NA	NA
AACTGCCGCACGGTTTCGAAACT	23H-RNA	DNA-8-1	6.9282	3.28059	0	0	6.16785	0.0446825		0	0	0	0	NA	NA		0	0	0	0	NA	NA		0	0	0	0	NA	NA		0	0	0	0	NA	NA		0	0	0	0	NA	NA
ACCAATTGTACTTTGTAGGAGCC	23H-RNA	Y116A8B.1	6.9282	13.1224	0	0	7.0681	0.00240418		0	0	0	0	NA	NA		0	0	0	0	NA	NA		0	0	0	0	NA	NA		0	0	0	0	NA	NA		0	0	0	0	NA	NA
ACGTGTTCCAGCATTCTTCGAC	23H-RNA	Y37E3.30	6.9282	3.28059	0	0	6.16785	0.0446825		0	0	0	0	NA	NA		5.02973	0	0	0	6.49962	NA		0	0	0	0.735703	-1.13933	NA		0	0	0	0	NA	NA		0	0	0	0.910207	-0.728152	NA
AGTTCAAGTCTCTCGATGCTCG	23H-RNA	F55A4.9, rncs-1	6.9282	3.28059	0	0	6.16785	0.0446825		0	0	0	0	NA	NA		0	0	0	0	NA	NA		0	0	0	0	NA	NA		0	0	0	0	NA	NA		0	0	0	0	NA	NA
ATCCCAGAACTGGAAATCTTCAC	23H-RNA	other	6.9282	6.56118	0.906647	0	3.9944	0.122441		20.7154	8.61648	0.0819556	0.275156	6.48187	1.0069e-05		5.02973	0	0	0	6.49962	NA		0	1.24467	1.10668	0	0.190057	NA		0	0	0	0	NA	NA		0	0	0	0	NA	NA
ATCGACACAAGCGCTACAGTAG	23H-RNA	CELE1	6.9282	6.56118	0	0	6.53468	0.0149177		0	0	0	0	NA	NA		0	0	0	0	NA	NA		0	0	0	0	NA	NA		0	0	0	0	NA	NA		0	0	0	0	NA	NA
ATCGACACAAGCGCTACAGTAGC	23H-RNA	CELE1	6.9282	0	0	0	5.66002	0.16851		0	0	0	0	NA	NA		0	0	0	0	NA	NA		0	0	0	0	NA	NA		0	0	0	0	NA	NA		0	0	0	0	NA	NA
ATCGGTGTGCTCGAGGGCTTGT	23H-RNA	Y37E3.30	6.9282	3.28059	0	0	6.16785	0.0446825		0	0	0.0819556	0	5.1312	NA		5.02973	0	0	0	6.49962	NA		0	0	0	0	NA	NA		0	0	0	0	NA	NA		2.21336	0	0	0	3.16472	NA
ATCGTCGTCGTCATCCACTCCACT	23H-RNA	Y57G11C.1145_hairpin	6.9282	3.28059	0	0	6.16785	0.0446825		0	0	0	0	NA	NA		0	0	0	0	NA	NA		0	0	0	0	NA	NA		0	0	0	0	NA	NA		0	0	0	0	NA	NA
ATTCGGGAATTAGTTGTCGACAC	23H-RNA	T05E12.8	6.9282	3.28059	0	0	6.16785	0.0446825		0	0	0	0	NA	NA		0	0	0	0	NA	NA		0	0	0	0	NA	NA		0	0	0	0	NA	NA		0	0	0	0	NA	NA
CAGCGTGAACTGTCGAGAGTGC	23H-RNA	linc-68, Y49F6A.10	6.9282	19.6835	0	0	7.45813	0.000559296		0	0	0	0	NA	NA		0	0	0	0	NA	NA		0	0	0	0	NA	NA		0	0	0	0	NA	NA		0	0	0.522735	0	-0.322129	NA
CATTTGCCGATGTTTCTGAGA	23H-RNA	F43E2.6	6.9282	0	0.453323	0.693017	2.70245	0.498969		0	0	0.0819556	0.137578	3.99304	NA		0	0	0.445231	0.189386	1.74251	NA		0	0	0	0	NA	NA		0	0	1.11326	0	-1.38496	NA		1.10668	0	0	0.910207	0.644821	NA
CCACGCCATCATCCACATCATCC	23H-RNA	Y57G11C.1145_hairpin	6.9282	3.28059	0	0	6.16785	0.0446825		0	0	0	0	NA	NA		5.02973	0	0	0	6.49962	NA		0	0	0	0	NA	NA		0	0	0	0	NA	NA		0	0	0	0	NA	NA
CCACGGCGGCCGACAATTTCCGA	23H-RNA	Unknown_hairpin_RE2	6.9282	6.56118	0	0	6.53468	0.0149177		0	0	0	0	NA	NA		0	0	0	0	NA	NA		0	0	0	0	NA	NA		0	0	0	0	NA	NA		0	0	0	0	NA	NA
CCGATGTTTCTGAGATGTCTT	23H-RNA	F43E2.6	6.9282	6.56118	0	0	6.53468	0.0149177		0	0	0	0	NA	NA		0	0	0	0	NA	NA		0	0	0	0	NA	NA		0	0	0	0	NA	NA		0	0	0	0	NA	NA
CGCCAAACATGGATCAACTGGA	23H-RNA	ZK402.2, ZK402.3, ZK402.5	6.9282	0	0	0	5.66002	0.16851		0	0	0	0	NA	NA		0	0	0	0	NA	NA		0	0	0	0	NA	NA		0	0	0	0	NA	NA		7.74677	7.02973	0	0	5.86588	0.0396035
CGTGGAAGAAGTTGATGAAGAGG	23H-RNA	Y57G11C.1145_hairpin	6.9282	3.28059	0	0	6.16785	0.0446825		0	0	0	0	NA	NA		0	0	0	0	NA	NA		0	0	0	0	NA	NA		0	0	0	0	NA	NA		0	0	0	0	NA	NA
CGTGTCGCATCTGTCCGAAGTTG	23H-RNA	other, tbc-9, Y45F10A.6	6.9282	3.28059	0	0	6.16785	0.0446825		0	0	0	0.137578	4.75198	NA		0	0	0	0	NA	NA		0	0	0	0	NA	NA		0	0	0	0	NA	NA		0	0	0	0	NA	NA
CTTTTTCAGCGGTCTCGTTATGA	23H-RNA	PAL5A	6.9282	6.56118	0	0	6.53468	0.0149177		0	0	0	0	NA	NA		0	0	0	0	NA	NA		0	0	0	0	NA	NA		0	0	0	0	NA	NA		0	0	0	0	NA	NA
TAAACATAGCGGCGCGCGGAAC	23H-RNA	PALTA3	6.9282	6.56118	0	0	6.53468	0.0149177		0	8.61648	0	0.137578	6.42587	NA		0	0	0	0	NA	NA		0	0	0	0	NA	NA		1.03382	1.41421	0	0	3.05925	NA		0	0	0	0	NA	NA
TACTGTAGCGCTTGTGTCGATTT	23H-RNA	CELE1	6.9282	16.403	0	0	7.27591	0.00112115		0	0	0	0	NA	NA		0	0	0	0	NA	NA		0	0	0	0	NA	NA		0	0	0	0	NA	NA		0	0	0	0	NA	NA
TAGCCTGAGTCTCAACCAAAAC	23H-RNA	hpo-13, Y105E8A.10	6.9282	0	0	0	5.66002	0.16851		0	0	0	0	NA	NA		0	0	0	0	NA	NA		0	0	0	0	NA	NA		0	0	0	0	NA	NA		0	0	0	0	NA	NA
TAGTTTTGATGACTGGATCTACC	23H-RNA	Y116F11A.1	6.9282	13.1224	0	0	7.0681	0.00240418		0	0	0	0	NA	NA		0	0	0	0	NA	NA		0	0	0	0	NA	NA		0	0	0	0	NA	NA		0	0	0	0	NA	NA
TCAGGCCGCCGACATCTCATGGGT	23H-RNA	PALTA3	6.9282	6.56118	0	0	6.53468	0.0149177		0	0	0	0	NA	NA		0	0	0	0	NA	NA		0	0	0	0	NA	NA		0	0	0	1.13622	-1.23112	NA		0	0	0	0	NA	NA
TCATGATTTATTGTTCCCGTAAT	23H-RNA	PALTA4	6.9282	0	0	0	5.66002	0.16851		0	0	0	0	NA	NA		0	0	0	0	NA	NA		0	0	0	0	NA	NA		0	0	0	0	NA	NA		0	0	0	0	NA	NA
TCCACATCATCCTCGCCGCAGCC	23H-RNA	Y57G11C.1145_hairpin	6.9282	13.1224	0	0	7.0681	0.00240418		0	0	0	0	NA	NA		0	0	0	0	NA	NA		0	0	0	0	NA	NA		0	0	0	0	NA	NA		0	0	0	0	NA	NA
TCCTTCGATGTCGGCTCTTCCT	23H-RNA	F31C3.10, F31C3.9, rrn-3.1, rrn-3.56	6.9282	6.56118	2.26662	3.46508	1.23213	0.651443		0	0	2.37671	1.37578	-0.116939	NA		0	6.66725	2.07774	1.3257	0.778874	NA		7.13371	3.734	7.74677	3.67852	-0.0315016	0.989339		113.72	22.6274	94.0707	11.3622	0.367914	0.874707		1.10668	1.75743	3.13641	7.28166	-1.88162	0.554124
TCGACACATTGATCATGCTGATA	23H-RNA	other	6.9282	9.84177	0	0	6.82586	0.00566523		0	0	0	0	NA	NA		0	0	0	0	NA	NA		0	0	0	0	NA	NA		0	0	0	0	NA	NA		0	0	0	0	NA	NA
TCTCGCCGTCCATCGACTTTAAA	23H-RNA	PALTTAA1	6.9282	0	0	0	5.66002	0.16851		0	0	0	0	NA	NA		0	0	0	0	NA	NA		0	0	0	0	NA	NA		0	0	0	0	NA	NA		0	0	0	0	NA	NA
TCTGAGATGTCTTCACAATTCTC	23H-RNA	F43E2.6	6.9282	6.56118	0	0	6.53468	0.0149177		0	0	0	0	NA	NA		0	0	0	0	NA	NA		0	0	0	0	NA	NA		0	0	0	0	NA	NA		0	0	0	0	NA	NA
TCTGCAACTGCCGCACGGTTTT	23H-RNA	DNA-8-1	6.9282	6.56118	0	0	6.53468	0.0149177		0	0	0	0	NA	NA		0	0	0	0	NA	NA		0	0	0	0	NA	NA		0	0	0.556632	0	-0.70837	NA		0	0	0	0	NA	NA
TGTGGGCGGGGCCAATCCGGAAT	23H-RNA	H15N14.4, Y24F12A.3, Y24F12A.4	6.9282	9.84177	0	0	6.82586	0.00566523		0	0	0	0	NA	NA		0	0	0	0	NA	NA		0	0	0	0	NA	NA		0	0	0	0	NA	NA		0	0	0	0	NA	NA
TTCACGGCGGCCGACAATTTCC	23H-RNA	other	6.9282	0	0	0	5.66002	0.16851		0	0	0	0	NA	NA		0	0	0	0	NA	NA		0	0	0	0	NA	NA		0	0	0	0	NA	NA		0	0	0	0	NA	NA
TTCCACGGCGGCCGACAATTTCC	23H-RNA	Unknown_hairpin_RE2	6.9282	0	0	0	5.66002	0.16851		0	0	0	0	NA	NA		0	0	0	0	NA	NA		0	0	0	0	NA	NA		0	0	0	0	NA	NA		0	0	0	0	NA	NA
TTCGAGACTCGTCAGATCTGCAT	23H-RNA	K02E2.6	6.9282	16.403	0	0	7.27591	0.00112115		0	0	0	0	NA	NA		0	0	0	0.189386	3.53881	NA		0	0	1.10668	0	-1.43789	NA		0	0	0	0	NA	NA		0	0	0	0	NA	NA
TTTCGGGGTACGGTATCTAAT	23H-RNA	ChrIII_hairpin2	6.9282	3.28059	0	0	6.16785	0.0446825		0	0	0	0	NA	NA		0	0	0	0	NA	NA		0	0	0	0	NA	NA		0	0	0	0	NA	NA		0	0	0	0	NA	NA
TTTCGTCCATACATTGAGGGAGCC	23H-RNA	F39E9.10	6.9282	0	0	0	5.66002	0.16851		0	0	0	0	NA	NA		0	0	0	0	NA	NA		0	0	0	0	NA	NA		0	0	0	0	NA	NA		0	0	0	0	NA	NA
AAACAACCCTGAACCAGACGTA	23H-RNA	F31C3.11, rrn-2.1, rrn-2.1_element	5.19615	0	0	0	5.24616	NA		0	0	0	0	NA	NA		0	0	0	0	NA	NA		0	0	0	0	NA	NA		0	0	0	0	NA	NA		0	0	0	0	NA	NA
AAATTGTCGGCCGCCGTGAAAAC	23H-RNA	other	5.19615	3.28059	0	0	5.88608	0.0822703		0	0	0	0	NA	NA		0	0	0	0	NA	NA		0	0	0	0	NA	NA		0	0	0	0	NA	NA		0	0	0	0	NA	NA
AACCGGACCCTGCCTCTTCATCA	23H-RNA	Y57G11C.1145_hairpin	5.19615	9.84177	0	0	6.65297	0.0100255		0	0	0	0	NA	NA		0	0	0	0	NA	NA		0	0	0	0	NA	NA		0	0	0	0	NA	NA		0	0	0	0	NA	NA
AAGACATCTCAGAAACATCGG	23H-RNA	F43E2.6	5.19615	6.56118	0	0	6.32017	0.027039		0	0	0	0	NA	NA		0	0	0.14841	0	3.71683	NA		0	0	0	0	NA	NA		1.03382	2.82843	0	0	3.70637	NA		0	0	0	0	NA	NA
AAGACATCTCAGAAACATCGGCAA	23H-RNA	F43E2.6	5.19615	3.28059	0	0	5.88608	0.0822703		0	0	0	0	NA	NA		0	0	0	0	NA	NA		0	0	0	0	NA	NA		0	0	0	0	NA	NA		0	0	0	0	NA	NA
AAGTGCCACCGTGTCTGGTCTCC	23H-RNA	ZK402.3	5.19615	16.403	0	0	7.15238	0.00191632		0	0	0	0	NA	NA		0	0	0	0	NA	NA		0	0	0	0	NA	NA		0	0	0	0	NA	NA		0	0	0	0	NA	NA
AATTCCAAAACTGCTGTTTCCCC	23H-RNA	Y59H11AR.6	5.19615	13.1224	0	0	6.92373	0.00417814		0	0	0	0	NA	NA		0	0	0	0	NA	NA		0	0	0	0	NA	NA		0	0	0	0	NA	NA		0	0	0	0	NA	NA
AATTGTCGGCCGCTGTGGAAACC	23H-RNA	ChrV_unknown_hairpin1	5.19615	6.56118	0	0	6.32017	0.027039		0	0	0	0	NA	NA		0	0	0	0	NA	NA		0	0	0	0	NA	NA		0	0	0	0	NA	NA		0	0	0.522735	0	-0.322129	NA
ACGATGGATTCTTTGGAGCAAC	23H-RNA	F55A4.9, rncs-1	5.19615	6.56118	0	0	6.32017	0.027039		0	0	0	0	NA	NA		0	0	0	0	NA	NA		0	0	0	0	NA	NA		0	0	0	0	NA	NA		0	0	0	0	NA	NA
AGACATCTCAGAAACATCGGCAAA	23H-RNA	F43E2.6	5.19615	0	0	0	5.24616	NA		0	0	0	0	NA	NA		0	0	0	0	NA	NA		0	0	0	0	NA	NA		0	0	0	0	NA	NA		0	0	0	0	NA	NA
AGAGTGACAGACATCCGGGACCT	23H-RNA	Unknown_RE2	5.19615	3.28059	0	0	5.88608	0.0822703		0	0	0	0	NA	NA		0	0	0	0	NA	NA		0	0	0	0	NA	NA		0	0	0	0	NA	NA		0	0	0	0	NA	NA
AGCCAATATCGGACGATGAAGC	23H-RNA	other	5.19615	0	0	0	5.24616	NA		0	0	0	0.137578	4.75198	NA		0	6.66725	0	0	6.67224	NA		0	0	0	0	NA	NA		0	0	0.556632	0	-0.70837	NA		0	0	0	0	NA	NA
AGCGAAAACTACAGTAAGAACT	23H-RNA	PALTA4	5.19615	0	0	0	5.24616	NA		0	0	0	0	NA	NA		15.0892	0	0	0	7.97265	NA		0	0	0	0	NA	NA		0	0	0	0	NA	NA		0	0	0	0	NA	NA
AGCGAAAACTACAGTAATTCTTT	23H-RNA	CELE1	5.19615	3.28059	0	0	5.88608	0.0822703		0	0	0.0819556	0	5.1312	NA		0	0	0	0	NA	NA		0	0	0	0	NA	NA		0	0	0	0	NA	NA		0	0	0	0	NA	NA
ATCCACGACGGCCGACAATTTCC	23H-RNA	Unknown_hairpin_RE2	5.19615	0	0	0	5.24616	NA		0	0	0	0	NA	NA		0	0	0	0	NA	NA		0	0	0	0	NA	NA		0	0	0	0	NA	NA		0	0	0	0	NA	NA
ATTAGATACCGTACCCCGAAAAC	23H-RNA	ChrIII_hairpin2	5.19615	0	0	0	5.24616	NA		0	0	0	0	NA	NA		0	0	0	0	NA	NA		0	0	0	0	NA	NA		0	0	0	0	NA	NA		0	0	0	0	NA	NA
CAAAATACCAGATTGTCCTTCA	23H-RNA	F39E9.29_region	5.19615	3.28059	0	0	5.88608	0.0822703		0	0	0	0	NA	NA		5.02973	0	0	0	6.49962	NA		0	0	0	0	NA	NA		0	0	0	0	NA	NA		23.2403	7.02973	0	0	6.91879	0.00424869
CACGCCATCATCCACATCATCCT	23H-RNA	Y57G11C.1145_hairpin	5.19615	13.1224	0	0.346508	5.50376	0.0258788		0	0	0	0	NA	NA		0	0	0	0	NA	NA		0	0	0	0	NA	NA		0	0	0	0	NA	NA		0	0	0	0	NA	NA
CATAGGAAATAGATCTAGAACTT	23H-RNA	F58A6.9	5.19615	6.56118	0	0	6.32017	0.027039		0	0	0	0	NA	NA		0	0	0	0	NA	NA		0	0	0	0	NA	NA		0	0	0	0	NA	NA		0	0	0	0	NA	NA
CCAAACTGGATTGACGAGCAT	23H-RNA	F55A4.9, rncs-1	5.19615	9.84177	0	0	6.65297	0.0100255		0	0	0	0	NA	NA		0	0	0	0	NA	NA		0	0	0	0	NA	NA		0	0	0	0	NA	NA		0	0	0	0	NA	NA
CCCTTTGTACACACCGCCCGTC	23H-RNA	F31C3.7, F31C3.8, rrn-1.1, rrn-1.2	5.19615	0	0.453323	0	3.73829	NA		0	0	0.327822	0	3.38366	NA		0	0	0.14841	0.189386	2.65873	NA		0	1.24467	1.10668	0.735703	-0.677236	NA		14.4734	1.41421	7.23621	3.40866	0.578162	0.747543		0	0	0.522735	0	-0.322129	NA
CCGTCTAGGTGATCTTTCAACAC	23H-RNA	Y37E3.30	5.19615	0	0	0	5.24616	NA		0	0	0	0	NA	NA		5.02973	0	0	0	6.49962	NA		0	0	0	0	NA	NA		0	0	0	0	NA	NA		0	0	0	0	NA	NA
CCTCAATGTGTGCCTGCTTCT	23H-RNA	Y37E11B.2	5.19615	3.28059	0	0	5.88608	0.0822703		0	0	0	0	NA	NA		0	0	0	0	NA	NA		0	0	0	0	NA	NA		0	0	0	0	NA	NA		0	0	0	0	NA	NA
CGCATTTTTTGTAGATCAAACCG	23H-RNA	CELE14B	5.19615	6.56118	0	0	6.32017	0.027039		0	0	0	0	NA	NA		0	0	0	0	NA	NA		0	0	0	0	NA	NA		0	0	0	0	NA	NA		0	0	0	0	NA	NA
CGGCGGCCGACAATTTCCGAGT	23H-RNA	Unknown_hairpin_RE2	5.19615	6.56118	0	0	6.32017	0.027039		0	0	0	0	NA	NA		0	0	0	0	NA	NA		0	0	0	0	NA	NA		0	0	0	0	NA	NA		0	0	0	0	NA	NA
CGTCGTCGTCATCCACTCCACT	23H-RNA	Y57G11C.1145_hairpin	5.19615	3.28059	0	0	5.88608	0.0822703		0	0	0	0.137578	4.75198	NA		0	0	0.14841	0	3.71683	NA		0	0	0	0	NA	NA		0	0	0	0	NA	NA		0	0	0	0	NA	NA
CTAAGACTGTTTCTGATCACAA	23H-RNA	F43E2.13, F43E2.6, linc-169	5.19615	0	0	0	5.24616	NA		0	0	0	0	NA	NA		0	0	0	0	NA	NA		0	0	0	0	NA	NA		2.06763	0	0	0	2.85028	NA		0	0	0	0	NA	NA
CTGATCTCTCTTCTCGGCTCTT	23H-RNA	ChrIII_hairpin1	5.19615	3.28059	0.453323	0	4.39313	0.216536		0	8.61648	0	0	7.88001	NA		0	0	0	0	NA	NA		0	0	0	0	NA	NA		0	0	0	0	NA	NA		0	0	0	0.910207	-0.728152	NA
CTTAGGTCACTGGTTCGAATCC	23H-RNA	other	5.19615	13.1224	0.906647	1.03953	3.1699	0.109937		0	8.61648	0.573689	0.825468	2.76768	NA		5.02973	6.66725	0.742051	1.3257	2.49474	NA		0.891713	6.22333	0	2.20711	1.56135	0.610858		4.13526	8.48528	6.67958	6.81732	-0.11882	0.9486		0	0	1.04547	4.55104	-3.42845	NA
CTTTTGTTTCTCTTCCTCTTGC	23H-RNA	F19B2.5	5.19615	3.28059	0	0	5.88608	0.0822703		0	0	0	0	NA	NA		0	0	0	0	NA	NA		0	0	0	0	NA	NA		0	0	0	0	NA	NA		0	0	0	0	NA	NA
GATTACGTCCCTGCCCTTTGT	23H-RNA	F31C3.7, F31C3.8, rrn-1.1, rrn-1.2	5.19615	0	0.453323	0.693017	2.29597	NA		0	8.61648	0.819556	1.37578	2.11887	NA		0	0	0.890462	0.946931	0.213729	NA		10.7006	13.6913	5.53341	8.82844	0.742112	0.62191		24.8116	2.82843	29.5015	3.40866	-0.262327	0.86479		0	3.51486	1.04547	0.910207	0.762975	NA
GCCCGGTGTTGTACGTAGGTGG	23H-RNA	T05E12.8	5.19615	0	0	0	5.24616	NA		0	0	0	0	NA	NA		0	0	0	0	NA	NA		0	0	0	0	NA	NA		0	0	0	0	NA	NA		0	0	0	0	NA	NA
GCCGATGTTTCTGAGATGTCTTCA	23H-RNA	F43E2.6	5.19615	0	0	0	5.24616	NA		0	0	0	0	NA	NA		0	0	0	0	NA	NA		0	0	0	0	NA	NA		0	0	0	0	NA	NA		0	0	0	0	NA	NA
GGCCCTTACCGTTTAATACATGT	23H-RNA	mir-5592	5.19615	0	0	0	5.24616	NA		0	17.233	0.245867	0.550312	4.6118	0.00542715		15.0892	20.0017	0.14841	0.378772	6.09838	5.97928e-06		0	0	2.21336	2.20711	-3.5116	NA		0	0	0	2.27244	-2.30452	NA		14.3869	45.6932	0	0	7.86971	0.000323733
GGTGAGACATGGTATCGAGATATG	23H-RNA	Y37E11B.2	5.19615	3.28059	0	0	5.88608	0.0822703		0	17.233	0.0819556	0.275156	5.83468	0.00114035		0	0	0	0	NA	NA		0.891713	0	0	0	1.5999	NA		1.03382	0	0	0	1.98461	NA		28.7737	35.1486	0	0	7.97297	0.000162821
TAGAAGACCACTTCCGCAGACG	23H-RNA	Y37E3.30	5.19615	3.28059	0	0.346508	4.48124	0.205862		0	0	0.0819556	0	5.1312	NA		0	0	0	0	NA	NA		0	0	0	0	NA	NA		0	0	0	2.27244	-2.30452	NA		11.0668	5.2723	0	0	6.02409	0.030055
TCCACGGCGGCCGACAATTTCCG	23H-RNA	Unknown_hairpin_RE2	5.19615	3.28059	0	0	5.88608	0.0822703		0	0	0	0	NA	NA		0	0	0	0	NA	NA		0	0	0	0	NA	NA		0	0	0	0	NA	NA		0	0	0	0	NA	NA
TCCCCGTCAACATAAACTTTTT	23H-RNA	TC5	5.19615	3.28059	0.906647	0	3.32689	0.347483		0	0	0.163911	0.137578	3.52423	NA		0	0	0	0.189386	3.53881	NA		0	1.24467	0	0	1.84356	NA		10.3382	1.41421	0	1.13622	3.80556	NA		0	1.75743	0	0	2.70729	NA
TCCTTCGATGTCGGCTCTTCCTAT	23H-RNA	F31C3.10, F31C3.9, rrn-3.1, rrn-3.56	5.19615	9.84177	0.453323	0.693017	3.65318	0.107088		0	0	1.06542	0.275156	1.36186	NA		0	0	1.18728	0.946931	-0.00367775	NA		1.78343	0	1.10668	2.94281	-1.12384	NA		8.27052	2.82843	6.67958	9.08975	-0.458845	0.785354		3.32005	5.2723	0	1.82041	2.36714	NA
TCGACAACTAATTCCCGAATCTC	23H-RNA	T05E12.8	5.19615	16.403	0	0	7.15238	0.00191632		0	0	0	0	NA	NA		0	0	0	0	NA	NA		0	0	0	0	NA	NA		0	0	0	0	NA	NA		0	0	0	0	NA	NA
TCGGAAACTGAAGCCCCAAAATC	23H-RNA	other	5.19615	3.28059	0	0	5.88608	0.0822703		0	0	0	0.137578	4.75198	NA		0	0	0	0	NA	NA		0	0	0	0	NA	NA		0	0	0	0	NA	NA		0	0	0	0	NA	NA
TCTACAGAGTCTGGAGAATGT	23H-RNA	C36A4.11, K06B9.6	5.19615	6.56118	0	0.346508	4.90727	0.0983979		10.3577	17.233	0	0.137578	8.04941	2.44866e-05		15.0892	20.0017	0	0.568159	6.04322	0.000133345		0.891713	0	0	0	1.5999	NA		0	0	1.11326	1.13622	-2.33766	NA		0	3.51486	0	0	3.75055	NA
TCTCAATGGAAAATTCTGCATG	23H-RNA	F31A9.2	5.19615	0	0	0	5.24616	NA		0	0	0	0	NA	NA		0	6.66725	0	0	6.67224	NA		0	0	0	0	NA	NA		0	0	0.556632	0	-0.70837	NA		1.10668	0	0	0	2.36895	NA
TCTGAGATGTCTTCACAATTC	23H-RNA	F43E2.6	5.19615	6.56118	0.453323	0	4.83551	0.103028		0	8.61648	0.163911	0	5.60499	NA		0	0	0.14841	0	3.71683	NA		0	0	0	0	NA	NA		0	0	0	0	NA	NA		0	0	0	0	NA	NA
TCTGTACGTCCATTTGGCAATA	23H-RNA	Y105C5A.14	5.19615	6.56118	0	0	6.32017	0.027039		0	0	0	0	NA	NA		0	0	0.14841	0	3.71683	NA		0	0	0	0	NA	NA		0	0	0	0	NA	NA		0	0	0	0	NA	NA
TCTTAGAACCCATATATACCCCC	23H-RNA	Y116F11A.1	5.19615	16.403	0	0	7.15238	0.00191632		0	0	0	0	NA	NA		0	0	0	0	NA	NA		0	0	0	0	NA	NA		0	0	0	0	NA	NA		0	0	0	0	NA	NA
TCTTCCTGATGTTCTGATCCTTC	23H-RNA	Unknown_IR1	5.19615	0	0	0	5.24616	NA		0	0	0	0	NA	NA		0	0	0	0	NA	NA		0	0	0	0	NA	NA		0	0	0	0	NA	NA		0	0	0	0	NA	NA
TGAAGACATCTCAGAAACATCGGC	23H-RNA	F43E2.6	5.19615	9.84177	0	0	6.65297	0.0100255		0	0	0	0	NA	NA		0	0	0	0	NA	NA		0	0	0	0.735703	-1.13933	NA		0	0	0	0	NA	NA		0	0	0	0	NA	NA
TGACGACGACGATGGCTGCGGC	23H-RNA	Y57G11C.1145_hairpin	5.19615	3.28059	0	0	5.88608	0.0822703		0	0	0	0	NA	NA		0	0	0	0	NA	NA		0	0	0	0	NA	NA		0	0	0	0	NA	NA		0	0	0	0	NA	NA
TGAGGTGTTGGTGCTGATGGCA	23H-RNA	C36A4.14	5.19615	3.28059	0	0	5.88608	0.0822703		0	0	0	0	NA	NA		0	0	0	0	NA	NA		0	0	0	0	NA	NA		0	0	0	0	NA	NA		0	0	0	0	NA	NA
TGCGGCGAGGATGATGTGGATGA	23H-RNA	Y57G11C.1145_hairpin	5.19615	0	0	0	5.24616	NA		0	0	0	0	NA	NA		0	0	0	0	NA	NA		0	0	0	0	NA	NA		0	0	0	0	NA	NA		0	0	0	0	NA	NA
TGGTCTTTGAGTTTCCGATTTCG	23H-RNA	Y17D7C.3	5.19615	9.84177	0	0	6.65297	0.0100255		0	0	0	0	NA	NA		0	0	0	0	NA	NA		0.891713	0	0	0	1.5999	NA		0	0	0	0	NA	NA		2.21336	0	0	0	3.16472	NA
TTAAACACAGCGGCGCGCGGAAC	23H-RNA	other	5.19615	3.28059	0	0	5.88608	0.0822703		0	0	0	0	NA	NA		5.02973	0	0	0	6.49962	NA		0	0	0	0	NA	NA		0	0	0	0	NA	NA		0	0	0	0	NA	NA
TTAAACATAGCGGCGCGCGGA	23H-RNA	PALTA3	5.19615	19.6835	0	0	7.35046	0.00093234		0	0	0	0	NA	NA		0	0	0	0	NA	NA		0	0	0	0	NA	NA		3.10145	0	0	0	3.43459	NA		0	0	0	0	NA	NA
TTATCATTGCCCGTCGCCTTTA	23H-RNA	C02B8.2, F31A9.4, fbxc-37, fbxc-38	5.19615	3.28059	0	0	5.88608	0.0822703		0	0	0	0.137578	4.75198	NA		0	0	0	0	NA	NA		0	0	0	0	NA	NA		0	0	0	0	NA	NA		1.10668	0	0	0	2.36895	NA
TTGATTGTGTCGGAAAAAGAAA	23H-RNA	K02E2.6	5.19615	13.1224	0	0	6.92373	0.00417814		0	17.233	0.163911	0	6.5551	0.00081657		25.1487	6.66725	0.14841	0	7.63901	0.000157334		0	0	0	0	NA	NA		0	0	0.556632	1.13622	-1.90807	NA		0	0	0	0	NA	NA
TTTAGTGACTCTGGCCGTTCACC	23H-RNA	TTTAGTGACTCTGGCCGTTCACC_repeat	5.19615	22.9641	0.453323	0	6.05921	0.00536203		0	0	0.0819556	0	5.1312	NA		0	6.66725	0.296821	0	4.29005	NA		0	0	1.10668	0.735703	-2.24113	NA		0	0	0	0	NA	NA		0	0	0.522735	0	-0.322129	NA
TTTCACGGCGGCCGACAATTTCC	23H-RNA	other	5.19615	3.28059	0	0	5.88608	0.0822703		0	0	0	0	NA	NA		0	0	0	0	NA	NA		0	0	0	0	NA	NA		0	0	0	0	NA	NA		0	0	0	0	NA	NA
TTTGATCTACCTGTTGAACTTG	23H-RNA	TIR54TA1	5.19615	0	0	0	5.24616	NA		0	0	0	0	NA	NA		0	0	0	0	NA	NA		0	0	0	0	NA	NA		0	0	0	0	NA	NA		0	0	0	0	NA	NA
TTTTTGCTGATCTCTCTTCTCGG	23H-RNA	ChrIII_hairpin1	5.19615	26.2447	0	0	7.68198	0.000273625		0	0	0	0	NA	NA		0	0	0	0	NA	NA		0	0	0	0	NA	NA		0	0	0	0	NA	NA		0	0	0	0	NA	NA
AAAAATTCAAATTTAACTCCGTG	23H-RNA	Y69A2AR.16_hairpin	3.4641	6.56118	0	0	6.06792	0.0511373		0	0	0	0	NA	NA		0	0	0	0	NA	NA		0	0	0	0	NA	NA		0	0	0	0	NA	NA		0	0	0	0	NA	NA
AAAGGATCACGAGGCTCTTCCTG	23H-RNA	Unknown_IR1	3.4641	3.28059	0	0	5.53466	0.152398		0	0	0	0	NA	NA		0	0	0	0	NA	NA		0	0	1.10668	0	-1.43789	NA		0	0	0.556632	0	-0.70837	NA		0	0	0	0	NA	NA
AAATCACCGTCTAATTTTGAGT	23H-RNA	other	3.4641	3.28059	0	0.346508	4.13015	0.312219		0	8.61648	0	0	7.88001	NA		0	0	0	0	NA	NA		0	0	0	0	NA	NA		6.20289	2.82843	0	1.13622	3.40144	NA		0	0	0	0.910207	-0.728152	NA
AACTGCCGCACGGTTTTGAAACT	23H-RNA	DNA-8-1	3.4641	3.28059	0	0	5.53466	0.152398		0	0	0.0819556	0	5.1312	NA		0	0	0	0	NA	NA		0	0	0	0	NA	NA		0	0	0	0	NA	NA		0	0	0	0	NA	NA
AATATTTATTTCGCATCCCTCCC	23H-RNA	Y57G11C.36, Y57G11C.51	3.4641	13.1224	0	0	6.7641	0.00761429		0	0	0	0	NA	NA		0	0	0	0	NA	NA		0	0	0	0	NA	NA		0	0	0	0	NA	NA		0	0	0	0	NA	NA
AATTGTCGGCCGCCGTGGAAAAC	23H-RNA	other	3.4641	6.56118	0	0	6.06792	0.0511373		0	0	0	0	NA	NA		0	0	0	0	NA	NA		0	0	0	0	NA	NA		0	0	0	0	NA	NA		0	0	0	0	NA	NA
ACCACTTCCGCAGACGCTACA	23H-RNA	Y37E3.30	3.4641	3.28059	0	0	5.53466	0.152398		0	0	0	0.137578	4.75198	NA		0	0	0	0	NA	NA		0	0	0	0	NA	NA		0	0	0	0	NA	NA		2.21336	0	0	0	3.16472	NA
ACTTTTTCAGCGGTCTCGTTATG	23H-RNA	PAL5A	3.4641	0	0	0	4.66258	NA		0	0	0	0	NA	NA		0	0	0	0	NA	NA		0	0	0	0	NA	NA		0	0	0	0	NA	NA		0	0	0	0	NA	NA
AGCTAGCTTCACAACAATTGACC	23H-RNA	W03D2.15	3.4641	0	0	0	4.66258	NA		0	0	0	0	NA	NA		0	0	0	0	NA	NA		0	0	0	0	NA	NA		0	0	0	0	NA	NA		0	0	0	0	NA	NA
AGGATCAGAACATCAGGAAGAGC	23H-RNA	Unknown_IR1	3.4641	0	0	0	4.66258	NA		0	0	0	0	NA	NA		0	0	0	0	NA	NA		0	0	0	0	NA	NA		0	0	0	0	NA	NA		0	0	0	0	NA	NA
AGTCGGGTTGCTTGAAAGTGC	23H-RNA	F31C3.9, rrn-3.1	3.4641	0	0.453323	0	3.1425	NA		0	0	0.245867	0.137578	3.17188	NA		0	0	0.296821	0.378772	1.65828	NA		0.891713	0	0	0	1.5999	NA		19.6425	4.24264	26.7183	2.27244	-0.299374	0.846522		1.10668	0	1.04547	0.910207	-0.571868	NA
AGTGGATGACGACGACGATGGC	23H-RNA	Y57G11C.1145_hairpin	3.4641	0	0.453323	0	3.1425	NA		0	0	0	0	NA	NA		0	0	0	0	NA	NA		0	0	0	0	NA	NA		0	0	0	0	NA	NA		0	1.75743	0	0	2.70729	NA
ATATAGTGACTCTGGCCGTTCA	23H-RNA	ATATAGTGACTCTGGCCGTTCA_repeat	3.4641	9.84177	0	0.346508	5.03941	0.077004		0	0	0.0819556	0.550312	2.47596	NA		0	0	0.14841	0.568159	1.57807	NA		1.78343	1.24467	2.21336	0.735703	0.0896696	NA		1.03382	0	0.556632	1.13622	-0.50627	NA		0	1.75743	1.04547	0	0.557726	NA
ATCATCCTCGCCGCAGCCATCGT	23H-RNA	Y57G11C.1145_hairpin	3.4641	6.56118	0	0.346508	4.65469	0.152398		0	0	0	0	NA	NA		0	0	0	0	NA	NA		0	0	0	0	NA	NA		0	0	0.556632	0	-0.70837	NA		0	0	0.522735	0	-0.322129	NA
ATCCTCGCCGCAGCCATCGTCG	23H-RNA	Y57G11C.1145_hairpin	3.4641	3.28059	0	0.346508	4.13015	0.312219		0	0	0	0	NA	NA		0	0	0	0	NA	NA		0	0	0	0	NA	NA		0	0	0	0	NA	NA		0	0	0	0	NA	NA
ATCGGACGAGCTCTTATCCCCT	23H-RNA	T05E12.8	3.4641	0	0	1.03953	1.82203	NA		0	0	0.163911	0.550312	2.29642	NA		0	6.66725	0	0	6.67224	NA		0	0	0	0	NA	NA		0	0	0.556632	3.40866	-3.11607	NA		2.21336	1.75743	1.04547	0	1.81985	NA
ATGATGGCGTGGAAGAAGTTGAT	23H-RNA	Y57G11C.1145_hairpin	3.4641	16.403	0	0	7.01828	0.00338134		0	8.61648	0	0	7.88001	NA		5.02973	0	0.14841	0	5.1049	NA		0	0	0	0	NA	NA		2.06763	0	1.66989	0	0.262947	NA		0	0	0.522735	0.910207	-1.47208	NA
ATGTATTAAACGGTAAGGGCCGGC	23H-RNA	mir-5592	3.4641	3.28059	0	0	5.53466	0.152398		0	0	0	0	NA	NA		0	0	0	0	NA	NA		0	0	0	0	NA	NA		0	0	0	0	NA	NA		0	0	0	0	NA	NA
ATGTGGATGATGGCGTGGAAGAA	23H-RNA	Y57G11C.1145_hairpin	3.4641	3.28059	0	0	5.53466	0.152398		0	0	0	0	NA	NA		0	0	0	0	NA	NA		0	0	0	0	NA	NA		0	0	0	0	NA	NA		2.21336	0	0	0	3.16472	NA
ATTCCACTTGCATCATACGACG	23H-RNA	F52D2.6	3.4641	3.28059	0.453323	0	4.03076	0.325553		0	0	0.0819556	0	5.1312	NA		0	0	0	0	NA	NA		0	0	0	0	NA	NA		0	0	0	0	NA	NA		5.53341	0	0	0	4.48406	NA
ATTGGGTCAGGGAAGTACTTCG	23H-RNA	W05H12.4	3.4641	3.28059	0	0	5.53466	0.152398		0	0	0	0	NA	NA		0	0	0	0	NA	NA		0	0	0	0	NA	NA		0	0	0	0	NA	NA		0	0	0	0	NA	NA
CAAGTTCAACAGGTAGATCAAA	23H-RNA	TIR54TA1	3.4641	0	0	0	4.66258	NA		0	0	0	0	NA	NA		0	0	0.14841	0	3.71683	NA		0	0	0	0	NA	NA		0	0	0	1.13622	-1.23112	NA		0	0	0	0.910207	-0.728152	NA
CATTCCTACGACATGGAGGTCCC	23H-RNA	C40A11.10, mir-8199	3.4641	0	0	0	4.66258	NA		0	0	0	0	NA	NA		0	0	0	0	NA	NA		0	0	0	0	NA	NA		0	0	0	0	NA	NA		0	0	0	0	NA	NA
CCGTGATGGGACAGCCTGACACC	23H-RNA	CELE14B	3.4641	9.84177	0	0	6.45691	0.018627		0	0	0	0	NA	NA		0	0	0	0	NA	NA		0.891713	0	0	0	1.5999	NA		0	0	0	0	NA	NA		0	0	0.522735	0.910207	-1.47208	NA
CCTTTCGGAGTGATAGCGATAAC	23H-RNA	Y116A8B.1	3.4641	16.403	0	0	7.01828	0.00338134		0	0	0	0	NA	NA		0	6.66725	0	0	6.67224	NA		0	0	0	0	NA	NA		0	0	0	0	NA	NA		0	0	0	0	NA	NA
CGACGACGAACGATCGGGATGGA	23H-RNA	ChrX_intergenic1	3.4641	9.84177	0	0	6.45691	0.018627		0	0	0	0	NA	NA		0	0	0	0	NA	NA		0	0	0	0	NA	NA		0	0	0	0	NA	NA		1.10668	0	0	0	2.36895	NA
CGCATTTTTCGTAGATCAAACCG	23H-RNA	CELE14B	3.4641	0	0	0	4.66258	NA		0	0	0	0	NA	NA		0	0	0	0	NA	NA		0	0	0	0	NA	NA		0	0	0	0	NA	NA		0	0	0	0	NA	NA
CGCATTTTTTGTAGATCAAACCC	23H-RNA	CELE14B	3.4641	0	0	0	4.66258	NA		0	0	0	0	NA	NA		0	0	0	0	NA	NA		0	0	0	0	NA	NA		0	0	0	0	NA	NA		0	0	0	0	NA	NA
CGGAAATTCGTTGATTGAGACA	23H-RNA	other	3.4641	0	0	0	4.66258	NA		0	0	0	0	NA	NA		0	0	0	0	NA	NA		0	0	0	0	NA	NA		0	0	0	0	NA	NA		0	0	0	0	NA	NA
CGGAGCTCGGTTGTGTACGACC	23H-RNA	F49B2.3, Y116A8B.1	3.4641	6.56118	0	0	6.06792	0.0511373		0	0	0	0	NA	NA		0	0	0	0	NA	NA		0	0	0	0	NA	NA		0	0	0	0	NA	NA		0	0	0	0	NA	NA
CGGCGGCCGACAATTTCCGAGC	23H-RNA	Unknown_hairpin_RE2	3.4641	3.28059	0	0	5.53466	0.152398		0	0	0	0	NA	NA		0	0	0	0	NA	NA		0	0	0	0	NA	NA		0	0	0	0	NA	NA		0	0	0	0	NA	NA
CTCCAGTCCGCTTGGCCAAACT	23H-RNA	F55A4.9, rncs-1	3.4641	6.56118	0	0	6.06792	0.0511373		0	0	0	0	NA	NA		0	0	0	0	NA	NA		0	0	0	0	NA	NA		0	0	0	0	NA	NA		0	0	0	0	NA	NA
CTCGGCATTCAGAGGCAACTTCT	23H-RNA	npr-34, Y54E2A.1	3.4641	0	0	0	4.66258	NA		0	0	0	0	NA	NA		5.02973	0	0	0	6.49962	NA		0	0	0	0	NA	NA		0	0	0	0	NA	NA		0	0	0	0	NA	NA
CTCTTGCTTCTGTTCCAAATATG	23H-RNA	F19B2.5	3.4641	3.28059	0	0	5.53466	0.152398		0	0	0	0	NA	NA		0	0	0	0	NA	NA		0	0	0	0	NA	NA		0	0	0	0	NA	NA		0	0	0	0	NA	NA
CTGAGGATTTTGAGTGAGGCTCA	23H-RNA	M4.2, puf-4	3.4641	9.84177	0	0	6.45691	0.018627		0	0	0.0819556	0	5.1312	NA		0	0	0	0	NA	NA		0	0	0	0	NA	NA		0	0	0	0	NA	NA		0	0	0	0	NA	NA
CTGTCAATCTATTTTTCGTCTGT	23H-RNA	CTGTCAATCTATTTTTCGTCTGT_Repeat	3.4641	13.1224	0	0	6.7641	0.00761429		0	0	0	0	NA	NA		0	0	0	0	NA	NA		0	0	0	0	NA	NA		0	0	0	0	NA	NA		0	0	0	0	NA	NA
CTTCTTCCACGCCATCATCCAC	23H-RNA	Y57G11C.1145_hairpin	3.4641	3.28059	0	0	5.53466	0.152398		0	0	0	0	NA	NA		0	0	0	0	NA	NA		0	0	0	0	NA	NA		0	0	0	0	NA	NA		0	0	0	0	NA	NA
CTTTCAGCATCGACCACGGCTTT	23H-RNA	F55A4.9, rncs-1	3.4641	3.28059	0	0	5.53466	0.152398		0	0	0	0	NA	NA		0	0	0	0.189386	3.53881	NA		0	0	0	0	NA	NA		0	0	0	0	NA	NA		0	0	0	0	NA	NA
CTTTTTTCACCAAGAACGAAACC	23H-RNA	E01G4.7	3.4641	3.28059	0	0	5.53466	0.152398		20.7154	0	0	0	9.03919	0.15342		0	0	0	0	NA	NA		0	0	0	0	NA	NA		0	0	0	0	NA	NA		0	0	0.522735	0	-0.322129	NA
GACATCTCAGAAACATCGGCAA	23H-RNA	F43E2.6	3.4641	9.84177	0	0	6.45691	0.018627		0	0	0	0	NA	NA		0	0	0.14841	0	3.71683	NA		0	0	0	0	NA	NA		1.03382	0	0.556632	0	0.670767	NA		1.10668	3.51486	0	0	4.1618	NA
GTGAAGACATCTCAGAAACATCG	23H-RNA	F43E2.6	3.4641	0	0.453323	0.346508	2.2516	NA		0	0	0.0819556	0.275156	3.29828	NA		0	0	0	0	NA	NA		0	0	0	0	NA	NA		1.03382	0	0.556632	1.13622	-0.50627	NA		0	0	0	0.910207	-0.728152	NA
GTTCTGTGGGCGGGGCCAATCC	23H-RNA	DNA-8-1	3.4641	0	0	0	4.66258	NA		0	0	0	0	NA	NA		0	0	0	0	NA	NA		0	0	0	0	NA	NA		0	0	0	0	NA	NA		0	0	0	0	NA	NA
TAAAAAATTCAAATTTAACTCCG	23H-RNA	Y69A2AR.16_hairpin	3.4641	6.56118	0	0	6.06792	0.0511373		0	0	0	0	NA	NA		5.02973	0	0	0	6.49962	NA		0	0	0	0	NA	NA		0	0	0	0	NA	NA		0	0	0	0	NA	NA
TAAAGTCCATGGACGGCGAGATT	23H-RNA	other	3.4641	6.56118	0	0	6.06792	0.0511373		0	0	0	0	NA	NA		0	0	0	0	NA	NA		0	0	0	0	NA	NA		0	0	0	0	NA	NA		0	0	0	0	NA	NA
TAACGAGACCGCTGAAAAAGTC	23H-RNA	W09C5.9	3.4641	3.28059	0	0	5.53466	0.152398		0	0	0	0	NA	NA		0	0	0	0	NA	NA		0	0	0	0	NA	NA		0	0	0	0	NA	NA		0	0	0	0	NA	NA
TACATAGATGCCGAGTACAACCC	23H-RNA	E01G4.5	3.4641	13.1224	0	0	6.7641	0.00761429		0	0	0	0	NA	NA		0	0	0	0	NA	NA		0	0	0	0	NA	NA		0	0	0	0	NA	NA		0	0	0	0	NA	NA
TACCGTACCCCGAAAACTAGAA	23H-RNA	ChrIII_hairpin2	3.4641	6.56118	0	0	6.06792	0.0511373		0	8.61648	0	0	7.88001	NA		0	0	0	0	NA	NA		0	0	0	0	NA	NA		0	0	0	0	NA	NA		0	0	0	0	NA	NA
TACGGGAAAAGCAGAGAGGCC	23H-RNA	F39E9.7	3.4641	6.56118	0	0	6.06792	0.0511373		0	0	0	0	NA	NA		0	0	0	0	NA	NA		0	0	0	0	NA	NA		0	0	0	0	NA	NA		13.2802	0	0	0	5.7164	0.453726
TACGGGAAAAGCAGAGAGGCCAC	23H-RNA	F39E9.7	3.4641	0	0	0	4.66258	NA		0	0	0	0	NA	NA		0	0	0	0	NA	NA		0	0	0	0	NA	NA		0	0	0	0	NA	NA		0	0	0	0	NA	NA
TACTGTAGCGCTTGTGTCGATT	23H-RNA	CELE1	3.4641	6.56118	0	0	6.06792	0.0511373		0	0	0	0	NA	NA		0	0	0	0	NA	NA		0	0	0	0	NA	NA		0	0	0	0	NA	NA		0	0	0	0	NA	NA
TATCAGGCCGCCGACATCTCATG	23H-RNA	PALTA3	3.4641	0	0	0	4.66258	NA		0	0	0.0819556	0	5.1312	NA		0	0	0	0	NA	NA		0	0	0	0	NA	NA		0	0	0	0	NA	NA		0	0	0	0	NA	NA
TATTCCTGATGCGGCGCCGGCT	23H-RNA	T05E12.8	3.4641	0	0	0	4.66258	NA		0	8.61648	0	0	7.88001	NA		5.02973	0	0	0	6.49962	NA		0	0	0	0	NA	NA		0	0	0	0	NA	NA		21.027	3.51486	0	0	6.62195	0.0100427
TCAAACATTCGGCAATGGGGTA	23H-RNA	Y37E3.30	3.4641	0	0	0	4.66258	NA		0	0	0	0	NA	NA		0	0	0	0	NA	NA		0	0	0	0	NA	NA		0	0	0	0	NA	NA		5.53341	0	0	0	4.48406	NA
TCACGGAGTTAAATTTGAATT	23H-RNA	Y69A2AR.16_hairpin	3.4641	3.28059	0	0	5.53466	0.152398		0	0	0	0	NA	NA		0	0	0	0	NA	NA		0	0	0	0	NA	NA		0	0	0	0	NA	NA		0	0	0	0	NA	NA
TCACGGCAACTCGGTCCAAAACC	23H-RNA	PALNN1	3.4641	0	0	0	4.66258	NA		0	0	0	0	NA	NA		0	0	0	0	NA	NA		0	0	0	0	NA	NA		0	0	0	0	NA	NA		0	0	0	0	NA	NA
TCACTGTTGCGGATGGTCCAGG	23H-RNA	F57G8.14, F57G8.15, linc-59	3.4641	0	0	0	4.66258	NA		0	0	0	0	NA	NA		0	0	0	0	NA	NA		0	0	0	0	NA	NA		0	0	0	0	NA	NA		0	0	0	0	NA	NA
TCATCAGCTCCATCAACACCA	23H-RNA	C36A4.14	3.4641	3.28059	0	0	5.53466	0.152398		0	0	0	0	NA	NA		0	0	0	0	NA	NA		0	0	0	0	NA	NA		0	0	0	0	NA	NA		0	0	0	0	NA	NA
TCCCACGATTTCATTTGCACTG	23H-RNA	Unknown_RE7	3.4641	3.28059	0	0	5.53466	0.152398		0	0	0	0	NA	NA		0	0	0	0	NA	NA		0	0	0	0	NA	NA		0	0	0	0	NA	NA		0	0	0	0	NA	NA
TCCCGCATTTCTTGTAGATCAAA	23H-RNA	CELE14B	3.4641	6.56118	0	0	6.06792	0.0511373		0	0	0	0	NA	NA		0	0	0	0	NA	NA		0	0	0	0	NA	NA		0	0	0	0	NA	NA		0	0	0	0	NA	NA
TCCCGGATGTCTGTCACTCTCT	23H-RNA	Unknown_RE2	3.4641	6.56118	0	0	6.06792	0.0511373		0	0	0	0	NA	NA		0	0	0	0	NA	NA		0	0	0	0	NA	NA		0	0	0	0	NA	NA		0	0	0	0	NA	NA
TCCGCGCACCGCTATGTTTAACT	23H-RNA	other, Y64G10A.10	3.4641	0	0	0	4.66258	NA		0	0	0	0	NA	NA		0	0	0	0	NA	NA		0	0	0	0	NA	NA		1.03382	0	0	0	1.98461	NA		0	0	0	0	NA	NA
TCCGCGCGCCGCTGCGTTTAACT	23H-RNA	PALTA3	3.4641	0	0	0	4.66258	NA		0	0	0	0	NA	NA		0	0	0	0	NA	NA		0	0	0	0	NA	NA		0	0	0	0	NA	NA		0	0	0	0	NA	NA
TCCTTCGATGTCGGCTCTTCC	23H-RNA	F31C3.10, F31C3.9, rrn-3.1, rrn-3.56	3.4641	0	2.26662	3.81159	-0.617692	0.904374		0	0	1.72107	1.65094	0.0430168	NA		0	6.66725	1.4841	2.27263	0.647374	NA		3.56685	2.48933	4.42673	1.47141	0.0854421	0.978071		46.5217	15.5563	27.2749	21.5882	0.356659	0.700061		2.21336	5.2723	5.75009	5.46124	-0.627821	0.842101
TCGACAACTAATTCCCGAATCT	23H-RNA	T05E12.8	3.4641	0	0	0	4.66258	NA		0	0	0	0	NA	NA		0	0	0	0	NA	NA		0	0	0	0	NA	NA		0	0	0	0	NA	NA		0	0	0	0	NA	NA
TCGCGTAGATCACATGTAGATCA	23H-RNA	pcp-4, Unknown_RE8, Y116F11B.3, Y15E3A.3, Y6B3B.7, Y6B3B.9	3.4641	3.28059	0	0	5.53466	0.152398		0	0	0	0.137578	4.75198	NA		0	0	0	0	NA	NA		0	0	0	0	NA	NA		0	0	0	0	NA	NA		0	0	0	0	NA	NA
TCGGAAATTGTCGGCCGCCGTG	23H-RNA	Unknown_hairpin_RE2	3.4641	3.28059	0	0	5.53466	0.152398		0	0	0	0	NA	NA		0	0	0	0	NA	NA		0	0	0	0	NA	NA		0	0	0	0	NA	NA		0	0	0	0	NA	NA
TCGTATGATGCAAGTGGAATTT	23H-RNA	F52D2.6	3.4641	0	0	0	4.66258	NA		0	0	0	0	NA	NA		0	0	0	0	NA	NA		0	0	0	0	NA	NA		0	0	0	0	NA	NA		0	0	0	0	NA	NA
TCGTTGATTTAAGTAGATTTATG	23H-RNA	Y71F9AL.1_hairpin	3.4641	6.56118	0	0	6.06792	0.0511373		0	0	0	0	NA	NA		5.02973	0	0	0	6.49962	NA		0	0	0	0	NA	NA		0	0	0	0	NA	NA		0	0	0	0	NA	NA
TCTACAGAAGGGACGCCGGAAA	23H-RNA	other	3.4641	6.56118	0	0	6.06792	0.0511373		0	0	0	0	NA	NA		0	0	0	0	NA	NA		0	0	0	0	NA	NA		0	0	0	0	NA	NA		0	0	0	0	NA	NA
TCTTACTGTAGTTTTCGCTAAG	23H-RNA	PALTA4	3.4641	0	0	0	4.66258	NA		0	0	0	0	NA	NA		0	0	0	0	NA	NA		0	0	0	0	NA	NA		0	0	0	0	NA	NA		0	0	0	0	NA	NA
TCTTACTGTAGTTTTCGCTAAGA	23H-RNA	PALTA4	3.4641	3.28059	0	0	5.53466	0.152398		10.3577	0	0	0	8.01412	NA		0	0	0	0	NA	NA		0	0	0	0	NA	NA		0	0	0	0	NA	NA		0	0	0	0	NA	NA
TCTTCTCGGCTCTTCGAGCGCGTC	23H-RNA	ChrIII_hairpin1	3.4641	0	0	0	4.66258	NA		0	0	0	0	NA	NA		0	0	0	0	NA	NA		0	0	0	0	NA	NA		0	0	0	0	NA	NA		0	0	0	0	NA	NA
TGAAAGGATCGGGACGATTAGG	23H-RNA	ChrX_intergenic1	3.4641	13.1224	0	0	6.7641	0.00761429		0	0	0	0	NA	NA		0	0	0	0	NA	NA		0	0	0	0	NA	NA		0	0	0	0	NA	NA		0	0	0	0	NA	NA
TGAAAGGATCGGGACGATTAGGA	23H-RNA	ChrX_intergenic1	3.4641	9.84177	0	0	6.45691	0.018627		0	0	0	0	NA	NA		0	0	0	0	NA	NA		0	0	0	0	NA	NA		0	0	0	0	NA	NA		0	0	0	0	NA	NA
TGAGGTTTTCTGCAGTACACGC	23H-RNA	PALTA3	3.4641	0	0	0	4.66258	NA		0	0	0	0	NA	NA		0	0	0	0	NA	NA		0	0	0	0	NA	NA		0	0	0	0	NA	NA		0	0	0	0	NA	NA
TGCGGCGAGGATGATGTGGATG	23H-RNA	Y57G11C.1145_hairpin	3.4641	9.84177	0	0	6.45691	0.018627		0	0	0	0	NA	NA		0	0	0	0	NA	NA		0	0	0	0	NA	NA		0	0	0	0	NA	NA		0	0	0	0.910207	-0.728152	NA
TGGAGACCCTCACCTACCTGCG	23H-RNA	other, Y116A8B.1	3.4641	3.28059	0	0	5.53466	0.152398		0	0	0	0	NA	NA		0	0	0	0	NA	NA		0	0	0	0	NA	NA		0	0	0	0	NA	NA		0	0	0	0	NA	NA
TGGATGATGGCGTGGAAGAAG	23H-RNA	Y57G11C.1145_hairpin	3.4641	9.84177	0	0	6.45691	0.018627		0	0	0	0	NA	NA		0	0	0	0	NA	NA		0	0	0	0	NA	NA		0	0	0	0	NA	NA		0	0	0	0	NA	NA
TGTTCTGCTCTCTCTTTCAGCT	23H-RNA	F55A4.9, rncs-1	3.4641	6.56118	0	0	6.06792	0.0511373		0	0	0	0	NA	NA		0	0	0	0	NA	NA		0	0	1.10668	0	-1.43789	NA		0	0	0	0	NA	NA		0	0	0	0	NA	NA
TTCAAACATTCGGCAATGGGGTA	23H-RNA	Y37E3.30	3.4641	6.56118	0	0	6.06792	0.0511373		0	0	0	0	NA	NA		0	0	0	0	NA	NA		0	0	0	0	NA	NA		0	0	0	0	NA	NA		1.10668	0	0	0	2.36895	NA
TTCCCTTTATGTCGCACTTGCG	23H-RNA	T05E12.10	3.4641	0	0	0	4.66258	NA		0	0	0	0	NA	NA		0	0	0	0	NA	NA		0	0	0	0	NA	NA		0	0	0	0	NA	NA		2.21336	0	0	0	3.16472	NA
TTCTACAAAAGGGACGCCGGAAA	23H-RNA	mtd-1, other, ZK337.5	3.4641	0	0	0	4.66258	NA		0	0	0	0	NA	NA		0	0	0	0	NA	NA		0	0	0	0	NA	NA		0	0	0	0	NA	NA		0	0	0	0	NA	NA
TTCTACATATCCAAACGAGGAACC	23H-RNA	Y17D7C.3	3.4641	0	0	0	4.66258	NA		0	0	0	0	NA	NA		0	0	0	0	NA	NA		0	0	0	0	NA	NA		0	0	0	0	NA	NA		0	0	0	0	NA	NA
TTCTTACTGTAGTCTTCGCTAAG	23H-RNA	fbxa-16, other, Y73B3A.14	3.4641	6.56118	0	0	6.06792	0.0511373		0	0	0	0.137578	4.75198	NA		5.02973	0	0	0	6.49962	NA		0	0	0	0	NA	NA		0	0	0	0	NA	NA		0	0	0	0	NA	NA
TTCTTACTGTAGTTTTCGCTAAG	23H-RNA	PALTA4	3.4641	3.28059	0	0	5.53466	0.152398		10.3577	0	0	0	8.01412	NA		0	0	0	0	NA	NA		0	0	0	0	NA	NA		0	0	0	0	NA	NA		0	0	0	0	NA	NA
TTGATCTCTATGCGACCCCACA	23H-RNA	T05E12.10	3.4641	3.28059	0	0	5.53466	0.152398		0	0	0	0	NA	NA		0	0	0	0	NA	NA		0	0	0	0	NA	NA		0	0	0	0	NA	NA		12.1735	5.2723	0.522735	0	4.74232	0.0758415
TTGCCTCTGAATGCCGAGTAGG	23H-RNA	other	3.4641	13.1224	0	0	6.7641	0.00761429		0	0	0	0	NA	NA		0	0	0.14841	0	3.71683	NA		0	0	0	0	NA	NA		0	0	0	0	NA	NA		0	0	0	0	NA	NA
TTTCGGACAGATGTGACACGGA	23H-RNA	other	3.4641	9.84177	0	0	6.45691	0.018627		0	0	0	0	NA	NA		0	0	0	0	NA	NA		0	0	0	0	NA	NA		0	0	0	0	NA	NA		0	0	0	0	NA	NA
TTTCTGTCATCACCCGCGGGGC	23H-RNA	dnj-27_element	3.4641	3.28059	0	0	5.53466	0.152398		0	0	0	0	NA	NA		5.02973	0	0	0	6.49962	NA		0	0	0	0	NA	NA		1.03382	0	0	0	1.98461	NA		0	0	0	0	NA	NA
TTTCTGTCATCACCCGCGGGGCC	23H-RNA	dnj-27_element	3.4641	9.84177	0	0	6.45691	0.018627		0	0	0	0	NA	NA		0	0	0	0	NA	NA		0	0	0	0	NA	NA		0	0	0	0	NA	NA		0	0	0	0	NA	NA
TTTGGGGGGCAGAAATCGGAAA	23H-RNA	PAL8C	3.4641	6.56118	0	0	6.06792	0.0511373		0	0	0	0	NA	NA		0	0	0	0	NA	NA		0	0	0	0	NA	NA		0	0	0	0	NA	NA		0	0	0	0	NA	NA
TTTTCTGCAGTACACGCCACGC	23H-RNA	PALTA3	3.4641	0	0	0	4.66258	NA		0	0	0	0	NA	NA		0	0	0	0	NA	NA		0	0	0	0	NA	NA		0	0	0	0	NA	NA		0	0	0	0	NA	NA
AAAATGGACGACGTGCTCGACAG	23H-RNA	C14B1.7	1.73205	0	0	0	3.91281	NA		0	0	0	0	NA	NA		0	0	0	0	NA	NA		0	0	0	0	NA	NA		0	0	0	0	NA	NA		0	0	0	0	NA	NA
AAACAACCCTGAACCAGACGT	23H-RNA	F31C3.11, rrn-2.1, rrn-2.1_element	1.73205	0	0	0	3.91281	NA		0	0	0	0	NA	NA		0	0	0	0	NA	NA		0	0	0	0	NA	NA		0	0	0	0	NA	NA		0	0	0	0	NA	NA
AAACCACGAATCCTAACCACTA	23H-RNA	tRNA	1.73205	0	0	0	3.91281	NA		0	0	0	0	NA	NA		0	0	0	0	NA	NA		0	0	0	0	NA	NA		1.03382	0	0	0	1.98461	NA		0	0	0	0	NA	NA
AAATTCAAATTTAACTCCGTGA	23H-RNA	Y69A2AR.16_hairpin	1.73205	0	0	0	3.91281	NA		10.3577	0	0	0	8.01412	NA		5.02973	0	0	0	6.49962	NA		0	0	0	0	NA	NA		1.03382	2.82843	0	0	3.70637	NA		0	1.75743	0	0	2.70729	NA
AAGACCCTGTTGAGCTTGACTC	23H-RNA	F31C3.9, rrn-3.1	1.73205	3.28059	0.453323	0.346508	2.60907	NA		0	0	0.819556	0.275156	1.65512	NA		0	0	0.742051	0.378772	0.923244	NA		9.80885	1.24467	0	0.735703	3.68893	0.18252		11.372	7.07107	10.0194	1.13622	0.653209	0.695945		0	1.75743	2.09094	1.82041	-1.35362	NA
AATATTTATTTCGCATCCCTCCCC	23H-RNA	Y57G11C.36, Y57G11C.51	1.73205	0	0	0	3.91281	NA		0	0	0	0	NA	NA		0	0	0	0	NA	NA		0	0	0	0	NA	NA		0	0	0	0	NA	NA		0	0	0	0	NA	NA
AATTGTCGGCCGCCGTGGAAAA	23H-RNA	other	1.73205	0	0	0	3.91281	NA		0	0	0	0	NA	NA		0	0	0	0	NA	NA		0	0	0	0	NA	NA		0	0	0	0	NA	NA		0	0	0	0	NA	NA
AATTTTGCCTTTTCCCCGTGAGT	23H-RNA	PALTA3	1.73205	3.28059	0	0	5.06768	NA		0	0	0	0	NA	NA		0	0	0	0	NA	NA		0	0	0	0	NA	NA		0	0	0	0	NA	NA		0	0	0	0	NA	NA
ACATTTTCGGCCAGTGGGGCACA	23H-RNA	other	1.73205	3.28059	0	0	5.06768	NA		0	0	0	0	NA	NA		5.02973	0	0	0	6.49962	NA		0	0	0	0	NA	NA		0	0	0	0	NA	NA		0	0	0	0	NA	NA
ACCGGACCCTGCCTCTTCATC	23H-RNA	Y57G11C.1145_hairpin	1.73205	0	0	0	3.91281	NA		10.3577	8.61648	0	0	8.91439	3.39448e-05		0	0	0	0	NA	NA		0	0	0	0	NA	NA		0	0	0	0	NA	NA		0	0	0	0	NA	NA
ACCGGGTTAGTATTTTCAAGCA	23H-RNA	ZK1236.8	1.73205	3.28059	0	0	5.06768	NA		0	0	0	0	NA	NA		0	0	0	0	NA	NA		0	0	0	0	NA	NA		0	0	0	0	NA	NA		0	0	0	0	NA	NA
ACCGGTACAGAGAGTGTGGATA	23H-RNA	lin-29, other, W03C9.4	1.73205	0	0	0	3.91281	NA		0	0	0	0	NA	NA		0	0	0	0	NA	NA		0	0	0	0	NA	NA		0	0	0	0	NA	NA		0	0	0	0	NA	NA
ACCTACGTACAACACCGGGCTC	23H-RNA	T05E12.8	1.73205	0	0	0	3.91281	NA		0	0	0	0	NA	NA		0	0	0	0	NA	NA		0	0	0	0	NA	NA		0	0	0	0	NA	NA		0	0	0	0	NA	NA
ACCTCCATGTCGTAGGAATGCT	23H-RNA	C40A11.10, mir-8199	1.73205	0	0	0	3.91281	NA		0	0	0	0	NA	NA		0	0	0	0	NA	NA		0	0	0	0	NA	NA		0	0	0	0	NA	NA		0	0	0	0	NA	NA
ACGACGATGGCTGCGGCGAGG	23H-RNA	Y57G11C.1145_hairpin	1.73205	3.28059	0	0	5.06768	NA		0	0	0	0	NA	NA		0	0	0	0	NA	NA		0	0	0	0	NA	NA		0	0	0	0	NA	NA		0	0	0	0	NA	NA
ACTATCTACACTCTCTGTACCGG	23H-RNA	Unknown_RE2	1.73205	0	0	0	3.91281	NA		0	0	0	0	NA	NA		0	0	0	0	NA	NA		0	0	0	0	NA	NA		0	0	0	0	NA	NA		0	0	0	0	NA	NA
ACTCCACCGTAATACAGTTTTCC	23H-RNA	other	1.73205	0	0	0	3.91281	NA		0	0	0	0	NA	NA		0	0	0	0	NA	NA		0	0	0	0	NA	NA		0	0	0	0	NA	NA		0	0	0	0	NA	NA
ACTGCCGCACGGTTTTGAAAC	23H-RNA	DNA-8-1	1.73205	0	0	0	3.91281	NA		0	0	0	0	NA	NA		0	0	0	0	NA	NA		0	0	0	0	NA	NA		0	0	0	0	NA	NA		0	0	0	0	NA	NA
ACTTTTTCAGCGGTCTCGTTATA	23H-RNA	PAL5A	1.73205	3.28059	0	0	5.06768	NA		0	0	0	0	NA	NA		0	0	0	0	NA	NA		0	0	0	0	NA	NA		0	0	0	0	NA	NA		0	0	0	0	NA	NA
AGAGGTCCAAGTAAGATGATAG	23H-RNA	F39E9.7	1.73205	9.84177	0	0	6.23162	0.0371878		0	0	0	0	NA	NA		0	0	0	0	NA	NA		0	0	0	0	NA	NA		0	0	0	0	NA	NA		0	0	0	0	NA	NA
AGAGTGTAGTCAGCTGAAGAGAC	23H-RNA	rft-2, Y47D7A.14_IR, Y47D7A.14_IR_element	1.73205	0	0	0	3.91281	NA		0	0	0	0	NA	NA		0	0	0	0	NA	NA		0	0	0	0	NA	NA		0	0	0	0	NA	NA		0	0	0	0	NA	NA
AGCAGACGCTCATGACCACTT	23H-RNA	Y17D7B.4	1.73205	0	0	0	3.91281	NA		0	0	0	0	NA	NA		0	0	0	0	NA	NA		0	0	0	0	NA	NA		0	0	0	0	NA	NA		0	0	0	0	NA	NA
AGCGAAAACTACAGTAATTCTT	23H-RNA	CELE1	1.73205	0	0	0	3.91281	NA		0	0	0	0.137578	4.75198	NA		0	0	0	0	NA	NA		0	0	0	0	NA	NA		0	0	0	0	NA	NA		0	0	0	0	NA	NA
AGGCACAGTTCTGTGGGCGGGG	23H-RNA	24F12A.4, H15N14.4, H37A05.4, Y24F12A.3	1.73205	0	0	0	3.91281	NA		0	0	0	0	NA	NA		0	0	0	0	NA	NA		0	0	0	0	NA	NA		0	0	0	0	NA	NA		0	0	0	0	NA	NA
AGGCACAGTTCTGTGGGCGGGGC	23H-RNA	H15N14.4, H37A05.4, Y24F12A.3, Y24F12A.4	1.73205	0	0	0	3.91281	NA		0	0	0	0	NA	NA		0	0	0	0	NA	NA		0	0	0	0	NA	NA		0	0	0	0	NA	NA		0	0	0	0	NA	NA
AGGTACAGAACTGTGGGCGGGGC	23H-RNA	Y24F12A.3, Y24F12A.4	1.73205	0	0	0	3.91281	NA		0	0	0	0	NA	NA		0	0	0	0	NA	NA		0	0	0	0	NA	NA		0	0	0	0	NA	NA		0	0	0	0	NA	NA
AGTGGTTCGTGGCTTCCAAATCC	23H-RNA	T05E12.8	1.73205	3.28059	0	0	5.06768	NA		0	0	0	0	NA	NA		0	0	0	0	NA	NA		0	0	0	0	NA	NA		0	0	0	0	NA	NA		0	0	0	0	NA	NA
ATACGGCTAGCCATATAAAGACC	23H-RNA	C36A4.14	1.73205	6.56118	0	0	5.76261	0.100545		0	0	0	0	NA	NA		0	0	0	0	NA	NA		0	0	0	0	NA	NA		0	0	0	0	NA	NA		0	0	0	0	NA	NA
ATAGCGGCGCGCGGAACCCATG	23H-RNA	PALTA3	1.73205	0	0	0	3.91281	NA		0	0	0	0	NA	NA		0	0	0	0	NA	NA		0	0	0	0	NA	NA		0	0	0	0	NA	NA		0	0	0	0	NA	NA
ATCCTTGTACCAGTTATCTGCA	23H-RNA	K02E2.11	1.73205	0	0	0	3.91281	NA		0	0	0	0	NA	NA		0	0	0	0	NA	NA		0	0	0	0	NA	NA		0	0	0	0	NA	NA		0	0	0	0	NA	NA
ATCTACATGTGATCTACGCGAAT	23H-RNA	pcp-4, Unknown_RE8, Y116F11B.3, Y15E3A.3, Y6B3B.7, Y6B3B.9	1.73205	0	0	0	3.91281	NA		0	0	0	0	NA	NA		0	0	0	0	NA	NA		0	0	0	0	NA	NA		0	1.41421	0	0	2.21349	NA		0	0	0	0	NA	NA
ATCTACCTGTTGAACTTGACTCT	23H-RNA	F08B1.2, gcy-12	1.73205	13.1224	0	0	6.58679	0.0149099		0	0	0	0	NA	NA		0	0	0	0	NA	NA		0	0	0	0	NA	NA		0	0	0	0	NA	NA		0	0	0	0	NA	NA
ATGGCAGCCGATGTGAATGAAGA	23H-RNA	T05E12.8	1.73205	3.28059	0	0	5.06768	NA		0	0	0	0	NA	NA		0	0	0	0	NA	NA		0	0	0	0	NA	NA		0	0	0	0	NA	NA		0	0	0	0	NA	NA
ATGTATGGAGGACGAACACAAC	23H-RNA	C36A4.14	1.73205	3.28059	0.453323	0	3.54494	NA		0	0	0	0	NA	NA		5.02973	0	0	0	6.49962	NA		0	0	0	0	NA	NA		1.03382	0	0	0	1.98461	NA		1.10668	0	0	0	2.36895	NA
CAAAACTGCTGTTTCCCCTGTG	23H-RNA	Y59H11AR.6	1.73205	6.56118	0	0	5.76261	0.100545		0	8.61648	0	0	7.88001	NA		0	0	0	0	NA	NA		0	0	0	0	NA	NA		0	0	0	0	NA	NA		0	0	0	0	NA	NA
CAACCGGACCCTGCCTCTTCATC	23H-RNA	Y57G11C.1145_hairpin	1.73205	3.28059	0	0	5.06768	NA		0	0	0	0	NA	NA		0	0	0	0	NA	NA		0	0	0	0	NA	NA		0	0	0	0	NA	NA		0	0	0	0	NA	NA
CAATCAAAGGATAGTCTCAACA	23H-RNA	F31C3.10, F31C3.9, rrn-3.1, rrn-3.56	1.73205	0	0	0	3.91281	NA		0	0	0	0	NA	NA		0	0	0	0	NA	NA		0	0	0	0	NA	NA		0	0	0	0	NA	NA		1.10668	0	0	0	2.36895	NA
CAGCCATCGTCGTCGTCATCCAC	23H-RNA	Y57G11C.1145_hairpin	1.73205	13.1224	0	0	6.58679	0.0149099		0	0	0	0	NA	NA		0	0	0	0	NA	NA		0	0	0	0	NA	NA		0	0	0	0	NA	NA		0	0	0	0	NA	NA
CATCCCGATCGTTCGTCGTCGC	23H-RNA	ChrX_intergenic1	1.73205	6.56118	0	0	5.76261	0.100545		0	0	0	0	NA	NA		0	0	0	0	NA	NA		0	0	0	0	NA	NA		0	0	0	0	NA	NA		0	0	0	0	NA	NA
CATCGTAAGGCACCCGACACACT	23H-RNA	Y41C4A.17	1.73205	0	0	0	3.91281	NA		0	0	0	0	NA	NA		0	0	0	0	NA	NA		0	0	0	0	NA	NA		0	0	0	0	NA	NA		0	0	0	0	NA	NA
CATCGTCCGATTGGTGAAACCA	23H-RNA	Y17D7C.3	1.73205	0	0	0	3.91281	NA		0	0	0	0	NA	NA		0	0	0	0	NA	NA		0	0	0	0	NA	NA		0	0	0	0	NA	NA		0	0	0	0	NA	NA
CATTCCTACGACATGGAGGTCCCT	23H-RNA	C40A11.10, mir-8199	1.73205	3.28059	0	0	5.06768	NA		0	0	0	0	NA	NA		0	0	0	0	NA	NA		0	0	0	0	NA	NA		0	0	0	0	NA	NA		0	0	0	0	NA	NA
CATTTTTGGTAAGCAGAACTGGC	23H-RNA	F31C3.9, rrn-3.1	1.73205	3.28059	1.81329	0.346508	1.18591	0.81563		0	0	0.327822	0.275156	2.52453	NA		0	6.66725	0.890462	0	2.76858	NA		9.80885	6.22333	2.21336	5.14992	1.09827	0.551758		24.8116	2.82843	26.7183	2.27244	-0.0853988	0.961134		0	1.75743	1.56821	0	-0.0264191	NA
CCAAAGGATCACGAGGCTCTTC	23H-RNA	Unknown_IR1	1.73205	0	0	0	3.91281	NA		0	0	0.0819556	0.137578	3.99304	NA		0	0	0	0	NA	NA		0	0	0	0.735703	-1.13933	NA		0	0	0.556632	0	-0.70837	NA		0	0	0.522735	0	-0.322129	NA
CCACCGTGTCTGGTCTCCTCGCC	23H-RNA	ZK402.3	1.73205	3.28059	0	0	5.06768	NA		0	0	0	0	NA	NA		0	0	0	0	NA	NA		0	0	0	0	NA	NA		0	0	0	0	NA	NA		0	0	0	0	NA	NA
CCATCGGACGAGCTCTTATCCCC	23H-RNA	T05E12.8	1.73205	0	0	0	3.91281	NA		0	0	0	0	NA	NA		0	0	0	0	NA	NA		0	0	0	0	NA	NA		0	0	0	0	NA	NA		0	0	0	0	NA	NA
CCCCATTGCCGAATGTTTGAAT	23H-RNA	Y37E3.30	1.73205	3.28059	0	0	5.06768	NA		0	0	0	0	NA	NA		0	0	0	0	NA	NA		0	0	0	0	NA	NA		0	0	0	0	NA	NA		0	0	0	0	NA	NA
CCCCATTGCCGAATGTTTGAATC	23H-RNA	Y37E3.30	1.73205	0	0	0	3.91281	NA		0	0	0	0	NA	NA		0	0	0	0	NA	NA		0	0	0	0	NA	NA		0	0	0	0	NA	NA		1.10668	0	0	0	2.36895	NA
CCGCATTTTTTGTAGATCAAAGC	23H-RNA	CELE14B	1.73205	0	0	0	3.91281	NA		0	0	0	0	NA	NA		0	0	0	0	NA	NA		0	0	0	0	NA	NA		0	0	0	0	NA	NA		0	0	0	0	NA	NA
CCGGATGTCTGTCACTCTCTAAC	23H-RNA	Unknown_RE2	1.73205	0	0	0	3.91281	NA		0	0	0	0	NA	NA		0	0	0	0	NA	NA		0	0	0	0	NA	NA		0	0	0	0	NA	NA		0	0	0	0	NA	NA
CCGGTCGATGCAATTCTTTTT	23H-RNA	other	1.73205	0	0	0	3.91281	NA		0	0	0	0	NA	NA		0	0	0	0	NA	NA		0	0	0	0	NA	NA		7.23671	0	0	0	4.65505	NA		0	0	0	0	NA	NA
CCTCATACCGCGTATCTATTC	23H-RNA	F47E1.18, linc-22	1.73205	0	0	0	3.91281	NA		0	0	0	0	NA	NA		0	0	0	0	NA	NA		0	0	0	0	NA	NA		0	0	0.556632	0	-0.70837	NA		0	0	0	0	NA	NA
CGAAGAGCCGAGAAGAGAGATCA	23H-RNA	ChrIII_hairpin1	1.73205	0	0	0	3.91281	NA		0	0	0	0	NA	NA		0	0	0	0	NA	NA		0	0	0	0	NA	NA		0	0	0	0	NA	NA		0	0	0	0	NA	NA
CGACGACGAACGATCGGGATG	23H-RNA	ChrX_intergenic1	1.73205	0	0	0	3.91281	NA		0	0	0	0	NA	NA		0	0	0	0	NA	NA		0	0	0	0	NA	NA		0	0	0	0	NA	NA		6.64009	1.75743	0	0	5.07378	NA
CGACGACGATGGCTGCGGCGAG	23H-RNA	Y57G11C.1145_hairpin	1.73205	9.84177	0	0	6.23162	0.0371878		0	0	0	0	NA	NA		0	0	0	0	NA	NA		0	0	0	0	NA	NA		0	0	0	0	NA	NA		0	0	0	0	NA	NA
CGAGGATGATGTGGATGATGG	23H-RNA	Y57G11C.1145_hairpin	1.73205	0	0	0	3.91281	NA		0	0	0	0	NA	NA		0	0	0	0	NA	NA		0	0	0	0	NA	NA		0	0	0	0	NA	NA		0	0	0	0	NA	NA
CGAGGATGATGTGGATGATGGCG	23H-RNA	Y57G11C.1145_hairpin	1.73205	3.28059	0	0	5.06768	NA		0	0	0	0	NA	NA		0	0	0	0	NA	NA		0	0	0	0	NA	NA		0	0	0.556632	0	-0.70837	NA		0	0	0	0	NA	NA
CGCATTTTTTGTAGATCAACGT	23H-RNA	CELE14B	1.73205	0	0	0	3.91281	NA		0	0	0	0	NA	NA		0	0	0	0	NA	NA		0	0	0	0	NA	NA		0	0	0	0	NA	NA		0	0	0	0	NA	NA
CGCGCGCCGCTATGTTTAACTT	23H-RNA	PALTA3	1.73205	6.56118	0	0	5.76261	0.100545		0	0	0	0.137578	4.75198	NA		0	0	0	0.189386	3.53881	NA		0	0	0	0	NA	NA		1.03382	0	0	0	1.98461	NA		0	0	0	0.910207	-0.728152	NA
CGGAGCTGAAGGATCAGAACATC	23H-RNA	Unknown_IR1	1.73205	0	0	0	3.91281	NA		0	0	0	0	NA	NA		0	0	0	0	NA	NA		0	0	0	0	NA	NA		0	0	0	0	NA	NA		0	0	0	0	NA	NA
CGTCGTCATCCACTCCACCGA	23H-RNA	Y57G11C.1145_hairpin	1.73205	3.28059	0	0	5.06768	NA		0	8.61648	0.0819556	0.137578	5.48239	NA		0	0	0	0	NA	NA		0	0	0	0.735703	-1.13933	NA		1.03382	0	0.556632	0	0.670767	NA		1.10668	0	0	0	2.36895	NA
CGTCGTCGTCATCCACTCCACCG	23H-RNA	Y57G11C.1145_hairpin	1.73205	0	0	0	3.91281	NA		0	0	0	0	NA	NA		0	0	0	0	NA	NA		0	0	0	0	NA	NA		0	0	0	0	NA	NA		0	0	0	0	NA	NA
CGTCTGGTTCAGGGTTGTTTA	23H-RNA	F31C3.11, rrn-2.1	1.73205	0	0.453323	0.693017	0.94407	NA		0	0	0.655645	0.550312	1.52471	NA		0	0	0.593641	0.189386	1.43859	NA		4.45857	3.734	4.42673	7.35703	-0.532516	0.800216		6.20289	1.41421	1.66989	6.81732	-0.0578881	NA		0	1.75743	0.522735	1.82041	-0.550088	NA
CTAATAACCGGTATACCGAATT	23H-RNA	E01G4.7	1.73205	0	0	0	3.91281	NA		0	0	0	0	NA	NA		0	0	0	0	NA	NA		0	0	0	0	NA	NA		0	0	0	0	NA	NA		0	0	0	0	NA	NA
CTAATCGTCCCGATCCTTTCATC	23H-RNA	ChrX_intergenic1	1.73205	0	0	0	3.91281	NA		0	0	0	0	NA	NA		0	0	0	0	NA	NA		0	0	0	0	NA	NA		0	0	0	0	NA	NA		0	1.75743	0	0	2.70729	NA
CTACAACGTGGAGCTAAGACACCC	23H-RNA	F55C9.3	1.73205	0	0	0	3.91281	NA		0	0	0	0	NA	NA		0	0	0	0	NA	NA		0	0	0	0	NA	NA		0	0	0	0	NA	NA		1.10668	0	0	0	2.36895	NA
CTATCTACACTCTCTGTACCGA	23H-RNA	other	1.73205	0	0	0	3.91281	NA		0	0	0	0	NA	NA		0	0	0	0	NA	NA		0	0	0	0	NA	NA		0	0	0	0	NA	NA		0	0	0	0	NA	NA
CTATTTTGATAAGTCACTGACAC	23H-RNA	F39E9.29_region	1.73205	3.28059	0	0	5.06768	NA		0	0	0.0819556	0	5.1312	NA		0	0	0	0	NA	NA		0	0	0	0	NA	NA		0	0	0	0	NA	NA		0	0	0	0	NA	NA
CTCAAAATAATAAAACTGCGT	23H-RNA	PALTA3	1.73205	0	0	0	3.91281	NA		0	0	0	0	NA	NA		0	0	0	0	NA	NA		0	0	0	0	NA	NA		0	1.41421	0	1.13622	0.418999	NA		0	0	0	0	NA	NA
CTCGAACTCGCGACCTCTAGATC	23H-RNA	irld-17, Y46H3D.4	1.73205	0	0	0	3.91281	NA		0	0	0	0	NA	NA		0	0	0	0	NA	NA		0	0	0	0	NA	NA		0	0	0	0	NA	NA		0	0	0	0	NA	NA
CTCGACTTTCCAGTTCTACCAT	23H-RNA	T05E12.10	1.73205	0	0	0	3.91281	NA		0	0	0	0	NA	NA		0	0	0	0	NA	NA		0	0	0	0	NA	NA		0	0	0	0	NA	NA		0	0	0	0	NA	NA
CTCGGAAATTGTCGGCCGCTGTG	23H-RNA	ChrV_unknown_hairpin1, other	1.73205	0	0	0	3.91281	NA		0	0	0	0	NA	NA		0	0	0	0	NA	NA		0	0	0	0	NA	NA		0	0	0	0	NA	NA		0	0	0	0	NA	NA
CTCGTCGATCCAGTTTGGCCAA	23H-RNA	F55A4.9, rncs-1	1.73205	3.28059	0	0	5.06768	NA		0	0	0	0	NA	NA		0	0	0	0	NA	NA		0	0	0	0	NA	NA		0	0	0	0	NA	NA		0	0	0	0	NA	NA
CTCTTGCTTCTGTTCCAAATA	23H-RNA	F19B2.5	1.73205	0	0	0	3.91281	NA		0	0	0	0	NA	NA		0	0	0	0	NA	NA		0	0	0	0	NA	NA		0	0	0	0	NA	NA		0	0	0	0	NA	NA
CTTCATCTAAGGCTAAATATCGA	23H-RNA	F31C3.9, rrn-3.1	1.73205	0	0	0.693017	1.63992	NA		0	0	0.573689	0.412734	1.81262	NA		0	0	0.445231	0.378772	1.36944	NA		2.67514	1.24467	0	1.47141	1.33207	NA		5.16908	1.41421	5.00968	1.13622	0.0697258	NA		2.21336	3.51486	0.522735	0	3.12393	NA
GAAGAATGCTGGAACACGTCGT	23H-RNA	Y37E3.30	1.73205	3.28059	0	0.693017	2.75174	NA		0	0	0	0	NA	NA		0	0	0.14841	0	3.71683	NA		0	1.24467	2.21336	0	-0.894691	NA		0	0	0	1.13622	-1.23112	NA		1.10668	0	0.522735	0.910207	-0.105136	NA
GAGTGGGGACTGTCGCTTCGA	23H-RNA	F31C3.7, F31C3.8, rrn-1.1, rrn-1.2	1.73205	3.28059	2.26662	1.38603	0.402793	0.937677		0	0	1.22933	1.10062	0.575437	NA		0	6.66725	1.92933	3.03018	0.24437	NA		2.67514	37.34	5.53341	82.3988	-1.16459	0.4494		1123.76	42.4264	643.466	73.8543	0.700833	0.813282		0	1.75743	0.522735	2.73062	-1.03627	NA
GCAAGCTGCGTTCTTCATCGAT	23H-RNA	F31C3.11, rrn-2.1	1.73205	0	0	0	3.91281	NA		0	0	0	0	NA	NA		0	0	0	0	NA	NA		0	0	0	0	NA	NA		0	0	0	0	NA	NA		0	0	0	0	NA	NA
GCTACACCTCTCATGACTCTT	23H-RNA	F31C3.9, rrn-3.1	1.73205	0	0	0	3.91281	NA		0	0	0	0	NA	NA		0	0	0	0	NA	NA		0.891713	0	0	0	1.5999	NA		0	0	0	0	NA	NA		1.10668	0	0	0	2.36895	NA
GGATTTCGTCAAGACCGAGGAGCT	23H-RNA	C36A4.14	1.73205	6.56118	0	0.346508	4.34768	0.239997		0	0	0	0	NA	NA		0	0	0	0	NA	NA		0	0	1.10668	0	-1.43789	NA		0	0	0	0	NA	NA		0	0	0	0	NA	NA
GTGGAGCCTGCACTGTTGATTTC	23H-RNA	T05E12.8	1.73205	0	0	0	3.91281	NA		0	0	0	0	NA	NA		0	0	0.14841	0	3.71683	NA		0	0	0	0	NA	NA		0	0	0	0	NA	NA		0	0	0	0	NA	NA
TAAAGACGTGGTTTTGACGAAAA	23H-RNA	other, Y54G11A.1	1.73205	0	0	0	3.91281	NA		0	0	0	0	NA	NA		0	0	0	0	NA	NA		0	0	0	0	NA	NA		0	0	0	0	NA	NA		0	0	0	0	NA	NA
TAACGAGACCGCTGAAAAAGTTC	23H-RNA	PAL5A	1.73205	3.28059	0	0	5.06768	NA		0	0	0	0	NA	NA		0	0	0	0	NA	NA		0	0	0	0	NA	NA		0	0	0	0	NA	NA		0	0	0	0	NA	NA
TAATTCTGCAGCCACTTCCGAA	23H-RNA	W03D2.15	1.73205	0	0	0	3.91281	NA		0	0	0	0	NA	NA		0	0	0	0	NA	NA		0	0	0	0	NA	NA		0	0	0	0	NA	NA		0	0	0	0	NA	NA
TACCTGATTTTCATAACGAGACC	23H-RNA	PAL5A	1.73205	0	0	0	3.91281	NA		0	0	0	0	NA	NA		0	0	0	0	NA	NA		0	0	0	0	NA	NA		0	0	0	0	NA	NA		0	0	0	0	NA	NA
TACGGGAAAAGCAGAGAGGCCA	23H-RNA	F39E9.7	1.73205	16.403	0	0	6.87296	0.00657777		0	0	0	0	NA	NA		0	0	0	0	NA	NA		0	0	0	0	NA	NA		0	0	0	0	NA	NA		5.53341	0	0	0	4.48406	NA
TAGAAGACCACTTCCGCAGACGC	23H-RNA	Y37E3.30	1.73205	3.28059	0	0	5.06768	NA		0	0	0	0	NA	NA		0	0	0	0	NA	NA		0	0	0	0	NA	NA		0	0	0	0	NA	NA		0	0	0	0	NA	NA
TAGTTTGTAGCCTGAGCCTCAAC	23H-RNA	other	1.73205	3.28059	0	0	5.06768	NA		0	0	0	0	NA	NA		0	0	0	0	NA	NA		0	0	0	0	NA	NA		0	0	0	0	NA	NA		0	0	0	0	NA	NA
TATCCACTGAGCTATCCATGC	23H-RNA	irld-17, Y46H3D.4	1.73205	0	0	0	3.91281	NA		0	0	0	0	NA	NA		0	0	0	0	NA	NA		0	0	0	0	NA	NA		0	0	0	0	NA	NA		0	0	0	0	NA	NA
TATCGCACTCTTTGCCCTTCCGC	23H-RNA	jmjc-1, T28F2.4	1.73205	3.28059	0	0	5.06768	NA		0	0	0	0	NA	NA		0	0	0	0	NA	NA		0	0	0	0	NA	NA		0	0	0	0	NA	NA		0	0	0	0	NA	NA
TATCTCGATACCATGTCTCACCCA	23H-RNA	Y37E11B.2	1.73205	0	0	0	3.91281	NA		0	0	0	0.275156	3.68651	NA		0	0	0	0.189386	3.53881	NA		0	0	0	0	NA	NA		0	0	0	0	NA	NA		0	0	0	0	NA	NA
TATGTTTAACTCGCAGCGGGCA	23H-RNA	other	1.73205	0	0	0	3.91281	NA		0	0	0	0	NA	NA		0	0	0	0	NA	NA		0	0	0	0.735703	-1.13933	NA		0	0	0	0	NA	NA		0	0	0	0.910207	-0.728152	NA
TATTTGGAACAGAAGCAAGAGGA	23H-RNA	F19B2.5	1.73205	0	0	0	3.91281	NA		0	0	0	0	NA	NA		0	0	0	0	NA	NA		0	0	0	0	NA	NA		0	0	0	0	NA	NA		0	0	0	0	NA	NA
TCAAAGGATCCGGTGAGGCTA	23H-RNA	W04B5.8	1.73205	0	0	0	3.91281	NA		0	0	0	0	NA	NA		0	0	0	0	NA	NA		0	0	0	0	NA	NA		0	0	0	0	NA	NA		0	0	0	0	NA	NA
TCAAAGGATCCGGTGAGGCTAA	23H-RNA	W04B5.8	1.73205	0	0	0	3.91281	NA		0	0	0	0	NA	NA		0	0	0	0	NA	NA		0	0	0	0	NA	NA		0	0	0	0	NA	NA		0	0	0	0	NA	NA
TCACGGGGAAAAGGCAAAATTCG	23H-RNA	PALTA3	1.73205	0	0	0	3.91281	NA		0	0	0	0	NA	NA		0	0	0	0	NA	NA		0	0	0	0	NA	NA		0	0	0	0	NA	NA		0	0	0	0	NA	NA
TCAGGCCGCCGACATCTCATG	23H-RNA	PALTA3	1.73205	0	0	0	3.91281	NA		0	0	0	0	NA	NA		0	0	0	0	NA	NA		0	0	0	0	NA	NA		0	0	0	0	NA	NA		0	0	0	0	NA	NA
TCATCCTCGCCGCAGCCATCGT	23H-RNA	Y57G11C.1145_hairpin	1.73205	0	0	0	3.91281	NA		0	0	0	0	NA	NA		0	0	0	0	NA	NA		0	0	0	0	NA	NA		0	0	0	0	NA	NA		0	0	0	0	NA	NA
TCATCTAAACAACCGTACTGGA	23H-RNA	F31C3.9, rrn-3.1	1.73205	0	0	0	3.91281	NA		0	0	0.245867	0.275156	2.73931	NA		0	0	0.14841	0.378772	2.01996	NA		0	2.48933	0	0.735703	1.49063	NA		20.6763	1.41421	18.3688	0	0.260344	0.955822		3.32005	0	0	0	3.74867	NA
TCATCTCAACCAAGATCTCAAC	23H-RNA	F52D2.6	1.73205	0	0	0	3.91281	NA		0	0	0	0	NA	NA		0	0	0	0	NA	NA		0	0	0	0	NA	NA		0	0	0	0	NA	NA		0	0	0	0	NA	NA
TCATGCGTCTCGGTGGTCCGA	23H-RNA	Y37E3.30	1.73205	0	0	0	3.91281	NA		0	0	0	0	NA	NA		0	0	0	0	NA	NA		0	0	0	0	NA	NA		0	0	0	0	NA	NA		0	0	0	0	NA	NA
TCATGCGTCTCGGTGGTCCGAA	23H-RNA	Y37E3.30	1.73205	0	0	0	3.91281	NA		0	0	0	0	NA	NA		5.02973	0	0	0	6.49962	NA		0	0	0	0	NA	NA		0	0	0	0	NA	NA		0	0	0.522735	0	-0.322129	NA
TCCACGGCGGCCGACAATTTC	23H-RNA	Unknown_hairpin_RE2	1.73205	0	0	0	3.91281	NA		0	0	0	0	NA	NA		0	0	0	0	NA	NA		0	0	0	0	NA	NA		0	0	0	0	NA	NA		0	0	0	0	NA	NA
TCCCGCATTTTTCGTAGATCAAA	23H-RNA	CELE14B	1.73205	0	0	0	3.91281	NA		0	0	0	0	NA	NA		0	0	0	0	NA	NA		0	0	0	0	NA	NA		0	0	0	0	NA	NA		0	0	0	0	NA	NA
TCCGGCGTCCCTTTTGTAGAAAA	23H-RNA	mtd-1, other, ZK337.5	1.73205	3.28059	0	0	5.06768	NA		0	0	0	0	NA	NA		0	0	0	0	NA	NA		0	0	0	0	NA	NA		0	0	0	0	NA	NA		0	0	0	0	NA	NA
TCCTGATCGCTCATCTAAACAACC	23H-RNA	F31C3.9, rrn-3.1	1.73205	0	0.453323	1.38603	0.260358	NA		0	0	0.655645	1.10062	0.990979	NA		5.02973	0	0.445231	0.189386	3.13472	NA		0.891713	0	3.32005	0.735703	-1.96435	NA		21.7101	2.82843	7.79284	2.27244	1.2494	0.413646		1.10668	0	0	4.55104	-1.74866	NA
TCGGCTCTTCGAGCGCGTCTTCTT	23H-RNA	ChrIII_hairpin1	1.73205	3.28059	0	0	5.06768	NA		0	0	0	0	NA	NA		0	0	0	0	NA	NA		0	0	0	0	NA	NA		0	0	0	0	NA	NA		0	0	0	0	NA	NA
TCTCAGAAACATCGGCAAATGGC	23H-RNA	F43E2.6	1.73205	6.56118	0	0	5.76261	0.100545		0	0	0	0	NA	NA		0	0	0	0	NA	NA		0	0	0	0	NA	NA		0	0	0	0	NA	NA		0	0	0	0	NA	NA
TCTCGCCGTCCATGGACTTTAAA	23H-RNA	other	1.73205	0	0	0	3.91281	NA		0	0	0	0	NA	NA		0	0	0	0	NA	NA		0	0	0	0	NA	NA		0	0	0	0	NA	NA		0	0	0	0	NA	NA
TCTTAGAACCCATATATACCCCCT	23H-RNA	Y116F11A.1	1.73205	0	0	0	3.91281	NA		0	0	0	0	NA	NA		0	0	0	0	NA	NA		0	0	0	0	NA	NA		0	0	0	0	NA	NA		0	0	0	0	NA	NA
TGATCTACAAAAAATGCGGGAATT	23H-RNA	CELE14B	1.73205	0	0	0	3.91281	NA		0	0	0	0	NA	NA		0	0	0	0	NA	NA		0	0	0	0	NA	NA		0	0	0	0	NA	NA		0	0	0	0	NA	NA
TGCAACTAAGACACCCCGAACT	23H-RNA	Y37E3.30	1.73205	0	0	0	3.91281	NA		0	0	0	0	NA	NA		0	0	0	0	NA	NA		0	0	0	0	NA	NA		0	0	0	0	NA	NA		0	0	0	0	NA	NA
TGCCTCTTCATCAACTTCTTCC	23H-RNA	Y57G11C.1145_hairpin	1.73205	3.28059	0	0	5.06768	NA		0	0	0	0	NA	NA		0	0	0	0	NA	NA		0	0	0	0	NA	NA		0	0	0	0	NA	NA		0	0	0	0	NA	NA
TGGAAACGTCAAGAAGTTTGATC	23H-RNA	F52G3.8	1.73205	0	0	0	3.91281	NA		0	0	0	0	NA	NA		0	0	0.14841	0	3.71683	NA		0	1.24467	0	0	1.84356	NA		0	0	0	0	NA	NA		0	0	0	0	NA	NA
TGGACAAGTTCAGCGCGCGAACC	23H-RNA	F39E9.29_region	1.73205	3.28059	0	0	5.06768	NA		0	0	0	0	NA	NA		0	0	0	0	NA	NA		0	0	0	0	NA	NA		0	0	0	0	NA	NA		0	0	0	0	NA	NA
TGGTTAGGATTCGTGGTTTTCA	23H-RNA	tRNA	1.73205	0	0	0	3.91281	NA		0	0	0	0	NA	NA		0	0	0.14841	0.189386	2.65873	NA		0	0	0	0	NA	NA		0	2.82843	0	0	3.24312	NA		0	0	0	0	NA	NA
TGTAGATCACACCGTGATGGGAC	23H-RNA	CELE14B	1.73205	3.28059	0	0	5.06768	NA		0	0	0	0	NA	NA		0	0	0	0	NA	NA		0	0	0	0	NA	NA		0	0	0	0	NA	NA		0	0	0	0	NA	NA
TGTAGTTTGTAGTCTAGCAGACC	23H-RNA	TGTAGTTTGTAGTCTAGCAGACC_repeat	1.73205	3.28059	0	0	5.06768	NA		0	0	0	0	NA	NA		0	0	0	0	NA	NA		0	0	0	0	NA	NA		0	0	0	0	NA	NA		0	0	0	0	NA	NA
TGTGCTGAGCTCTTGGATGATC	23H-RNA	puf-10, Y48G1BL.3	1.73205	9.84177	0	0	6.23162	0.0371878		0	0	0	0	NA	NA		0	0	0	0	NA	NA		0	0	0	0	NA	NA		0	0	0	0	NA	NA		0	0	0	0	NA	NA
TGTGGATGATGGCGTGGAAGAA	23H-RNA	Y57G11C.1145_hairpin	1.73205	3.28059	0	0	5.06768	NA		0	0	0	0	NA	NA		0	0	0	0	NA	NA		0	0	0	0	NA	NA		0	0	0	0	NA	NA		0	0	0	0.910207	-0.728152	NA
TGTTTCTGAGATGTCTTCACA	23H-RNA	F43E2.6	1.73205	0	0	0	3.91281	NA		0	0	0	0	NA	NA		0	0	0	0	NA	NA		0	0	0	0	NA	NA		0	0	0	0	NA	NA		0	0	0	0	NA	NA
TGTTTTACACCGGATTGCCAGT	23H-RNA	Y116F11A.1	1.73205	3.28059	0	0	5.06768	NA		0	0	0	0	NA	NA		0	0	0	0	NA	NA		0	0	0	0	NA	NA		0	0	0	0	NA	NA		0	0	0	0	NA	NA
TTAAAGTTGATGGACGGCGAGATT	23H-RNA	PALTTAA1	1.73205	3.28059	0	0	5.06768	NA		0	0	0	0	NA	NA		0	0	0	0	NA	NA		0	0	0	0	NA	NA		0	0	0	0	NA	NA		0	0	0	0	NA	NA
TTAGAGAGTGACAGACATCCGGG	23H-RNA	Unknown_RE2	1.73205	3.28059	0	0	5.06768	NA		0	0	0	0	NA	NA		0	0	0	0	NA	NA		0	0	0	0	NA	NA		0	0	0	0	NA	NA		0	0	0	0	NA	NA
TTCATTCTGCCCTCGCACACACC	23H-RNA	T25G12.8	1.73205	0	0	0	3.91281	NA		0	0	0	0	NA	NA		0	0	0	0	NA	NA		0	0	0	0	NA	NA		0	0	0	0	NA	NA		0	0	0	0	NA	NA
TTCCACGCCATCATCCACATC	23H-RNA	Y57G11C.1145_hairpin	1.73205	3.28059	0	0	5.06768	NA		0	0	0	0	NA	NA		0	0	0	0	NA	NA		0	0	0	0	NA	NA		0	0	0	0	NA	NA		0	0	0	0	NA	NA
TTCGGCAATGGGGTACCCTACG	23H-RNA	Y37E3.30	1.73205	3.28059	0	0.346508	3.66061	NA		0	0	0	0	NA	NA		0	0	0	0	NA	NA		0	0	0	0	NA	NA		0	0	0	0	NA	NA		0	0	0	0	NA	NA
TTCTACATATCCAACGGAGGAAC	23H-RNA	Y17D7C.3	1.73205	0	0	0	3.91281	NA		0	0	0.0819556	0	5.1312	NA		0	0	0	0	NA	NA		0	0	0	0	NA	NA		0	0	0	0	NA	NA		0	0	0	0	NA	NA
TTCTGGAATGAAACGAGTGCTGC	23H-RNA	Y116A8B.1	1.73205	0	0	0	3.91281	NA		0	0	0	0	NA	NA		0	0	0	0	NA	NA		0	0	0	0	NA	NA		0	0	0	0	NA	NA		0	0	0	0	NA	NA
TTGAAGAATTTGAGTGAGGCTGA	23H-RNA	M4.2, puf-4	1.73205	0	0	0	3.91281	NA		0	0	0	0	NA	NA		0	0	0	0	NA	NA		0	0	0	0	NA	NA		0	0	0	0	NA	NA		0	0	0	0	NA	NA
TTGCCTCTGAATGCCGAGTAGGC	23H-RNA	gopc-1, other, ZK849.2	1.73205	0	0	0	3.91281	NA		0	0	0	0	NA	NA		0	0	0	0	NA	NA		0	0	0	0	NA	NA		0	0	0	0	NA	NA		0	0	0	0	NA	NA
TTGCTTAACTTGCCAGATCGGAC	23H-RNA	rrn-4_RE	1.73205	3.28059	0	0	5.06768	NA		0	0	0	0	NA	NA		0	0	0	0	NA	NA		0	0	0	0	NA	NA		0	0	0	0	NA	NA		0	0	0	0	NA	NA
TTGGAATCCGCTTAACAATTGG	23H-RNA	Y105C5A.1272, Y105C5A.14	1.73205	3.28059	0	0	5.06768	NA		0	0	0	0	NA	NA		0	0	0	0	NA	NA		0	0	0	0	NA	NA		0	0	0	0	NA	NA		0	0	0	0	NA	NA
TTGGTGGGCCCTAGACGATTTTG	23H-RNA	MTCE.11, nduo-1	1.73205	0	0	0	3.91281	NA		0	0	0	0	NA	NA		0	0	0	0	NA	NA		0	0	0	0	NA	NA		0	0	0	0	NA	NA		0	0	0	0	NA	NA
TTTCGTCCATACATTGAGGGAGC	23H-RNA	F39E9.10	1.73205	3.28059	0	0	5.06768	NA		0	0	0	0	NA	NA		0	0	0	0	NA	NA		0	0	0	0	NA	NA		0	0	0	0	NA	NA		0	0	0	0	NA	NA
TTTCTCTTCCTCTTGCTTCTGT	23H-RNA	F19B2.5	1.73205	3.28059	0	0	5.06768	NA		0	0	0	0	NA	NA		0	0	0	0	NA	NA		0	0	0	0	NA	NA		0	0	0	0	NA	NA		0	0	0	0	NA	NA
TTTCTCTTCCTCTTGCTTCTGTT	23H-RNA	F19B2.5	1.73205	6.56118	0	0	5.76261	0.100545		0	0	0	0	NA	NA		0	0	0	0	NA	NA		0	0	0	0	NA	NA		0	0	0	0	NA	NA		0	0	0	0	NA	NA
TTTGATCTACGAAAAATGCGGGA	23H-RNA	CELE14B	1.73205	0	0	0	3.91281	NA		0	0	0	0	NA	NA		0	0	0	0	NA	NA		0	0	0	0	NA	NA		0	0	0	0	NA	NA		0	0	0	0	NA	NA
TTTGGAACAGAAGCAAGAGGA	23H-RNA	F19B2.5	1.73205	6.56118	0	0	5.76261	0.100545		0	0	0	0	NA	NA		0	0	0	0	NA	NA		0	0	0	0	NA	NA		0	0	0	0	NA	NA		0	0	0	0	NA	NA
TTTGGCAGCCCCCGACACTTTCG	23H-RNA	F39D8.3	1.73205	0	0	0	3.91281	NA		0	0	0	0	NA	NA		0	0	0	0	NA	NA		0	0	0	0	NA	NA		0	0	0	0	NA	NA		0	0	0	0	NA	NA
TTTTGATCTACCTGTTGAACTTG	23H-RNA	TIR54TA1	1.73205	0	0	0	3.91281	NA		0	0	0	0	NA	NA		0	0	0	0	NA	NA		0	0	0	0	NA	NA		0	0	0	0	NA	NA		0	0	0	0	NA	NA
TTTTTCAGCGGTCTCGTTATGA	23H-RNA	PAL5A	1.73205	0	0	0	3.91281	NA		0	0	0	0	NA	NA		0	0	0	0	NA	NA		0	0	0	0	NA	NA		0	0	0	0	NA	NA		0	0	0	0	NA	NA
AAAAAAGAACTGAAGAGAGTG	23H-RNA	C05E7.1, C05E7.t3	0	0	0	0	NA	NA		0	0	0	0	NA	NA		0	0	0	0	NA	NA		0	0	0	0	NA	NA		1.03382	0	0	0	1.98461	NA		0	0	0	0	NA	NA
AAAAATGTAGAAGCTGTGGGCA	23H-RNA	E01G4.5	0	0	0	0	NA	NA		0	0	0	0	NA	NA		0	0	0	0	NA	NA		0	0	0	0	NA	NA		0	0	0	0	NA	NA		7.74677	1.75743	0	0	5.25397	NA
AAAAGAACTGAAGAGAGTGGGA	23H-RNA	other	0	0	0	0	NA	NA		0	0	0	0	NA	NA		0	0	0	0	NA	NA		0	0	0	0	NA	NA		8.27052	0	0	0	4.84727	NA		0	0	0	0	NA	NA
AAAAGAGTTGATATATGTGGGC	23H-RNA	Y59H11AR.6	0	0	0	0	NA	NA		0	0	0	0	NA	NA		0	0	0	0	NA	NA		0	0	0	0	NA	NA		0	0	0	0	NA	NA		0	0	0	0	NA	NA
AAAATAAAATGTTCTAGCTCTC	23H-RNA	E01G4.5	0	0	0	0	NA	NA		0	0	0	0	NA	NA		0	0	0	0	NA	NA		0	0	0	0	NA	NA		0	0	0	0	NA	NA		0	0	0	0	NA	NA
AAAATTAGCCGCCTACACAACA	23H-RNA	T05E12.10	0	0	0	0	NA	NA		0	0	0	0	NA	NA		0	0	0	0	NA	NA		0	0	0	0	NA	NA		0	0	0	0	NA	NA		1.10668	0	0	0	2.36895	NA
AAAATTCAAATTTAACTCCGTG	23H-RNA	Y69A2AR.16_hairpin	0	0	0	0	NA	NA		0	0	0	0	NA	NA		0	0	0	0	NA	NA		0	0	0	0	NA	NA		3.10145	0	0	0	3.43459	NA		0	0	0	0	NA	NA
AAACAACCCTGAACCAGACGTAC	23H-RNA	F31C3.11, rrn-2.1	0	0	0	0	NA	NA		0	0	0	0	NA	NA		0	0	0	0	NA	NA		0	0	0	0	NA	NA		0	0	0	0	NA	NA		0	0	0	0	NA	NA
AAACATTCGGCAATGGGGTACCC	23H-RNA	Y37E3.30	0	3.28059	0	0	4.31523	NA		0	0	0	0	NA	NA		0	0	0	0	NA	NA		0	0	0	0	NA	NA		0	0	0	0	NA	NA		0	0	0	0	NA	NA
AAACCACGAATCCTAACCACT	23H-RNA	tRNA	0	3.28059	0	0.346508	2.88691	NA		0	0	0	0	NA	NA		0	0	0	0	NA	NA		0	0	0	0	NA	NA		1.03382	0	0	1.13622	0.207999	NA		0	0	0	0	NA	NA
AAACCACGAATCCTAACCACTAG	23H-RNA	tRNA	0	0	0	0	NA	NA		0	0	0	0	NA	NA		0	0	0	0	NA	NA		0	0	0	0	NA	NA		0	0	0	0	NA	NA		0	0	0	0	NA	NA
AAACGGAATCGCTGTCCCGGAC	23H-RNA	F39E9.7	0	0	0	0	NA	NA		0	0	0.0819556	0	5.1312	NA		0	0	0	0.189386	3.53881	NA		0	0	0	0	NA	NA		0	0	0	0	NA	NA		0	0	0	0	NA	NA
AAACTGTATTACGGTGGAGTCT	23H-RNA	other	0	0	0	0	NA	NA		0	0	0	0	NA	NA		0	0	0	0	NA	NA		0	0	0	0	NA	NA		0	0	0	0	NA	NA		0	0	0	0	NA	NA
AAAGAACAAGCCGTGGGCAAGCA	23H-RNA	F39E9.7, F55A4.4	0	0	0	0	NA	NA		0	0	0	0	NA	NA		0	0	0	0	NA	NA		0	0	0	0	NA	NA		0	0	0	0	NA	NA		0	0	0	0	NA	NA
AAATCGGAAACTCAAAGACCAC	23H-RNA	Y17D7C.3	0	0	0	0	NA	NA		0	0	0	0	NA	NA		0	0	0	0	NA	NA		0	0	0	0	NA	NA		0	0	0	0	NA	NA		0	0	0	0	NA	NA
AAATCGGAAACTCAAAGACCACA	23H-RNA	Y17D7C.3	0	0	0	0	NA	NA		0	0	0	0	NA	NA		0	0	0	0	NA	NA		0	0	0	0	NA	NA		0	0	0	0	NA	NA		0	1.75743	0	0	2.70729	NA
AAATCGGAAACTCAAAGACCACAC	23H-RNA	Y17D7C.3	0	0	0	0	NA	NA		0	0	0	0	NA	NA		0	0	0	0	NA	NA		0	0	0	0	NA	NA		0	0	0	0	NA	NA		0	0	0	0	NA	NA
AAATTCAAATTTAACTCCGTG	23H-RNA	Y69A2AR.16_hairpin	0	0	0	0	NA	NA		0	0	0	0	NA	NA		0	6.66725	0	0	6.67224	NA		0	0	0	0	NA	NA		3.10145	0	0	0	3.43459	NA		1.10668	0	0	0	2.36895	NA
AACAACCCTGAACCAGACGTA	23H-RNA	F31C3.11, rrn-2.1	0	0	0	0	NA	NA		0	0	0	0	NA	NA		0	0	0	0	NA	NA		0	0	0	0	NA	NA		0	0	0	0	NA	NA		0	0	0	0	NA	NA
AACAACCCTGAACCAGACGTAC	23H-RNA	F31C3.11, rrn-2.1, rrn-2.1_element	0	0	0	0	NA	NA		0	0	0	0	NA	NA		0	0	0	0	NA	NA		0	0	0	0	NA	NA		0	0	0	0	NA	NA		0	0	0	0	NA	NA
AACCCTGAACCAGACGTACCAA	23H-RNA	F31C3.11, rrn-2.1	0	0	0	0	NA	NA		0	0	0	0	NA	NA		0	0	0	0	NA	NA		0	0	0	0	NA	NA		0	0	0	0	NA	NA		0	0	0	0	NA	NA
AAGAACAAGCCGTGGGCAAGCAC	23H-RNA	F39E9.7, F55A4.4	0	0	0	0	NA	NA		0	0	0	0	NA	NA		0	0	0	0	NA	NA		0	0	0	0	NA	NA		0	0	0	0	NA	NA		0	0	0	0	NA	NA
AAGAAGAAGCATCACGTCGTTT	23H-RNA	Y17D7C.3	0	6.56118	0	0	5.38832	0.226109		0	0	0	0	NA	NA		0	0	0	0	NA	NA		0	0	0	0	NA	NA		0	0	0	0	NA	NA		5.53341	1.75743	0	0	4.86759	NA
AAGAGCCTCGTGATCCTTTGG	23H-RNA	Unknown_IR1	0	3.28059	0	0	4.31523	NA		0	0	0	0	NA	NA		0	0	0	0	NA	NA		0	0	0	0	NA	NA		0	0	0	0	NA	NA		0	0	0	0	NA	NA
AAGAGCCTCGTGATCCTTTGGAG	23H-RNA	Unknown_IR1	0	0	0	0	NA	NA		0	0	0	0	NA	NA		0	0	0	0	NA	NA		0	0	0	0	NA	NA		0	0	0	0	NA	NA		0	0	0	0	NA	NA
AAGCACGCCGTCTCTGAGGGAAC	23H-RNA	other	0	0	0	0	NA	NA		0	0	0	0	NA	NA		0	0	0	0	NA	NA		0	0	0	0	NA	NA		0	0	0	0	NA	NA		0	0	0	0	NA	NA
AAGGACGGAAAGAAGAGACGC	23H-RNA	F55G1.3, his-62	0	0	0	0	NA	NA		0	0	0	0	NA	NA		0	0	0	0	NA	NA		0	0	0	0	NA	NA		0	0	0	0	NA	NA		0	0	0	0	NA	NA
AATAAAAACAATGGACAACTG	23H-RNA	Y59H11AR.6	0	0	0	0	NA	NA		0	0	0	0	NA	NA		0	0	0	0	NA	NA		0	0	0	0	NA	NA		0	0	0	0	NA	NA		0	0	0	0	NA	NA
AATACCACGGGCGATGCCAAATC	23H-RNA	T05E12.8	0	0	0	0	NA	NA		0	0	0	0	NA	NA		0	0	0	0	NA	NA		0	0	0	0	NA	NA		0	0	0	0	NA	NA		0	0	0	0	NA	NA
AATACCTAACGAGACCCAACTTT	23H-RNA	PALTA3	0	0	0	0	NA	NA		0	0	0	0	NA	NA		0	0	0	0	NA	NA		0	0	0	0	NA	NA		0	0	0	0	NA	NA		0	0	0	0	NA	NA
AATACGCCCATTTCTGCAACTG	23H-RNA	DNA-8-1	0	0	0	0	NA	NA		0	0	0	0	NA	NA		0	0	0	0	NA	NA		0	0	0	0	NA	NA		0	0	0	0	NA	NA		0	0	0	0	NA	NA
AATCTACTTAAATCAACGAAT	23H-RNA	mek-2, Y54E10BL.6, Y71F9AL.1	0	6.56118	0	0	5.38832	0.226109		0	0	0	0	NA	NA		0	0	0	0	NA	NA		0	0	0	0	NA	NA		0	0	0	0	NA	NA		0	0	0	0	NA	NA
AATGAAACGAGTGCTGCGAAAAC	23H-RNA	Y116A8B.1	0	3.28059	0	0	4.31523	NA		0	0	0	0	NA	NA		0	0	0	0	NA	NA		0	0	0	0	NA	NA		0	0	0	0	NA	NA		1.10668	0	0	0	2.36895	NA
AATGACTACTGTAGCGCTTGTG	23H-RNA	CELE1	0	0	0	0	NA	NA		0	0	0	0	NA	NA		0	0	0	0	NA	NA		0	0	0	0	NA	NA		0	0	0	0	NA	NA		0	0	0	0	NA	NA
AATTCCACTTGGGGTAAATTCG	23H-RNA	C36A4.14	0	0	0	0	NA	NA		0	0	0	0	NA	NA		0	0	0	0	NA	NA		0	0	0	0	NA	NA		0	0	0	0	NA	NA		0	0	0	0	NA	NA
AATTCTCGTTCTCTCCACACAC	23H-RNA	R119.7, rnp-8	0	0	0	0	NA	NA		0	0	0	0	NA	NA		0	0	0	0	NA	NA		0	0	0	0	NA	NA		0	0	0	0	NA	NA		0	0	0	0	NA	NA
ACAACCCTGAACCAGACGTACC	23H-RNA	F31C3.11, rrn-2.1, rrn-2.1_element	0	0	0	0	NA	NA		0	0	0	0	NA	NA		0	0	0	0	NA	NA		0	0	0	0	NA	NA		0	0	0	0	NA	NA		0	0	0	0	NA	NA
ACAACCCTGAACCAGACGTACCA	23H-RNA	F31C3.11, rrn-2.1	0	0	0	0	NA	NA		0	0	0	0	NA	NA		0	0	0	0	NA	NA		0	0	0	0	NA	NA		0	0	0	0	NA	NA		0	0	0	0	NA	NA
ACCACTGAACCACCGATGCGA	23H-RNA	other	0	0	0	0	NA	NA		0	0	0	0	NA	NA		0	0	0	0	NA	NA		0	0	0	0	NA	NA		0	0	0	0	NA	NA		0	0	0	0	NA	NA
ACCACTTCCGCAGACGCTACAA	23H-RNA	Y37E3.30	0	0	0	0	NA	NA		0	0	0	0	NA	NA		0	0	0	0	NA	NA		0	0	0	0	NA	NA		0	0	0	0	NA	NA		1.10668	0	0	0	2.36895	NA
ACCACTTCCGCAGACGCTACAAC	23H-RNA	Y37E3.30	0	3.28059	0	0	4.31523	NA		0	0	0	0	NA	NA		0	0	0	0	NA	NA		0	0	0	0	NA	NA		0	0	0	0	NA	NA		0	0	0	0	NA	NA
ACCATCCGGATGCTTCATGTTTC	23H-RNA	E01G4.7	0	0	0	0	NA	NA		0	0	0	0	NA	NA		0	0	0	0.189386	3.53881	NA		0	0	0	0	NA	NA		0	0	0	0	NA	NA		0	0	0	0	NA	NA
ACCGAGCTCACAATGATATTGC	23H-RNA	F52G3.8	0	0	0	0	NA	NA		0	0	0	0	NA	NA		0	0	0	0	NA	NA		0	0	0	0	NA	NA		0	0	0	0	NA	NA		0	0	0	0	NA	NA
ACGATGGCTGCGGCGAGGATGA	23H-RNA	Y57G11C.1145_hairpin	0	3.28059	0	0	4.31523	NA		0	0	0	0	NA	NA		0	0	0	0	NA	NA		0	0	0	0	NA	NA		0	0	0	0	NA	NA		0	0	0	0	NA	NA
ACGATTTTGAACGTATAGACCCA	23H-RNA	Y29A2AR.16	0	0	0	0	NA	NA		0	0	0	0	NA	NA		0	0	0	0	NA	NA		0	0	0	0	NA	NA		0	0	0	0	NA	NA		0	0	0	0	NA	NA
ACGGCAACTCGGTCCAAAACCA	23H-RNA	PALNN1	0	0	0	0	NA	NA		0	0	0	0	NA	NA		0	0	0	0	NA	NA		0	0	0	0	NA	NA		0	0	0	0	NA	NA		0	0	0	0	NA	NA
ACGTGTTCCAGCATTCTTCGA	23H-RNA	Y37E3.30	0	0	0	0	NA	NA		0	0	0	0	NA	NA		0	0	0	0	NA	NA		0	0	0	0	NA	NA		0	0	0	0	NA	NA		0	0	0	0	NA	NA
ACTGCTCTACTGAATACAACACC	23H-RNA	F31C3.10, F31C3.9, rrn-3.1, rrn-3.56	0	0	0	0	NA	NA		0	0	0	0	NA	NA		0	0	0	0	NA	NA		0	0	0	0	NA	NA		0	0	0	0	NA	NA		0	0	0	0	NA	NA
ACTTGATTTCTCTGAAAATAGCA	23H-RNA	ZK430.7	0	9.84177	0	0.346508	4.55814	0.215163		0	8.61648	0	0	7.88001	NA		5.02973	0	0	0	6.49962	NA		0	0	0	0	NA	NA		0	0	0	0	NA	NA		0	0	0	0	NA	NA
AGAAGACCATTAGACAGCACCC	23H-RNA	K06C4.23, other	0	6.56118	0	0	5.38832	0.226109		0	0	0	0	NA	NA		0	0	0	0	NA	NA		0	0	0	0	NA	NA		0	0	0	0	NA	NA		0	0	0	0	NA	NA
AGACCACTTCCGCAGACGCTACA	23H-RNA	Y37E3.30	0	0	0	0	NA	NA		0	0	0	0	NA	NA		0	0	0	0	NA	NA		0	0	0	0	NA	NA		0	0	0	0	NA	NA		0	0	0	0	NA	NA
AGAGCTTATGCCCTATGTATGG	23H-RNA	F31C3.10, F31C3.9, rrn-3.1, rrn-3.56	0	0	0	0	NA	NA		0	0	0	0	NA	NA		0	0	0	0	NA	NA		0	0	0	0	NA	NA		6.20289	0	3.33979	1.13622	0.468463	NA		0	0	0	0	NA	NA
AGAGTGACAGACATCCGGGAC	23H-RNA	Unknown_RE2	0	0	0	0	NA	NA		0	0	0	0	NA	NA		0	0	0	0	NA	NA		0	0	0	0	NA	NA		0	0	0	0	NA	NA		0	0	0	0	NA	NA
AGAGTGACAGACATCCGGGACC	23H-RNA	Unknown_RE2	0	6.56118	0	0	5.38832	0.226109		0	0	0	0	NA	NA		0	0	0	0	NA	NA		0	0	0	0	NA	NA		0	0	0	0	NA	NA		0	0	0	0	NA	NA
AGAGTGACAGACATCCGGGACCC	23H-RNA	Unknown_RE2	0	0	0	0	NA	NA		0	0	0	0	NA	NA		0	0	0	0	NA	NA		0	0	0	0	NA	NA		0	0	0	0	NA	NA		0	0	0	0	NA	NA
AGCACTAATAGAGAATATACGGT	23H-RNA	Unknown_RE6	0	0	0	0	NA	NA		0	0	0	0	NA	NA		0	0	0	0	NA	NA		0	0	0	0	NA	NA		0	0	0	0	NA	NA		0	0	0	0	NA	NA
AGCCTCGTGATCCTTTGGAGCTG	23H-RNA	Unknown_IR1	0	0	0	0	NA	NA		0	0	0	0	NA	NA		0	0	0	0	NA	NA		0	0	0	0	NA	NA		0	0	0	0	NA	NA		0	0	0	0	NA	NA
AGCGGTCTCGTTATGAAAATCAG	23H-RNA	PAL5A	0	0	0	0	NA	NA		0	0	0	0	NA	NA		0	0	0	0	NA	NA		0	0	0	0	NA	NA		0	0	0	0	NA	NA		0	0	0	0	NA	NA
AGTGACAGACATCCGGGACCT	23H-RNA	Unknown_RE2	0	0	0	0	NA	NA		0	0	0	0	NA	NA		0	0	0	0	NA	NA		0	0	0	0	NA	NA		0	0	0	0	NA	NA		0	0	0	0	NA	NA
AGTGAGGCTCAGGATTTTGAGTG	23H-RNA	M4.2, puf-4	0	0	0	0	NA	NA		0	0	0	0	NA	NA		0	0	0	0	NA	NA		0	0	0	0	NA	NA		0	0	0	0	NA	NA		0	0	0	0	NA	NA
AGTGGGCCGAGCGATTCGCTGA	23H-RNA	Y116A8C.27	0	0	0	0	NA	NA		0	0	0	0	NA	NA		0	0	0	0	NA	NA		0	0	0	0	NA	NA		0	0	0	0	NA	NA		0	0	0	0	NA	NA
AGTTCAACAGGTAGATCAAAAA	23H-RNA	TIR54TA1	0	0	0	0	NA	NA		0	0	0	0	NA	NA		0	0	0	0	NA	NA		0	0	0	0	NA	NA		0	0	0	0	NA	NA		0	0	0	0	NA	NA
AGTTGGTTGATGCTTGTCCGG	23H-RNA	F31C3.9, rrn-3.1	0	0	0	0	NA	NA		0	0	0.245867	0.550312	2.13597	NA		0	0	0.296821	0.189386	2.12861	NA		1.78343	1.24467	0	1.47141	0.960426	NA		5.16908	2.82843	4.45305	0	0.746932	NA		0	0	0	0	NA	NA
ATAAATCGACGTTTCTTTCACAA	23H-RNA	hcp-1, ZK1055.1	0	0	0	0	NA	NA		0	0	0	0	NA	NA		0	0	0	0	NA	NA		0	0	0	0	NA	NA		0	0	0	0	NA	NA		0	0	0	0	NA	NA
ATACAATGAAAACAACACTTTTG	23H-RNA	F23B2.9	0	0	0	0	NA	NA		0	0	0	0	NA	NA		0	0	0	0	NA	NA		0	0	0	0	NA	NA		0	0	0	0	NA	NA		0	0	0	0	NA	NA
ATAGAGCGAGAATTAACAAGAA	23H-RNA	DNA-8-1	0	3.28059	0	0	4.31523	NA		0	0	0	0	NA	NA		0	0	0	0	NA	NA		0	0	0	0	NA	NA		0	0	0	0	NA	NA		0	0	0	0	NA	NA
ATCACATAACTCCGCCCCCTGA	23H-RNA	other	0	0	0	0	NA	NA		0	0	0	0	NA	NA		0	0	0	0	NA	NA		0	0	0	0	NA	NA		0	0	0	0	NA	NA		0	0	0	0	NA	NA
ATCCTTGTACCAGTTATCTGCAA	23H-RNA	K02E2.11	0	0	0	0	NA	NA		0	0	0	0	NA	NA		0	0	0	0	NA	NA		0	0	0	0	NA	NA		0	0	0	0	NA	NA		0	0	0	0	NA	NA
ATCGGACGAGCTCTTATCCCCTC	23H-RNA	T05E12.8	0	3.28059	0	0	4.31523	NA		10.3577	0	0.0819556	0	6.53162	NA		0	0	0	0	NA	NA		0	0	0	0	NA	NA		0	0	0.556632	0	-0.70837	NA		0	0	0	0	NA	NA
ATGAACCACAAGCGAAATCGCCC	23H-RNA	Y37E3.30	0	0	0	0	NA	NA		0	0	0	0	NA	NA		0	0	0	0	NA	NA		0	0	0	0	NA	NA		0	0	0	0	NA	NA		0	0	0	0	NA	NA
ATGATTTATTGTTCCCGTAAT	23H-RNA	PALTA4	0	0	0	0	NA	NA		0	0	0	0	NA	NA		0	0	0	0	NA	NA		0	0	0	0	NA	NA		0	0	0	0	NA	NA		0	0	0	0	NA	NA
ATGGATAGCTCAGTGGATAGT	23H-RNA	irld-17, Y46H3D.4	0	0	0	0	NA	NA		0	0	0	0	NA	NA		0	0	0	0	NA	NA		0	0	0	0	NA	NA		0	0	0	0	NA	NA		0	0	0.522735	0	-0.322129	NA
ATTAGATACCGTACCCCGAAAACT	23H-RNA	ChrIII_hairpin2	0	3.28059	0	0	4.31523	NA		0	0	0	0	NA	NA		0	0	0	0	NA	NA		0	0	0	0	NA	NA		0	0	0	0	NA	NA		0	0	0	0	NA	NA
ATTGAGACCAGTGATAGCGACC	23H-RNA	F19G12.2, F58F9.1	0	0	0	0	NA	NA		0	0	0	0	NA	NA		5.02973	0	0	0	6.49962	NA		0	0	0	0	NA	NA		0	0	0	0	NA	NA		0	0	0	0	NA	NA
ATTGCCAGTCGAGTCAGAAAATC	23H-RNA	Y116F11A.1	0	0	0	0	NA	NA		0	0	0	0	NA	NA		0	0	0	0	NA	NA		0	0	0	0	NA	NA		0	0	0	0	NA	NA		0	0	0	0	NA	NA
ATTGGCCTACCGAACGAAAAACC	23H-RNA	Y116F11A.1	0	0	0	0	NA	NA		0	0	0	0	NA	NA		0	0	0	0	NA	NA		0	0	0	0	NA	NA		0	0	0	0	NA	NA		0	0	0	0	NA	NA
ATTGTCGGCCGCCGTGGAAAAC	23H-RNA	other	0	6.56118	0	0	5.38832	0.226109		0	0	0	0	NA	NA		0	0	0	0	NA	NA		0	0	0	0	NA	NA		0	0	0	0	NA	NA		0	0	0	0	NA	NA
ATTTAAAGCCGATAGGTAACC	23H-RNA	PALTTAA3	0	0	0	0	NA	NA		0	0	0	0	NA	NA		0	0	0	0	NA	NA		0	0	0	0	NA	NA		0	0	0	0	NA	NA		0	0	0	0	NA	NA
CAAAAATCGCCCGAAAATTCAC	23H-RNA	pde-2, R08D7.6	0	0	0	0	NA	NA		0	0	0	0	NA	NA		0	0	0	0	NA	NA		0	0	0	0	NA	NA		0	0	0	0	NA	NA		0	0	0	0	NA	NA
CAAAATTGGCGGAGCGATCGTTC	23H-RNA	other	0	3.28059	0	0	4.31523	NA		0	0	0	0	NA	NA		0	0	0	0	NA	NA		0	0	0	0	NA	NA		0	0	0	0	NA	NA		0	0	0	0	NA	NA
CAAAATTTCCGCCCCATGCTTAC	23H-RNA	Y37E3.30	0	0	0	0	NA	NA		0	0	0	0	NA	NA		0	0	0	0	NA	NA		0	0	0	0	NA	NA		0	0	0	0	NA	NA		0	0	0	0	NA	NA
CAAATCGTCTCTTCCGCGCGCC	23H-RNA	Unknown_RE2	0	0	0	0	NA	NA		0	0	0	0	NA	NA		0	0	0	0	NA	NA		0	0	0	0	NA	NA		0	0	0	0	NA	NA		0	0	0	0	NA	NA
CAACCCTGAACCAGACGTACCA	23H-RNA	F31C3.11, rrn-2.1	0	0	0	0	NA	NA		0	0	0	0	NA	NA		0	0	0	0	NA	NA		0	0	0	0	NA	NA		0	0	0	0	NA	NA		0	0	0	0	NA	NA
CAACGTCTCGGCTAGCCACCT	23H-RNA	T05E12.8	0	3.28059	0	0	4.31523	NA		0	0	0	0.137578	4.75198	NA		0	0	0	0	NA	NA		0	0	0	0	NA	NA		0	1.41421	0.556632	0	0.875181	NA		73.041	22.8466	0.522735	0	7.1768	0.000325556
CAACGTCTCGGCTAGCCACCTA	23H-RNA	T05E12.8	0	3.28059	0	0	4.31523	NA		0	0	0	0.137578	4.75198	NA		0	0	0	0	NA	NA		0	0	0	0	NA	NA		0	0	0	0	NA	NA		38.7339	7.02973	0	0	7.51673	0.00112556
CAAGTTCAACAGGTAGATCAAAA	23H-RNA	TIR54TA1	0	3.28059	0	0	4.31523	NA		0	0	0	0	NA	NA		0	0	0	0	NA	NA		0	0	0	0	NA	NA		0	0	0	0	NA	NA		0	0	0	0	NA	NA
CAATGAAAACAACACTTTTGGT	23H-RNA	F23B2.9	0	0	0	0	NA	NA		0	0	0	0	NA	NA		0	0	0	0	NA	NA		0	0	0	0	NA	NA		0	0	0	0	NA	NA		0	0	0	0	NA	NA
CAATGTATGGAGGACGAACACA	23H-RNA	C36A4.14	0	0	0	0	NA	NA		0	0	0	0	NA	NA		0	0	0	0	NA	NA		0	0	0	0	NA	NA		0	0	0	0	NA	NA		0	0	0	0	NA	NA
CACATCATCCTCGCCGCAGCCAT	23H-RNA	Y57G11C.1145_hairpin	0	6.56118	0	0	5.38832	0.226109		0	0	0	0	NA	NA		0	0	0	0	NA	NA		0	0	0	0	NA	NA		0	0	0	0	NA	NA		0	0	0	0	NA	NA
CACCGTCCTGCTGTCAATATCA	23H-RNA	F31C3.9, rrn-3.1	0	0	0	0	NA	NA		0	0	0	0	NA	NA		0	0	0	0	NA	NA		0	0	0	0	NA	NA		0	0	0	0	NA	NA		0	0	0	0	NA	NA
CACGGGGCGATCCAAGAACCT	23H-RNA	Y81B9A.5	0	6.56118	0.453323	0.693017	2.36148	0.594423		31.073	34.4659	0.245867	0.137578	7.33717	7.91109e-12		80.4757	46.6707	1.63251	0.189386	6.08822	7.64778e-09		7.13371	2.48933	2.21336	2.94281	0.911705	0.696446		6.20289	7.07107	1.66989	1.13622	2.19772	NA		1.10668	0	1.04547	1.82041	-1.10279	NA
CACGGTGCCAGATCCTGAAAACG	23H-RNA	other	0	0	0	0	NA	NA		0	0	0	0	NA	NA		0	0	0	0	NA	NA		0	0	0	0	NA	NA		0	0	0	0	NA	NA		0	0	0	0	NA	NA
CACTAATAGGGAACGTGAGCT	23H-RNA	F31C3.10, F31C3.9, rrn-3.1, rrn-3.56	0	3.28059	2.26662	2.77207	-0.950039	0.859825		0	0	2.86845	3.1643	-0.794348	NA		5.02973	6.66725	3.26503	4.1665	0.634604	0.72948		38.3437	26.138	33.2005	37.5209	-0.128704	0.911654		307.043	19.799	376.283	17.0433	-0.267369	0.937595		8.85346	5.2723	6.27282	6.37145	0.180819	0.949159
CACTTACCAGCACACAGAGACGC	23H-RNA	Y57G11C.51	0	13.1224	0	0	6.39613	0.0369167		0	0	0	0	NA	NA		0	0	0	0	NA	NA		0	0	0	0	NA	NA		0	0	0	0	NA	NA		0	1.75743	0	0	2.70729	NA
CAGACATGATCTGGAGATGTTT	23H-RNA	Y116A8B.1	0	0	0	0	NA	NA		0	0	0	0	NA	NA		0	0	0	0	NA	NA		0	0	0	0	NA	NA		0	0	0	0	NA	NA		3.32005	0	0	0	3.74867	NA
CAGCACGACGTAGACGGAAAGGA	23H-RNA	H15N14.4	0	0	0	0	NA	NA		0	0	0	0	NA	NA		0	0	0	0	NA	NA		0	0	0	0	NA	NA		0	0	0	0	NA	NA		0	0	0	0	NA	NA
CAGCCGGCCCTTACCGTTTAAT	23H-RNA	mir-5592	0	0	0	0	NA	NA		0	0	0	0	NA	NA		0	0	0	0	NA	NA		0	0	0	0	NA	NA		0	0	0	0	NA	NA		0	0	0	0	NA	NA
CAGCCGGCCCTTACCGTTTAATA	23H-RNA	mir-5592	0	3.28059	0	0	4.31523	NA		0	17.233	0.0819556	0	7.47944	0.000617113		5.02973	6.66725	0.14841	0.189386	5.10885	NA		0	0	0	0	NA	NA		1.03382	0	0.556632	0	0.670767	NA		0	0	0	0	NA	NA
CAGCGAATCGCTCTGCCCACTT	23H-RNA	Y116A8C.27	0	3.28059	0	0	4.31523	NA		0	0	0	0	NA	NA		0	0	0	0	NA	NA		0	0	0	0	NA	NA		0	0	0	0	NA	NA		0	0	0	0	NA	NA
CATATCCCATGAATTGTCCGCA	23H-RNA	linc-17, Y49F6A.9	0	0	0	0	NA	NA		0	0	0	0	NA	NA		0	0	0	0	NA	NA		0	0	0	0	NA	NA		0	0	0	0	NA	NA		1.10668	0	0	0	2.36895	NA
CATCAGCACCAACACCTCACCC	23H-RNA	C36A4.14	0	0	0	0	NA	NA		0	0	0	0	NA	NA		0	0	0	0	NA	NA		0	0	0	0	NA	NA		0	0	0	0	NA	NA		0	0	0	0	NA	NA
CATCATCCTCGCCGCAGCCAT	23H-RNA	Y57G11C.1145_hairpin	0	3.28059	0	0	4.31523	NA		0	0	0	0	NA	NA		0	0	0	0	NA	NA		0	0	0	0	NA	NA		0	0	0	0	NA	NA		0	0	0	0	NA	NA
CATCCCGATCGTTCGTCGTCGCC	23H-RNA	ChrX_intergenic1	0	3.28059	0.453323	0	2.73704	NA		0	0	0	0	NA	NA		0	0	0	0	NA	NA		0	0	0	0	NA	NA		0	0	0	0	NA	NA		0	0	0	0	NA	NA
CATGACGGTTTGATCTACAAA	23H-RNA	CELE14B	0	0	0	0	NA	NA		0	0	0	0	NA	NA		0	0	0	0	NA	NA		0	0	0	0	NA	NA		0	0	0	0	NA	NA		0	0	0	0	NA	NA
CATGAGATGTCGGCGGCCTGAT	23H-RNA	PALTA3	0	0	0	0	NA	NA		0	0	0	0	NA	NA		0	0	0	0	NA	NA		0	0	0	0	NA	NA		0	0	0	0	NA	NA		0	0	0	0	NA	NA
CATGGCCGTTCTTAGTTGGTGGA	23H-RNA	F31C3.7, F31C3.8, rrn-1.1, rrn-1.2	0	0	0	0	NA	NA		0	0	0.245867	0.275156	2.73931	NA		0	0	0.14841	0	3.71683	NA		0.891713	1.24467	0	0.735703	1.30359	NA		18.6087	1.41421	6.12295	0	1.6187	0.391111		0	1.75743	0	0	2.70729	NA
CATTTCTACAAGTCTCATGTTGA	23H-RNA	M01E5.3	0	0	0	0	NA	NA		0	0	0	0	NA	NA		0	0	0	0	NA	NA		0	0	0	0	NA	NA		0	0	0	0	NA	NA		0	0	0	0	NA	NA
CCAAAGGATCACGAGGCTCTTCC	23H-RNA	Unknown_IR1	0	0	0	0	NA	NA		0	0	0	0	NA	NA		0	0	0	0	NA	NA		0	0	0	0	NA	NA		0	0	0.556632	0	-0.70837	NA		0	0	0	0	NA	NA
CCACCGTGTCTGGTCTCCTCGC	23H-RNA	ZK402.3	0	3.28059	0	0	4.31523	NA		0	0	0	0	NA	NA		0	0	0	0	NA	NA		0	0	0	0	NA	NA		0	0	0	0	NA	NA		0	0	0	0	NA	NA
CCAGATCCGGAAAACGTAGATCC	23H-RNA	other	0	0	0	0	NA	NA		0	0	0	0	NA	NA		0	0	0	0	NA	NA		0	0	0	0	NA	NA		0	0	0	0	NA	NA		0	0	0	0	NA	NA
CCATCGGACGAGCTCTTATCCCCT	23H-RNA	T05E12.8	0	0	0	0	NA	NA		0	0	0	0	NA	NA		0	0	0	0	NA	NA		0	0	0	0	NA	NA		0	0	0	0	NA	NA		0	0	0	0	NA	NA
CCCCGAACGCAGATTTATTTTT	23H-RNA	T04D3.t1	0	0	0	0	NA	NA		0	0	0	0	NA	NA		0	0	0	0	NA	NA		0	0	0	0	NA	NA		0	0	0	0	NA	NA		0	0	0	0	NA	NA
CCCCGTGAGGACCGTGTACGCCC	23H-RNA	Y116A8B.1	0	0	0	0	NA	NA		0	0	0	0	NA	NA		0	0	0	0	NA	NA		0	0	0	0	NA	NA		0	0	0	0	NA	NA		0	0	0	0	NA	NA
CCCGCATTTTTTGTAGATCAGA	23H-RNA	CELE14B	0	0	0	0	NA	NA		0	0	0	0	NA	NA		0	0	0	0	NA	NA		0	0	0	0	NA	NA		0	0	0	0	NA	NA		0	0	0	0	NA	NA
CCCGCCCACAGAACTGTGCCTTG	23H-RNA	H15N14.4, H37A05.4, Y24F12A.3, Y24F12A.4	0	3.28059	0	0	4.31523	NA		0	0	0	0	NA	NA		0	0	0	0	NA	NA		0	0	0	0	NA	NA		0	0	0	0	NA	NA		0	0	0	0	NA	NA
CCCGCCCACAGTTCTGTACCTTG	23H-RNA	Y24F12A.3, Y24F12A.4	0	0	0	0	NA	NA		0	0	0	0	NA	NA		0	0	0	0	NA	NA		0	0	0	0	NA	NA		0	0	0	0	NA	NA		0	0	0	0	NA	NA
CCCGCCCACGATTTCATTTGC	23H-RNA	mir-5550_RE	0	0	0	0	NA	NA		0	0	0	0	NA	NA		0	0	0	0	NA	NA		0	0	0	0	NA	NA		0	0	0	0	NA	NA		0	0	0	0	NA	NA
CCCGCGGGTGATGACAGAAAC	23H-RNA	dnj-27_element	0	0	0	0	NA	NA		0	0	0	0	NA	NA		0	0	0	0	NA	NA		0	0	0	0	NA	NA		0	0	0	0	NA	NA		0	0	0	0	NA	NA
CCCGTCTAGGTGATCTTTCAACA	23H-RNA	Y37E3.30	0	0	0	0	NA	NA		0	0	0	0	NA	NA		0	0	0	0	NA	NA		0	0	0	0	NA	NA		0	0	0	0	NA	NA		0	0	0	0	NA	NA
CCCTACTCTTCGCATCTCATC	23H-RNA	Y67D8A.2	0	0	0	0	NA	NA		0	0	0	0	NA	NA		0	0	0	0	NA	NA		0	0	0	0	NA	NA		0	0	0	0	NA	NA		0	0	0	0	NA	NA
CCCTTACGATCCTTCTTATCTGA	23H-RNA	Unknown_IR1	0	0	0	0	NA	NA		0	0	0	0	NA	NA		0	0	0	0	NA	NA		0	0	0	0	NA	NA		0	0	0	0	NA	NA		0	0	0	0	NA	NA
CCCTTCTACTTGGACGGAACA	23H-RNA	Y17D7C.3	0	6.56118	0	0	5.38832	0.226109		0	0	0	0	NA	NA		0	0	0	0	NA	NA		0	0	0	0	NA	NA		0	0	0	0	NA	NA		1.10668	0	0	0	2.36895	NA
CCCTTTGTACACACCGCCCGTCG	23H-RNA	F31C3.7, F31C3.8, rrn-1.1, rrn-1.2	0	0	0	0.346508	1.19984	NA		0	0	0.0819556	0.137578	3.99304	NA		0	0	0.14841	0	3.71683	NA		1.78343	0	0	0	2.45526	NA		4.13526	1.41421	2.22653	0	1.20299	NA		0	0	0	0	NA	NA
CCGATTATTCTGGAACAAGTAT	23H-RNA	MTCE.7	0	0	0	0	NA	NA		0	0	0	0	NA	NA		0	0	0	0	NA	NA		0	0	0	0	NA	NA		0	0	0	0	NA	NA		0	0	0	0	NA	NA
CCGATTTCTGCCCCCCCAAAAT	23H-RNA	PAL8C	0	0	0	0	NA	NA		0	0	0	0	NA	NA		0	0	0	0	NA	NA		0	0	0	0	NA	NA		0	0	0	0	NA	NA		0	0	0	0	NA	NA
CCGCCCACAGAACTGTACCTTGC	23H-RNA	H15N14.4, H37A05.4	0	0	0	0	NA	NA		0	0	0	0	NA	NA		0	0	0	0	NA	NA		0	0	0	0	NA	NA		0	0	0	0	NA	NA		0	0	0	0	NA	NA
CCGCCCACAGTTCTGTACCTTG	23H-RNA	Y24F12A.3, Y24F12A.4	0	0	0	0	NA	NA		0	0	0	0	NA	NA		0	0	0	0	NA	NA		0	0	0	0	NA	NA		0	0	0.556632	0	-0.70837	NA		0	0	0	0	NA	NA
CCGCCCACAGTTCTGTACCTTGC	23H-RNA	Y24F12A.3, Y24F12A.4	0	0	0	0	NA	NA		0	0	0	0	NA	NA		0	0	0	0	NA	NA		0	0	0	0	NA	NA		0	0	0	0	NA	NA		0	0	0	0	NA	NA
CCGCGCGCCGCTATGTTTAACTT	23H-RNA	PALTA3	0	3.28059	0	0	4.31523	NA		0	0	0	0	NA	NA		0	6.66725	0	0	6.67224	NA		0	0	0	0	NA	NA		2.06763	0	0.556632	0	1.53979	NA		0	0	0	0	NA	NA
CCGTCTAGGTGATCTTTCAACA	23H-RNA	Y37E3.30	0	0	0	0	NA	NA		0	0	0	0	NA	NA		0	0	0	0	NA	NA		0	0	0	0	NA	NA		0	0	0	0	NA	NA		0	0	0	0	NA	NA
CCGTGAGTGGACGAGAAAAAGG	23H-RNA	PALTA3	0	0	0	0	NA	NA		0	0	0	0	NA	NA		0	0	0	0	NA	NA		0	0	0	0	NA	NA		0	0	0	0	NA	NA		0	0	0	0	NA	NA
CCTCATACCGCGTATCTATTCA	23H-RNA	F47E1.18, linc-22	0	3.28059	0	0	4.31523	NA		0	0	0	0	NA	NA		0	0	0	0	NA	NA		0	0	0	0	NA	NA		0	0	0	0	NA	NA		0	0	0	0	NA	NA
CCTCCCGATAGAATGAATTTTC	23H-RNA	Y57G11C.1144	0	0	0	0	NA	NA		0	0	0	0	NA	NA		0	0	0	0	NA	NA		0	0	0	0	NA	NA		0	0	0	0	NA	NA		0	0	0	0	NA	NA
CCTCGAGAGCGCGACAAAAACT	23H-RNA	W03D2.15	0	0	0	0	NA	NA		0	0	0	0	NA	NA		0	0	0	0	NA	NA		0	0	0	0	NA	NA		0	0	0	0	NA	NA		0	0	0	0	NA	NA
CCTTACGATCCTTCTTATCTGA	23H-RNA	Unknown_IR1	0	0	0	0	NA	NA		0	0	0	0	NA	NA		0	0	0	0	NA	NA		0	0	0	0	NA	NA		0	0	0	0	NA	NA		0	0	0	0	NA	NA
CCTTCGACATCTCTGATAACAA	23H-RNA	F58A4.3, hcp-3	0	0	0	0	NA	NA		0	0	0	0	NA	NA		0	0	0	0	NA	NA		0	0	0	0	NA	NA		0	0	0	0	NA	NA		0	0	0	0	NA	NA
CCTTCTACTTGGACGGAACAGCC	23H-RNA	Y17D7C.3	0	6.56118	0	0	5.38832	0.226109		0	0	0	0	NA	NA		0	0	0.14841	0	3.71683	NA		0	0	0	0	NA	NA		0	0	0	0	NA	NA		0	0	0	0	NA	NA
CCTTGATTCTCAAAGTGCAGACC	23H-RNA	W03D2.15	0	0	0	0	NA	NA		0	0	0	0	NA	NA		0	0	0	0	NA	NA		0	0	0	0	NA	NA		0	0	0	0	NA	NA		0	0	0	0	NA	NA
CGACCGGACGCCGATTTGTACAG	23H-RNA	Unknown_hairpin_RE2	0	0	0	0	NA	NA		0	0	0	0	NA	NA		0	0	0	0	NA	NA		0	0	0	0	NA	NA		0	0	0	0	NA	NA		0	0	0	0	NA	NA
CGACGGATCAGTGTTGCCACT	23H-RNA	T05E12.8	0	3.28059	0	0	4.31523	NA		0	0	0	0	NA	NA		0	0	0	0	NA	NA		0	0	0	0	NA	NA		0	0	0	0	NA	NA		0	0	0	0.910207	-0.728152	NA
CGACGTGTTCCAGCATTCTTCGAC	23H-RNA	Y37E3.30	0	0	0	0	NA	NA		0	0	0	0	NA	NA		0	0	0	0	NA	NA		0	0	0	0	NA	NA		0	0	0	0	NA	NA		0	0	0	0	NA	NA
CGATGGATTCTTTGGAGCAAC	23H-RNA	F55A4.9, rncs-1	0	3.28059	0	0	4.31523	NA		0	0	0	0	NA	NA		0	0	0	0	NA	NA		0	0	0	0	NA	NA		0	0	0	0	NA	NA		0	0	0	0	NA	NA
CGATGGCTGCGGCGAGGATGA	23H-RNA	Y57G11C.1145_hairpin	0	0	0	0	NA	NA		0	0	0	0	NA	NA		0	0	0	0	NA	NA		0	0	0	0	NA	NA		0	0	0	0	NA	NA		0	0	0	0	NA	NA
CGCATTTTTTGTAGATCAAACC	23H-RNA	CELE14B	0	0	0	0	NA	NA		0	0	0	0	NA	NA		0	0	0	0	NA	NA		0	0	0	0	NA	NA		0	0	0	0	NA	NA		0	0	0	0	NA	NA
CGCCACGAGCGGTGGAGCCTGCA	23H-RNA	T05E12.8	0	0	0	0	NA	NA		0	0	0	0	NA	NA		0	0	0	0	NA	NA		0	0	0	0	NA	NA		0	0	0	0	NA	NA		0	0	0	0	NA	NA
CGCGCCGCTATGTTTAACTCGCA	23H-RNA	PALTA3	0	3.28059	0	0	4.31523	NA		0	0	0	0	NA	NA		0	0	0	0	NA	NA		0	0	0	0	NA	NA		0	0	0	0	NA	NA		0	0	0	0	NA	NA
CGCGCGGTTTGGTCCAGTCTCC	23H-RNA	E01G4.5	0	3.28059	0	0	4.31523	NA		0	0	0	0	NA	NA		0	0	0	0	NA	NA		0	0	0	0	NA	NA		0	0	0	0	NA	NA		1.10668	0	0	0	2.36895	NA
CGCGTAGGTCTAAATTATTTTG	23H-RNA	other	0	0	0	0	NA	NA		0	0	0	0	NA	NA		0	0	0	0	NA	NA		0	0	0	0	NA	NA		0	0	0	0	NA	NA		0	0	0	0	NA	NA
CGGAAACTGAAGCCCCAAAATC	23H-RNA	other	0	0	0	0	NA	NA		0	0	0	0	NA	NA		0	0	0	0	NA	NA		0	0	0	0	NA	NA		0	0	0	0	NA	NA		0	0	0	0	NA	NA
CGGAATGGTTCAAAAATCGAGCC	23H-RNA	F52G3.8	0	0	0	0	NA	NA		0	0	0	0	NA	NA		0	0	0	0	NA	NA		0	0	0	0	NA	NA		0	0	0	0	NA	NA		0	0	0	0	NA	NA
CGGATAGTGTGATCTTAGAACCC	23H-RNA	Y116F11A.1	0	6.56118	0	0	5.38832	0.226109		0	0	0	0	NA	NA		0	0	0	0	NA	NA		0	0	0	0	NA	NA		0	0	0	0	NA	NA		0	0	0	0	NA	NA
CGGATGTCTGTCACTCTCTAAC	23H-RNA	Unknown_RE2	0	0	0	0	NA	NA		0	0	0	0	NA	NA		0	0	0	0	NA	NA		0	0	0	0	NA	NA		0	0	0	0	NA	NA		0	0	0	0	NA	NA
CGGCGGCCGACGATTTCTGAGTT	23H-RNA	F23D12.11	0	0	0	0	NA	NA		0	0	0	0	NA	NA		0	0	0	0	NA	NA		0	0	0	0	NA	NA		0	0	0	0	NA	NA		0	0	0	0	NA	NA
CGTACACAACCGAGCTCCGCC	23H-RNA	F49B2.3, Y116A8B.1	0	3.28059	0	0	4.31523	NA		0	0	0	0	NA	NA		0	0	0	0	NA	NA		0	0	0	0	NA	NA		0	0	0	0	NA	NA		0	0	0	0	NA	NA
CGTATATTCTCTATTAGTGCTGC	23H-RNA	Unknown_RE6	0	0	0	0	NA	NA		0	0	0	0	NA	NA		0	0	0	0	NA	NA		0	0	0	0	NA	NA		0	0	0	0	NA	NA		0	0	0	0	NA	NA
CGTATATTCTCTATTAGTGCTGT	23H-RNA	other, ZK792.4	0	3.28059	0	0	4.31523	NA		0	0	0	0	NA	NA		0	0	0	0	NA	NA		0	0	0	0	NA	NA		0	0	0	0	NA	NA		0	0	0	0	NA	NA
CGTATTGCAAGCCACGGTTCTGT	23H-RNA	DNA-8-1	0	0	0	0	NA	NA		0	0	0	0	NA	NA		0	0	0	0	NA	NA		0	0	0	0	NA	NA		0	0	0	0	NA	NA		0	0	0	0	NA	NA
CGTCCTGCTGTCAATATCAACCA	23H-RNA	F31C3.9, rrn-3.1	0	0	0	0	NA	NA		0	0	0	0	NA	NA		0	0	0	0	NA	NA		0	0	0	0	NA	NA		0	0	0	0	NA	NA		0	0	0	0	NA	NA
CGTCGCGGCCGAGCTTCCCAAA	23H-RNA	Y71H2B.5	0	0	0	0	NA	NA		0	0	0	0	NA	NA		0	0	0	0	NA	NA		0	0	0	0	NA	NA		0	0	0	0	NA	NA		0	0	0	0	NA	NA
CGTGGCGTGTACTGCAGAAAACC	23H-RNA	PALTA3	0	0	0	0	NA	NA		0	0	0	0	NA	NA		0	0	0	0	NA	NA		0	0	0	0	NA	NA		0	0	0	0	NA	NA		0	0	0	0	NA	NA
CTATCAATACTCTATGTTTTTT	23H-RNA	C35D6.3	0	0	0	0	NA	NA		0	0	0	0	NA	NA		0	0	0	0	NA	NA		0	0	0	0	NA	NA		0	0	0	0	NA	NA		2.21336	0	0	0	3.16472	NA
CTATCTACACTCTCTGTACCGT	23H-RNA	other	0	3.28059	0	0	4.31523	NA		0	0	0	0	NA	NA		0	0	0.14841	0	3.71683	NA		0	0	0	0	NA	NA		0	0	0	0	NA	NA		0	0	0	0	NA	NA
CTCAAAATCCTGAGCCTCACTCA	23H-RNA	M4.2, puf-4	0	0	0	0	NA	NA		0	0	0	0	NA	NA		0	0	0	0	NA	NA		0	0	0	0	NA	NA		0	0	0	0	NA	NA		0	0	0	0	NA	NA
CTCAACAGATCGCAGTATAAAA	23H-RNA	F31C3.10, F31C3.9, rrn-3.1, rrn-3.56	0	0	0	0	NA	NA		0	0	0	0	NA	NA		0	0	0	0	NA	NA		0	0	0	0	NA	NA		0	0	0	0	NA	NA		0	0	0	0	NA	NA
CTCAGGATTTTGAGTGAGGCTCA	23H-RNA	M4.2, puf-4	0	0	0	0	NA	NA		0	0	0	0	NA	NA		0	0	0	0	NA	NA		0	0	0	0	NA	NA		0	0	0	0	NA	NA		0	0	0	0	NA	NA
CTCCAGGTCCATCTACAAACAAC	23H-RNA	K02E2.11	0	0	0	0	NA	NA		0	0	0.0819556	0	5.1312	NA		0	0	0	0	NA	NA		0	0	1.10668	0	-1.43789	NA		0	0	0	0	NA	NA		0	0	0	0.910207	-0.728152	NA
CTCCATACGGTCATTTGAGTCTC	23H-RNA	F34D6.11, linc-12	0	0	0	0	NA	NA		0	0	0	0	NA	NA		0	0	0	0	NA	NA		0	0	0	0	NA	NA		0	0	0	0	NA	NA		0	0	0	0	NA	NA
CTCCTCGGTCTTGACGAAATCCCA	23H-RNA	C36A4.14	0	0	0	0	NA	NA		0	0	0	0	NA	NA		0	0	0	0	NA	NA		0	0	0	0	NA	NA		0	0	0	0	NA	NA		0	0	0	0	NA	NA
CTCGAATCAGTTCAGTCCCGGAT	23H-RNA	F31C3.7, F31C3.8, rrn-1.1, rrn-1.2	0	0	0	0	NA	NA		0	0	0	0	NA	NA		0	0	0	0	NA	NA		0	0	0	0	NA	NA		0	0	0	0	NA	NA		0	0	0	0	NA	NA
CTCTTCAGCTGACTACACTCTCT	23H-RNA	rft-2, Y47D7A.14_IR, Y47D7A.14_IR_element	0	0	0	0	NA	NA		0	0	0	0	NA	NA		0	0	0	0	NA	NA		0	0	0	0	NA	NA		0	0	0	0	NA	NA		0	0	0	0	NA	NA
CTCTTCGAGCGCGTCTTCTTTA	23H-RNA	ChrIII_hairpin1	0	0	0	0	NA	NA		0	0	0	0	NA	NA		0	0	0	0	NA	NA		0	0	0	0	NA	NA		0	0	0	0	NA	NA		0	0	0	0	NA	NA
CTGAGGATTTTGAGTGAGGCTGA	23H-RNA	M4.2, puf-4	0	0	0	0	NA	NA		0	0	0	0	NA	NA		0	0	0	0	NA	NA		0	0	0	0	NA	NA		0	0	0	0	NA	NA		0	0	0	0	NA	NA
CTGCCTGCCCAGAGCTAAGTACC	23H-RNA	T25G12.8	0	0	0	0	NA	NA		0	0	0	0	NA	NA		0	0	0	0	NA	NA		0	0	0	0	NA	NA		0	0	0	0	NA	NA		0	0	0	0	NA	NA
CTTCAAGTTCTATTGCCGGATAT	23H-RNA	F39E9.10	0	0	0.453323	0.346508	0.13511	NA		0	0	0.0819556	0	5.1312	NA		0	0	0.296821	0.189386	2.12861	NA		0	0	1.10668	1.47141	-2.73912	NA		0	0	0	0	NA	NA		0	0	0	0	NA	NA
CTTCCTTGACGACATATGGCCC	23H-RNA	other	0	0	0	0	NA	NA		0	0	0	0	NA	NA		0	0	0	0	NA	NA		0	0	0	0	NA	NA		0	0	0	0	NA	NA		1.10668	0	0	0	2.36895	NA
CTTCTACATCCGTAAGAGGAACC	23H-RNA	Y17D7C.3	0	0	0	0	NA	NA		0	0	0	0	NA	NA		0	0	0	0	NA	NA		0	0	0	0	NA	NA		0	0	0	0	NA	NA		0	0	0	0	NA	NA
CTTCTATCATTCTCGAATTCCC	23H-RNA	other	0	6.56118	0	0	5.38832	0.226109		0	0	0	0	NA	NA		0	0	0	0	NA	NA		0	0	0	0	NA	NA		0	0	0	0	NA	NA		0	0	0	0	NA	NA
CTTCTGATCCTAGATGAACAATG	23H-RNA	24F12A.4, H15N14.4, Y24F12A.3	0	0	0	0	NA	NA		0	0	0	0	NA	NA		0	0	0	0	NA	NA		0	0	0	0	NA	NA		0	0	0	0	NA	NA		0	0	0	0	NA	NA
CTTGAAAATACTAACCCGGTCA	23H-RNA	ZK1236.8	0	0	0	0	NA	NA		0	0	0	0	NA	NA		0	0	0	0	NA	NA		0	0	0	0	NA	NA		0	0	0	0	NA	NA		0	0	0	0	NA	NA
CTTTGAACGGCCCTTAAAACAC	23H-RNA	F31C3.9, rrn-3.1	0	0	0	0.346508	1.19984	NA		0	0	0.245867	0.275156	2.73931	NA		0	0	0	0	NA	NA		1.78343	0	0	1.47141	0.264364	NA		7.23671	0	1.11326	0	2.54272	NA		0	0	0	1.82041	-1.79774	NA
CTTTGCTCTGCGTCCGACACTTT	23H-RNA	VB0395L.1	0	0	0	0	NA	NA		0	0	0	0	NA	NA		0	0	0	0	NA	NA		0	0	0	0	NA	NA		0	0	0	0	NA	NA		0	0	0	0	NA	NA
CTTTTTTCGTTCTATGTGAGT	23H-RNA	F52D2.6	0	0	0	0	NA	NA		0	0	0	0	NA	NA		0	0	0	0	NA	NA		0	0	0	0	NA	NA		0	0	0	0	NA	NA		0	0	0	0	NA	NA
GAAAGACTAATCGAACCATCTA	23H-RNA	F31C3.9, rrn-3.1	0	3.28059	3.17326	0.693017	-0.530238	0.930957		0	0	0.491734	0.825468	1.40613	NA		0	0	1.03887	0.568159	0.403923	NA		4.45857	2.48933	2.21336	7.35703	-0.473279	0.843478		26.8792	1.41421	17.8122	2.27244	0.471832	0.774172		2.21336	1.75743	1.04547	0.910207	1.02425	NA
GAAGACACTTTCCAATTACCC	23H-RNA	GAAGACACTTTCCAATTACCC_Repeat, Y116A8C.48	0	0	0.453323	0	1.00363	NA		0	0	0	0	NA	NA		0	0	0	0	NA	NA		0	0	1.10668	0	-1.43789	NA		0	1.41421	0	0	2.21349	NA		0	0	0	0	NA	NA
GAAGAGCCGACATCGAAGGATCA	23H-RNA	F31C3.10, F31C3.9, rrn-3.1, rrn-3.56	0	0	0	0	NA	NA		0	0	0	0	NA	NA		0	0	0	0	NA	NA		0	0	0	0	NA	NA		0	0	0	0	NA	NA		0	0	0	0	NA	NA
GAATCAGAACACGGGGGCGACA	23H-RNA	hmg-1.1, Y48B6A.14	0	0	0	0	NA	NA		0	0	0	0.137578	4.75198	NA		0	0	0.14841	0	3.71683	NA		1.78343	1.24467	0	0	3.19558	NA		0	0	0	0	NA	NA		1.10668	0	0	0	2.36895	NA
GACAGTCCCCACTCTTCTCGA	23H-RNA	F31C3.7, F31C3.8, rrn-1.1, rrn-1.2	0	0	0	0	NA	NA		0	0	0	0	NA	NA		0	0	0	0	NA	NA		0	0	0	0	NA	NA		0	0	0	0	NA	NA		0	0	0	0	NA	NA
GACCAAGTCGTATGCAAGTGAT	23H-RNA	F31C3.10, F31C3.9, rrn-3.1, rrn-3.56	0	0	0	0	NA	NA		0	0	0	0	NA	NA		0	0	0	0	NA	NA		0	0	0	0	NA	NA		0	0	0	0	NA	NA		1.10668	0	0	0	2.36895	NA
GACGGGCGGTGTGTACAAAGGG	23H-RNA	F31C3.7, F31C3.8, rrn-1.1, rrn-1.2	0	0	0	0	NA	NA		0	0	0	0	NA	NA		0	0	0	0	NA	NA		0	0	0	0	NA	NA		0	0	0	0	NA	NA		0	0	0	0	NA	NA
GACGTACCAACTGGAGGCCCA	23H-RNA	F31C3.11, rrn-2.1	0	0	0	0	NA	NA		0	0	0	0	NA	NA		0	0	0	0	NA	NA		0	0	0	0	NA	NA		0	0	0	0	NA	NA		0	0	0	0	NA	NA
GACTGGACCAAACCGCGCGCT	23H-RNA	E01G4.5	0	0	0	0	NA	NA		0	0	0	0	NA	NA		0	0	0	0	NA	NA		0	0	0	0	NA	NA		0	0	0	0	NA	NA		0	0	0	0	NA	NA
GAGTCGATGAAAGTGGTGGTAT	23H-RNA	F31C3.9, rrn-3.1	0	0	0	0	NA	NA		0	0	0	0	NA	NA		0	0	0	0	NA	NA		0	0	0	0	NA	NA		0	0	0	0	NA	NA		0	0	0	0	NA	NA
GATAGTCTCAACAGATCGCAGT	23H-RNA	F31C3.10, F31C3.9, rrn-3.1, rrn-3.56	0	0	0	0	NA	NA		0	0	0	0	NA	NA		0	0	0	0	NA	NA		0	0	0	0	NA	NA		0	0	0	0	NA	NA		1.10668	0	0	0	2.36895	NA
GATGGTCGACAACCGACGAACA	23H-RNA	F19G12.10	0	0	0	0	NA	NA		0	8.61648	0	0	7.88001	NA		0	0	0	0	NA	NA		0	0	0	0	NA	NA		0	0	0	0	NA	NA		2.21336	0	0	0	3.16472	NA
GATTTAGCGCCCCGACATTGA	23H-RNA	F31C3.10, F31C3.9, rrn-3.1, rrn-3.56	0	0	0	0	NA	NA		0	0	0	0	NA	NA		0	0	0	0	NA	NA		0	0	0	0	NA	NA		0	0	0	0	NA	NA		0	0	0	0	NA	NA
GCAAGTGATTTAGCGCCCCGAC	23H-RNA	F31C3.10, F31C3.9, rrn-3.1, rrn-3.56	0	0	0	0	NA	NA		0	0	0	0	NA	NA		0	0	0	0	NA	NA		0	0	0	0	NA	NA		0	0	0	0	NA	NA		0	0	0	0	NA	NA
GCAGCCAAAGACTGATCGATTC	23H-RNA	F31C3.9, rrn-3.1	0	0	0	0	NA	NA		0	0	0	0	NA	NA		0	0	0	0	NA	NA		0	0	0	0	NA	NA		0	0	0	0	NA	NA		0	0	0.522735	0	-0.322129	NA
GCCCTTTGTACACACCGCCCGTC	23H-RNA	F31C3.7, F31C3.8, rrn-1.1, rrn-1.2	0	3.28059	0	0	4.31523	NA		0	0	0.0819556	0.137578	3.99304	NA		0	0	0	0.189386	3.53881	NA		0.891713	1.24467	0	2.20711	-0.123416	NA		3.10145	0	1.11326	1.13622	0.518849	NA		0	0	0	0	NA	NA
GCGCCCCGACATTGAACCAGAG	23H-RNA	F31C3.10, F31C3.9, rrn-3.1, rrn-3.56	0	0	0	0	NA	NA		0	0	0	0	NA	NA		0	0	0	0	NA	NA		0	0	0	0	NA	NA		0	0	0	0	NA	NA		0	0	0	0	NA	NA
GCGGAGATTCACTGGAGATTTG	23H-RNA	lin-5, T09A5.10	0	0	0	0	NA	NA		0	0	0	0	NA	NA		0	0	0	0	NA	NA		0	0	0	0	NA	NA		0	0	0	0	NA	NA		0	0	0	0	NA	NA
GCGTGCAGCCCCGGACATCTAA	23H-RNA	F31C3.7, F31C3.8, rrn-1.1, rrn-1.2	0	0	0	0	NA	NA		0	0	0	0	NA	NA		0	0	0	0	NA	NA		0	0	0	0	NA	NA		0	0	0	0	NA	NA		0	0	0	0	NA	NA
GGACCACCGAGACGCATGATA	23H-RNA	Y37E3.30	0	3.28059	0	0	4.31523	NA		0	0	0	0	NA	NA		0	0	0	0	NA	NA		0	0	0	0	NA	NA		0	0	0	0	NA	NA		1.10668	0	0	0	2.36895	NA
GGAGCTGGACGATGGATTCTT	23H-RNA	F55A4.9, rncs-1	0	0	0.453323	0	1.00363	NA		0	0	0	0	NA	NA		0	0	0.14841	0	3.71683	NA		0	0	0	0	NA	NA		0	0	0	0	NA	NA		0	0	0	0	NA	NA
GGGAGGAAAGCTGGGATTATCC	23H-RNA	Y37E3.30	0	0	0	0	NA	NA		0	0	0	0	NA	NA		0	0	0	0	NA	NA		0	0	0	0	NA	NA		0	0	0	0	NA	NA		0	0	0	0	NA	NA
GGGATAAGAGCTCGTCCGATGGCG	23H-RNA	T05E12.8	0	0	0	0	NA	NA		0	0	0	0	NA	NA		0	0	0	0	NA	NA		0	0	0	0	NA	NA		0	0	0	0	NA	NA		1.10668	0	0	0	2.36895	NA
GGGGTATATATGGGTTCTAAGATC	23H-RNA	Y116F11A.1	0	0	0	0	NA	NA		0	0	0	0	NA	NA		0	0	0	0	NA	NA		0	0	0	0	NA	NA		0	0	0	0	NA	NA		0	0	0	0	NA	NA
GGTGAGGTGTTGGTGCTGATGGCA	23H-RNA	C36A4.14	0	0	0	0	NA	NA		0	0	0	0	NA	NA		0	0	0	0	NA	NA		0	0	0	0	NA	NA		0	0	0	0	NA	NA		0	0	0	0	NA	NA
GTGCCTAACTTCTCGCTCATGA	23H-RNA	F31C3.9, rrn-3.1	0	0	0.453323	0	1.00363	NA		0	0	0.163911	0	4.36457	NA		0	0	0	0	NA	NA		0	0	0	0	NA	NA		8.27052	0	3.33979	0	1.23216	NA		0	0	0.522735	0	-0.322129	NA
GTGTAACAATCTATTTTTTCGT	23H-RNA	GTGTAACAATCTATTTTTTCGT_repeat	0	0	1.35997	0.346508	-0.954283	NA		0	0	0.163911	0.412734	2.6031	NA		0	0	0	0.378772	2.50616	NA		0	0	1.10668	0.735703	-2.24113	NA		0	0	0.556632	0	-0.70837	NA		0	0	0	1.82041	-1.79774	NA
GTTTCCAGCAGTGTCGTATGTCC	23H-RNA	F31C3.9, rrn-3.1	0	0	0	0.346508	1.19984	NA		0	0	0	0.275156	3.68651	NA		0	0	0.14841	0	3.71683	NA		0	2.48933	0	1.47141	0.635075	NA		10.3382	1.41421	7.23621	1.13622	0.454402	NA		0	0	0	0	NA	NA
TAAACGCAGCGGCGCGCGGAACC	23H-RNA	PALTA3	0	0	0	0	NA	NA		0	0	0	0	NA	NA		0	0	0	0	NA	NA		0	0	0	0	NA	NA		0	0	0	0	NA	NA		0	0	0	0	NA	NA
TAAATCTACTTAAATCAACGAAT	23H-RNA	mek-2, Y54E10BL.6, Y71F9AL.1	0	3.28059	0	0	4.31523	NA		0	0	0.0819556	0.137578	3.99304	NA		35.2081	6.66725	0.296821	0	7.07391	5.16e-05		0	0	0	0	NA	NA		0	2.82843	0.556632	0	1.90705	NA		2.21336	0	0	0	3.16472	NA
TACAACGTGCAACTAAGACACCC	23H-RNA	Y37E3.30	0	0	0	0	NA	NA		0	0	0	0	NA	NA		0	0	0	0	NA	NA		0	0	0	0	NA	NA		0	0	0	0	NA	NA		0	0	0	0	NA	NA
TACACGAGCTGCGTAAATCGAC	23H-RNA	other	0	0	0	0	NA	NA		0	0	0	0	NA	NA		0	0	0	0	NA	NA		0	0	0	0	NA	NA		0	0	0	0	NA	NA		0	0	0	0	NA	NA
TACCACCACTTTCATCGACTCTT	23H-RNA	F31C3.9, rrn-3.1	0	0	0	0	NA	NA		0	0	0.327822	0	3.38366	NA		0	6.66725	0.14841	0.189386	4.14488	NA		0	0	0	0.735703	-1.13933	NA		0	0	1.11326	0	-1.38496	NA		1.10668	0	0	0	2.36895	NA
TACGTCACAACTGTATTAAAAT	23H-RNA	TC8	0	0	0	0	NA	NA		0	0	0	0	NA	NA		0	0	0	0	NA	NA		0	0	0	0	NA	NA		4.13526	1.41421	0	0	4.2618	NA		0	0	0	0	NA	NA
TACGTTTACATGGAGGTCCCGC	23H-RNA	F39E9.29_region, F39E9.7	0	0	0	0	NA	NA		0	0	0	0	NA	NA		0	0	0	0	NA	NA		0	0	0	0	NA	NA		0	0	0	0	NA	NA		0	1.75743	0	0	2.70729	NA
TACGTTTACATGGAGGTCCCGCC	23H-RNA	F39E9.29_region, F39E9.7	0	0	0	0	NA	NA		0	0	0	0.137578	4.75198	NA		5.02973	0	0	0	6.49962	NA		0	0	0	0	NA	NA		0	0	0	0	NA	NA		0	0	0	0	NA	NA
TACTGTAGCGCTGGTGTCGATTT	23H-RNA	other	0	0	0	0	NA	NA		0	0	0	0	NA	NA		0	0	0	0	NA	NA		0	0	0	0	NA	NA		0	0	0	0	NA	NA		0	0	0	0	NA	NA
TAGAAGCCGCCGGGATGGACACC	23H-RNA	E01G4.5	0	6.56118	0	0	5.38832	0.226109		0	0	0	0	NA	NA		0	0	0	0	NA	NA		0	0	0	0	NA	NA		0	0	0	0	NA	NA		0	0	0	0	NA	NA
TAGGATAATGTCTGGAAATACGG	23H-RNA	B0281.4	0	0	0	0	NA	NA		0	0	0	0	NA	NA		0	0	0	0	NA	NA		0	0	0	0	NA	NA		0	0	0	0	NA	NA		0	0	0	0	NA	NA
TAGGGGAAAAGATGTTGAATG	23H-RNA	other	0	0	0	0	NA	NA		0	0	0	0	NA	NA		0	0	0	0	NA	NA		0	0	0	0	NA	NA		0	0	0	0	NA	NA		0	0	0	0	NA	NA
TATACCACTCTATCAGACTACT	23H-RNA	W04C9.8	0	0	0	0	NA	NA		0	0	0	0	NA	NA		0	0	0	0	NA	NA		0	0	0	0	NA	NA		0	0	0	0	NA	NA		0	0	0	0	NA	NA
TATCTACACTCTCTGTACCGG	23H-RNA	Unknown_RE2	0	0	0	0	NA	NA		0	0	0	0	NA	NA		0	0	0	0	NA	NA		0	0	0	0	NA	NA		0	0	0	0	NA	NA		0	0	0	0	NA	NA
TATTCCTGATGCGGCGCCGGCTC	23H-RNA	T05E12.8	0	3.28059	0	0	4.31523	NA		0	0	0	0	NA	NA		0	0	0	0	NA	NA		0	0	0	0	NA	NA		0	0	0	0	NA	NA		0	0	0	0	NA	NA
TATTGAAAATGTGGGATGACGC	23H-RNA	E01G4.7	0	0	0	0	NA	NA		0	0	0	0	NA	NA		0	0	0	0	NA	NA		0	0	0	0	NA	NA		0	0	0	0	NA	NA		0	0	0	0	NA	NA
TATTTGGAACAGAAGCAAGAGG	23H-RNA	F19B2.5	0	3.28059	0	0	4.31523	NA		0	0	0	0	NA	NA		0	0	0	0	NA	NA		0	0	0	0	NA	NA		0	0	0	0	NA	NA		0	0	0	0	NA	NA
TATTTTCCGACTTCTCATGAGCC	23H-RNA	other	0	0	0	0	NA	NA		0	0	0	0	NA	NA		0	0	0	0	NA	NA		0	0	0	0	NA	NA		0	0	0	0	NA	NA		0	0	0	0	NA	NA
TCAAAATTTGACGGTGATTTCAA	23H-RNA	PALTTAA1	0	0	0	0	NA	NA		0	0	0	0	NA	NA		0	0	0	0	NA	NA		0	0	0	0	NA	NA		0	0	0	0	NA	NA		0	0	0	0	NA	NA
TCAATTGTTGTGAAGCTAGCTCC	23H-RNA	W03D2.15	0	0	0	0	NA	NA		0	0	0	0	NA	NA		0	0	0	0	NA	NA		0	0	0	0	NA	NA		0	0	0	0	NA	NA		0	0	0	0	NA	NA
TCACGAGGGACGAGGAAAAGTG	23H-RNA	PAL5A	0	0	0	0	NA	NA		0	0	0	0	NA	NA		0	0	0	0	NA	NA		0	0	0	0	NA	NA		0	0	0	0	NA	NA		0	0	0	0	NA	NA
TCACGCATTTTTTGTAGATCAAA	23H-RNA	other, Y57A10A.1	0	0	0	0	NA	NA		0	0	0	0	NA	NA		0	0	0	0	NA	NA		0	0	0	0	NA	NA		0	0	0	0	NA	NA		0	0	0	0	NA	NA
TCACGTCATTATGTCACAATCCC	23H-RNA	F39F10.4	0	0	0	0	NA	NA		0	0	0	0	NA	NA		0	0	0	0	NA	NA		0	0	0	0	NA	NA		0	0	0	0	NA	NA		0	0	0	0	NA	NA
TCAGCGGTCTCGTTATGAAAATC	23H-RNA	PAL5A	0	6.56118	0	0	5.38832	0.226109		0	0	0	0	NA	NA		0	0	0	0	NA	NA		0	0	0	0	NA	NA		0	0	0	0	NA	NA		0	0	0	0	NA	NA
TCAGGCCGCCGACATCCTACGGG	23H-RNA	PALTA3	0	0	0	0	NA	NA		0	0	0	0	NA	NA		0	0	0	0	NA	NA		0	0	0	0	NA	NA		0	0	0	0	NA	NA		0	0	0	0	NA	NA
TCAGGCCGCCGACATCTCACGGG	23H-RNA	PALTA3	0	0	0	0	NA	NA		0	0	0	0	NA	NA		0	0	0	0	NA	NA		0	0	0	0	NA	NA		0	0	0	0	NA	NA		0	0	0	0	NA	NA
TCAGGCCGCCGACATCTCATGGA	23H-RNA	Y105C5B.11	0	0	0	0	NA	NA		0	0	0	0	NA	NA		0	0	0	0	NA	NA		0	0	0	0	NA	NA		0	0	0	0	NA	NA		0	0	0	0	NA	NA
TCATCAGCTCCATCAACACCACCA	23H-RNA	C36A4.14	0	0	0	0	NA	NA		0	0	0	0	NA	NA		0	0	0	0	NA	NA		0	0	0	0	NA	NA		0	0	0	0	NA	NA		0	0	0	0	NA	NA
TCATCTAAGGCTAAATATCGA	23H-RNA	F31C3.9, rrn-3.1	0	0	0	0	NA	NA		0	0	0.0819556	0	5.1312	NA		0	0	0.14841	0	3.71683	NA		1.78343	1.24467	1.10668	0.735703	0.746996	NA		6.20289	0	1.66989	0	1.78191	NA		0	0	0	0	NA	NA
TCCCGCAATTCTCGTAGATCAAA	23H-RNA	other	0	0	0	0	NA	NA		0	0	0	0	NA	NA		0	0	0	0	NA	NA		0	0	0	0	NA	NA		0	0	0	0	NA	NA		0	0	0	0	NA	NA
TCCCGCATTTTTGTAGATCACA	23H-RNA	CELE14B	0	0	0	0	NA	NA		0	0	0	0	NA	NA		0	0	0	0	NA	NA		0	0	0	0	NA	NA		0	0	0	0	NA	NA		0	0	0	0	NA	NA
TCCCGCATTTTTTGTAGATCAA	23H-RNA	CELE14B	0	0	0	0	NA	NA		0	0	0	0	NA	NA		0	0	0	0	NA	NA		0	0	0	0	NA	NA		0	0	0	0	NA	NA		0	0	0	0	NA	NA
TCCCGCATTTTTTGTAGATCAAA	23H-RNA	CELE14B	0	0	0	0	NA	NA		0	0	0.0819556	0	5.1312	NA		10.0595	0	0	0	7.39502	NA		0	0	0	0.735703	-1.13933	NA		0	0	0	0	NA	NA		0	0	0	0	NA	NA
TCCCGCATTTTTTGTAGATCACA	23H-RNA	CELE14B	0	0	0	0	NA	NA		0	0	0	0	NA	NA		0	0	0	0	NA	NA		0	0	0	0	NA	NA		0	0	0	0	NA	NA		0	0	0	0	NA	NA
TCCCGCATTTTTTGTAGATCAGA	23H-RNA	CELE14B	0	0	0	0	NA	NA		0	0	0	0	NA	NA		0	0	0	0	NA	NA		0	0	0	0	NA	NA		0	0	0	0	NA	NA		0	0	0	0	NA	NA
TCCCTGCCCTTTGTACACACCG	23H-RNA	F31C3.7, F31C3.8, rrn-1.1, rrn-1.2	0	0	0	0	NA	NA		10.3577	0	0.163911	0.137578	4.95695	NA		0	0	0.296821	0.378772	1.65828	NA		0.891713	1.24467	0	1.47141	0.449139	NA		11.372	0	5.00968	1.13622	0.862619	NA		0	1.75743	0	0	2.70729	NA
TCCGAACAAAAGAGTAACTATT	23H-RNA	other	0	0	0	0	NA	NA		0	0	0	0	NA	NA		0	0	0	0	NA	NA		0	0	0	0	NA	NA		0	0	0	0	NA	NA		0	0	0	0	NA	NA
TCCGATTTCTGCCCCCCAAAAT	23H-RNA	PAL8C	0	0	0	0	NA	NA		0	0	0	0	NA	NA		0	0	0	0	NA	NA		0	0	0	0	NA	NA		0	0	0	0	NA	NA		0	0	0	0	NA	NA
TCCGCGCGCCGCTACGTTTAACT	23H-RNA	other, Y105C5A.15	0	0	0	0	NA	NA		0	0	0	0	NA	NA		0	0	0	0	NA	NA		0	0	0	0	NA	NA		0	0	0	0	NA	NA		0	0	0	0	NA	NA
TCCGCGCGCCGCTATGTTTAACTT	23H-RNA	PALTA3	0	3.28059	0	0	4.31523	NA		0	0	0	0	NA	NA		0	0	0	0	NA	NA		0	0	0	0	NA	NA		0	0	0	0	NA	NA		0	0	0	0	NA	NA
TCCGGTTCAGAGCAGATGACAA	23H-RNA	Y17D7C.3	0	0	0	0	NA	NA		0	0	0	0	NA	NA		0	0	0	0	NA	NA		0	0	0	0	NA	NA		0	0	0	0	NA	NA		0	0	0	0	NA	NA
TCCGGTTCAGAGCAGATGACAAC	23H-RNA	Y17D7C.3	0	0	0	0	NA	NA		0	0	0	0	NA	NA		0	0	0	0	NA	NA		0	0	0	0	NA	NA		0	0	0	0	NA	NA		0	0	0	0	NA	NA
TCCGTCAGTCTTTTGTGAACAA	23H-RNA	dnj-12, F39B2.10	0	0	0	0	NA	NA		0	0	0	0	NA	NA		0	0	0	0	NA	NA		0	0	0	0	NA	NA		0	0	0	0	NA	NA		0	0	0	0	NA	NA
TCCTCAGCCTCACTTAAACTCTT	23H-RNA	M4.2, puf-4	0	0	0	0	NA	NA		0	0	0	0	NA	NA		0	0	0	0	NA	NA		0	0	0	0	NA	NA		0	0	0	0	NA	NA		0	0	0	0	NA	NA
TCCTCGGTCTTGACGAAATCCC	23H-RNA	C36A4.14	0	0	0	0	NA	NA		0	0	0	0	NA	NA		0	0	0	0	NA	NA		0	0	0	0	NA	NA		0	0	0	0	NA	NA		0	0	0	0	NA	NA
TCGCGACCAGCCCTGCGTCTTGC	23H-RNA	Y57G11C.51	0	0	0	0	NA	NA		0	0	0	0	NA	NA		0	0	0	0	NA	NA		0	0	0	0	NA	NA		0	0	0	0	NA	NA		0	0	0	0	NA	NA
TCGGGGACCAACCAATATCAGGT	23H-RNA	C34G6.1, H05C05.2, hpo-27	0	0	0	0	NA	NA		0	0	0	0	NA	NA		0	0	0	0	NA	NA		0	0	0	0	NA	NA		0	0	0	0	NA	NA		0	0	0	0	NA	NA
TCGGGGGATGTCCAATTGGGGG	23H-RNA	DNA-8-1	0	0	0	0	NA	NA		0	0	0	0	NA	NA		0	0	0	0	NA	NA		0	0	0	0	NA	NA		0	0	0	0	NA	NA		0	0	0	0	NA	NA
TCTCGTTCCAATTCAACTCCAGA	23H-RNA	T05E12.10	0	3.28059	0	0	4.31523	NA		0	0	0	0	NA	NA		0	0	0	0	NA	NA		0	0	0	0	NA	NA		0	0	0	0	NA	NA		0	0	0	0	NA	NA
TCTCTCTTCTCGGCTCTTCGAGC	23H-RNA	ChrIII_hairpin1	0	0	0	0	NA	NA		0	0	0	0	NA	NA		0	0	0	0	NA	NA		0	0	0	0	NA	NA		0	0	0	0	NA	NA		0	0	0	0	NA	NA
TCTGCGGAAGTGGTCTTCTACC	23H-RNA	Y37E3.30	0	3.28059	0	0	4.31523	NA		0	0	0	0	NA	NA		0	0	0	0	NA	NA		0	0	0	0	NA	NA		0	0	0	0	NA	NA		0	0	0	0	NA	NA
TCTGTCACTCTCTAACTATCTAC	23H-RNA	Unknown_RE2	0	0	0	0	NA	NA		0	0	0	0	NA	NA		0	0	0	0	NA	NA		0	0	0	0	NA	NA		0	0	0	0	NA	NA		0	0	0	0	NA	NA
TGAGATGTCGGCGGCCTGATA	23H-RNA	PALTA3	0	0	0	0	NA	NA		0	0	0	0	NA	NA		0	0	0	0	NA	NA		0	0	0	0	NA	NA		0	0	0	0	NA	NA		0	0	0	0	NA	NA
TGAGTGGCGAAAATCGGAAATT	23H-RNA	other	0	0	0	0	NA	NA		0	0	0	0	NA	NA		0	0	0	0	NA	NA		0	0	0	0	NA	NA		0	0	0	0	NA	NA		0	0	0	0	NA	NA
TGATCTACAAAAAATGCGGGAAC	23H-RNA	CELE14B	0	0	0	0	NA	NA		0	0	0	0	NA	NA		0	0	0	0	NA	NA		0	0	0	0	NA	NA		0	0	0	0	NA	NA		0	0	0	0	NA	NA
TGATCTACCTGTTGAACTTGACC	23H-RNA	other	0	3.28059	0	0	4.31523	NA		0	0	0	0	NA	NA		0	0	0	0	NA	NA		0	0	0	0	NA	NA		0	0	0	0	NA	NA		0	0	0	0	NA	NA
TGATCTCTCTTCTCGGCTCTTCG	23H-RNA	ChrIII_hairpin1	0	3.28059	0	0	4.31523	NA		0	0	0	0	NA	NA		0	0	0	0	NA	NA		0	0	0	0	NA	NA		0	0	0	0	NA	NA		0	0	0	0	NA	NA
TGATGGCGTGGAAGAAGTTGA	23H-RNA	Y57G11C.1145_hairpin	0	0	0	0	NA	NA		0	0	0	0	NA	NA		0	0	0	0	NA	NA		0	0	0	0	NA	NA		0	0	0	0	NA	NA		0	0	0	0	NA	NA
TGATTACGTCCCTGCCCTTTGT	23H-RNA	F31C3.7, F31C3.8, rrn-1.1, rrn-1.2	0	0	0	0	NA	NA		0	0	0.983467	0.68789	1.05169	NA		0	0	0.742051	0.946931	0.336123	NA		1.78343	2.48933	1.10668	4.41422	-0.418534	0.891722		13.4396	1.41421	20.0387	3.40866	-0.657605	0.686465		0	1.75743	0.522735	0	1.34235	NA
TGCACAGACTGAGCATTTTCCCCC	23H-RNA	other	0	3.28059	0	0	4.31523	NA		0	0	0	0	NA	NA		0	0	0	0	NA	NA		0	0	0	0	NA	NA		0	0	0	0	NA	NA		0	0	0	0	NA	NA
TGCGACGGATCAGTGTTGCCACT	23H-RNA	T05E12.8	0	0	0	0	NA	NA		0	0	0	0	NA	NA		0	0	0	0	NA	NA		0	0	0	0	NA	NA		0	0	0	0	NA	NA		0	0	0	0	NA	NA
TGCGGAGAAATGACGAGAAAT	23H-RNA	other	0	0	0	0	NA	NA		0	0	0	0	NA	NA		0	0	0	0	NA	NA		0	0	0	0	NA	NA		1.03382	0	0	0	1.98461	NA		0	0	0	0	NA	NA
TGCGTCTCTCCCCCTCCCACACT	23H-RNA	other	0	0	0	0	NA	NA		0	0	0	0	NA	NA		0	0	0	0	NA	NA		0	0	0	0	NA	NA		0	0	0	0	NA	NA		0	0	0	0	NA	NA
TGGAAATATGACGGCTGCTACGA	23H-RNA	F53H1.4	0	0	0	0	NA	NA		0	0	0	0	NA	NA		0	0	0	0	NA	NA		0	0	0	0	NA	NA		0	0	0	0	NA	NA		0	0	0	0	NA	NA
TGGAGTTGAATTGGAACGAGATC	23H-RNA	T05E12.10	0	0	0	0	NA	NA		0	0	0	0	NA	NA		0	0	0	0	NA	NA		0	0	0	0	NA	NA		0	0	0	0	NA	NA		0	0	0	0	NA	NA
TGGCCAAACTGGATTGACGAG	23H-RNA	F55A4.9, rncs-1	0	3.28059	0	0	4.31523	NA		0	0	0	0	NA	NA		0	0	0	0	NA	NA		0	0	0	0	NA	NA		0	0	0	0	NA	NA		0	0	0	0	NA	NA
TGGCGTGTACTGCAGAAAACCC	23H-RNA	Y105C5A.15	0	0	0	0	NA	NA		0	0	0.0819556	0	5.1312	NA		0	0	0	0	NA	NA		0	0	0	0	NA	NA		0	0	0	0	NA	NA		0	0	0	0	NA	NA
TGGGAATGCAGAAGAAAAGAGGG	23H-RNA	other	0	0	0	0	NA	NA		0	0	0	0	NA	NA		0	0	0	0	NA	NA		0	0	0	0	NA	NA		0	0	0	0	NA	NA		0	0	0	0	NA	NA
TGGGCGGGGCCAATCCGGAATGC	23H-RNA	Y24F12A.3, Y24F12A.4	0	0	0	0	NA	NA		0	0	0	0	NA	NA		0	0	0	0	NA	NA		0	0	0	0	NA	NA		0	0	0	0	NA	NA		0	0	0	0	NA	NA
TGTAACAACTCACCTGCCGAAT	23H-RNA	F31C3.9, rrn-3.1	0	3.28059	1.35997	0.693017	0.408529	NA		0	0	1.39324	1.2382	0.399788	NA		0	0	1.92933	0.568159	-0.23345	NA		1.78343	13.6913	1.10668	23.5425	-0.729034	0.711771		37.2174	9.89949	36.7377	5.6811	0.129026	0.921296		2.21336	0	1.56821	2.73062	-0.836767	NA
TGTAATTCTGCAGCCACTTCCGA	23H-RNA	W03D2.15	0	0	0	0	NA	NA		0	0	0	0	NA	NA		0	0	0	0	NA	NA		0	0	0	0	NA	NA		0	0	0	0	NA	NA		0	0	0	0	NA	NA
TGTAGATCAAACCGTCATGGG	23H-RNA	CELE14B	0	0	0	0	NA	NA		0	0	0	0	NA	NA		0	0	0	0	NA	NA		0	0	0	0	NA	NA		0	0	0	0	NA	NA		0	0	0	0	NA	NA
TGTCTTCCTTTTGTTTCTCTTCC	23H-RNA	F19B2.5	0	3.28059	0	0	4.31523	NA		0	0	0	0	NA	NA		0	0	0	0	NA	NA		0	0	0	0	NA	NA		0	0	0	0	NA	NA		0	0	0	0	NA	NA
TGTGAACAGCGAGACACTATTCC	23H-RNA	Y71A12B.2, Y71A12B.3	0	0	0	0	NA	NA		0	0	0	0	NA	NA		0	0	0	0	NA	NA		0	0	0	0	NA	NA		0	0	0	0	NA	NA		0	0	0	0	NA	NA
TGTGAAGACATCTCAGAAACAT	23H-RNA	F43E2.6	0	0	0	0	NA	NA		0	0	0	0	NA	NA		0	0	0	0	NA	NA		0	0	0	0	NA	NA		0	0	0	0	NA	NA		0	0	0	0	NA	NA
TGTGAAGACATCTCAGAAACATCG	23H-RNA	F43E2.6	0	0	0	0	NA	NA		0	0	0.0819556	0	5.1312	NA		0	0	0	0	NA	NA		0	0	0	0	NA	NA		0	0	0	0	NA	NA		0	0	0	0	NA	NA
TGTGGCCCGCGGTAATTACATCC	23H-RNA	F41F3.10	0	0	0	0	NA	NA		0	0	0	0	NA	NA		0	0	0	0	NA	NA		0	0	0	0	NA	NA		0	0	0	0	NA	NA		0	0	0	0	NA	NA
TGTGGGCCCTCGCACTGTCTACC	23H-RNA	E01G4.5	0	0	0	0	NA	NA		0	0	0	0	NA	NA		0	0	0	0	NA	NA		0	0	0	0	NA	NA		0	0	0	0	NA	NA		0	0	0	0	NA	NA
TGTGGGCGGGGCCAATCCGGAA	23H-RNA	H15N14.4, H37A05.4, Y24F12A.3, Y24F12A.4	0	0	0	0	NA	NA		0	0	0	0	NA	NA		0	0	0	0	NA	NA		0	0	0	0	NA	NA		0	0	0	0	NA	NA		0	0	0	0	NA	NA
TGTGTTCGTCCTCCATACATTG	23H-RNA	C36A4.14	0	0	0.453323	0	1.00363	NA		0	0	0	0	NA	NA		0	0	0	0	NA	NA		0	0	0	0	NA	NA		0	0	0	0	NA	NA		0	0	0	0	NA	NA
TGTTCCCTGTGGAGACCCTCACC	23H-RNA	other, Y116A8B.1	0	0	0	0	NA	NA		0	0	0	0	NA	NA		0	0	0	0	NA	NA		0	0	0	0	NA	NA		0	0	0	0	NA	NA		0	0	0	0	NA	NA
TGTTCGTCCTCCATACATTGCC	23H-RNA	C36A4.14	0	0	0	0	NA	NA		10.3577	0	0	0	8.01412	NA		0	0	0	0	NA	NA		0	0	0	0	NA	NA		0	0	0	0	NA	NA		0	0	0	0	NA	NA
TGTTTCTGAGATGTCTTCACAAT	23H-RNA	F43E2.6	0	3.28059	0	0	4.31523	NA		0	8.61648	0	0	7.88001	NA		10.0595	6.66725	0	0	8.104	0.000584081		0	0	0	0	NA	NA		0	0	0	0	NA	NA		0	0	0	0.910207	-0.728152	NA
TTACCTATCGGCTTTAAATGT	23H-RNA	PALTTAA3	0	0	0	0	NA	NA		0	8.61648	0.163911	0.137578	4.93726	NA		15.0892	0	0	0	7.97265	NA		0	0	0	1.47141	-1.95658	NA		3.10145	0	0.556632	1.13622	0.972377	NA		0	0	0	1.82041	-1.79774	NA
TTAGATACCGTACCCCGAAAAC	23H-RNA	ChrIII_hairpin2	0	0	0	0	NA	NA		0	0	0	0	NA	NA		0	0	0	0	NA	NA		0	0	0	0	NA	NA		0	0	0	0	NA	NA		0	0	0	0	NA	NA
TTAGGATTCGTGGTTTTCACCC	23H-RNA	tRNA	0	3.28059	0.453323	0	2.73704	NA		0	0	0.245867	0.275156	2.73931	NA		0	0	0.296821	0.378772	1.65828	NA		0	0	0	0.735703	-1.13933	NA		5.16908	2.82843	1.11326	1.13622	1.84597	NA		2.21336	0	0.522735	0.910207	0.724519	NA
TTAGGTTTTCTGCAGTACACGC	23H-RNA	PALTA3	0	0	0	0	NA	NA		0	0	0	0	NA	NA		0	0	0	0	NA	NA		0	0	0	0	NA	NA		0	0	0	0	NA	NA		0	0	0	0	NA	NA
TTATCTAATCTCCATGTCACCC	23H-RNA	Y37E11B.2	0	0	0	0	NA	NA		0	0	0	0	NA	NA		0	0	0	0	NA	NA		0	0	0	0	NA	NA		0	0	0	0	NA	NA		0	0	0	0	NA	NA
TTCATTCACATCGGCTGCCATCC	23H-RNA	T05E12.8	0	0	0	0	NA	NA		0	0	0	0	NA	NA		0	0	0	0	NA	NA		0	0	0	0	NA	NA		0	0	0	0	NA	NA		0	0	0	0	NA	NA
TTCCCGCATTTTTTGTAGATC	23H-RNA	CELE14B	0	0	0	0	NA	NA		10.3577	25.8494	0	0	9.89767	1.22507e-07		30.1784	0	0.14841	0	7.56669	0.00476198		0	0	0	0	NA	NA		1.03382	0	0	0	1.98461	NA		0	0	0.522735	0	-0.322129	NA
TTCCCGCATTTTTTGTAGATCA	23H-RNA	CELE14B	0	0	0	0	NA	NA		0	0	0	0	NA	NA		0	0	0	0	NA	NA		0	0	1.10668	0	-1.43789	NA		1.03382	0	0	0	1.98461	NA		0	0	0	0	NA	NA
TTCCCTTTATGTCGCACTTGCGC	23H-RNA	T05E12.10	0	3.28059	0	0	4.31523	NA		0	0	0	0	NA	NA		0	0	0	0	NA	NA		0	0	0	0	NA	NA		0	0	0	0	NA	NA		0	0	0	0	NA	NA
TTCCGCGCGCCGCTATGTTTA	23H-RNA	PALTA3	0	0	0	0	NA	NA		0	0	0	0	NA	NA		0	0	0	0	NA	NA		0	0	0	0	NA	NA		0	0	0	0	NA	NA		0	0	0	0	NA	NA
TTCCTCGTTTGGATATGTAGAAGA	23H-RNA	Y17D7C.3	0	0	0	0	NA	NA		0	0	0	0	NA	NA		0	0	0	0	NA	NA		0	0	0	0.735703	-1.13933	NA		0	0	0	0	NA	NA		0	0	0	0	NA	NA
TTCGCTCTCGATTCCGCATGCCG	23H-RNA	dnj-27_element	0	0	0	0	NA	NA		0	0	0	0	NA	NA		0	0	0	0	NA	NA		0	0	0	0	NA	NA		0	0	0	0	NA	NA		0	0	0	0	NA	NA
TTCGGACAGATGTGACACGGA	23H-RNA	PALTTAA3	0	0	0	0	NA	NA		0	0	0	0	NA	NA		0	0	0	0	NA	NA		0	0	0	0	NA	NA		0	0	0	0	NA	NA		0	0	0	0	NA	NA
TTCTAAGTCCCTTTGATGCTC	23H-RNA	K06B9.6	0	0	0	0	NA	NA		0	0	0	0	NA	NA		0	0	0	0	NA	NA		0	0	0	0	NA	NA		0	0	0	0	NA	NA		0	0	0	0	NA	NA
TTCTACATATCCAAACGAGGAAC	23H-RNA	Y17D7C.3	0	0	0	0	NA	NA		0	0	0	0	NA	NA		0	0	0	0	NA	NA		0	0	0	0	NA	NA		0	0	0	0	NA	NA		0	0	0	0	NA	NA
TTCTGTCATCACCCGCGGGGC	23H-RNA	dnj-27_element	0	0	0	0	NA	NA		0	0	0	0	NA	NA		0	0	0	0	NA	NA		0	0	0	0	NA	NA		0	0	0	0	NA	NA		0	0	0	0	NA	NA
TTGATCTCTATGCGACCCCACAC	23H-RNA	T05E12.10	0	3.28059	0	0	4.31523	NA		0	0	0	0	NA	NA		0	0	0	0	NA	NA		0	0	0	0	NA	NA		0	0	0	0	NA	NA		0	0	0	0	NA	NA
TTGCCAAATGGACGTACAGATC	23H-RNA	Y105C5A.14	0	0	0	0	NA	NA		0	0	0	0	NA	NA		0	0	0	0	NA	NA		0	0	0	0	NA	NA		0	0	0.556632	0	-0.70837	NA		0	0	0	0	NA	NA
TTGCTTTTTGATCCTTCGATGT	23H-RNA	F31C3.10, F31C3.9, rrn-3.1, rrn-3.56	0	0	1.35997	0	-0.622206	NA		0	0	0.491734	0.275156	2.17268	NA		0	0	0.593641	0.378772	1.12907	NA		3.56685	1.24467	0	1.47141	1.62447	NA		33.0821	5.65685	38.9642	3.40866	-0.134089	0.962054		1.10668	3.51486	1.56821	0	1.43012	NA
TTGTCTTCCTTTTGTTTCTCTTC	23H-RNA	F19B2.5	0	3.28059	0	0	4.31523	NA		0	0	0	0	NA	NA		0	0	0	0	NA	NA		0	0	0	0	NA	NA		0	0	0	0	NA	NA		0	0	0	0	NA	NA
TTGTGTTCGTCCTCCATACATTG	23H-RNA	C36A4.14	0	0	0	0	NA	NA		0	0	0.0819556	0	5.1312	NA		0	0	0	0	NA	NA		0	0	0	0	NA	NA		0	0	0	0	NA	NA		0	0	0	0	NA	NA
TTTAAAGTCGTAGAAGTGGGAAA	23H-RNA	NPALTA1	0	0	0	0	NA	NA		0	0	0	0	NA	NA		0	0	0	0	NA	NA		0	0	0	0	NA	NA		0	0	0	0	NA	NA		0	0	0	0	NA	NA
TTTCAACACGGCGGGAGGAAAGC	23H-RNA	Y37E3.30	0	0	0	0	NA	NA		0	0	0	0	NA	NA		0	0	0.14841	0	3.71683	NA		0	0	0	0	NA	NA		0	0	0	0	NA	NA		0	0	0	0	NA	NA
TTTCGTTCTTGGTGAAAAAAGTG	23H-RNA	E01G4.7	0	0	0	0	NA	NA		0	0	0	0	NA	NA		0	0	0	0	NA	NA		0	0	0	0	NA	NA		0	0	0	0	NA	NA		0	0	0	0	NA	NA
TTTCTGCAGTACACGCCACGC	23H-RNA	PALTA3	0	0	0	0	NA	NA		0	0	0	0	NA	NA		0	0	0	0	NA	NA		0	0	0	0	NA	NA		0	0	0	0	NA	NA		0	0	0	0	NA	NA
TTTGATACCTGGACTCTTTCC	23H-RNA	E01G4.7	0	0	0	0	NA	NA		0	0	0	0	NA	NA		0	0	0	0	NA	NA		0	0	0	0	NA	NA		0	0	0	0	NA	NA		0	1.75743	0	0	2.70729	NA
TTTGATCTACCTGTTGAACTTGA	23H-RNA	other	0	0	0	0	NA	NA		0	0	0	0	NA	NA		0	0	0	0	NA	NA		0	0	0	0	NA	NA		0	0	0	0	NA	NA		0	0	0	0	NA	NA
TTTGTTTCTCTTCCTCTTGCTTC	23H-RNA	F19B2.5	0	0	0	0	NA	NA		0	0	0	0	NA	NA		0	0	0	0	NA	NA		0	0	0	0	NA	NA		0	0	0	0	NA	NA		0	0	0	0	NA	NA
TTTTGAAAGTTCTACCGTTCTC	23H-RNA	F34D6.11, linc-12	0	3.28059	0	0	4.31523	NA		0	0	0	0	NA	NA		0	0	0	0	NA	NA		0	0	0	0	NA	NA		0	0	0	0	NA	NA		0	0	0	0	NA	NA
TTTTGCCTTTTCCCCGTGAGT	23H-RNA	PALTA3	0	0	0	0	NA	NA		0	0	0	0	NA	NA		0	0	0	0	NA	NA		0	0	0	0	NA	NA		0	0	0	0	NA	NA		0	0	0	0	NA	NA
TTTTTGATTCAAAAACTCGGAT	23H-RNA	mdt-8, Y62F5A.1	0	0	0	0	NA	NA		0	17.233	0	0	8.79786	0.164902		0	0	0	0	NA	NA		0	2.48933	0	1.47141	0.635075	NA		0	1.41421	0	0	2.21349	NA		0	0	0	0	NA	NA
