# Supplementary material for: A low-abundance class of Dicer-dependent siRNAs produced from a variety of features in C. elegans
Source: HighWire-hosted journal article supplement (doi:10.1101/gr.279083.124), 2024-12-01
Supplement: Supplemental_Table_S10.xlsx [file Supplemental_Table_S10.xlsx]

## Sheet: Table S10
Supplemental Table S10. Geometric mean-normalized 23H-RNA sRNA-seq read counts from ALG-1 and ALG-2 co-IPs following control (L4440) or rde-1 RNAi.
Feature ID	Classifier	Feature Name		ALG-1 L4440 IP rep 1	ALG-1 L4440 IP rep 2	ALG-1 L4440 input rep 1	ALG-1 L4440 input rep 2	ALG-1 rde-1 IP rep 1	ALG-1 rde-1 IP rep 2	ALG-1 rde-1 input rep 1	ALG-1 rde-1 input rep 2		ALG-2 L4440 IP rep 1	ALG-2 L4440 IP rep 2	ALG-2 L4440 input rep 1	ALG-2 L4440 input rep 2	ALG-2 rde-1 IP rep 1	ALG-2 rde-1 IP rep 2	ALG-2 rde-1 input rep 1	ALG-2 rde-1 input rep 2
TTTGCCGATGTTTCTGAGATGTC	23H-RNA	F43E2.6		8825.55	12536.4	1170.09	963.043	105364	88359.1	1631.12	1212		2820	5051.64	817.126	728.98	20535.4	30153	979.954	900.863
TTTGCCGATGTTTCTGAGATGTCT	23H-RNA	F43E2.6		2160.28	2412.62	76.7874	61.0859	23262.9	19347.6	231.987	201.611		1550.81	2955.03	45.2883	44.1708	14305.1	22936.4	170.456	178.767
TTAAACGGTAAGGGCCGGCTGG	23H-RNA	mir-5592		1349.82	1833.59	13.5507	13.2562	1849.88	3516.42	18.0202	11.8845		1670.4	1930.13	17.0315	18.5127	1720.05	2313.87	18.7167	15.6782
TTAAACGGTAAGGGCCGGCTG	23H-RNA	mir-5592		617.621	1139.68	11.1847	10.7483	850.572	1403.67	13.2781	6.15445		2098.61	3319.2	17.4186	16.7264	2546.62	2843.06	17.157	23.7875
TATTAAACGGTAAGGGCCGGCT	23H-RNA	mir-5592		606.442	1052.36	33.7692	29.3786	1784.81	1468.79	30.3499	22.2834		686.676	1217.39	22.4506	20.2991	3607.32	1815.82	30.9717	34.2396
ATTAAACGGTAAGGGCCGGCTGG	23H-RNA	mir-5592		553.344	900.712	6.66781	6.44895	2128.76	4138.67	17.4512	10.8233		69.4392	62.4301	6.58036	7.95723	253.229	300.907	13.1463	18.3813
CATCTCAGAAACATCGGCAAATG	23H-RNA	F43E2.6		452.736	1130.48	120.881	92.9724	13743.9	8610.17	156.681	156.62		219.891	249.721	70.8356	62.1963	2436.73	2246.43	131.908	116.595
TGCCGATGTTTCTGAGATGTCT	23H-RNA	F43E2.6		433.173	519.288	17.6374	16.6598	1282.83	1338.56	21.2449	21.8589		119.59	176.885	12.9672	8.7692	191.116	378.728	14.0375	15.3177
TATTAAACGGTAAGGGCCGGCTG	23H-RNA	mir-5592		254.315	496.31	24.0902	17.7346	1431.56	2062.1	30.5396	18.8878		489.932	613.896	22.8377	22.2478	1786.94	2163.42	29.6348	32.4376
TATTAAACGGTAAGGGCCGGC	23H-RNA	mir-5592		251.52	418.188	23.4449	24.1836	701.838	484.774	27.6943	20.3734		385.773	874.022	21.87	18.3504	855.245	809.337	20.7221	16.9396
TTTGCCGATGTTTCTGAGATGT	23H-RNA	F43E2.6		248.725	330.874	128.624	123.247	1636.07	991.255	98.8268	104.838		270.041	244.518	106.641	106.854	912.58	1047.99	96.7031	93.5283
TGGAGTGGATGACGACGACGAT	23H-RNA	Y57G11C.1145_hairpin		243.136	234.369	7.31308	5.55326	260.284	311.124	6.63904	5.94223		19.2887	62.4301	5.8062	1.94871	38.2233	67.4448	4.23354	3.60417
TCCTTCGATGTCGGCTCTTCCT	23H-RNA	F31C3.10, F31C3.9, rrn-3.1, rrn-3.56		229.163	431.974	30.3278	63.2356	83.6629	86.8252	70.5635	74.0657		100.301	218.505	56.7072	44.0084	124.226	83.0089	82.2199	44.872
TGTATTAAACGGTAAGGGCCGGC	23H-RNA	mir-5592		220.779	349.256	220.468	204.575	3169.89	2358.75	225.727	159.379		165.882	197.695	199.927	176.358	707.13	793.773	172.461	182.011
ATTAAACGGTAAGGGCCGGCTG	23H-RNA	mir-5592		178.859	294.11	3.44145	3.22448	362.539	535.422	3.41436	3.39556		92.5855	145.67	5.22558	3.57264	119.448	134.89	6.23891	7.92918
TCCTTCGATGTCGGCTCTTCC	23H-RNA	F31C3.10, F31C3.9, rrn-3.1, rrn-3.56		134.144	193.01	58.2896	123.247	83.6629	151.944	144.731	151.739		165.882	187.29	116.511	90.2902	133.781	103.761	157.087	83.6168
TTGCCGATGTTTCTGAGATGTCT	23H-RNA	F43E2.6		128.555	147.055	3.22636	3.76189	859.868	716.308	5.31123	5.94223		27.0041	104.05	2.12894	2.76067	109.892	249.027	4.23354	7.38856
TTAAACGGTAAGGGCCGGCTGGG	23H-RNA	mir-5592		120.171	174.628	2.15091	1.07483	460.146	629.483	2.65561	1.91		131.163	124.86	1.54832	1.62393	172.005	176.394	1.78254	1.08125
CATTTTTGGTAAGCAGAACTGGC	23H-RNA	F31C3.9, rrn-3.1		114.581	137.864	43.2332	17.7346	237.045	246.005	31.8674	15.7045		138.878	124.86	34.2566	21.111	90.7802	88.197	20.2764	19.1021
TCCTTCGATGTCGGCTCTTCCTAT	23H-RNA	F31C3.10, F31C3.9, rrn-3.1, rrn-3.56		106.197	183.819	10.3244	7.70291	51.1273	28.9417	11.0018	6.36668		38.5773	62.4301	7.7416	5.68374	23.8895	31.1284	10.2496	5.04584
TAGACGGTGTGGGTCAACGAGC	23H-RNA	T05E12.8		97.8133	91.9093	0.860363	3.04534	148.734	180.886	3.03499	2.12223		54.0082	72.8352	1.74186	0.324785	23.8895	88.197	1.33691	0.540626
AAGACCCTGTTGAGCTTGACTC	23H-RNA	F31C3.9, rrn-3.1		95.0186	133.269	13.5507	9.13602	92.9587	86.8252	14.6059	8.27668		119.59	114.455	11.9995	6.98288	57.3349	57.0686	7.13018	9.73127
ATTGTGAAGACATCTCAGAAAC	23H-RNA	F43E2.6		81.0453	202.201	7.52817	5.55326	297.468	94.0607	7.01841	5.94223		88.7278	192.493	3.29018	2.76067	95.5582	140.078	5.79327	5.58647
AGTGGAGTGGATGACGACGACGA	23H-RNA	Y57G11C.1145_hairpin		78.2506	128.673	78.5081	66.8183	1984.67	2597.52	92.7568	85.9501		73.2969	150.873	53.0299	39.7862	310.564	1042.8	72.6387	76.0481
TCAATGACGGAGTCGAGATCGAC	23H-RNA	Y37E11B.2		78.2506	82.7184	3.01127	4.83671	106.903	195.357	5.31123	3.39556		19.2887	72.8352	0.58062	1.62393	43.0012	108.949	1.55973	0.901043
ATCGGACGAGCTCTTATCCCCT	23H-RNA	T05E12.8		67.072	82.7184	0.860363	0.71655	218.453	173.65	1.70718	0.424445		7.71546	5.20251	0.58062	0.64957	9.55582	0	0.222818	0
CACTAATAGGGAACGTGAGCT	23H-RNA	F31C3.10, F31C3.9, rrn-3.1, rrn-3.56		64.2773	50.5501	10.5394	10.0317	74.367	108.532	8.34622	5.51779		96.4433	41.6201	13.3543	8.7692	76.4465	41.5045	15.5973	13.6959
CGGCCCTTACCGTTTAATACA	23H-RNA	mir-5592		64.2773	87.3139	4.732	4.47844	83.6629	57.8835	2.65561	2.97112		57.866	88.4427	3.48372	1.94871	95.5582	124.513	2.89664	6.48751
TTTTGCTGATCTCTCTTCTCGG	23H-RNA	ChrIII_hairpin1		61.4826	78.1229	2.58109	2.50793	199.861	108.532	3.03499	1.91		27.0041	36.4176	1.16124	0.487178	9.55582	20.7522	2.22818	1.44167
TTTGCCGATGTTTCTGAGATG	23H-RNA	F43E2.6		58.688	82.7184	40.222	29.3786	246.341	535.422	28.6427	25.4667		57.866	67.6326	28.6439	32.9657	215.006	285.343	21.3905	21.4448
AGTGGAGTGGATGACGACGACG	23H-RNA	Y57G11C.1145_hairpin, Y57G11C.51		55.8933	73.5275	32.2636	28.662	687.895	1186.61	27.1252	27.5889		42.435	46.8226	22.8377	19.3247	119.448	207.522	20.0536	25.049
TGGAGTGGATGACGACGACGA	23H-RNA	Y57G11C.1145_hairpin		55.8933	45.9547	6.8829	6.44895	130.142	65.1189	4.93186	6.36668		7.71546	5.20251	6.96744	4.3846	0	10.3761	5.12482	5.76668
AACCGGACCCTGCCTCTTCATC	23H-RNA	Y57G11C.1145_hairpin		53.0986	41.3592	0.860363	0.71655	120.846	144.709	1.89687	1.48556		19.2887	0	0.77416	0.811963	14.3337	41.5045	0.668454	0.901043
CACGATCAGAAGGGATGTCACT	23H-RNA	E01G4.7		50.304	68.932	0.430181	0.71655	218.453	246.005	2.08655	1.27334		0	20.81	0.19354	0.162393	4.77791	0	0.668454	1.08125
TCCGGTTCAGAGCAGATGACA	23H-RNA	Y17D7C.3		50.304	32.1683	2.366	1.25396	92.9587	86.8252	1.51749	1.69778		3.85773	46.8226	1.54832	2.92307	47.7791	51.8806	0.891272	2.34271
TCGAGAAATGACGAGAAATTCAC	23H-RNA	Unknown_RE4		50.304	59.7411	3.01127	1.07483	120.846	108.532	0.948434	1.69778		131.163	124.86	1.54832	1.94871	181.56	114.137	2.22818	2.70313
ATTAAACGGTAAGGGCCGGCT	23H-RNA	mir-5592		47.5093	101.1	0.430181	0.537413	190.565	267.711	0.758747	0.84889		7.71546	31.2151	1.16124	0.974355	14.3337	31.1284	1.78254	0.901043
TGCCGATGTTTCTGAGATGTCTT	23H-RNA	F43E2.6		47.5093	41.3592	23.4449	15.7641	673.951	687.366	27.3149	21.6467		0	0	12.5801	11.2051	33.4454	20.7522	12.7006	15.6782
TTGCCGATGTTTCTGAGATGTC	23H-RNA	F43E2.6		44.7147	59.7411	2.15091	2.68706	241.693	166.415	1.70718	1.91		3.85773	26.0126	0.77416	0.974355	66.8907	72.6328	3.34227	2.88334
TTGTGAAGACATCTCAGAAAC	23H-RNA	F43E2.6		44.7147	32.1683	1.93582	1.25396	69.7191	57.8835	0.758747	2.12223		73.2969	41.6201	1.54832	1.29914	14.3337	67.4448	1.11409	0.720835
AATTGTGAAGACATCTCAGAAAC	23H-RNA	F43E2.6		36.3307	87.3139	4.732	3.94103	311.412	137.473	4.93186	6.15445		46.2928	119.658	3.67726	4.54699	176.783	233.463	5.57045	6.12709
GAGTGGGGACTGTCGCTTCGA	23H-RNA	F31C3.7, F31C3.8, rrn-1.1, rrn-1.2		33.536	41.3592	13.9809	22.9296	32.5356	14.4709	19.9171	15.9167		54.0082	41.6201	47.9979	41.2477	23.8895	46.6925	41.8898	38.024
CCGGCCCTTACCGTTTAATACA	23H-RNA	mir-5592		30.7413	64.3365	0.430181	0.895688	69.7191	72.3544	0.758747	0.636668		23.1464	36.4176	1.54832	0.487178	66.8907	62.2567	1.55973	0.180209
CGCGCGCCGCTATGTTTAACT	23H-RNA	PALTA3		30.7413	27.5728	0.430181	0.358275	106.903	57.8835	0.56906	0.424445		15.4309	26.0126	0.58062	0	9.55582	36.3164	0.891272	0.180209
TTTGGCATCGCCCGTGGTATTCC	23H-RNA	T05E12.8		30.7413	36.7637	2.58109	2.32879	41.8314	101.296	1.32781	1.27334		3.85773	31.2151	0.77416	0.162393	33.4454	31.1284	0.891272	0.720835
TGTAACAACTCACCTGCCGAAT	23H-RNA	F31C3.9, rrn-3.1		27.9467	50.5501	2.79618	1.61224	9.29587	28.9417	3.03499	1.06111		23.1464	52.0251	2.51602	3.24785	19.1116	25.9403	1.55973	1.62188
TGTATTAAACGGTAAGGGCCGGCT	23H-RNA	mir-5592		27.9467	13.7864	4.08672	5.55326	306.764	108.532	21.2449	21.01		7.71546	20.81	6.38682	4.70938	138.559	51.8806	19.608	23.9678
CTTTTTTCACCAAGAACGAAACC	23H-RNA	E01G4.7		25.152	32.1683	0.645272	0.358275	18.5917	14.4709	0.56906	0.84889		3.85773	36.4176	0.19354	0.162393	9.55582	10.3761	0.445636	0.720835
GACGACGAACGATCGGGATGGA	23H-RNA	ChrX_intergenic1		25.152	9.19093	0.860363	1.4331	32.5356	50.6481	0.379373	0.84889		0	0	0.58062	0.64957	0	0	0.668454	0.720835
GTATTAAACGGTAAGGGCCGGC	23H-RNA	mir-5592		25.152	64.3365	98.2964	80.0745	92.9587	123.002	86.6868	70.6701		27.0041	52.0251	63.6746	53.7519	52.557	15.5642	65.2857	73.8856
TCCTGATCGCTCATCTAAACAACC	23H-RNA	F31C3.9, rrn-3.1		25.152	0	12.2602	12.0022	27.8876	21.7063	11.3812	14.4311		23.1464	0	12.3866	10.2307	28.6674	20.7522	13.5919	9.19064
TGAAGAGGCAGGGTCCGGTTGC	23H-RNA	Y57G11C.1145_hairpin		25.152	32.1683	3.65654	1.4331	111.55	144.709	1.51749	1.27334		23.1464	36.4176	0.9677	1.29914	28.6674	41.5045	0.891272	1.26146
CGTCGTCGTCATCCACTCCACC	23H-RNA	Y57G11C.1145_hairpin		22.3573	59.7411	0.860363	0.179138	60.4232	72.3544	0.758747	0.424445		0	0	0	0	0	5.18806	0	0
TATTAAACGGTAAGGGCCGGCTGG	23H-RNA	mir-5592		22.3573	68.932	0.430181	0.71655	116.198	267.711	1.13812	0.636668		23.1464	15.6075	0.77416	0.64957	43.0012	67.4448	0.891272	1.08125
TCTTTCATCGTACGACGCTGTT	23H-RNA	F52G3.8		22.3573	18.3819	1.50563	1.07483	32.5356	57.8835	0.379373	0.84889		0	0	0.19354	0	0	10.3761	0.668454	0.180209
TTGCCTCTGAATGCCGAGTAGT	23H-RNA	IR1_CE		22.3573	45.9547	0.215091	0.71655	27.8876	50.6481	0.189687	0		0	0	0.38708	0	0	15.5642	0	0
CCGATGTTTCTGAGATGTCTTC	23H-RNA	F43E2.6		19.5627	9.19093	2.58109	1.61224	106.903	180.886	2.46593	3.18334		0	0	1.35478	1.13675	4.77791	15.5642	1.33691	1.26146
GATTACGTCCCTGCCCTTTGT	23H-RNA	F31C3.7, F31C3.8, rrn-1.1, rrn-1.2		19.5627	50.5501	8.17345	25.0793	46.4794	50.6481	30.7293	26.1034		88.7278	72.8352	34.8372	27.4443	148.115	15.5642	34.7596	26.1303
AAACAACCCTGAACCAGACGT	23H-RNA	F31C3.11, rrn-2.1, rrn-2.1_element		16.768	13.7864	4.08672	6.80723	4.64794	14.4709	8.5359	6.15445		30.8618	83.2402	2.70956	4.3846	38.2233	93.3851	4.67918	6.12709
AAATTGTCGGCCGCCGTGGAAAC	23H-RNA	Unknown_hairpin_RE2		16.768	13.7864	0.215091	0.537413	4.64794	28.9417	0	0		0	15.6075	0	0	4.77791	15.5642	0	0.360417
ATCGGACGAGCTCTTATCCCCTC	23H-RNA	T05E12.8		16.768	36.7637	0.430181	0.537413	65.0711	57.8835	0.948434	0.636668		0	20.81	0	0.324785	0	10.3761	0.222818	0.180209
CACGGGGCGATCCAAGAACCT	23H-RNA	Y81B9A.5		16.768	22.9773	1.50563	1.07483	41.8314	50.6481	1.70718	1.06111		104.159	104.05	1.16124	1.46153	43.0012	103.761	1.55973	1.08125
CCCCATTGCCGAATGTTTGAATC	23H-RNA	Y37E3.30		16.768	9.19093	0.430181	0	27.8876	36.1772	0.189687	1.06111		0	5.20251	0.38708	0.162393	4.77791	0	0	0
TATTCCTGATGCGGCGCCGGCTC	23H-RNA	T05E12.8		16.768	9.19093	0.215091	0.179138	4.64794	14.4709	0	0.424445		3.85773	5.20251	0	0.162393	4.77791	10.3761	0	0.180209
TGAAGAGGCAGGGTCCGGTTGCG	23H-RNA	Y57G11C.1145_hairpin		16.768	18.3819	1.93582	1.07483	32.5356	115.767	1.13812	1.91		23.1464	0	0.9677	0.64957	14.3337	10.3761	1.11409	0.180209
ATCTCAGAAACATCGGCAAATG	23H-RNA	F43E2.6		13.9733	22.9773	1.50563	1.61224	139.438	79.5898	2.08655	1.69778		7.71546	26.0126	1.54832	1.29914	38.2233	36.3164	0.668454	1.62188
ATGAAGAGGCAGGGTCCGGTTGC	23H-RNA	Y57G11C.1145_hairpin		13.9733	4.59547	3.44145	3.04534	65.0711	72.3544	3.98342	2.97112		11.5732	5.20251	3.09664	4.22221	4.77791	10.3761	2.00536	4.32501
CATCCCGATCGTTCGTCGTCGCC	23H-RNA	ChrX_intergenic1		13.9733	13.7864	0.215091	0.895688	37.1835	28.9417	1.70718	0.212223		0	0	0	0	0	0	0	0.180209
CATCTCAGAAACATCGGCAAAT	23H-RNA	F43E2.6		13.9733	22.9773	1.72073	1.25396	260.284	159.18	4.36279	4.88112		3.85773	36.4176	1.35478	0.974355	215.006	88.197	6.68454	3.60417
CCGTGATGGGACAGCCTGACACC	23H-RNA	CELE14B		13.9733	36.7637	0.215091	0.179138	32.5356	43.4126	0.379373	0.424445		0	0	0	0	0	0	0	0.180209
GAGTGGATGACGACGACGATGGC	23H-RNA	Y57G11C.1145_hairpin		13.9733	9.19093	1.50563	0.71655	55.7752	57.8835	0.189687	0.84889		3.85773	10.405	0	0.162393	0	10.3761	0.445636	0.540626
TATCGCACTCTTTGCCCTTCCG	23H-RNA	jmjc-1, T28F2.4		13.9733	27.5728	0.215091	0.71655	41.8314	36.1772	0.379373	0.212223		0	5.20251	0.19354	0.487178	14.3337	5.18806	0.445636	0.360417
TGGAGTGGATGACGACGACGATG	23H-RNA	Y57G11C.1145_hairpin		13.9733	9.19093	3.01127	2.50793	13.9438	101.296	2.08655	1.69778		0	0	1.54832	1.62393	4.77791	0	0.668454	1.08125
TTGCTTTTTGATCCTTCGATGT	23H-RNA	F31C3.10, F31C3.9, rrn-3.1, rrn-3.56		13.9733	0	0.430181	0.358275	4.64794	21.7063	0.189687	0.636668		3.85773	15.6075	0.38708	1.46153	23.8895	0	0.445636	1.44167
ATTTGCCGATGTTTCTGAGATG	23H-RNA	F43E2.6		11.1787	18.3819	4.94709	3.22448	23.2397	7.23544	3.98342	3.39556		7.71546	0	4.45142	2.43589	0	20.7522	2.451	1.62188
CATCTCAGAAACATCGGCAAA	23H-RNA	F43E2.6		11.1787	0	0.430181	0.895688	74.367	65.1189	0.948434	2.12223		0	0	0.38708	0.162393	9.55582	5.18806	0.668454	0.180209
CATGGCCGTTCTTAGTTGGTGGA	23H-RNA	F31C3.7, F31C3.8, rrn-1.1, rrn-1.2		11.1787	9.19093	3.44145	2.68706	4.64794	14.4709	2.27624	0.424445		7.71546	10.405	4.06434	2.59828	23.8895	0	0.891272	0.901043
CCGGCCCTTACCGTTTAATAC	23H-RNA	mir-5592		11.1787	22.9773	0	0.179138	18.5917	79.5898	0.56906	0		11.5732	5.20251	0.77416	0.162393	28.6674	20.7522	0.445636	0.360417
CCTTTCGGAGTGATAGCGATAAC	23H-RNA	Y116A8B.1		11.1787	9.19093	0.860363	0.537413	9.29587	50.6481	1.13812	1.69778		0	5.20251	0.38708	0.324785	0	5.18806	1.11409	1.62188
CGCGCGCCGCTATGTTTAACTC	23H-RNA	PALTA3		11.1787	18.3819	0	0	13.9438	7.23544	0	0.424445		0	0	0	0	0	0	0	0.180209
GAAGAATGCTGGAACACGTCGT	23H-RNA	Y37E3.30		11.1787	22.9773	1.07545	0.895688	0	14.4709	0.948434	0.424445		0	0	0.19354	0.324785	4.77791	0	0	0.180209
GTGGAGCCTGCACTGTTGATTTC	23H-RNA	T05E12.8		11.1787	0	0.430181	0.358275	23.2397	0	0	0.212223		7.71546	5.20251	0.19354	0	9.55582	5.18806	0.445636	0.180209
TCAACAGACTGATGGACGATG	23H-RNA	C36A4.14		11.1787	4.59547	1.93582	0	23.2397	14.4709	0.56906	0.84889		7.71546	10.405	0	0.811963	0	5.18806	0	0.360417
TCATGCGTCTCGGTGGTCCGAA	23H-RNA	Y37E3.30		11.1787	9.19093	0.430181	0.537413	13.9438	43.4126	0.379373	0		0	5.20251	0.19354	0	9.55582	25.9403	0.222818	0
TGATTACGTCCCTGCCCTTTGT	23H-RNA	F31C3.7, F31C3.8, rrn-1.1, rrn-1.2		11.1787	22.9773	6.8829	13.2562	32.5356	50.6481	13.6574	9.12557		50.1505	78.0377	17.9992	17.376	28.6674	41.5045	13.1463	11.1729
TGTATTAAACGGTAAGGGCCG	23H-RNA	mir-5592		11.1787	13.7864	9.03381	6.44895	32.5356	65.1189	3.22467	5.94223		73.2969	57.2276	5.22558	6.65809	66.8907	46.6925	3.56509	4.32501
TGTATTAAACGGTAAGGGCCGG	23H-RNA	mir-5592		11.1787	9.19093	15.2714	17.9138	55.7752	43.4126	11.9503	9.55001		73.2969	72.8352	12.193	14.1281	71.6686	98.5731	12.4778	16.5792
TTCGTTCTTGGTGAAAAAAGTG	23H-RNA	E01G4.7		11.1787	13.7864	0.645272	0.71655	69.7191	7.23544	1.89687	0		7.71546	26.0126	0.19354	0.324785	19.1116	31.1284	0	0.360417
TTGCCAAATGGACGTACAGATC	23H-RNA	Y105C5A.14		11.1787	9.19093	0.215091	0	37.1835	7.23544	0.948434	0		0	10.405	0.38708	0.162393	4.77791	0	0	0
TTGCCGATGTTTCTGAGATGTCTT	23H-RNA	F43E2.6		11.1787	27.5728	0.215091	0.71655	74.367	43.4126	1.32781	1.27334		7.71546	15.6075	0	0.162393	9.55582	36.3164	0.222818	0.180209
TTTTTTGGCACCGCTGTTCTGC	23H-RNA	F55A4.9, rncs-1		11.1787	18.3819	0.215091	0.537413	18.5917	14.4709	0.379373	0.424445		19.2887	26.0126	0.19354	0.324785	19.1116	20.7522	0	0.360417
AGTGGATGACGACGACGATGGCT	23H-RNA	Y57G11C.1145_hairpin		8.384	4.59547	0.215091	0.358275	23.2397	28.9417	0.189687	0.84889		0	0	0.38708	0	0	0	0	0.360417
ATCCCCCCTCCTGTGGAAGTAGA	23H-RNA	C36A4.14		8.384	9.19093	0.215091	0.71655	51.1273	50.6481	0	1.69778		0	0	0.19354	0	14.3337	0	0.891272	0
ATGATGGCGTGGAAGAAGTTGA	23H-RNA	Y57G11C.1145_hairpin		8.384	4.59547	0.430181	0.179138	13.9438	7.23544	0.189687	0.212223		3.85773	0	0.77416	0.162393	4.77791	5.18806	0.222818	0
CGGCCCTTACCGTTTAATACATG	23H-RNA	mir-5592		8.384	13.7864	7.31308	7.1655	148.734	173.65	18.3996	13.37		11.5732	5.20251	5.22558	4.54699	14.3337	62.2567	12.4778	17.6604
GATGATGGCGTGGAAGAAGTTGA	23H-RNA	Y57G11C.1145_hairpin		8.384	0	1.93582	0.179138	41.8314	94.0607	1.89687	2.33445		7.71546	26.0126	0.58062	0.811963	66.8907	160.83	0	3.06355
GCCCTTTGTACACACCGCCCGTC	23H-RNA	F31C3.7, F31C3.8, rrn-1.1, rrn-1.2		8.384	0	0.645272	1.07483	9.29587	0	0.758747	0.424445		3.85773	5.20251	2.9031	2.59828	0	0	0.891272	0.360417
GGTGAGACATGGTATCGAGATATG	23H-RNA	Y37E11B.2		8.384	9.19093	0.645272	0	74.367	14.4709	0.758747	0.424445		7.71546	0	0.38708	0	28.6674	15.5642	0.222818	0
GTTTCCAGCAGTGTCGTATGTCC	23H-RNA	F31C3.9, rrn-3.1		8.384	0	0.860363	1.07483	9.29587	0	1.13812	0		11.5732	0	0.58062	0.811963	0	0	1.11409	1.80209
TAAACATAGCGGCGCGCGGAACA	23H-RNA	PALTA3		8.384	13.7864	0	0	0	7.23544	0	0		0	0	0	0	4.77791	0	0	0
TAAACGGTAAGGGCCGGCTGG	23H-RNA	mir-5592, R07C3.18, R07C3.19		8.384	9.19093	0.215091	0.537413	13.9438	21.7063	0	0		11.5732	15.6075	0.58062	0.487178	14.3337	31.1284	0	0.180209
TAGTTTTCGGGGTACGGTATCT	23H-RNA	ChrIII_hairpin2		8.384	0	0.215091	0.179138	46.4794	14.4709	0.758747	0		0	0	0	0.811963	14.3337	5.18806	0.222818	0
TCAATGACGGAGTCGAGATCGA	23H-RNA	Y37E11B.2		8.384	13.7864	0.430181	0.179138	41.8314	21.7063	0	0.636668		7.71546	10.405	1.54832	0.974355	0	0	0.222818	0.901043
TCCGATCTGGCAAGTTAAGCAA	23H-RNA	rrn-4_RE		8.384	32.1683	4.08672	1.61224	46.4794	36.1772	3.60405	1.48556		15.4309	31.2151	1.16124	0.811963	23.8895	5.18806	0.891272	0.540626
TTCTGAGATGTCTTCACAATTC	23H-RNA	F43E2.6		8.384	4.59547	1.07545	0.71655	23.2397	14.4709	1.32781	0.636668		34.7196	10.405	0.38708	0.487178	23.8895	15.5642	0.668454	0.540626
TTCTGAGATGTCTTCACAATTCT	23H-RNA	F43E2.6		8.384	13.7864	2.79618	1.79138	69.7191	79.5898	3.60405	1.91		65.5814	67.6326	2.12894	1.46153	186.338	114.137	0.668454	1.44167
TTGATCTCTATGCGACCCCACAC	23H-RNA	T05E12.10		8.384	0	0	0.179138	4.64794	7.23544	0.379373	0		0	0	0.19354	0	4.77791	0	0	0
TTGCCGATGTTTCTGAGATGT	23H-RNA	F43E2.6		8.384	0	0.645272	0.895688	0	7.23544	0.189687	0		7.71546	5.20251	0	0	9.55582	10.3761	0	0.180209
TTTTTTCTGTATTCTTATTTTT	23H-RNA	F52G3.8		8.384	0	0.645272	1.4331	13.9438	0	2.27624	1.48556		84.8701	52.0251	0	0.324785	66.8907	72.6328	0.445636	0.720835
AATCGGGATGGATCGATGGATT	23H-RNA	T05E12.10		5.58933	9.19093	0	0.358275	4.64794	0	0.948434	0		7.71546	52.0251	0	0.64957	28.6674	62.2567	0.668454	0.180209
AATTGTGAAGACATCTCAGAA	23H-RNA	F43E2.6		5.58933	4.59547	0.430181	0	32.5356	28.9417	0.379373	0.636668		0	5.20251	0.77416	0	0	0	0	0.360417
ACGTGTTCCAGCATTCTTCGAC	23H-RNA	Y37E3.30		5.58933	27.5728	0.645272	1.07483	18.5917	14.4709	1.13812	2.12223		11.5732	10.405	0.38708	0.324785	9.55582	5.18806	0	0.901043
ACTGCCGCACGGTTTCGAAACT	23H-RNA	DNA-8-1		5.58933	9.19093	0	0	9.29587	21.7063	0	0		0	10.405	0.19354	0.162393	4.77791	0	0.222818	0
ACTTGATTTCTCTGAAAATAGCA	23H-RNA	ZK430.7		5.58933	0	0.215091	0	32.5356	14.4709	0.379373	0.84889		0	0	0	0.162393	4.77791	0	0.445636	0.180209
AGTCAGTTGGATGGGAAAATG	23H-RNA	W04B5.8		5.58933	9.19093	0.215091	0.71655	55.7752	7.23544	0.948434	1.69778		7.71546	0	0.9677	0.974355	4.77791	0	0.222818	0.180209
AGTGGAGTGGATGACGACGACGG	23H-RNA	Y57G11C.51		5.58933	0	5.37727	0.179138	18.5917	123.002	0.379373	1.48556		15.4309	0	0.38708	0.487178	0	10.3761	0	0.720835
AGTGGATGACGACGACGATGGC	23H-RNA	Y57G11C.1145_hairpin		5.58933	0	0	0	4.64794	14.4709	0	0		0	0	0	0	0	0	0.222818	0
ATCCCAGAACTGGAAATCTTCAC	23H-RNA	other		5.58933	13.7864	0.215091	0.358275	0	0	0	0		0	5.20251	0.19354	0	9.55582	0	0.222818	0.360417
ATCGTCGTCGTCATCCACTCCA	23H-RNA	Y57G11C.1145_hairpin		5.58933	36.7637	0.430181	1.07483	27.8876	28.9417	0.56906	1.06111		7.71546	0	0.58062	0.162393	9.55582	0	0.891272	0.901043
ATGTATGGAGGACGAACACAACC	23H-RNA	C36A4.14		5.58933	18.3819	1.07545	0.179138	32.5356	65.1189	0.948434	0.636668		0	5.20251	0.38708	0.64957	4.77791	0	0	0
ATTCGGGAATTAGTTGTCGACA	23H-RNA	T05E12.8		5.58933	4.59547	2.15091	2.32879	18.5917	21.7063	1.13812	1.91		15.4309	15.6075	1.16124	3.08546	43.0012	62.2567	0.445636	1.08125
ATTTGCCGATGTTTCTGAGATGT	23H-RNA	F43E2.6		5.58933	0	7.52817	8.5986	153.382	36.1772	13.6574	12.3089		19.2887	20.81	8.32222	6.17092	81.2244	119.325	10.6953	8.46981
CAAGTGCGACATAAAGGGAACA	23H-RNA	T05E12.10		5.58933	0	0.645272	0.179138	23.2397	0	0.379373	0		0	0	0.19354	0.162393	0	0	0	0.180209
CAGCCGGCCCTTACCGTTTAAT	23H-RNA	mir-5592		5.58933	0	0	0	9.29587	7.23544	0	0		0	0	0	0	4.77791	5.18806	0	0
CCCTTCTACTTGGACGGAACA	23H-RNA	Y17D7C.3		5.58933	0	0	0	9.29587	7.23544	0.189687	0.212223		0	0	0.19354	0.162393	0	5.18806	0.222818	0.540626
CCGATGTTTCTGAGATGTCTTCA	23H-RNA	F43E2.6		5.58933	9.19093	1.93582	0.895688	325.356	260.476	4.17311	2.97112		0	0	0.77416	0.811963	28.6674	10.3761	2.451	2.52292
CCGCGCGCCGCTATGTTTAACT	23H-RNA	PALTA3		5.58933	32.1683	0.215091	0.358275	18.5917	72.3544	0	0		23.1464	20.81	0	0.487178	28.6674	15.5642	0.222818	0.360417
CGCCAAACATGGATCAACTGGA	23H-RNA	ZK402.2, ZK402.3, ZK402.5		5.58933	0	0	0	0	0	0	0		3.85773	0	0	0	0	0	0	0
CGGTGTGCTCGAGGGCTTGTCA	23H-RNA	Y37E3.30		5.58933	0	0.645272	0	4.64794	7.23544	0.189687	0		0	0	0.58062	0	0	0	0.445636	0
GATGATGGCGTGGAAGAAGTTG	23H-RNA	Y57G11C.1145_hairpin		5.58933	0	0.860363	0.179138	27.8876	28.9417	0.56906	0.636668		3.85773	5.20251	0.38708	0	14.3337	41.5045	0.222818	0.360417
GCCCTTACCGTTTAATACATG	23H-RNA	mir-5592		5.58933	13.7864	1.29054	0.895688	23.2397	7.23544	0.189687	1.06111		23.1464	15.6075	2.32248	1.13675	9.55582	36.3164	1.55973	1.44167
GTGCCTAACTTCTCGCTCATGA	23H-RNA	F31C3.9, rrn-3.1		5.58933	13.7864	0.215091	1.25396	0	7.23544	0.56906	0.636668		7.71546	0	0.9677	0.162393	0	0	1.11409	1.26146
TAAACATAGCGGCGCGCGGAACT	23H-RNA	PALTA3, talp-3, Y48A6C.4, Y57G11C.32		5.58933	0	0.215091	0	23.2397	21.7063	0	0		0	0	0	0	9.55582	0	0.445636	0
TACAACGTGGAGCTAAGACACC	23H-RNA	F55C9.3		5.58933	0	1.29054	0	13.9438	43.4126	0.189687	0.636668		0	0	0.38708	0	4.77791	0	0	0.901043
TACAACGTGGAGCTAAGACACCC	23H-RNA	F55C9.3		5.58933	0	3.65654	2.14965	4.64794	43.4126	2.27624	1.06111		0	0	1.74186	0.974355	0	5.18806	1.11409	2.34271
TACCACCACTTTCATCGACTCTT	23H-RNA	F31C3.9, rrn-3.1		5.58933	9.19093	0.215091	0.895688	13.9438	0	0.379373	0.212223		3.85773	0	1.16124	1.13675	4.77791	0	0.445636	0.720835
TACGTTTACATGGAGGTCCCGCC	23H-RNA	F39E9.29_region, F39E9.7		5.58933	0	0.215091	0	9.29587	21.7063	0	0.424445		3.85773	10.405	0	0.162393	0	0	0	0.720835
TATTAGACTCCACATATCATTT	23H-RNA	Y37E11B.2		5.58933	4.59547	0	0.358275	4.64794	7.23544	0	0		0	10.405	0	0	4.77791	10.3761	0	0.180209
TCATCTCTGATCTTTTCCAAT	23H-RNA	F55A4.9, rncs-1		5.58933	0	0	0	0	0	0	0		0	0	0	0	0	0	0	0
TCGTCGTCATCCACTCCACCGA	23H-RNA	Y57G11C.1145_hairpin		5.58933	0	1.07545	0.358275	18.5917	57.8835	0.758747	0.636668		0	5.20251	0.19354	0.64957	4.77791	25.9403	0	1.08125
TCTGAGATGTCTTCACAATTCT	23H-RNA	F43E2.6		5.58933	27.5728	0.860363	0.179138	46.4794	57.8835	0.948434	0.424445		3.85773	10.405	0.58062	0.64957	28.6674	10.3761	0.222818	0.360417
TCTGCGGAAGTGGTCTTCTACC	23H-RNA	Y37E3.30		5.58933	0	0	0	46.4794	7.23544	0	0.84889		0	0	0	0	4.77791	0	0	0
TCTTACTGTAGTTTTCGCTAAGA	23H-RNA	PALTA4		5.58933	0	0	0	0	7.23544	0	0		0	0	0.19354	0	0	5.18806	0	0
TGATGCGGTTGTTCCAAAGAATC	23H-RNA	F55A4.9, rncs-1		5.58933	4.59547	0	0.179138	51.1273	14.4709	0	0.212223		3.85773	5.20251	0.19354	0	4.77791	5.18806	0	0.180209
TGCGTGGCGTGTACTGCAGAAAAC	23H-RNA	PALTA3		5.58933	0	0	0.358275	13.9438	21.7063	0	0		0	10.405	0	0	0	15.5642	0	0
TGGAAACGTCAAGAAGTTTGATC	23H-RNA	F52G3.8		5.58933	4.59547	0.430181	0.537413	0	14.4709	0.189687	0.636668		0	5.20251	0.19354	0	0	10.3761	0	0.360417
TTCTGTGGGCGGGGCCAATCCC	23H-RNA	DNA-8-1		5.58933	0	0	0	0	0	0	0		0	0	0.38708	0	0	0	0	0
TTGTGTCGACAACTAATTCCCGA	23H-RNA	T05E12.8		5.58933	4.59547	0.860363	0.537413	37.1835	7.23544	0.758747	0.636668		3.85773	15.6075	0	0.64957	9.55582	25.9403	0	0.360417
TTTTCCCATCCAACTGACTGA	23H-RNA	W04B5.8		5.58933	0	0.215091	0	0	0	0	0		0	0	0	0.162393	0	0	0.445636	0
TTTTTGCTGATCTCTCTTCTCGG	23H-RNA	ChrIII_hairpin1		5.58933	4.59547	0	0	13.9438	7.23544	0.379373	0.636668		0	0	0.19354	0	0	0	0	0
AAAAGTTTATGTTGACGGGGAA	23H-RNA	TC5		2.79467	0	0	0.179138	0	0	0	0		0	0	0	0.162393	0	0	0.222818	0
AACGTGTCGCTTCGTCATCTGA	23H-RNA	F55A4.9, rncs-1		2.79467	0	0	0	9.29587	7.23544	0.379373	0.212223		0	0	0	0	0	0	0	0
AACTTCTTCCACGCCATCATCCA	23H-RNA	Y57G11C.1145_hairpin		2.79467	0	1.07545	0	32.5356	65.1189	0.56906	0.84889		3.85773	5.20251	0.9677	0.162393	9.55582	15.5642	0.445636	0.540626
AAGAACAAGCCGTGGGCAAGC	23H-RNA	F39E9.7, F55A4.4		2.79467	4.59547	0.430181	0.71655	0	0	0.189687	0.212223		0	0	0	0	4.77791	5.18806	0.445636	0
AATCGGAAACTCAAAGACCACAC	23H-RNA	Y17D7C.3		2.79467	0	0	0	13.9438	0	0.189687	0		0	0	0	0.324785	0	0	0.222818	0
AATTGTGAAGACATCTCAGAAA	23H-RNA	F43E2.6		2.79467	4.59547	0.645272	0.358275	9.29587	7.23544	0.379373	0.424445		3.85773	5.20251	0.19354	0	19.1116	5.18806	0.445636	0.540626
ACATCTCAGAAACATCGGCAAAT	23H-RNA	F43E2.6		2.79467	13.7864	0.645272	0.895688	9.29587	43.4126	0.189687	2.12223		0	0	0.9677	0.162393	14.3337	5.18806	0.891272	0.720835
ACCGGACCCTGCCTCTTCATC	23H-RNA	Y57G11C.1145_hairpin		2.79467	4.59547	0	0	9.29587	0	0	0		0	0	0	0	0	0	0	0
ACCTCCATGTCGTAGGAATGCT	23H-RNA	C40A11.10, mir-8199		2.79467	0	0	0	4.64794	0	0.189687	0		0	5.20251	0	0	0	0	0	0
ACGACGATGGCTGCGGCGAGGA	23H-RNA	Y57G11C.1145_hairpin		2.79467	0	0	0	0	0	0.189687	0		0	0	0	0	0	0	0.222818	0
ACGATGGATTCTTTGGAGCAAC	23H-RNA	F55A4.9, rncs-1		2.79467	0	0	0	0	0	0	0		0	0	0	0	0	0	0.222818	0
ACGATGGCTGCGGCGAGGATGA	23H-RNA	Y57G11C.1145_hairpin		2.79467	0	0	0	4.64794	0	0.189687	0.212223		0	0	0	0	0	0	0.222818	0
ACTTCTTCCACGCCATCATCCAC	23H-RNA	Y57G11C.1145_hairpin		2.79467	0	0	0.179138	0	0	0	0		0	0	0	0	0	0	0	0
AGCCAATATCGGACGATGAAGCC	23H-RNA	other		2.79467	0	0	0	0	14.4709	0.189687	0		0	5.20251	0	0	4.77791	0	0.222818	0
AGCCGGCCCTTACCGTTTAATAC	23H-RNA	mir-5592		2.79467	0	0	0.179138	4.64794	28.9417	0	0		0	10.405	0	0	0	5.18806	0.668454	0.180209
AGTCGGGTTGCTTGAAAGTGC	23H-RNA	F31C3.9, rrn-3.1		2.79467	4.59547	0.215091	0.358275	0	0	0.189687	0		15.4309	0	0.38708	0.487178	4.77791	0	0	0.540626
AGTGGAGTGGATGACGACGAC	23H-RNA	Y57G11C.1145_hairpin, Y57G11C.51		2.79467	9.19093	1.72073	1.25396	37.1835	21.7063	1.32781	1.48556		0	0	0	0.324785	9.55582	5.18806	1.55973	0.720835
ATATTTGGAACAGAAGCAAGAGG	23H-RNA	F19B2.5		2.79467	0	0.215091	0	0	43.4126	0.189687	0.212223		0	5.20251	0	0	0	5.18806	0	0.180209
ATCGTCGTCGTCATCCACTCC	23H-RNA	Y57G11C.1145_hairpin		2.79467	4.59547	0.215091	0.179138	0	21.7063	0.189687	0.212223		0	0	0.19354	0	0	0	0.222818	0.360417
ATGACGACGACGATGGCTGCGG	23H-RNA	Y57G11C.1145_hairpin		2.79467	4.59547	0.215091	0	4.64794	7.23544	0	0.212223		0	0	0	0.162393	0	5.18806	0	0
ATGATGGCGTGGAAGAAGTTG	23H-RNA	Y57G11C.1145_hairpin		2.79467	0	0	0.358275	0	0	0	0.424445		0	5.20251	0	0.162393	0	0	0	0
ATGATGGCGTGGAAGAAGTTGAT	23H-RNA	Y57G11C.1145_hairpin		2.79467	0	0	0	0	7.23544	0.379373	0		0	0	0	0.162393	0	0	0	0
ATGATGTGGATGATGGCGTGGAA	23H-RNA	Y57G11C.1145_hairpin		2.79467	0	0	0	0	7.23544	0	0.424445		0	0	0	0.162393	0	0	0	0
ATGTATGGAGGACGAACACAAC	23H-RNA	C36A4.14		2.79467	9.19093	0	0	4.64794	7.23544	0.379373	0.212223		0	0	0.19354	0	0	0	0	0.180209
ATTCCACTTGCATCATACGACG	23H-RNA	F52D2.6		2.79467	0	0	0.358275	4.64794	7.23544	0	0.212223		0	0	0.19354	0	0	0	0	0
ATTCGGGAATTAGTTGTCGACAC	23H-RNA	T05E12.8		2.79467	0	0.215091	0.179138	0	0	0	0.424445		0	0	0.19354	0.487178	0	0	0.222818	0
ATTGGGTCAGGGAAGTACTTCG	23H-RNA	W05H12.4		2.79467	0	0	0	0	14.4709	0.189687	0		0	0	0	0	0	0	0	0
ATTTGCCGATGTTTCTGAGATGTC	23H-RNA	F43E2.6		2.79467	9.19093	6.66781	5.55326	148.734	72.3544	7.77716	6.15445		3.85773	0	5.03204	3.57264	28.6674	36.3164	2.67382	3.96459
CAAACTGGATTGACGAGCATCG	23H-RNA	F55A4.9, rncs-1		2.79467	0	0	0	0	0	0	0		0	0	0	0	0	10.3761	0.222818	0
CAGCGTCGTACGATGAAAGATG	23H-RNA	F52G3.8		2.79467	0	0.645272	0.179138	41.8314	21.7063	0.379373	0.636668		0	0	0	0.162393	0	0	0.891272	0.180209
CCCTTTGTACACACCGCCCGTC	23H-RNA	F31C3.7, F31C3.8, rrn-1.1, rrn-1.2		2.79467	13.7864	0.645272	1.07483	4.64794	0	1.70718	0.424445		11.5732	10.405	2.12894	0.64957	19.1116	0	0.668454	2.34271
CCCTTTGTACACACCGCCCGTCG	23H-RNA	F31C3.7, F31C3.8, rrn-1.1, rrn-1.2		2.79467	0	0.860363	1.61224	0	0	2.08655	0.212223		3.85773	10.405	0.77416	0.324785	0	0	0.445636	0.720835
CCGATTTCTGCCCCCCCAAAATG	23H-RNA	PAL8C		2.79467	4.59547	0.860363	0.358275	0	0	0.189687	0		0	0	0.38708	0.324785	0	0	0	0.360417
CCTTCTACTTGGACGGAACAGCC	23H-RNA	Y17D7C.3		2.79467	13.7864	0	0.358275	13.9438	21.7063	0.189687	0		3.85773	5.20251	0.38708	0.487178	0	10.3761	0.222818	0.180209
CGATGGCTGCGGCGAGGATGATG	23H-RNA	Y57G11C.1145_hairpin		2.79467	0	0.645272	0.537413	79.0149	188.121	0.758747	1.91		0	0	0	0.162393	23.8895	25.9403	1.11409	1.08125
CGATGTTTCTGAGATGTCTTC	23H-RNA	F43E2.6		2.79467	4.59547	0.430181	0.537413	27.8876	21.7063	0.379373	1.27334		0	0	0.58062	0.811963	0	0	0.668454	0.360417
CGTCGTCATCCACTCCACCGA	23H-RNA	Y57G11C.1145_hairpin		2.79467	0	0.215091	0.179138	18.5917	14.4709	0.189687	0.84889		3.85773	0	0	0	0	10.3761	0.445636	1.08125
CGTCGTCGTCATCCACTCCACT	23H-RNA	Y57G11C.1145_hairpin		2.79467	9.19093	0	0.179138	0	0	0	0		0	0	0	0	0	0	0	0
CTAATAACCGGTATACCGAATT	23H-RNA	E01G4.7		2.79467	0	0	0	0	0	0.189687	0		0	0	0	0	0	0	0	0.180209
CTAATCGTCCCGATCCTTTCATC	23H-RNA	ChrX_intergenic1		2.79467	0	0	0	0	7.23544	0.379373	1.48556		0	0	0	0	0	0	0	0
CTGATCTCTCTTCTCGGCTCTT	23H-RNA	ChrIII_hairpin1		2.79467	0	0.215091	0.537413	4.64794	7.23544	0.189687	0.424445		0	0	0	0	9.55582	0	0.445636	0
CTTCTACATCCGTAAGAGGAACC	23H-RNA	Y17D7C.3		2.79467	0	0.215091	0	0	0	0	0		0	0	0	0	0	0	0	0
GAAGGGCAAAGAGTGCGATATC	23H-RNA	jmjc-1, T28F2.4		2.79467	4.59547	0	0	18.5917	43.4126	0	0.212223		0	0	0.19354	0	4.77791	0	0	0.180209
GCCGATGTTTCTGAGATGTCTT	23H-RNA	F43E2.6		2.79467	0	0.860363	0.358275	4.64794	0	0.758747	0.212223		0	10.405	0	0	19.1116	15.5642	0.668454	0
GGCCCTTACCGTTTAATACATG	23H-RNA	mir-5592		2.79467	4.59547	1.93582	0.358275	9.29587	14.4709	0.56906	0.636668		0	0	0	0.487178	0	5.18806	0.668454	1.44167
GGGGTATATATGGGTTCTAAGATC	23H-RNA	Y116F11A.1		2.79467	0	0	0	0	14.4709	0.189687	0.636668		0	0	0	0	0	0	0	0
GGTGGAGTGGATGACGACGACG	23H-RNA	Y57G11C.1145_hairpin		2.79467	4.59547	0.215091	0	4.64794	0	0.379373	0.212223		0	0	0	0.324785	0	0	0	0
GTCGTCGTCATCCACTCCACCGA	23H-RNA	Y57G11C.1145_hairpin		2.79467	4.59547	0	0.537413	88.3108	57.8835	0.56906	0.636668		0	0	0	0	0	10.3761	0.668454	1.08125
TAAACATAGCGGCGCGCGGAACC	23H-RNA	PALTA3		2.79467	0	0	0.179138	9.29587	28.9417	0	0.84889		0	0	0.19354	0	0	0	0	0
TAACAGGGATGAAGTAACGCCA	23H-RNA	other		2.79467	0	0	0	0	0	0	0		0	0	0	0	0	0	0	0
TAATTCTGCAGCCACTTCCGAA	23H-RNA	W03D2.15		2.79467	9.19093	0.645272	0.179138	9.29587	21.7063	0.189687	0		3.85773	0	0.38708	0.162393	0	0	0	0
TATTCCTGATGCGGCGCCGGCT	23H-RNA	T05E12.8		2.79467	13.7864	0	0.358275	37.1835	14.4709	0.948434	0.636668		0	31.2151	0.58062	0	9.55582	10.3761	0	0.720835
TATTTGGAACAGAAGCAAGAGGA	23H-RNA	F19B2.5		2.79467	0	0	0	0	0	0	0		0	0	0	0	0	0	0	0.360417
TCAATTGTTGTGAAGCTAGCTCC	23H-RNA	W03D2.15		2.79467	0	0	0	4.64794	7.23544	0	0		0	0	0	0	0	5.18806	0	0.180209
TCATCTAAACAACCGTACTGGA	23H-RNA	F31C3.9, rrn-3.1		2.79467	4.59547	1.29054	2.8662	13.9438	0	1.70718	0.636668		7.71546	10.405	1.35478	0.64957	4.77791	15.5642	0.891272	1.62188
TCCCACGATTTCATTTGCACTG	23H-RNA	Unknown_RE7		2.79467	0	0	0	0	0	0	0		0	0	0	0	0	0	0	0
TCCCTGCCCTTTGTACACACCG	23H-RNA	F31C3.7, F31C3.8, rrn-1.1, rrn-1.2		2.79467	4.59547	2.366	0.895688	0	14.4709	1.70718	0.636668		15.4309	10.405	0.77416	0.162393	0	5.18806	0.668454	0.901043
TCTCAGAAACATCGGCAAATG	23H-RNA	F43E2.6		2.79467	9.19093	0	0	4.64794	0	0	0.424445		3.85773	5.20251	0	0	9.55582	10.3761	0	0.180209
TCTCCTCGTCGAAATCAAAAGG	23H-RNA	Y105C5A.14		2.79467	0	0.430181	0	4.64794	0	0	0		0	0	0	0	0	0	0	0.360417
TCTCTGTGTGCTGGTAAGTGGA	23H-RNA	Y57G11C.51		2.79467	0	0	0	13.9438	0	0	0		0	0	0	0	0	0	0	0
TCTGAGATGTCTTCACAATTC	23H-RNA	F43E2.6		2.79467	0	0.430181	0	4.64794	0	0	0		0	0	0	0	0	5.18806	0.222818	0
TGAAAGGATCGGGACGATTAGG	23H-RNA	ChrX_intergenic1		2.79467	0	0	0.537413	0	0	0	0		0	0	0	0	0	0	0	0
TGACATCCCTTCTGATCGTGGA	23H-RNA	E01G4.7		2.79467	9.19093	0.645272	0.358275	46.4794	21.7063	0.758747	0.424445		0	0	0.19354	0.324785	0	0	0.222818	0
TGCCGATGTTTCTGAGATGTC	23H-RNA	F43E2.6		2.79467	4.59547	1.07545	1.07483	9.29587	28.9417	0.379373	0.636668		7.71546	0	0.58062	1.13675	4.77791	10.3761	0.668454	0.540626
TGCTTTCCTCATCTCTGATCTTT	23H-RNA	F55A4.9, rncs-1		2.79467	0	0	0.179138	69.7191	14.4709	0.379373	0.636668		0	0	0	0.324785	0	0	0.445636	0
TGGACAAGTTCAGCGCGCGAACC	23H-RNA	F39E9.29_region		2.79467	4.59547	0	0	0	14.4709	0	0		0	0	0	0	0	0	0	0
TGTCCCATATCGGTTTGATCTCC	23H-RNA	dnj-27_element		2.79467	4.59547	0.645272	0.179138	4.64794	7.23544	0.56906	0		15.4309	15.6075	0	0	33.4454	25.9403	0	0
TGTTCGTCCTCCATACATTGCC	23H-RNA	C36A4.14		2.79467	0	0	0	9.29587	0	0	0		0	0	0	0	0	0	0	0
TGTTTCTGAGATGTCTTCACAAT	23H-RNA	F43E2.6		2.79467	0	0	0	4.64794	0	0.379373	0		0	0	0	0	0	0	0	0
TGTTTGATACCTGGACTCTTTCC	23H-RNA	E01G4.7		2.79467	13.7864	1.50563	1.4331	18.5917	7.23544	1.32781	2.75889		3.85773	15.6075	1.16124	0.162393	0	5.18806	1.55973	0.901043
TTAAACGCAGCGGCGCGCGGAAC	23H-RNA	PALTA3		2.79467	4.59547	0.215091	0.179138	13.9438	14.4709	0.189687	0		0	10.405	0.38708	0	14.3337	10.3761	0	0.360417
TTACGAAGTGGGATTGGAAAATC	23H-RNA	F52G3.8		2.79467	0	0.430181	0.537413	13.9438	0	0	0		7.71546	10.405	0.77416	0.324785	4.77791	5.18806	0	0.360417
TTCCCGCATTTTTTGTAGATCA	23H-RNA	CELE14B		2.79467	9.19093	0	0	13.9438	0	0.189687	0		3.85773	0	0.38708	0	19.1116	15.5642	0	0
TTCTACATATCCAACGGAGGAAC	23H-RNA	Y17D7C.3		2.79467	9.19093	0.215091	0	0	14.4709	0.189687	0.212223		0	0	0	0.162393	9.55582	0	0	0
TTTAGTGACTCTGGCCGTTCACC	23H-RNA	TTTAGTGACTCTGGCCGTTCACC_repeat		2.79467	0	0	0	0	0	0	0		0	0	0	0	0	0	0	0
TTTCTGAGATGTCTTCACAATTCT	23H-RNA	F43E2.6		2.79467	4.59547	0.215091	0.179138	37.1835	14.4709	0.948434	0.636668		0	0	0.19354	0	4.77791	5.18806	0.445636	0.540626
TTTCTGTCATCACCCGCGGGGCC	23H-RNA	dnj-27_element		2.79467	0	0	0	0	0	0	0		0	5.20251	0	0	0	0	0	0
TTTGGCCAAGCGGACTGGAGCAC	23H-RNA	F55A4.9, rncs-1		2.79467	0	0	0	0	0	0	0.424445		0	0	0.19354	0	9.55582	5.18806	0	0
TTTTCGGGGTACGGTATCTAAT	23H-RNA	ChrIII_hairpin2		2.79467	4.59547	0	0.179138	23.2397	0	0	0		0	0	0.19354	0	0	5.18806	0	0
AAAAAAGAACTGAAGAGAGTG	23H-RNA	C05E7.1, C05E7.t3		0	0	0	0	0	0	0	0		0	0	0	0	0	0	0	0
AAAAAATATGGATAAGATGATG	23H-RNA	F55A4.9, rncs-1		0	0	0	0	0	0	0	0		0	0	0	0	0	0	0	0
AAAAATGTAGAAGCTGTGGGCA	23H-RNA	E01G4.5		0	0	0	0	0	0	0	0		0	0	0	0	0	0	0	0
AAAAATTCAAATTTAACTCCGTG	23H-RNA	Y69A2AR.16_hairpin		0	0	0	0	0	0	0	0		0	0	0	0	0	0	0	0
AAAACCACGAATCCTAACCACT	23H-RNA	tRNA		0	0	0	0	0	0	0	0		0	0	0	0	4.77791	0	0	0
AAAAGAACTGAAGAGAGTGGGA	23H-RNA	other		0	0	0	0	0	0	0	0		0	0	0	0	0	0	0	0
AAAAGAAGACTGATCTCGGGCG	23H-RNA	Y65A5A.26, Y65A5A.t3, Y7A9D.66, Y7A9D.t3		0	0	0	0	0	0	0	0		0	0	0	0	0	0	0	0
AAAAGAGTTGATATATGTGGGC	23H-RNA	Y59H11AR.6		0	0	0	0	0	0	0	0		0	0	0	0	0	0	0	0
AAAATAAAATGTTCTAGCTCTC	23H-RNA	E01G4.5		0	0	0	0	0	0	0	0		0	0	0	0	0	0	0	0
AAAATGGACGACGTGCTCGACAG	23H-RNA	C14B1.7		0	0	0	0.179138	0	0	0	0		0	0	0	0	0	0	0	0
AAAATTAGCCGCCTACACAACA	23H-RNA	T05E12.10		0	0	0	0	0	0	0	0		0	0	0	0	0	0	0	0
AAAATTCAAATTTAACTCCGTG	23H-RNA	Y69A2AR.16_hairpin		0	0	0	0	0	0	0	0		0	0	0	0	0	0	0	0
AAACAACCCTGAACCAGACGTA	23H-RNA	F31C3.11, rrn-2.1, rrn-2.1_element		0	0	9.67908	7.70291	9.29587	7.23544	8.72559	7.85223		15.4309	15.6075	5.8062	4.05981	9.55582	5.18806	6.68454	6.66772
AAACAACCCTGAACCAGACGTAC	23H-RNA	F31C3.11, rrn-2.1		0	0	2.15091	0.895688	0	0	0.948434	1.69778		3.85773	10.405	0.9677	0.487178	0	10.3761	0.668454	1.44167
AAACATTCGGCAATGGGGTACCC	23H-RNA	Y37E3.30		0	0	0	0	0	0	0	0.212223		0	0	0	0	0	0	0	0
AAACCACGAATCCTAACCACT	23H-RNA	tRNA		0	0	0	0	0	0	0	0		0	0	0	0	0	0	0	0
AAACCACGAATCCTAACCACTA	23H-RNA	tRNA		0	0	0	0	0	0	0	0		0	0	0	0	0	0	0	0
AAACCACGAATCCTAACCACTAG	23H-RNA	tRNA		0	0	0	0	0	0	0	0		0	0	0	0	0	0	0	0
AAACCGCCGGAATTTTCAGCC	23H-RNA	other		0	0	0	0	9.29587	28.9417	0.189687	0		0	15.6075	0	0	0	0	0	0
AAACCGTGCGGCAGTTGCAGAAA	23H-RNA	DNA-8-1		0	0	0	0	4.64794	0	0	0		0	0	0	0	0	0	0	0
AAACGGAATCGCTGTCCCGGAC	23H-RNA	F39E9.7		0	9.19093	0	0	0	0	0	0		0	0	0	0	0	0	0.222818	0
AAACTGGATTGACGAGCATCGAG	23H-RNA	F55A4.9, rncs-1		0	0	0.215091	0	0	0	0	0		0	0	0	0	0	0	0	0
AAACTGTATTACGGTGGAGTCT	23H-RNA	other		0	0	0.215091	0	4.64794	0	0	0		0	0	0	0.162393	0	0	0	0
AAAGAACAAGCCGTGGGCAAGCA	23H-RNA	F39E9.7, F55A4.4		0	0	0	0	0	0	0	0		0	0	0	0	0	0	0	0
AAAGAATCCATTGTCCAGCTCC	23H-RNA	F55A4.9, rncs-1		0	0	0	0	0	0	0	0		0	0	0	0	0	0	0	0
AAAGAATCCATTGTCCAGCTCCA	23H-RNA	F55A4.9, rncs-1		0	0	0	0	0	0	0	0		0	0	0	0	0	0	0	0
AAAGGATCACGAGGCTCTTCCTG	23H-RNA	Unknown_IR1		0	0	0	0	0	0	0	0		0	0	0	0	0	0	0	0
AAAGTAAATGCGTTCGGGGGGAA	23H-RNA	Y57G11B.t1		0	0	0	0	0	0	0	0		0	0	0	0	0	0	0	0
AAAGTTGATGGACGGCGAGATT	23H-RNA	PALTTAA1		0	0	0	0	0	0	0	0		0	0	0	0	0	0	0	0
AAATCACCGTCTAATTTTGAGT	23H-RNA	other		0	9.19093	0.215091	0	0	0	0	0		0	10.405	0	0	14.3337	5.18806	0	0
AAATCGGAAACTCAAAGACCAC	23H-RNA	Y17D7C.3		0	0	0	0	0	0	0	0		0	0	0	0	0	0	0	0
AAATCGGAAACTCAAAGACCACA	23H-RNA	Y17D7C.3		0	0	0	0	0	0	0	0		0	5.20251	0	0	0	0	0	0.180209
AAATCGGAAACTCAAAGACCACAC	23H-RNA	Y17D7C.3		0	0	0	0	4.64794	0	0	0		0	0	0	0.162393	0	0	0	0
AAATTCAAATTTAACTCCGTG	23H-RNA	Y69A2AR.16_hairpin		0	0	0.645272	0	0	0	0	0		0	0	0	0	0	5.18806	0	0
AAATTCAAATTTAACTCCGTGA	23H-RNA	Y69A2AR.16_hairpin		0	0	0.215091	0.179138	0	0	0.758747	0		3.85773	0	0.19354	0	0	10.3761	0	0
AAATTCAAATTTAACTCCGTGAC	23H-RNA	Y69A2AR.16_hairpin		0	0	0	0.179138	4.64794	0	0	0.212223		3.85773	0	0	0.162393	4.77791	0	0	0
AAATTGTCGGCCGCCGTGAAAAC	23H-RNA	other		0	0	0	0.358275	0	14.4709	0.189687	0		0	0	0.19354	0	0	0	0.222818	0
AAATTGTCGGCCGCCGTGGAA	23H-RNA	Unknown_hairpin_RE2		0	0	0	0	4.64794	7.23544	0	0.424445		0	0	0	0	0	0	0	0
AAATTGTCGGCCGCCGTGGAAA	23H-RNA	Unknown_hairpin_RE2		0	13.7864	0	0	4.64794	0	0	0		3.85773	0	0.38708	0	0	0	0	0
AAATTGTCGGCCGCCGTGGAAAA	23H-RNA	other		0	0	0	0	13.9438	7.23544	0	0		0	0	0	0	4.77791	0	0	0
AAATTGTCGGCCGCTGTGGAAAC	23H-RNA	ChrV_unknown_hairpin1		0	9.19093	0	0	18.5917	14.4709	0	0.212223		0	10.405	0	0.162393	9.55582	5.18806	0.668454	0.360417
AACAACCCTGAACCAGACGTA	23H-RNA	F31C3.11, rrn-2.1		0	0	0.215091	0	0	0	0.379373	0		0	0	0.19354	0.162393	0	0	0.222818	0
AACAACCCTGAACCAGACGTAC	23H-RNA	F31C3.11, rrn-2.1, rrn-2.1_element		0	0	1.07545	0.537413	4.64794	0	1.89687	1.06111		3.85773	5.20251	1.9354	0.487178	0	5.18806	0.445636	1.62188
AACAACGAAGCTCCGAAATAACG	23H-RNA	PALTTAA1		0	4.59547	0	0	0	0	0	0		0	0	0	0	0	0	0	0.180209
AACCCTGAACCAGACGTACCAA	23H-RNA	F31C3.11, rrn-2.1		0	0	0	0	0	0	0	0		0	0	0	0	0	0	0	0
AACCGGACCCTGCCTCTTCATCA	23H-RNA	Y57G11C.1145_hairpin		0	4.59547	0	0	9.29587	0	0	0		0	0	0	0	0	0	0.222818	0.360417
AACGAGACCGCTGAAAAAGTTT	23H-RNA	PAL5A		0	0	0	0	0	0	0	0		0	0	0	0	0	0	0	0
AACTGCCGCACGGTTTCGAAACT	23H-RNA	DNA-8-1		0	0	0	0	4.64794	14.4709	0	0		0	0	0	0	4.77791	0	0	0
AACTGCCGCACGGTTTTGAAACT	23H-RNA	DNA-8-1		0	9.19093	0	0	9.29587	0	0	0		0	0	0	0	0	0	0	0
AACTTAAAACCAACAATGAACA	23H-RNA	Y36E3A.2		0	0	0	0	0	0	0	0		0	0	0	0	0	0	0	0
AACTTCTTCCACGCCATCATCC	23H-RNA	Y57G11C.1145_hairpin		0	0	0.215091	0.179138	9.29587	14.4709	0.379373	1.48556		0	5.20251	0.19354	0	4.77791	15.5642	0	0.720835
AAGAACAAGCCGTGGGCAAGCA	23H-RNA	F39E9.7, F55A4.4		0	0	0.215091	0.179138	0	0	0.379373	0		0	0	0	0.162393	0	15.5642	0.222818	0
AAGAACAAGCCGTGGGCAAGCAC	23H-RNA	F39E9.7, F55A4.4		0	0	0	0	0	0	0	0		0	0	0	0	0	0	0.222818	0
AAGAAGAAGCATCACGTCGTTT	23H-RNA	Y17D7C.3		0	4.59547	0	0	4.64794	0	0	0		0	0	0	0	0	0	0.445636	0
AAGAATCCATTGTCCAGCTCC	23H-RNA	F55A4.9, rncs-1		0	0	0	0	0	0	0	0		0	0	0	0	0	0	0	0
AAGACATCTCAGAAACATCGG	23H-RNA	F43E2.6		0	0	0	0	0	0	0	0		0	0	0	0	0	0	0	0.180209
AAGACATCTCAGAAACATCGGC	23H-RNA	F43E2.6		0	4.59547	0	0	4.64794	0	0.189687	1.06111		3.85773	0	0	0	0	0	0	0
AAGACATCTCAGAAACATCGGCA	23H-RNA	F43E2.6		0	0	0	0.179138	9.29587	0	0.189687	0.636668		0	0	0.19354	0	4.77791	0	0.222818	0
AAGACATCTCAGAAACATCGGCAA	23H-RNA	F43E2.6		0	0	0	0	0	0	0	0		0	0	0	0	0	0	0	0
AAGAGCCTCGTGATCCTTTGG	23H-RNA	Unknown_IR1		0	0	0	0	0	0	0.379373	0		0	0	0	0	0	0	0	0
AAGAGCCTCGTGATCCTTTGGAG	23H-RNA	Unknown_IR1		0	0	0	0	0	0	0	0.212223		0	0	0	0	0	0	0	0
AAGCACGCCGTCTCTGAGGGAAC	23H-RNA	other		0	0	0	0.179138	0	0	0	0		0	0	0	0.162393	0	0	0	0.180209
AAGCGACACGTTCTACGAGGG	23H-RNA	F55A4.9, rncs-1		0	0	0	0	0	0	0	0		0	0	0	0	0	0	0	0
AAGCGACACGTTCTACGAGGGA	23H-RNA	F55A4.9, rncs-1		0	0	0	0	0	14.4709	0	0		0	0	0	0	0	0	0	0
AAGCGGACTGGAGCACATTGGA	23H-RNA	F55A4.9, rncs-1		0	0	0	0	0	0	0	0		0	0	0	0	0	0	0	0
AAGGACGGAAAGAAGAGACGC	23H-RNA	F55G1.3, his-62		0	0	0	0	0	0	0	0		0	0	0	0.324785	0	0	0	0
AAGGATCGATTCATAAATTTTGA	23H-RNA	AAGGATCGATTCATAAATTTTGA_Repeat		0	0	0	0	0	0	0	0		0	0	0	0	0	0	0	0
AAGGCGCGCTCGAAGAGCCGAGA	23H-RNA	ChrIII_hairpin1		0	4.59547	0.860363	0.537413	69.7191	137.473	0.948434	1.91		7.71546	5.20251	0.77416	0.162393	38.2233	15.5642	1.33691	1.26146
AAGTATGATTGATATTGGGAAC	23H-RNA	Y59H11AR.6		0	0	0	0	0	0	0	0		0	0	0.19354	0	0	0	0	0
AAGTATGATTGATATTGGGAACA	23H-RNA	Y59H11AR.6		0	0	0	0	0	0	0	0		0	0	0.38708	0	0	0	0	0
AAGTGCCACCGTGTCTGGTCTCC	23H-RNA	ZK402.3		0	0	0	0	0	0	0.189687	0.212223		0	0	0	0	0	0	0	0
AATAAAAACAATGGACAACTG	23H-RNA	Y59H11AR.6		0	0	0	0	0	0	0	0		0	0	0	0	0	0	0	0
AATACCACGGGCGATGCCAAATC	23H-RNA	T05E12.8		0	0	0.215091	0.179138	0	14.4709	0.379373	0.212223		0	0	0	0	4.77791	0	0	0.180209
AATACCTAACGAGACCCAACTTT	23H-RNA	PALTA3		0	0	0	0	0	0	0	0		0	0	0	0	0	0	0	0
AATACGCCCATTTCTGCAACTG	23H-RNA	DNA-8-1		0	0	0	0	0	0	0	0		0	0	0	0	0	0	0	0
AATATTTATTTCGCATCCCTCCC	23H-RNA	Y57G11C.36, Y57G11C.51		0	0	0	0	4.64794	0	0	0		0	5.20251	0	0.162393	0	0	0	0
AATATTTATTTCGCATCCCTCCCC	23H-RNA	Y57G11C.36, Y57G11C.51		0	0	0	0	0	0	0	0		0	0	0	0	0	0	0	0
AATCGGAAACTCAAAGACCAC	23H-RNA	Y17D7C.3		0	0	0.430181	0.179138	0	0	0.379373	0.212223		0	0	0.19354	0.324785	0	0	0.668454	0
AATCGGAAACTCAAAGACCACA	23H-RNA	Y17D7C.3		0	0	0.430181	0.537413	0	7.23544	0.379373	0.212223		7.71546	5.20251	0.9677	0	0	0	1.11409	0.360417
AATCTACTTAAATCAACGAAT	23H-RNA	mek-2, Y54E10BL.6, Y71F9AL.1		0	0	0	0	0	0	0	0		0	0	0	0	0	0	0	0
AATGAAACGAGTGCTGCGAAAAC	23H-RNA	Y116A8B.1		0	0	0	0.179138	4.64794	0	0	0		0	0	0	0	0	0	0	0
AATGACTACTGTAGCGCTTGTG	23H-RNA	CELE1		0	0	0	0	0	0	0	0		0	0	0	0	0	0	0	0
AATTCCAAAACTGCTGTTTCCCC	23H-RNA	Y59H11AR.6		0	0	0	0	0	0	0	0		0	0	0	0	0	0	0	0
AATTCCACTTGGGGTAAATTCG	23H-RNA	C36A4.14		0	0	0	0	0	0	0	0		0	0	0	0	0	0	0	0
AATTCTCGTTCTCTCCACACAC	23H-RNA	R119.7, rnp-8		0	0	0	0	0	0	0	0		0	0	0	0	0	0	0	0
AATTCTCTCGTAGAACGTGTCG	23H-RNA	F55A4.9, rncs-1		0	0	0	0	0	0	0.189687	0.212223		0	0	0.19354	0.162393	0	0	0	0
AATTCTCTCGTAGAACGTGTCGC	23H-RNA	F55A4.9, rncs-1		0	0	0	0.358275	0	0	0.189687	0		0	0	0	0.162393	0	0	0	0.540626
AATTCTCTCGTAGAACGTGTCGCT	23H-RNA	F55A4.9, rncs-1		0	0	0	0	9.29587	14.4709	0.56906	0.212223		0	0	0	0	14.3337	0	0	0.180209
AATTGTCGGCCGCCGTGGAAAA	23H-RNA	other		0	0	0	0	0	0	0	0		0	0	0	0	0	0	0	0.180209
AATTGTCGGCCGCCGTGGAAAAC	23H-RNA	other		0	0	0	0	13.9438	7.23544	0	0		0	0	0	0	0	0	0	0
AATTGTCGGCCGCTGTGGAAACC	23H-RNA	ChrV_unknown_hairpin1		0	0	0	0	4.64794	7.23544	0	0		0	0	0	0	0	0	0	0
AATTTTGCCTTTTCCCCGTGAGT	23H-RNA	PALTA3		0	0	0	0	0	0	0	0		0	0	0	0	0	0	0	0
ACAACCCTGAACCAGACGTACC	23H-RNA	F31C3.11, rrn-2.1, rrn-2.1_element		0	0	0	0	0	14.4709	0	0		0	0	0.38708	0.162393	0	0	0	0
ACAACCCTGAACCAGACGTACCA	23H-RNA	F31C3.11, rrn-2.1		0	0	0	0	0	0	0	0		0	0	0	0	0	0	0	0
ACATCTCAGAAACATCGGCAA	23H-RNA	F43E2.6		0	0	0	0	4.64794	21.7063	0	0.212223		3.85773	0	0.58062	0	0	0	0.222818	0.180209
ACATCTCAGAAACATCGGCAAA	23H-RNA	F43E2.6		0	9.19093	0	0	4.64794	0	0	0.424445		0	0	0	0	0	0	0.222818	0.360417
ACATCTCAGAAACATCGGCAAATG	23H-RNA	F43E2.6		0	9.19093	0.215091	0	13.9438	7.23544	1.13812	0.212223		0	5.20251	0	0	0	5.18806	0.222818	0.180209
ACATTTTCGGCCAGTGGGGCACA	23H-RNA	other		0	0	0	0	0	0	0	0		0	5.20251	0	0	0	0	0	0
ACCAATTGTACTTTGTAGGAGCC	23H-RNA	Y116A8B.1		0	0	0.645272	0.358275	9.29587	0	0.379373	0		0	0	0	0.487178	0	0	0.445636	0
ACCACTGAACCACCGATGCGA	23H-RNA	other		0	0	0	0	0	0	0	0		0	0	0	0	0	0	0	0
ACCACTTCCGCAGACGCTACA	23H-RNA	Y37E3.30		0	0	0	0	0	0	0	0		0	0	0	0	0	0	0	0
ACCACTTCCGCAGACGCTACAA	23H-RNA	Y37E3.30		0	0	0	0	0	0	0	0		0	0	0	0	0	0	0	0
ACCACTTCCGCAGACGCTACAAC	23H-RNA	Y37E3.30		0	0	0	0	0	0	0	0		0	0	0	0	0	0	0	0.180209
ACCATCCGGATGCTTCATGTTTC	23H-RNA	E01G4.7		0	0	0	0	0	0	0	0		0	0	0	0	0	0	0	0
ACCGAGCTCACAATGATATTGC	23H-RNA	F52G3.8		0	0	0	0	0	0	0	0		0	0	0	0	0	0	0	0
ACCGGGTTAGTATTTTCAAGCA	23H-RNA	ZK1236.8		0	0	0	0	0	0	0	0		0	0	0	0	0	0	0	0
ACCGGTACAGAGAGTGTGGATA	23H-RNA	lin-29, other, W03C9.4		0	0	0	0	0	0	0	0		0	0	0	0	0	0	0	0
ACCTACGTACAACACCGGGCTC	23H-RNA	T05E12.8		0	4.59547	0	0	0	0	0	0.212223		0	0	0	0	0	0	0	0.180209
ACCTGAACTTTTTGGATCAACA	23H-RNA	T05E12.10		0	0	0.215091	0.179138	0	7.23544	0	0		0	5.20251	0.19354	0.162393	0	0	0	0
ACGACGACGATGGCTGCGGCGAG	23H-RNA	Y57G11C.1145_hairpin		0	0	0.215091	0	0	0	0.379373	0.212223		0	0	0	0	0	0	0	0
ACGACGATGGCTGCGGCGAGG	23H-RNA	Y57G11C.1145_hairpin		0	0	0	0	0	0	0	0		0	0	0	0	0	0	0	0
ACGACGATGGCTGCGGCGAGGAT	23H-RNA	Y57G11C.1145_hairpin		0	0	0.215091	0.71655	0	0	0	0		0	0	0.19354	0.324785	0	0	0	0.360417
ACGATGGATTCTTTGGAGCAACC	23H-RNA	F55A4.9, rncs-1		0	9.19093	0.215091	0	0	0	0.189687	0.212223		0	0	0	0	0	0	0	0
ACGATGGCTGCGGCGAGGATGAT	23H-RNA	Y57G11C.1145_hairpin		0	0	0	0	0	0	0	0		0	0	0	0	0	0	0	0
ACGATTTTGAACGTATAGACCCA	23H-RNA	Y29A2AR.16		0	0	0	0	0	0	0	0		0	0	0	0	0	0	0	0
ACGGAGTTAAATTTGAATTTTT	23H-RNA	Y69A2AR.16_hairpin		0	4.59547	0.860363	0.537413	9.29587	7.23544	0.56906	0.424445		7.71546	10.405	0.58062	0.162393	14.3337	10.3761	0	0.901043
ACGGAGTTAAATTTGAATTTTTT	23H-RNA	Y69A2AR.16_hairpin		0	0	0	0	0	0	0	0		0	0	0	0	0	15.5642	0	0
ACGGCAACTCGGTCCAAAACCA	23H-RNA	PALNN1		0	0	0	0	0	7.23544	0	0		0	0	0	0	0	0	0	0
ACGTGTCGCTTCGTCATCTGA	23H-RNA	F55A4.9, rncs-1		0	0	0	0	0	0	0	0		0	0	0	0.162393	0	0	0	0
ACGTGTCGCTTCGTCATCTGATG	23H-RNA	F55A4.9, rncs-1		0	0	0	0.179138	0	14.4709	0	0		0	0	0.19354	0	0	0	0	0.360417
ACGTGTTCCAGCATTCTTCGA	23H-RNA	Y37E3.30		0	0	0	0	0	0	0	0.424445		0	0	0	0	0	0	0	0
ACTATCTACACTCTCTGTACCGG	23H-RNA	Unknown_RE2		0	0	0	0	0	0	0	0		0	0	0	0	0	0	0	0
ACTCCACCGTAATACAGTTTTCC	23H-RNA	other		0	0	0	0	4.64794	0	0	0		0	0	0.19354	0	0	0	0	0
ACTGCCGCACGGTTTTGAAAC	23H-RNA	DNA-8-1		0	0	0	0	0	0	0	0		0	0	0	0	0	0	0	0
ACTGCCGCACGGTTTTGAAACTG	23H-RNA	DNA-8-1		0	0	0	0	4.64794	0	0	0		0	0	0	0	0	0	0	0
ACTGCTCTACTGAATACAACACC	23H-RNA	F31C3.10, F31C3.9, rrn-3.1, rrn-3.56		0	0	0	0	0	0	0	0		0	0	0	0	0	0	0	0
ACTTCTTCCACGCCATCATCC	23H-RNA	Y57G11C.1145_hairpin		0	0	0	0	0	7.23544	0	0		0	0	0	0	0	0	0	0
ACTTCTTCCACGCCATCATCCACA	23H-RNA	Y57G11C.1145_hairpin		0	0	0.215091	0	9.29587	7.23544	0.56906	0		0	0	0	0	0	0	0	0.180209
ACTTTTTCAGCGGTCTCGTTATA	23H-RNA	PAL5A		0	0	0	0	0	0	0	0		0	0	0	0	0	0	0.445636	0
ACTTTTTCAGCGGTCTCGTTATG	23H-RNA	PAL5A		0	0	0	0	0	0	0	0		0	0	0	0	0	0	0	0
AGAAACTTGGACTTTTTCGCTGG	23H-RNA	F55A4.9, rncs-1		0	0	0	0	0	0	0	0		0	0	0	0	0	0	0	0
AGAACGTGTCGCTTCGTCATCTG	23H-RNA	F55A4.9, rncs-1		0	0	0	0	0	0	0	0		0	0	0	0	0	0	0	0.180209
AGAAGACCATTAGACAGCACCC	23H-RNA	K06C4.23, other		0	0	0	0	0	0	0	0		0	0	0	0	0	0	0	0
AGACATCTCAGAAACATCGGC	23H-RNA	F43E2.6		0	0	0	0	4.64794	0	0.189687	0.212223		0	0	0.19354	0	0	0	0	0
AGACATCTCAGAAACATCGGCA	23H-RNA	F43E2.6		0	0	0	0	0	0	0	0		0	0	0	0	0	0	0	0
AGACATCTCAGAAACATCGGCAA	23H-RNA	F43E2.6		0	0	0.215091	0	0	0	0	0		0	0	0	0	0	0	0	0
AGACATCTCAGAAACATCGGCAAA	23H-RNA	F43E2.6		0	0	0	0	0	0	0	0		0	0	0	0	0	0	0	0
AGACCACTTCCGCAGACGCTACA	23H-RNA	Y37E3.30		0	0	0	0	0	0	0	0		0	0	0	0	0	0	0	0
AGACGCAGGGCTGGTCGCGATG	23H-RNA	Y57G11C.51		0	0	0	0.179138	0	7.23544	0.379373	0		0	5.20251	0	0	0	0	0	0
AGACGCGCGCACTCCCAACTCG	23H-RNA	TC5A		0	4.59547	0.215091	1.07483	0	14.4709	0.948434	0.84889		3.85773	0	0.77416	0.811963	0	5.18806	0.891272	0.901043
AGAGCTTATGCCCTATGTATGG	23H-RNA	F31C3.10, F31C3.9, rrn-3.1, rrn-3.56		0	0	0.645272	1.07483	0	0	0.379373	1.27334		0	0	0.77416	0.974355	0	10.3761	1.78254	0.360417
AGAGGTCCAAGTAAGATGATA	23H-RNA	F39E9.7		0	0	0.860363	0.179138	0	0	0.189687	0.212223		0	5.20251	0	0	0	5.18806	0	0.540626
AGAGGTCCAAGTAAGATGATAG	23H-RNA	F39E9.7		0	0	0	0	0	0	0	0		0	0	0	0	4.77791	0	0	0
AGAGGTCCAAGTAAGATGATAGC	23H-RNA	F39E9.7		0	0	0.215091	0	0	0	0	0		0	0	0	0.162393	0	0	0	0
AGAGTGACAGACATCCGGGAC	23H-RNA	Unknown_RE2		0	0	0	0	0	0	0	0		0	0	0	0	0	0	0	0
AGAGTGACAGACATCCGGGACC	23H-RNA	Unknown_RE2		0	0	0	0	0	0	0	0		0	0	0	0	0	0	0	0
AGAGTGACAGACATCCGGGACCC	23H-RNA	Unknown_RE2		0	0	0	0	0	0	0	0		0	0	0	0	0	0	0	0
AGAGTGACAGACATCCGGGACCT	23H-RNA	Unknown_RE2		0	0	0	0	0	0	0	0		0	0	0	0	0	0	0	0
AGAGTGTAGTCAGCTGAAGAGAC	23H-RNA	rft-2, Y47D7A.14_IR, Y47D7A.14_IR_element		0	0	0	0	0	0	0	0		0	0	0	0	0	0	0	0
AGCAAGAGGAAGAGAAACAAAAG	23H-RNA	F19B2.5		0	0	0	0	0	0	0	0		0	0	0	0	0	0	0	0
AGCACTAATAGAGAATATACGGT	23H-RNA	Unknown_RE6		0	0	0	0	0	0	0	0		0	0	0	0	0	0	0	0
AGCAGAAACTATATGGAACAT	23H-RNA	F39E9.29_region		0	0	0	0.179138	0	0	0	0		0	0	0.19354	0.487178	4.77791	0	0	0.180209
AGCAGACGCTCATGACCACTT	23H-RNA	Y17D7B.4		0	0	0	0	0	0	0	0		0	0	0	0	0	0	0	0
AGCATCGAGAAACTTGGACTTTT	23H-RNA	F55A4.9, rncs-1		0	0	0	0.179138	0	0	0	0		0	0	0	0	0	0	0	0
AGCCAATATCGGACGATGAAGC	23H-RNA	other		0	13.7864	0	0	13.9438	0	0	0		3.85773	0	0.19354	0	4.77791	5.18806	0.222818	0
AGCCGTGGTCGATGCTGAAAG	23H-RNA	F55A4.9, rncs-1		0	0	0	0	0	0	0	0		0	0	0	0	0	0	0	0
AGCCGTGGTCGATGCTGAAAGG	23H-RNA	F55A4.9, rncs-1		0	0	0.430181	0	0	0	0.379373	0.424445		0	0	0.19354	0.162393	0	0	0	0
AGCCGTGGTCGATGCTGAAAGGT	23H-RNA	F55A4.9, rncs-1		0	0	0.215091	0.179138	0	0	0.379373	0.212223		0	0	0.38708	0.162393	0	0	0.668454	0
AGCCTCGTGATCCTTTGGAGCTG	23H-RNA	Unknown_IR1		0	0	0	0	0	0	0	0		0	0	0	0	0	0	0	0
AGCGAAAACTACAGTAAGAACT	23H-RNA	PALTA4		0	0	0	0	0	0	0	0		0	0	0	0	0	0	0	0
AGCGAAAACTACAGTAATTCTT	23H-RNA	CELE1		0	0	0	0	0	0	0	0		0	0	0	0	0	0	0	0
AGCGAAAACTACAGTAATTCTTT	23H-RNA	CELE1		0	0	0	0	0	0	0	0		0	0	0	0	0	0	0	0
AGCGACACGTTCTACGAGGGA	23H-RNA	F55A4.9, rncs-1		0	0	0	0	0	0	0	0		0	0	0	0	0	0	0	0
AGCGACACGTTCTACGAGGGAAT	23H-RNA	F55A4.9, rncs-1		0	0	0	0.179138	0	0	0	0		0	0	0.19354	0	0	0	0	0
AGCGGTCTCGTTATGAAAATCAG	23H-RNA	PAL5A		0	0	0	0	0	0	0	0		0	0	0	0	0	0	0	0
AGCTAGCTTCACAACAATTGACC	23H-RNA	W03D2.15		0	0	0	0	0	0	0	0		0	0	0	0	0	0	0	0
AGGATCAGAACATCAGGAAGAGC	23H-RNA	Unknown_IR1		0	0	0	0	0	0	0	0		0	0	0	0	0	0	0	0
AGGCACAGTTCTGTGGGCGGGG	23H-RNA	24F12A.4, H15N14.4, H37A05.4, Y24F12A.3		0	0	0	0	0	14.4709	0	0		0	0	0	0	0	0	0	0
AGGCACAGTTCTGTGGGCGGGGC	23H-RNA	H15N14.4, H37A05.4, Y24F12A.3, Y24F12A.4		0	0	0	0	0	0	0	0		0	0	0	0	0	0	0	0
AGGCACATTTTAAGTCGGTAGGC	23H-RNA	gmps-1, M106.4		0	0	0	0	4.64794	0	0	0		0	0	0	0	0	0	0	0
AGGTACAGAACTGTGGGCGGGGC	23H-RNA	Y24F12A.3, Y24F12A.4		0	0	0	0	0	0	0	0		0	0	0	0	0	0	0	0
AGTAATATACCGCTACACCAACC	23H-RNA	ChrII_intergenic1		0	0	0	0	0	0	0.379373	0		0	0	0	0	0	0	0	0
AGTGACAGACATCCGGGACCT	23H-RNA	Unknown_RE2		0	0	0	0	0	0	0	0		0	0	0	0	0	0	0	0
AGTGAGGCTCAGGATTTTGAGTG	23H-RNA	M4.2, puf-4		0	0	0	0	0	0	0	0		0	0	0	0	0	0	0	0
AGTGGAGTGGATGACGACGACGAT	23H-RNA	Y57G11C.1145_hairpin		0	0	0.860363	0	23.2397	14.4709	0.758747	1.69778		0	5.20251	0.58062	0.324785	4.77791	10.3761	0.891272	2.52292
AGTGGGCCGAGCGATTCGCTGA	23H-RNA	Y116A8C.27		0	0	0	0	0	0	0	0		0	0	0	0	0	0	0	0
AGTGGGCCGAGCGATTCGCTGAT	23H-RNA	Y116A8C.27		0	0	0.215091	0	0	7.23544	0	0		0	0	0	0	0	0	0.222818	0
AGTGGTTCGTGGCTTCCAAATCC	23H-RNA	T05E12.8		0	0	0.430181	0.179138	0	0	0	0		0	0	0	0	0	10.3761	0	0
AGTGTAGTCAGCTGAAGAGACA	23H-RNA	rft-2, Y47D7A.14_IR, Y47D7A.14_IR_element		0	0	0.215091	0	4.64794	7.23544	0	0		3.85773	0	0	0	4.77791	0	0	0.180209
AGTTCAACAGGTAGATCAAAAA	23H-RNA	TIR54TA1		0	0	0	0	0	0	0	0		0	0	0	0	0	0	0	0
AGTTCAAGTCTCTCGATGCTCG	23H-RNA	F55A4.9, rncs-1		0	0	0	0	0	0	0	0		0	0	0	0	0	0	0	0
AGTTGGTTGATGCTTGTCCGG	23H-RNA	F31C3.9, rrn-3.1		0	0	0.430181	1.07483	13.9438	0	0.948434	0.636668		0	15.6075	1.9354	0.324785	4.77791	0	0.445636	1.08125
ATAAATCGACGTTTCTTTCACAA	23H-RNA	hcp-1, ZK1055.1		0	0	0	0	0	0	0	0		0	0	0	0	0	0	0	0
ATAACGAGACCGCTGAAAAAGT	23H-RNA	PAL5A		0	0	0	0	0	0	0	0		0	0	0	0	0	0	0	0
ATAACGAGACCGCTGAAAAAGTT	23H-RNA	PAL5A		0	0	0	0	0	0	0	0		0	0	0	0	0	0	0	0
ATACAATGAAAACAACACTTTTG	23H-RNA	F23B2.9		0	0	0	0	0	0	0	0		0	0	0	0	0	0	0	0
ATACGGCTAGCCATATAAAGACC	23H-RNA	C36A4.14		0	0	0.215091	0	0	0	0	0		0	0	0	0	0	0	0	0
ATAGAGCGAGAATTAACAAGA	23H-RNA	DNA-8-1		0	0	0	0	0	0	0	0		0	0	0	0	0	0	0	0
ATAGAGCGAGAATTAACAAGAA	23H-RNA	DNA-8-1		0	0	0	0	0	0	0	0		0	0	0	0	0	0	0	0
ATAGCGGCGCGCGGAACCCATG	23H-RNA	PALTA3		0	0	0	0	0	0	0	0		0	0	0	0	0	0	0	0
ATATAGTGACTCTGGCCGTTCA	23H-RNA	ATATAGTGACTCTGGCCGTTCA_repeat		0	0	0	0	4.64794	0	0	0		0	0	0	0	0	0	0	0
ATATTTGGAACAGAAGCAAGA	23H-RNA	F19B2.5		0	0	0	0	4.64794	0	0.189687	0		0	0	0	0	0	5.18806	0.222818	0
ATATTTGGAACAGAAGCAAGAG	23H-RNA	F19B2.5		0	0	0	0	0	0	0	0		0	0	0	0	0	0	0	0
ATCACATAACTCCGCCCCCTGA	23H-RNA	other		0	0	0	0.179138	0	7.23544	0	0		0	0	0	0	0	0	0	0
ATCATCCTCGCCGCAGCCATCGT	23H-RNA	Y57G11C.1145_hairpin		0	0	0	0	0	0	0	0		0	0	0	0	0	0	0	0
ATCCACGACGGCCGACAATTTCC	23H-RNA	Unknown_hairpin_RE2		0	0	0	0	0	0	0	0		0	0	0	0	0	0	0	0
ATCCTCGCCGCAGCCATCGTCG	23H-RNA	Y57G11C.1145_hairpin		0	0	0	0	0	0	0	0		0	0	0	0	0	0	0	0
ATCCTCGCCGCAGCCATCGTCGT	23H-RNA	Y57G11C.1145_hairpin		0	0	0	0	0	0	0.379373	0		0	0	0.19354	0	0	0	0	0
ATCCTTGTACCAGTTATCTGCA	23H-RNA	K02E2.11		0	0	0	0	0	0	0	0		0	0	0	0	0	0	0	0
ATCCTTGTACCAGTTATCTGCAA	23H-RNA	K02E2.11		0	0	0	0	0	0	0	0		0	0	0	0	0	0	0	0
ATCGACACAAGCGCTACAGTAG	23H-RNA	CELE1		0	0	0	0	0	7.23544	0	0		0	0	0	0	0	0	0	0
ATCGACACAAGCGCTACAGTAGC	23H-RNA	CELE1		0	0	0	0	0	0	0	0		0	0	0	0	0	0	0	0
ATCGACACAAGCGCTACAGTAGT	23H-RNA	CELE1		0	0	0	0	0	0	0	0		0	0	0	0	0	0	0	0
ATCGGTGTGCTCGAGGGCTTGT	23H-RNA	Y37E3.30		0	4.59547	0.215091	0	4.64794	0	0	0		0	0	0	0.162393	0	0	0	0
ATCGTCGTCGTCATCCACTCCAC	23H-RNA	Y57G11C.1145_hairpin		0	0	0.430181	0.358275	0	0	0.379373	0.212223		0	0	0.77416	0	0	5.18806	0	0
ATCGTCGTCGTCATCCACTCCACC	23H-RNA	Y57G11C.1145_hairpin		0	0	0	0	0	0	0	0		0	0	0	0	0	0	0	0
ATCGTCGTCGTCATCCACTCCACT	23H-RNA	Y57G11C.1145_hairpin		0	0	0.215091	0	0	0	0	0		0	0	0	0	9.55582	10.3761	0.222818	0
ATCTACATGTGATCTACGCGAAT	23H-RNA	pcp-4, Unknown_RE8, Y116F11B.3, Y15E3A.3, Y6B3B.7, Y6B3B.9		0	0	0	0.179138	0	0	0	0		0	15.6075	0	0	0	0	0	0
ATCTACCTGTTGAACTTGACTCC	23H-RNA	TIR54TA1		0	0	0	0	0	0	0	0		0	0	0	0	0	0	0	0
ATCTACCTGTTGAACTTGACTCT	23H-RNA	F08B1.2, gcy-12		0	0	0	0	0	0	0.189687	0		0	0	0	0	4.77791	0	0	0
ATCTCAGAAACATCGGCAAAT	23H-RNA	F43E2.6		0	0	0	0.358275	18.5917	0	0	0		0	0	0	0.324785	0	5.18806	0	0
ATCTCAGAAACATCGGCAAATGG	23H-RNA	F43E2.6		0	0	0.860363	0.358275	27.8876	7.23544	1.32781	0.84889		0	0	0.19354	0.487178	0	0	0.668454	0.360417
ATCTCTGATCTTTTCCAATTCTT	23H-RNA	F55A4.9, rncs-1		0	0	0	0.358275	4.64794	7.23544	0	0		0	0	0	0	0	0	0	0
ATGAACCACAAGCGAAATCGCCC	23H-RNA	Y37E3.30		0	0	0	0	0	0	0.189687	0.212223		0	0	0	0	0	0	0	0
ATGAAGAGGCAGGGTCCGGTTG	23H-RNA	Y57G11C.1145_hairpin		0	9.19093	0.645272	0	9.29587	7.23544	0.948434	0		0	0	0	0	0	0	0.445636	0.360417
ATGAAGAGGCAGGGTCCGGTTGCG	23H-RNA	Y57G11C.1145_hairpin		0	0	0.215091	0	0	0	0	0		0	0	0	0	0	0	0	0
ATGACGACGACGATGGCTGCGGC	23H-RNA	Y57G11C.1145_hairpin		0	9.19093	0.215091	0	46.4794	57.8835	0.758747	0.212223		0	0	0	0.162393	4.77791	5.18806	0.445636	0
ATGATGTGGATGATGGCGTGGA	23H-RNA	Y57G11C.1145_hairpin		0	0	0	0	0	7.23544	0	0.636668		0	0	0	0	4.77791	0	0	0
ATGATTTATTGTTCCCGTAAT	23H-RNA	PALTA4		0	0	0	0	0	0	0	0		0	0	0	0	0	0	0	0
ATGCGGTTGTTCCAAAGAATCC	23H-RNA	F55A4.9, rncs-1		0	0	0.215091	0.358275	0	0	0	0		0	0	0.19354	0	0	0	0	0
ATGCTCGTCGATCCAGTTTGGCC	23H-RNA	F55A4.9, rncs-1		0	0	0	0	0	0	0	0		0	0	0	0	4.77791	0	0	0
ATGGATAGCTCAGTGGATAGT	23H-RNA	irld-17, Y46H3D.4		0	0	0	0	0	0	0	0		0	0	0	0	0	0	0	0
ATGGCAGCCGATGTGAATGAAGA	23H-RNA	T05E12.8		0	0	0	0	0	7.23544	0	0.212223		0	0	0	0	0	0	0	0.180209
ATGGCTGCGGCGAGGATGATG	23H-RNA	Y57G11C.1145_hairpin		0	0	0	0	0	0	0	0.212223		0	0	0	0	0	0	0	0
ATGGCTGCGGCGAGGATGATGT	23H-RNA	Y57G11C.1145_hairpin		0	0	0	0.179138	0	7.23544	0.379373	0.424445		0	0	0	0.162393	0	0	0	0.180209
ATGGCTGCGGCGAGGATGATGTG	23H-RNA	Y57G11C.1145_hairpin		0	9.19093	0.430181	0.71655	18.5917	21.7063	1.32781	0.636668		0	0	0.19354	0.162393	0	0	1.78254	0.360417
ATGTATTAAACGGTAAGGGCC	23H-RNA	mir-5592		0	0	1.72073	1.07483	0	0	1.32781	1.27334		3.85773	20.81	0.77416	0.64957	23.8895	5.18806	0.668454	0.540626
ATGTATTAAACGGTAAGGGCCG	23H-RNA	mir-5592		0	4.59547	0	0.895688	0	0	0.189687	0.212223		3.85773	0	0.38708	0.974355	14.3337	5.18806	0	1.44167
ATGTATTAAACGGTAAGGGCCGG	23H-RNA	mir-5592		0	0	0.430181	1.07483	0	7.23544	0.379373	0.212223		0	0	2.12894	1.29914	4.77791	0	0.891272	0.540626
ATGTATTAAACGGTAAGGGCCGGC	23H-RNA	mir-5592		0	0	0.215091	0	0	0	0	0		0	0	0	0	0	0	0	0
ATGTGGATGATGGCGTGGAAGA	23H-RNA	Y57G11C.1145_hairpin		0	0	0	0	0	0	0	0		0	0	0.19354	0	0	0	0	0
ATGTGGATGATGGCGTGGAAGAA	23H-RNA	Y57G11C.1145_hairpin		0	0	0	0	0	0	0	0		0	0	0	0	0	0	0	0
ATGTTTCTGAGATGTCTTCAC	23H-RNA	F43E2.6		0	0	0	0.179138	0	0	0	0		0	0	0	0	0	0	0	0
ATGTTTCTGAGATGTCTTCACA	23H-RNA	F43E2.6		0	0	0.215091	0	0	0	0	0.212223		0	0	0	0	0	0	0.222818	0
ATGTTTCTGAGATGTCTTCACAA	23H-RNA	F43E2.6		0	0	0	0	0	0	0	0		0	0	0	0	0	0	0	0
ATTAGATACCGTACCCCGAAAAC	23H-RNA	ChrIII_hairpin2		0	0	0	0	4.64794	0	0	0		0	0	0	0	0	0	0	0
ATTAGATACCGTACCCCGAAAACT	23H-RNA	ChrIII_hairpin2		0	0	0	0	0	0	0	0		0	0	0	0	0	0	0.222818	0
ATTCCACTTGGGGTAAATTCGCC	23H-RNA	C36A4.14		0	0	0	0.179138	4.64794	0	0	0		0	0	0	0	0	0	0.222818	0
ATTCGGGAATTAGTTGTCGAC	23H-RNA	T05E12.8		0	4.59547	0.645272	0	0	0	0.189687	0.212223		0	0	0.38708	0.64957	14.3337	0	0.445636	0
ATTCTCTCGTAGAACGTGTCGC	23H-RNA	F55A4.9, rncs-1		0	0	0	0	0	0	0	0		0	0	0	0	0	0	0.222818	0.360417
ATTCTCTCGTAGAACGTGTCGCT	23H-RNA	F55A4.9, rncs-1		0	0	0.430181	0	9.29587	14.4709	0.189687	0		0	0	0.58062	0	0	0	0	0.360417
ATTCTCTCGTAGAACGTGTCGCTT	23H-RNA	F55A4.9, rncs-1		0	0	0	0	4.64794	14.4709	0	0.212223		0	0	0	0.162393	0	0	0	0.180209
ATTGAGACCAGTGATAGCGACC	23H-RNA	F19G12.2, F58F9.1		0	0	0	0	0	0	0	0		0	0	0	0	0	0	0	0
ATTGCCAGTCGAGTCAGAAAATC	23H-RNA	Y116F11A.1		0	0	0	0	0	0	0	0.212223		0	0	0	0	0	0	0	0
ATTGGCCTACCGAACGAAAAACC	23H-RNA	Y116F11A.1		0	0	0	0	0	0	0	0		0	0	0	0	0	0	0	0
ATTGTCGGCCGCCGTGGAAAAC	23H-RNA	other		0	0	0.215091	0	0	0	0	0		0	0	0	0	0	0	0	0
ATTGTGAAGACATCTCAGAAA	23H-RNA	F43E2.6		0	4.59547	1.29054	1.07483	27.8876	14.4709	1.32781	0.424445		7.71546	20.81	0.58062	0.811963	9.55582	15.5642	1.33691	0.901043
ATTGTGAAGACATCTCAGAAACA	23H-RNA	F43E2.6		0	9.19093	0.645272	1.79138	55.7752	28.9417	1.32781	1.27334		3.85773	5.20251	0.38708	0.487178	23.8895	10.3761	0.891272	0.901043
ATTTAAAGCCGATAGGTAACC	23H-RNA	PALTTAA3		0	0	0	0	0	0	0	0		0	0	0	0	0	0	0	0
ATTTGCCGATGTTTCTGAGAT	23H-RNA	F43E2.6		0	0	0.645272	0.358275	0	0	0.379373	0.212223		0	0	0.58062	0.64957	0	0	0	0.180209
ATTTTGGGGGGCAGAAATCGGAA	23H-RNA	PAL8C		0	0	0	0	0	0	0	0		0	0	0	0	0	0	0	0
CAAAAATCGCCCGAAAATTCAC	23H-RNA	pde-2, R08D7.6		0	0	0	0	0	0	0	0		0	0	0	0	0	0	0	0
CAAAACTGCTGTTTCCCCTGTG	23H-RNA	Y59H11AR.6		0	0	0	0	0	0	0	0		0	0	0	0	0	0	0.445636	0
CAAAATACCAGATTGTCCTTCA	23H-RNA	F39E9.29_region		0	0	0	0	0	0	0.189687	0		0	0	0	0.324785	0	0	0	0
CAAAATTGGCGGAGCGATCGTTC	23H-RNA	other		0	0	0	0	0	0	0	0.212223		0	0	0	0	0	0	0	0
CAAAATTTCCGCCCCATGCTTAC	23H-RNA	Y37E3.30		0	0	0	0	0	0	0	0		0	0	0	0	0	0	0	0
CAAACTGGATTGACGAGCATCGAG	23H-RNA	F55A4.9, rncs-1		0	0	0	0	0	0	0.189687	0		0	0	0	0	0	0	0	0
CAAATCGTCTCTTCCGCGCGCC	23H-RNA	Unknown_RE2		0	0	0	0	0	0	0	0		0	0	0	0	0	0	0	0
CAACCCTGAACCAGACGTACCA	23H-RNA	F31C3.11, rrn-2.1		0	0	0	0	0	0	0	0.212223		0	0	0	0	0	0	0	0
CAACCGGACCCTGCCTCTTCATC	23H-RNA	Y57G11C.1145_hairpin		0	0	0	0	0	0	0	0		0	0	0	0	0	0	0	0
CAACGTCTCGGCTAGCCACCT	23H-RNA	T05E12.8		0	0	0	1.25396	4.64794	7.23544	0.379373	0.636668		0	0	0.38708	0.162393	0	0	0	0
CAACGTCTCGGCTAGCCACCTA	23H-RNA	T05E12.8		0	0	0	0	0	0	0	0.424445		7.71546	10.405	0.19354	0.162393	0	0	0	0
CAAGAGGAAGAGAAACAAAAGG	23H-RNA	F19B2.5		0	0	0	0	0	0	0	0		0	0	0	0	0	0	0	0
CAAGAGGAAGAGAAACAAAAGGA	23H-RNA	F19B2.5		0	0	0	0	0	0	0	0		0	0	0	0	0	0	0	0
CAAGTTCAACAGGTAGATCAAA	23H-RNA	TIR54TA1		0	0	0	0	0	0	0	0		0	0	0	0	0	0	0	0
CAAGTTCAACAGGTAGATCAAAA	23H-RNA	TIR54TA1		0	0	0	0	0	0	0	0		0	0	0	0	0	0	0	0
CAATAAAAACAATGGACAACTG	23H-RNA	Y59H11AR.6		0	0	0	0	0	0	0	0		0	0	0	0.324785	0	0	0	0
CAATAAAAACAATGGACAACTGC	23H-RNA	Y59H11AR.6		0	0	0	0	0	0	0	0		0	0	0	0	0	0	0	0
CAATCAAAGGATAGTCTCAACA	23H-RNA	F31C3.10, F31C3.9, rrn-3.1, rrn-3.56		0	0	0	0	0	0	0.189687	0		0	0	0	0	0	0	0	0
CAATGAAAACAACACTTTTGGT	23H-RNA	F23B2.9		0	0	0	0	0	0	0	0		0	0	0	0	0	0	0	0
CAATGGAGCGGTGTAAACTTTT	23H-RNA	E01G4.7		0	0	0.860363	0	9.29587	0	0	0		0	0	0.19354	0	0	0	0.222818	0
CAATGGAGCGGTGTAAACTTTTC	23H-RNA	E01G4.7		0	0	1.07545	0.179138	4.64794	0	1.32781	0.636668		0	0	0.58062	0.487178	0	0	0.222818	0.360417
CAATGTATGGAGGACGAACACA	23H-RNA	C36A4.14		0	0	0	0	0	0	0	0		0	0	0	0	0	0	0	0
CAATGTGCTCCAGTCCGCTTGGC	23H-RNA	F55A4.9, rncs-1		0	0	0	0	0	0	0	0		0	0	0	0	0	0	0.222818	0
CACATCATCCTCGCCGCAGCCAT	23H-RNA	Y57G11C.1145_hairpin		0	0	0	0	0	0	0	0		0	0	0	0	0	0	0	0
CACCGTCCTGCTGTCAATATCA	23H-RNA	F31C3.9, rrn-3.1		0	0	0	0	0	0	0	0		0	0	0	0	0	0	0	0
CACGCCATCATCCACATCATCCT	23H-RNA	Y57G11C.1145_hairpin		0	0	0	0	0	0	0	0		0	0	0	0	0	0	0	0
CACGGAGTTAAATTTGAATTTT	23H-RNA	Y69A2AR.16_hairpin		0	0	0.215091	0	0	0	0	0		0	5.20251	0	0.162393	0	0	0	0
CACGGAGTTAAATTTGAATTTTT	23H-RNA	Y69A2AR.16_hairpin		0	0	0.215091	0.179138	18.5917	0	0	0		11.5732	0	0.19354	0	4.77791	41.5045	0.222818	0.901043
CACGGCAACTCGGTCCAAAACC	23H-RNA	PALNN1		0	0	0	0	4.64794	0	0	0		3.85773	0	0	0	0	0	0.222818	0
CACGGTGCCAGATCCTGAAAACG	23H-RNA	other		0	0	0	0	0	0	0	0		0	0	0	0	0	0	0	0
CACTTACCAGCACACAGAGACG	23H-RNA	Y57G11C.51		0	0	0	0	9.29587	0	0.379373	0.212223		0	0	0	0	0	0	0.445636	0
CACTTACCAGCACACAGAGACGC	23H-RNA	Y57G11C.51		0	0	0	0	4.64794	0	0	0		0	0	0	0	0	0	0	0
CAGACATGATCTGGAGATGTTT	23H-RNA	Y116A8B.1		0	0	0	0.179138	0	7.23544	0.379373	0		0	0	0.19354	0	0	0	0	0
CAGCACGACGTAGACGGAAAGGA	23H-RNA	H15N14.4		0	0	0	0	0	0	0	0		0	0	0	0	0	0	0	0
CAGCCATCGTCGTCGTCATCCAC	23H-RNA	Y57G11C.1145_hairpin		0	0	0	0	0	0	0	0		0	0	0.19354	0	0	0	0	0
CAGCCGGCCCTTACCGTTTAATA	23H-RNA	mir-5592		0	4.59547	0	0	32.5356	36.1772	0.379373	0		0	0	0	0	14.3337	15.5642	0	0.360417
CAGCGAATCGCTCTGCCCACTT	23H-RNA	Y116A8C.27		0	0	0	0	0	0	0	0		0	0	0	0	0	0	0.222818	0
CAGCGAATCGCTCTGCCCACTTT	23H-RNA	Y116A8C.27		0	9.19093	0	0	0	0	0	0		0	10.405	0	0	0	0	0	0
CAGCGTGAACTGTCGAGAGTGC	23H-RNA	linc-68, Y49F6A.10		0	0	0	0	0	0	0	0		0	0	0	0	0	0	0	0
CAGTGGAGTGGATGACGACGACG	23H-RNA	Y57G11C.1145_hairpin		0	0	0	0	0	0	0	0		0	0	0	0	0	0	0	0
CAGTGGAGTGGATGACGACGACGA	23H-RNA	Y57G11C.1145_hairpin		0	0	0	0	0	7.23544	0	0.212223		0	0	0	0	0	0	0	0
CATAACGAGACCGCTGAAAAAGT	23H-RNA	PAL5A		0	0	0	0	0	0	0	0		0	0	0	0	0	0	0	0.180209
CATAGGAAATAGATCTAGAACTT	23H-RNA	F58A6.9		0	0	0	0	0	0	0.379373	0		0	0	0	0	0	0	0	0
CATATCCCATGAATTGTCCGCA	23H-RNA	linc-17, Y49F6A.9		0	0	0	0	0	0	0	0		0	0	0	0	0	0	0	0
CATCAGCACCAACACCTCACCC	23H-RNA	C36A4.14		0	0	0	0	0	0	0	0		0	0	0	0	0	0	0	0
CATCATCCTCGCCGCAGCCAT	23H-RNA	Y57G11C.1145_hairpin		0	0	0	0	0	0	0	0		0	0	0	0	0	0	0	0
CATCATCCTCGCCGCAGCCATC	23H-RNA	Y57G11C.1145_hairpin		0	0	0	0	0	0	0	0		0	0	0	0	0	0	0	0
CATCATCCTCGCCGCAGCCATCG	23H-RNA	Y57G11C.1145_hairpin		0	0	0	0	4.64794	43.4126	0.379373	0		0	0	0	0	0	0	0	0.180209
CATCATCCTCGCCGCAGCCATCGT	23H-RNA	Y57G11C.1145_hairpin		0	0	0	0	0	0	0	0		0	0	0.19354	0	0	0	0	0
CATCCCGATCGTTCGTCGTCGC	23H-RNA	ChrX_intergenic1		0	9.19093	0	0	23.2397	0	0.189687	0		0	0	0	0	0	0	0.222818	0
CATCGTAAGGCACCCGACACACT	23H-RNA	Y41C4A.17		0	0	0	0	0	0	0	0		0	0	0	0	0	0	0	0
CATCGTCCGATTGGTGAAACCA	23H-RNA	Y17D7C.3		0	0	0	0	0	0	0	0		0	0	0	0	0	0	0	0
CATCGTCGTCGTCATCCACTCC	23H-RNA	Y57G11C.1145_hairpin		0	0	0.430181	0.537413	0	7.23544	0.189687	0		0	0	0	0	0	0	0.222818	0
CATCGTCGTCGTCATCCACTCCA	23H-RNA	Y57G11C.1145_hairpin		0	0	0	0	0	0	0.189687	0		0	0	0	0.162393	0	0	0	0
CATCTCAGAAACATCGGCAAATGG	23H-RNA	F43E2.6		0	0	0.645272	0.179138	18.5917	21.7063	0.189687	0.84889		3.85773	0	0.19354	0	4.77791	10.3761	0.222818	1.08125
CATGACGGTTTGATCTACAAA	23H-RNA	CELE14B		0	0	0	0	0	0	0	0		0	0	0	0	0	0	0	0
CATGAGATGTCGGCGGCCTGAT	23H-RNA	PALTA3		0	0	0	0	0	0	0	0		0	0	0	0	0	0	0	0
CATGAGATGTCGGCGGCCTGATA	23H-RNA	PALTA3		0	0	0	0	0	0	0	0		0	0	0	0	0	0	0	0
CATGTATTAAACGGTAAGGGC	23H-RNA	mir-5592		0	0	4.732	4.12016	0	0	0.379373	0.212223		0	0	3.67726	4.54699	0	0	0.445636	0.540626
CATGTATTAAACGGTAAGGGCC	23H-RNA	mir-5592		0	0	10.7545	6.80723	0	0	2.27624	1.69778		0	5.20251	7.7416	8.11963	0	0	2.00536	1.62188
CATGTATTAAACGGTAAGGGCCG	23H-RNA	mir-5592		0	0	4.30181	2.50793	0	0	1.32781	0.84889		15.4309	0	3.29018	1.62393	4.77791	0	1.11409	0.901043
CATGTATTAAACGGTAAGGGCCGG	23H-RNA	mir-5592		0	0	0	0.179138	0	0	0	0		0	0	0	0	0	0	0	0.360417
CATTCCTACGACATGGAGGTCCC	23H-RNA	C40A11.10, mir-8199		0	4.59547	0.215091	0	4.64794	0	0	0.212223		0	0	0.19354	0.487178	0	0	0	0.180209
CATTCCTACGACATGGAGGTCCCT	23H-RNA	C40A11.10, mir-8199		0	0	0.215091	0	0	0	0.189687	0		3.85773	0	0	0	0	10.3761	0	0
CATTTCTACAAGTCTCATGTTGA	23H-RNA	M01E5.3		0	0	0	0	0	0	0	0		0	0	0	0	0	0	0	0
CATTTGCCGATGTTTCTGAGA	23H-RNA	F43E2.6		0	0	0.215091	0	0	0	0.56906	0		0	0	0.19354	0	0	0	0	0
CCAAACTGGATTGACGAGCAT	23H-RNA	F55A4.9, rncs-1		0	0	0	0	0	0	0	0		0	0	0	0	0	0	0.222818	0
CCAAACTGGATTGACGAGCATC	23H-RNA	F55A4.9, rncs-1		0	0	0	0	4.64794	0	0	0.212223		0	0	0	0	0	0	0	0
CCAAACTGGATTGACGAGCATCG	23H-RNA	F55A4.9, rncs-1		0	0	0	0.358275	0	0	0.379373	0		0	0	0	0	0	0	0	0
CCAAAGGATCACGAGGCTCTTC	23H-RNA	Unknown_IR1		0	0	0	0.179138	0	0	0	0		0	0	0	0	0	0	0	0
CCAAAGGATCACGAGGCTCTTCC	23H-RNA	Unknown_IR1		0	0	0	0	0	0	0	0		0	0	0	0	0	0	0	0
CCAAGCGGACTGGAGCACATTGG	23H-RNA	F55A4.9, rncs-1		0	0	0	0.358275	0	0	0.189687	0.84889		0	0	0	0	0	0	0	0.540626
CCAAGCGGACTGGAGCACATTGGA	23H-RNA	F55A4.9, rncs-1		0	0	0	0	0	0	0	0		0	0	0	0	0	0	0	0
CCACCGTGTCTGGTCTCCTCGC	23H-RNA	ZK402.3		0	0	0	0.179138	4.64794	0	0	0		0	0	0	0	0	0	0	0
CCACCGTGTCTGGTCTCCTCGCC	23H-RNA	ZK402.3		0	0	0	0	0	0	0.189687	0		0	0	0	0	0	0	0	0
CCACGCCATCATCCACATCATCC	23H-RNA	Y57G11C.1145_hairpin		0	0	0	0	0	0	0	0		0	0	0	0	0	0	0	0
CCACGGCGGCCGACAATTTCCG	23H-RNA	Unknown_hairpin_RE2		0	0	0	0	0	0	0	0		0	0	0	0	0	0	0	0
CCACGGCGGCCGACAATTTCCGA	23H-RNA	Unknown_hairpin_RE2		0	0	0	0	0	0	0.189687	0		0	0	0	0	0	0	0	0
CCAGATCCGGAAAACGTAGATCC	23H-RNA	other		0	0	0	0	0	0	0	0		0	0	0	0	0	0	0	0
CCATCAGCACCAACACCTCACC	23H-RNA	C36A4.14		0	0	0.215091	0.179138	0	0	0	0		0	0	0	0	0	0	0	0
CCATCAGCACCAACACCTCACCC	23H-RNA	C36A4.14		0	0	0.215091	0	4.64794	7.23544	0	0		0	0	0	0	0	0	0	0
CCATCGGACGAGCTCTTATCCCC	23H-RNA	T05E12.8		0	0	0	0.179138	0	0	0	0		0	0	0.19354	0	0	0	0	0
CCATCGGACGAGCTCTTATCCCCT	23H-RNA	T05E12.8		0	0	0	0.179138	0	0	0	0		0	0	0	0	0	0	0	0
CCATCGTCGTCGTCATCCACTCC	23H-RNA	Y57G11C.1145_hairpin		0	0	0	0	0	0	0	0		0	0	0	0	0	0	0.222818	0
CCATTTGCCGATGTTTCTGAGA	23H-RNA	F43E2.6		0	4.59547	0	0	4.64794	0	0.189687	0		0	0	0	0	0	0	0	0.360417
CCCCATTGCCGAATGTTTGAAT	23H-RNA	Y37E3.30		0	0	0	0.179138	13.9438	0	0	0		3.85773	0	0.19354	0	0	0	0	0.180209
CCCCGAACGCAGATTTATTTTT	23H-RNA	T04D3.t1		0	0	0	0	0	0	0	0		0	0	0	0	0	0	0	0
CCCCGTGAGGACCGTGTACGCCC	23H-RNA	Y116A8B.1		0	0	0	0	0	0	0.189687	0		0	0	0	0	0	0	0	0
CCCGCATTTTTTGTAGATCAGA	23H-RNA	CELE14B		0	0	0	0	0	0	0	0		0	0	0	0	0	0	0	0
CCCGCCCACAGAACTGTGCCTTG	23H-RNA	H15N14.4, H37A05.4, Y24F12A.3, Y24F12A.4		0	0	0	0	0	0	0	0		0	0	0	0	0	0	0	0
CCCGCCCACAGTTCTGTACCTTG	23H-RNA	Y24F12A.3, Y24F12A.4		0	0	0	0	0	0	0	0		0	0	0	0	0	0	0	0
CCCGCCCACGATTTCATTTGC	23H-RNA	mir-5550_RE		0	0	0	0	0	0	0	0		0	0	0	0	0	0	0	0
CCCGCGGGTGATGACAGAAAC	23H-RNA	dnj-27_element		0	0	0.215091	0	0	0	0	0		0	0	0	0	0	0	0	0
CCCGCGGGTGATGACAGAAACGG	23H-RNA	dnj-27_element		0	0	0	0	0	0	0	0		0	0	0	0.162393	0	0	0	0.180209
CCCGTCTAGGTGATCTTTCAACA	23H-RNA	Y37E3.30		0	0	0	0	0	0	0	0		0	0	0	0	0	0	0	0
CCCTACTCTTCGCATCTCATC	23H-RNA	Y67D8A.2		0	9.19093	0	0.179138	9.29587	7.23544	0	0		3.85773	0	0	0.487178	0	0	0	0
CCCTTACCGTTTAATACATGTT	23H-RNA	mir-5592		0	0	0	0	0	0	0	0		0	0	0	0	0	0	0	0
CCCTTACGATCCTTCTTATCTGA	23H-RNA	Unknown_IR1		0	0	0	0	0	0	0	0		0	0	0	0	0	0	0	0
CCGATGTTTCTGAGATGTCTT	23H-RNA	F43E2.6		0	0	0	0	0	0	0	0		0	0	0	0	0	0	0.668454	0.180209
CCGATTATTCTGGAACAAGTAT	23H-RNA	MTCE.7		0	0	0	0	0	0	0	0		0	0	0	0	0	0	0	0
CCGATTTCTGCCCCCCCAAAAT	23H-RNA	PAL8C		0	0	0	0	0	0	0	0		0	0	0	0	0	0	0	0
CCGATTTCTGCCCCCCCAAAATGT	23H-RNA	PAL8C		0	0	0.860363	0.179138	0	0	0	0		0	0	0	0	0	0	0	0
CCGCATTTTTTGTAGATCAAA	23H-RNA	CELE14B		0	0	0	0.71655	9.29587	0	0.56906	0.636668		0	0	0	0.162393	0	0	0.445636	0
CCGCATTTTTTGTAGATCAAACC	23H-RNA	CELE14B		0	0	0	0.179138	0	0	0	0		0	0	0	0	0	0	0	0
CCGCATTTTTTGTAGATCAAAGC	23H-RNA	CELE14B		0	0	0	0	0	0	0	0		0	0	0	0	0	0	0	0
CCGCCCACAGAACTGTACCTTGC	23H-RNA	H15N14.4, H37A05.4		0	0	0	0.179138	0	7.23544	0	0		0	0	0	0	0	0	0	0
CCGCCCACAGTTCTGTACCTTG	23H-RNA	Y24F12A.3, Y24F12A.4		0	0	0	0	0	0	0	0		0	0	0	0	0	0	0	0
CCGCCCACAGTTCTGTACCTTGC	23H-RNA	Y24F12A.3, Y24F12A.4		0	0	0	0	0	0	0	0		0	0	0	0	0	0	0	0
CCGCGCGCCGCTATGTTTAACTC	23H-RNA	PALTA3		0	0	0	0	0	0	0	0		0	0	0	0	0	0	0	0
CCGCGCGCCGCTATGTTTAACTT	23H-RNA	PALTA3		0	0	0.215091	0	9.29587	0	0	0		0	5.20251	0	0	0	5.18806	0	0
CCGGATGTCTGTCACTCTCTAAC	23H-RNA	Unknown_RE2		0	0	0	0	0	0	0	0		0	0	0	0	0	0	0	0
CCGGTCGATGCAATTCTTTTT	23H-RNA	other		0	0	0.430181	0.358275	0	0	0.379373	0		0	0	0	0	0	5.18806	0	0
CCGTCTAGGTGATCTTTCAACA	23H-RNA	Y37E3.30		0	0	0.430181	0.179138	13.9438	36.1772	0.189687	0.424445		0	0	0.19354	0.162393	0	0	0.222818	0.360417
CCGTCTAGGTGATCTTTCAACAC	23H-RNA	Y37E3.30		0	0	0	0.179138	0	0	0.948434	0		0	0	0.38708	0	4.77791	0	0	0.180209
CCGTGAGTGGACGAGAAAAAGG	23H-RNA	PALTA3		0	0	0	0	0	0	0	0		0	0	0	0	0	0	0	0
CCTCAATGTGTGCCTGCTTCT	23H-RNA	Y37E11B.2		0	4.59547	0.215091	0.358275	0	7.23544	0	0		0	0	0	0	0	0	0	0
CCTCATACCGCGTATCTATTC	23H-RNA	F47E1.18, linc-22		0	0	0	0	0	0	0	0		0	0	0	0	0	0	0	0
CCTCATACCGCGTATCTATTCA	23H-RNA	F47E1.18, linc-22		0	0	0	0	0	0	0	0		0	0	0	0	0	0	0	0
CCTCCCGATAGAATGAATTTTC	23H-RNA	Y57G11C.1144		0	0	0	0	0	0	0	0		0	0	0	0	0	0	0	0
CCTCGAGAGCGCGACAAAAACT	23H-RNA	W03D2.15		0	0	0	0	0	0	0	0		0	0	0	0	0	0	0	0
CCTTACGATCCTTCTTATCTGA	23H-RNA	Unknown_IR1		0	0	0	0	0	0	0	0		0	0	0	0	0	0	0	0
CCTTCGACATCTCTGATAACAA	23H-RNA	F58A4.3, hcp-3		0	0	0	0	0	0	0	0		0	0	0	0	0	0	0	0
CCTTGATTCTCAAAGTGCAGACC	23H-RNA	W03D2.15		0	0	0	0	0	0	0.189687	0		0	0	0	0	0	0	0	0
CGAAGAGCCGAGAAGAGAGATCA	23H-RNA	ChrIII_hairpin1		0	0	0	0	0	0	0	0		0	0	0	0	0	0	0	0
CGACACGTTCTACGAGGGAATT	23H-RNA	F55A4.9, rncs-1		0	0	0	0	0	0	0	0		0	0	0	0	0	5.18806	0.222818	0
CGACCGGACGCCGATTTGTACAG	23H-RNA	Unknown_hairpin_RE2		0	0	0	0	0	0	0	0		0	0	0	0	0	0	0	0
CGACGACGAACGATCGGGATG	23H-RNA	ChrX_intergenic1		0	0	0	0	0	21.7063	0.189687	0		0	0	0.38708	0	0	0	0	0
CGACGACGAACGATCGGGATGGA	23H-RNA	ChrX_intergenic1		0	0	0.215091	0	0	0	0	0		0	0	0.19354	0	0	0	0	0
CGACGACGATGGCTGCGGCGAG	23H-RNA	Y57G11C.1145_hairpin		0	0	0	0	4.64794	0	0	0		0	0	0	0	0	0	0	0.180209
CGACGACGATGGCTGCGGCGAGG	23H-RNA	Y57G11C.1145_hairpin		0	0	1.07545	0.358275	0	7.23544	0.189687	0		3.85773	0	0.77416	0.324785	0	0	0	0
CGACGACGATGGCTGCGGCGAGGA	23H-RNA	Y57G11C.1145_hairpin		0	0	0.215091	0	0	0	0	0		0	0	0.38708	0.324785	0	0	0	0
CGACGATGGCTGCGGCGAGGATG	23H-RNA	Y57G11C.1145_hairpin		0	0	0.215091	0	4.64794	14.4709	0	0		0	0	0	0	0	0	0	0.180209
CGACGATGGCTGCGGCGAGGATGA	23H-RNA	Y57G11C.1145_hairpin		0	0	0	0	0	0	0	0		0	0	0	0	0	0	0	0
CGACGGATCAGTGTTGCCACT	23H-RNA	T05E12.8		0	0	0.215091	0	0	0	0	0		0	0	0.19354	0	0	0	0	0.180209
CGACGTGTTCCAGCATTCTTCGAC	23H-RNA	Y37E3.30		0	0	0	0	0	0	0	0		0	0	0.38708	0	0	0	0	0.180209
CGAGGATGATGTGGATGATGG	23H-RNA	Y57G11C.1145_hairpin		0	0	0.215091	0	0	0	0	0		0	0	0	0	0	0	0	0
CGAGGATGATGTGGATGATGGCG	23H-RNA	Y57G11C.1145_hairpin		0	0	0	0	0	0	0	0		0	0	0	0	0	0	0	0
CGATGCTCGTCGATCCAGTTT	23H-RNA	F55A4.9, rncs-1		0	0	0.215091	0	0	0	0	0		0	0	0	0	0	0	0	0
CGATGCTCGTCGATCCAGTTTGG	23H-RNA	F55A4.9, rncs-1		0	0	0	0	0	0	0	0		0	0	0	0.162393	0	0	0	0
CGATGCTCGTCGATCCAGTTTGGC	23H-RNA	F55A4.9, rncs-1		0	0	0	0	0	0	0	0		0	0	0	0	0	0	0	0
CGATGGATTCTTTGGAGCAAC	23H-RNA	F55A4.9, rncs-1		0	0	0	0	0	0	0	0		0	0	0	0	0	0	0	0
CGATGGATTCTTTGGAGCAACCG	23H-RNA	F55A4.9, rncs-1		0	0	0	0	0	0	0.189687	0		0	0	0	0	0	0	0	0.180209
CGATGGCTGCGGCGAGGATGA	23H-RNA	Y57G11C.1145_hairpin		0	0	0	0.179138	0	0	0.189687	0		0	0	0	0	0	0	0.222818	0
CGATGGCTGCGGCGAGGATGATGT	23H-RNA	Y57G11C.1145_hairpin		0	0	0	0	0	21.7063	0	0		0	0	0	0	0	0	0	0
CGATGTTTCTGAGATGTCTTCA	23H-RNA	F43E2.6		0	0	0	0.179138	4.64794	14.4709	0.189687	0		0	0	0	0.324785	0	0	0.222818	1.08125
CGATGTTTCTGAGATGTCTTCAC	23H-RNA	F43E2.6		0	0	0.860363	0.71655	13.9438	0	1.51749	0.84889		0	0	0.19354	0.324785	0	0	0	0.180209
CGATGTTTCTGAGATGTCTTCACA	23H-RNA	F43E2.6		0	0	0.215091	0	0	0	0	0		0	0	0	0	0	0	0	0
CGCATTTTTCGTAGATCAAACCG	23H-RNA	CELE14B		0	0	0	0	0	0	0	0		0	0	0	0	0	0	0	0
CGCATTTTTTGTAGATCAAACC	23H-RNA	CELE14B		0	0	0	0	4.64794	0	0	0		0	0	0	0	0	0	0	0
CGCATTTTTTGTAGATCAAACCC	23H-RNA	CELE14B		0	0	0	0	0	0	0.379373	0		0	0	0	0	0	0	0	0
CGCATTTTTTGTAGATCAAACCG	23H-RNA	CELE14B		0	0	0	0	0	0	0	0		0	0	0	0	0	0	0	0
CGCATTTTTTGTAGATCAACGT	23H-RNA	CELE14B		0	0	0	0	0	0	0	0		0	0	0	0	0	0	0	0
CGCCACGAGCGGTGGAGCCTGCA	23H-RNA	T05E12.8		0	0	0	0	0	0	0	0		0	0	0	0	0	0	0	0
CGCGCCGCTATGTTTAACTCGC	23H-RNA	PALTA3		0	0	0	0	0	0	0	0		0	0	0.19354	0	0	0	0	0
CGCGCCGCTATGTTTAACTCGCA	23H-RNA	PALTA3		0	0	0	0	0	0	0	0		0	0	0	0	0	0	0	0
CGCGCGCCGCTATGTTTAACTCG	23H-RNA	PALTA3		0	0	0	0	0	0	0	0		0	0	0.19354	0.162393	0	0	0	0
CGCGCGCCGCTATGTTTAACTT	23H-RNA	PALTA3		0	0	0	0.179138	0	0	0	0		0	0	0	0	0	5.18806	0	0.180209
CGCGCGGTTTGGTCCAGTCTCC	23H-RNA	E01G4.5		0	0	0	0	0	0	0	0.212223		0	0	0	0	0	0	0	0
CGCGGGTGATGACAGAAACGGG	23H-RNA	dnj-27_element		0	0	0	0	0	0	0	0		0	0	0	0	0	0	0	0
CGCGTAGGTCTAAATTATTTTG	23H-RNA	other		0	0	0	0	0	0	0	0		0	0	0	0	0	0	0	0
CGGAAACTGAAGCCCCAAAATC	23H-RNA	other		0	0	0	0	0	0	0	0		0	0	0.19354	0	0	0	0	0
CGGAAATTCGTTGATTGAGACA	23H-RNA	other		0	0	0	0	9.29587	0	0.189687	0.212223		0	0	0	0	0	0	0	0
CGGAATGGTTCAAAAATCGAGCC	23H-RNA	F52G3.8		0	0	0	0	0	0	0	0		0	0	0	0	0	0	0.222818	0
CGGACGGGAGCCAAGTTTGCACC	23H-RNA	other		0	0	0	0	0	0	0	0		0	0	0	0	0	0	0	0
CGGACTGGAGCACATTGGAAAAA	23H-RNA	F55A4.9, rncs-1		0	0	0	0	0	0	0	0		0	0	0	0	0	0	0	0
CGGAGAAATGACGAGAAATGC	23H-RNA	K07C5.13		0	0	0	0	0	0	0.189687	0		3.85773	0	0	0.162393	0	10.3761	0	0.180209
CGGAGCTCGGTTGTGTACGACC	23H-RNA	F49B2.3, Y116A8B.1		0	0	0	0	0	0	0	0		0	0	0	0.324785	0	0	0	0
CGGAGCTGAAGGATCAGAACATC	23H-RNA	Unknown_IR1		0	0	0	0	0	0	0	0		0	0	0	0	0	0	0	0
CGGAGTTAAATTTGAATTTTTT	23H-RNA	Y69A2AR.16_hairpin		0	0	0	0	0	0	0	0		0	0	0	0	0	0	0	0
CGGAGTTAAATTTGAATTTTTTA	23H-RNA	Y69A2AR.16_hairpin		0	0	0	0	0	0	0	0		0	0	0	0	0	0	0	0
CGGATAGTGTGATCTTAGAACCC	23H-RNA	Y116F11A.1		0	0	0	0.179138	0	0	0.189687	0.212223		0	0	0.19354	0	0	0	0	0
CGGATGTCTGTCACTCTCTAAC	23H-RNA	Unknown_RE2		0	0	0	0	0	0	0	0		0	0	0	0	0	0	0	0
CGGCCCTTACCGTTTAATACAT	23H-RNA	mir-5592		0	9.19093	0.645272	1.4331	13.9438	28.9417	2.27624	1.48556		0	5.20251	1.16124	2.92307	9.55582	5.18806	3.56509	3.60417
CGGCCCTTACCGTTTAATACATGT	23H-RNA	mir-5592		0	0	0.215091	0.358275	27.8876	7.23544	0.189687	0.424445		3.85773	5.20251	0	0	23.8895	0	0.891272	0.720835
CGGCGAGGATGATGTGGATGATG	23H-RNA	Y57G11C.1145_hairpin		0	0	0	0	0	0	0	0		0	0	0	0	0	0	0	0
CGGCGCGCGGAACCCATGAGATG	23H-RNA	PALTA3		0	0	0	0	0	0	0	0		0	0	0	0	0	0	0	0
CGGCGGCCGACAATTTCCGAGC	23H-RNA	Unknown_hairpin_RE2		0	0	0	0	0	0	0	0		0	0	0	0	0	0	0	0
CGGCGGCCGACAATTTCCGAGT	23H-RNA	Unknown_hairpin_RE2		0	0	0	0	0	0	0	0		0	0	0	0	0	0	0	0
CGGCGGCCGACGATTTCTGAGTT	23H-RNA	F23D12.11		0	0	0	0	0	0	0	0		0	0	0	0	0	0	0	0
CGGCTCTTCGAGCGCGTCTTCTT	23H-RNA	ChrIII_hairpin1		0	0	1.72073	0.895688	18.5917	0	0.948434	1.27334		0	0	0.9677	1.29914	0	0	0.222818	1.08125
CGGGAGGAAAGCTGGGATTATCC	23H-RNA	Y37E3.30		0	0	0	0.179138	9.29587	0	0	0		0	0	0.19354	0	0	0	0	0
CGGGATGATGGATCGGGATGA	23H-RNA	T05E12.10		0	0	0	0.179138	0	0	0	0		0	0	0	0.324785	0	0	0.445636	0
CGGGATGATGGATCGGGATGAA	23H-RNA	T05E12.10		0	0	0	0.358275	0	0	0	0		0	10.405	0	0	0	0	0	0.360417
CGTACACAACCGAGCTCCGCC	23H-RNA	F49B2.3, Y116A8B.1		0	0	0	0.179138	4.64794	0	0	0		0	0	0	0	0	0	0	0
CGTAGGATGTCGGCGGCCTGATA	23H-RNA	PALTA3		0	0	0	0	0	0	0	0		0	0	0	0	0	0	0	0
CGTATATTCTCTATTAGTGCTGC	23H-RNA	Unknown_RE6		0	0	0	0	0	0	0	0		0	0	0	0	0	0	0	0
CGTATATTCTCTATTAGTGCTGT	23H-RNA	other, ZK792.4		0	0	0	0	0	0	0.379373	0		0	0	0	0	0	0	0	0
CGTATTGCAAGCCACGGTTCTGT	23H-RNA	DNA-8-1		0	0	0	0	0	0	0	0		0	0	0	0	0	0	0	0
CGTCCTGCTGTCAATATCAACCA	23H-RNA	F31C3.9, rrn-3.1		0	0	0	0	0	0	0	0		0	0	0	0	0	0	0	0
CGTCGCGGCCGAGCTTCCCAAA	23H-RNA	Y71H2B.5		0	0	0	0	0	0	0	0		0	0	0	0	0	0	0	0
CGTCGTCGTCATCCACTCCACCG	23H-RNA	Y57G11C.1145_hairpin		0	4.59547	0	0	0	0	0	0		0	0	0	0	0	0	0	0
CGTCTGGTTCAGGGTTGTTTA	23H-RNA	F31C3.11, rrn-2.1		0	0	2.366	1.25396	4.64794	0	1.51749	1.06111		0	5.20251	0.9677	1.13675	0	5.18806	0.445636	0.720835
CGTGAGATGTCGGCGGCCTGATA	23H-RNA	PALTA3		0	0	0	0	0	0	0	0		0	0	0	0	0	0	0	0
CGTGGAAGAAGTTGATGAAGAGG	23H-RNA	Y57G11C.1145_hairpin		0	0	0	0	0	0	0	0		0	0	0	0	0	0	0	0
CGTGGCGTGTACTGCAGAAAACC	23H-RNA	PALTA3		0	0	0	0	0	0	0	0		0	0	0	0	0	0	0	0
CGTGTCGCATCTGTCCGAAGTTG	23H-RNA	other, tbc-9, Y45F10A.6		0	0	0	0	0	0	0	0		0	0	0	0	0	0	0	0
CGTGTCGCTTCGTCATCTGATG	23H-RNA	F55A4.9, rncs-1		0	0	0	0	0	0	0	0		0	0	0	0	0	0	0	0
CGTGTCGCTTCGTCATCTGATGC	23H-RNA	F55A4.9, rncs-1		0	0	0	0	0	0	0.189687	0		0	0	0.19354	0	0	0	0	0.180209
CGTTCTACGAGGGAATTGACT	23H-RNA	F55A4.9, rncs-1		0	0	0	0	0	0	0	0		0	0	0	0	0	0	0	0
CTAAATACTGGAGCAGCGCAACC	23H-RNA	F52G3.8		0	4.59547	0	0	9.29587	0	0.189687	0		0	0	0	0.324785	0	0	0	0
CTAAGACTGTTTCTGATCACAA	23H-RNA	F43E2.13, F43E2.6, linc-169		0	0	0	0	0	0	0.56906	0.212223		3.85773	0	0	0	0	0	0	0
CTACAACGTGGAGCTAAGACACCC	23H-RNA	F55C9.3		0	0	0	0	0	0	0	0.636668		0	0	0	0.324785	0	0	0	0
CTAGTCAATTCTCTCGTAGAACG	23H-RNA	F55A4.9, rncs-1		0	0	0.215091	0.179138	0	7.23544	0	0		0	0	0	0	0	0	0	0
CTATCAATACTCTATGTTTTTT	23H-RNA	C35D6.3		0	0	0	0	0	0	0	0		0	0	0.38708	0	0	0	0	0
CTATCTACACTCTCTGTACCGA	23H-RNA	other		0	0	0	0	0	0	0	0		0	0	0	0	0	0	0	0
CTATCTACACTCTCTGTACCGG	23H-RNA	Unknown_RE2		0	0	0	0	0	0	0	0		0	0	0.19354	0	0	0	0	0
CTATCTACACTCTCTGTACCGT	23H-RNA	other		0	0	0	0	0	0	0	0		0	0	0	0	0	0	0	0
CTATTTTGATAAGTCACTGACAC	23H-RNA	F39E9.29_region		0	0	0.645272	0	0	0	0	0		0	0	0	0	0	0	0.222818	0
CTCAAAATAATAAAACTGCGT	23H-RNA	PALTA3		0	0	0	0	0	0	0	0		0	0	0	0	0	0	0	0
CTCAAAATAATAAAACTGCGTGG	23H-RNA	PALTA3		0	0	0	0	0	0	0	0		0	0	0	0.162393	0	0	0	0
CTCAAAATCCTGAGCCTCACTCA	23H-RNA	M4.2, puf-4		0	0	0	0	0	0	0	0		0	0	0	0	0	0	0	0
CTCAACAGATCGCAGTATAAAA	23H-RNA	F31C3.10, F31C3.9, rrn-3.1, rrn-3.56		0	0	0	0	0	0	0	0		0	0	0	0	0	0	0	0.180209
CTCAGGATTTTGAGTGAGGCTCA	23H-RNA	M4.2, puf-4		0	0	0	0	0	0	0	0		0	0	0	0	0	0	0	0
CTCATCTCTGATCTTTTCCAATT	23H-RNA	F55A4.9, rncs-1		0	0	0	0	4.64794	0	0	0.212223		0	0	0	0	0	0	0	0
CTCCAGGTCCATCTACAAACAAC	23H-RNA	K02E2.11		0	0	0	0	0	0	0	0		0	0	0	0	0	0	0	0
CTCCAGTCCGCTTGGCCAAACT	23H-RNA	F55A4.9, rncs-1		0	0	0	0	0	0	0	0		0	0	0	0	0	0	0	0
CTCCATACGGTCATTTGAGTCTC	23H-RNA	F34D6.11, linc-12		0	0	0.645272	0.537413	0	0	0	0.212223		0	0	0.38708	0	4.77791	0	0	0
CTCCTCGGTCTTGACGAAATCC	23H-RNA	C36A4.14		0	0	0	0.358275	23.2397	14.4709	0.189687	0		0	0	0.77416	0.162393	0	0	0	0
CTCCTCGGTCTTGACGAAATCCC	23H-RNA	C36A4.14		0	0	0	0.537413	0	7.23544	0.379373	0		0	0	0.38708	0.162393	0	0	0	0
CTCCTCGGTCTTGACGAAATCCCA	23H-RNA	C36A4.14		0	0	0	0	0	0	0	0		0	0	0	0	0	0	0	0
CTCGAACTCGCGACCTCTAGATC	23H-RNA	irld-17, Y46H3D.4		0	0	0	0	0	0	0	0		0	0	0	0	0	0	0	0
CTCGAATCAGTTCAGTCCCGGAT	23H-RNA	F31C3.7, F31C3.8, rrn-1.1, rrn-1.2		0	0	0	0	0	0	0	0		0	0	0	0	0	0	0	0
CTCGACTTTCCAGTTCTACCAT	23H-RNA	T05E12.10		0	0	0	0	0	0	0	0		0	0	0	0	0	0	0	0
CTCGCCGCAGCCATCGTCGTCG	23H-RNA	Y57G11C.1145_hairpin		0	0	0	0	0	0	0	0		0	0	0	0	0	0	0	0
CTCGCCGCAGCCATCGTCGTCGT	23H-RNA	Y57G11C.1145_hairpin		0	0	0	0	0	0	0.379373	0		0	0	0.19354	0	0	0	0	0
CTCGGAAATTGTCGGCCGCTGTG	23H-RNA	ChrV_unknown_hairpin1, other		0	0	0	0	0	0	0	0		0	0	0	0	0	0	0	0
CTCGGCATTCAGAGGCAACTTCC	23H-RNA	Unknown_RE3		0	0	0	0	4.64794	0	0.189687	0		0	0	0	0.162393	0	0	0.222818	0
CTCGGCATTCAGAGGCAACTTCT	23H-RNA	npr-34, Y54E2A.1		0	0	0	0	0	0	0	0		0	0	0	0	0	0	0	0
CTCGTAGAACGTGTCGCTTCGTC	23H-RNA	F55A4.9, rncs-1		0	0	0	0	0	0	0	0		0	0	0	0	0	0	0	0
CTCGTCGATCCAGTTTGGCCA	23H-RNA	F55A4.9, rncs-1		0	0	0.215091	0	4.64794	0	0	0.212223		0	0	0	0	0	0	0	0
CTCGTCGATCCAGTTTGGCCAA	23H-RNA	F55A4.9, rncs-1		0	0	0	0	0	0	0	0		0	0	0	0	0	0	0	0
CTCTCGATGCTCGTCGATCCAGT	23H-RNA	F55A4.9, rncs-1		0	0	0	0	0	0	0.189687	0		0	0	0.19354	0	0	0	0	0
CTCTCGTAGAACGTGTCGCTTCG	23H-RNA	F55A4.9, rncs-1		0	0	0	0.179138	4.64794	0	0	0		0	0	0	0.162393	0	0	0	0
CTCTCTCTTTCAGCTCAATGCC	23H-RNA	F55A4.9, rncs-1		0	0	0	0	0	0	0	0		0	0	0	0	0	0	0	0
CTCTTACTGTAGTTTTCGCTA	23H-RNA	PALTA4		0	13.7864	0	0.358275	4.64794	7.23544	0.948434	0		0	0	0.38708	0.162393	0	5.18806	0	0
CTCTTACTGTAGTTTTCGCTAAG	23H-RNA	PALTA4		0	4.59547	1.07545	1.4331	46.4794	72.3544	1.32781	0.424445		15.4309	15.6075	0.77416	0.487178	14.3337	15.5642	0.222818	1.26146
CTCTTCAGCTGACTACACTCTCT	23H-RNA	rft-2, Y47D7A.14_IR, Y47D7A.14_IR_element		0	0	0	0	0	0	0	0		0	0	0	0	0	0	0	0
CTCTTCGAGCGCGTCTTCTTGC	23H-RNA	ChrIII_hairpin1		0	0	0	0	4.64794	0	0	0		0	0	0	0	0	0	0	0.180209
CTCTTCGAGCGCGTCTTCTTTA	23H-RNA	ChrIII_hairpin1		0	0	0	0	0	0	0	0		0	0	0	0	0	0	0	0
CTCTTGCTTCTGTTCCAAATA	23H-RNA	F19B2.5		0	0	0	0	0	0	0	0		0	0	0	0	0	0	0	0
CTCTTGCTTCTGTTCCAAATATG	23H-RNA	F19B2.5		0	0	0	0	0	0	0	0		0	0	0	0	0	0	0	0
CTGAGGATTTTGAGTGAGGCTCA	23H-RNA	M4.2, puf-4		0	0	0	0	0	0	0	0		0	0	0.19354	0	0	0	0	0
CTGAGGATTTTGAGTGAGGCTGA	23H-RNA	M4.2, puf-4		0	0	0	0	0	0	0	0		0	0	0	0	0	0	0	0
CTGCCTGCCCAGAGCTAAGTACC	23H-RNA	T25G12.8		0	0	0	0	0	0	0	0		0	0	0	0	0	0	0	0
CTGCGGCGAGGATGATGTGGATG	23H-RNA	Y57G11C.1145_hairpin		0	0	0	0	0	0	0	0		0	0	0	0	0	0	0	0
CTGTCAATCTATTTTTCGTCTGT	23H-RNA	CTGTCAATCTATTTTTCGTCTGT_Repeat		0	0	0	0	0	0	0	0		0	0	0	0	0	0	0	0
CTGTTCTGCTCTCTCTTTCAGC	23H-RNA	F55A4.9, rncs-1		0	0	0	0	0	7.23544	0.189687	0		0	0	0.19354	0	0	0	0.222818	0.180209
CTGTTCTGCTCTCTCTTTCAGCT	23H-RNA	F55A4.9, rncs-1		0	0	0.215091	0	0	0	0	0		0	0	0	0	0	0	0	0
CTGTTCTGCTCTCTCTTTCAGCTC	23H-RNA	F55A4.9, rncs-1		0	0	0	0	0	0	0	0		0	0	0	0	0	0	0	0
CTTAGGTCACTGGTTCGAATCC	23H-RNA	other		0	0	0.645272	0.179138	0	0	0.379373	0		0	0	0	0.162393	0	0	0.222818	0.180209
CTTCAAGTTCTATTGCCGGATAT	23H-RNA	F39E9.10		0	0	0	0	0	0	0	0		0	0	0	0	0	0	0	0
CTTCATCTAAGGCTAAATATCGA	23H-RNA	F31C3.9, rrn-3.1		0	0	0.645272	0	4.64794	0	0.379373	0.424445		0	5.20251	4.06434	1.13675	0	0	0.891272	0.540626
CTTCCTTGACGACATATGGCCC	23H-RNA	other		0	0	0	0	0	0	0.189687	0.212223		0	0	0	0	0	0	0	0
CTTCGTCATCTGATGCGGTTGTTC	23H-RNA	F55A4.9, rncs-1		0	0	0	0	0	0	0	0		0	0	0	0	0	0	0	0
CTTCTATCATTCTCGAATTCCC	23H-RNA	other		0	0	0.430181	0	0	14.4709	0	0		0	5.20251	0	0	4.77791	5.18806	0	0
CTTCTGATCCTAGATGAACAATG	23H-RNA	24F12A.4, H15N14.4, Y24F12A.3		0	0	0	0.179138	0	0	0	0		0	0	0	0	0	0	0	0
CTTCTTCCACGCCATCATCCAC	23H-RNA	Y57G11C.1145_hairpin		0	0	0	0	0	0	0	0		0	0	0	0	0	0	0	0
CTTCTTCCACGCCATCATCCACA	23H-RNA	Y57G11C.1145_hairpin		0	0	0	0	0	0	0.189687	0.212223		0	0	0	0	0	0	0	0
CTTGAAAATACTAACCCGGTCA	23H-RNA	ZK1236.8		0	0	0	0	0	0	0	0		0	0	0	0	0	0	0	0
CTTGGACTTTTTCGCTGGTTTGG	23H-RNA	F55A4.9, rncs-1		0	0	0	0	0	0	0	0		0	0	0.19354	0	0	0	0	0
CTTTCAGCATCGACCACGGCTTT	23H-RNA	F55A4.9, rncs-1		0	0	0	0	0	0	0	0		0	0	0	0	0	0	0	0
CTTTGAACGGCCCTTAAAACAC	23H-RNA	F31C3.9, rrn-3.1		0	0	1.07545	0.537413	0	7.23544	0.758747	0		3.85773	0	1.16124	0.487178	4.77791	0	0.222818	1.08125
CTTTGCTCTGCGTCCGACACTTT	23H-RNA	VB0395L.1		0	0	0	0	0	0	0	0		0	0	0	0	0	0	0	0
CTTTTGTTTCTCTTCCTCTTGC	23H-RNA	F19B2.5		0	0	0	0	0	0	0	0		0	0	0	0	0	0	0	0
CTTTTGTTTCTCTTCCTCTTGCT	23H-RNA	F19B2.5		0	0	0	0	4.64794	0	0.189687	0		0	0	0	0	9.55582	0	0	0
CTTTTTCAGCGGTCTCGTTATG	23H-RNA	PAL5A		0	0	0	0.179138	0	0	0	0		0	0	0	0	0	0	0	0
CTTTTTCAGCGGTCTCGTTATGA	23H-RNA	PAL5A		0	0	0	0	0	0	0	0		0	0	0.38708	0	0	0	0	0
CTTTTTTCGTTCTATGTGAGT	23H-RNA	F52D2.6		0	0	0	0	0	0	0	0		0	0	0	0	0	0	0	0
GAAAGACTAATCGAACCATCTA	23H-RNA	F31C3.9, rrn-3.1		0	0	2.15091	1.61224	32.5356	0	1.70718	1.48556		15.4309	5.20251	1.54832	0.64957	0	0	2.89664	2.70313
GAAGACACTTTCCAATTACCC	23H-RNA	GAAGACACTTTCCAATTACCC_Repeat, Y116A8C.48		0	0	0	0	0	0	0	0		0	0	0	0	0	0	0	0
GAAGACATCTCAGAAACATCGGC	23H-RNA	F43E2.6		0	0	0	0	0	7.23544	0.189687	0		0	0	0	0.162393	4.77791	0	0.222818	0
GAAGAGCCGACATCGAAGGATCA	23H-RNA	F31C3.10, F31C3.9, rrn-3.1, rrn-3.56		0	0	0	0	0	0	0	0		0	0	0	0	0	0	0	0
GAAGGCGCGCTCGAAGAGCCGAG	23H-RNA	ChrIII_hairpin1		0	0	0	0	9.29587	0	0	0.212223		0	0	0.19354	0	0	0	0	1.08125
GAAGGCGCGCTCGAAGAGCCGAGA	23H-RNA	ChrIII_hairpin1		0	0	0.645272	1.4331	4.64794	0	1.32781	1.06111		0	5.20251	0.77416	0.162393	0	0	0.668454	0.901043
GAATCAGAACACGGGGGCGACA	23H-RNA	hmg-1.1, Y48B6A.14		0	0	0	0.179138	0	0	0	0		0	0	0	0	0	0	0	0
GAATTGTGAAGACATCTCAGAAA	23H-RNA	F43E2.6		0	0	0.215091	0	0	14.4709	0	0		0	0	0	0	0	0	0.222818	0
GACAGTCCCCACTCTTCTCGA	23H-RNA	F31C3.7, F31C3.8, rrn-1.1, rrn-1.2		0	0	0	0	0	0	0.189687	0		3.85773	0	0	0.162393	0	0	0.222818	0.180209
GACATCTCAGAAACATCGGCA	23H-RNA	F43E2.6		0	0	0	0	0	0	0.189687	0		0	0	0	0	0	0	0	0
GACATCTCAGAAACATCGGCAA	23H-RNA	F43E2.6		0	0	0	0	0	0	0	0		0	0	0	0	0	0	0	0
GACATCTCAGAAACATCGGCAAA	23H-RNA	F43E2.6		0	0	0	0	0	7.23544	0	0		0	0	0	0	0	0	0	0
GACCAAGTCGTATGCAAGTGAT	23H-RNA	F31C3.10, F31C3.9, rrn-3.1, rrn-3.56		0	0	0	0.358275	0	0	0	0.212223		0	0	0	0.811963	0	0	0.222818	0.180209
GACGGGCGGTGTGTACAAAGGG	23H-RNA	F31C3.7, F31C3.8, rrn-1.1, rrn-1.2		0	0	0.430181	0	0	0	0	0		0	0	0.19354	0	0	0	0.222818	0
GACGTACCAACTGGAGGCCCA	23H-RNA	F31C3.11, rrn-2.1		0	0	0	0	0	0	0.189687	0		0	0	0	0.162393	0	0	0.222818	0.720835
GACTGGACCAAACCGCGCGCT	23H-RNA	E01G4.5		0	0	0	0.179138	0	0	0	0		0	5.20251	0	0	4.77791	0	0.445636	0
GAGTCGATGAAAGTGGTGGTAT	23H-RNA	F31C3.9, rrn-3.1		0	0	0	0	0	0	0.189687	0		0	0	0	0	0	0	0	0
GATAGTCTCAACAGATCGCAGT	23H-RNA	F31C3.10, F31C3.9, rrn-3.1, rrn-3.56		0	0	0	0	0	0	0	0.212223		0	0	0.19354	0	0	0	0	0
GATGGTCGACAACCGACGAACA	23H-RNA	F19G12.10		0	0	0	0	4.64794	0	0	0		0	0	0	0	0	0	0	0
GATTTAGCGCCCCGACATTGA	23H-RNA	F31C3.10, F31C3.9, rrn-3.1, rrn-3.56		0	0	0	0	0	0	0	0		0	5.20251	0	0.487178	0	0	0	0
GCAAGCTGCGTTCTTCATCGAT	23H-RNA	F31C3.11, rrn-2.1		0	0	0	0.179138	0	0	0	0		0	0	0	0	0	0	0	0
GCAAGTGATTTAGCGCCCCGAC	23H-RNA	F31C3.10, F31C3.9, rrn-3.1, rrn-3.56		0	0	0	0	0	0	0	0.636668		0	0	0	0.487178	0	0	0.222818	0
GCAGCCAAAGACTGATCGATTC	23H-RNA	F31C3.9, rrn-3.1		0	0	0	0	0	0	0	0		0	0	0.38708	0	0	0	0	0
GCCCGGTGTTGTACGTAGGTGG	23H-RNA	T05E12.8		0	0	0	0	0	0	0.379373	0		0	0	0	0	0	0	0	0
GCCCTTACCGTTTAATACATGTT	23H-RNA	mir-5592		0	0	0	0.358275	0	0	0.56906	0		0	0	0	0	0	0	0.222818	0.360417
GCCGATGTTTCTGAGATGTCTTC	23H-RNA	F43E2.6		0	4.59547	0.860363	0	23.2397	28.9417	1.32781	1.06111		0	0	0	0.162393	0	15.5642	1.55973	0.360417
GCCGATGTTTCTGAGATGTCTTCA	23H-RNA	F43E2.6		0	0	0	0	0	0	0	0		0	0	0	0	4.77791	0	0	0.360417
GCGCCCCGACATTGAACCAGAG	23H-RNA	F31C3.10, F31C3.9, rrn-3.1, rrn-3.56		0	0	0	0	0	0	0.189687	0		0	0	0.19354	0	0	0	0	0
GCGGAGATTCACTGGAGATTTG	23H-RNA	lin-5, T09A5.10		0	0	0	0.179138	0	0	0	0		0	0	0	0	4.77791	0	0	0.180209
GCGTGCAGCCCCGGACATCTAA	23H-RNA	F31C3.7, F31C3.8, rrn-1.1, rrn-1.2		0	0	0	0	0	0	0	0		0	0	0.19354	0	0	0	0	0
GCTACACCTCTCATGACTCTT	23H-RNA	F31C3.9, rrn-3.1		0	0	0.215091	0.179138	0	0	0.379373	0		0	0	0	0	0	0	0	0
GGACCACCGAGACGCATGATA	23H-RNA	Y37E3.30		0	0	0	0	4.64794	0	0	0.212223		0	0	0	0	0	0	0.222818	0
GGAGCTGGACGATGGATTCTT	23H-RNA	F55A4.9, rncs-1		0	0	0	0	0	0	0.189687	0		0	0	0	0	0	0	0	0
GGAGCTGGACGATGGATTCTTTG	23H-RNA	F55A4.9, rncs-1		0	0	0	0	0	0	0.189687	0		0	0	0	0	0	0	0	0
GGAGGGATGCGAAATAAATATTTT	23H-RNA	Y57G11C.36, Y57G11C.51		0	0	0.430181	0	0	0	0	0.636668		3.85773	0	0	0	0	0	0	0
GGAGTGGATGACGACGACGATGG	23H-RNA	Y57G11C.1145_hairpin		0	0	0.430181	0.358275	0	0	0	0		0	0	0.19354	0	0	0	0	0
GGATTTCGTCAAGACCGAGGAGCT	23H-RNA	C36A4.14		0	0	0	0.179138	0	0	0.379373	0.212223		0	0	0	0.487178	0	0	0	0
GGCCCTTACCGTTTAATACATGT	23H-RNA	mir-5592		0	0	0	0.179138	0	0	0	0.212223		0	0	0	0	0	0	0.222818	0
GGGAGGAAAGCTGGGATTATCC	23H-RNA	Y37E3.30		0	0	0	0	0	0	0.379373	0		0	0	0	0	0	0	0	0
GGGATAAGAGCTCGTCCGATGGCG	23H-RNA	T05E12.8		0	0	0	0	0	0	0	0		0	0	0	0	0	0	0	0
GGGCATCGAGCTGAAAGAGAGAGC	23H-RNA	F55A4.9, rncs-1		0	0	0	0	0	0	0	0		0	0	0	0	0	0	0	0
GGTGAGGTGTTGGTGCTGATGGCA	23H-RNA	C36A4.14		0	0	0	0	0	0	0	0		0	0	0	0	0	0	0	0
GGTGGAGTGGATGACGACGACGA	23H-RNA	Y57G11C.1145_hairpin		0	0	0.860363	0.179138	9.29587	0	0.56906	0.424445		0	0	0.9677	0.324785	4.77791	0	0.222818	0.180209
GTATTAAACGGTAAGGGCCGGCT	23H-RNA	mir-5592		0	0	8.60363	9.67343	0	0	12.3296	7.85223		0	15.6075	7.7416	6.33331	33.4454	10.3761	8.02145	13.6959
GTCGTCGTCATCCACTCCACCG	23H-RNA	Y57G11C.1145_hairpin		0	9.19093	0	0.179138	18.5917	36.1772	0.948434	0.424445		0	0	0	0	0	0	1.11409	0.180209
GTGAAGACATCTCAGAAACATCG	23H-RNA	F43E2.6		0	0	0	0	0	0	0	0		0	0	0	0	0	0	0	0
GTGGAGCTGGACGATGGATTCTTT	23H-RNA	F55A4.9, rncs-1		0	0	0	0	0	0	0	0		0	0	0	0	0	0	0	0
GTGGAGTGGATGACGACGACG	23H-RNA	Y57G11C.1145_hairpin, Y57G11C.51		0	0	0.215091	0	0	0	0.189687	0		0	0	0	0	0	0	0	0.360417
GTGGAGTGGATGACGACGACGA	23H-RNA	Y57G11C.1145_hairpin		0	4.59547	0.215091	0.179138	4.64794	7.23544	0.189687	0		3.85773	0	0.19354	0	0	0	0.445636	0.540626
GTGTAACAATCTATTTTTTCGT	23H-RNA	GTGTAACAATCTATTTTTTCGT_repeat		0	0	0	0	0	0	0	0		0	0	0	0	0	0	0	0
GTTCTGTGGGCGGGGCCAATCC	23H-RNA	DNA-8-1		0	0	0	0	0	14.4709	0	0		0	0	0	0	0	0	0	0
GTTTGATCTCCGAGAATTGCGGG	23H-RNA	dnj-27_element		0	0	0	0	0	0	0	0		0	0	0	0	0	0	0	0
GTTTGGCCAAGCGGACTGGAGC	23H-RNA	F55A4.9, rncs-1		0	0	0	0	0	0	0	0		0	0	0	0	0	0	0	0
GTTTGGCCAAGCGGACTGGAGCA	23H-RNA	F55A4.9, rncs-1		0	0	0	0	0	0	0	0		0	0	0	0	0	0	0	0
TAAAAAATTCAAATTTAACTCCG	23H-RNA	Y69A2AR.16_hairpin		0	0	0.215091	0	0	0	0	0		0	0	0	0	4.77791	0	0	0.180209
TAAAACTGCGTGGCGTGTACTGC	23H-RNA	PALTA3		0	0	0.215091	0.358275	9.29587	14.4709	0.379373	0		0	10.405	0	0	0	0	0	0.180209
TAAACATAGCGGCGCGCGGAAC	23H-RNA	PALTA3		0	9.19093	0	0	0	0	0	0		0	0	0.19354	0	0	0	0.222818	0
TAAACGCAGCGGCGCGCGGAACC	23H-RNA	PALTA3		0	0	0	0	0	0	0	0		0	0	0	0	0	0	0	0
TAAAGACGTGGTTTTGACGAAAA	23H-RNA	other, Y54G11A.1		0	0	0	0.179138	0	0	0	0		0	0	0.38708	0	4.77791	0	0	0
TAAAGTCCATGGACGGCGAGATT	23H-RNA	other		0	0	0	0	0	0	0	0		0	0	0	0	0	0	0	0
TAAAGTCGATGGACGGCGAGATT	23H-RNA	PALTTAA1		0	0	0	0	0	14.4709	0	0		3.85773	0	0	0	0	0	0	0
TAAATCTACTTAAATCAACGAAT	23H-RNA	mek-2, Y54E10BL.6, Y71F9AL.1		0	0	0	0	0	0	0	0		0	0	0	0	0	0	0	0
TAACAGGGATGAAGTAACGCC	23H-RNA	other		0	0	0	0	0	0	0	0		0	0	0	0	0	0	0	0
TAACGAGACCGCTGAAAAAGTC	23H-RNA	W09C5.9		0	0	0	0	0	0	0	0		0	0	0	0	0	0	0	0
TAACGAGACCGCTGAAAAAGTT	23H-RNA	PAL5A		0	0	0	0	0	7.23544	0	0		0	0	0	0	0	0	0	0
TAACGAGACCGCTGAAAAAGTTC	23H-RNA	PAL5A		0	0	0	0	0	0	0	0		0	0	0	0	0	0	0	0
TAACGAGACCGCTGAAAAAGTTT	23H-RNA	PAL5A		0	0	0	0	4.64794	0	0	0		0	0	0	0	0	0	0	0.540626
TAATTGGAAAAGATTAGAGATG	23H-RNA	F55A4.9, rncs-1		0	0	0	0	0	0	0	0		0	0	0	0	0	0	0.222818	0
TACAACGTGCAACTAAGACACCC	23H-RNA	Y37E3.30		0	0	0	0	0	0	0	0		0	0	0	0	0	0	0	0
TACACGAGCTGCGTAAATCGAC	23H-RNA	other		0	0	0	0	0	0	0	0		0	0	0	0	0	0	0	0
TACATAGATGCCGAGTACAACCC	23H-RNA	E01G4.5		0	0	0	0.179138	0	0	0	0.212223		0	0	0	0	0	0	0	0
TACCGTACCCCGAAAACTAGAA	23H-RNA	ChrIII_hairpin2		0	0	0	0	0	0	0	0		0	0	0	0	0	0	0	0
TACCTGATTTTCATAACGAGACC	23H-RNA	PAL5A		0	0	0	0	0	0	0	0		0	0	0	0	0	0	0	0
TACGAGGGAATTGACTAGTTTCA	23H-RNA	F55A4.9, rncs-1		0	0	0	0	0	0	0.189687	0		0	0	0	0	0	0	0	0
TACGGGAAAAGCAGAGAGGCC	23H-RNA	F39E9.7		0	0	0	0	0	0	0.189687	0		0	0	0	0	0	0	0	0.180209
TACGGGAAAAGCAGAGAGGCCA	23H-RNA	F39E9.7		0	0	0	0	0	0	0	0.212223		0	0	0	0	0	0	0	0
TACGGGAAAAGCAGAGAGGCCAC	23H-RNA	F39E9.7		0	0	0	0	0	0	0	0		0	0	0	0	0	0	0	0
TACGGTTTGATCTACAAAAAATGC	23H-RNA	CELE14B		0	0	0	0	0	0	0	0.212223		0	0	0	0	0	0	0	0
TACGTCACAACTGTATTAAAAT	23H-RNA	TC8		0	0	0	0	0	0	0	0		0	0	0	0	0	0	0	0
TACGTTTACATGGAGGTCCCGC	23H-RNA	F39E9.29_region, F39E9.7		0	0	0.645272	0	0	7.23544	0	0.212223		0	5.20251	0	0	0	0	0	0.180209
TACTGTAGCGCTGGTGTCGATTT	23H-RNA	other		0	0	0	0	0	0	0	0		0	0	0	0	0	0	0	0
TACTGTAGCGCTTGTGTCGATT	23H-RNA	CELE1		0	0	0	0	0	0	0	0		0	0	0	0	0	0	0	0
TACTGTAGCGCTTGTGTCGATTT	23H-RNA	CELE1		0	0	0	0	0	0	0	0		0	0	0	0	0	0	0	0
TAGAACGTGTCGCTTCGTCATCTG	23H-RNA	F55A4.9, rncs-1		0	0	0	0	0	0	0	0		0	0	0	0	0	0	0	0
TAGAAGACCACTTCCGCAGACG	23H-RNA	Y37E3.30		0	0	0	0	0	0	0	0		0	0	0	0	0	0	0	0.180209
TAGAAGACCACTTCCGCAGACGC	23H-RNA	Y37E3.30		0	0	0	0	0	0	0	0		0	0	0	0	0	0	0	0
TAGAAGCCGCCGGGATGGACACC	23H-RNA	E01G4.5		0	0	0	0	4.64794	0	0.379373	0		0	0	0	0	0	0	0	0
TAGATCAAACCGTCATGGGAC	23H-RNA	CELE14B		0	0	0.215091	0	4.64794	0	0	0		0	0	0	0	0	0	0	0
TAGATCAAACCGTCATGGGACA	23H-RNA	CELE14B		0	0	0.215091	0.179138	4.64794	0	0.379373	0		0	0	0	0	4.77791	5.18806	0.222818	0.360417
TAGCCTGAGTCTCAACCAAAAC	23H-RNA	hpo-13, Y105E8A.10		0	0	0	0	0	0	0	0		0	0	0	0	0	0	0	0
TAGCGAAAACTACAGTAAGAACT	23H-RNA	PALTA4		0	0	0	0	0	0	0.379373	0		0	0	0	0	0	0	0	0
TAGCGAAAACTACAGTAATTCTT	23H-RNA	CELE1		0	0	0	0	0	0	0	0		0	0	0	0	0	0	0	0.180209
TAGGATAATGTCTGGAAATACGG	23H-RNA	B0281.4		0	0	0	0	0	0	0.379373	0		0	0	0	0	0	0	0	0
TAGGGGAAAAGATGTTGAATG	23H-RNA	other		0	0	0	0	0	0	0	0		0	0	0	0	0	0	0	0
TAGTTTGTAGCCTGAGCCTCAAC	23H-RNA	other		0	0	0	0	0	0	0	0		3.85773	0	0	0	4.77791	0	0	0
TAGTTTTGATGACTGGATCTACC	23H-RNA	Y116F11A.1		0	0	0	0.179138	0	0	0	0		0	0	0.19354	0	0	0	0	0
TATACCACTCTATCAGACTACT	23H-RNA	W04C9.8		0	0	0	0	0	0	0	0		0	0	0	0	0	0	0	0
TATCAGGCCGCCGACATCTCATG	23H-RNA	PALTA3		0	0	0	0	0	0	0	0		0	0	0	0	0	5.18806	0	0
TATCCACGACGGCCGACAATTTCC	23H-RNA	Unknown_hairpin_RE2		0	0	0	0	0	0	0	0		0	0	0	0	0	0	0	0
TATCCACTGAGCTATCCATGC	23H-RNA	irld-17, Y46H3D.4		0	0	0	0	0	0	0	0		0	0	0	0	0	0	0	0
TATCGCACTCTTTGCCCTTCCGC	23H-RNA	jmjc-1, T28F2.4		0	0	0	0	0	0	0	0		0	0	0	0	0	0	0	0
TATCTACACTCTCTGTACCGG	23H-RNA	Unknown_RE2		0	0	0	0	0	0	0	0		0	0	0	0	0	0	0	0
TATCTCGATACCATGTCTCACC	23H-RNA	Y37E11B.2		0	0	0	0.179138	4.64794	14.4709	0.189687	0.212223		0	0	0	0.324785	0	0	0.222818	0
TATCTCGATACCATGTCTCACCC	23H-RNA	Y37E11B.2		0	0	1.29054	0.358275	0	14.4709	0.379373	0.212223		3.85773	0	0.38708	0.162393	0	5.18806	1.33691	0.180209
TATCTCGATACCATGTCTCACCCA	23H-RNA	Y37E11B.2		0	0	0	0	0	0	0	0		0	5.20251	0	0	0	0	0	0
TATGTTTAACTCGCAGCGGGCA	23H-RNA	other		0	0	0	0	0	0	0	0		0	0	0	0	0	5.18806	0	0
TATTAGACTCCACATATCATTTC	23H-RNA	Y37E11B.2		0	4.59547	0.215091	0	13.9438	0	0	0.84889		3.85773	0	0	0	0	5.18806	0.222818	0.360417
TATTGAAAATGTGGGATGACGC	23H-RNA	E01G4.7		0	0	0	0	0	0	0	0		0	0	0	0	0	0	0	0
TATTTGGAACAGAAGCAAGAGG	23H-RNA	F19B2.5		0	0	0	0	0	0	0	0		0	0	0	0	0	0	0	0
TATTTTCCGACTTCTCATGAGCC	23H-RNA	other		0	0	0.430181	0	0	0	0.379373	0		3.85773	0	0	0	0	0	0	0
TATTTTTTGGCACCGCTGTTCTG	23H-RNA	F55A4.9, rncs-1		0	0	0	0	4.64794	7.23544	0.189687	0		0	0	0	0	9.55582	0	0	0
TCAAAATCGGACGACCGGACGC	23H-RNA	Unknown_hairpin_RE2		0	0	0	0	0	0	0	0		0	0	0	0	0	0	0	0
TCAAAATTTGACGGTGATTTCAA	23H-RNA	PALTTAA1		0	0	0	0	0	0	0	0		0	0	0	0	0	0	0	0
TCAAACATTCGGCAATGGGGTA	23H-RNA	Y37E3.30		0	0	0.645272	0	9.29587	7.23544	0.56906	0		0	0	0	0	4.77791	0	0	0
TCAAAGGATCCGGTGAGGCTA	23H-RNA	W04B5.8		0	0	0	0	0	0	0	0		0	0	0	0	0	0	0	0
TCAAAGGATCCGGTGAGGCTAA	23H-RNA	W04B5.8		0	0	0	0	0	0	0	0		0	0	0	0	0	0	0	0
TCAACTTCTTCCACGCCATCATC	23H-RNA	Y57G11C.1145_hairpin		0	0	0	0	0	0	0	0		0	0	0	0	0	0	0	0
TCAATAAAAACAATGGACAACT	23H-RNA	Y59H11AR.6		0	0	0	0	4.64794	0	0	0		0	0	0	0	0	0	0	0
TCAATAAAAACAATGGACAACTG	23H-RNA	Y59H11AR.6		0	0	0	0	0	0	0	0		0	0	0	0	0	0	0	0
TCACGAGGGACGAGGAAAAGTG	23H-RNA	PAL5A		0	0	0	0	0	0	0	0		0	0	0	0	0	0	0	0
TCACGCATTTTTTGTAGATCAAA	23H-RNA	other, Y57A10A.1		0	0	0	0	0	0	0	0		0	0	0	0	0	0	0	0
TCACGGAGTTAAATTTGAATT	23H-RNA	Y69A2AR.16_hairpin		0	4.59547	0.215091	0	0	0	0	0		0	5.20251	0	0.162393	0	0	0	0
TCACGGAGTTAAATTTGAATTTT	23H-RNA	Y69A2AR.16_hairpin		0	0	0.645272	0.179138	0	0	0	0		0	0	0	0	9.55582	0	0	0
TCACGGAGTTAAATTTGAATTTTT	23H-RNA	Y69A2AR.16_hairpin		0	0	0.215091	0	4.64794	0	0	0		0	5.20251	0	0	9.55582	10.3761	0	0
TCACGGCAACTCGGTCCAAAACC	23H-RNA	PALNN1		0	0	0	0	0	0	0	0		3.85773	0	0	0	0	5.18806	0	0
TCACGGGGAAAAGGCAAAATTCG	23H-RNA	PALTA3		0	0	0	0	0	0	0	0		0	0	0	0	0	0	0	0
TCACGTCATTATGTCACAATCCC	23H-RNA	F39F10.4		0	0	0	0	0	0	0	0		0	0	0	0	0	0	0	0
TCACTGTTGCGGATGGTCCAGG	23H-RNA	F57G8.14, F57G8.15, linc-59		0	0	0	0	0	0	0	0		0	0	0	0	0	0	0	0
TCAGAAACATCGGCAAATGGC	23H-RNA	F43E2.6		0	0	0	0	0	0	0	0		0	0	0	0	0	0	0	0
TCAGCGGTCTCGTTATGAAAATC	23H-RNA	PAL5A		0	0	0	0	0	0	0	0		0	0	0	0	0	0	0	0
TCAGGCCGCCGACATCCTACGGG	23H-RNA	PALTA3		0	0	0	0	0	0	0	0		0	0	0	0	0	0	0	0
TCAGGCCGCCGACATCTCACGGG	23H-RNA	PALTA3		0	0	0	0	0	0	0	0		0	0	0	0	0	0	0	0
TCAGGCCGCCGACATCTCATG	23H-RNA	PALTA3		0	0	0	0.179138	0	0	0	0		0	0	0	0	0	0	0	0
TCAGGCCGCCGACATCTCATGGA	23H-RNA	Y105C5B.11		0	0	0	0	4.64794	0	0	0		0	0	0	0	0	0	0	0
TCAGGCCGCCGACATCTCATGGG	23H-RNA	PALTA3		0	0	0	0.179138	0	0	0.189687	0		0	0	0	0	0	0	0	0
TCAGGCCGCCGACATCTCATGGGT	23H-RNA	PALTA3		0	0	0	0	0	0	0	0		0	0	0	0	0	0	0	0
TCATCAGCTCCATCAACACCA	23H-RNA	C36A4.14		0	0	0	0	0	0	0	0		0	0	0	0	0	0	0	0
TCATCAGCTCCATCAACACCACC	23H-RNA	C36A4.14		0	0	0.215091	0	0	0	0	0.424445		0	0	0	0	0	0	0.222818	0
TCATCAGCTCCATCAACACCACCA	23H-RNA	C36A4.14		0	0	0	0	0	0	0	0		0	0	0	0	0	0	0	0
TCATCCTCGCCGCAGCCATCGT	23H-RNA	Y57G11C.1145_hairpin		0	0	0	0.179138	0	0	0	0		0	0	0	0	0	0	0	0
TCATCCTCGCCGCAGCCATCGTC	23H-RNA	Y57G11C.1145_hairpin		0	0	0	0	0	7.23544	0	0.424445		0	0	0	0.324785	4.77791	10.3761	0	0
TCATCCTCGCCGCAGCCATCGTCG	23H-RNA	Y57G11C.1145_hairpin		0	0	0	0	0	0	0	0		0	0	0	0	0	0	0	0
TCATCTAAGGCTAAATATCGA	23H-RNA	F31C3.9, rrn-3.1		0	0	0.430181	0.358275	0	0	0	0.212223		3.85773	5.20251	0.38708	0.324785	0	0	0.891272	0.540626
TCATCTCAACCAAGATCTCAAC	23H-RNA	F52D2.6		0	0	0	0	0	0	0	0		0	0	0	0	0	0	0	0
TCATCTCTGATCTTTTCCAATT	23H-RNA	F55A4.9, rncs-1		0	0	0.215091	0.179138	0	0	0	0		0	0	0	0	0	0	0.222818	0
TCATCTCTGATCTTTTCCAATTC	23H-RNA	F55A4.9, rncs-1		0	0	0	0	4.64794	0	0	0		0	0	0	0	4.77791	0	0	0
TCATGATTTATTGTTCCCGTAAT	23H-RNA	PALTA4		0	0	0	0	0	0	0	0		3.85773	0	0	0	0	0	0	0
TCATGCGTCTCGGTGGTCCGA	23H-RNA	Y37E3.30		0	0	0	0.179138	0	7.23544	0	0		0	5.20251	0	0	0	0	0	0
TCCACATCATCCTCGCCGCAGCC	23H-RNA	Y57G11C.1145_hairpin		0	0	0	0	0	0	0	0		0	0	0	0.162393	0	0	0	0
TCCACGCCATCATCCACATCATCC	23H-RNA	Y57G11C.1145_hairpin		0	0	0	0	0	0	0	0		0	0	0	0	0	0	0	0
TCCACGGCGGCCGACAATTTC	23H-RNA	Unknown_hairpin_RE2		0	0	0	0	0	0	0	0		0	0	0	0	0	0	0	0
TCCACGGCGGCCGACAATTTCC	23H-RNA	Unknown_hairpin_RE2		0	0	0	0	0	21.7063	0	0		0	0	0	0	4.77791	0	0	0
TCCACGGCGGCCGACAATTTCCG	23H-RNA	Unknown_hairpin_RE2		0	0	0.215091	0	13.9438	0	0	0		0	0	0.19354	0	0	0	0	0
TCCATTGTATTTTCTCAGGACC	23H-RNA	F39E9.28		0	0	0	0	0	0	0	0.424445		0	0	0	0	0	5.18806	0.445636	0.540626
TCCCCGTCAACATAAACTTTTT	23H-RNA	TC5		0	0	0.860363	0.358275	0	0	0	0		7.71546	0	0.58062	0.162393	0	0	0	0.180209
TCCCGCAATTCTCGTAGATCAAA	23H-RNA	other		0	0	0	0	0	0	0	0		0	0	0	0	0	0	0	0
TCCCGCATTTCTTGTAGATCAAA	23H-RNA	CELE14B		0	0	0.215091	0	0	0	0	0		0	0	0.19354	0	0	0	0	0
TCCCGCATTTCTTGTAGATCACA	23H-RNA	H24K24.4, trm-2A		0	0	0	0	0	0	0	0.212223		0	0	0	0	0	0	0	0
TCCCGCATTTTTCGTAGATCAAA	23H-RNA	CELE14B		0	0	0	0	0	0	0	0		0	0	0	0	0	0	0	0
TCCCGCATTTTTGTAGATCACA	23H-RNA	CELE14B		0	0	0	0	4.64794	0	0	0		0	0	0	0	0	0	0	0.360417
TCCCGCATTTTTTGTAGATCAA	23H-RNA	CELE14B		0	0	0	0	0	0	0	0		0	0	0	0	0	0	0	0
TCCCGCATTTTTTGTAGATCAAA	23H-RNA	CELE14B		0	0	0	0	0	0	0.56906	0		3.85773	0	0	0.487178	0	0	0	0
TCCCGCATTTTTTGTAGATCACA	23H-RNA	CELE14B		0	0	0	0	0	0	0	0		0	0	0	0	0	0	0	0
TCCCGCATTTTTTGTAGATCAGA	23H-RNA	CELE14B		0	0	0	0	0	0	0	0		0	0	0	0	0	0	0	0
TCCCGGATGTCTGTCACTCTCT	23H-RNA	Unknown_RE2		0	0	0	0	0	0	0	0		0	0	0	0	0	0	0	0
TCCGAACAAAAGAGTAACTATT	23H-RNA	other		0	0	0	0	0	0	0	0		0	0	0	0	0	0	0	0
TCCGATTTCTGCCCCCCAAAAT	23H-RNA	PAL8C		0	0	0	0	0	0	0	0		0	0	0	0	0	0	0	0
TCCGATTTCTGCCCCCCAAAATG	23H-RNA	PAL5A		0	0	0	0	0	0	0	0		0	0	0	0	0	0	0	0
TCCGATTTCTGCCCCCCCAAA	23H-RNA	PAL8C		0	0	0.215091	0	0	0	0	0		0	0	0	0	0	0	0	0
TCCGATTTCTGCCCCCCCAAAA	23H-RNA	PAL8C		0	0	0	0	0	0	0	0		0	0	0	0	0	0	0	0
TCCGATTTCTGCCCCCCCAAAAT	23H-RNA	PAL8C		0	0	0	0	0	0	0	0		0	0	0.19354	0	0	0	0	0
TCCGATTTCTGCCCCCCCAAAATG	23H-RNA	PAL8C		0	0	1.29054	1.07483	0	7.23544	0.758747	0		0	0	0.9677	0.811963	0	0	0	0
TCCGCGCACCGCTATGTTTAACT	23H-RNA	other, Y64G10A.10		0	0	0	0	0	0	0	0		0	0	0	0	0	0	0	0
TCCGCGCGCCGCTACGTTTAACT	23H-RNA	other, Y105C5A.15		0	0	0	0	0	0	0	0		0	0	0	0	0	0	0	0
TCCGCGCGCCGCTATGTTTAAC	23H-RNA	PALTA3		0	18.3819	0	0	9.29587	28.9417	0	0.212223		0	0	0	0	4.77791	0	0	0
TCCGCGCGCCGCTATGTTTAACT	23H-RNA	PALTA3		0	4.59547	0	0.358275	27.8876	36.1772	0.379373	0.212223		0	0	0	0	19.1116	15.5642	0	0.360417
TCCGCGCGCCGCTATGTTTAACTT	23H-RNA	PALTA3		0	0	0	0	0	0	0	0		0	0	0	0	0	0	0	0
TCCGCGCGCCGCTGCGTTTAACT	23H-RNA	PALTA3		0	0	0	0	0	0	0	0		0	0	0	0	0	0	0	0
TCCGCGCGCCGCTGTGTTTAACT	23H-RNA	other		0	0	0	0	0	0	0	0		0	0	0	0	0	0	0	0
TCCGCGCGTCGCTATGTTTAACT	23H-RNA	PALTA3		0	0	0	0	0	0	0	0		0	0	0	0	0	5.18806	0	0
TCCGGCGTCCCTTTTGTAGAAAA	23H-RNA	mtd-1, other, ZK337.5		0	0	0	0	0	0	0.379373	0		0	0	0	0	0	0	0	0
TCCGGTTCAGAGCAGATGACAA	23H-RNA	Y17D7C.3		0	0	0	0	0	0	0	0		0	0	0	0	0	0	0	0
TCCGGTTCAGAGCAGATGACAAC	23H-RNA	Y17D7C.3		0	0	0	0.358275	0	0	0	0.424445		0	0	0	0	0	0	0	0
TCCGTCAGTCTTTTGTGAACAA	23H-RNA	dnj-12, F39B2.10		0	0	0	0	0	0	0	0		0	0	0	0	0	0	0	0
TCCGTGTCACATCTGTCCGAA	23H-RNA	PALTTAA3		0	0	0	0	0	0	0	0		0	0	0	0	0	0	0	0
TCCGTGTCACATCTGTCCGAAAT	23H-RNA	other		0	0	0	0	0	0	0	0		0	0	0	0	0	0	0	0
TCCTCAGCCTCACTTAAACTCTT	23H-RNA	M4.2, puf-4		0	0	0	0	0	0	0	0		0	0	0	0	0	0	0	0
TCCTCATCTCTGATCTTTTCCA	23H-RNA	F55A4.9, rncs-1		0	0	0	0	0	0	0	0		0	0	0	0	0	0	0	0
TCCTCATCTCTGATCTTTTCCAA	23H-RNA	F55A4.9, rncs-1		0	0	0	0	0	0	0	0		0	0	0	0	0	0	0	0
TCCTCGGTCTTGACGAAATCCC	23H-RNA	C36A4.14		0	0	0	0	0	0	0	0		0	0	0	0	0	0	0	0
TCGACAACTAATTCCCGAATCT	23H-RNA	T05E12.8		0	0	0	0	9.29587	7.23544	0	0		0	0	0	0	0	5.18806	0	0
TCGACAACTAATTCCCGAATCTC	23H-RNA	T05E12.8		0	9.19093	0.430181	0.179138	9.29587	0	0.189687	0.424445		0	5.20251	0	0	9.55582	5.18806	0	0.360417
TCGACACATTGATCATGCTGATA	23H-RNA	other		0	0	0	0	0	14.4709	0.189687	0		0	0	0	0	0	0	0	0
TCGCCGCAGCCATCGTCGTCGTC	23H-RNA	Y57G11C.1145_hairpin		0	0	0	0	0	0	0	0		0	0	0	0.162393	0	0	0	0
TCGCGACCAGCCCTGCGTCTTGC	23H-RNA	Y57G11C.51		0	0	0	0.179138	0	0	0.379373	0.212223		0	0	0	0	0	0	0	0
TCGCGTAGATCACATGTAGATCA	23H-RNA	pcp-4, Unknown_RE8, Y116F11B.3, Y15E3A.3, Y6B3B.7, Y6B3B.9		0	0	0	0	0	0	0	0		0	0	0	0	0	0	0	0
TCGGAAACTGAAGCCCCAAAATC	23H-RNA	other		0	0	0	0	0	0	0	0		0	0	0	0	0	0	0.222818	0
TCGGAAATTGTCGGCCGCCGTG	23H-RNA	Unknown_hairpin_RE2		0	0	0	0	0	0	0	0		0	0	0	0	0	0	0	0
TCGGCTCTTCGAGCGCGTCTTCTT	23H-RNA	ChrIII_hairpin1		0	0	0	0	0	7.23544	0.758747	0		0	0	0	0	0	0	0	0
TCGGGGACCAACCAATATCAGGC	23H-RNA	PALTA3		0	0	0	0	0	0	0	0.212223		0	0	0	0	0	0	0	0
TCGGGGACCAACCAATATCAGGT	23H-RNA	C34G6.1, H05C05.2, hpo-27		0	0	0	0	0	0	0	0		0	0	0	0	0	0	0	0
TCGGGGGATGTCCAATTGGGGG	23H-RNA	DNA-8-1		0	0	0	0	0	0	0	0		0	0	0	0	0	0	0	0
TCGTATGATGCAAGTGGAATTT	23H-RNA	F52D2.6		0	0	0	0	4.64794	14.4709	0	0		0	0	0	0	0	0	0	0
TCGTCGTCATCCACTCCACCG	23H-RNA	Y57G11C.1145_hairpin		0	0	0	0.179138	9.29587	21.7063	0.56906	0.636668		0	0	0.38708	0	4.77791	0	0	0
TCGTCGTCGTCATCCACTCCAC	23H-RNA	Y57G11C.1145_hairpin		0	4.59547	0.215091	0.71655	4.64794	0	0	0.212223		0	0	0.38708	1.13675	0	0	0	0
TCGTCGTCGTCATCCACTCCACC	23H-RNA	Y57G11C.1145_hairpin		0	0	0	0	13.9438	14.4709	0.758747	0.212223		0	0	0	0.162393	0	0	0	0.720835
TCGTCGTCGTCATCCACTCCACT	23H-RNA	Y57G11C.1145_hairpin		0	0	0	0.179138	18.5917	0	0.189687	0.424445		0	0	0	0.162393	0	0	0	0
TCGTTGATTTAAGTAGATTTATG	23H-RNA	Y71F9AL.1_hairpin		0	0	0	0	4.64794	0	0	0		0	0	0	0	0	0	0	0
TCTACAGAAGGGACGCCGGAAA	23H-RNA	other		0	0	0	0	0	0	0	0		0	0	0	0	0	0	0	0
TCTACAGAGTCTGGAGAATGT	23H-RNA	C36A4.11, K06B9.6		0	18.3819	0	0.179138	13.9438	7.23544	0.379373	0.212223		0	15.6075	0.38708	0.324785	9.55582	0	0.445636	0.180209
TCTCAATGGAAAATTCTGCATG	23H-RNA	F31A9.2		0	0	0.215091	0.179138	4.64794	14.4709	0.379373	0.212223		0	0	0	0	0	0	0	0
TCTCAGAAACATCGGCAAATGG	23H-RNA	F43E2.6		0	0	0.430181	0	9.29587	0	0	0		0	0	0.19354	0.162393	0	0	0	0.180209
TCTCAGAAACATCGGCAAATGGC	23H-RNA	F43E2.6		0	0	0	0	4.64794	0	0	0		0	0	0	0	0	0	0	0
TCTCGCCGTCCATCGACTTTAA	23H-RNA	PALTTAA1		0	0	0	0	0	0	0	0		0	0	0	0	0	0	0	0
TCTCGCCGTCCATCGACTTTAAA	23H-RNA	PALTTAA1		0	0	0	0	0	0	0	0		0	0	0	0	0	0	0	0
TCTCGCCGTCCATGGACTTTAAA	23H-RNA	other		0	0	0	0	0	0	0	0		0	0	0	0	0	0	0	0
TCTCGTAGAACGTGTCGCTTCG	23H-RNA	F55A4.9, rncs-1		0	0	0	0	0	0	0.379373	0		0	0	0.19354	0	0	0	0	0
TCTCGTAGAACGTGTCGCTTCGT	23H-RNA	F55A4.9, rncs-1		0	0	0	0	0	0	0	0		0	0	0	0.162393	0	0	0	0
TCTCGTTCCAATTCAACTCCAGA	23H-RNA	T05E12.10		0	0	0	0	0	0	0	0		0	0	0	0.162393	0	0	0	0
TCTCTCGATGCTCGTCGATCCAG	23H-RNA	F55A4.9, rncs-1		0	0	0.215091	0	4.64794	7.23544	0	0		0	0	0	0.324785	4.77791	0	0	0
TCTCTCGTAGAACGTGTCGCTTC	23H-RNA	F55A4.9, rncs-1		0	0	0	0	9.29587	7.23544	0	0		0	0	0	0	0	0	0	0
TCTCTCGTAGAACGTGTCGCTTCG	23H-RNA	F55A4.9, rncs-1		0	0	0	0	9.29587	7.23544	0	0		0	0	0	0	0	0	0	0
TCTCTCTTCTCGGCTCTTCGAGC	23H-RNA	ChrIII_hairpin1		0	0	0	0.179138	4.64794	7.23544	0	0		0	0	0	0.162393	0	5.18806	0	0
TCTCTTCAGCTGACTACACTCT	23H-RNA	rft-2, Y47D7A.14_IR, Y47D7A.14_IR_element		0	0	0	0	4.64794	0	0	0		0	0	0	0	0	0	0	0
TCTGAGATGTCTTCACAATTCTC	23H-RNA	F43E2.6		0	0	0	0	0	0	0.189687	0		0	0	0	0	0	0	0	0
TCTGCAACTGCCGCACGGTTTT	23H-RNA	DNA-8-1		0	0	0	0	0	0	0	0		0	0	0	0	0	0	0	0
TCTGTACGTCCATTTGGCAATA	23H-RNA	Y105C5A.14		0	0	0.215091	0	18.5917	0	0	0.212223		0	0	0.19354	0	9.55582	0	0	0
TCTGTCACTCTCTAACTATCTAC	23H-RNA	Unknown_RE2		0	0	0	0	0	0	0	0		0	0	0	0	0	0	0	0
TCTTACTGTAGTTTTCGCTAAG	23H-RNA	PALTA4		0	0	0	0	0	0	0	0		3.85773	0	0	0	0	0	0	0
TCTTAGAACCCATATATACCCCC	23H-RNA	Y116F11A.1		0	0	0	0.537413	0	0	0.189687	0		0	0	0.19354	0	0	0	0	0
TCTTAGAACCCATATATACCCCCT	23H-RNA	Y116F11A.1		0	0	0	0	4.64794	0	0	0		0	0	0	0.162393	0	0	0	0
TCTTCCACGCCATCATCCACATC	23H-RNA	Y57G11C.1145_hairpin		0	0	0	0	0	14.4709	0.189687	0		0	0	0.38708	0	4.77791	0	0	0
TCTTCCTGATGTTCTGATCCTTC	23H-RNA	Unknown_IR1		0	0	0	0	0	0	0	0		0	0	0	0	0	0	0.222818	0
TCTTCTCGGCTCTTCGAGCGCGT	23H-RNA	ChrIII_hairpin1		0	0	0	0	0	0	0	0		0	0	0	0	0	0	0	0
TCTTCTCGGCTCTTCGAGCGCGTC	23H-RNA	ChrIII_hairpin1		0	0	0	0	0	0	0.189687	0		0	0	0	0	0	0	0	0
TCTTGCTTCTGTTCCAAATATG	23H-RNA	F19B2.5		0	0	0	0.179138	0	0	0	0		0	0	0	0.162393	0	0	0	0
TCTTGCTTCTGTTCCAAATATGC	23H-RNA	F19B2.5		0	0	0	0	0	0	0	0		0	0	0	0	4.77791	10.3761	0	0.180209
TGAAAGAGAGAGCAGAACAGCG	23H-RNA	F55A4.9, rncs-1		0	0	0.430181	0	0	0	0	0		0	0	0	0	0	0	0	0
TGAAAGGATCGGGACGATTAGGA	23H-RNA	ChrX_intergenic1		0	0	0	0	0	0	0	0		0	0	0	0	0	0	0	0
TGAAATCGTGGGAGGGGCTTAAA	23H-RNA	Unknown_RE7		0	0	0	0	0	0	0	0		0	0	0	0	0	0	0	0
TGAAATCGTGGGCGGGGCTTAAA	23H-RNA	mir-5550_RE		0	0	0	0	4.64794	7.23544	0	0		0	0	0	0	0	0	0	0
TGAAGACATCTCAGAAACATC	23H-RNA	F43E2.6		0	0	1.29054	1.07483	0	0	0.189687	0.636668		0	0	0.58062	0.64957	0	0	1.33691	0.720835
TGAAGACATCTCAGAAACATCG	23H-RNA	F43E2.6		0	0	0.215091	0	4.64794	0	0.189687	0.212223		0	0	0.19354	0	0	0	0	0.180209
TGAAGACATCTCAGAAACATCGG	23H-RNA	F43E2.6		0	0	0.215091	0.179138	9.29587	7.23544	0.948434	0.212223		0	0	0	0	0	0	0.222818	0.360417
TGAAGACATCTCAGAAACATCGGC	23H-RNA	F43E2.6		0	0	0	0	0	0	0	0		0	0	0	0	0	0	0	0
TGAAGAGGCAGGGTCCGGTTG	23H-RNA	Y57G11C.1145_hairpin		0	9.19093	0.430181	0	4.64794	0	0.379373	0.212223		3.85773	0	0	0	0	10.3761	0	0
TGACATGGAGATTAGATAACA	23H-RNA	Y37E11B.2		0	0	0	0.179138	0	0	0	0		0	0	0	0	0	0	0	0
TGACGACGACGATGGCTGCGGC	23H-RNA	Y57G11C.1145_hairpin		0	0	0	0	9.29587	0	0	0		0	0	0	0	0	0	0	0
TGAGAACCCCAAATCTACGGACC	23H-RNA	TC5A		0	0	0	0	0	0	0	0		0	0	0	0	0	0	0	0
TGAGACATGGTATCGAGATATG	23H-RNA	Y37E11B.2		0	9.19093	0.430181	0	32.5356	14.4709	0.56906	0		0	0	0.19354	0.162393	0	5.18806	0.445636	0.180209
TGAGATGTCGGCGGCCTGATA	23H-RNA	PALTA3		0	0	0	0	0	0	0	0		0	0	0	0	0	0	0	0
TGAGGTGTTGGTGCTGATGGCA	23H-RNA	C36A4.14		0	4.59547	0	0	51.1273	57.8835	0.758747	0.636668		0	0	0	0	0	10.3761	0	0.360417
TGAGGTTTTCTGCAGTACACGC	23H-RNA	PALTA3		0	0	0	0	0	0	0	0		0	0	0	0	0	0	0	0
TGAGTGGCGAAAATCGGAAATT	23H-RNA	other		0	0	0	0	4.64794	0	0	0		0	0	0	0	0	0	0	0
TGATCTACAAAAAATGCGGGAAC	23H-RNA	CELE14B		0	0	0	0	0	0	0	0		0	0	0	0	0	0	0	0
TGATCTACAAAAAATGCGGGAAT	23H-RNA	CELE14B		0	0	0	0	0	0	0	0		0	0	0	0.162393	0	10.3761	0	0
TGATCTACAAAAAATGCGGGAATT	23H-RNA	CELE14B		0	0	0	0	0	0	0	0		0	0	0	0	0	0	0	0
TGATCTACCTGTTGAACTTGACC	23H-RNA	other		0	0	0	0	0	0	0	0.212223		0	0	0	0	0	0	0	0
TGATCTACCTGTTGAACTTGACT	23H-RNA	TIR54TA1		0	0	0	0	0	0	0	0		0	0	0	0	0	0	0	0
TGATCTCTCTTCTCGGCTCTTCG	23H-RNA	ChrIII_hairpin1		0	0	0	0	4.64794	7.23544	0	0		0	0	0	0	0	0	0	0
TGATGCGGTTGTTCCAAAGAATCC	23H-RNA	F55A4.9, rncs-1		0	0	0	0	0	7.23544	0	0		0	5.20251	0	0	0	5.18806	0.222818	0
TGATGGCGTGGAAGAAGTTGA	23H-RNA	Y57G11C.1145_hairpin		0	0	0.215091	0	4.64794	0	0	0		0	5.20251	0	0	0	0	0	0
TGATGGCGTGGAAGAAGTTGATG	23H-RNA	Y57G11C.1145_hairpin		0	0	0	0	0	7.23544	0	0		0	0	0	0	0	0	0	0
TGATGTGGATGATGGCGTGGAAG	23H-RNA	Y57G11C.1145_hairpin		0	0	0	0	0	0	0	0		0	0	0	0	0	0	0	0
TGCAAATGAAATCGTGGGAGGGG	23H-RNA	Unknown_RE7		0	0	0	0	0	0	0	0		0	0	0	0	0	0	0	0
TGCAAATGAAATCGTGGGCGGG	23H-RNA	mir-5550_RE		0	0	0	0	0	0	0	0		0	0	0	0	0	0	0	0
TGCAACTAAGACACCCCGAACT	23H-RNA	Y37E3.30		0	0	0	0	0	0	0	0		0	0	0	0	0	0	0	0
TGCACAGACTGAGCATTTTCCCCC	23H-RNA	other		0	0	0	0	0	7.23544	0	0		0	0	0	0	0	0	0	0
TGCAGAGAGCCTAAGGAGCATC	23H-RNA	other		0	0	0.215091	0.179138	4.64794	0	0	0		0	0	0	0	0	0	0	0
TGCCGATGTTTCTGAGATGTCTTC	23H-RNA	F43E2.6		0	0	0.215091	0.71655	55.7752	50.6481	1.51749	1.91		0	0	0.9677	0.487178	0	0	1.33691	1.08125
TGCCTCTTCATCAACTTCTTCC	23H-RNA	Y57G11C.1145_hairpin		0	0	0	0	0	0	0	0		0	0	0	0	0	0	0	0
TGCGACGGATCAGTGTTGCCACT	23H-RNA	T05E12.8		0	4.59547	0	0	23.2397	7.23544	0.189687	0		0	0	0	0	4.77791	10.3761	0	0
TGCGGAGAAATGACGAGAAAT	23H-RNA	other		0	0	0	0	0	0	0	0		0	0	0	0	0	0	0	0
TGCGGCGAGGATGATGTGGATG	23H-RNA	Y57G11C.1145_hairpin		0	0	0	0	0	0	0	0		0	0	0	0	0	0	0	0
TGCGGCGAGGATGATGTGGATGA	23H-RNA	Y57G11C.1145_hairpin		0	0	0	0	0	0	0	0		0	0	0	0	0	0	0	0
TGCGTCTCTCCCCCTCCCACACT	23H-RNA	other		0	0	0	0	0	0	0	0		0	0	0	0	0	0	0	0
TGCTCGTCGATCCAGTTTGGCC	23H-RNA	F55A4.9, rncs-1		0	0	0	0	0	0	0	0.212223		0	0	0.19354	0	0	0	0	0
TGCTCGTCGATCCAGTTTGGCCA	23H-RNA	F55A4.9, rncs-1		0	0	0	0	4.64794	7.23544	0	0		0	0	0	0	0	0	0	0
TGCTTTCCTCATCTCTGATCT	23H-RNA	F55A4.9, rncs-1		0	0	0	0	0	0	0	0		0	0	0	0	0	0	0	0
TGCTTTCCTCATCTCTGATCTT	23H-RNA	F55A4.9, rncs-1		0	0	0	0	0	0	0.189687	0		3.85773	0	0	0.162393	0	10.3761	0	0
TGCTTTCCTCATCTCTGATCTTTT	23H-RNA	F55A4.9, rncs-1		0	0	0	0	13.9438	7.23544	0	0.424445		0	0	0	0	0	0	0	0
TGGAAATATGACGGCTGCTACGA	23H-RNA	F53H1.4		0	0	0	0	0	0	0	0		0	0	0	0	0	0	0	0
TGGACCATCCGCAACAGTGATA	23H-RNA	F57G8.14, F57G8.15, linc-59		0	0	0	0	4.64794	0	0	0		0	0	0	0	0	0	0	0
TGGACTTTTTCGCTGGTTTGGTG	23H-RNA	F55A4.9, rncs-1		0	0	0.430181	0.179138	4.64794	0	0	0		0	5.20251	0	0	0	0	0	0
TGGAGACCCTCACCTACCTGCG	23H-RNA	other, Y116A8B.1		0	0	0	0	0	0	0	0		0	0	0	0	0	0	0	0
TGGAGTTGAATTGGAACGAGATC	23H-RNA	T05E12.10		0	0	0	0	0	0	0	0		0	0	0	0	0	0	0	0
TGGATAAGATGATGAAACTAGTC	23H-RNA	F55A4.9, rncs-1		0	0	0	0	4.64794	0	0	0.424445		0	0	0	0	0	0	0	0
TGGATGATGGCGTGGAAGAAG	23H-RNA	Y57G11C.1145_hairpin		0	0	0	0	0	14.4709	0	0		0	0	0	0	0	0	0	0
TGGATGATGGCGTGGAAGAAGT	23H-RNA	Y57G11C.1145_hairpin		0	9.19093	0.215091	0.358275	18.5917	21.7063	0	0.212223		0	0	0	0	0	20.7522	0.222818	0.540626
TGGATGATGGCGTGGAAGAAGTT	23H-RNA	Y57G11C.1145_hairpin		0	0	0.645272	0.537413	41.8314	7.23544	0.189687	0.636668		0	0	0.38708	0.162393	14.3337	25.9403	0.222818	0.180209
TGGATGATGGCGTGGAAGAAGTTG	23H-RNA	Y57G11C.1145_hairpin		0	0	0.215091	1.07483	0	7.23544	0	0		3.85773	0	0	0	0	5.18806	0.222818	0.540626
TGGCCAAACTGGATTGACGAG	23H-RNA	F55A4.9, rncs-1		0	0	0.215091	0	0	0	0	0		0	0	0	0	0	0	0	0
TGGCCAAACTGGATTGACGAGC	23H-RNA	F55A4.9, rncs-1		0	0	0	0	0	0	0	0		0	0	0	0	0	0	0	0
TGGCCAAGCGGACTGGAGCACA	23H-RNA	F55A4.9, rncs-1		0	0	0	0	0	0	0	0		0	0	0	0	0	0	0	0
TGGCGTGTACTGCAGAAAACCC	23H-RNA	Y105C5A.15		0	0	0	0	0	0	0	0		0	0	0	0	0	0	0	0
TGGCGTGTACTGCAGAAAACCT	23H-RNA	PALTA3		0	0	0.215091	0	0	0	0	0		0	0	0	0	0	0	0	0
TGGCTGCGGCGAGGATGATGTG	23H-RNA	Y57G11C.1145_hairpin		0	0	0	0	0	0	0	0		0	0	0	0	0	0	0	0
TGGGAATGCAGAAGAAAAGAGGG	23H-RNA	other		0	0	0	0	0	0	0	0		0	0	0	0	0	0	0	0
TGGGCGGGGCCAATCCGGAATGC	23H-RNA	Y24F12A.3, Y24F12A.4		0	0	0	0	0	0	0	0		0	0	0	0.162393	0	0	0	0
TGGTCTTTGAGTTTCCGATTTCG	23H-RNA	Y17D7C.3		0	0	0.215091	0	0	0	0	0		0	10.405	0	0.162393	0	0	0	0
TGGTGGAGCTGGACGATGGATT	23H-RNA	F55A4.9, rncs-1		0	0	0	0	0	0	0	0		0	0	0	0	0	0	0	0
TGGTTAGGATTCGTGGTTTTCA	23H-RNA	tRNA		0	0	0.430181	0	0	0	0	0		0	0	0	0.162393	0	0	0	0
TGTAATTCTGCAGCCACTTCCGA	23H-RNA	W03D2.15		0	0	0	0	0	7.23544	0	0		0	0	0	0	0	0	0	0
TGTAGATCAAACCGTCATGGG	23H-RNA	CELE14B		0	0	0	0	0	0	0	0		0	0	0	0	0	0	0	0
TGTAGATCACACCGTGATGGGAC	23H-RNA	CELE14B		0	0	0	0	0	0	0	0		0	0	0	0	0	0	0	0
TGTAGTTTGTAGTCTAGCAGACC	23H-RNA	TGTAGTTTGTAGTCTAGCAGACC_repeat		0	0	0	0	0	0	0	0		0	0	0	0	0	0	0	0
TGTCTTCCTTTTGTTTCTCTTCC	23H-RNA	F19B2.5		0	0	0	0	0	0	0	0		0	0	0	0	0	0	0	0
TGTGAACAGCGAGACACTATTCC	23H-RNA	Y71A12B.2, Y71A12B.3		0	0	0	0	0	0	0	0		0	0	0	0	0	0	0	0
TGTGAAGACATCTCAGAAACAT	23H-RNA	F43E2.6		0	0	0	0	0	0	0	0		0	0	0	0	0	0	0	0
TGTGAAGACATCTCAGAAACATC	23H-RNA	F43E2.6		0	0	0	0	0	0	0.189687	0.212223		0	0	0	0.162393	0	0	0.222818	0.180209
TGTGAAGACATCTCAGAAACATCG	23H-RNA	F43E2.6		0	0	0	0	0	0	0	0		0	0	0	0	0	0	0	0
TGTGATTTTGGATTAAACTCA	23H-RNA	Y59H11AR.6		0	0	0.215091	0.71655	0	0	0.379373	0.424445		0	0	0	0.324785	0	0	0	0.360417
TGTGCTGAGCTCTTGGATGATC	23H-RNA	puf-10, Y48G1BL.3		0	0	0	0	0	0	0	0		0	0	0	0	0	0	0	0
TGTGGATGATGGCGTGGAAGA	23H-RNA	Y57G11C.1145_hairpin		0	0	0	0	0	7.23544	0	0		0	0	0	0	0	0	0	0.180209
TGTGGATGATGGCGTGGAAGAA	23H-RNA	Y57G11C.1145_hairpin		0	0	0	0	0	0	0	0		0	0	0	0	0	0	0	0
TGTGGATGATGGCGTGGAAGAAG	23H-RNA	Y57G11C.1145_hairpin		0	0	0	0	0	0	0	0		0	0	0	0	0	0	0	0
TGTGGCCCGCGGTAATTACATCC	23H-RNA	F41F3.10		0	0	0	0	0	0	0	0		0	0	0	0	0	0	0	0
TGTGGGCCCTCGCACTGTCTACC	23H-RNA	E01G4.5		0	0	0	0	0	0	0	0		0	0	0	0	0	0	0	0
TGTGGGCGGGGCCAATCCGGAA	23H-RNA	H15N14.4, H37A05.4, Y24F12A.3, Y24F12A.4		0	0	0	0	0	0	0	0		0	0	0	0	0	0	0	0
TGTGGGCGGGGCCAATCCGGAAT	23H-RNA	H15N14.4, Y24F12A.3, Y24F12A.4		0	0	0	0	9.29587	0	0	0		0	0	0	0	0	0	0	0
TGTGTTCGTCCTCCATACATTG	23H-RNA	C36A4.14		0	0	0	0	0	0	0	0		0	0	0	0	0	0	0	0.180209
TGTTCCCTGTGGAGACCCTCACC	23H-RNA	other, Y116A8B.1		0	0	0.430181	0	18.5917	21.7063	0.189687	0		0	0	0.19354	0	0	0	0.222818	0.360417
TGTTCTGCTCTCTCTTTCAGC	23H-RNA	F55A4.9, rncs-1		0	0	0.215091	0	0	0	0.189687	0		0	0	0	0	0	0	0	0
TGTTCTGCTCTCTCTTTCAGCT	23H-RNA	F55A4.9, rncs-1		0	0	0	0	0	0	0.379373	0		0	0	0	0	0	0	0	0.180209
TGTTTCTGAGATGTCTTCACA	23H-RNA	F43E2.6		0	0	0	0	0	0	0	0		0	0	0	0.162393	4.77791	0	0.222818	0.180209
TGTTTTACACCGGATTGCCAGT	23H-RNA	Y116F11A.1		0	0	0	0	0	0	0	0		0	0	0	0	0	0	0	0
TTAAACACAGCGGCGCGCGGAAC	23H-RNA	other		0	0	0	0	0	0	0	0		0	0	0	0	0	0	0	0
TTAAACATAGCGGCGCGCGGA	23H-RNA	PALTA3		0	0	0	0	0	0	0	0		0	0	0	0	0	0	0	0.180209
TTAAACATAGCGGCGCGCGGAA	23H-RNA	PALTA3		0	0	0	0	4.64794	7.23544	0	0		0	0	0	0	0	0	0	0
TTAAACATAGCGGCGCGCGGAAC	23H-RNA	PALTA3		0	0	0.430181	0.537413	23.2397	28.9417	0.189687	0.212223		0	5.20251	0.19354	0	23.8895	20.7522	0	0.360417
TTAAAGTTGATGGACGGCGAGATT	23H-RNA	PALTTAA1		0	0	0	0	0	0	0	0		0	0	0	0	0	0	0	0
TTACAGTACTCCTGAAAGGCACA	23H-RNA	B0303.7		0	0	0.860363	0	0	0	0	0		0	0	0	0	0	0	0	0
TTACCTATCGGCTTTAAATGT	23H-RNA	PALTTAA3		0	0	0	0.179138	0	0	0	0		3.85773	20.81	0	0	23.8895	10.3761	0	0
TTAGAGAGTGACAGACATCCGGG	23H-RNA	Unknown_RE2		0	0	0	0	0	0	0	0		0	0	0	0	0	0	0	0
TTAGATACCGTACCCCGAAAAC	23H-RNA	ChrIII_hairpin2		0	0	0	0	0	0	0	0		0	0	0	0	0	0	0	0
TTAGATACCGTACCCCGAAAACT	23H-RNA	ChrIII_hairpin2		0	0	0	0	9.29587	0	0	0		0	0	0	0	4.77791	0	0	0
TTAGGATTCGTGGTTTTCACCC	23H-RNA	tRNA		0	0	0.430181	0	4.64794	7.23544	0.379373	0.212223		0	0	0.58062	0	0	10.3761	0	0
TTAGGTTTTCTGCAGTACACGC	23H-RNA	PALTA3		0	0	0	0	0	0	0	0		0	0	0	0	0	0	0	0
TTATCATTGCCCGTCGCCTTTA	23H-RNA	C02B8.2, F31A9.4, fbxc-37, fbxc-38		0	4.59547	0	0	13.9438	0	0.379373	0.424445		3.85773	5.20251	0	0	0	25.9403	0.222818	0
TTATCTAATCTCCATGTCACCC	23H-RNA	Y37E11B.2		0	0	0	0	0	0	0	0		0	0	0	0	0	0	0	0
TTCAAACATTCGGCAATGGGGTA	23H-RNA	Y37E3.30		0	0	0	0	0	0	0	0		0	0	0	0	0	0	0	0
TTCACGGCGGCCGACAATTTCC	23H-RNA	other		0	0	0	0	0	0	0	0		0	5.20251	0	0	9.55582	0	0	0
TTCATTCACATCGGCTGCCATCC	23H-RNA	T05E12.8		0	0	0	0	0	0	0.379373	0		3.85773	0	0	0	0	0	0	0
TTCATTCTGCCCTCGCACACACC	23H-RNA	T25G12.8		0	0	0	0.358275	0	0	0	0		0	0	0	0	0	0	0	0
TTCCACGCCATCATCCACATC	23H-RNA	Y57G11C.1145_hairpin		0	0	0	0	0	7.23544	0	0		0	0	0	0	0	0	0	0
TTCCACGGCGGCCGACAATTTCC	23H-RNA	Unknown_hairpin_RE2		0	0	0	0	0	0	0	0		0	0	0	0	0	0	0	0
TTCCCGCATTTTTTGTAGATC	23H-RNA	CELE14B		0	9.19093	0	0	23.2397	14.4709	0	0		11.5732	10.405	0	0	0	10.3761	0.222818	0.360417
TTCCCTTTATGTCGCACTTGCG	23H-RNA	T05E12.10		0	0	0	0	0	0	0	0		0	0	0	0	0	0	0	0
TTCCCTTTATGTCGCACTTGCGC	23H-RNA	T05E12.10		0	0	0	0	0	7.23544	0	0		0	0	0.19354	0	0	0	0	0
TTCCGCGCGCCGCTATGTTTA	23H-RNA	PALTA3		0	0	0	0	0	0	0	0		0	0	0	0	0	0	0	0
TTCCGCGCGCCGCTATGTTTAAC	23H-RNA	PALTA3		0	0	0	0	13.9438	7.23544	0	0		0	0	0	0	0	0	0	0
TTCCGCGCGCCGCTATGTTTAACT	23H-RNA	PALTA3		0	0	0	0	0	0	0	0		0	0	0	0	0	0	0	0
TTCCTCATCTCTGATCTTTTCC	23H-RNA	F55A4.9, rncs-1		0	0	0	0	4.64794	0	0	0		0	0	0.19354	0	0	5.18806	0	0.180209
TTCCTCATCTCTGATCTTTTCCA	23H-RNA	F55A4.9, rncs-1		0	0	0	0	0	0	0	0		3.85773	0	0	0	0	0	0	0
TTCCTCGTTTGGATATGTAGAAGA	23H-RNA	Y17D7C.3		0	4.59547	0.860363	0	0	0	0.189687	0		0	5.20251	0.19354	0	4.77791	5.18806	0.222818	0
TTCGAGACTCGTCAGATCTGC	23H-RNA	K02E2.6		0	0	0.430181	0.179138	0	0	0	0		0	0	0	0	0	0	0	0.180209
TTCGAGACTCGTCAGATCTGCA	23H-RNA	K02E2.6		0	0	0.215091	0	0	0	0	0		0	0	0.19354	0.162393	0	0	0	0.180209
TTCGAGACTCGTCAGATCTGCAT	23H-RNA	K02E2.6		0	0	0	0	0	0	0	0		0	0	0	0	0	0	0	0
TTCGCGTAGATCACATGTAGATC	23H-RNA	pcp-4, Unknown_RE8, Y116F11B.3, Y15E3A.3, Y6B3B.7, Y6B3B.9		0	0	0	0	9.29587	0	0	0		0	5.20251	0.19354	0	9.55582	0	0	0.180209
TTCGCTCTCGATTCCGCATGCCG	23H-RNA	dnj-27_element		0	0	0	0	0	0	0	0		0	0	0	0	0	0	0	0
TTCGCTCTCGATTTCGCATGCCG	23H-RNA	dnj-27_element		0	0	0	0	4.64794	0	0	0		0	5.20251	0	0.324785	0	5.18806	0	0
TTCGGACAGATGTGACACGGA	23H-RNA	PALTTAA3		0	0	0	0	0	0	0	0		0	0	0	0	0	0	0	0
TTCGGCAATGGGGTACCCTACG	23H-RNA	Y37E3.30		0	0	0	0	0	0	0	0		0	0	0	0	0	0	0	0
TTCTAAGTCCCTTTGATGCTC	23H-RNA	K06B9.6		0	0	0	0	0	0	0	0		0	0	0	0	0	0	0	0
TTCTACAAAAGGGACGCCGGAAA	23H-RNA	mtd-1, other, ZK337.5		0	0	0	0	0	0	0	0		0	0	0	0	0	0	0	0
TTCTACAGAAGGGACGCCGGAAA	23H-RNA	other		0	0	0	0	0	0	0	0		0	0	0	0	0	0	0	0
TTCTACATATCCAAACGAGGAAC	23H-RNA	Y17D7C.3		0	0	0	0	4.64794	0	0	0		0	0	0	0	0	0	0	0
TTCTACATATCCAAACGAGGAACC	23H-RNA	Y17D7C.3		0	0	0	0	0	0	0	0		0	0	0	0	0	0	0	0
TTCTCTCGTAGAACGTGTCGCT	23H-RNA	F55A4.9, rncs-1		0	0	0	0.179138	4.64794	0	0	0.212223		0	0	0	0	0	0	0	0.180209
TTCTCTCGTAGAACGTGTCGCTT	23H-RNA	F55A4.9, rncs-1		0	0	0.215091	0	4.64794	7.23544	0.189687	0		0	0	0	0	0	0	0	0
TTCTGGAATGAAACGAGTGCTGC	23H-RNA	Y116A8B.1		0	0	1.29054	0.537413	0	7.23544	0.948434	1.91		0	0	0.77416	0.64957	0	0	0	0
TTCTGTCATCACCCGCGGGGC	23H-RNA	dnj-27_element		0	0	0	0	0	0	0	0		0	0	0	0	0	0	0	0
TTCTTACTGTAGTCTTCGCTAAG	23H-RNA	fbxa-16, other, Y73B3A.14		0	0	0	0	0	21.7063	0.189687	0		0	0	0	0	0	5.18806	0	0
TTCTTACTGTAGTTTTCGCTAAG	23H-RNA	PALTA4		0	0	0	0	32.5356	7.23544	0	0		0	0	0	0	0	0	0	0
TTGAAGAATTTGAGTGAGGCTGA	23H-RNA	M4.2, puf-4		0	0	0	0	0	0	0	0		0	0	0	0	0	0	0	0
TTGATCTCTATGCGACCCCACA	23H-RNA	T05E12.10		0	4.59547	0	0	18.5917	0	0.189687	0.212223		3.85773	10.405	0	0.487178	23.8895	0	0.222818	0.180209
TTGATTGTGTCGGAAAAAGAAA	23H-RNA	K02E2.6		0	0	0	0	0	0	0	0		0	0	0	0	4.77791	0	0	0.180209
TTGCCTCTGAATGCCGAGTAGG	23H-RNA	other		0	0	0	0	4.64794	14.4709	0	0		3.85773	0	0	0	0	0	0	0.180209
TTGCCTCTGAATGCCGAGTAGGC	23H-RNA	gopc-1, other, ZK849.2		0	0	0	0	0	0	0	0		0	0	0	0.324785	0	0	0	0
TTGCTTAACTTGCCAGATCGGAC	23H-RNA	rrn-4_RE		0	0	0	0	0	0	0	0		0	0	0	0	0	0	0	0
TTGCTTTCCTCATCTCTGATCT	23H-RNA	F55A4.9, rncs-1		0	0	0	0	0	0	0	0		0	0	0	0	0	0	0	0
TTGCTTTCCTCATCTCTGATCTT	23H-RNA	F55A4.9, rncs-1		0	0	0.430181	0	0	0	0.379373	0		0	0	0	0	0	0	0	0
TTGCTTTCCTCATCTCTGATCTTT	23H-RNA	F55A4.9, rncs-1		0	0	0	0	13.9438	7.23544	0	0		0	0	0	0	4.77791	0	0	0
TTGGAATCCGCTTAACAATTGG	23H-RNA	Y105C5A.1272, Y105C5A.14		0	0	0.215091	0	0	0	0	0		0	0	0	0	0	10.3761	0.222818	0
TTGGACTTTTTCGCTGGTTTGGT	23H-RNA	F55A4.9, rncs-1		0	0	0	0	0	0	0	0		0	0	0	0	0	0	0	0
TTGGCCAAACTGGATTGACGAGC	23H-RNA	F55A4.9, rncs-1		0	0	0	0.179138	9.29587	7.23544	0	0		0	0	0	0	0	5.18806	0	0.180209
TTGGCCAAGCGGACTGGAGCACA	23H-RNA	F55A4.9, rncs-1		0	9.19093	0	0	9.29587	0	0	0		0	0	0	0	0	0	0.222818	0
TTGGTGGGCCCTAGACGATTTTG	23H-RNA	MTCE.11, nduo-1		0	0	0	0	0	0	0	0		0	0	0	0	0	0	0	0
TTGGTTGGTCCCCGAATTTTGCC	23H-RNA	PALTA3		0	0	0	0	0	7.23544	0	0		0	0	0	0	0	0	0	0.360417
TTGTCTTCCTTTTGTTTCTCTTC	23H-RNA	F19B2.5		0	0	0	0	0	0	0	0		0	0	0	0	0	0	0	0.180209
TTGTGAAGACATCTCAGAAACA	23H-RNA	F43E2.6		0	9.19093	0	0.179138	13.9438	7.23544	0.379373	0.636668		0	5.20251	0	0	4.77791	10.3761	0.222818	0.720835
TTGTGTTCGTCCTCCATACATTG	23H-RNA	C36A4.14		0	0	0	0	0	0	0.189687	0		0	0	0	0	0	0	0	0
TTTAAAGTCGTAGAAGTGGGAAA	23H-RNA	NPALTA1		0	0	0	0	0	0	0	0		0	0	0	0	0	0	0	0
TTTCAACACGGCGGGAGGAAAGC	23H-RNA	Y37E3.30		0	0	0	0	0	0	0	0		0	0	0	0	0	0	0	0
TTTCACGGCGGCCGACAATTTCC	23H-RNA	other		0	0	0	0	0	0	0	0		0	0	0	0	0	0	0	0
TTTCCAATGTGCTCCAGTCCGCT	23H-RNA	F55A4.9, rncs-1		0	0	0	0	0	0	0	0		0	0	0	0	0	0	0	0
TTTCCTCATCTCTGATCTTTTC	23H-RNA	F55A4.9, rncs-1		0	0	0	0	0	0	0	0		0	0	0	0.162393	0	0	0	0.180209
TTTCCTCATCTCTGATCTTTTCC	23H-RNA	F55A4.9, rncs-1		0	4.59547	0	0	9.29587	0	0	0		0	5.20251	0	0	14.3337	0	0	0.180209
TTTCCTCATCTCTGATCTTTTCCA	23H-RNA	F55A4.9, rncs-1		0	0	0	0	0	7.23544	0.379373	0		0	0	0	0	0	0	0	0
TTTCGAAACCGTGCGGCAGTTG	23H-RNA	DNA-8-1		0	0	0	0	0	0	0	0		0	0	0	0	0	0	0	0
TTTCGAAACCGTGCGGCAGTTGC	23H-RNA	DNA-8-1		0	0	0	0	9.29587	7.23544	0.189687	0		0	0	0.19354	0	0	0	0	0
TTTCGGACAGATGTGACACGGA	23H-RNA	other		0	0	0	0	0	0	0	0		0	0	0	0	0	0	0	0
TTTCGGGGTACGGTATCTAAT	23H-RNA	ChrIII_hairpin2		0	4.59547	0	0	0	0	0	0		0	0	0	0	0	0	0	0.180209
TTTCGGGGTACGGTATCTAATA	23H-RNA	ChrIII_hairpin2		0	0	0	0	0	0	0	0		0	0	0	0	0	0	0	0
TTTCGGGGTACGGTATCTAATAG	23H-RNA	ChrIII_hairpin2		0	0	0	0	9.29587	7.23544	0	0		0	0	0	0	0	0	0.222818	0
TTTCGTCCATACATTGAGGGAGC	23H-RNA	F39E9.10		0	0	0	0	0	0	0	0		0	0	0	0	0	0	0	0
TTTCGTCCATACATTGAGGGAGCC	23H-RNA	F39E9.10		0	0	0	0	0	0	0	0		0	0	0	0	0	0	0	0
TTTCGTTCTTGGTGAAAAAAGTG	23H-RNA	E01G4.7		0	0	0	0	4.64794	0	0.189687	0		0	0	0	0	0	0	0	0
TTTCTCTTCCTCTTGCTTCTGT	23H-RNA	F19B2.5		0	0	0	0	0	0	0.189687	0		0	0	0	0	0	0	0	0
TTTCTCTTCCTCTTGCTTCTGTT	23H-RNA	F19B2.5		0	0	0	0	0	0	0	0		0	0	0	0	0	0	0.222818	0
TTTCTGAGATGTCTTCACAAT	23H-RNA	F43E2.6		0	0	0	0	0	0	0	0		0	0	0	0	0	0	0	0
TTTCTGAGATGTCTTCACAATT	23H-RNA	F43E2.6		0	4.59547	0.430181	0.71655	13.9438	14.4709	0.758747	0.84889		7.71546	0	0	0	14.3337	10.3761	0.222818	0.180209
TTTCTGAGATGTCTTCACAATTC	23H-RNA	F43E2.6		0	18.3819	0.645272	0.71655	65.0711	14.4709	2.27624	1.69778		7.71546	15.6075	0.58062	0.487178	28.6674	15.5642	0.668454	1.08125
TTTCTGCAGTACACGCCACGC	23H-RNA	PALTA3		0	0	0	0	0	0	0	0		0	0	0	0	0	0	0	0
TTTCTGTCATCACCCGCGGGGC	23H-RNA	dnj-27_element		0	0	0.215091	0	0	0	0	0		0	0	0	0	0	0	0	0
TTTCTGTCATCACCCGCGGGGCT	23H-RNA	other		0	4.59547	0	0	0	0	0	0		3.85773	0	0	0	0	0	0.445636	0
TTTGATACCTGGACTCTTTCC	23H-RNA	E01G4.7		0	0	0	0	0	0	0	0		0	0	0	0	0	0	0	0
TTTGATCTACAAAAAATGCGGG	23H-RNA	CELE14B		0	0	0	0	4.64794	0	0	0		7.71546	5.20251	0	0	0	5.18806	0	0.180209
TTTGATCTACCTGTTGAACTTG	23H-RNA	TIR54TA1		0	4.59547	0	0	9.29587	0	0	0		0	0	0	0	0	0	0	0
TTTGATCTACCTGTTGAACTTGA	23H-RNA	other		0	0	0	0	0	0	0	0		0	0	0	0	0	0	0	0
TTTGATCTACGAAAAATGCGGGA	23H-RNA	CELE14B		0	0	0	0.179138	0	0	0	0		0	0	0	0	0	0	0	0
TTTGGAACAGAAGCAAGAGGA	23H-RNA	F19B2.5		0	0	0	0	0	0	0	0		0	0	0	0	0	0	0	0
TTTGGCAGCCCCCGACACTTTCG	23H-RNA	F39D8.3		0	0	0	0	0	0	0	0		0	0	0	0	0	0	0	0
TTTGGCCAAGCGGACTGGAGC	23H-RNA	F55A4.9, rncs-1		0	0	0.215091	0	0	0	0	0		0	0	0	0	0	0	0.222818	0.180209
TTTGGCCAAGCGGACTGGAGCA	23H-RNA	F55A4.9, rncs-1		0	0	0	0	0	0	0	0		0	0	0	0	0	0	0	0.180209
TTTGGCCAAGCGGACTGGAGCACA	23H-RNA	F55A4.9, rncs-1		0	0	0	0	0	0	0.379373	0		0	0	0	0	0	0	0	0
TTTGGGGGGCAGAAATCGGAAA	23H-RNA	PAL8C		0	0	0	0	0	0	0	0		0	0	0	0	0	0	0	0
TTTGTTTCTCTTCCTCTTGCTTC	23H-RNA	F19B2.5		0	0	0	0	0	0	0	0		0	0	0	0	0	0	0	0
TTTTAAAACCGTGCGGCAGTTGC	23H-RNA	DNA-8-1		0	0	0	0	0	0	0	0		0	0	0	0	0	0	0	0
TTTTCGGGGTACGGTATCTAATA	23H-RNA	ChrIII_hairpin2		0	0	0.215091	0	23.2397	14.4709	0	0		0	0	0	0	0	0	0	0
TTTTCTGCAGTACACGCCACGC	23H-RNA	PALTA3		0	0	0	0	0	0	0	0		0	5.20251	0.19354	0	0	0	0	0.360417
TTTTGAAAGTTCTACCGTTCTC	23H-RNA	F34D6.11, linc-12		0	0	0	0	0	0	0	0		0	0	0	0	0	0	0	0
TTTTGATCTACCTGTTGAACTTG	23H-RNA	TIR54TA1		0	0	0	0	0	0	0	0.212223		0	0	0	0	0	0	0	0
TTTTGCCTTTTCCCCGTGAGT	23H-RNA	PALTA3		0	0	0	0	0	0	0	0		0	0	0	0	0	0	0	0
TTTTGGACCGAGTTGCCGTGACT	23H-RNA	PALNN1		0	0	0	0.179138	0	21.7063	0	0		0	0	0	0	0	0	0	0
TTTTGGGGGGCAGAAATCGGA	23H-RNA	PAL8C		0	0	0	0	0	0	0	0		0	0	0	0.162393	0	0	0.222818	0.180209
TTTTGGGGGGCAGAAATCGGAA	23H-RNA	PAL8C		0	0	0	0	0	0	0	0		0	0	0.19354	0	0	0	0	0
TTTTGGGGGGCAGAAATCGGAAA	23H-RNA	PAL8C		0	0	0	0	0	0	0	0		0	0	0	0	0	0	0	0
TTTTGTTTCTCTTCCTCTTGCT	23H-RNA	F19B2.5		0	0	0	0	18.5917	0	0	0.212223		0	5.20251	0	0.487178	4.77791	5.18806	0.445636	0.180209
TTTTGTTTCTCTTCCTCTTGCTT	23H-RNA	F19B2.5		0	4.59547	0	0	0	7.23544	0	0.424445		0	0	0	0	0	0	0	0
TTTTGTTTCTCTTCCTCTTGCTTC	23H-RNA	F19B2.5		0	0	0	0	13.9438	0	0	0		0	0	0.19354	0	0	0	0	0.180209
TTTTTCAGCGGTCTCGTTATG	23H-RNA	PAL5A		0	0	0	0	0	0	0	0		0	0	0	0	0	0	0	0
TTTTTCAGCGGTCTCGTTATGA	23H-RNA	PAL5A		0	0	0	0	0	0	0	0		0	0	0	0	0	0	0	0
TTTTTGATTCAAAAACTCGGAT	23H-RNA	mdt-8, Y62F5A.1		0	0	0	0	4.64794	0	0	0		3.85773	0	0	0	9.55582	0	0	0
TTTTTTCTGTATTCTTATTTTTC	23H-RNA	F52G3.8		0	0	2.15091	2.14965	18.5917	14.4709	0.758747	1.69778		34.7196	46.8226	0.9677	0.64957	47.7791	36.3164	1.11409	0.540626
WBGene00045382	23H target 22G	T05E12.8		72.6613	64.3365	11.6149	11.8231	88.3108	137.473	14.4162	15.0678		38.5773	67.6326	9.48346	8.28202	28.6674	67.4448	8.24427	8.65002
WBGene00044258	23H target 22G	Y57G11C.51		61.4826	55.1456	22.7996	19.8843	65.0711	115.767	24.849	24.4056		30.8618	83.2402	19.1605	13.1538	57.3349	88.197	14.9288	15.3177
WBGene00045366	23H target 22G	Y17D7C.3		33.536	22.9773	11.6149	12.3605	46.4794	21.7063	16.3131	13.1578		34.7196	46.8226	21.6765	21.923	76.4465	77.8209	30.5261	26.4907
WBGene00235158	23H target 22G	Y37E3.30		33.536	18.3819	26.4562	24.1836	55.7752	79.5898	31.1086	31.6212		81.0123	62.4301	14.5155	15.7521	71.6686	51.8806	22.059	19.4625
WBGene00021375	23H target 22G	Y37E11B.2		27.9467	27.5728	14.8413	13.6145	65.0711	36.1772	16.8821	15.7045		11.5732	26.0126	11.9995	12.829	71.6686	20.7522	11.3637	16.5792
WBGene00045311	23H target 22G	Y57G11C.57		16.768	18.3819	5.80745	4.12016	55.7752	94.0607	4.74217	5.51779		7.71546	10.405	3.48372	2.43589	9.55582	10.3761	4.01073	2.70313
WBGene00304895	23H target 22G	F52G3.8		16.768	50.5501	15.0563	16.4807	13.9438	50.6481	16.8821	14.0067		30.8618	52.0251	13.1607	11.3675	47.7791	51.8806	13.3691	14.5969
WBGene00045410	23H target 22G	E01G4.7		13.9733	13.7864	8.60363	8.06119	37.1835	43.4126	8.91528	10.6111		15.4309	26.0126	6.38682	5.68374	57.3349	20.7522	6.90736	9.19064
WBGene00077787	23H target 22G	T05E12.10		13.9733	13.7864	8.60363	6.62809	32.5356	43.4126	8.72559	10.1867		15.4309	15.6075	7.93514	8.11963	28.6674	36.3164	8.46709	6.84793
WBGene00220185	23H target 22G	Y57G11C.1145		13.9733	18.3819	5.80745	4.65758	51.1273	86.8252	3.60405	3.39556		11.5732	5.20251	3.67726	2.2735	4.77791	5.18806	3.34227	2.52292
WBGene00271791	23H target 22G	W03D2.15		13.9733	13.7864	4.94709	4.2993	9.29587	28.9417	10.6225	4.88112		7.71546	20.81	4.06434	3.41024	14.3337	25.9403	6.90736	4.86563
WBGene00018199	23H target 22G	F39E9.7		11.1787	9.19093	6.66781	6.62809	4.64794	14.4709	9.48434	9.55001		15.4309	5.20251	4.06434	5.03417	38.2233	15.5642	8.46709	7.02814
WBGene00008447	23H target 22G	E01G4.5		5.58933	13.7864	7.31308	8.41947	13.9438	7.23544	11.3812	11.46		15.4309	10.405	5.61266	5.52135	9.55582	15.5642	7.353	7.38856
WBGene00010100	23H target 22G	F55C9.3		5.58933	0	2.366	2.32879	0	14.4709	2.46593	1.91		3.85773	0	0.9677	1.46153	14.3337	5.18806	2.89664	2.34271
WBGene00018394	23H target 22G	F43E2.6		5.58933	22.9773	2.79618	2.68706	65.0711	28.9417	1.32781	1.06111		11.5732	10.405	0.58062	0.487178	4.77791	10.3761	1.78254	1.08125
WBGene00077437	23H target 22G	Y59H11AR.6		5.58933	13.7864	4.5169	5.7324	4.64794	7.23544	5.12154	5.30556		11.5732	10.405	2.9031	1.78632	19.1116	10.3761	2.67382	3.60417
WBGene00185118	23H target 22G	K02E2.11		5.58933	9.19093	3.01127	2.68706	0	0	3.22467	2.12223		0	5.20251	2.32248	2.43589	4.77791	10.3761	4.01073	3.96459
WBGene00010507	23H target 22G	K02E2.6		2.79467	9.19093	4.5169	6.09068	9.29587	0	5.6906	5.09334		7.71546	5.20251	4.8385	3.57264	9.55582	0	4.902	5.22605
WBGene00013804	23H target 22G	Y116A8C.27		2.79467	0	0.430181	0.179138	0	0	0.189687	0.212223		0	0	0	0.162393	0	0	0	0.180209
WBGene00013816	23H target 22G	Y116F11A.1		2.79467	0	2.366	1.61224	4.64794	0	2.08655	1.27334		0	0	1.16124	0.64957	0	5.18806	0.891272	1.08125
WBGene00194650	23H target 22G	C36A4.14		2.79467	0	3.87163	2.50793	9.29587	0	4.74217	5.09334		0	0	1.9354	1.94871	9.55582	0	2.89664	2.88334
WBGene00001045	23H target 22G	dnj-27, Y47H9C.5		0	0	0	0	0	0	0	0		0	0	0	0	0	0	0	0.180209
WBGene00004512	23H target 22G	F31C3.7, rrn-1.1		0	0	0	0	0	0	0	0		0	0	0	0	0	0	0	0
WBGene00004513	23H target 22G	F31C3.8, rrn-1.2		0	0	0	0	0	0	0	0		0	0	0	0	0	0	0	0
WBGene00004567	23H target 22G	F31C3.11, rrn-2.1		0	0	0	0	0	0	0	0		0	0	0	0	0	0	0	0
WBGene00004622	23H target 22G	F31C3.9, rrn-3.1		0	0	0	0	0	0	0	0		0	0	0	0	0	0	0	0
WBGene00004677	23H target 22G	F31C3.10, rrn-3.56		0	0	0	0	0	0	0	0		0	0	0	0	0	0	0	0
WBGene00008944	23H target 22G	F19B2.5		0	0	0.215091	0	0	0	0	0		0	0	0	0	0	0	0	0
WBGene00012498	23H target 22G	Y24F12A.3		0	0	0.430181	0.895688	0	0	0.758747	0.636668		0	0	0.38708	0.162393	0	0	0.222818	0.540626
WBGene00012499	23H target 22G	Y24F12A.4		0	0	0.430181	1.07483	0	0	0.758747	0.636668		0	0	0.58062	0.162393	0	0	0.222818	0.540626
WBGene00013779	23H target 22G	Y116A8B.1		0	9.19093	1.29054	1.07483	0	7.23544	1.32781	1.27334		0	5.20251	0.9677	0.487178	4.77791	0	1.11409	1.44167
WBGene00020902	23H target 22G	jmjc-1, T28F2.4		0	0	3.44145	3.40361	4.64794	7.23544	3.98342	3.39556		0	5.20251	2.32248	1.94871	0	0	2.22818	1.9823
WBGene00022087	23H target 22G	Y69A2AR.16		0	0	1.72073	2.50793	9.29587	14.4709	2.27624	1.69778		0	0	1.35478	2.1111	0	0	2.451	2.52292
WBGene00023069	23H target 22G	F55A4.9, rncs-1		0	0	0.430181	0	4.64794	21.7063	0	0		0	0	0	0	0	0	0	0
WBGene00044200	23H target 22G	H37A05.4		0	0	0.215091	0.537413	0	0	0.948434	0.424445		0	0	0.19354	0.162393	0	0	0.668454	0.360417
WBGene00077552	23H target 22G	H15N14.4		0	0	0	0.179138	0	0	0.189687	0.212223		0	0	0.19354	0.162393	0	0	0	0.360417
WBGene00013325	ALG Class 26G	Y57G11C.36		55.8933	55.1456	19.7883	13.2562	41.8314	72.3544	17.6409	19.3123		34.7196	36.4176	12.193	10.7179	38.2233	41.5045	8.91272	14.7771
WBGene00007081	ALG Class 26G	AH6.3		8.384	0	1.07545	0.358275	0	0	0.379373	0		0	0	0.58062	0.324785	0	0	0	0.720835
WBGene00007352	ALG Class 26G	C06A1.1, cdc-48.1		8.384	0	0	0.179138	0	0	0.379373	0.424445		0	0	0	0	0	0	0	0.180209
WBGene00016415	ALG Class 26G	ampd-1, C34F11.3		8.384	0	0.430181	0.537413	0	0	0.189687	0.636668		0	0	0.38708	0	0	0	0.668454	0.180209
WBGene00000019	ALG Class 26G	abt-1, C24F3.5		5.58933	0	0.215091	0	0	0	0	0.212223		0	0	0	0	4.77791	0	0	0
WBGene00007080	ALG Class 26G	AH6.2, sfxn-1.1		5.58933	0	0	0.179138	0	0	0.189687	0.636668		0	0	0.19354	0.162393	0	0	0.222818	0.360417
WBGene00007307	ALG Class 26G	C04G2.8, spch-1		5.58933	4.59547	7.74326	5.55326	4.64794	0	4.17311	4.6689		0	0	6.7739	3.89742	9.55582	5.18806	4.45636	7.20835
WBGene00007777	ALG Class 26G	C27D8.1		5.58933	0	1.72073	1.61224	4.64794	0	2.27624	0.212223		0	0	1.9354	0.324785	0	0	0.445636	0.720835
WBGene00010373	ALG Class 26G	H08M01.1		5.58933	4.59547	0.430181	0.179138	0	0	0	0		0	0	0.38708	0.162393	0	0	0.445636	0
WBGene00012711	ALG Class 26G	Y39E4A.1		5.58933	0	0.215091	0	0	0	0	0.212223		0	0	0.38708	0.162393	4.77791	0	0.222818	0.180209
WBGene00014174	ALG Class 26G	ZK970.8		5.58933	0	0.645272	0.358275	0	0	0.379373	0.424445		0	0	0.19354	0.162393	0	5.18806	0	0.540626
WBGene00014223	ALG Class 26G	ZK1098.6		5.58933	0	0.430181	0.358275	0	0	0	0		3.85773	0	0.38708	0.64957	0	0	0.222818	0.540626
WBGene00017279	ALG Class 26G	F09C12.8		5.58933	0	0.645272	0.179138	0	0	0.948434	1.48556		7.71546	0	0.58062	0.162393	4.77791	0	0	0.360417
WBGene00018841	ALG Class 26G	F54H5.5		5.58933	0	0.430181	0.179138	0	0	0.758747	0		0	0	0.19354	0	0	0	0.222818	0
WBGene00019642	ALG Class 26G	K11C4.1		5.58933	0	0	0.895688	0	0	0.379373	1.69778		0	10.405	0.58062	0	9.55582	0	0	1.44167
WBGene00020986	ALG Class 26G	W03D8.3		5.58933	0	0.645272	0	0	0	0	0.212223		0	0	0.38708	0.324785	0	0	0.445636	0.360417
WBGene00021650	ALG Class 26G	Y47G6A.26		5.58933	0	0.215091	0.358275	0	0	0.189687	0.424445		0	0	0.19354	0.162393	0	0	0.445636	0.180209
WBGene00077519	ALG Class 26G	T27C10.8		5.58933	0	1.07545	1.61224	0	0	0.379373	0.636668		0	0	0	0.64957	0	0	0.445636	0.540626
WBGene00000475	ALG Class 26G	cey-4, Y39A1C.3		2.79467	0	0	0.179138	0	0	0	0		0	0	0	0	0	0	0	0
WBGene00003467	ALG Class 26G	K07F5.1, msp-81		2.79467	0	0.430181	0	0	0	0.379373	0		0	0	0	0.162393	0	0	0	0.360417
WBGene00004960	ALG Class 26G	spe-6, Y66D12A.20		2.79467	0	0.215091	0	0	0	0	0.424445		0	0	0	0	0	5.18806	0	0
WBGene00005012	ALG Class 26G	F26F4.2		2.79467	0	0.215091	0.71655	0	0	0.189687	0		0	0	0.19354	0.162393	0	0	0.445636	0
WBGene00006048	ALG Class 26G	ssp-31, ZK1225.6		2.79467	0	0	0.358275	0	0	0	0.212223		0	5.20251	0.19354	0.487178	0	0	0.445636	0.180209
WBGene00006050	ALG Class 26G	K07F5.11, ssq-1		2.79467	0	1.72073	1.4331	0	0	1.70718	1.48556		0	0	1.74186	2.43589	0	0	0.445636	0.720835
WBGene00006733	ALG Class 26G	F19B6.2, ufd-1		2.79467	0	0.215091	0	0	0	0.56906	0		0	0	0	0.162393	0	0	0	0
WBGene00007169	ALG Class 26G	B0393.4		2.79467	0	0.215091	0	0	0	0	0		0	0	0.19354	0	0	0	0	0
WBGene00007446	ALG Class 26G	C08F8.4, mboa-4		2.79467	0	0.860363	0.537413	0	0	0.56906	0.212223		0	5.20251	0.19354	0.162393	0	0	0.445636	0.360417
WBGene00007554	ALG Class 26G	C13G3.3, pptr-2		2.79467	0	0	0	0	0	0.379373	0		0	0	0	0.162393	0	0	0	0
WBGene00007714	ALG Class 26G	C25D7.1		2.79467	0	0.860363	0.71655	0	0	0.379373	0		0	0	0.38708	0.64957	0	0	0.445636	0.720835
WBGene00008230	ALG Class 26G	C50F4.2, pfk-1.2		2.79467	0	0.645272	0	0	0	0.189687	0.424445		0	0	0.19354	0	0	0	0	0
WBGene00008255	ALG Class 26G	C51E3.10		2.79467	4.59547	0.215091	0.895688	0	0	0	0.636668		3.85773	0	0.9677	0.811963	0	0	0.668454	0.540626
WBGene00008312	ALG Class 26G	C54G4.2		2.79467	0	0.215091	0	0	0	0	0		0	0	0	0.324785	0	0	0.445636	0
WBGene00008313	ALG Class 26G	C54G4.3		2.79467	0	0.215091	0	0	0	0	0		0	0	0	0	0	0	0	0.180209
WBGene00008651	ALG Class 26G	F10D11.5		2.79467	0	0.430181	0	0	0	0.189687	0		0	0	0	0	0	0	0.222818	0
WBGene00009079	ALG Class 26G	F23B12.1		2.79467	0	0.215091	0.537413	9.29587	0	0.56906	0		0	0	0.19354	0.324785	0	5.18806	0	0.540626
WBGene00009412	ALG Class 26G	F35E2.5		2.79467	0	0.645272	0	0	0	0	0		0	0	0.38708	0	0	0	0.445636	0.360417
WBGene00009478	ALG Class 26G	F36F2.4, syx-7		2.79467	0	0.215091	0.179138	0	0	0	0		0	0	0.58062	0	4.77791	0	0.222818	0.180209
WBGene00010139	ALG Class 26G	F56A8.3		2.79467	0	0	0	0	0	0	0		0	0	0	0	0	0	0	0
WBGene00010254	ALG Class 26G	F58E6.5		2.79467	0	0	0.537413	0	0	0.189687	0		0	0	0.19354	0.162393	4.77791	0	0	0
WBGene00010466	ALG Class 26G	K01D12.7		2.79467	0	1.07545	1.07483	0	0	1.32781	0.424445		0	0	0.77416	0.324785	4.77791	0	1.11409	1.44167
WBGene00010474	ALG Class 26G	K01D12.15		2.79467	0	1.07545	1.4331	0	0	1.32781	0.212223		0	0	0.77416	0.324785	4.77791	0	1.11409	0.901043
WBGene00010486	ALG Class 26G	K01H12.4		2.79467	0	0.215091	0.179138	0	0	0	0		0	0	0.38708	0.162393	0	0	0	0.180209
WBGene00011734	ALG Class 26G	mlc-5, T12D8.6		2.79467	0	0	0	0	0	0	0		0	0	0	0	0	0	0	0
WBGene00011918	ALG Class 26G	T22C1.8		2.79467	0	0	0.179138	4.64794	0	0.189687	0		0	0	0.38708	0	0	0	0.445636	0.540626
WBGene00012219	ALG Class 26G	W03C9.1		2.79467	0	0	0	0	0	0.379373	0		0	0	0.38708	0.162393	0	0	0.445636	0.360417
WBGene00012979	ALG Class 26G	Y48B6A.5		2.79467	0	0	0	0	0	0	0		0	0	0.19354	0.162393	0	5.18806	0	0
WBGene00013279	ALG Class 26G	Y57A10B.7		2.79467	0	0.645272	1.25396	0	0	0.758747	0.84889		0	0	0.77416	0.162393	0	0	0.445636	0.901043
WBGene00013304	ALG Class 26G	ptp-5.2, Y57G11C.6		2.79467	0	0	0.358275	0	0	0.189687	0.636668		0	0	0.19354	0.162393	0	0	0	0
WBGene00013388	ALG Class 26G	Y62F5A.10		2.79467	0	0	0	0	0	0	0.212223		0	0	0.19354	0	0	0	0.668454	0
WBGene00013475	ALG Class 26G	Y69E1A.3		2.79467	0	0.645272	0.537413	0	0	0.189687	0.212223		0	0	0.19354	0.487178	0	5.18806	0.445636	0.180209
WBGene00013524	ALG Class 26G	Y73F8A.15		2.79467	0	0	0.179138	0	0	0	0.424445		0	0	0.19354	0	0	5.18806	0	0
WBGene00013824	ALG Class 26G	Y116F11B.8		2.79467	0	0.215091	0.179138	0	0	0	0		0	0	0	0	0	0	0	0.180209
WBGene00013854	ALG Class 26G	cyc-2.2, ZC116.2		2.79467	0	0.215091	0.895688	0	0	0	0.212223		0	0	0	0.162393	0	0	0	0.180209
WBGene00013858	ALG Class 26G	ssp-34, ZC168.6		2.79467	4.59547	1.07545	0.895688	4.64794	0	0.948434	2.33445		0	5.20251	1.9354	0.487178	4.77791	0	0.222818	1.80209
WBGene00013978	ALG Class 26G	ZK507.1		2.79467	0	0.215091	0.179138	0	0	0.189687	0		0	0	0.38708	0	0	0	0	0
WBGene00014048	ALG Class 26G	ZK666.8		2.79467	0	0.860363	0.71655	0	0	1.32781	1.91		0	0	1.35478	1.46153	0	0	0.668454	0.720835
WBGene00014179	ALG Class 26G	ZK1010.5		2.79467	0	1.72073	1.25396	0	0	0	1.48556		0	0	0.77416	0.324785	4.77791	0	0.668454	0.720835
WBGene00015024	ALG Class 26G	B0205.10		2.79467	0	0.645272	0.71655	4.64794	0	0.379373	1.06111		0	0	0.77416	2.1111	0	0	0.891272	1.26146
WBGene00015089	ALG Class 26G	B0252.5		2.79467	0	0.215091	1.4331	4.64794	0	0	0.636668		3.85773	0	0.77416	0.487178	0	0	0	0.540626
WBGene00016445	ALG Class 26G	C35D10.8		2.79467	0	0.645272	0.537413	0	0	0.189687	0.212223		0	0	0.19354	0	0	0	0.445636	0.360417
WBGene00017215	ALG Class 26G	F07F6.1		2.79467	0	0.215091	0.358275	0	0	0.56906	0.636668		0	0	0.9677	0.487178	0	5.18806	0.668454	1.08125
WBGene00017325	ALG Class 26G	F10C1.3		2.79467	0	1.07545	0.537413	0	0	1.32781	0.84889		0	0	1.35478	0.974355	0	0	1.33691	1.9823
WBGene00018134	ALG Class 26G	F37A4.4		2.79467	0	1.50563	0.179138	0	0	0	0.212223		0	0	0.19354	0.324785	0	0	0.445636	0.720835
WBGene00018178	ALG Class 26G	F38E1.3		2.79467	0	0	0.179138	0	0	0.379373	0		0	0	0.58062	0.487178	0	0	0.668454	0.360417
WBGene00018253	ALG Class 26G	F40H6.1		2.79467	0	0.645272	0	0	0	0.379373	0		0	0	0.19354	0.324785	0	0	1.11409	0.180209
WBGene00018548	ALG Class 26G	clec-79, F47C12.4		2.79467	0	0	0	0	0	0	0		0	0	0.19354	0	0	0	0.222818	0
WBGene00019028	ALG Class 26G	F58A6.11, srb-13		2.79467	4.59547	0.430181	0.358275	0	0	0.189687	0		0	0	0.38708	0.162393	0	0	0.222818	0.180209
WBGene00019900	ALG Class 26G	R05G6.7, vdac-1		2.79467	0	0	0	0	0	0	0		0	0	0	0	0	0	0	0.540626
WBGene00020686	ALG Class 26G	T22D1.8		2.79467	0	0	0.179138	0	0	0	0.212223		0	0	0.19354	0.324785	0	0	0	0.180209
WBGene00020840	ALG Class 26G	spch-3, T27A3.4		2.79467	0	3.22636	2.14965	0	0	1.32781	2.75889		0	0	3.09664	1.62393	0	0	2.67382	2.52292
WBGene00021113	ALG Class 26G	gsp-3, W09C3.6		2.79467	4.59547	0	0.179138	0	0	0.189687	0.424445		0	0	0	0	0	0	0.222818	0
WBGene00021114	ALG Class 26G	W09C3.7		2.79467	0	0.215091	0.537413	0	0	0.379373	0		0	0	0.19354	0.162393	0	0	0	0.360417
WBGene00021470	ALG Class 26G	tpxl-1, Y39G10AR.12		2.79467	0	0.430181	0	0	7.23544	0.189687	0		3.85773	0	0.19354	0	0	0	0	0.360417
WBGene00022678	ALG Class 26G	sar-1, ZK180.4		2.79467	0	0	0.358275	0	0	0	0		0	0	0	0	0	0	0.222818	0
WBGene00022700	ALG Class 26G	ZK353.4		2.79467	4.59547	0	0	0	0	0.379373	0		0	0	0	0.162393	0	0	0	0.180209
WBGene00022834	ALG Class 26G	ZK973.8		2.79467	0	0	0.179138	0	0	0	0		0	0	0	0	0	0	0.222818	0
WBGene00044243	ALG Class 26G	F16C3.4		2.79467	0	0	0	0	0	0	0		0	0	0.38708	0.64957	0	0	0	0
WBGene00044674	ALG Class 26G	B0280.17		2.79467	0	0.645272	0	0	0	0.56906	0		3.85773	0	0.19354	0.324785	0	0	0.222818	0.180209
WBGene00194788	ALG Class 26G	R02D5.10		2.79467	0	0.645272	0.71655	0	0	0.758747	0.212223		0	0	0.19354	0.162393	0	0	0.668454	0.360417
WBGene00000023	ALG Class 26G	abt-5, Y53C10A.9		0	0	0.215091	0	0	0	0	0		0	0	0	0.162393	0	0	0	0.720835
WBGene00000041	ALG Class 26G	aco-2, F54H12.1		0	0	0	0	0	0	0	0		0	0	0	0	0	0	0	0
WBGene00000063	ALG Class 26G	act-1, T04C12.6		0	0	0	0	0	0	0	0		0	0	0.19354	0	0	0	0	0
WBGene00000064	ALG Class 26G	act-2, T04C12.5		0	0	0	0.537413	0	0	0.379373	0		0	0	0.38708	0	0	0	0.222818	0.901043
WBGene00000065	ALG Class 26G	act-3, T04C12.4		0	0	0.215091	0.179138	0	0	0.189687	0.212223		0	0	0.38708	0	0	0	0.222818	0.360417
WBGene00000098	ALG Class 26G	air-1, K07C11.2		0	0	0.215091	0	0	0	0	0		0	0	0	0	0	0	0.222818	0.180209
WBGene00000114	ALG Class 26G	alh-8, F13D12.4		0	0	0	0	0	0	0	0		0	0	0	0	0	0	0	0
WBGene00000150	ALG Class 26G	apm-1, F55A12.7		0	0	0	0	0	0	0	0		0	0	0	0	4.77791	0	0	0
WBGene00000182	ALG Class 26G	arf-1, B0336.2		0	0	0	0	0	0	0.379373	0.636668		0	0	0	0	0	0	0	0.360417
WBGene00000187	ALG Class 26G	arl-1, F54C9.10		0	0	0	0	0	0	0.189687	0		0	0	0	0	0	0	0	0
WBGene00000198	ALG Class 26G	art-1, C15F1.6		0	0	0	0	0	0	0	0		0	0	0	0	0	0	0	0
WBGene00000229	ALG Class 26G	atp-2, C34E10.6		0	0	0	0	0	0	0	0.212223		0	0	0	0	0	0	0	0
WBGene00000230	ALG Class 26G	atp-3, F27C1.7		0	0	0	0	0	0	0	0		0	0	0	0	0	0	0.222818	0
WBGene00000257	ALG Class 26G	bmk-1, F23B12.8		0	0	0	0	0	0	0	0		0	0	0	0	0	0	0	0
WBGene00000263	ALG Class 26G	F23H11.5		0	0	0	0	0	0	0	0		0	0	0	0	0	0	0	0
WBGene00000266	ALG Class 26G	bre-1, C53B4.7		0	0	0	0.179138	0	0	0.189687	0		0	0	0	0	0	0	0	0
WBGene00000268	ALG Class 26G	B0464.4, bre-3		0	0	0.215091	0	0	0	0.189687	0		0	0	0	0	0	0	0	0.180209
WBGene00000269	ALG Class 26G	bre-4, Y73E7A.7		0	0	0	0	4.64794	0	0	0.424445		0	0	0	0	0	5.18806	0.222818	0
WBGene00000275	ALG Class 26G	bub-1, R06C7.8		0	0	0.215091	0	0	0	0	0		0	0	0	0	0	0	0	0
WBGene00000389	ALG Class 26G	cdc-25.4, R05H5.2		0	0	0.430181	0	0	0	0	0		0	0	0	0	0	0	0.222818	0.180209
WBGene00000405	ALG Class 26G	cdk-1, T05G5.3		0	0	0	0	0	0	0.189687	0.212223		0	0	0	0.162393	0	0	0	0.360417
WBGene00000418	ALG Class 26G	C35D10.9, ced-4		0	0	0	0	0	0	0	0		0	0	0	0	0	0	0	0
WBGene00000426	ALG Class 26G	ced-12, Y106G6E.5		0	0	0	0	0	0	0	0		0	0	0	0	0	0	0	0
WBGene00000541	ALG Class 26G	cln-3.3, ZC190.1		0	0	0	0	0	0	0	0		0	0	0	0	0	0	0	0
WBGene00000552	ALG Class 26G	cmd-1, T21H3.3		0	0	1.07545	0.358275	0	0	0.56906	0		0	0	0.19354	0.487178	0	5.18806	0.222818	0.180209
WBGene00000567	ALG Class 26G	cnx-1, ZK632.6		0	0	0	0	0	0	0	0		0	0	0	0.324785	0	0	0	0
WBGene00000771	ALG Class 26G	C30B5.3, cpb-2		0	0	0.215091	0.179138	0	0	0.758747	0		0	0	0.19354	0	0	0	0	0.540626
WBGene00000777	ALG Class 26G	cpn-1, F43G9.9		0	0	0.215091	0	0	0	0	0		0	0	0	0	0	0	0	0.180209
WBGene00000802	ALG Class 26G	crt-1, Y38A10A.5		0	0	0.215091	0.179138	0	0	0.189687	0.424445		0	0	0	0.162393	0	0	0	0.180209
WBGene00000829	ALG Class 26G	ctb-1, MTCE.21		0	0	0	0	0	0	0	0		0	0	0	0	0	0	0	0
WBGene00000836	ALG Class 26G	cul-1, D2045.6		0	0	0	0	0	0	0	0		0	0	0	0	0	0	0	0
WBGene00000843	ALG Class 26G	cup-2, F25D7.1		0	0	0	0	0	0	0.189687	0.636668		0	0	0	0	0	0	0	0
WBGene00000875	ALG Class 26G	cyk-4, K08E3.6		0	4.59547	0	0.179138	0	0	0	0		0	0	0	0.162393	0	0	0.222818	0
WBGene00000878	ALG Class 26G	cyn-2, ZK520.5		0	0	0	0.537413	0	0	0.56906	0		0	0	0	0	0	0	0.445636	0.180209
WBGene00000881	ALG Class 26G	cyn-5, F31C3.1		0	0	0.645272	0	0	0	0.189687	0		0	0	0	0	0	0	0	0
WBGene00000896	ALG Class 26G	dad-1, F57B10.10		0	0	0	0	0	0	0.189687	0		0	0	0	0	0	0	0	0
WBGene00000915	ALG Class 26G	C47E8.5, hsp-90		0	0	0.645272	0.537413	0	0	1.13812	0		0	0	0	0.162393	0	0	0	0
WBGene00001005	ALG Class 26G	dlc-1, T26A5.9		0	0	0	0	0	0	0	0		0	0	0.19354	0.162393	4.77791	0	0	0
WBGene00001020	ALG Class 26G	B0035.2, dnj-2		0	0	0	0	0	0	0	0		0	0	0	0	0	0	0	0
WBGene00001023	ALG Class 26G	C04A2.7, dnj-5		0	0	0	0	0	0	0	0		0	0	0	0	0	0	0	0
WBGene00001037	ALG Class 26G	dnj-19, T05C3.5		0	0	0	0.358275	0	0	0	0		0	0	0	0.162393	0	0	0	0
WBGene00001038	ALG Class 26G	dnj-20, T15H9.7		0	0	0.430181	0	0	0	0	0		0	0	0	0	0	0	0	0
WBGene00001046	ALG Class 26G	dnj-28, Y54E10BL.4		0	0	0	0	0	0	0	0		0	0	0	0	0	0	0	0
WBGene00001153	ALG Class 26G	ech-4, R06F6.9		0	0	0	0	0	0	0	0		0	0	0	0.162393	0	0	0	0
WBGene00001155	ALG Class 26G	ech-6, T05G5.6		0	0	0	0	0	0	0	0.212223		0	0	0	0	0	0	0	0
WBGene00001167	ALG Class 26G	eef-2, F25H5.4		0	0	0	0.179138	0	0	0.189687	0		0	0	0	0	0	0	0	0
WBGene00001168	ALG Class 26G	eef-1A.1, F31E3.5		0	0	0.430181	0	0	0	0.189687	0		0	0	0.38708	0.64957	0	0	0.222818	1.26146
WBGene00001227	ALG Class 26G	eif-3.D, R08D7.3		0	0	0	0	0	0	0	0		0	0	0	0	0	0	0	0
WBGene00001230	ALG Class 26G	eif-3.G, F22B5.2		0	0	0	0	0	0	0	0		0	5.20251	0	0	0	0	0	0
WBGene00001245	ALG Class 26G	elo-7, F56H11.3		0	0	0.215091	0.179138	0	0	0.189687	0		0	0	0	0	0	0	0	0.540626
WBGene00001246	ALG Class 26G	elo-8, Y47D3A.30		0	0	0.215091	0	0	0	0	0.212223		0	0	0.19354	0.64957	0	0	0	0
WBGene00001303	ALG Class 26G	F32D8.6, sec-61.G		0	0	0.645272	0.358275	0	0	0.379373	1.48556		0	0	0.38708	0	0	0	0.222818	0.360417
WBGene00001334	ALG Class 26G	ero-1, Y105E8B.8		0	0	0	0	0	0	0	0		0	0	0	0	0	0	0.222818	0
WBGene00001371	ALG Class 26G	exl-1, F26H11.5		0	4.59547	0	0	0	0	0.189687	0.424445		0	0	0.38708	0	0	0	0.445636	0.180209
WBGene00001426	ALG Class 26G	F36H1.1, fkb-1		0	0	0	0	0	0	0.189687	0		0	0	0	0	0	0	0	0
WBGene00001427	ALG Class 26G	fkb-2, Y18D10A.19		0	0	0	0.179138	0	0	0	0		0	0	0	0	0	0	0	0
WBGene00001487	ALG Class 26G	frk-1, T04B2.2		0	0	0	0	0	0	0	0.212223		0	0	0.19354	0	0	0	0	0.180209
WBGene00001488	ALG Class 26G	frm-1, ZK270.2		0	0	0	0	0	0	0	0		0	0	0	0	0	0	0	0
WBGene00001505	ALG Class 26G	fut-1, K08F8.3		0	0	0	0	0	0	0	0		0	0	0	0	0	0	0	0
WBGene00001538	ALG Class 26G	F08B1.2, gcy-12		0	0	0	0	0	0	0.189687	0		0	0	0.19354	0	0	0	0	0
WBGene00001558	ALG Class 26G	gdi-1, Y57G11C.10		0	0	0	0	0	0	0	0		0	0	0	0	0	0	0.222818	0
WBGene00001565	ALG Class 26G	C14B9.6, gei-8		0	0	0	0	0	0	0	0		0	0	0.19354	0.162393	0	0	0	0
WBGene00001601	ALG Class 26G	glh-4, T12F5.3		0	0	0	0	0	0	0	0		0	0	0	0	0	0	0	0
WBGene00001603	ALG Class 26G	gln-2, K03H1.1		0	0	0	0	0	0	0	0		0	0	0	0	0	0	0	0
WBGene00001635	ALG Class 26G	gly-10, Y45F10D.3		0	0	0	0	0	0	0.189687	0		0	0	0	0	0	0	0	0
WBGene00001683	ALG Class 26G	gpd-1, T09F3.3		0	0	0.215091	0.179138	0	0	0	0		0	0	0	0	0	0	0	0
WBGene00001686	ALG Class 26G	F33H1.2, gpd-4		0	0	0	0	0	0	0	0		0	0	0	0	0	0	0	0
WBGene00001840	ALG Class 26G	C26D10.2, hel-1		0	0	0.215091	0	0	0	0	0		0	0	0	0.487178	0	0	0	0
WBGene00001855	ALG Class 26G	C18G1.5, hil-4		0	0	0	0	0	0	0.189687	0		0	0	0	0.162393	0	0	0	0
WBGene00001919	ALG Class 26G	B0035.10, his-45		0	0	0	0	0	0	0	0		0	0	0	0	0	0	0	0
WBGene00001944	ALG Class 26G	E03A3.4, his-70		0	4.59547	0.860363	1.4331	4.64794	0	0.189687	1.06111		3.85773	10.405	0.9677	0.811963	4.77791	5.18806	1.55973	0.360417
WBGene00001971	ALG Class 26G	hmg-1.1, Y48B6A.14		0	0	0	0	0	0	0	0		0	0	0	0	0	0	0	0
WBGene00001977	ALG Class 26G	hmg-12, Y17G7A.1		0	0	0	0	0	0	0	0		0	0	0.19354	0	0	0	0.222818	0.360417
WBGene00002005	ALG Class 26G	F26D10.3, hsp-1		0	0	0	0	0	0	0	0.212223		0	0	0	0	0	0	0	0
WBGene00002045	ALG Class 26G	C56C10.8, icd-1		0	0	0	0	0	0	0.189687	0		0	0	0	0	0	0	0	0
WBGene00002059	ALG Class 26G	F53A2.6, ife-1		0	0	0	0	0	0	0	0		0	0	0	0.162393	0	0	0	0.360417
WBGene00002064	ALG Class 26G	iff-1, T05G5.10		0	0	0.215091	0.179138	4.64794	0	0.189687	0.636668		0	0	0.38708	0.162393	4.77791	0	0.668454	0.180209
WBGene00002066	ALG Class 26G	ifg-1, M110.4		0	0	0	0	0	0	0	0		0	0	0	0	0	0	0	0
WBGene00002070	ALG Class 26G	ile-1, K07A1.8		0	0	0	0	0	0	0	0		0	0	0	0	0	0	0	0.180209
WBGene00002074	ALG Class 26G	F32E10.4, ima-3		0	0	0	0	0	0	0	0		0	0	0	0	0	0	0	0
WBGene00002083	ALG Class 26G	F57B9.6, inf-1		0	0	0.215091	0.179138	0	0	0	0.212223		0	0	0.38708	0	0	0	0	0.180209
WBGene00002147	ALG Class 26G	C41C4.4, ire-1		0	0	0	0	0	0	0	0		0	0	0	0	0	0	0	0
WBGene00002186	ALG Class 26G	kel-10, T16H12.6		0	0	0	0	0	0	0	0.424445		0	0	0.38708	0	0	0	0	0
WBGene00002191	ALG Class 26G	B0205.7, kin-3		0	0	0	0	0	0	0	0		0	0	0	0	0	0	0	0
WBGene00002193	ALG Class 26G	kin-5, T13H10.1		0	4.59547	0.430181	0	0	0	0	0.212223		0	0	0	0.487178	0	0	0	0
WBGene00002198	ALG Class 26G	F22D6.1, kin-14		0	0	0	0	0	0	0	0.212223		0	0	0	0	0	0	0.445636	0
WBGene00002202	ALG Class 26G	C03C10.1, kin-19		0	0	0	0	0	0	0	0		0	0	0	0	0	0	0	0
WBGene00002204	ALG Class 26G	kin-21, W08D2.8		0	0	1.72073	0.537413	0	0	0.948434	1.91		7.71546	0	0.38708	0.64957	0	0	0.222818	0.180209
WBGene00002206	ALG Class 26G	K07F5.4, kin-24		0	0	0	0	0	0	0.379373	0		0	0	0.38708	0	0	0	0	0.180209
WBGene00002208	ALG Class 26G	kin-26, T06C10.6		0	0	0.645272	0.71655	0	0	1.32781	0.636668		0	0	0.58062	0.324785	0	0	0.668454	0.540626
WBGene00002212	ALG Class 26G	B0523.1, kin-31		0	0	0	0.358275	0	0	0.189687	0.636668		0	5.20251	0	0.324785	0	0	0	0
WBGene00002219	ALG Class 26G	K11D9.1, klp-7		0	0	0	0	0	0	0	0		0	0	0	0	0	0	0	0.360417
WBGene00002227	ALG Class 26G	klp-17, W02B12.7		0	0	0.860363	0.358275	0	0	0.948434	0.212223		0	0	0	0.324785	0	0	0.222818	0
WBGene00002229	ALG Class 26G	klp-19, Y43F4B.6		0	0	0	0	0	0	0	0		0	0	0.19354	0	0	0	0	0
WBGene00002231	ALG Class 26G	C02F5.1, knl-1		0	0	0	0	0	0	0	0		0	0	0	0	0	0	0	0
WBGene00002250	ALG Class 26G	lap-2, W07G4.4		0	0	0	0	0	0	0	0		0	0	0	0	0	0	0	0
WBGene00002263	ALG Class 26G	K08H10.1, lea-1		0	0	0.215091	0	0	0	0	0		0	0	0	0	0	0	0	0
WBGene00002297	ALG Class 26G	ect-2, T19E10.1		0	0	0	0	0	0	0.379373	0.212223		0	0	0	0	0	0	0	0
WBGene00002344	ALG Class 26G	let-70, M7.1		0	0	0	0	0	0	0	0		0	0	0	0	0	0	0	0
WBGene00002694	ALG Class 26G	C10H11.9, let-502		0	0	0	0	0	7.23544	0	0		0	0	0	0	0	0	0.222818	0
WBGene00002783	ALG Class 26G	F57B10.1, let-607		0	0	0	0	0	0	0	0		0	0	0	0	0	0	0	0
WBGene00002855	ALG Class 26G	C05D11.12, let-721		0	0	0	0.179138	0	0	0.379373	0		0	0	0	0	0	0	0.222818	0
WBGene00002879	ALG Class 26G	C29E4.8, let-754		0	4.59547	0	0	0	0	0	0		0	0	0	0	0	0	0	0.360417
WBGene00003019	ALG Class 26G	H32C10.2, lin-33		0	0	0	0	0	0	0.189687	0		0	0	0	0	0	0	0.222818	0.180209
WBGene00003041	ALG Class 26G	lin-61, R06C7.7		0	0	1.07545	0.179138	0	0	0.189687	0.212223		0	0	0	0	0	0	0	0.180209
WBGene00003068	ALG Class 26G	lrk-1, T27C10.6		0	0	0.215091	0	0	0	0	0		0	0	0	0	0	0	0	0
WBGene00003162	ALG Class 26G	F20H11.3, mdh-2		0	0	0.215091	0	4.64794	0	0	0		0	0	0	0	0	0	0	0
WBGene00003424	ALG Class 26G	F26G1.7, msp-3		0	0	0	0	0	0	0	0		0	0	0	0	0	0	0	0
WBGene00003425	ALG Class 26G	K07F5.2, msp-10		0	0	0.215091	0.179138	0	0	0.189687	0		0	0	0.19354	0.162393	0	0	0	0.180209
WBGene00003426	ALG Class 26G	F36H12.7, msp-19		0	0	0.430181	0.179138	0	0	0	0.212223		0	0	0	0	0	0	0	0
WBGene00003431	ALG Class 26G	msp-33, R05F9.8		0	0	0	0.179138	0	0	0.56906	0.212223		0	0	0.58062	0.487178	0	0	0.222818	0.360417
WBGene00003432	ALG Class 26G	C04G2.4, msp-36		0	0	0.430181	0.179138	0	0	0.379373	0		0	0	0.38708	0.162393	4.77791	0	0	0
WBGene00003434	ALG Class 26G	K08F4.8, msp-38		0	0	0.430181	0.179138	0	0	0	0		0	0	0	0.324785	0	0	0.222818	0.540626
WBGene00003435	ALG Class 26G	C33F10.9, msp-40		0	0	0.215091	0.358275	0	0	1.13812	0		0	0	0.19354	0	0	0	0	0.180209
WBGene00003442	ALG Class 26G	C34F11.6, msp-49		0	0	0	0.358275	4.64794	0	0.56906	0.424445		0	0	0.9677	0	0	0	0	0
WBGene00003443	ALG Class 26G	C34F11.4, msp-50		0	0	0.430181	0	0	0	0.758747	0.424445		0	0	0	0	0	0	0.222818	0.180209
WBGene00003444	ALG Class 26G	msp-51, ZK354.5		0	0	0.860363	0.179138	0	0	0.189687	0		0	0	0	0.162393	0	0	0.222818	0.180209
WBGene00003446	ALG Class 26G	msp-53, R13H9.4		0	0	0.645272	0.179138	0	0	0	0.212223		0	0	0	0.162393	0	0	0.222818	0
WBGene00003448	ALG Class 26G	C09B9.6, msp-55		0	0	0.215091	0.179138	0	0	0.189687	0		0	0	0	0	0	0	0	0.180209
WBGene00003449	ALG Class 26G	K07F5.3, msp-56		0	0	0.215091	0.179138	0	0	0.189687	0		0	0	0.19354	0.162393	0	0	0	0.180209
WBGene00003450	ALG Class 26G	msp-57, R13H9.2		0	0	0.430181	0.179138	0	0	0.379373	0		0	0	0.19354	0	0	0	0.222818	0.180209
WBGene00003452	ALG Class 26G	msp-59, ZK354.11		0	0	0.215091	0	0	0	0.189687	0		0	0	0.38708	0	0	0	0	0
WBGene00003458	ALG Class 26G	msp-65, ZK354.1		0	0	0.645272	0.179138	0	0	0.379373	0		0	0	0	0	0	0	0	0.180209
WBGene00003463	ALG Class 26G	msp-76, ZK1251.6		0	0	0	0.179138	0	0	0.189687	0.636668		0	0	0.38708	0	0	0	0.445636	0
WBGene00003464	ALG Class 26G	F32B6.6, msp-77		0	0	0	0.179138	0	0	0	0.424445		0	0	0.19354	0.162393	0	0	0	0
WBGene00003465	ALG Class 26G	msp-78, T13F2.11		0	0	0.215091	0.179138	0	0	0	0		0	0	0	0	0	0	0.222818	0.180209
WBGene00003469	ALG Class 26G	K05F1.2, msp-142		0	0	0.860363	0	0	0	0	0		0	0	0.38708	0	0	0	0	0.180209
WBGene00003470	ALG Class 26G	msp-152, ZK546.6		0	0	0	0.179138	0	0	0	0.212223		3.85773	0	0	0	0	0	0.222818	0
WBGene00003562	ALG Class 26G	F09G8.4, ncr-2		0	0	0.860363	0.179138	0	0	0	0.212223		0	0	0.77416	0	0	0	0.668454	0.720835
WBGene00003576	ALG Class 26G	ndc-80, W01B6.9		0	0	0	0	0	0	0	0		0	0	0.19354	0	0	0	0	0
WBGene00003579	ALG Class 26G	ndx-2, W02G9.1		0	0	0	0	0	0	0.379373	0.212223		0	0	0	0	0	0	0.222818	0
WBGene00003587	ALG Class 26G	F45H11.2, ned-8		0	0	0	0	0	0	0	0		0	0	0	0	0	0	0	0.180209
WBGene00003742	ALG Class 26G	F59C6.6, nlp-4		0	0	0	0	0	0	0	0		0	0	0	0	0	0	0	0
WBGene00003831	ALG Class 26G	C09H10.3, nuo-1		0	0	0	0	0	0	0	0		0	0	0	0.162393	0	0	0	0
WBGene00003864	ALG Class 26G	C09G9.6, oma-1		0	0	0	0	0	0	0.189687	0		0	0	0	0	0	0	0	0
WBGene00003902	ALG Class 26G	pab-1, Y106G6H.2		0	0	0.430181	0	0	0	0	0.212223		0	0	0.19354	0.162393	0	0	0	0
WBGene00003906	ALG Class 26G	paf-1, W03G9.6		0	0	0	0	0	0	0	0		0	0	0	0	0	0	0	0
WBGene00003920	ALG Class 26G	M117.2, par-5		0	0	0	0	0	0	0.189687	0		0	0	0	0	0	0	0.668454	0
WBGene00003922	ALG Class 26G	C15H11.7, pas-1		0	0	0	0	0	0	0	0		0	0	0	0	0	0	0	0
WBGene00003924	ALG Class 26G	pas-3, Y110A7A.14		0	0	0	0	0	0	0	0		0	0	0	0	0	0	0	0
WBGene00003925	ALG Class 26G	C36B1.4, pas-4		0	0	0	0	0	0	0	0		0	0	0	0	0	0	0	0
WBGene00003926	ALG Class 26G	F25H2.9, pas-5		0	0	0	0.179138	4.64794	0	0	0		0	0	0	0.162393	0	0	0	0
WBGene00003927	ALG Class 26G	CD4.6, pas-6		0	0	0	0	0	0	0	0		0	0	0	0	0	0	0	0
WBGene00003928	ALG Class 26G	pas-7, ZK945.2		0	0	0	0	0	0	0.189687	0		0	0	0	0	0	0	0.668454	0
WBGene00003947	ALG Class 26G	K08D12.1, pbs-1		0	0	0	0	0	0	0	0		0	0	0	0	0	0	0	0
WBGene00003948	ALG Class 26G	C47B2.4, pbs-2		0	0	0	0	0	0	0	0		3.85773	0	0	0	0	0	0	0.180209
WBGene00003949	ALG Class 26G	pbs-3, Y38A8.2		0	0	0	0	0	0	0	0		0	0	0	0	0	0	0	0
WBGene00003951	ALG Class 26G	K05C4.1, pbs-5		0	0	0	0	0	0	0	0		0	0	0	0	0	0	0	0
WBGene00003952	ALG Class 26G	C02F5.9, pbs-6		0	0	0	0	0	14.4709	0.379373	0		0	0	0	0	0	0	0	0
WBGene00003953	ALG Class 26G	F39H11.5, pbs-7		0	0	0	0.179138	0	0	0	0.212223		0	0	0	0	0	0	0	0
WBGene00003964	ALG Class 26G	H06O01.1, pdi-3		0	0	0.215091	0	0	0	0.379373	0		0	0	0.58062	0.162393	0	0	0.222818	0.360417
WBGene00003989	ALG Class 26G	pfn-1, Y18D10A.20		0	0	0	0	0	0	0.189687	0		0	0	0	0.162393	0	0	0	0.180209
WBGene00003992	ALG Class 26G	pgl-1, ZK381.4		0	0	0	0.179138	0	0	0.189687	0.212223		0	0	0	0	0	0	0.222818	0
WBGene00003994	ALG Class 26G	C18G1.4, pgl-3		0	0	0.215091	0	0	0	0	0.212223		0	0	0	0	0	0	0.222818	0
WBGene00004042	ALG Class 26G	C14B9.4, plk-1		0	0	0	0.179138	0	0	0.379373	0		0	0	0.19354	0.162393	0	0	0	0.180209
WBGene00004044	ALG Class 26G	F55G1.8, plk-3		0	0	0	0	0	0	0	0		0	0	0	0	0	0	0	0
WBGene00004046	ALG Class 26G	F45E4.2, plp-1		0	0	0	0	0	0	0	0		0	0	0.58062	0	0	0	0	0
WBGene00004075	ALG Class 26G	pod-1, Y76A2B.1		0	0	0	0	0	0	0	0		0	0	0.58062	0	0	0	0	0
WBGene00004084	ALG Class 26G	C29E6.3, pph-2		0	0	0.430181	0.179138	0	0	0.379373	0.212223		0	0	0	0	0	0	0	0
WBGene00004109	ALG Class 26G	C34G6.7, stam-1		0	0	0	0	0	0	0	0		0	0	0	0	0	0	0.222818	0
WBGene00004178	ALG Class 26G	D2030.6, prg-1		0	0	0	0	0	0	0	0		0	0	0	0	0	0	0	0
WBGene00004208	ALG Class 26G	ptc-1, ZK675.1		0	0	0	0	0	0	0	0		0	0	0	0	0	0	0	0
WBGene00004242	ALG Class 26G	F18A11.1, puf-6		0	0	0	0	0	0	0	0		0	0	0	0	0	0	0	0
WBGene00004243	ALG Class 26G	B0273.2, puf-7		0	0	0	0	0	0	0	0		0	0	0	0	0	0	0	0
WBGene00004266	ALG Class 26G	C39F7.4, rab-1		0	0	0	0	0	0	0	0		0	0	0	0	0	0	0	0
WBGene00004269	ALG Class 26G	F59B2.7, rab-6.1		0	0	0	0	0	0	0	0		0	0	0	0	0	0	0	0
WBGene00004274	ALG Class 26G	F53G12.1, rab-11.1		0	0	0	0	0	0	0.189687	0		0	0	0	0.162393	0	0	0	0
WBGene00004302	ALG Class 26G	K01G5.4, ran-1		0	0	0	0	0	0	0.189687	0		0	0	0.19354	0	0	0	0	0
WBGene00004310	ALG Class 26G	C44C11.1, ras-1		0	0	0	0	0	0	0	0		0	0	0	0	0	0	0	0
WBGene00004320	ALG Class 26G	rbx-1, ZK287.5		0	0	0	0	0	0	0	0		0	0	0	0	0	0	0	0
WBGene00004373	ALG Class 26G	rme-1, W06H8.1		0	0	0	0	0	0	0	0		0	0	0	0	0	0	0	0
WBGene00004439	ALG Class 26G	F52B5.6, rpl-25.2		0	0	0	0	0	0	0	0		0	0	0	0	0	0	0	0
WBGene00004458	ALG Class 26G	rpn-1, T22D1.9		0	0	0	0	0	0	0	0		0	0	0	0	0	0	0.222818	0
WBGene00004460	ALG Class 26G	C30C11.2, rpn-3		0	0	0.215091	0	0	0	0	0		0	0	0	0	0	0	0	0
WBGene00004461	ALG Class 26G	F10G7.8, rpn-5		0	0	0	0	0	0	0	0.212223		0	0	0	0.162393	0	0	0	0
WBGene00004464	ALG Class 26G	R12E2.3, rpn-8		0	0	0.215091	0	0	0	0	0.424445		0	0	0	0	0	0	0	0
WBGene00004465	ALG Class 26G	rpn-9, T06D8.8		0	0	0	0	0	0	0	0		0	0	0.19354	0	0	0	0	0.360417
WBGene00004466	ALG Class 26G	B0205.3, rpn-10		0	0	0	0.179138	0	0	0	0		0	0	0	0	0	0	0	0.540626
WBGene00004468	ALG Class 26G	rpn-12, ZK20.5		0	0	0.215091	0	0	0	0.189687	0		0	0	0.19354	0	0	0	0	0
WBGene00004469	ALG Class 26G	B0393.1, rps-0		0	0	0	0	0	0	0	0		0	0	0.19354	0	0	0	0	0
WBGene00004487	ALG Class 26G	rps-18, Y57G11C.16		0	0	0	0	0	0	0	0.212223		0	0	0	0	0	0	0	0
WBGene00004496	ALG Class 26G	F56E10.4, rps-27		0	0	0	0	0	0	0	0		0	0	0	0.162393	0	0	0	0
WBGene00004501	ALG Class 26G	C52E4.4, rpt-1		0	0	0	0	0	0	0	0		0	0	0	0	0	0	0	0
WBGene00004502	ALG Class 26G	F29G9.5, rpt-2		0	0	0	0	0	0	0	0		0	0	0	0.162393	0	0	0	0
WBGene00004504	ALG Class 26G	F23F1.8, rpt-4		0	0	0.215091	0	0	0	0.379373	0		0	0	0	0	0	0	0	0.180209
WBGene00004505	ALG Class 26G	F56H1.4, rpt-5		0	0	0	0	0	0	0	0		0	0	0	0	0	0	0	0
WBGene00004698	ALG Class 26G	rsp-1, W02B12.3		0	0	0	0	0	0	0	0		0	0	0	0	0	0	0.222818	0
WBGene00004700	ALG Class 26G	rsp-3, Y111B2A.18		0	0	0.430181	0.179138	0	0	0.189687	0.212223		0	0	0.19354	0.162393	0	0	0.222818	0.180209
WBGene00004703	ALG Class 26G	C33H5.12, rsp-6		0	0	0	0	0	0	0	0		0	0	0	0.162393	0	0	0.222818	0
WBGene00004705	ALG Class 26G	C18D11.4, rsp-8		0	0	0	0	0	0	0	0		0	0	0	0.324785	0	0	0	0
WBGene00004737	ALG Class 26G	F10G7.4, scc-1		0	0	0	0	0	0	0.379373	0		0	0	0	0	0	0	0	0
WBGene00004759	ALG Class 26G	F45D3.5, sel-1		0	0	0.215091	0	0	0	0	0		0	0	0	0	0	0	0.222818	0
WBGene00004768	ALG Class 26G	F55A11.3, sel-11		0	0	0.430181	0	0	0	0	0		3.85773	0	0	0	0	0	0	0.180209
WBGene00004798	ALG Class 26G	F43D9.4, sip-1		0	0	0	0	0	0	0	0		0	0	0	0	0	0	0	0
WBGene00004808	ALG Class 26G	F46A9.4, skr-2		0	0	0	0	0	0	0.189687	0		0	0	0	0	0	0	0	0
WBGene00004888	ALG Class 26G	K12C11.2, smo-1		0	0	0	0	0	0	0	0		0	0	0	0	0	0	0.222818	0
WBGene00004901	ALG Class 26G	F55H12.1, snf-2		0	0	0	0	0	0	0	0.212223		0	0	0	0.162393	4.77791	0	0.445636	0
WBGene00004904	ALG Class 26G	snf-5, Y46G5A.30		0	0	0	0	0	0	0	0		0	0	0	0	0	0	0	0.180209
WBGene00004906	ALG Class 26G	snf-7, ZK1010.9		0	0	0.215091	1.07483	0	0	0.56906	0.212223		0	0	0.19354	0.974355	0	0	0	0.180209
WBGene00004908	ALG Class 26G	C49C3.1, snf-9		0	0	0	0.179138	0	0	0.189687	0		7.71546	0	0.19354	0	0	0	0.445636	0
WBGene00004909	ALG Class 26G	snf-10, Y32F6A.2		0	0	0.215091	0	0	0	0.379373	0		0	0	0.38708	0	0	0	0	0.180209
WBGene00004930	ALG Class 26G	C15F1.7, sod-1		0	0	0	0	0	0	0	0.212223		0	0	0	0	0	0	0	0
WBGene00004931	ALG Class 26G	F10D11.1, sod-2		0	0	0	0	0	0	0	0		0	0	0	0	0	0	0.222818	0
WBGene00004953	ALG Class 26G	F32H2.3, spd-2		0	0	0.215091	0	0	0	0.56906	0		0	0	0	0	0	0	0	0
WBGene00004958	ALG Class 26G	spe-4, ZK524.1		0	0	0.215091	0	0	0	0	0		0	0	0	0	0	0	0	0
WBGene00004959	ALG Class 26G	spe-5, Y110A7A.12		0	0	0	0	0	0	0.189687	0		0	0	0	0	0	0	0	0
WBGene00004964	ALG Class 26G	AC3.10, spe-10		0	0	0	0.179138	0	0	0.189687	0		0	0	0.19354	0.162393	0	0	0.222818	0.360417
WBGene00004965	ALG Class 26G	F48C1.7, spe-11		0	0	0	0	4.64794	0	0.189687	0		0	0	0	0.162393	0	5.18806	0.222818	0.180209
WBGene00004971	ALG Class 26G	spe-17, ZK617.3		0	0	0.215091	0	0	0	0	0.212223		0	0	0.19354	0	4.77791	0	0	0
WBGene00004972	ALG Class 26G	R10H10.2, spe-26		0	0	0	0	0	0	0.189687	0		0	0	0.19354	0	0	0	0.222818	0
WBGene00004973	ALG Class 26G	C06E7.6, spe-27		0	0	0	0	0	0	0	0		0	0	0	0	0	0	0	0
WBGene00004975	ALG Class 26G	spe-39, ZC404.3		0	0	0.215091	0	0	0	0	0		0	0	0	0.162393	0	0	0	0.180209
WBGene00004976	ALG Class 26G	K01A11.4, spe-41		0	0	0	0.358275	0	0	0	0.212223		0	0	0	0	0	0	0	0
WBGene00005011	ALG Class 26G	F26F4.8		0	0	0	0	0	0	0	0.212223		0	0	0.38708	0	0	0	0	0
WBGene00005019	ALG Class 26G	D2096.4, sqv-1		0	0	0	0	0	0	0	0		0	0	0	0	0	0	0	0
WBGene00006038	ALG Class 26G	E03H12.10, ssp-9		0	0	0.430181	0.179138	0	0	0.56906	0.212223		0	0	0	0	0	0	0.222818	0.360417
WBGene00006039	ALG Class 26G	K07F5.9, ssp-10		0	0	0.645272	0.179138	0	0	0.56906	0.424445		0	0	0.19354	0.324785	4.77791	0	0	1.26146
WBGene00006040	ALG Class 26G	ssp-11, T28H11.6		0	0	0.430181	0.179138	0	0	0.56906	0.212223		0	0	0	0	0	0	0.222818	0.360417
WBGene00006044	ALG Class 26G	ssp-16, T27A3.3		0	0	1.29054	1.79138	0	7.23544	2.27624	2.33445		0	0	1.74186	1.78632	4.77791	0	1.33691	2.34271
WBGene00006047	ALG Class 26G	C55C2.2, ssp-19		0	0	0	0.179138	0	0	0	0.212223		0	0	0.19354	0	0	0	0	0.180209
WBGene00006049	ALG Class 26G	F32B6.7, ssp-32		0	0	0	0	0	0	0	0		0	0	0	0	0	0	0	0
WBGene00006051	ALG Class 26G	ssq-2, T28H11.5		0	0	0.645272	0.179138	4.64794	0	1.70718	0.424445		0	0	0.19354	0.162393	0	0	0.445636	0.180209
WBGene00006053	ALG Class 26G	ssq-4, T28H11.1		0	0	0.215091	0.537413	0	0	0.56906	0.212223		0	0	0.38708	0.324785	0	0	0	0
WBGene00006058	ALG Class 26G	F54C1.9, sst-20		0	0	0.215091	0	0	0	0	0.212223		0	0	0	0	0	0	0	0
WBGene00006059	ALG Class 26G	F54C9.2, stc-1		0	0	0	0.179138	0	0	0.189687	0		0	0	0	0	0	0	0.222818	0
WBGene00006373	ALG Class 26G	F55A11.2, syx-5		0	0	0	0	0	0	0.189687	0		0	0	0	0.324785	0	0	0	0
WBGene00006376	ALG Class 26G	C24G6.1, syp-2		0	0	0	0	0	0	0	0		0	0	0	0	0	0	0	0
WBGene00006409	ALG Class 26G	C09G9.4, hdl-2		0	0	0.215091	0.179138	4.64794	0	0	0.212223		0	0	0	0	0	0	0	0
WBGene00006433	ALG Class 26G	F42A8.2, sdhb-1		0	0	0	0	0	0	0	0		0	0	0	0	0	0	0	0
WBGene00006449	ALG Class 26G	alg-4, ZK757.3		0	0	0.430181	0	0	0	0.379373	0		0	0	0.38708	0.162393	0	0	0	0
WBGene00006509	ALG Class 26G	tag-164, Y76A2A.1		0	0	0.860363	0.358275	0	0	0.758747	0		0	0	0	0	0	5.18806	0.222818	0
WBGene00006519	ALG Class 26G	cox-6A, F54D8.2		0	0	0	0	0	0	0	0		0	0	0	0	0	0	0	0
WBGene00006529	ALG Class 26G	C47B2.3, tba-2		0	0	0.430181	0	0	7.23544	0.379373	0		0	0	0.19354	0.162393	0	0	0	0.180209
WBGene00006536	ALG Class 26G	K01G5.7, tbb-1		0	0	0	0.179138	0	0	0	0		0	0	0	0	0	0	0	0
WBGene00006537	ALG Class 26G	C36E8.5, tbb-2		0	4.59547	0.215091	0	0	0	0	0		0	0	0	0	0	0	0.668454	0.540626
WBGene00006590	ALG Class 26G	toc-1, ZC395.3		0	0	0.215091	0	0	0	0.189687	0		0	0	0.19354	0	0	0	0	0
WBGene00006594	ALG Class 26G	M01A10.2, tom-1		0	0	0	0	0	0	0	0		0	5.20251	0	0.487178	0	0	0	0
WBGene00006624	ALG Class 26G	F48A9.3, try-6		0	0	0	0	0	0	0	0.424445		3.85773	0	0	0	0	0	0	0
WBGene00006625	ALG Class 26G	try-7, ZC581.6		0	0	0	0	0	0	0	0		0	0	0	0	0	0	0	0
WBGene00006626	ALG Class 26G	F10G7.2, tsn-1		0	0	0	0	0	0	0	0		0	0	0	0	0	0	0	0
WBGene00006644	ALG Class 26G	F59G1.2, tsp-18		0	0	0	0.179138	0	0	0.379373	0		0	0	0	0	0	0	0	0
WBGene00006661	ALG Class 26G	F17C8.5, twk-6		0	0	0	0	0	0	0	0		0	0	0	0.162393	0	0	0.222818	0
WBGene00006699	ALG Class 26G	C47E12.5, uba-1		0	0	0	0	0	0	0	0.212223		0	0	0	0	0	0	0	0
WBGene00006704	ALG Class 26G	F58A4.10, ubc-7		0	0	1.07545	0.537413	0	0	0	0.424445		0	0	0.77416	0.324785	0	0	1.33691	0.901043
WBGene00006713	ALG Class 26G	R01H2.6, ubc-18		0	0	0	0.179138	0	0	0	0.212223		0	0	0	0	0	0	0	0
WBGene00006715	ALG Class 26G	F40G9.3, ubc-20		0	0	0	0	0	0	0.379373	0		0	0	0.19354	0	0	0	0	0
WBGene00006719	ALG Class 26G	F49E12.4, ubc-24		0	0	0.215091	0.358275	0	0	0	0.424445		0	0	0	0.162393	0	0	0.222818	0.360417
WBGene00006720	ALG Class 26G	F25H2.8, ubc-25		0	0	0	0.179138	0	0	0	0		0	0	0	0	0	0	0	0
WBGene00006727	ALG Class 26G	F25B5.4, ubq-1		0	0	0	0.179138	0	0	0.189687	0		0	0	0.38708	0	0	0	0	0.180209
WBGene00006728	ALG Class 26G	ubq-2, ZK1010.1		0	0	0.430181	0	0	0	0	0		0	0	0	0	0	0	0	0
WBGene00006734	ALG Class 26G	T05H10.5, ufd-2		0	0	0	0	0	0	0	0		0	0	0	0	0	0	0	0
WBGene00006768	ALG Class 26G	unc-32, ZK637.8		0	0	0	0	0	0	0.379373	0		0	0	0	0	0	0	0	0
WBGene00006785	ALG Class 26G	T07A5.2, unc-50		0	0	0	0	0	0	0	0		0	0	0	0	0	0	0	0
WBGene00006789	ALG Class 26G	F11C3.3, unc-54		0	0	0	0	0	0	0	0		0	0	0	0	0	0	0	0
WBGene00006794	ALG Class 26G	C38C3.5, unc-60		0	0	0	0	0	0	0	0		0	0	0	0	0	0	0.222818	0
WBGene00006833	ALG Class 26G	F53F10.4, unc-108		0	0	0	0	0	0	0	0		0	0	0	0	0	0	0	0
WBGene00006888	ALG Class 26G	vbh-1, Y54E10A.9		0	0	0	0	0	0	0	0		0	0	0	0	0	0	0.222818	0
WBGene00006910	ALG Class 26G	R10E11.8, vha-1		0	0	0	0	0	0	0	0		0	0	0	0	0	0	0	0
WBGene00006911	ALG Class 26G	R10E11.2, vha-2		0	0	0.430181	0	0	0	0.189687	0.212223		0	0	0.19354	0	0	0	0	0.720835
WBGene00006917	ALG Class 26G	C17H12.14, vha-8		0	0	0	0.179138	0	0	0	0		0	0	0	0	0	0	0	0.180209
WBGene00006918	ALG Class 26G	vha-9, ZK970.4		0	0	0	0	0	0	0	0		0	0	0	0	0	0	0	0
WBGene00006924	ALG Class 26G	F56D12.5, vig-1		0	0	0	0	0	0	0	0		0	0	0	0	0	0	0.222818	0
WBGene00006940	ALG Class 26G	wee-1.3, Y53C12A.1		0	0	0	0	0	0	0	0		0	0	0	0	0	0	0	0
WBGene00006975	ALG Class 26G	F54F2.2, zfp-1		0	0	0	0	0	0	0	0		0	0	0	0	0	0	0	0
WBGene00007082	ALG Class 26G	acs-10, AH10.1		0	0	0.215091	0	4.64794	0	0.56906	0.84889		0	0	0	0.487178	0	0	0	0.901043
WBGene00007117	ALG Class 26G	B0240.2, spe-42		0	0	0	0	0	0	0	0		0	0	0	0	0	0	0	0
WBGene00007156	ALG Class 26G	B0379.2		0	0	0	0	0	0	0.189687	0		0	0	0	0	0	0	0	0
WBGene00007159	ALG Class 26G	B0379.7		0	0	0.215091	0	0	0	0	0		0	0	0.19354	0.162393	0	0	0.222818	0
WBGene00007190	ALG Class 26G	B0491.3, rmd-3		0	0	0.645272	0	0	0	0	0		0	0	0.19354	0	0	0	0	0.180209
WBGene00007209	ALG Class 26G	BE10.1		0	0	0.645272	0	0	0	0.189687	0.212223		0	0	0	0	0	0	0	0
WBGene00007222	ALG Class 26G	C01F6.2		0	0	0	0	0	0	0	0		0	0	0	0	0	0	0	0
WBGene00007223	ALG Class 26G	C01F6.9		0	0	0	0	0	0	0	0		0	5.20251	0.19354	0	0	0	0	0.180209
WBGene00007230	ALG Class 26G	C01G10.1		0	0	0	0	0	0	0	0		0	0	0	0	0	0	0	0
WBGene00007239	ALG Class 26G	C01G10.14		0	0	0.860363	0.71655	0	0	0.189687	0		0	0	0.19354	0.487178	0	0	0.445636	0.720835
WBGene00007244	ALG Class 26G	C01G12.3		0	0	0	0	0	0	0	0.424445		0	0	0	0	0	0	0	0
WBGene00007248	ALG Class 26G	C01G12.8, catp-4		0	0	0	0	0	0	0	0		0	0	0	0.162393	0	0	0.445636	0
WBGene00007249	ALG Class 26G	C01G12.9		0	0	0	0	4.64794	0	0	0		0	0	0	0	0	0	0	0.180209
WBGene00007255	ALG Class 26G	C01H6.6, cnnm-4		0	0	0	0	0	0	0	0		0	0	0	0.162393	0	0	0	0
WBGene00007269	ALG Class 26G	C03C10.2		0	0	0	0	0	0	0.189687	0		0	0	0.19354	0.162393	0	0	0.222818	0
WBGene00007270	ALG Class 26G	C03C10.4, rei-1		0	0	0.430181	0	0	0	0	0		0	0	0.38708	0	0	0	0	0
WBGene00007274	ALG Class 26G	C03C11.1		0	0	0	0	0	7.23544	0.189687	0		0	0	0.9677	0	0	0	0	0.180209
WBGene00007305	ALG Class 26G	C04G2.2, ttbk-5		0	0	0.215091	0.358275	0	0	0.379373	0		0	0	0.19354	0.324785	0	0	0.891272	0.720835
WBGene00007306	ALG Class 26G	C04G2.5		0	0	0	0.358275	0	0	0	0		0	0	1.16124	0	0	0	0.222818	0.360417
WBGene00007308	ALG Class 26G	C04G2.9		0	0	0	0.179138	0	0	0.189687	0.424445		0	0	0	0	0	0	0.445636	0.360417
WBGene00007309	ALG Class 26G	C04G2.10		0	0	0	0	0	0	0	0		0	0	0	0	0	0	0	0
WBGene00007335	ALG Class 26G	C05C12.1		0	0	0.215091	0.537413	0	0	0.189687	0		0	0	0.77416	0	0	0	0	0.360417
WBGene00007337	ALG Class 26G	C05C12.5		0	0	1.50563	0.358275	4.64794	0	1.13812	1.48556		0	0	0.9677	0.162393	0	0	0.222818	0.720835
WBGene00007354	ALG Class 26G	C06A1.3		0	0	0	0.358275	0	0	0.379373	0.212223		3.85773	0	0	0	0	0	0.445636	0.901043
WBGene00007363	ALG Class 26G	C06B3.4, stdh-1		0	0	0.215091	0	0	0	0	0		0	0	0	0	0	0	0	0
WBGene00007381	ALG Class 26G	C06C6.7		0	0	0.430181	0	0	0	0	0		0	0	0	0	0	0	0	0
WBGene00007382	ALG Class 26G	C06C6.8		0	0	0	0	0	0	0	0		0	0	0	0	0	0	0	0
WBGene00007383	ALG Class 26G	C06C6.9		0	0	0	0	0	0	0	0		0	0	0	0	0	0	0	0
WBGene00007385	ALG Class 26G	atp-5, C06H2.1		0	0	0	0	0	0	0	0		0	0	0	0	0	0	0	0
WBGene00007415	ALG Class 26G	C07E3.4		0	0	0	0	0	0	0	0		0	0	0	0	0	0	0	0.180209
WBGene00007448	ALG Class 26G	C08F8.6		0	0	0	0	0	0	0	0		0	0	0.58062	0.162393	0	0	0	0
WBGene00007457	ALG Class 26G	C08F11.10		0	0	0	0.179138	0	0	0.189687	0.212223		0	0	0	0.487178	0	0	1.11409	0.360417
WBGene00007478	ALG Class 26G	C09F9.1		0	0	0.215091	0	0	0	0	0		0	0	0	0	0	0	0.668454	0
WBGene00007489	ALG Class 26G	C09G5.7		0	0	0.430181	0.179138	0	0	0	0		0	0	0	0	0	0	0	0.180209
WBGene00007512	ALG Class 26G	C10C6.3		0	0	0.645272	0.358275	0	0	0.189687	0		0	0	0.38708	0.162393	0	0	0.222818	0.180209
WBGene00007538	ALG Class 26G	C12D8.9		0	0	0	0	0	0	0.189687	0.424445		0	0	0	0.162393	0	0	0.445636	0
WBGene00007561	ALG Class 26G	C14A4.11, ccm-3		0	0	0	0	0	0	0	0		0	0	0	0	0	0	0	0
WBGene00007563	ALG Class 26G	C14A4.13		0	0	0.645272	0	0	0	0.379373	0.424445		0	0	0.58062	0.64957	0	5.18806	0.222818	0.180209
WBGene00007570	ALG Class 26G	C14A6.6		0	0	0	0	0	0	0	0		0	0	0	0	0	0	0	0
WBGene00007597	ALG Class 26G	C15A11.2		0	0	0	0	0	0	0	0.424445		0	0	0.38708	0.162393	0	0	0	0.360417
WBGene00007610	ALG Class 26G	C15H7.3		0	0	0.430181	0	0	0	0.948434	0.84889		0	0	1.35478	0.162393	0	0	0.668454	0.720835
WBGene00007611	ALG Class 26G	C15H7.4		0	0	0	0	0	0	0	0		0	0	0	0	0	0	0	0.180209
WBGene00007624	ALG Class 26G	C16C10.3, hrde-1		0	0	0	0	0	0	0	0		0	0	0.19354	0	0	0	0.222818	0
WBGene00007633	ALG Class 26G	C16D2.1		0	0	0	0	0	0	0	0.424445		0	0	0.38708	0	0	0	0	0
WBGene00007639	ALG Class 26G	C17D12.5		0	0	0.430181	0.537413	0	0	0.189687	0		0	0	0	0.487178	0	0	0.222818	0.540626
WBGene00007641	ALG Class 26G	C17E4.1		0	0	0	0.358275	0	0	0	0		0	0	0.77416	0	0	0	0	0
WBGene00007683	ALG Class 26G	C18E9.2		0	0	0	0	0	0	0	0		0	0	0	0	0	0	0	0
WBGene00007684	ALG Class 26G	C18E9.4		0	0	0	0.179138	0	0	0	0		0	0	0	0	0	0	0	0
WBGene00007688	ALG Class 26G	C18E9.8		0	0	0	0	0	0	0	0.212223		0	0	0.19354	0	0	0	0.222818	0.540626
WBGene00007696	ALG Class 26G	C24F3.1, tram-1		0	0	0.215091	0.358275	0	0	0.379373	0		0	0	0	0	0	0	0.222818	0
WBGene00007699	ALG Class 26G	C24H11.1		0	0	0.430181	0.179138	0	0	0	0.424445		0	0	0	0.162393	0	0	0	0
WBGene00007700	ALG Class 26G	C24H11.2		0	0	0	0.179138	0	0	0.189687	0		0	0	0	0.162393	0	0	0	0.180209
WBGene00007721	ALG Class 26G	C25D7.12		0	0	0	0	0	0	0	0		0	0	0	0	0	0	0	0
WBGene00007732	ALG Class 26G	C25G4.4, spe-44		0	0	0	0	0	0	0	0		0	0	0	0	0	0	0	0
WBGene00007733	ALG Class 26G	C25G4.6, smz-1		0	0	1.07545	1.79138	0	0	1.32781	0.424445		0	0	1.16124	1.94871	0	0	0.668454	1.26146
WBGene00007735	ALG Class 26G	C25G4.8		0	0	0.215091	0	0	0	0	0		0	0	0	0.162393	0	0	0.222818	0.360417
WBGene00007740	ALG Class 26G	C26C6.6		0	0	0.215091	0.537413	0	0	0.189687	0		0	0	0.19354	0.162393	0	0	0.222818	0.180209
WBGene00007763	ALG Class 26G	C27B7.6		0	0	0.215091	0.358275	0	0	0	0.212223		0	0	0.19354	0.162393	0	0	0	0.540626
WBGene00007778	ALG Class 26G	C27D8.2		0	0	0	0	0	0	0.189687	0.424445		0	0	0	0.162393	0	0	0	0.360417
WBGene00007791	ALG Class 26G	C28A5.6		0	0	0.430181	0	0	0	0	0		0	0	0.19354	0	0	0	0	0
WBGene00007863	ALG Class 26G	C32C4.3		0	0	0	0.179138	0	0	0.189687	0		0	0	0	0.324785	0	0	0	0
WBGene00007888	ALG Class 26G	C33A12.15, ttr-9		0	0	0	0	0	0	0	0.212223		0	0	0	0	0	0	0	0
WBGene00007923	ALG Class 26G	C34C12.4		0	0	0.215091	0	0	0	0	0		0	0	0	0.162393	0	0	0	0.180209
WBGene00007969	ALG Class 26G	acs-19, C36A4.9		0	0	0	0	0	0	0.56906	0		0	0	0	0	0	0	0	0.180209
WBGene00007977	ALG Class 26G	C36B1.10, gska-3		0	0	0.645272	0.537413	0	0	0.189687	0.636668		0	0	0.77416	0.811963	0	0	0.891272	0.360417
WBGene00007986	ALG Class 26G	C36F7.5		0	0	0	0	0	0	0	0		0	0	0	0	0	0	0	0
WBGene00007987	ALG Class 26G	C36H8.1		0	0	1.07545	0.358275	0	0	0.189687	0.636668		0	10.405	0.19354	0.162393	0	0	0.891272	0
WBGene00008001	ALG Class 26G	C38C10.3		0	0	1.72073	1.97051	4.64794	0	1.32781	1.06111		0	0	3.09664	0.974355	0	5.18806	0.891272	1.62188
WBGene00008019	ALG Class 26G	C38H2.2		0	0	0.215091	0	0	14.4709	0.189687	0		0	0	0	0.162393	0	0	0	0
WBGene00008053	ALG Class 26G	C41C4.8, cdc-48.2		0	0	0.215091	0	0	0	0	0.212223		0	0	0.19354	0	0	0	0.222818	0.180209
WBGene00008063	ALG Class 26G	C41G7.6, cylc-2		0	0	0.430181	0.358275	0	0	0.189687	0		0	0	0	0	0	0	0	0
WBGene00008074	ALG Class 26G	C43F9.6, nkb-2		0	0	0	0	0	0	0.189687	0		3.85773	0	0	0	0	0	0.222818	0
WBGene00008124	ALG Class 26G	C47A4.3		0	0	0	0	0	7.23544	0	0.212223		0	0	0	0	0	0	0	0.180209
WBGene00008125	ALG Class 26G	C47A4.5		0	0	0.860363	0.537413	0	7.23544	0.56906	0.636668		0	0	0.19354	0.162393	0	0	0.668454	0.540626
WBGene00008136	ALG Class 26G	C47D12.2		0	0	0	0	0	0	0.189687	0		0	0	0.19354	0	0	0	0	0
WBGene00008137	ALG Class 26G	C47D12.3, sfxn-1.4		0	0	0.645272	1.07483	0	0	0.189687	0.424445		0	0	0.19354	0.162393	0	0	0.445636	0
WBGene00008141	ALG Class 26G	C47E8.1		0	0	0.215091	0.358275	0	0	0	0.636668		0	0	0	0	0	0	0	0.180209
WBGene00008149	ALG Class 26G	C47E12.4, pyp-1		0	0	0	0.358275	0	0	0	0		0	0	0	0	0	0	0	0
WBGene00008153	ALG Class 26G	C47E12.10		0	0	0	0	0	0	0	0		0	0	0.19354	0	0	0	0	0
WBGene00008155	ALG Class 26G	C47E12.12		0	0	0	0	4.64794	0	0	0		0	0	0.19354	0	0	0	0	0
WBGene00008185	ALG Class 26G	best-10, C49A1.2		0	0	0	0	0	0	0	0		0	0	0	0	0	0	0	0
WBGene00008186	ALG Class 26G	best-11, C49A1.3		0	0	0	0	0	0	0	0		0	0	0	0.162393	0	0	0.222818	0
WBGene00008235	ALG Class 26G	C50F4.10		0	0	0	0	0	0	0	0		0	0	0	0	0	0	0.891272	0
WBGene00008259	ALG Class 26G	C52E4.7		0	0	0.215091	0	0	0	0	0.636668		0	0	0	0.162393	0	0	0.222818	0
WBGene00008272	ALG Class 26G	C53B4.2		0	0	0.215091	0.179138	0	0	0	0		0	0	0	0	0	0	0.222818	0
WBGene00008299	ALG Class 26G	C54D10.4		0	0	0	0.179138	0	0	0	0		0	0	0	0	0	0	0	0.180209
WBGene00008332	ALG Class 26G	C55A6.3		0	0	0	0.358275	0	0	0.379373	0		0	0	0.58062	0.487178	0	0	0.222818	0.180209
WBGene00008333	ALG Class 26G	C55A6.4		0	0	0	0	0	0	0	0		0	0	0	0.162393	0	5.18806	0	0
WBGene00008340	ALG Class 26G	C55A6.11		0	0	0	0	0	0	0	0		0	0	0	0	0	0	0	0
WBGene00008383	ALG Class 26G	D1081.5		0	0	1.07545	0.537413	0	0	0.189687	0.84889		0	0	0.9677	0.162393	0	5.18806	0.891272	0.720835
WBGene00008385	ALG Class 26G	D1081.7		0	0	0	0	0	0	0	0		0	0	0.19354	0	0	0	0	0
WBGene00008411	ALG Class 26G	D2030.1, mans-1		0	0	0	0	0	0	0	0		0	0	0	0	0	0	0.222818	0
WBGene00008422	ALG Class 26G	D2045.2		0	0	0	0	0	0	0	0		0	0	0	0	0	0	0	0
WBGene00008480	ALG Class 26G	E04D5.1, eif-2A		0	0	0	0	0	0	0	0		0	0	0	0	0	0	0	0
WBGene00008498	ALG Class 26G	F01D5.8		0	0	0	0	0	0	0	0		0	0	0	0	0	0	0	0
WBGene00008508	ALG Class 26G	F01G10.5		0	0	0	0.179138	0	7.23544	0	0		0	0	0	0.324785	0	0	0	0
WBGene00008514	ALG Class 26G	F02A9.4, mrpl-44		0	0	0	0.358275	0	0	0	0		0	0	0	0	0	0	0	0
WBGene00008532	ALG Class 26G	dpt-1, F02E9.9		0	0	0	0.179138	0	0	0.189687	0.212223		0	0	0.38708	0	0	0	0	0.360417
WBGene00008541	ALG Class 26G	F07A5.2		0	4.59547	0.645272	1.25396	0	0	0.758747	1.06111		0	0	0.58062	0.324785	4.77791	0	0.668454	0.360417
WBGene00008556	ALG Class 26G	F07D3.3		0	0	0	0	0	0	0.189687	0.212223		0	0	0	0	0	0	0.222818	0
WBGene00008561	ALG Class 26G	F07H5.10		0	0	0	0	0	0	0	0.212223		0	0	0	0.162393	0	0	0.222818	0
WBGene00008590	ALG Class 26G	F08H9.2		0	0	0.860363	0.358275	0	0	0.758747	1.06111		0	0	0.19354	0.487178	0	0	1.11409	1.08125
WBGene00008649	ALG Class 26G	F10D11.3		0	0	0	0	0	0	0.189687	0		0	0	0	0	4.77791	0	0	0
WBGene00008659	ALG Class 26G	clec-151, F10F2.7		0	0	0	0.179138	0	0	0	0		0	0	0	0	0	0	0	0
WBGene00008660	ALG Class 26G	clec-153, F10F2.8		0	0	0	0.179138	0	0	0	0		0	0	0.19354	0	0	0	0	0.180209
WBGene00008687	ALG Class 26G	F11A10.6		0	0	0	0	0	0	0	0		0	0	0	0	0	0	0.222818	0
WBGene00008724	ALG Class 26G	F13A7.1		0	0	0.215091	0.358275	0	0	0.56906	0		0	0	0.19354	0.64957	0	0	0.891272	0
WBGene00008725	ALG Class 26G	F13A7.7		0	0	0.215091	0	0	0	0	0		0	0	0	0	0	0	0	0
WBGene00008740	ALG Class 26G	F13D12.5		0	0	0	0	0	0	0	0		0	0	0	0	0	0	0	0
WBGene00008743	ALG Class 26G	F13D12.9		0	0	0.215091	0.358275	0	0	0.56906	0		0	0	0	0	9.55582	0	0	0.360417
WBGene00008754	ALG Class 26G	F13E9.5		0	0	0	0	0	0	0	0.212223		0	0	0	0	0	0	0	0.360417
WBGene00008772	ALG Class 26G	F13G11.2, irld-4		0	0	0	0	0	0	0	0		0	0	0	0	0	0	0	0
WBGene00008780	ALG Class 26G	F14B4.2, hxk-1		0	0	0	0	0	0	0	0		0	0	0	0	0	0	0	0
WBGene00008800	ALG Class 26G	F14E5.2		0	0	0	0	0	0	0	0		0	0	0	0	0	0	0	0
WBGene00008811	ALG Class 26G	F14F7.4		0	0	0	0	4.64794	0	0.189687	0.212223		0	0	0	0.487178	0	0	0	0.360417
WBGene00008832	ALG Class 26G	F14H8.1, obr-2		0	0	0	0	0	0	0.56906	0.212223		0	0	0.19354	0	0	0	0	0.180209
WBGene00008852	ALG Class 26G	F15C11.2, ubql-1		0	0	0	0	0	0	0	0		0	0	0	0	0	0	0	0.180209
WBGene00008854	ALG Class 26G	F15D3.4		0	0	0	0	0	0	0	0		0	0	0	0	0	0	0	0
WBGene00008871	ALG Class 26G	F15H10.4, tag-314		0	0	0	0	0	0	0	0		0	0	0.19354	0	0	0	0	0
WBGene00008874	ALG Class 26G	F15H10.7		0	0	0	0	0	0	0	0		0	0	0	0	0	0	0	0
WBGene00008878	ALG Class 26G	F16A11.3, ppfr-1		0	0	0.215091	0	0	0	0	0		0	0	0	0	0	0	0	0
WBGene00008912	ALG Class 26G	F17C8.7		0	0	0.430181	0.179138	0	0	0	0		0	0	0	0.162393	0	0	0	0
WBGene00008920	ALG Class 26G	eef-1G, F17C11.9		0	0	0	0	0	0	0	0.212223		0	0	0.58062	0	0	0	0	0.360417
WBGene00008935	ALG Class 26G	F18C12.4		0	0	0	0	0	0	0	0		0	0	0	0	0	0	0	0
WBGene00008948	ALG Class 26G	F19B6.1		0	0	0	0	0	0	0	0		0	0	0	0	0	0	0	0
WBGene00008950	ALG Class 26G	F19B6.4, wht-5		0	0	0.215091	0	0	0	0	0		0	0	0	0.162393	0	0	0	0
WBGene00009028	ALG Class 26G	F21H7.2		0	0	0	0.358275	0	0	0	0		0	0	0	0.324785	0	0	0	0
WBGene00009031	ALG Class 26G	F21H7.5		0	0	1.07545	0.358275	0	0	0.379373	0.212223		0	0	0.58062	0.64957	4.77791	5.18806	2.22818	0.180209
WBGene00009039	ALG Class 26G	F22B3.8		0	0	0	0	0	0	0	0		0	0	0.19354	0	0	0	0.222818	0
WBGene00009050	ALG Class 26G	F22D6.2		0	0	0	0.179138	0	0	0	0		0	0	0	0	0	0	0	0
WBGene00009051	ALG Class 26G	F22D6.4, nduf-6		0	0	0.430181	0	0	0	0.379373	0.424445		0	0	0	0.324785	0	0	0	0
WBGene00009054	ALG Class 26G	F22D6.9		0	0	0	0	0	0	0	0		0	0	0	0	0	0	0	0
WBGene00009075	ALG Class 26G	F23B2.7		0	0	0	0	0	0	0.189687	0		0	0	0.19354	0	0	0	0.222818	0
WBGene00009082	ALG Class 26G	dlat-1, F23B12.5		0	0	0	0	0	0	0	0		0	0	0	0	0	0	0	0
WBGene00009101	ALG Class 26G	F25B3.4		0	0	0.645272	0	0	0	0.189687	0.424445		0	0	0	0	0	10.3761	0.445636	0.180209
WBGene00009102	ALG Class 26G	F25B3.5		0	0	0.215091	0	0	0	0	0		0	0	0	0	0	0	0	0
WBGene00009112	ALG Class 26G	F25D7.2, tag-353		0	0	0	0	0	0	0	0		3.85773	0	0	0	0	0	0.222818	0
WBGene00009115	ALG Class 26G	F25F2.1		0	0	0	0	0	0	0	0.212223		0	0	0	0	0	0	0	0
WBGene00009122	ALG Class 26G	F25H2.11, tct-1		0	0	0	0	0	0	0	0		0	0	0	0	0	0	0	0
WBGene00009125	ALG Class 26G	F25H5.2		0	0	0	0	0	0	0	0.212223		0	0	0	0	0	0	0	0
WBGene00009126	ALG Class 26G	F25H5.3, pyk-1		0	0	0	0	0	0	0	0		0	0	0	0	0	0	0	0
WBGene00009129	ALG Class 26G	F25H5.7		0	0	0.430181	0.179138	0	0	0.189687	0.212223		0	0	0.38708	0.162393	0	0	0	0.180209
WBGene00009161	ALG Class 26G	cox-7C, F26E4.6		0	0	0.215091	0	0	0	0	0		0	0	0	0	0	0	0.222818	0
WBGene00009165	ALG Class 26G	F26E4.12, gpx-1		0	0	0	0	0	0	0	0.212223		0	0	0	0	0	0	0	0
WBGene00009185	ALG Class 26G	F27C8.5		0	0	0	0.71655	0	0	0	0.212223		0	5.20251	0.38708	0.162393	0	0	0.445636	0
WBGene00009187	ALG Class 26G	F27D4.1		0	0	0	0.179138	0	0	0	0		0	0	0	0.324785	0	0	0	0
WBGene00009193	ALG Class 26G	F27E5.3		0	0	0	0	0	0	0	0		0	0	0	0	0	0	0	0.180209
WBGene00009238	ALG Class 26G	F28H7.4, selt-1.2		0	0	0	0	0	0	0	0		0	0	0	0	0	0	0	0.180209
WBGene00009239	ALG Class 26G	F28H7.6, irld-6		0	4.59547	1.50563	0.71655	0	0	0.56906	1.69778		3.85773	0	0.9677	0.811963	0	0	1.55973	0.540626
WBGene00009250	ALG Class 26G	F29D10.1		0	0	0	0	0	0	0.379373	0		0	0	0	0	0	0	0	0
WBGene00009254	ALG Class 26G	capg-1, F29D11.2		0	0	0	0	0	0	0	0		0	0	0.19354	0	0	0	0	0
WBGene00009269	ALG Class 26G	F30A10.12		0	0	0	0	0	0	0	0		0	0	0	0	0	0	0	0
WBGene00009274	ALG Class 26G	F30F8.5		0	0	0	0	0	0	0	0		0	0	0	0	0	0	0	0
WBGene00009307	ALG Class 26G	F32A11.1		0	0	0	0	0	0	0	0		0	0	0	0	0	0	0.222818	0
WBGene00009308	ALG Class 26G	F32A11.3		0	0	0	0	0	0	0.189687	0		0	0	0	0	0	0	0	0
WBGene00009313	ALG Class 26G	F32B4.2		0	0	0.215091	0.358275	0	0	0.189687	0		0	10.405	0.38708	0	0	0	0.445636	0
WBGene00009321	ALG Class 26G	F32B6.4		0	0	0.215091	0.71655	0	7.23544	0	0		0	0	0.38708	0.324785	0	0	0	0.901043
WBGene00009344	ALG Class 26G	F32H2.7		0	0	0.645272	0.537413	0	0	0.379373	0.84889		11.5732	0	0.38708	0	0	5.18806	0	0.540626
WBGene00009353	ALG Class 26G	F33A8.5, sdhd-1		0	0	0	0	0	0	0	0		0	0	0	0.162393	0	0	0	0
WBGene00009377	ALG Class 26G	F34D10.8		0	0	0.215091	0	0	0	0.379373	0.212223		0	0	0.38708	0	0	0	0	0
WBGene00009390	ALG Class 26G	F35C5.1		0	0	0	0	0	0	0.189687	0		0	0	0	0	0	0	0	0
WBGene00009401	ALG Class 26G	F35C11.2		0	0	0.430181	0.179138	0	0	0.189687	0		0	5.20251	0.19354	0.324785	0	0	0.222818	0.180209
WBGene00009404	ALG Class 26G	F35C11.5		0	0	0	0	0	0	0	0		0	0	0	0	0	0	0	0
WBGene00009416	ALG Class 26G	F35E2.9		0	0	0.215091	0.71655	0	0	0	0		0	0	0	0	0	0	0.222818	0.180209
WBGene00009446	ALG Class 26G	F35H8.1		0	0	0.645272	0	0	0	0.189687	0.212223		0	0	0	0	0	0	0	0.360417
WBGene00009454	ALG Class 26G	F36A2.7		0	0	0	0.537413	0	0	0.189687	0		0	0	0	0	0	0	0	0
WBGene00009457	ALG Class 26G	F36A2.10		0	0	1.07545	1.25396	0	0	1.32781	1.69778		0	0	2.12894	0.64957	0	0	1.33691	0.720835
WBGene00009458	ALG Class 26G	F36A2.11		0	0	0.215091	0.358275	0	0	0.189687	0.212223		0	0	0.38708	0.162393	0	0	0.222818	0.360417
WBGene00009459	ALG Class 26G	F36A2.12		0	0	0.215091	0.179138	0	0	0.56906	0.636668		0	0	0.38708	0.162393	0	0	0	0
WBGene00009463	ALG Class 26G	F36D1.4		0	0	0	0	0	0	0	0		0	0	0	0	0	0	0.222818	0
WBGene00009470	ALG Class 26G	F36D3.4		0	0	0.215091	0	0	0	0	0		0	0	0	0	0	0	0.445636	0
WBGene00009491	ALG Class 26G	F36G9.15		0	0	0	0	0	0	0	0		0	0	0	0	0	0	0	0
WBGene00009492	ALG Class 26G	F36H1.3		0	4.59547	0.430181	0.179138	0	0	0	0		0	0	0.19354	0.162393	0	5.18806	0.668454	0.540626
WBGene00009501	ALG Class 26G	F37A8.1		0	0	0	0	0	0	0	0		0	0	0	0	0	0	0	0
WBGene00009513	ALG Class 26G	F37H8.4, sfxn-1.2		0	0	1.29054	0.537413	0	0	0.189687	0.84889		0	0	0.19354	0.324785	0	0	0.445636	0.180209
WBGene00009542	ALG Class 26G	copb-2, F38E11.5		0	0	0.215091	0.179138	0	0	0	0		0	0	0.38708	0	0	0	0.222818	0
WBGene00009548	ALG Class 26G	F38H4.4		0	0	0	0.179138	4.64794	0	0	0.424445		0	0	0	0.487178	0	0	0	0.180209
WBGene00009550	ALG Class 26G	F38H4.6		0	4.59547	0.430181	0.358275	0	0	0.56906	0		0	0	0	0	0	5.18806	0	0
WBGene00009581	ALG Class 26G	F40F9.3		0	0	0.215091	0.179138	0	0	0.189687	0		0	0	0	0	0	0	0.222818	0
WBGene00009583	ALG Class 26G	aagr-3, F40F9.6		0	0	0	0	0	0	0	0		0	0	0	0	0	0	0	0
WBGene00009589	ALG Class 26G	F40F11.4		0	0	0.215091	0	0	0	0	0		0	0	0	0	0	0	0	0
WBGene00009605	ALG Class 26G	F40G12.10		0	0	0.860363	0.71655	0	0	1.70718	0		0	0	0.77416	1.13675	0	0	1.78254	1.26146
WBGene00009641	ALG Class 26G	F42G4.2		0	0	0	0	0	0	0	0		0	0	0	0	0	0	0	0
WBGene00009643	ALG Class 26G	F42G4.6		0	0	0.645272	0.895688	0	0	0.56906	0.636668		0	0	0.58062	0.487178	0	5.18806	0.222818	0.901043
WBGene00009680	ALG Class 26G	F44D12.3, msd-1		0	0	0.860363	0.71655	4.64794	0	0.948434	0		0	0	0.58062	0.64957	0	0	0.445636	0.720835
WBGene00009682	ALG Class 26G	F44D12.5, msd-2		0	0	0.215091	0.358275	0	0	0.189687	0		0	0	0.19354	0.162393	0	0	0	0.180209
WBGene00009683	ALG Class 26G	F44D12.6		0	0	0	0.179138	0	0	0	0.212223		0	0	0	0.162393	0	0	0.222818	0
WBGene00009684	ALG Class 26G	F44D12.7, msd-3		0	0	0.860363	0.71655	4.64794	0	0.948434	0		0	0	0.58062	0.64957	0	0	0.445636	0.720835
WBGene00009685	ALG Class 26G	F44D12.8		0	0	0.215091	0	0	0	0	0.212223		0	0	0.38708	0	0	0	0.668454	0.360417
WBGene00009688	ALG Class 26G	F44E5.1		0	0	0	0.179138	4.64794	0	0	0.212223		0	0	0	0	0	5.18806	0	0
WBGene00009702	ALG Class 26G	F44F4.3		0	0	0	0	0	0	0	0		0	0	0	0	0	0	0	0
WBGene00009705	ALG Class 26G	F44F4.10		0	0	0.430181	0	4.64794	0	0	0.424445		0	0	0.19354	0.487178	0	0	0	0.180209
WBGene00009708	ALG Class 26G	F44G3.7		0	0	0	0	0	0	0.189687	0.212223		0	0	0	0	0	0	0	0.180209
WBGene00009714	ALG Class 26G	F44G4.5		0	0	0.215091	0	0	7.23544	0.379373	0.212223		0	0	0	0	0	0	0.445636	0
WBGene00009732	ALG Class 26G	cope-1, F45G2.4		0	0	0	0	0	0	0	0		0	0	0	0	0	0	0	0
WBGene00009754	ALG Class 26G	F46A9.1		0	0	0	0	0	0	0	0		0	0	0	0	0	0	0	0
WBGene00009759	ALG Class 26G	F46B3.4, ttr-12		0	0	0.215091	0	0	0	0	0		0	0	0	0	0	0	0	0
WBGene00009782	ALG Class 26G	F46C5.7		0	0	0.215091	0	0	0	0	0		0	0	0	0	0	0	0	0
WBGene00009783	ALG Class 26G	F46C5.8, rer-1		0	0	0	0	0	0	0	0		0	0	0	0	0	0	0	0
WBGene00009829	ALG Class 26G	F47G9.1, tmed-10		0	0	0.215091	0	0	0	0	0		0	0	0	0	0	0	0	0
WBGene00009880	ALG Class 26G	F49C12.11		0	0	0.215091	0	0	0	0	0		0	0	0	0	0	0	0	0
WBGene00009884	ALG Class 26G	F49C12.15		0	0	0	0.179138	0	0	0	0		0	0	0	0	0	0	0	0
WBGene00009938	ALG Class 26G	F52F12.5		0	4.59547	0.645272	0.537413	0	0	0	0.424445		0	0	0	0.324785	0	0	0	0
WBGene00009941	ALG Class 26G	F52F12.8		0	0	0.215091	0.179138	0	0	0.948434	0		0	0	0.58062	0	0	0	0	0.180209
WBGene00009956	ALG Class 26G	F53B2.5		0	4.59547	0.430181	1.07483	0	0	0	0		0	0	0.58062	0.487178	0	0	0.222818	0.360417
WBGene00009959	ALG Class 26G	F53B6.4		0	0	0.215091	0.179138	0	0	0.189687	0.424445		3.85773	0	0.38708	0	0	5.18806	0.668454	0
WBGene00009962	ALG Class 26G	F53B6.7		0	0	0	0	0	0	0	0		0	5.20251	0.38708	0	0	0	0	0
WBGene00010014	ALG Class 26G	F54B3.2		0	0	0.215091	0	0	0	0.379373	0.212223		0	0	0	0	0	0	0	0
WBGene00010035	ALG Class 26G	F54C8.1		0	0	0	0	0	0	0.379373	0.424445		0	0	0.38708	0.162393	0	0	0.222818	0.180209
WBGene00010040	ALG Class 26G	F54C8.7		0	0	0	0	0	0	0	0		0	0	0	0	0	0	0.222818	0
WBGene00010046	ALG Class 26G	F54D1.1		0	0	0.215091	0.179138	0	0	0	0		0	0	0.19354	0.487178	0	0	0.222818	0.540626
WBGene00010061	ALG Class 26G	F54E12.2		0	0	0	0	0	0	0	0		0	0	0	0	0	0	0	0
WBGene00010079	ALG Class 26G	F55A11.6		0	0	0	0	0	0	0	0		0	0	0	0	0	0	0	0
WBGene00010082	ALG Class 26G	F55A11.11		0	0	0	0	0	0	0	0.212223		0	0	0	0	0	0	0.222818	0.180209
WBGene00010091	ALG Class 26G	F55C5.1, ssp-35		0	0	0.645272	0.71655	0	0	0.379373	0		0	0	0.19354	0.64957	0	5.18806	0	0.720835
WBGene00010092	ALG Class 26G	F55C5.2		0	0	0	0	0	0	0	0		0	0	0	0	0	0	0	0
WBGene00010097	ALG Class 26G	F55C5.8, srpa-68		0	0	0	0	0	0	0.189687	0		0	0	0.19354	0	0	0	0	0
WBGene00010114	ALG Class 26G	F55D12.6		0	0	0	0	0	0	0	0.212223		0	0	0.19354	0	0	0	0	0.360417
WBGene00010130	ALG Class 26G	F55H2.2, vha-14		0	0	0	0	0	0	0	0		0	0	0	0	0	0	0	0
WBGene00010136	ALG Class 26G	F55H12.5		0	0	0	0	0	0	0	0.212223		0	0	0	0	0	0	0	0
WBGene00010147	ALG Class 26G	F56D5.2		0	4.59547	0.645272	0	0	0	0	0		0	0	0.58062	0.324785	4.77791	0	0	0
WBGene00010155	ALG Class 26G	F56F3.4		0	0	0.645272	0	0	0	0	0.212223		0	0	0	0.162393	0	0	0.222818	0
WBGene00010175	ALG Class 26G	F56H11.2		0	0	0	0	0	0	0	0		0	0	0	0	0	0	0	0
WBGene00010181	ALG Class 26G	F57A8.6		0	0	0	0.179138	0	0	0	0		0	0	0	0	0	0	0	0.180209
WBGene00010241	ALG Class 26G	F58D2.2		0	0	0.645272	0.358275	0	0	0	0		0	0	0.19354	0.162393	0	0	0.891272	0.540626
WBGene00010246	ALG Class 26G	F58D5.7		0	0	0.215091	0	0	0	0.379373	0.212223		0	0	0.19354	0	0	0	0.222818	0.180209
WBGene00010265	ALG Class 26G	F58G1.3		0	0	0.215091	0.179138	0	0	0.189687	0		0	0	0.9677	0.162393	0	0	0.445636	0
WBGene00010284	ALG Class 26G	aman-2, F58H1.1		0	0	0	0	0	0	0	0		0	0	0	0	0	0	0	0
WBGene00010289	ALG Class 26G	F58H1.6		0	0	0	0	0	0	0	0		0	0	0	0	0	0	0	0
WBGene00010300	ALG Class 26G	F59A1.15		0	0	0	0	0	0	0	0		0	0	0	0	0	0	0	0.540626
WBGene00010309	ALG Class 26G	F59B2.5, rpn-6.2		0	0	0.430181	0.358275	0	0	0	0.636668		0	0	0.58062	0	0	0	0.445636	0
WBGene00010317	ALG Class 26G	F59B8.2, idh-1		0	0	0	0	0	0	0	0		0	0	0.19354	0.162393	0	0	0	0
WBGene00010324	ALG Class 26G	F59C6.3		0	0	0	0	0	0	0	0.212223		0	0	0.58062	0	0	0	0	0.180209
WBGene00010326	ALG Class 26G	F59C6.5		0	0	0	0	0	0	0.189687	0		0	0	0	0	0	0	0	0
WBGene00010333	ALG Class 26G	copz-1, F59E10.3		0	0	0	0	0	0	0	0		0	0	0	0	0	0	0	0
WBGene00010366	ALG Class 26G	H05L14.1		0	0	0	0	0	0	0	0		0	0	0	0	0	0	0	0
WBGene00010377	ALG Class 26G	H12D21.1, nspa-1		0	0	0	0	0	0	0.189687	0		0	0	0	0	0	0	0	0
WBGene00010378	ALG Class 26G	H12D21.2		0	0	0.215091	0	0	0	0	0		0	0	0	0.162393	0	0	0.222818	0.180209
WBGene00010381	ALG Class 26G	H12D21.5		0	0	0	0	0	0	0	0		0	0	0	0	0	0	0	0
WBGene00010405	ALG Class 26G	erfa-3, H19N07.1		0	0	0.430181	0.179138	0	0	0.189687	0		0	0	0.38708	0	0	0	0	0.360417
WBGene00010419	ALG Class 26G	atp-1, H28O16.1		0	0	0	0	0	0	0	0		0	0	0.19354	0	0	0	0	0.180209
WBGene00010460	ALG Class 26G	clec-142, K01C8.8		0	0	0	0	0	0	0	0.212223		0	0	0	0.162393	0	0	0	0
WBGene00010485	ALG Class 26G	ant-1.3, K01H12.2		0	0	0.645272	0.358275	0	0	0	0		0	0	0.19354	0.162393	0	0	0	0
WBGene00010491	ALG Class 26G	K02B7.3		0	0	0	0	0	0	0	0.424445		0	0	0	0	0	0	0	0
WBGene00010496	ALG Class 26G	K02B12.3, sec-12		0	0	0	0	0	0	0	0		0	0	0	0	0	0	0	0
WBGene00010510	ALG Class 26G	ent-3, K02E11.1		0	0	0.430181	0.179138	0	0	0	0		0	0	0	0	0	0	0	0.360417
WBGene00010544	ALG Class 26G	K03H1.9		0	0	0.215091	0	0	0	0.189687	0		0	0	0	0	0	0	0	0
WBGene00010547	ALG Class 26G	K03H1.12		0	0	0.215091	0.179138	0	0	0.56906	0		0	0	0.19354	0.487178	0	0	0	0.180209
WBGene00010574	ALG Class 26G	K04H4.5		0	0	0	0.537413	0	0	0.56906	0		0	0	0	0.324785	0	0	0.222818	0.540626
WBGene00010611	ALG Class 26G	K07A1.4		0	0	0	0	0	0	0	0		0	0	0.19354	0	0	0	0	0.180209
WBGene00010631	ALG Class 26G	cash-1, K07C5.8		0	0	0	0	0	0	0	0		0	0	0	0.162393	0	0	0	0
WBGene00010633	ALG Class 26G	K07F5.5, nspd-2		0	0	0	0.179138	0	0	0.379373	0		0	0	0.77416	0	0	0	0	0.180209
WBGene00010634	ALG Class 26G	K07F5.6		0	0	0	0.179138	0	0	0	0		0	0	0.19354	0	0	0	0.222818	0.180209
WBGene00010651	ALG Class 26G	K08C9.2		0	4.59547	0.215091	0.179138	0	0	0.189687	0.636668		0	0	0.38708	0.162393	0	0	0.445636	0.360417
WBGene00010672	ALG Class 26G	K08E7.4		0	0	0	0	0	0	0	0		0	0	0	0	0	0	0	0
WBGene00010678	ALG Class 26G	K08F4.3		0	0	0	0.358275	0	0	0	0		0	0	0.58062	0.324785	0	0	0	0
WBGene00010679	ALG Class 26G	K08F4.5		0	0	1.29054	0.179138	0	7.23544	0.56906	0.636668		3.85773	0	1.35478	0	0	0	0.222818	0
WBGene00010682	ALG Class 26G	K08F8.5		0	0	0.215091	0	0	0	0.189687	0.424445		0	0	0.19354	0	0	0	0.445636	0
WBGene00010685	ALG Class 26G	aipl-1, K08F9.2		0	0	0	0	0	0	0	0.424445		0	0	0	0	0	0	0	0.180209
WBGene00010712	ALG Class 26G	K09B11.5		0	0	0	0	0	0	0	0		0	0	0	0	0	0	0	0
WBGene00010719	ALG Class 26G	K09E4.1		0	0	0	0.179138	0	0	0.189687	0		0	0	0.19354	0	0	0	0	0.540626
WBGene00010728	ALG Class 26G	K09G1.2		0	4.59547	0.215091	0.895688	0	0	0.189687	0.636668		0	0	0	0.162393	0	0	0	0.180209
WBGene00010734	ALG Class 26G	K10C8.1, parn-1		0	0	0	0	0	0	0	0		0	0	0	0	0	0	0	0
WBGene00010763	ALG Class 26G	K10H10.7		0	0	0.430181	0	0	0	0.56906	0		0	0	0	0	0	0	0	0
WBGene00010779	ALG Class 26G	K11H3.2		0	0	0	0.537413	0	0	0.189687	0.212223		0	0	0.58062	0.324785	0	0	0	0.180209
WBGene00010871	ALG Class 26G	M05B5.3		0	0	0	0.537413	0	0	0.189687	0		0	0	0.19354	0	0	0	0.222818	0
WBGene00010874	ALG Class 26G	M05D6.1		0	0	0.215091	0	0	0	0	0.636668		0	0	0	0	0	0	0	0.360417
WBGene00010876	ALG Class 26G	M05D6.3		0	0	0.430181	0.179138	0	0	0.189687	0		0	5.20251	0.19354	0.324785	0	0	0.222818	0.180209
WBGene00010900	ALG Class 26G	M28.9		0	0	0	0	0	0	0	0		0	0	0	0	0	0	0	0.180209
WBGene00010906	ALG Class 26G	M88.3		0	0	0.215091	0	0	0	0.189687	0		0	0	0.19354	0	0	0	0	0
WBGene00010915	ALG Class 26G	M110.7		0	0	0	0.179138	0	0	0	0		0	0	0	0.162393	0	0	0	0
WBGene00010920	ALG Class 26G	M117.4		0	0	0	0.358275	0	0	0	0.212223		0	0	0.58062	0.487178	0	0	0.222818	0.540626
WBGene00010943	ALG Class 26G	M176.4		0	0	0	0	0	0	0	0		0	0	0	0	0	0	0	0
WBGene00010959	ALG Class 26G	MTCE.11, nduo-1		0	0	0	0	0	0	0	0		0	0	0	0	0	0	0	0
WBGene00010961	ALG Class 26G	MTCE.16, nduo-2		0	0	0	0	0	0	0	0		0	0	0	0	0	0	0	0
WBGene00010963	ALG Class 26G	MTCE.25, nduo-4		0	0	0	0.179138	0	0	0	0		0	0	0	0	0	0	0	0
WBGene00010964	ALG Class 26G	ctc-1, MTCE.26		0	0	0	0	0	0	0	0		0	0	0	0	0	0	0	0
WBGene00010966	ALG Class 26G	MTCE.34, nduo-3		0	0	0	0	0	0	0	0		0	0	0	0	0	0	0	0
WBGene00010967	ALG Class 26G	MTCE.35, nduo-5		0	0	0	0	0	0	0	0		0	0	0	0	0	0	0	0
WBGene00010980	ALG Class 26G	R02D5.7		0	0	0	0	0	0	0.189687	0		0	0	0	0	0	0	0	0
WBGene00010990	ALG Class 26G	R03D7.4, tceb-3		0	0	0	0	0	0	0.379373	0		0	0	0	0	0	0	0	0
WBGene00010991	ALG Class 26G	R03D7.5		0	0	0	0	0	0	0	0		0	0	0	0	0	0	0	0
WBGene00010992	ALG Class 26G	R03D7.8		0	0	0	0.179138	0	0	0	0.424445		0	0	0	0	0	0	0	0.360417
WBGene00011001	ALG Class 26G	R04B5.1		0	0	0.215091	0.179138	0	0	0	0		0	0	0.19354	0.162393	0	0	0	0
WBGene00011008	ALG Class 26G	R04B5.11		0	0	0	0	0	0	0.379373	0		0	0	0	0.162393	0	0	0	0.360417
WBGene00011015	ALG Class 26G	R04F11.2		0	0	0.215091	0	0	0	0	0		0	0	0	0	0	0	0	0
WBGene00011027	ALG Class 26G	R05D7.2		0	0	0	0	4.64794	0	0	0		0	0	0	0.162393	0	0	0.445636	0
WBGene00011039	ALG Class 26G	R05H5.4		0	0	0	0	0	0	0.56906	0		0	0	0.19354	0	0	0	0	0
WBGene00011040	ALG Class 26G	arv-1, R05H5.5		0	0	0	0	0	0	0	0		0	0	0.19354	0	0	0	0	0
WBGene00011061	ALG Class 26G	R06C7.1, wago-1		0	0	0	0	0	0	0	0		0	0	0	0	0	0	0	0
WBGene00011110	ALG Class 26G	prdx-3, R07E5.2		0	0	0	0	0	0	0.189687	0		0	0	0	0	0	0	0	0
WBGene00011114	ALG Class 26G	R07E5.6		0	4.59547	0	0.179138	0	0	0.189687	0.212223		0	0	0.19354	0.162393	0	0	0	0.180209
WBGene00011120	ALG Class 26G	R07E5.15		0	0	0	0.179138	0	0	0	0		0	0	0	0	0	0	0	0
WBGene00011133	ALG Class 26G	R08A2.2		0	0	0.645272	0.358275	4.64794	0	0.56906	0.424445		0	0	0	0.64957	0	0	0.222818	1.26146
WBGene00011134	ALG Class 26G	R08A2.3, ssp-33		0	0	0	0.179138	0	0	0.189687	0		0	0	0	0.324785	0	0	0	0.180209
WBGene00011155	ALG Class 26G	R09B3.2, rbm-3.1		0	0	0.645272	0.537413	0	0	0.56906	0.212223		0	0	0.19354	0.162393	0	0	0.891272	0.180209
WBGene00011156	ALG Class 26G	R09B3.3, rbm-3.2		0	0	0.645272	0.358275	9.29587	14.4709	0.758747	0.636668		3.85773	0	0.38708	0.162393	0	5.18806	0	0.360417
WBGene00011171	ALG Class 26G	R09E10.1		0	0	0	0	0	0	0.379373	0		0	0	0	0.162393	0	0	0	0
WBGene00011176	ALG Class 26G	R09E10.6		0	0	0	0	0	0	0	0		0	0	0	0	0	0	0	0
WBGene00011191	ALG Class 26G	R10D12.10		0	0	0.215091	0	0	0	0.189687	0		0	0	0.19354	0	0	0	0	0
WBGene00011200	ALG Class 26G	R10E4.3		0	0	0.215091	0	0	0	0	0		0	0	0.19354	0.324785	0	0	0	0.180209
WBGene00011214	ALG Class 26G	R10E9.2		0	0	0	0	0	0	0.56906	0.212223		3.85773	0	0	0	4.77791	0	0.668454	0
WBGene00011215	ALG Class 26G	R10E9.3		0	0	0.215091	0	0	0	0	0		0	0	0.19354	0	0	0	0.222818	0
WBGene00011241	ALG Class 26G	mpz-5, R11A8.8		0	0	0.645272	0.895688	0	0	0.56906	0.212223		0	0	0.9677	0.324785	0	0	0.668454	0.360417
WBGene00011260	ALG Class 26G	cnnm-5, R13G10.4		0	0	0.430181	0.358275	0	0	0.758747	0.424445		0	0	0.38708	0.974355	4.77791	5.18806	0.668454	0.540626
WBGene00011273	ALG Class 26G	R53.4		0	0	0	0	0	0	0	0		0	0	0.38708	0	0	0	0	0
WBGene00011290	ALG Class 26G	R102.3		0	0	0.215091	0	0	0	0	0		0	0	0	0	0	0	0	0
WBGene00011297	ALG Class 26G	R102.10		0	0	0	0	0	0	0	0.212223		0	0	0	0	0	0	0	0
WBGene00011322	ALG Class 26G	irld-14, T01C3.5		0	0	0.430181	0.358275	0	0	0.189687	0.212223		0	0	0.38708	0	0	0	0	0
WBGene00011329	ALG Class 26G	T01D3.5, zipt-9		0	0	0	0	0	0	0	0		0	0	0.19354	0	0	0	0	0
WBGene00011351	ALG Class 26G	T01H3.5		0	0	0.215091	0.179138	0	0	0.948434	0.424445		0	0	0.38708	0.487178	0	0	0.222818	0.720835
WBGene00011401	ALG Class 26G	T03F6.6		0	0	0.215091	0	0	0	0	0		0	0	0	0	0	0	0.222818	0
WBGene00011414	ALG Class 26G	T04A8.13		0	0	0	0	0	0	0	0.212223		0	0	0	0	0	0	0.891272	0
WBGene00011425	ALG Class 26G	T04B2.7		0	0	0	0	0	0	0	0.212223		0	0	0.58062	0	0	0	0	0
WBGene00011438	ALG Class 26G	T04F3.3		0	0	0.215091	0.358275	0	0	0	0		0	0	0.19354	0.324785	0	0	0.445636	0.360417
WBGene00011466	ALG Class 26G	T05C12.1		0	0	0.215091	0.179138	0	0	0	0.212223		0	0	0.19354	0.162393	0	5.18806	0	0
WBGene00011467	ALG Class 26G	decr-1.3, T05C12.3		0	0	0	0	0	0	0.189687	0		0	0	0.19354	0	0	0	0	0.180209
WBGene00011469	ALG Class 26G	dylt-3, T05C12.5		0	0	0.430181	0	0	0	0	0.424445		0	0	0.38708	0	0	0	0	0
WBGene00011472	ALG Class 26G	T05C12.9		0	0	0.215091	0	0	0	0	0		0	0	0.19354	0	0	0	0	0
WBGene00011480	ALG Class 26G	enpl-1, T05E11.3		0	0	0	0	0	0	0	0.212223		0	0	0	0	0	0	0	0.180209
WBGene00011481	ALG Class 26G	imp-2, T05E11.5		0	0	0	0	0	0	0.189687	0		0	0	0	0.162393	0	0	0	0
WBGene00011488	ALG Class 26G	nra-2, T05F1.1		0	0	0	0	0	0	0	0		0	0	0	0.162393	0	0	0	0
WBGene00011491	ALG Class 26G	T05F1.5		0	0	0.215091	0	0	0	0	0		0	0	0	0.162393	0	0	0	0
WBGene00011493	ALG Class 26G	T05F1.8		0	0	0.215091	0	0	0	0	0		0	0	0	0.162393	0	0	0	0
WBGene00011499	ALG Class 26G	T05G5.4		0	0	0.215091	0.358275	0	0	0.189687	0		0	0	0	0	0	0	0.445636	0.720835
WBGene00011510	ALG Class 26G	pdha-1, T05H10.6		0	0	0	0	0	0	0	0		0	0	0	0	0	0	0	0
WBGene00011527	ALG Class 26G	cchl-1, T06D8.6		0	0	0	0	0	0	0	0		0	0	0	0	0	0	0	0
WBGene00011529	ALG Class 26G	T06D8.9		0	0	0	0	0	0	0	0		0	0	0	0	0	0	0	0.360417
WBGene00011533	ALG Class 26G	T06E4.5		0	0	0	0	0	0	0.189687	0		0	0	0	0	0	0	0	0
WBGene00011587	ALG Class 26G	anp-1, T07F10.1		0	0	0.430181	0	0	0	0	0		0	0	0	0.162393	0	0	0.222818	0
WBGene00011638	ALG Class 26G	ostb-1, T09A5.11		0	0	0.430181	0	0	0	0	0.212223		0	0	0	0	0	0	0	0
WBGene00011749	ALG Class 26G	ssp-36, T13F2.12		0	0	0	0	0	0	0	0		0	0	0	0	0	0	0	0.180209
WBGene00011775	ALG Class 26G	copg-1, T14G10.5		0	0	0	0	0	0	0	0		0	0	0.19354	0	0	0	0	0
WBGene00011777	ALG Class 26G	T14G10.8		0	0	0	0.179138	0	0	0	0		0	0	0	0.162393	0	0	0	0.180209
WBGene00011795	ALG Class 26G	T16A9.5		0	0	0.215091	0	0	0	0	0		0	0	0.19354	0.162393	0	0	0	0
WBGene00011808	ALG Class 26G	T16G12.7		0	0	0	0.71655	4.64794	0	0.189687	0.212223		0	0	0.19354	0.487178	0	0	0.445636	0
WBGene00011835	ALG Class 26G	pgap-1, T19B10.8		0	0	0.215091	0	0	0	0	0		0	0	0	0	0	0	0.222818	0
WBGene00011867	ALG Class 26G	chc-1, T20G5.1		0	0	0.430181	0	0	0	0	0		0	0	0	0	0	0	0	0
WBGene00011884	ALG Class 26G	enol-1, T21B10.2		0	0	0	0	0	0	0	0		0	0	0	0	0	0	0	0
WBGene00011892	ALG Class 26G	erh-1, T21C9.4		0	0	0	0	0	0	0.189687	0.212223		0	0	0.19354	0	0	0	0.445636	0.720835
WBGene00011900	ALG Class 26G	T21C12.4		0	0	0	0	0	0	0	0		0	0	0	0	0	0	0	0
WBGene00011909	ALG Class 26G	T22A3.6		0	0	0	0	0	0	0	0		0	0	0	0	0	0	0	0
WBGene00011910	ALG Class 26G	alg-3, T22B3.2		0	0	0	0	0	0	0	0		0	0	0.38708	0	0	0	0.445636	0.180209
WBGene00011911	ALG Class 26G	T22B3.3		0	0	0	0	0	0	0	0		0	0	0.19354	0.162393	0	0	0	0
WBGene00011919	ALG Class 26G	T22C1.9		0	0	0	0.179138	0	0	0	0		0	0	0	0	0	0	0	0.360417
WBGene00011951	ALG Class 26G	T23F6.3		0	4.59547	0.215091	0.179138	0	0	0.379373	0		0	0	0	0.162393	0	5.18806	0	0
WBGene00011954	ALG Class 26G	T23F11.2		0	0	0	0.179138	0	0	0	0		0	0	0	0	0	0	0	0
WBGene00011968	ALG Class 26G	T23G11.1		0	0	0.215091	0.179138	0	0	0.379373	0		0	0	1.16124	0.324785	0	0	0	0.360417
WBGene00012010	ALG Class 26G	T25B9.4		0	0	0.430181	0	0	0	0.758747	0		0	0	0.19354	0.162393	0	0	0.445636	0
WBGene00012012	ALG Class 26G	T25B9.6		0	0	0.430181	0	0	0	0	0		0	0	0.19354	0.162393	0	0	0.222818	0.360417
WBGene00012087	ALG Class 26G	T27E7.1		0	4.59547	1.29054	0.71655	0	0	0.379373	0.636668		7.71546	0	1.16124	0.487178	0	0	1.33691	0.360417
WBGene00012094	ALG Class 26G	T27E9.2		0	0	0	0	0	0	0	0		0	0	0	0	0	0	0	0
WBGene00012102	ALG Class 26G	T27F6.1		0	0	0	0	0	0	0.379373	0		0	0	0.19354	0	0	0	0	0
WBGene00012120	ALG Class 26G	T28C6.5		0	0	0.215091	0.179138	4.64794	0	0.189687	0.424445		0	0	0.38708	0.162393	0	0	0.445636	0.540626
WBGene00012138	ALG Class 26G	T28F4.3		0	0	0.215091	0.71655	0	0	0.379373	0		0	0	1.35478	0.162393	0	5.18806	0.668454	0.360417
WBGene00012156	ALG Class 26G	ebp-2, VW02B12L.3		0	0	0	0	0	0	0.379373	0.212223		0	10.405	0	0.162393	0	0	0.222818	0
WBGene00012169	ALG Class 26G	ttbk-4, W01B6.2		0	0	0.430181	0.179138	0	0	0.379373	0.84889		0	0	0.19354	0.811963	0	0	1.11409	0.180209
WBGene00012173	ALG Class 26G	W01B6.6		0	0	0	0	0	0	0	0		0	0	0	0	0	0	0	0.360417
WBGene00012177	ALG Class 26G	decr-1.2, W01C9.4		0	0	0	0	0	0	0	0		0	0	0	0	0	0	0	0
WBGene00012180	ALG Class 26G	W01D2.3		0	0	0.215091	0	0	0	0	0		0	0	0.58062	0	0	0	0.222818	0
WBGene00012191	ALG Class 26G	W02A2.8		0	0	0.215091	0.537413	0	0	0	0.212223		0	0	0.38708	0.162393	0	0	0.222818	0.360417
WBGene00012207	ALG Class 26G	W02B12.12		0	0	0	0	0	0	0	0		0	0	0.19354	0.162393	0	0	0	0
WBGene00012208	ALG Class 26G	W02D9.2		0	0	0	0	0	0	0.189687	0		0	0	0	0.162393	0	0	0	0.180209
WBGene00012223	ALG Class 26G	W03C9.8		0	0	0.215091	0	0	0	0.189687	0.424445		0	0	0	0.162393	0	0	0.222818	0.180209
WBGene00012249	ALG Class 26G	W04E12.4		0	0	0	0.179138	0	0	0	0.212223		0	0	0	0.162393	0	0	0	0
WBGene00012294	ALG Class 26G	nspa-8, W06A7.5		0	0	0	0	0	0	0.189687	0.212223		0	0	0	0	0	0	0	0.180209
WBGene00012296	ALG Class 26G	spe-46, W06D4.2		0	0	0.215091	0	0	0	0.189687	0.212223		0	0	0.38708	0.162393	0	0	0.222818	0.180209
WBGene00012297	ALG Class 26G	W06D4.3		0	0	0.430181	0.179138	0	0	0.379373	0		0	0	0.19354	0.162393	0	0	0	0
WBGene00012315	ALG Class 26G	immt-2, W06H3.1		0	0	0	0	0	0	0	0.212223		0	0	0	0.324785	0	0	0	0
WBGene00012345	ALG Class 26G	W08E3.4		0	0	0	0	0	0	0	0.636668		0	0	0.19354	0.162393	0	0	0.445636	0.180209
WBGene00012357	ALG Class 26G	W09D6.4		0	0	0.645272	0.537413	0	0	1.51749	0		0	0	0.38708	0.162393	0	0	0	0.360417
WBGene00012360	ALG Class 26G	tat-3, W09D10.2		0	0	0.215091	0	0	0	0	0		0	10.405	0	0	0	0	0	0
WBGene00012379	ALG Class 26G	Y1A5A.1		0	0	0	0	0	0	0	0.212223		0	0	0.19354	0.162393	0	0	0	0.360417
WBGene00012401	ALG Class 26G	irld-57, Y6E2A.8		0	0	0.860363	0	0	0	0	0		0	0	0	0	0	0	0	0
WBGene00012402	ALG Class 26G	sfxn-1.3, Y6E2A.9		0	0	0.215091	0.179138	0	0	0.56906	0.424445		0	5.20251	0	0	0	0	0.222818	0
WBGene00012486	ALG Class 26G	Y18D10A.21		0	0	0.645272	0.358275	0	0	0.189687	0		0	5.20251	0.38708	0.64957	0	0	0.222818	0.540626
WBGene00012595	ALG Class 26G	Y38E10A.17		0	0	0.645272	0	0	0	0	0.212223		0	5.20251	0.38708	0	0	0	0.222818	0.540626
WBGene00012605	ALG Class 26G	Y38F1A.1		0	0	1.07545	1.07483	0	7.23544	2.27624	1.27334		0	5.20251	2.12894	1.13675	4.77791	5.18806	0.891272	0.720835
WBGene00012608	ALG Class 26G	hphd-1, Y38F1A.6		0	0	0	0	0	0	0	0		0	0	0	0.162393	0	0	0	0.180209
WBGene00012627	ALG Class 26G	Y38H6C.15		0	0	0.430181	0	0	0	0	0.212223		0	0	0.38708	0.324785	0	0	0	0.180209
WBGene00012636	ALG Class 26G	Y38H8A.2		0	0	0	0	0	0	0	0		0	0	0	0	4.77791	0	0.222818	0
WBGene00012637	ALG Class 26G	Y38H8A.3		0	0	0	0.179138	0	0	0	0		0	0	0	0.324785	0	0	0	0
WBGene00012638	ALG Class 26G	Y38H8A.4		0	0	0	0.358275	0	0	0	0		0	0	0	0	0	0	0	0
WBGene00012642	ALG Class 26G	Y39A1A.2		0	0	0.215091	0	0	0	0.379373	0.212223		0	0	0	0	0	0	0.445636	0.180209
WBGene00012660	ALG Class 26G	Y39A1A.24		0	0	0	0	0	0	0	0		0	0	0	0	0	0	0	0
WBGene00012712	ALG Class 26G	ttm-1, Y39E4A.2		0	0	0.215091	0	0	0	0	0.212223		0	0	0	0	0	0	0	0
WBGene00012713	ALG Class 26G	bckd-1A, Y39E4A.3		0	0	0	0	0	0	0	0		0	0	0	0.162393	0	0	0	0.180209
WBGene00012720	ALG Class 26G	Y39E4B.11		0	0	0.430181	0.179138	0	0	0	0		0	0	0	0.324785	0	0	0	0
WBGene00012721	ALG Class 26G	Y39E4B.13		0	0	0.645272	0.537413	0	0	0	0.636668		0	0	0	0.162393	0	0	0.222818	0
WBGene00012741	ALG Class 26G	Y40H4A.2		0	4.59547	1.07545	0.179138	0	0	0.56906	0.212223		0	0	0.19354	0	0	0	0	0.180209
WBGene00012761	ALG Class 26G	Y41C4A.18		0	0	0	0	0	0	0.189687	0		0	5.20251	0.77416	0.324785	0	0	0	0
WBGene00012765	ALG Class 26G	Y41E3.7		0	0	0	0	0	0	0	0		0	0	0	0	0	0	0.222818	0
WBGene00012766	ALG Class 26G	Y41E3.8		0	0	0	0	0	0	0	0		0	0	0	0	0	0	0	0
WBGene00012768	ALG Class 26G	eef-1B.2, Y41E3.10		0	0	0.215091	0	0	0	0	0.212223		0	0	0.38708	0.162393	0	0	0	0.180209
WBGene00012781	ALG Class 26G	nspd-7, Y43C5A.1		0	0	0.215091	0.537413	0	0	0.379373	0.424445		0	0	0.58062	0.974355	0	5.18806	0	0.180209
WBGene00012784	ALG Class 26G	Y43C5A.4		0	0	0	0	0	0	0	0.424445		0	5.20251	0	0	0	0	0	0
WBGene00012786	ALG Class 26G	Y43C5B.3		0	0	0.215091	0.537413	0	0	0	1.27334		0	0	0	0	0	0	0	0.360417
WBGene00012809	ALG Class 26G	Y43F8A.2		0	4.59547	0.860363	0	0	0	0.56906	0.424445		0	0	0.19354	0	0	0	0.222818	0
WBGene00012827	ALG Class 26G	Y43F8C.5		0	0	0.430181	0.179138	0	0	0	0.212223		0	0	0.19354	0.162393	0	0	0.222818	0.360417
WBGene00012831	ALG Class 26G	Y43F8C.9		0	0	0.645272	0	0	0	0.189687	0		0	0	0.38708	0	0	0	0	0
WBGene00012855	ALG Class 26G	Y44A6D.5		0	0	0	0	0	0	0.379373	0		0	0	0	0	0	0	0.222818	0.180209
WBGene00012859	ALG Class 26G	Y45F3A.1		0	0	0	0	0	0	0	0		0	0	0	0	0	0	0	0
WBGene00012871	ALG Class 26G	Y45F10B.3		0	0	1.07545	0.537413	0	0	0.189687	0.636668		0	0	0.58062	0.162393	0	0	0.445636	1.26146
WBGene00012905	ALG Class 26G	Y46G5A.14		0	0	0	0	4.64794	0	0	0		0	0	0	0.162393	0	0	0	0
WBGene00012912	ALG Class 26G	Y46G5A.22		0	0	0	0.179138	0	0	0.379373	0		0	0	0.19354	0.162393	0	0	0	0.180209
WBGene00012925	ALG Class 26G	wht-8, Y47D3A.11		0	0	0	0	0	0	0	0		0	0	0.19354	0	0	0	0	0.540626
WBGene00012926	ALG Class 26G	Y47D3A.13		0	0	0.430181	0.537413	0	0	1.32781	0.212223		0	0	0.19354	0.324785	0	0	0	0.540626
WBGene00012937	ALG Class 26G	Y47D3A.31		0	0	0.215091	0.179138	0	0	0.189687	0		0	0	0.77416	0.64957	0	0	0.445636	0.360417
WBGene00012946	ALG Class 26G	Y47H9B.2		0	0	0	0	0	0	0	0		0	0	0	0	0	0	0	0
WBGene00013033	ALG Class 26G	Y49E10.10		0	0	0.215091	0.358275	4.64794	0	0	0.84889		0	0	0.38708	0.162393	0	0	0.668454	0.180209
WBGene00013038	ALG Class 26G	ani-1, Y49E10.19		0	0	0	0.179138	0	0	0	0		0	0	0	0	0	0	0	0
WBGene00013052	ALG Class 26G	scrm-7, Y50E8A.9		0	0	0	0.179138	0	0	0	0		0	0	0	0	0	0	0.222818	0.180209
WBGene00013053	ALG Class 26G	Y50E8A.10		0	0	0.215091	0	0	0	0	0.212223		0	0	0	0	0	0	0	0
WBGene00013068	ALG Class 26G	Y51A2B.4		0	0	0	0	0	0	0	0.212223		0	0	0	0	0	0	0	0
WBGene00013085	ALG Class 26G	mpz-6, Y51B9A.3		0	0	0	0	0	0	0.189687	0		0	0	0.19354	0.162393	0	0	0	0
WBGene00013121	ALG Class 26G	spe-38, Y52B11A.1		0	0	0.215091	0	0	0	0.379373	0.212223		0	0	0	0	0	0	0	0.180209
WBGene00013138	ALG Class 26G	Y53C10A.10		0	0	0.215091	0.179138	0	0	0	0.424445		0	0	0	0.162393	0	0	0	0.360417
WBGene00013140	ALG Class 26G	mop-25.2, Y53C12A.4		0	4.59547	0	0.179138	0	0	0	0		0	0	0.19354	0	0	0	0	0
WBGene00013142	ALG Class 26G	Y53C12A.7		0	0	0	0	0	0	0	0		0	0	0	0	0	0	0	0
WBGene00013148	ALG Class 26G	Y53F4A.2		0	0	0	0	0	0	0	0		0	0	0	0	0	0	0.222818	0
WBGene00013175	ALG Class 26G	Y53F4B.36		0	0	0	0.179138	0	0	0.189687	0		0	0	0.19354	0	0	0	0	0
WBGene00013192	ALG Class 26G	Y54E2A.7		0	0	0	0.179138	0	0	0.379373	0		0	0	0	0.162393	0	0	0	0.180209
WBGene00013198	ALG Class 26G	Y54E5A.2		0	0	0	0	0	0	0	0		0	0	0	0.324785	0	0	0	0
WBGene00013237	ALG Class 26G	Y56A3A.19		0	0	0	0	0	0	0	0		0	0	0	0	0	0	0	0
WBGene00013238	ALG Class 26G	trap-4, Y56A3A.21		0	0	0	0.358275	0	0	0	0.212223		0	0	0	0.324785	0	0	0	0
WBGene00013290	ALG Class 26G	Y57G11A.2		0	0	0.645272	0.179138	0	0	0.56906	0.212223		0	0	0.9677	0	0	0	0	0.360417
[truncated: 24,183 more rows]
