# Supplementary material for: A low-abundance class of Dicer-dependent siRNAs produced from a variety of features in C. elegans
Source: HighWire-hosted journal article supplement (doi:10.1101/gr.279083.124), 2024-12-01
Supplement: Supplemental_Table_S11.xlsx [file Supplemental_Table_S11.xlsx]

## Sheet: Table S11
Supplemental Table S11. Geometric mean-normalized mRNA-seq read counts and statistical analysis for rde-1(null) and wild type gravid adults.
Identifier	Public name	Sequence name	Description	GO Term	wild type rep 1	wild type rep 2	wild type rep 3	rde-1 rep 1	rde-1 rep 2	rde-1 rep 3	log2 fold change	lfc SE	stat	p-value	adjusted p-value
WBGene00021768	Y51F10.7	Y51F10.7	NA	None	948.513	981.968	870.903	303.437	270.582	293.617	-1.69158	0.126441	-13.3785	8.07994e-41	1.08433e-36
WBGene00004323	rde-1	K08H10.7	rde-1 encodes a member of the Argonaute (SGO) and PIWI family of proteins; rde-1 activity is required for RNA-mediated interference (RNAi); specifically, in RNAi induced by exogenous dsRNA, RDE-1 acts as the siRNA acceptor for siRNAs produced by DCR-1-mediated cleavage; subsequently, RDE-1 directs a multi-protein complex to homologous mRNA targets to trigger their destabilizatioNAd degradation; R…	GO:0031048~regulatory ncRNA-mediated heterochromatin formation, GO:0035194~regulatory ncRNA-mediated post-transcriptional gene silencing, GO:0005634~nucleus, GO:0005737~cytoplasm, GO:0016442~RISC complex, GO:0036464~cytoplasmic ribonucleoprotein granule, GO:0003676~nucleic acid binding, GO:0003727~single-stranded RNA binding, GO:0004521~RNA endonuclease activity, GO:0005515~protein binding, GO:00…	1505.55	1618.72	1389.2	1.07124	0.863978	0.834118	-10.6876	0.841789	-12.6963	6.19648e-37	4.15784e-33
WBGene00022590	ZC317.7	ZC317.7	NA	None	300.095	307.098	295.767	86.7848	93.6569	83.6814	-1.77304	0.175425	-10.1071	5.14017e-24	2.29937e-20
WBGene00012961	Y47H10A.5	Y47H10A.5	NA	GO:0000956~nuclear-transcribed mRNA catabolic process, GO:0090304~nucleic acid metabolic process, GO:0110155~NAD-cap decapping, GO:0005634~nucleus, GO:0005829~cytosol, GO:0000166~nucleotide binding, GO:0003723~RNA binding, GO:0004518~nuclease activity, GO:0016787~hydrolase activity, GO:0034353~mRNA 5'-diphosphatase activity, GO:0046872~metal ion binding	17.1973	19.5068	15.3127	107.164	109.81	110.096	2.65712	0.314753	8.44194	3.12116e-17	1.04715e-13
WBGene00014955	Y102A5C.6	Y102A5C.6	NA	None	111.525	120.296	91.3063	20.3684	19.3497	15.2483	-2.56098	0.310351	-8.25188	1.55926e-16	4.18504e-13
WBGene00015759	C14C6.5	C14C6.5	C14C6.5 encodes a protein that coNAns a Metridin-like ShK toxin domain; C14C6.5 is involved in the transcriptional, iNAe immune response towards several different bacterial pathogens.	GO:0045087~innate immune response	414.435	383.425	235.431	125.776	117.624	84.7444	-1.65628	0.21998	-7.52921	5.1047e-14	1.14175e-10
WBGene00013654	Y105C5B.15	Y105C5B.15	NA	GO:0003993~acid phosphatase activity, GO:0016787~hydrolase activity, GO:0046872~metal ion binding	470.923	451.807	323.87	195.614	160.864	136.569	-1.34071	0.1855	-7.22755	4.9177e-13	9.42793e-10
WBGene00021928	Y55F3AM.11	Y55F3AM.11	NA	GO:0032259~methylation, GO:0008168~methyltransferase activity	61.3886	56.1359	76.3736	183.407	203.265	179.975	1.54165	0.214598	7.18391	6.7744e-13	1.13641e-09
WBGene00021503	ctsa-4.2	Y40D12A.2	NA	GO:0006508~proteolysis, GO:0016020~membrane, GO:0045121~membrane raft, GO:0004180~carboxypeptidase activity, GO:0004185~serine-type carboxypeptidase activity, GO:0008233~peptidase activity, GO:0016787~hydrolase activity	251.988	257.524	232.032	117.867	90.3913	82.1682	-1.35964	0.192068	-7.07896	1.45235e-12	2.16562e-09
WBGene00021236	pud-1.2	Y19D10B.7	PUD-1.2, along with PUD-1.1, encodes a protein (CE25224) of unknown function; the PUD-1.2/PUD-1.1 proteins are present at significantly higher levels in daf-2 mutant vs. wild-type adults during a temperature shift from 15 to 25 degrees C; pud-1.2(RNAi) animals have no obvious mutant phenotype (i. e., they have no obvious defect in fertility or germline maintenance); the PUD-1.2/PUD-1.1 proteins b…	None	99.7026	80.328	113.673	231.744	278.339	230.51	1.33244	0.195807	6.80486	1.01149e-11	1.35742e-08
WBGene00014954	Y102A5C.5	Y102A5C.5	NA	None	70.5899	54.432	72.8527	15.0196	9.03429	5.20249	-2.78996	0.416598	-6.69702	2.12719e-11	2.59517e-08
WBGene00000216	asp-3	H22K11.1	asp-3 encodes aNApartyl protease homolog that is required, in parallel with ASP-4 but downstream of CLP-1 and TRA-3, for degenerative (necrotic-like) cell death in neurons induced by mutations such as mec-4(d), deg-3(d), or gsa-1(gf).	GO:0006508~proteolysis, GO:0008219~cell death, GO:0012501~programmed cell death, GO:0097300~programmed necrotic cell death, GO:0005576~extracellular region, GO:0005737~cytoplasm, GO:0005764~lysosome, GO:0004190~aspartic-type endopeptidase activity, GO:0008233~peptidase activity, GO:0016787~hydrolase activity	8411.72	7607.97	6389.04	4838.25	4009.05	4123.55	-0.78883	0.121655	-6.48414	8.92417e-11	9.9802e-08
WBGene00019605	ctsa-4.1	K10B2.2	NA	GO:0006508~proteolysis, GO:0004180~carboxypeptidase activity, GO:0004185~serine-type carboxypeptidase activity, GO:0008233~peptidase activity, GO:0016787~hydrolase activity	167.786	171.721	130.346	64.572	62.7127	43.997	-1.45831	0.237227	-6.14735	7.87904e-10	8.13359e-07
WBGene00198814	F31C3.15	F31C3.15	NA	None	984.417	1094.27	754.927	576.092	441.268	346.485	-1.05631	0.175994	-6.00196	1.94949e-09	1.86872e-06
WBGene00006925	vit-1	K09F5.2	NA	GO:0006869~lipid transport, GO:0005576~extracellular region, GO:0005319~lipid transporter activity, GO:0045735~nutrient reservoir activity	15887.4	14359.4	10494.5	7871.76	7650.57	8171.67	-0.781812	0.133176	-5.87052	4.34423e-09	3.88664e-06
WBGene00006926	vit-2	C42D8.2	vit-2 encodes the vitellogenin homolog YP170; vit-2 is expressed in the adult hermaphrodite intestine and VIT-2 is secreted into the pseudocoelomic space before being taken up by developing oocytes; vit-2 expression is regulated iNAsex-, stage-, and tissue-specific manner by the ELT-2/GATA and MAB-3 transcription factors.	GO:0006869~lipid transport, GO:0005576~extracellular region, GO:0031410~cytoplasmic vesicle, GO:0031983~vesicle lumen, GO:0042718~yolk granule, GO:0005319~lipid transporter activity, GO:0045735~nutrient reservoir activity	54154.1	47318.3	33919	26489.3	23507	26424.2	-0.82507	0.141487	-5.83143	5.49557e-09	4.60941e-06
WBGene00007362	cyp-35C1	C06B3.3	cyp-35C1 encodes one of over 80 C. elegans cytochrome P450s, NADPH-dependent monooxygenases that metabolize endogenous and exogenous compounds; RT-PCR experiments indicate that cyp-35C1 mRNA is upregulated in response to treatment with xenobiotics, such as PCBs (polychlorinated biphenyls) or PAHs (polycyclic aromatic hydrocarbons); loss of cyp-35A/C gene family activity in the presence of xenobio…	GO:0006082~organic acid metabolic process, GO:0006805~xenobiotic metabolic process, GO:0009410~response to xenobiotic stimulus, GO:0005737~cytoplasm, GO:0043231~intracellular membrane-bounded organelle, GO:0004497~monooxygenase activity, GO:0005506~iron ion binding, GO:0008395~steroid hydroxylase activity, GO:0016491~oxidoreductase activity, GO:0016705~oxidoreductase activity, acting on paired do…	378.507	336.529	321.951	198.239	194.875	166.99	-0.888935	0.158603	-5.60479	2.08507e-08	1.64598e-05
WBGene00001896	his-22	K06C4.12	his-22 encodes an H2B histone.	GO:0000786~nucleosome, GO:0005634~nucleus, GO:0003677~DNA binding, GO:0030527~structural constituent of chromatin, GO:0044877~protein-containing complex binding, GO:0046982~protein heterodimerization activity	246.115	261.436	311.026	541.873	656.751	412.271	0.973729	0.174692	5.57397	2.48992e-08	1.67074e-05
WBGene00001926	his-52	F07B7.4	his-52 encodes an H2B histone.	GO:0000786~nucleosome, GO:0005634~nucleus, GO:0003677~DNA binding, GO:0030527~structural constituent of chromatin, GO:0044877~protein-containing complex binding, GO:0046982~protein heterodimerization activity	246.115	261.436	311.026	541.873	656.751	412.271	0.973729	0.174692	5.57397	2.48992e-08	1.67074e-05
WBGene00017881	asp-13	F28A12.4	NA	GO:0006508~proteolysis, GO:0008219~cell death, GO:0005764~lysosome, GO:0004190~aspartic-type endopeptidase activity, GO:0008233~peptidase activity, GO:0016787~hydrolase activity	993.154	920.043	962.146	1529.38	1349.77	1515.13	0.611863	0.109539	5.58578	2.32647e-08	1.67074e-05
WBGene00010070	nep-17	F54F11.2	nep-17 encodes a neprilysin; neprilysins are thermolysin-like zinc metallopeptidases, found on the outer surface of animal cells, that negatively regulate small signalling peptides (e.g., enkephalin, tachykinin, insulin, and natriuretic peptides) by cleaving them; NEP-17 has no clear orthologs in other organisms.	GO:0006508~proteolysis, GO:0016485~protein processing, GO:0005886~plasma membrane, GO:0016020~membrane, GO:0045121~membrane raft, GO:0004222~metalloendopeptidase activity, GO:0008233~peptidase activity, GO:0008237~metallopeptidase activity, GO:0016787~hydrolase activity, GO:0046872~metal ion binding	1544.3	1525.76	1219	922.371	767.005	920.256	-0.716442	0.129944	-5.51348	3.51809e-08	2.24822e-05
WBGene00009692	F44E5.5	F44E5.5	F44E5.5 encodes a member of the Hsp70 family of heat shock proteins; as loss of F44E5.5 activity via large-scale RNAi screens results in no obvious defects, the precise role of F44E5.5 in C. elegans development and/or behavior is not yet known.	GO:0006950~response to stress, GO:0042026~protein refolding, GO:0051085~chaperone cofactor-dependent protein refolding, GO:0005634~nucleus, GO:0005737~cytoplasm, GO:0005829~cytosol, GO:0005886~plasma membrane, GO:0005524~ATP binding, GO:0016887~ATP hydrolysis activity, GO:0031072~heat shock protein binding, GO:0044183~protein folding chaperone, GO:0140662~ATP-dependent protein folding chaperone	1745.41	1419.56	1829.86	934.259	1161.55	905.101	-0.734789	0.134543	-5.46136	4.72495e-08	2.75691e-05
WBGene00016781	phat-7	C49G7.3	NA	None	308.881	283.703	263.552	127.568	171.417	140.559	-0.95685	0.175052	-5.4661	4.60058e-08	2.75691e-05
WBGene00012615	dct-16	Y38H6C.1	NA	None	4282.29	4567.44	4494.5	3184.05	3200.95	2850.69	-0.531193	0.0978824	-5.42685	5.73583e-08	3.20729e-05
WBGene00018823	F54E2.1	F54E2.1	NA	GO:0045087~innate immune response, GO:0045121~membrane raft	514.638	477.723	506.133	316.14	298.18	295.937	-0.720048	0.132896	-5.41814	6.02228e-08	3.23276e-05
WBGene00044213	Y102A5C.36	Y102A5C.36	NA	None	37.5784	37.1732	40.6954	4.29213	5.49783	7.02812	-2.76562	0.513701	-5.3837	7.29687e-08	3.76631e-05
TURMOIL2_Harbinger	Repetitive element		Transposable element	None	212.03	259.385	197.15	108.166	115.983	107.076	-1.0119	0.18903	-5.35313	8.6446e-08	4.29669e-05
WBGene00006603	tps-2	F19H8.1	tps-2 encodes one of two trehalose-6-phosphate synthase proteins in C. elegans, and RNAi of both enzymes leads to a more than 90% reduction decrease in trehalose levels, but does not appear to affect viability or development; the tps-2 mRNA is expressed throughout development.	GO:0005991~trehalose metabolic process, GO:0005992~trehalose biosynthetic process, GO:0070413~trehalose metabolism in response to stress, GO:0005829~cytosol, GO:0005946~alpha,alpha-trehalose-phosphate synthase complex (UDP-forming), GO:0003824~catalytic activity, GO:0003825~alpha,alpha-trehalose-phosphate synthase (UDP-forming) activity, GO:0004805~trehalose-phosphatase activity, GO:0016740~trans…	763.252	717.08	741.217	481.37	473.954	495.247	-0.614574	0.118127	-5.20268	1.9644e-07	9.41507e-05
WBGene00009396	clec-65	F35C5.8	NA	GO:0045087~innate immune response	256.547	258.281	232.108	160.765	104.008	109.528	-1.00379	0.19535	-5.13841	2.77067e-07	0.000128215
WBGene00001099	dsc-4	K02D7.4	dsc-4 encodes the C. elegans ortholog of the large subunit of the microsomal triglyceride transfer protein; dsc-4 affects the length of the defecation cycle and genetically interacts with clk-1 with respect to defecation cycle length, and also with respect to the clk-1- dependent adjustment of defecation cycle length to temperature; a DSC-4::GFP fusion protein is expressed in the intestine beginn…	GO:0006869~lipid transport, GO:0015914~phospholipid transport, GO:0016043~cellular component organization, GO:0030968~endoplasmic reticulum unfolded protein response, GO:0034377~plasma lipoprotein particle assembly, GO:0036498~IRE1-mediated unfolded protein response, GO:0042157~lipoprotein metabolic process, GO:0042953~lipoprotein transport, GO:0005783~endoplasmic reticulum, GO:0005794~Golgi appa…	611.692	549.312	453.175	364.236	284.492	238.735	-0.865337	0.170541	-5.07408	3.89375e-07	0.00017418
WBGene00007787	C27H6.8	C27H6.8	NA	GO:0005634~nucleus, GO:0005737~cytoplasm	1076.52	1096.88	1205.43	1635.51	1582.84	1637.03	0.522191	0.104926	4.97675	6.46617e-07	0.000279923
WBGene00010212	fbxa-192	F57G4.8	This gene encodes a protein coNAning an F-box, a motif predicted to mediate protein-protein interactions either with homologs of yeast Skp-1p or with other proteins; this gene's encoded proteiNAso coNAns an FTH/DUF38 motif, which may also mediate protein-protein interaction.	GO:0045087~innate immune response	106.835	122.306	99.4456	42.8679	45.3767	49.6405	-1.24868	0.251371	-4.96748	6.78273e-07	0.000284451
WBGene00015756	C14C6.2	C14C6.2	NA	None	116.328	85.4468	44.3198	36.4671	11.8155	15.2186	-2.03899	0.414484	-4.91934	8.68369e-07	0.000353137
WBGene00003786	npa-1	VC5.3	npa-1 encodes a large polyprotein precursor that is posttranslationally cleaved to multiple units of ~14.5kDa, each of which is a strong binding protein for fatty acids and retinol (VitamiNA; the lipid binding sites of NA1-derived peptides are unusually apolar; NA1-derived peptides probably are carrier proteins that enable distribution of these lipids within nematodes; NA1-derived peptides are al…	None	3758.35	3350.68	2859.13	2347.34	2282.63	2017.16	-0.584409	0.1205	-4.84989	1.23533e-06	0.00048759
WBGene00009518	clec-166	F38A1.5	NA	GO:0045087~innate immune response	39.318	50.9843	39.2654	12.8592	8.70639	8.397	-2.12948	0.440222	-4.83729	1.31618e-06	0.000504661
WBGene00011330	T01D3.6	T01D3.6	NA	GO:0005576~extracellular region, GO:0004867~serine-type endopeptidase inhibitor activity, GO:0005509~calcium ion binding, GO:0030414~peptidase inhibitor activity	782.813	661.952	459.027	398.515	344.072	303.779	-0.863134	0.178891	-4.82492	1.4006e-06	0.000522114
WBGene00014057	ZK673.1	ZK673.1	NA	GO:0016020~membrane	46.2784	68.0648	46.4821	21.8107	7.3338	12.6509	-2.05045	0.426454	-4.80813	1.52346e-06	0.000552561
WBGene00015400	cyp-35A2	C03G6.15	cyp-35A2 encodes one of over 80 C. elegans cytochrome P450s, NADPH-dependent monooxygenases that metabolize endogenous and exogenous compounds; RT-PCR experiments indicate that cyp-35A2 mRNA is upregulated in response to treatment with xenobiotics, such as PCBs (polychlorinated biphenyls) or PAHs (polycyclic aromatic hydrocarbons); loss of cyp-35A/C gene family activity in the presence of xenobio…	GO:0006082~organic acid metabolic process, GO:0006805~xenobiotic metabolic process, GO:0009410~response to xenobiotic stimulus, GO:0005737~cytoplasm, GO:0043231~intracellular membrane-bounded organelle, GO:0004497~monooxygenase activity, GO:0005506~iron ion binding, GO:0008395~steroid hydroxylase activity, GO:0016491~oxidoreductase activity, GO:0016705~oxidoreductase activity, acting on paired do…	602.242	676.631	516.63	377.183	403.478	350.619	-0.665573	0.14197	-4.68813	2.75718e-06	0.00097372
WBGene00020938	clec-218	W02D7.2	NA	GO:0045087~innate immune response, GO:0050830~defense response to Gram-positive bacterium	237.009	219.745	206.559	98.5957	143.093	111.889	-0.901726	0.192747	-4.67828	2.89288e-06	0.000995448
WBGene00007875	dod-24	C32H11.12	NA	GO:0045087~innate immune response, GO:0050829~defense response to Gram-negative bacterium	154.659	127.502	136.577	71.8087	65.5603	69.938	-1.01362	0.219144	-4.62539	3.73893e-06	0.00125441
WBGene00019232	ugt-13	H23N18.1	NA	GO:0016020~membrane, GO:0008194~UDP-glycosyltransferase activity, GO:0015020~glucuronosyltransferase activity, GO:0016740~transferase activity, GO:0016757~glycosyltransferase activity,	208.956	154.267	263.637	96.4377	106.057	119.081	-0.962483	0.217057	-4.43424	9.23965e-06	0.0030243
WBGene00007384	swt-3	C06G8.1	NA	GO:0008643~carbohydrate transport, GO:0034219~carbohydrate transmembrane transport, GO:0000139~Golgi membrane, GO:0016020~membrane, GO:0051119~sugar transmembrane transporter activity	186.774	176.869	245.218	107.159	108.798	117.528	-0.870591	0.197489	-4.4083	1.04186e-05	0.00332898
WBGene00002026	hsp-70	C12C8.1	hsp-70 encodes a heat-shock protein that is a member of the hsp70 family of molecular chaperones.	GO:0006950~response to stress, GO:0008340~determination of adult lifespan, GO:0009408~response to heat, GO:0030968~endoplasmic reticulum unfolded protein response, GO:0036498~IRE1-mediated unfolded protein response, GO:0042026~protein refolding, GO:0051085~chaperone cofactor-dependent protein refolding, GO:0005634~nucleus, GO:0005737~cytoplasm, GO:0005829~cytosol, GO:0005832~chaperonin-containing…	199.256	265.785	255.48	145.711	125.71	143.899	-0.798839	0.183023	-4.36468	1.27309e-05	0.00397321
WBGene00010050	F54D5.4	F54D5.4	NA	GO:0045087~innate immune response	278.418	310.442	385.311	446.158	522.746	673.162	0.752026	0.172501	4.35955	1.30327e-05	0.00397498
WBGene00018602	F48D6.4	F48D6.4	NA	GO:0005840~ribosome	700.543	663.485	678.565	473.018	508.79	404.88	-0.559139	0.130429	-4.28693	1.81156e-05	0.00540247
WBGene00018138	folt-2	F37B4.7	folt-2 encodes a putative folate transporter; FOLT-2 is orthologous to the human folate transporters SLC19A1, SLC19A2, and SLC19A3 (Solute Carrier Family 19 (thiamine transporter), Member 1, 2 or 3); heterologously expressed FOLT-2 does not significantly transport folate; FOLT-2 does not seem to have any obvious function, perhaps because of genetic reduNAcy with its paralogs, FOLT-1 and FOLT-3.	GO:0035461~vitamin transmembrane transport, GO:0051180~vitamin transport, GO:0055085~transmembrane transport, GO:0005886~plasma membrane, GO:0016020~membrane, GO:0005542~folic acid binding, GO:0090482~vitamin transmembrane transporter activity	3640.92	3788.97	3091.21	2795.6	2354.52	2156.5	-0.52635	0.123337	-4.26759	1.97596e-05	0.00576466
WBGene00270321	Y41C4A.32	Y41C4A.32	NA	GO:0006886~intracellular protein transport, GO:0006888~endoplasmic reticulum to Golgi vesicle-mediated transport, GO:0006890~retrograde vesicle-mediated transport, Golgi to endoplasmic reticulum, GO:0006891~intra-Golgi vesicle-mediated transport, GO:0030126~COPI vesicle coat, GO:0030663~COPI-coated vesicle membrane	98.113	95.8505	100.054	36.4449	35.961	58.3118	-1.1619	0.274122	-4.23863	2.24891e-05	0.00642135
WBGene00015403	clec-10	C03H5.1	NA	None	223.528	217.683	157.84	128.601	88.0816	108.478	-0.882842	0.211868	-4.16695	3.08707e-05	0.00845478
WBGene00016943	acdh-1	C55B7.4	acdh-1 encodes a short-chaiNAyl-CoA dehydrogenase; ACDH-1 is predicted to be a mitochondrial enzyme that catalyzes the first step of fatty acid beta-oxidatioNAd thus plays a key role in energy production; steady-state acdh-1 mRNA levels are under the control of the MDT-15 mediator complex subunit; iNAdition, gene expression studies indicate that acdh-1 expression is upregulated in daf-2 mutant an…	GO:0045087~innate immune response, GO:0050829~defense response to Gram-negative bacterium, GO:0005739~mitochondrion, GO:0003995~acyl-CoA dehydrogenase activity, GO:0016491~oxidoreductase activity, GO:0016627~oxidoreductase activity, acting on the CH-CH group of donors, GO:0050660~flavin adenine dinucleotide binding	11596.7	10504.2	11619.4	8956.68	8581.21	7852.29	-0.409458	0.0981628	-4.17121	3.02988e-05	0.00845478
WBGene00004130	ketn-1	F54E2.3	ketn-1 encodes an ortholog of kettin (in D. melanogaster, SALLIMUS), an invertebrate isoform or paralog of titin; ketn-1 is transcriptionally upregulated two-fold by hypoxia, requires both HIF-1 and VHL-1 for this induction, and coNAns three predicted HIF-1 binding sites in its predicted 5' regulatory region; ketn-1's induction by hypoxia correlates with upregulation of other genes required for c…	GO:0005737~cytoplasm, GO:0005856~cytoskeleton, GO:0030017~sarcomere, GO:0031674~I band, GO:0003779~actin binding, GO:0004672~protein kinase activity	1153.89	993.916	1001.64	586.498	853.839	465.524	-0.724779	0.174564	-4.15193	3.29676e-05	0.00884851
WBGene00007496	npax-4	C09G9.7	npax-4 is a divergent Paired domain-only protein; it encodes only the first part of the Paired domain (the PAI subdomain) and an EH1 (octapeptide) motif; the Paired domain is a DNA-binding domain; the PAI subdomain is likely also DNA-binding; NA genes mostly diverged from complete Paired domain-only and/or Paired homeobox genes; no obvious orthologs are present iNAthropods or vertebrates; NA-4 is…	GO:0006355~regulation of DNA-templated transcription, GO:0005634~nucleus, GO:0000978~RNA polymerase II cis-regulatory region sequence-specific DNA binding, GO:0000981~DNA-binding transcription factor activity, RNA polymerase II-specific, GO:0003677~DNA binding	7.70486	26.4189	50.8126	3.67555	2.51162	4.83855	-2.79508	0.676499	-4.13168	3.60115e-05	0.00947596
WBGene00007807	C29F3.7	C29F3.7	C29F3.7 encodes a CUB-like domain-coNAning protein; C29F3.7 is involved in the transcriptional, iNAe immune response towards several different bacterial pathogens.	GO:0045087~innate immune response, GO:0045121~membrane raft	227.786	199.233	165.959	123.96	119.292	81.0804	-0.872175	0.213656	-4.08215	4.46207e-05	0.0115156
WBGene00009691	F44E5.4	F44E5.4	F44E5.4 encodes a member of the Hsp70 family of heat shock proteins; as loss of F44E5.4 activity via large-scale RNAi screens results in no obvious defects, the precise role of F44E5.4 in C. elegans development and/or behavior is not yet known.	GO:0006950~response to stress, GO:0042026~protein refolding, GO:0051085~chaperone cofactor-dependent protein refolding, GO:0005634~nucleus, GO:0005737~cytoplasm, GO:0005783~endoplasmic reticulum, GO:0005829~cytosol, GO:0005886~plasma membrane, GO:0000166~nucleotide binding, GO:0005524~ATP binding, GO:0016887~ATP hydrolysis activity, GO:0031072~heat shock protein binding, GO:0044183~protein foldin…	912.685	1176.64	994.193	662.123	709.049	769.572	-0.525963	0.129029	-4.07631	4.57566e-05	0.0115859
WBGene00022497	Y119D3B.21	Y119D3B.21	NA	None	242.233	268.824	314.466	165.646	182.205	164.251	-0.691857	0.170622	-4.0549	5.01549e-05	0.0124644
WBGene00006767	unc-31	ZK897.1	unc-31 encodes a pleckstrin homology (PH) domain-coNAning protein that is the C. elegans ortholog of human CADPS/CAPS (calcium-dependent activator protein for secretion OMIM:604667); UNC-31 functions in post-docking calcium-regulated dense-core vesicle fusion that is required for egg laying, locomotion, pharyngeal pumping, and recovery from the dauer larval stage; iNAdition, UNC-31 functions in t…	GO:0001820~serotonin secretion, GO:0006887~exocytosis, GO:0006937~regulation of muscle contraction, GO:0007419~ventral cord development, GO:0007626~locomotory behavior, GO:0007635~chemosensory behavior, GO:0015031~protein transport, GO:0016079~synaptic vesicle exocytosis, GO:0018991~egg-laying behavior, GO:0030536~larval feeding behavior, GO:0045921~positive regulation of exocytosis, GO:0071244~c…	38.4434	30.2021	35.3845	66.2422	78.0849	88.5543	1.16718	0.290929	4.01191	6.023e-05	0.0146961
WBGene00001399	fat-7	F10D2.9	fat-7 encodes an essential delta-9 fatty acid desaturase that is required for the synthesis of monouNAurated fatty acids; fat-7 can substitute for the functions of the other two fatty acid desaturases, fat-5 and fat-6; RNA interference has shown that fat-7 is required for viability and normal growth.	GO:0001666~response to hypoxia, GO:0006629~lipid metabolic process, GO:0006631~fatty acid metabolic process, GO:0006633~fatty acid biosynthetic process, GO:0006636~unsaturated fatty acid biosynthetic process, GO:0009791~post-embryonic development, GO:0032364~intracellular oxygen homeostasis, GO:0005789~endoplasmic reticulum membrane, GO:0016020~membrane, GO:0004768~stearoyl-CoA 9-desaturase activ…	1102.1	1149.05	1196.27	820.995	776.668	913.006	-0.457545	0.11445	-3.99776	6.39452e-05	0.0152146
WBGene00006754	unc-15	F07A5.7	The unc-15 gene encodes a paramyosin ortholog; UNC-15 protein physically interacts with MHC A, one isoform of myosin heavy chain (MHC) in striated muscle; UNC-15 accumulation is decreased in the absence of UNC-54 (myosin B), implying that degradation of UNC-15 is inhibited by its binding myosin B; conversely, myosin B (but not MYO-3/myosiNA fails to accumulate in unc-15 mutants.	GO:0006936~muscle contraction, GO:0030241~skeletal muscle myosin thick filament assembly, GO:0040011~locomotion, GO:0045214~sarcomere organization, GO:0051493~regulation of cytoskeleton organization, GO:0060279~positive regulation of ovulation, GO:0060298~positive regulation of sarcomere organization, GO:1902404~mitotic actomyosin contractile ring contraction, GO:0005737~cytoplasm, GO:0016459~myo…	1233.82	924.904	1005.56	557.718	825.391	682.209	-0.613184	0.153478	-3.99526	6.46225e-05	0.0152146
WBGene00020408	T10D4.6	T10D4.6	NA	GO:0030833~regulation of actin filament polymerization, GO:0005737~cytoplasm, GO:0031267~small GTPase binding	377.742	443.986	334.576	241.05	242.39	270.717	-0.614384	0.156376	-3.92889	8.53384e-05	0.0197455
WBGene00019540	epic-2	K08D12.6	NA	None	369.064	299.779	394.953	226.059	216.575	247.475	-0.624388	0.159668	-3.91053	9.20924e-05	0.0209471
WBGene00008298	C54D10.3	C54D10.3	NA	None	207.643	217.408	208.334	138.348	141.7	94.2498	-0.762705	0.196591	-3.87966	0.000104604	0.0233965
WBGene00003828	nuc-1	C07B5.5	The nuc-1 gene encodes a DNase II homolog similar to mammaliaNAd Drosophila DNaseII enzymes and is required for DNA degradation during apoptosis as well as for degradation of dietary DNA during normal feeding; during apoptosis, NUC-1 functions iNAoptotic cells at an intermediate stage of DNA degradation, after the killing step, but prior to cell-corpse engulfment.	GO:0002785~negative regulation of antimicrobial peptide production, GO:0006259~DNA metabolic process, GO:0006309~apoptotic DNA fragmentation, GO:0006915~apoptotic process, GO:0005634~nucleus, GO:0005764~lysosome, GO:0004531~deoxyribonuclease II activity, GO:0016787~hydrolase activity	703.591	673.053	648.195	511.205	501.018	407.312	-0.513354	0.132522	-3.87371	0.00010719	0.0235818
WBGene00010904	ugt-62	M88.1	NA	GO:0016020~membrane, GO:0008194~UDP-glycosyltransferase activity, GO:0015020~glucuronosyltransferase activity, GO:0016740~transferase activity, GO:0016757~glycosyltransferase activity	1424.77	1450	1752.15	2031.58	2111.32	2102.22	0.431857	0.112479	3.83944	0.000123314	0.0265383
WBGene00015052	clec-52	B0218.8	NA	GO:0050830~defense response to Gram-positive bacterium	42.9186	27.9866	33.3392	8.57545	11.4084	10.1459	-1.77929	0.463728	-3.83693	0.000124584	0.0265383
WBGene00001564	icl-1	C05E4.9	icl-1 encodes a predicted isocitrate lyase/malate synthase, an enzyme known to function in the glyoxylate cycle; ICL-1 was identified iNAscreen for proteins that interact with GEX-3, a homolog of human HEM-2 which is required for embryonic development; ICL-1 appears to act downstream of DAF-16 to influence lifespan.	GO:0006097~glyoxylate cycle, GO:0006099~tricarboxylic acid cycle, GO:0008152~metabolic process, GO:0008340~determination of adult lifespan, GO:0019752~carboxylic acid metabolic process, GO:0005739~mitochondrion, GO:0009514~glyoxysome, GO:0003824~catalytic activity, GO:0004451~isocitrate lyase activity, GO:0004474~malate synthase activity, GO:0016740~transferase activity, GO:0016829~lyase activity	2790.83	2083.27	2444.24	1659.24	1985.71	1506.95	-0.506043	0.134287	-3.76838	0.000164313	0.0344543
WBGene00015156	cwf-19L2	B0361.2	NA	GO:0000398~mRNA splicing, via spliceosome, GO:0071014~post-mRNA release spliceosomal complex	625.798	678.148	626.235	861.846	819.411	947.766	0.446042	0.118774	3.7554	0.000173068	0.0357319
WBGene00043743	nsph-4.1	Y59E9AL.2	NA	None	7.367	4.32731	13.3824	0	0	0	-5.62863	1.50195	-3.74756	0.000178563	0.0363079
WBGene00016424	C34H4.1	C34H4.1	NA	GO:0045087~innate immune response, GO:0016020~membrane, GO:0045121~membrane raft	43.4746	44.1103	26.5189	11.2288	14.7773	8.47886	-1.67874	0.451725	-3.71629	0.000202168	0.0404939
WBGene00006789	unc-54	F11C3.3	unc-54 encodes a muscle myosin class II heavy chain (MHC B); UNC-54 is the major myosin heavy chain expressed in C. elegans and is required for locomotioNAd egg-laying; in vivo and in vitro, UNC-54 interacts with ITR-1, an IP3 receptor, and this interaction may provide a link between calcium signaling and the muscle cytoskeleton; UNC-54 is a thick filament component that is expressed in multiple …	GO:0006936~muscle contraction, GO:0018991~egg-laying behavior, GO:0030241~skeletal muscle myosin thick filament assembly, GO:0040011~locomotion, GO:0045214~sarcomere organization, GO:0005737~cytoplasm, GO:0005859~muscle myosin complex, GO:0005863~striated muscle myosin thick filament, GO:0016459~myosin complex, GO:0016460~myosin II complex, GO:0030016~myofibril, GO:0030017~sarcomere, GO:0031672~A…	3887.79	2858.36	2679.51	1608.79	2620.06	1908.01	-0.618201	0.167089	-3.69984	0.000215736	0.0425762
MIRAGE1_EnSpm	Repetitive element		Transposable element	None	112.178	92.3235	87.9443	56.7606	50.6887	43.9924	-0.951221	0.257763	-3.6903	0.000223993	0.0435651
WBGene00019978	hacd-1	R09B5.6	p > 0.05, not analyzed	p > 0.05, not analyzed	708.983	769.447	614.89	508.073	536.434	444.27	-0.49133	0.135828	-3.61729	0.000297707	0.0570748
WBGene00021338	Y34F4.3	Y34F4.3	p > 0.05, not analyzed	p > 0.05, not analyzed	11.0069	9.59007	15.1332	39.6758	31.9249	37.5394	1.5987	0.445801	3.58612	0.000335629	0.0634386
WBGene00020393	T10B5.7	T10B5.7	p > 0.05, not analyzed	p > 0.05, not analyzed	217.074	222.294	202.034	143.31	126.493	144.63	-0.630627	0.176156	-3.57993	0.00034368	0.0640582
PALTA3_CE_DNA_transposon	Repetitive element		p > 0.05, not analyzed	p > 0.05, not analyzed	102.317	136.287	149.795	87.8183	71.3078	51.4629	-0.895899	0.251535	-3.56172	0.000368427	0.0668377
WBGene00000988	dhs-25	F09E10.3	p > 0.05, not analyzed	p > 0.05, not analyzed	1493.69	1439.63	1341.49	1113.72	1065.89	1114.03	-0.37569	0.105482	-3.56163	0.000368554	0.0668377
WBGene00000888	cyn-12	C34D4.12	p > 0.05, not analyzed	p > 0.05, not analyzed	341.557	374.669	415.657	425.416	616.477	675.086	0.59864	0.168434	3.55416	0.000379193	0.0678502
WBGene00010769	asah-1	K11D2.2	p > 0.05, not analyzed	p > 0.05, not analyzed	185.415	185.041	136.716	115.744	82.9187	101.825	-0.755834	0.21455	-3.52288	0.000426882	0.0753785
WBGene00011821	cdf-2	T18D3.3	p > 0.05, not analyzed	p > 0.05, not analyzed	28.1139	16.4213	46.3872	10.4057	8.46378	6.41281	-1.80696	0.516404	-3.49911	0.000466805	0.0813575
WBGene00013874	cest-2.2	ZC376.2	p > 0.05, not analyzed	p > 0.05, not analyzed	210.078	229.134	179.671	130.513	136.238	131.452	-0.633428	0.182717	-3.46672	0.000526854	0.0906459
WBGene00015061	cpna-2	B0228.4	p > 0.05, not analyzed	p > 0.05, not analyzed	1681.59	1309.57	1266.21	867.743	1220.57	862.989	-0.527091	0.153235	-3.43975	0.000582252	0.0989092
WBGene00022587	ZC317.1	ZC317.1	p > 0.05, not analyzed	p > 0.05, not analyzed	24.546	19.4399	19.0952	4.28717	5.24747	5.05796	-2.10108	0.611947	-3.43343	0.000595999	0.0999789
WBGene00012867	seld-1	Y45F10A.4	p > 0.05, not analyzed	p > 0.05, not analyzed	158.548	150.63	182.832	233.8	266.223	238.795	0.584849	0.171088	3.41842	0.000629867	0.104356
WBGene00219413	Y38F2AL.12	Y38F2AL.12	p > 0.05, not analyzed	p > 0.05, not analyzed	26.1389	24.8135	31.2989	7.39905	5.81315	11.1914	-1.74472	0.515989	-3.38131	0.000721413	0.118065
WBGene00001263	emb-9	K04H4.1	p > 0.05, not analyzed	p > 0.05, not analyzed	3808.66	3157.7	2881.45	2299.69	2800.13	2133.25	-0.444655	0.132339	-3.35996	0.000779531	0.12604
WBGene00006819	unc-87	F08B6.4	p > 0.05, not analyzed	p > 0.05, not analyzed	2236.83	1821.33	1848.37	1241.04	1580.36	1559.18	-0.429724	0.128129	-3.35384	0.000796982	0.127327
WBGene00011222	R10H10.3	R10H10.3	p > 0.05, not analyzed	p > 0.05, not analyzed	419.809	457.147	605.602	665.565	710.539	709.374	0.489614	0.146321	3.34617	0.000819361	0.127858
WBGene00077757	E02H4.7	E02H4.7	p > 0.05, not analyzed	p > 0.05, not analyzed	32.9142	30.5344	42.2062	79.3779	65.5478	68.1315	1.00289	0.299667	3.34668	0.000817853	0.127858
WBGene00008584	irg-4	F08G5.6	p > 0.05, not analyzed	p > 0.05, not analyzed	49.0857	87.4359	79.2174	35.3699	42.8763	21.9276	-1.11577	0.335334	-3.32734	0.000876791	0.135248
WBGene00002280	let-2	F01G12.5	p > 0.05, not analyzed	p > 0.05, not analyzed	2879.39	2313.73	2184.68	1749.81	2096.45	1491.99	-0.466327	0.140512	-3.31876	0.000904194	0.13789
WBGene00011800	T16G1.6	T16G1.6	p > 0.05, not analyzed	p > 0.05, not analyzed	46.6769	41.1758	42.1061	13.9314	25.2771	11.7673	-1.34345	0.40575	-3.31102	0.000929564	0.140166
WBGene00022858	ZK1193.2	ZK1193.2	p > 0.05, not analyzed	p > 0.05, not analyzed	516.703	493.635	377.049	327.909	351.026	290.815	-0.515784	0.155947	-3.30743	0.000941573	0.140399
WBGene00007490	mks-5	C09G5.8	p > 0.05, not analyzed	p > 0.05, not analyzed	11.5418	27.0874	29.1622	4.00209	6.78887	5.70715	-1.97046	0.604408	-3.26015	0.00111353	0.160683
WBGene00019565	cyp-35A3	K09D9.2	p > 0.05, not analyzed	p > 0.05, not analyzed	133.968	110.78	90.0983	175.733	218.263	150.146	0.706921	0.216607	3.26361	0.00110003	0.160683
WBGene00020516	T15B7.1	T15B7.1	p > 0.05, not analyzed	p > 0.05, not analyzed	998.98	879.951	978.917	784.402	744.223	589.35	-0.433562	0.132939	-3.26138	0.00110873	0.160683
WBGene00000281	cah-3	K05G3.3	p > 0.05, not analyzed	p > 0.05, not analyzed	260.125	263.274	240.443	212.223	129.561	156.927	-0.620264	0.191034	-3.24689	0.00116675	0.166573
WBGene00006764	unc-27	ZK721.2	p > 0.05, not analyzed	p > 0.05, not analyzed	2248.29	1867.66	1924.57	1153.45	1770.31	1443.83	-0.466604	0.144379	-3.23181	0.00123011	0.173769
WBGene00001132	alp-1	T11B7.4	p > 0.05, not analyzed	p > 0.05, not analyzed	280.157	288.897	299.787	154.508	191.493	238.657	-0.569422	0.177397	-3.20987	0.00132794	0.185635
WBGene00010593	gsnl-1	K06A4.3	p > 0.05, not analyzed	p > 0.05, not analyzed	191.736	157.49	209.918	85.7232	138.254	122.46	-0.685212	0.213726	-3.20603	0.00134582	0.186195
WBGene00010681	mak-1	K08F8.1	p > 0.05, not analyzed	p > 0.05, not analyzed	2491.34	2094	2339.03	1681.54	1920.76	1824.65	-0.350881	0.109749	-3.19711	0.00138811	0.190085
Chapaev_2_CE_Chapaev	Repetitive element		p > 0.05, not analyzed	p > 0.05, not analyzed	388.31	371.492	306.356	265.597	267.19	217.472	-0.506388	0.160114	-3.16268	0.00156326	0.211908
WBGene00006404	tag-10	C31C9.1	p > 0.05, not analyzed	p > 0.05, not analyzed	554.524	476.911	340.811	322.519	344.767	257.497	-0.567613	0.180644	-3.14217	0.00167702	0.215985
WBGene00012583	clec-4	Y38E10A.5	p > 0.05, not analyzed	p > 0.05, not analyzed	41.7718	35.7856	35.4265	18.2174	12.1931	15.959	-1.2897	0.41074	-3.13994	0.00168984	0.215985
WBGene00015913	C17F4.7	C17F4.7	p > 0.05, not analyzed	p > 0.05, not analyzed	4569.07	4292.9	4473.02	3948.53	3364.56	3312.94	-0.327965	0.104223	-3.14676	0.0016509	0.215985
WBGene00021043	pck-1	W05G11.6	p > 0.05, not analyzed	p > 0.05, not analyzed	1276.72	904.121	1149.68	770.34	910.298	772.191	-0.440384	0.140042	-3.14466	0.00166278	0.215985
WBGene00022515	ttr-48	ZC64.2	p > 0.05, not analyzed	p > 0.05, not analyzed	133.072	123.856	163.817	188.765	205.36	243.736	0.5991	0.190801	3.13993	0.0016899	0.215985
WBGene00196396	F31C3.14	F31C3.14	p > 0.05, not analyzed	p > 0.05, not analyzed	140366	119359	101037	103804	81108	86830.4	-0.408802	0.130159	-3.14078	0.00168501	0.215985
WBGene00017678	asp-12	F21F8.4	p > 0.05, not analyzed	p > 0.05, not analyzed	179.296	170.589	125.834	92.6897	94.7249	110.569	-0.668373	0.213197	-3.13501	0.0017185	0.217568
WBGene00001864	him-5	D1086.4	p > 0.05, not analyzed	p > 0.05, not analyzed	132.003	261.036	221.168	401.835	316.849	270.288	0.684563	0.218713	3.12996	0.00174831	0.219274
WBGene00003734	nhx-6	F58E1.6	p > 0.05, not analyzed	p > 0.05, not analyzed	2.3738	4.20367	1.14726	18.6114	9.20581	18.5742	2.56491	0.821856	3.12087	0.00180316	0.224059
WBGene00001240	elo-2	F11E6.5	p > 0.05, not analyzed	p > 0.05, not analyzed	1516.23	1537.25	1344.49	1220.86	1168.01	1065.59	-0.348464	0.112191	-3.10599	0.0018964	0.233484
WBGene00018398	sptl-2	F43H9.2	p > 0.05, not analyzed	p > 0.05, not analyzed	360.399	295.244	311.998	212.297	247.535	229.899	-0.484957	0.156391	-3.10092	0.00192923	0.235366
WBGene00011736	T12D8.9	T12D8.9	p > 0.05, not analyzed	p > 0.05, not analyzed	328.774	238.533	237.97	146.752	225.249	144.997	-0.634305	0.20559	-3.08529	0.00203355	0.245859
WBGene00002348	myo-1	R06C7.10	p > 0.05, not analyzed	p > 0.05, not analyzed	746.535	463.66	597.1	353.461	528.948	291.207	-0.621442	0.202159	-3.07402	0.00211192	0.252114
WBGene00012217	W02H3.1	W02H3.1	p > 0.05, not analyzed	p > 0.05, not analyzed	42.3843	39.3297	42.4204	82.816	65.2304	78.2542	0.862432	0.280696	3.07248	0.00212287	0.252114
WBGene00010793	nspg-9	LLC1.2	p > 0.05, not analyzed	p > 0.05, not analyzed	494.253	463.737	1152.95	271.84	274.394	295.943	-1.32138	0.4324	-3.05592	0.00224372	0.264129
WBGene00017874	acdh-9	F28A10.6	p > 0.05, not analyzed	p > 0.05, not analyzed	578.522	544.939	508.081	399.728	433.276	409.4	-0.39117	0.12888	-3.03514	0.00240427	0.280568
WBGene00003836	nxt-1	Y71F9AM.5	p > 0.05, not analyzed	p > 0.05, not analyzed	398.083	403.21	505.299	527.381	571.396	690.132	0.452441	0.149757	3.02117	0.00251798	0.286367
WBGene00009643	F42G4.6	F42G4.6	p > 0.05, not analyzed	p > 0.05, not analyzed	13.4853	18.2814	18.0863	3.21591	3.51375	5.0773	-2.06998	0.684979	-3.02196	0.00251146	0.286367
WBGene00011803	T16G12.1	T16G12.1	p > 0.05, not analyzed	p > 0.05, not analyzed	565.405	484.348	393.488	370.604	355.893	311.253	-0.474505	0.157013	-3.02206	0.00251057	0.286367
WBGene00002017	hsp-16.11	T27E4.2	p > 0.05, not analyzed	p > 0.05, not analyzed	337.906	334.5	443.163	230.675	218.757	317.825	-0.540114	0.179448	-3.00986	0.00261367	0.290271
WBGene00006351	sur-5	K03A1.5	p > 0.05, not analyzed	p > 0.05, not analyzed	1588.55	1392.17	1271.14	1190.24	1064.62	1061	-0.358424	0.119179	-3.00743	0.00263463	0.290271
WBGene00007703	gbf-1	C24H11.7	p > 0.05, not analyzed	p > 0.05, not analyzed	892.099	985.083	746.526	634.811	600.921	734.512	-0.412318	0.137122	-3.00695	0.00263882	0.290271
WBGene00019298	pnp-1	K02D7.1	p > 0.05, not analyzed	p > 0.05, not analyzed	292.125	265.778	190.046	173.628	165.232	166.015	-0.563405	0.1871	-3.01126	0.00260167	0.290271
WBGene00006999	zyx-1	F42G4.3	p > 0.05, not analyzed	p > 0.05, not analyzed	162.637	124.943	151.404	81.5253	114.309	80.984	-0.665019	0.222401	-2.99017	0.00278818	0.296262
WBGene00008741	ctsa-1.2	F13D12.6	p > 0.05, not analyzed	p > 0.05, not analyzed	889.966	808.49	626.137	677.199	534.484	402.429	-0.527332	0.176533	-2.98715	0.00281592	0.296262
WBGene00010555	K04C1.5	K04C1.5	p > 0.05, not analyzed	p > 0.05, not analyzed	788.053	883.99	980.01	1005.32	1252.47	1209.02	0.386135	0.128874	2.99622	0.00273353	0.296262
WBGene00016782	phat-3	C49G7.4	p > 0.05, not analyzed	p > 0.05, not analyzed	56.3865	51.5944	50.4352	37.5196	21.9713	15.2381	-1.10225	0.36913	-2.98608	0.00282574	0.296262
WBGene00020349	T08B2.11	T08B2.11	p > 0.05, not analyzed	p > 0.05, not analyzed	89.7109	98.7867	78.5709	63.2223	46.1093	45.3143	-0.794786	0.265924	-2.98877	0.00280102	0.296262
WBGene00020808	clik-1	T25F10.6	p > 0.05, not analyzed	p > 0.05, not analyzed	2300.74	2071.6	2339.88	1303.7	1885.75	1855.78	-0.410921	0.137426	-2.99013	0.00278862	0.296262
WBGene00003514	myo-2	T18D3.4	p > 0.05, not analyzed	p > 0.05, not analyzed	436.089	282.784	315.419	216.362	288.611	178.061	-0.596061	0.200735	-2.96939	0.00298395	0.308036
WBGene00019357	cpg-8	K03B4.7	p > 0.05, not analyzed	p > 0.05, not analyzed	607.475	635.05	671.131	765.608	804.826	876.183	0.354216	0.119231	2.97084	0.00296988	0.308036
WBGene00000066	act-4	M03F4.2	p > 0.05, not analyzed	p > 0.05, not analyzed	2628.95	2088.2	2217.38	1493.47	1839.28	1978.14	-0.383636	0.129974	-2.95163	0.00316097	0.314224
WBGene00003963	pdi-2	C07A12.4	p > 0.05, not analyzed	p > 0.05, not analyzed	2717.69	2794.99	2633.99	2379.68	1888.09	2221.17	-0.328632	0.11133	-2.95186	0.00315863	0.314224
WBGene00010049	F54D5.3	F54D5.3	p > 0.05, not analyzed	p > 0.05, not analyzed	568.987	589.925	676.211	710.002	818.36	864.705	0.382631	0.129585	2.95274	0.00314968	0.314224
WBGene00012834	Y43F8C.13	Y43F8C.13	p > 0.05, not analyzed	p > 0.05, not analyzed	198.811	191.117	148.92	133.975	122.468	98.6494	-0.602307	0.203996	-2.95254	0.00315171	0.314224
WBGene00018488	acs-1	F46E10.1	p > 0.05, not analyzed	p > 0.05, not analyzed	1534.72	1423.72	1179.9	1124.44	1013.13	1077.9	-0.363257	0.12297	-2.95402	0.00313662	0.314224
WBGene00018237	irg-7	F40F4.6	p > 0.05, not analyzed	p > 0.05, not analyzed	4369.9	3533.3	3391.14	3064.83	3132.69	2577.51	-0.36392	0.123752	-2.94072	0.00327452	0.323118
WBGene00009397	clec-66	F35C5.9	p > 0.05, not analyzed	p > 0.05, not analyzed	85.9702	86.6322	86.0891	48.2254	61.9244	39.5263	-0.789476	0.269422	-2.93026	0.00338682	0.33176
WBGene00018024	F35A5.1	F35A5.1	p > 0.05, not analyzed	p > 0.05, not analyzed	109.647	104.159	87.7967	50.3408	80.0959	39.9276	-0.819433	0.280077	-2.92574	0.00343633	0.334171
WBGene00001891	his-17	K06C4.5	p > 0.05, not analyzed	p > 0.05, not analyzed	1075.15	1069.65	1129.72	1193.22	1371.78	1760.52	0.402238	0.137966	2.91549	0.00355134	0.339295
WBGene00004037	plc-2	Y75B12B.6	p > 0.05, not analyzed	p > 0.05, not analyzed	92.312	72.0903	63.5105	37.4945	40.6339	48.4068	-0.838363	0.28789	-2.91209	0.00359016	0.339295
WBGene00017445	sid-5	F14B8.2	p > 0.05, not analyzed	p > 0.05, not analyzed	48.7015	37.7343	53.2903	70.805	78.4867	96.1253	0.814359	0.279514	2.91348	0.00357423	0.339295
WBGene00019097	F59B1.2	F59B1.2	p > 0.05, not analyzed	p > 0.05, not analyzed	596.033	511.097	466.581	398.958	401.101	389.904	-0.401027	0.137638	-2.91364	0.00357238	0.339295
WBGene00002247	lam-1	W03F8.5	p > 0.05, not analyzed	p > 0.05, not analyzed	2025.02	1317.23	1511.23	833.369	1436.68	1115.82	-0.51816	0.178801	-2.89798	0.00375575	0.350531
WBGene00006561	tcl-2	Y38C1AA.4	p > 0.05, not analyzed	p > 0.05, not analyzed	71.6652	98.4936	80.4235	129.146	119.471	143.647	0.644717	0.222604	2.89625	0.00377648	0.350531
WBGene00009888	F49E2.5	F49E2.5	p > 0.05, not analyzed	p > 0.05, not analyzed	398.969	339.885	343.239	226.349	274.817	288.406	-0.450207	0.155493	-2.89535	0.00378741	0.350531
WBGene00017101	E02H9.3	E02H9.3	p > 0.05, not analyzed	p > 0.05, not analyzed	269.123	305.406	272.637	201.755	207.091	210.906	-0.450604	0.155772	-2.89272	0.00381925	0.351057
WBGene00018303	F41G3.10	F41G3.10	p > 0.05, not analyzed	p > 0.05, not analyzed	170.125	127.166	138.368	88.9936	102.564	92.7583	-0.610722	0.211385	-2.88915	0.00386289	0.352653
WBGene00002271	lec-8	R07B1.10	p > 0.05, not analyzed	p > 0.05, not analyzed	553.521	571.385	488.806	451.487	374.631	403.894	-0.392279	0.136476	-2.87434	0.00404873	0.367122
WBGene00014006	srlf-30	ZK596.1	p > 0.05, not analyzed	p > 0.05, not analyzed	101.626	87.7614	86.3358	65.4015	54.7315	45.0407	-0.743589	0.259003	-2.87097	0.00409215	0.368568
WBGene00015057	gad-3	B0222.9	p > 0.05, not analyzed	p > 0.05, not analyzed	302.903	249.433	289.963	196.028	220.108	194.191	-0.46344	0.161754	-2.86509	0.00416891	0.372979
WBGene00010185	F57A10.4	F57A10.4	p > 0.05, not analyzed	p > 0.05, not analyzed	78.319	89.7129	125.997	115.801	168.976	190.72	0.690611	0.241512	2.85953	0.00424266	0.377063
WBGene00011059	R06C1.4	R06C1.4	p > 0.05, not analyzed	p > 0.05, not analyzed	803.205	842.929	906.906	995.771	1098.21	1102.14	0.323644	0.113518	2.85104	0.00435768	0.380102
WBGene00012608	hphd-1	Y38F1A.6	p > 0.05, not analyzed	p > 0.05, not analyzed	4772.65	4266.37	4120.69	3615.06	3675.09	3529.63	-0.282152	0.0989751	-2.85074	0.00436182	0.380102
WBGene00021886	Y54G2A.21	Y54G2A.21	p > 0.05, not analyzed	p > 0.05, not analyzed	195.719	190.124	154.003	140.334	113.215	112.636	-0.561411	0.196681	-2.85443	0.00431146	0.380102
WBGene00012970	Y48A6B.9	Y48A6B.9	p > 0.05, not analyzed	p > 0.05, not analyzed	63.2508	65.7714	53.8082	39.8693	30.8042	28.0945	-0.891344	0.313368	-2.8444	0.00444954	0.385244
WBGene00013080	Y51A2D.13	Y51A2D.13	p > 0.05, not analyzed	p > 0.05, not analyzed	308.539	339.047	210.951	212.16	192.934	188.637	-0.530499	0.187349	-2.83161	0.00463137	0.398416
WBGene00014163	rnh-1.2	ZK938.7	p > 0.05, not analyzed	p > 0.05, not analyzed	224.179	229.469	326.8	296.967	389.423	439.467	0.527286	0.186494	2.82737	0.00469324	0.401167
WBGene00000114	alh-8	F13D12.4	p > 0.05, not analyzed	p > 0.05, not analyzed	6177.43	5639.96	5268.02	4760.59	4436.02	4835.45	-0.283817	0.10074	-2.81732	0.00484261	0.401617
WBGene00001156	ech-7	Y105E8A.4	p > 0.05, not analyzed	p > 0.05, not analyzed	566.749	630.801	568.835	455.682	484.274	439.766	-0.356509	0.126342	-2.82179	0.00477569	0.401617
WBGene00001770	gst-22	F21H7.1	p > 0.05, not analyzed	p > 0.05, not analyzed	26.9124	37.3293	36.9112	13.9397	11.5173	17.9019	-1.22394	0.434052	-2.8198	0.00480542	0.401617
WBGene00007075	AC8.3	AC8.3	p > 0.05, not analyzed	p > 0.05, not analyzed	2.45455	2.15984	0	6.43077	17.4929	9.27353	2.91991	1.03655	2.81696	0.00484813	0.401617
WBGene00022307	nadk-1	Y77E11A.2	p > 0.05, not analyzed	p > 0.05, not analyzed	146.137	124.493	144.405	100.739	81.1397	93.3767	-0.595121	0.210928	-2.82144	0.00478091	0.401617
WBGene00003242	mig-6	C37C3.6	p > 0.05, not analyzed	p > 0.05, not analyzed	759.474	771.331	644.525	561.479	599.792	536.817	-0.356085	0.126766	-2.809	0.00496949	0.409059
WBGene00015116	paic-1	B0286.3	p > 0.05, not analyzed	p > 0.05, not analyzed	319.414	272.129	336.023	242.187	215.168	226.829	-0.441095	0.157135	-2.8071	0.00499893	0.409059
WBGene00001501	ftn-2	D1037.3	p > 0.05, not analyzed	p > 0.05, not analyzed	1027.56	1017.23	973.695	894.4	772.567	736.047	-0.330051	0.118416	-2.78723	0.00531612	0.429873
WBGene00002978	lev-11	Y105E8B.1	p > 0.05, not analyzed	p > 0.05, not analyzed	1931.24	1622.13	1689.53	1139.49	1472.01	1480.3	-0.356338	0.12785	-2.78715	0.00531735	0.429873
WBGene00010964	ctc-1	MTCE.26	p > 0.05, not analyzed	p > 0.05, not analyzed	31766.1	30121.7	40146.1	39749.8	41288.2	48721.8	0.346774	0.124757	2.77959	0.00544281	0.432204
WBGene00019439	K06B9.2	K06B9.2	p > 0.05, not analyzed	p > 0.05, not analyzed	24.5737	29.2886	17.2384	9.64439	5.22389	10.0765	-1.51211	0.543933	-2.77996	0.00543648	0.432204
WBGene00019727	zig-12	M02D8.1	p > 0.05, not analyzed	p > 0.05, not analyzed	368.656	326.793	390.238	234.793	318.312	237.714	-0.456081	0.164043	-2.78025	0.00543175	0.432204
WBGene00000088	aex-5	F32A7.6	p > 0.05, not analyzed	p > 0.05, not analyzed	159.84	124.002	107.465	86.7892	88.558	77.9034	-0.623312	0.22696	-2.74636	0.00602613	0.444368
WBGene00000270	bre-5	T12G3.8	p > 0.05, not analyzed	p > 0.05, not analyzed	226.265	225.494	234.127	272.481	336.581	313.954	0.429505	0.155546	2.76128	0.0057576	0.444368
WBGene00001390	far-6	W02A2.2	p > 0.05, not analyzed	p > 0.05, not analyzed	292.933	239.6	251.151	176.881	206.618	185.465	-0.458307	0.166527	-2.75215	0.00592051	0.444368
WBGene00001814	haf-4	W04C9.1	p > 0.05, not analyzed	p > 0.05, not analyzed	204.721	211.595	153.71	153.417	120.763	112.427	-0.562726	0.203375	-2.76694	0.0056585	0.444368
WBGene00001931	his-57	F54E12.5	p > 0.05, not analyzed	p > 0.05, not analyzed	11954.4	14116.1	14511.7	13910.5	18604.3	19633.5	0.361791	0.131183	2.75791	0.00581727	0.444368
WBGene00004305	ran-4	R05D11.3	p > 0.05, not analyzed	p > 0.05, not analyzed	782.952	839.999	936.138	1051.01	1055.09	1085.51	0.317361	0.114741	2.76589	0.00567682	0.444368
WBGene00004985	spo-11	T05E11.4	p > 0.05, not analyzed	p > 0.05, not analyzed	587.498	539.906	683.724	730.026	745.609	857.973	0.365322	0.132816	2.75058	0.00594891	0.444368
WBGene00006930	vit-6	K07H8.6	p > 0.05, not analyzed	p > 0.05, not analyzed	110424	98301	73400.3	79064.7	66797.1	72387.5	-0.370348	0.134689	-2.74964	0.00596599	0.444368
WBGene00007764	C27B7.7	C27B7.7	p > 0.05, not analyzed	p > 0.05, not analyzed	99.1326	91.3948	110.391	53.8542	78.4163	51.8052	-0.707176	0.255931	-2.76315	0.0057246	0.444368
WBGene00008027	scl-5	C39E9.2	p > 0.05, not analyzed	p > 0.05, not analyzed	51.3473	34.0519	42.5219	17.1578	20.4251	23.9177	-1.04569	0.380758	-2.74634	0.00602645	0.444368
WBGene00012544	Y37D8A.2	Y37D8A.2	p > 0.05, not analyzed	p > 0.05, not analyzed	1192.69	949.728	1025.82	842.172	893.269	752.137	-0.348375	0.126552	-2.75282	0.0059085	0.444368
WBGene00015577	ugt-64	C07G3.9	p > 0.05, not analyzed	p > 0.05, not analyzed	366.293	314.101	309.301	257.956	244.985	238.961	-0.414536	0.150806	-2.7488	0.00598145	0.444368
WBGene00017459	F14D2.11	F14D2.11	p > 0.05, not analyzed	p > 0.05, not analyzed	40.3469	40.4465	64.2663	56.8349	82.5676	129.81	0.890379	0.32333	2.75378	0.00589119	0.444368
WBGene00044649	C23H5.11	C23H5.11	p > 0.05, not analyzed	p > 0.05, not analyzed	1.33036	0.586536	1.03618	0.580424	2.36175	126.314	5.28445	1.9311	2.7365	0.00620975	0.455382
WBGene00011050	agl-1	R06A4.8	p > 0.05, not analyzed	p > 0.05, not analyzed	1303.15	1542.31	1164.91	1116.09	749.008	1119.37	-0.42658	0.15634	-2.72854	0.00636152	0.458987
WBGene00012339	W07G4.5	W07G4.5	p > 0.05, not analyzed	p > 0.05, not analyzed	235.634	190.055	201.436	158.626	152.196	134.894	-0.492491	0.180272	-2.73193	0.0062965	0.458987
WBGene00017487	F15E6.6	F15E6.6	p > 0.05, not analyzed	p > 0.05, not analyzed	125.597	119.259	110.791	94.2646	67.32	69.169	-0.629966	0.230878	-2.72857	0.00636093	0.458987
WBGene00004774	sem-5	C14F5.5	p > 0.05, not analyzed	p > 0.05, not analyzed	331.745	328.686	314.123	421.138	438.802	398.857	0.369803	0.1359	2.72114	0.00650581	0.466887
WBGene00011006	ugt-47	R04B5.9	p > 0.05, not analyzed	p > 0.05, not analyzed	282.725	242.332	208.074	176.8	185.113	164.324	-0.475049	0.17549	-2.70699	0.00678967	0.484667
WBGene00015692	ugt-25	C10H11.3	p > 0.05, not analyzed	p > 0.05, not analyzed	147.509	97.8034	166.845	105.009	79.9535	77.9691	-0.655424	0.242337	-2.7046	0.00683865	0.484694
WBGene00022609	ZC416.2	ZC416.2	p > 0.05, not analyzed	p > 0.05, not analyzed	6.03838	6.12268	3.66761	11.8036	16.6925	24.9015	1.7757	0.656826	2.70345	0.00686228	0.484694
WBGene00001645	gly-20	C03E10.4	p > 0.05, not analyzed	p > 0.05, not analyzed	1403.08	1449.57	1482.94	1776.46	1725.17	1718.17	0.267238	0.0991517	2.69524	0.00703376	0.492861
WBGene00009493	hrg-4	F36H1.5	p > 0.05, not analyzed	p > 0.05, not analyzed	23.2567	19.9648	35.8379	47.3454	44.885	63.1554	0.967222	0.359205	2.69268	0.00708809	0.492861
WBGene00012251	clec-49	W04E12.6	p > 0.05, not analyzed	p > 0.05, not analyzed	119.005	81.9647	102.06	72.8859	63.0602	53.1748	-0.683071	0.253632	-2.69316	0.00707781	0.492861
WBGene00001328	epi-1	K08C7.3	p > 0.05, not analyzed	p > 0.05, not analyzed	1538.75	1275.66	1351.41	952.23	1299.28	969.505	-0.369964	0.137886	-2.68311	0.00729404	0.504567
WBGene00009968	fig-1	F53B7.5	p > 0.05, not analyzed	p > 0.05, not analyzed	87.8351	113.079	121.496	65.606	81.4973	56.677	-0.66697	0.248988	-2.67872	0.00739047	0.505393
WBGene00011755	T13H5.1	T13H5.1	p > 0.05, not analyzed	p > 0.05, not analyzed	123.313	95.8604	99.3303	76.2794	54.7437	71.7185	-0.656676	0.245191	-2.67822	0.00740149	0.505393
WBGene00013055	Y50E8A.12	Y50E8A.12	p > 0.05, not analyzed	p > 0.05, not analyzed	15.2581	21.3677	2.48508	1.40314	1.15413	2.22244	-2.59337	0.968605	-2.67743	0.00741896	0.505393
WBGene00002031	hst-6	Y34B4A.3	p > 0.05, not analyzed	p > 0.05, not analyzed	132.647	123.476	156.896	181.112	170.911	248.886	0.540611	0.202847	2.66512	0.00769604	0.516251
WBGene00008371	D1054.3	D1054.3	p > 0.05, not analyzed	p > 0.05, not analyzed	798.581	858.234	1080.22	921.89	1271.18	1530.42	0.443539	0.166664	2.66128	0.00778449	0.516251
WBGene00010337	serp-1.1	F59F4.2	p > 0.05, not analyzed	p > 0.05, not analyzed	288.153	275.368	225.458	221.017	168.659	180.956	-0.467843	0.175977	-2.65856	0.00784763	0.516251
WBGene00015752	C14B9.2	C14B9.2	p > 0.05, not analyzed	p > 0.05, not analyzed	515.394	379.166	432.279	335.346	346.698	325.374	-0.395615	0.148686	-2.66075	0.00779667	0.516251
WBGene00018877	aman-1	F55D10.1	p > 0.05, not analyzed	p > 0.05, not analyzed	295.411	222.862	238.673	208.896	188.44	124.337	-0.539634	0.202901	-2.6596	0.00782335	0.516251
WBGene00019869	cnnm-2	R04E5.2	p > 0.05, not analyzed	p > 0.05, not analyzed	140.27	132.001	99.0295	81.4213	87.4302	73.5254	-0.61123	0.229122	-2.66771	0.00763711	0.516251
WBGene00020093	R144.3	R144.3	p > 0.05, not analyzed	p > 0.05, not analyzed	256.604	282.337	311.74	332.362	374.447	424.869	0.411336	0.154444	2.66333	0.00773709	0.516251
WBGene00014095	gdh-1	ZK829.4	p > 0.05, not analyzed	p > 0.05, not analyzed	1683.59	1576.36	1339.29	1245.01	1102.57	1319.2	-0.326061	0.122751	-2.65629	0.00790066	0.517204
WBGene00011936	pgrn-1	T22H2.6	p > 0.05, not analyzed	p > 0.05, not analyzed	173.09	191.333	139.483	117.893	103.104	125.505	-0.537831	0.20263	-2.65426	0.00794834	0.517799
WBGene00000967	dhs-3	T02E1.5	p > 0.05, not analyzed	p > 0.05, not analyzed	293.767	314	330.927	420.172	412.466	381.484	0.368694	0.139302	2.64672	0.00812762	0.522464
WBGene00004332	rec-1	Y18H1A.7	p > 0.05, not analyzed	p > 0.05, not analyzed	80.0281	94.3009	73.8843	144.53	196.595	82.793	0.727817	0.275027	2.64634	0.00813673	0.522464
WBGene00022505	idpp-15	ZC21.3	p > 0.05, not analyzed	p > 0.05, not analyzed	23.7226	20.5828	12.9375	8.77557	7.07264	2.27954	-1.67866	0.63373	-2.64886	0.00807632	0.522464
WBGene00003870	ooc-5	C18E9.11	p > 0.05, not analyzed	p > 0.05, not analyzed	1054.29	1100.33	1259.14	1300.99	1374.45	1592.59	0.321926	0.121747	2.64421	0.0081881	0.523259
WBGene00007197	prdh-1	B0513.5	p > 0.05, not analyzed	p > 0.05, not analyzed	279.362	204.69	265.269	160.957	205.486	169.498	-0.480259	0.182172	-2.63629	0.00838173	0.526023
WBGene00012552	enu-3.5	Y37D8A.12	p > 0.05, not analyzed	p > 0.05, not analyzed	79.1596	76.5101	66.6914	47.6702	51.6653	31.3203	-0.769752	0.29159	-2.63985	0.00829438	0.526023
WBGene00013575	acs-5	Y76A2B.3	p > 0.05, not analyzed	p > 0.05, not analyzed	752.815	657.075	615.805	505.695	539.055	555.341	-0.337712	0.128114	-2.63603	0.00838815	0.526023
WBGene00020930	hlh-30	W02C12.3	p > 0.05, not analyzed	p > 0.05, not analyzed	152.51	97.2783	122.169	82.5015	80.2995	80.3762	-0.609833	0.231297	-2.63657	0.00837477	0.526023
WBGene00000829	ctb-1	MTCE.21	p > 0.05, not analyzed	p > 0.05, not analyzed	13553.6	13362.3	17971.8	16468.2	18875.5	22006.1	0.353436	0.135092	2.61627	0.00888974	0.529891
WBGene00001918	his-44	F08G2.1	p > 0.05, not analyzed	p > 0.05, not analyzed	3060.88	3519.38	2743.31	2963.73	1930.23	2251.12	-0.384314	0.146892	-2.6163	0.00888891	0.529891
WBGene00003081	lsm-7	ZK593.7	p > 0.05, not analyzed	p > 0.05, not analyzed	278.638	311.204	420.206	375.56	449.019	594.204	0.488745	0.186868	2.61545	0.00891088	0.529891
WBGene00003956	pcp-1	ZK112.1	p > 0.05, not analyzed	p > 0.05, not analyzed	538.516	563.359	572.764	439.307	460.23	437.326	-0.325432	0.123917	-2.62621	0.00863416	0.529891
WBGene00004781	set-1	T26A5.7	p > 0.05, not analyzed	p > 0.05, not analyzed	1392.81	1424.47	1630.57	1719.65	1727.35	2071.59	0.310947	0.118452	2.62508	0.00866293	0.529891
WBGene00004990	spp-5	T08A9.9	p > 0.05, not analyzed	p > 0.05, not analyzed	1650	1660.09	2258.47	2102.06	2516.11	2509.28	0.355528	0.135791	2.6182	0.00883955	0.529891
WBGene00011635	mdmh-35	T09A5.7	p > 0.05, not analyzed	p > 0.05, not analyzed	244.417	290.102	337.372	334.742	367.977	505.224	0.469176	0.179274	2.61708	0.00886845	0.529891
WBGene00012812	Y43F8B.1	Y43F8B.1	p > 0.05, not analyzed	p > 0.05, not analyzed	433.702	397.62	418.142	278.384	357.158	322.687	-0.380051	0.145249	-2.61654	0.00888248	0.529891
WBGene00018007	F33D11.10	F33D11.10	p > 0.05, not analyzed	p > 0.05, not analyzed	1801.04	1836.74	2236.44	2230.04	2337.05	2821.73	0.330719	0.126126	2.62213	0.00873813	0.529891
WBGene00019234	ugt-8	H23N18.3	p > 0.05, not analyzed	p > 0.05, not analyzed	158.6	119.62	218.729	131.793	91.1868	100.544	-0.627593	0.239116	-2.62464	0.00867394	0.529891
WBGene00020280	T06A1.5	T06A1.5	p > 0.05, not analyzed	p > 0.05, not analyzed	83.5785	64.0854	69.9751	37.5038	40.8654	50.3236	-0.749529	0.285987	-2.62085	0.00877114	0.529891
WBGene00020718	mrps-2	T23B12.3	p > 0.05, not analyzed	p > 0.05, not analyzed	462.145	523.559	602.44	617.462	646.718	810.033	0.384354	0.146983	2.61497	0.00892365	0.529891
WBGene00016192	bcl-7	C28H8.1	p > 0.05, not analyzed	p > 0.05, not analyzed	317.565	404.03	508.082	427.913	574.866	748.908	0.509538	0.195157	2.61091	0.00903024	0.533858
WBGene00007455	ugt-22	C08F11.8	p > 0.05, not analyzed	p > 0.05, not analyzed	1200.46	1126.31	914.345	1484.97	1418.37	1203.91	0.34234	0.131565	2.60207	0.00926636	0.545415
WBGene00009673	F43G9.13	F43G9.13	p > 0.05, not analyzed	p > 0.05, not analyzed	177.726	166.551	256.043	241.382	245.555	404.674	0.56943	0.219396	2.59545	0.00944671	0.553037
WBGene00016434	C35B1.4	C35B1.4	p > 0.05, not analyzed	p > 0.05, not analyzed	200.452	263.684	351.102	292.871	379.187	533.597	0.562116	0.216673	2.5943	0.00947827	0.553037
WBGene00013855	cubn-1	ZC116.3	p > 0.05, not analyzed	p > 0.05, not analyzed	174.987	155.85	135.167	113.529	123.891	51.5267	-0.69227	0.26776	-2.58541	0.00972625	0.565049
WBGene00020235	T05A12.4	T05A12.4	p > 0.05, not analyzed	p > 0.05, not analyzed	443.839	395.802	350.325	544.306	503.958	477.643	0.360253	0.139519	2.58211	0.00981994	0.568033
WBGene00015293	C01C4.3	C01C4.3	p > 0.05, not analyzed	p > 0.05, not analyzed	53.6076	26.6671	39.4371	19.8713	19.1895	19.0627	-1.03647	0.402045	-2.578	0.00993738	0.572097
WBGene00020732	T23E7.2	T23E7.2	p > 0.05, not analyzed	p > 0.05, not analyzed	215.02	158.492	162.96	80.2209	128.854	144.53	-0.586038	0.227439	-2.57668	0.00997546	0.572097
WBGene00004112	pqn-22	C46G7.4	p > 0.05, not analyzed	p > 0.05, not analyzed	509.81	374.909	412.564	282.899	378.988	305.44	-0.418876	0.163353	-2.56423	0.0103404	0.577759
WBGene00006929	vit-5	C04F6.1	p > 0.05, not analyzed	p > 0.05, not analyzed	54313.5	46629.3	35153.7	36800.1	33383.8	36798.1	-0.347224	0.135238	-2.5675	0.0102434	0.577759
WBGene00007785	tofu-1	C27H6.3	p > 0.05, not analyzed	p > 0.05, not analyzed	663.509	693.246	708.747	861.561	861.836	806.873	0.291788	0.113478	2.57131	0.0101315	0.577759
WBGene00011737	sqst-1	T12G3.1	p > 0.05, not analyzed	p > 0.05, not analyzed	499.512	426.05	432.235	329.813	369.692	360.135	-0.354736	0.138379	-2.56351	0.0103621	0.577759
WBGene00019917	clec-43	R07C3.1	p > 0.05, not analyzed	p > 0.05, not analyzed	33.1948	19.573	8.63365	6.42892	3.47402	9.21704	-1.66545	0.648911	-2.56652	0.0102723	0.577759
WBGene00022069	eel-1	Y67D8C.5	p > 0.05, not analyzed	p > 0.05, not analyzed	6916.22	8189.49	5989.07	6070.86	5254.06	5669.19	-0.311858	0.121674	-2.56306	0.0103756	0.577759
WBGene00044696	F52E1.14	F52E1.14	p > 0.05, not analyzed	p > 0.05, not analyzed	781.386	894.612	1081.64	1083.06	1204.92	1204.38	0.339404	0.132101	2.56926	0.0101915	0.577759
WBGene00012747	Y40H7A.10	Y40H7A.10	p > 0.05, not analyzed	p > 0.05, not analyzed	466.293	403.646	491.47	316.187	351.823	384.635	-0.369539	0.144321	-2.56054	0.0104511	0.579561
WBGene00010150	F56D5.6	F56D5.6	p > 0.05, not analyzed	p > 0.05, not analyzed	105.068	146.494	111.073	93.0618	79.1314	67.0705	-0.603429	0.235842	-2.55862	0.0105088	0.580363
WBGene00010962	ctc-3	MTCE.23	p > 0.05, not analyzed	p > 0.05, not analyzed	8491.24	8162.26	11795	10058.3	11956.8	15713.8	0.407286	0.159602	2.55189	0.0107139	0.589264
WBGene00018393	msra-1	F43E2.5	p > 0.05, not analyzed	p > 0.05, not analyzed	2813.28	2459.79	3644.27	3477.65	3651.62	4287.16	0.356202	0.139685	2.55004	0.0107712	0.589997
WBGene00008232	C50F4.4	C50F4.4	p > 0.05, not analyzed	p > 0.05, not analyzed	122.483	141.458	166.182	167.249	197.474	249.558	0.51314	0.202446	2.5347	0.0112542	0.61395
WBGene00000615	col-38	F54C9.4	p > 0.05, not analyzed	p > 0.05, not analyzed	22.065	43.0004	34.2606	17.1517	14.9387	14.39	-1.1063	0.437819	-2.52684	0.0115095	0.624144
WBGene00002143	inx-21	Y47G6A.1	p > 0.05, not analyzed	p > 0.05, not analyzed	383.521	380.335	381.625	541.117	438.02	477.888	0.345357	0.136761	2.52527	0.0115611	0.624144
WBGene00003515	myo-3	K12F2.1	p > 0.05, not analyzed	p > 0.05, not analyzed	1061.86	859.222	805.369	673.724	842.664	542.554	-0.404126	0.160071	-2.52467	0.0115806	0.624144
WBGene00003064	nfu-1	R10H10.1	p > 0.05, not analyzed	p > 0.05, not analyzed	629.155	620.026	813.357	721.59	872.345	1164.63	0.41958	0.16702	2.51216	0.0119996	0.64414
WBGene00016380	ntp-1	C33H5.14	p > 0.05, not analyzed	p > 0.05, not analyzed	672.517	641.945	753.658	841.712	802.465	909.2	0.303346	0.121351	2.49974	0.0124283	0.664495
WBGene00011474	aldo-1	T05D4.1	p > 0.05, not analyzed	p > 0.05, not analyzed	444.509	327.888	352.793	232.56	270.569	329.872	-0.428644	0.171685	-2.49669	0.0125358	0.667583
WBGene00013154	Y53F4B.7	Y53F4B.7	p > 0.05, not analyzed	p > 0.05, not analyzed	18.2169	20.78	28.8009	4.29184	8.19408	13.098	-1.39175	0.558397	-2.49239	0.0126886	0.667768
WBGene00013439	Y66D12A.13	Y66D12A.13	p > 0.05, not analyzed	p > 0.05, not analyzed	51.6286	51.0767	36.4381	25.7164	23.4639	25.989	-0.883665	0.354173	-2.49501	0.0125955	0.667768
WBGene00018794	attf-3	F54C4.3	p > 0.05, not analyzed	p > 0.05, not analyzed	384.229	442.249	379.714	355.626	277.767	298.209	-0.375483	0.150608	-2.49312	0.0126628	0.667768
WBGene00015050	clec-51	B0218.6	p > 0.05, not analyzed	p > 0.05, not analyzed	123.426	94.5098	129.116	78.4216	71.4412	83.1748	-0.574955	0.231542	-2.48315	0.0130225	0.682662
WBGene00001225	eif-3.B	Y54E2A.11	p > 0.05, not analyzed	p > 0.05, not analyzed	1815.11	2209.06	1834.08	1812.71	1199.2	1565.09	-0.356893	0.144358	-2.47228	0.0134255	0.701049
WBGene00001775	gst-27	Y53F4B.30	p > 0.05, not analyzed	p > 0.05, not analyzed	353.618	357.626	329.575	269.134	271.724	274.268	-0.3515	0.142365	-2.469	0.013549	0.702035
WBGene00017007	D1007.10	D1007.10	p > 0.05, not analyzed	p > 0.05, not analyzed	206.301	190.958	197.836	226.114	303.072	264.81	0.417375	0.169036	2.46915	0.0135434	0.702035
WBGene00010540	2024-12-07	K03H1.5	p > 0.05, not analyzed	p > 0.05, not analyzed	96.0558	88.6638	79.0237	56.7718	58.6623	55.8129	-0.619729	0.25135	-2.4656	0.0136784	0.703155
WBGene00010709	nol-9	K09B11.2	p > 0.05, not analyzed	p > 0.05, not analyzed	395.429	453.94	410.768	558.903	502.422	515.401	0.322468	0.131	2.46158	0.0138326	0.703155
WBGene00014228	mett-10	ZK1128.2	p > 0.05, not analyzed	p > 0.05, not analyzed	399.019	421.877	459.544	552.671	509.946	537.417	0.31925	0.129421	2.46675	0.0136345	0.703155
WBGene00015894	acdh-2	C17C3.12	p > 0.05, not analyzed	p > 0.05, not analyzed	650.513	557.584	794.573	490.011	483.375	579.013	-0.367955	0.149415	-2.46264	0.013792	0.703155
WBGene00018605	try-14	F48E3.4	p > 0.05, not analyzed	p > 0.05, not analyzed	1893.24	2000.33	2268.85	2328.02	2376.89	2820.61	0.288069	0.117015	2.46181	0.0138239	0.703155
WBGene00008343	C56A3.4	C56A3.4	p > 0.05, not analyzed	p > 0.05, not analyzed	350.821	326.323	371.149	405.928	419.153	522.289	0.363106	0.147755	2.45749	0.0139913	0.708542
WBGene00009011	F21D5.6	F21D5.6	p > 0.05, not analyzed	p > 0.05, not analyzed	712.687	718.894	738.891	794.262	922.853	935.727	0.290402	0.118383	2.45307	0.0141644	0.711272
WBGene00012911	acl-7	Y46G5A.21	p > 0.05, not analyzed	p > 0.05, not analyzed	298.883	253.797	218.019	201.424	182.934	189.918	-0.421881	0.1721	-2.45137	0.0142315	0.711272
WBGene00022083	Y69A2AR.12	Y69A2AR.12	p > 0.05, not analyzed	p > 0.05, not analyzed	6.14628	6.52052	12.4658	17.1442	19.1184	30.1804	1.38818	0.566439	2.45072	0.0142572	0.711272
WBGene00050947	K07C5.13	K07C5.13	p > 0.05, not analyzed	p > 0.05, not analyzed	3.47432	2.41585	3.75637	2.43942	4.04833	158.27	3.9579	1.61362	2.45281	0.0141746	0.711272
WBGene00017591	nspg-10	F19C7.1	p > 0.05, not analyzed	p > 0.05, not analyzed	733.558	734.049	607.359	600.25	525.794	536.227	-0.319756	0.130642	-2.44757	0.0143824	0.714859
WBGene00003169	mec-5	E03G2.3	p > 0.05, not analyzed	p > 0.05, not analyzed	84.6833	77.7583	86.882	42.8717	64.7199	50.5804	-0.651105	0.267474	-2.43427	0.0149218	0.717742
WBGene00004728	sax-2	F21H11.2	p > 0.05, not analyzed	p > 0.05, not analyzed	3192.54	3055.12	2608.38	3478.96	3561.26	3548.43	0.258257	0.105876	2.43923	0.0147185	0.717742
WBGene00007334	C05C10.7	C05C10.7	p > 0.05, not analyzed	p > 0.05, not analyzed	111.307	147.121	176.932	166.207	202.086	260.1	0.526855	0.215733	2.44216	0.0145995	0.717742
WBGene00015353	C02F5.13	C02F5.13	p > 0.05, not analyzed	p > 0.05, not analyzed	290.173	246.119	367.121	344.164	399.962	468.323	0.424003	0.173573	2.44279	0.0145741	0.717742
WBGene00016838	C50F2.4	C50F2.4	p > 0.05, not analyzed	p > 0.05, not analyzed	86.0229	65.1306	89.1075	49.2921	56.5523	46.1557	-0.660656	0.271244	-2.43565	0.0148651	0.717742
WBGene00018346	F42C5.4	F42C5.4	p > 0.05, not analyzed	p > 0.05, not analyzed	14.9572	16.0969	20.8586	33.6514	36.8696	33.9266	0.999572	0.410466	2.43521	0.0148832	0.717742
WBGene00019593	K09F6.10	K09F6.10	p > 0.05, not analyzed	p > 0.05, not analyzed	83.3273	68.7886	93.5825	52.7516	55.2232	49.591	-0.644308	0.264569	-2.43531	0.0148792	0.717742
WBGene00020886	ttr-6	T28B4.3	p > 0.05, not analyzed	p > 0.05, not analyzed	331.777	252.191	309.046	209.161	232.932	234.978	-0.396631	0.162905	-2.43474	0.0149024	0.717742
WBGene00020931	cytb-5.2	W02D3.1	p > 0.05, not analyzed	p > 0.05, not analyzed	469.279	486.235	642.277	579.253	696.188	812.729	0.385394	0.158305	2.43451	0.0149121	0.717742
WBGene00001983	hoe-1	E04A4.4	p > 0.05, not analyzed	p > 0.05, not analyzed	1653.67	1659.93	1534.6	1975.17	1883.87	1878.57	0.242998	0.100094	2.4277	0.0151948	0.723102
WBGene00015342	C02E7.10	C02E7.10	p > 0.05, not analyzed	p > 0.05, not analyzed	0	1.03938	1.85855	10.7295	1.82026	12.2207	3.01346	1.24106	2.42814	0.0151765	0.723102
WBGene00022252	Y73B6BL.31	Y73B6BL.31	p > 0.05, not analyzed	p > 0.05, not analyzed	336.489	301.588	312.971	241.875	253.733	245.395	-0.358323	0.147582	-2.42796	0.0151838	0.723102
WBGene00001395	fat-3	W08D2.4	p > 0.05, not analyzed	p > 0.05, not analyzed	1107.93	958.174	1187.35	884.681	873.701	907.174	-0.286785	0.118262	-2.425	0.0153086	0.72559
WBGene00001755	gst-7	F11G11.2	p > 0.05, not analyzed	p > 0.05, not analyzed	1316.64	1398.68	1403.68	1610.51	1577	1704.15	0.247765	0.102272	2.42261	0.0154093	0.72559
WBGene00008275	nstp-1	C53B4.6	p > 0.05, not analyzed	p > 0.05, not analyzed	117.504	121.711	141.672	165.174	169.915	189.028	0.458758	0.18931	2.42332	0.0153795	0.72559
WBGene00008849	try-10	F15B9.5	p > 0.05, not analyzed	p > 0.05, not analyzed	80.0548	47.431	43.4821	91.1744	85.609	85.7532	0.672874	0.27821	2.41858	0.0155813	0.728574
WBGene00045038	ule-2	F13G11.3	p > 0.05, not analyzed	p > 0.05, not analyzed	898.538	832.023	1034.52	984.265	1095.5	1481.41	0.365445	0.151088	2.41876	0.0155736	0.728574
WBGene00003093	lys-4	F58B3.1	p > 0.05, not analyzed	p > 0.05, not analyzed	3391.25	3483.3	4614.28	4319.78	4959.78	4943.59	0.307712	0.12749	2.41361	0.0157953	0.736017
WBGene00002038	hum-5	T02C12.1	p > 0.05, not analyzed	p > 0.05, not analyzed	417.131	357.174	320.355	288.359	271.866	288.387	-0.364739	0.151389	-2.40928	0.0159841	0.737137
WBGene00008456	eral-1	E02H1.2	p > 0.05, not analyzed	p > 0.05, not analyzed	615.417	639.384	727.347	742.648	832.3	868.17	0.30127	0.124985	2.41045	0.015933	0.737137
WBGene00022882	gtap-1	ZK1248.13	p > 0.05, not analyzed	p > 0.05, not analyzed	1262.19	1337.52	1460.62	1610.27	1514.34	1780.03	0.271982	0.112861	2.4099	0.015957	0.737137
WBGene00007474	C08H9.15	C08H9.15	p > 0.05, not analyzed	p > 0.05, not analyzed	32.9584	31.7419	52.7041	47.192	66.1072	91.8716	0.802328	0.333469	2.406	0.0161282	0.741233
WBGene00001936	his-62	F55G1.3	p > 0.05, not analyzed	p > 0.05, not analyzed	3532.47	4178.9	4037.84	4126.82	4742.37	5524.61	0.292876	0.121999	2.40064	0.0163666	0.744543
WBGene00006587	tnt-2	F53A9.10	p > 0.05, not analyzed	p > 0.05, not analyzed	506.29	458.026	417.714	273.251	329.787	435.591	-0.407468	0.169627	-2.40214	0.0162994	0.744543
WBGene00011528	fndc-1	T06D8.7	p > 0.05, not analyzed	p > 0.05, not analyzed	297.691	329.5	497.213	417.235	504.836	626.132	0.459509	0.191339	2.40154	0.016326	0.744543
WBGene00015507	C06A6.2	C06A6.2	p > 0.05, not analyzed	p > 0.05, not analyzed	204.111	199.984	210.827	283.201	270.453	247.025	0.378673	0.157995	2.39674	0.0165416	0.74996
WBGene00017065	D2092.4	D2092.4	p > 0.05, not analyzed	p > 0.05, not analyzed	163.413	113.895	118.75	88.9428	86.1977	97.4095	-0.533397	0.222979	-2.39215	0.0167502	0.756862
WBGene00020740	T23F4.2	T23F4.2	p > 0.05, not analyzed	p > 0.05, not analyzed	25.1665	17.2435	19.4132	5.47951	4.49227	13.3585	-1.40219	0.586716	-2.3899	0.0168531	0.758957
WBGene00004096	pqm-1	F40F8.7	p > 0.05, not analyzed	p > 0.05, not analyzed	182.83	159.713	140.272	112.542	123.416	111.353	-0.470729	0.197686	-2.3812	0.0172564	0.764863
WBGene00007811	C29F7.2	C29F7.2	p > 0.05, not analyzed	p > 0.05, not analyzed	233.536	255.162	231.752	173.34	211.342	154.338	-0.418787	0.175856	-2.38142	0.0172459	0.764863
WBGene00010963	nduo-4	MTCE.25	p > 0.05, not analyzed	p > 0.05, not analyzed	2502.94	2427.8	3697.94	2939.61	3850.75	4601.97	0.400723	0.168098	2.38387	0.0171319	0.764863
WBGene00016912	clec-86	C54D1.2	p > 0.05, not analyzed	p > 0.05, not analyzed	10.9846	11.6327	8.46721	2.14512	3.57529	1.71803	-2.05619	0.863609	-2.38092	0.0172693	0.764863
WBGene00020191	clec-53	T03F1.10	p > 0.05, not analyzed	p > 0.05, not analyzed	18.3922	15.065	16.1898	4.28778	4.38925	8.45726	-1.51724	0.636286	-2.38453	0.0171009	0.764863
WBGene00011915	ctf-8	T22C1.4	p > 0.05, not analyzed	p > 0.05, not analyzed	208.46	236.302	244.054	268.254	281.506	357.792	0.397545	0.167131	2.37864	0.0173768	0.767093
WBGene00015463	hpo-9	C05C8.6	p > 0.05, not analyzed	p > 0.05, not analyzed	1675.99	1818.16	1726.52	1969.34	2060.51	2123.77	0.237345	0.0998955	2.37593	0.0175046	0.767795
WBGene00045175	C10C6.9	C10C6.9	p > 0.05, not analyzed	p > 0.05, not analyzed	117.424	152.145	181.616	178.125	207.114	246.203	0.480955	0.202432	2.37588	0.0175071	0.767795
WBGene00001843	hgo-1	W06D4.1	p > 0.05, not analyzed	p > 0.05, not analyzed	496.461	421.131	482.868	416.842	353.274	338.228	-0.339655	0.143037	-2.3746	0.0175682	0.767964
WBGene00020443	esyt-2	T12A2.15	p > 0.05, not analyzed	p > 0.05, not analyzed	380.304	338.362	321.846	438.93	441.339	421.435	0.32505	0.137063	2.37154	0.0177142	0.769333
WBGene00023067	rpl-41.1	F54D7.6	p > 0.05, not analyzed	p > 0.05, not analyzed	585.583	605.043	729.78	688.707	759.916	1041.07	0.374303	0.157778	2.37235	0.0176755	0.769333
WBGene00043702	Y54G2A.7	Y54G2A.7	p > 0.05, not analyzed	p > 0.05, not analyzed	29.3532	19.1834	29.3241	5.36156	14.1864	13.6486	-1.20891	0.510081	-2.37004	0.017786	0.76996
WBGene00008147	C47E12.2	C47E12.2	p > 0.05, not analyzed	p > 0.05, not analyzed	686.131	766.742	849.228	828.679	986.828	1038.29	0.309644	0.131003	2.36364	0.0180965	0.770856
WBGene00009505	F37B12.3	F37B12.3	p > 0.05, not analyzed	p > 0.05, not analyzed	699.115	793.994	884.494	865.02	995.164	1094.92	0.313263	0.132474	2.36471	0.0180444	0.770856
WBGene00010132	F55H2.7	F55H2.7	p > 0.05, not analyzed	p > 0.05, not analyzed	522.076	616.697	743.677	706.209	824.358	858.837	0.342689	0.145053	2.36252	0.0181513	0.770856
WBGene00010699	trpp-6	K08H10.9	p > 0.05, not analyzed	p > 0.05, not analyzed	257.831	315.473	400.143	342.099	432.41	558.708	0.452552	0.191188	2.36704	0.0179308	0.770856
WBGene00016786	cyp-35A4	C49G7.8	p > 0.05, not analyzed	p > 0.05, not analyzed	18.4345	10.8575	7.66635	24.6458	28.7046	27.688	1.15846	0.489559	2.36633	0.0179653	0.770856
WBGene00021343	cutl-23	Y37B11A.1	p > 0.05, not analyzed	p > 0.05, not analyzed	17.884	14.0487	22.359	33.2189	45.2939	29.9546	0.984792	0.416236	2.36595	0.017984	0.770856
WBGene00000142	aos-1	C08B6.9	p > 0.05, not analyzed	p > 0.05, not analyzed	1327.33	1317.84	1510.44	1614	1594.87	1759	0.257107	0.109131	2.35594	0.018476	0.780973
WBGene00002256	lbp-4	ZK742.5	p > 0.05, not analyzed	p > 0.05, not analyzed	367.321	358.307	494.676	416.16	507.079	752.856	0.457954	0.194433	2.35534	0.0185059	0.780973
WBGene00017691	ilys-5	F22A3.6	p > 0.05, not analyzed	p > 0.05, not analyzed	5593.5	6091.64	5138.45	6593.47	6773	6421.57	0.234264	0.0995126	2.35411	0.018567	0.781095
WBGene00008694	vwa-8	F11C1.5	p > 0.05, not analyzed	p > 0.05, not analyzed	1890.87	1753.33	1808.9	1646.51	1453.99	1503.11	-0.245077	0.104213	-2.35169	0.0186884	0.783746
WBGene00000221	atf-4	T04C10.4	p > 0.05, not analyzed	p > 0.05, not analyzed	176.834	183.203	176.369	125.55	124.052	147.117	-0.433289	0.184445	-2.34915	0.0188162	0.784411
WBGene00019361	clik-3	K03E5.2	p > 0.05, not analyzed	p > 0.05, not analyzed	182.362	82.749	98.7139	43.2829	58.7521	110.168	-0.771049	0.328238	-2.34905	0.0188212	0.784411
WBGene00014020	ZK632.14	ZK632.14	p > 0.05, not analyzed	p > 0.05, not analyzed	240.011	293.371	289.45	289.478	343.251	475.728	0.430849	0.183663	2.34586	0.0189831	0.788708
WBGene00005018	sqt-3	F23H12.4	p > 0.05, not analyzed	p > 0.05, not analyzed	532.816	588.274	691.359	440.584	541.231	456.007	-0.335317	0.143179	-2.34194	0.019184	0.789721
WBGene00011860	pigc-1	T20D3.8	p > 0.05, not analyzed	p > 0.05, not analyzed	379.919	378.063	463.179	547.802	479.36	507.444	0.326433	0.139265	2.34397	0.0190797	0.789721
WBGene00022198	Y71H2B.11	Y71H2B.11	p > 0.05, not analyzed	p > 0.05, not analyzed	140.076	165.676	182.229	188.738	210.536	266.04	0.446307	0.190515	2.34263	0.0191482	0.789721
WBGene00012407	Y7A5A.1	Y7A5A.1	p > 0.05, not analyzed	p > 0.05, not analyzed	535.994	575.056	517.912	457.531	439.597	430.8	-0.29516	0.126185	-2.33911	0.0193298	0.793289
WBGene00001215	ego-2	Y53H1C.2	p > 0.05, not analyzed	p > 0.05, not analyzed	697.379	842.135	717.672	690.937	549.09	576.389	-0.315782	0.135139	-2.33672	0.0194537	0.795941
WBGene00003511	mxl-3	F46G10.6	p > 0.05, not analyzed	p > 0.05, not analyzed	544.571	454.624	545.175	381.595	435.778	419.053	-0.319503	0.136842	-2.33483	0.0195523	0.796011
WBGene00020273	urb-1	T05H4.10	p > 0.05, not analyzed	p > 0.05, not analyzed	469.423	487.327	575.79	596.866	638.696	659.687	0.305175	0.130729	2.33441	0.019574	0.796011
WBGene00001899	his-25	ZK131.2	p > 0.05, not analyzed	p > 0.05, not analyzed	607.796	217.015	738.701	175.979	206.089	277.837	-1.24409	0.533724	-2.33097	0.019755	0.796131
WBGene00010678	K08F4.3	K08F4.3	p > 0.05, not analyzed	p > 0.05, not analyzed	735.856	877.541	974.305	949.933	1102.67	1156.7	0.309788	0.132882	2.3313	0.0197375	0.796131
WBGene00021153	Y4C6A.3	Y4C6A.3	p > 0.05, not analyzed	p > 0.05, not analyzed	577.52	581.588	529.699	679.386	685.883	679.162	0.27666	0.118586	2.33299	0.0196486	0.796131
WBGene00011668	clec-47	T09F5.9	p > 0.05, not analyzed	p > 0.05, not analyzed	515.087	405.852	582.663	568.573	618.544	745.281	0.362323	0.15579	2.32571	0.0200342	0.802563
WBGene00021149	dnc-3	W10G11.20	p > 0.05, not analyzed	p > 0.05, not analyzed	308.521	301.154	430.189	394.681	425.767	563	0.410676	0.176554	2.32606	0.0200153	0.802563
WBGene00017142	EEED8.14	EEED8.14	p > 0.05, not analyzed	p > 0.05, not analyzed	444.392	509.164	575.147	570.172	637.817	711.726	0.327683	0.14097	2.3245	0.0200989	0.802761
WBGene00003929	pat-2	F54F2.1	p > 0.05, not analyzed	p > 0.05, not analyzed	428.516	357.801	350.695	248.515	348.658	273.326	-0.38118	0.164146	-2.3222	0.0202219	0.802894
WBGene00008439	mfb-1	DY3.6	p > 0.05, not analyzed	p > 0.05, not analyzed	109.411	85.8768	94.9496	64.2901	71.24	60.3463	-0.564716	0.243069	-2.32328	0.0201643	0.802894
WBGene00000991	dhs-28	M03A8.1	p > 0.05, not analyzed	p > 0.05, not analyzed	914.028	914.013	815.675	799.429	711.67	661.972	-0.283507	0.122535	-2.31368	0.020685	0.809551
WBGene00003082	lsm-8	Y73B6BL.32	p > 0.05, not analyzed	p > 0.05, not analyzed	465.902	553.757	539.036	543.823	652.478	783.539	0.345581	0.149325	2.31429	0.0206521	0.809551
WBGene00004721	san-1	ZC328.4	p > 0.05, not analyzed	p > 0.05, not analyzed	827.868	832.055	953.027	1021.29	967.656	1209.68	0.291367	0.125938	2.31357	0.0206912	0.809551
WBGene00007766	C27C7.1	C27C7.1	p > 0.05, not analyzed	p > 0.05, not analyzed	262.612	290.39	191.847	221.865	153.121	166.135	-0.462765	0.199869	-2.31534	0.0205942	0.809551
WBGene00008841	phat-8	F15A4.6	p > 0.05, not analyzed	p > 0.05, not analyzed	114.485	122.778	111.346	63.2933	107.227	61.4205	-0.584645	0.252525	-2.31519	0.0206023	0.809551
WBGene00008572	F08B12.4	F08B12.4	p > 0.05, not analyzed	p > 0.05, not analyzed	450.859	312.307	392.284	302.819	329.255	246.372	-0.393878	0.170617	-2.30856	0.0209682	0.815634
WBGene00020218	T04G9.7	T04G9.7	p > 0.05, not analyzed	p > 0.05, not analyzed	847.503	906.385	1127.26	1042.92	1175.41	1399	0.327695	0.141931	2.30883	0.0209529	0.815634
WBGene00020422	T10F2.2	T10F2.2	p > 0.05, not analyzed	p > 0.05, not analyzed	769.51	765.689	911.772	974.261	947.203	1043.66	0.276019	0.119861	2.30283	0.0212885	0.82332
WBGene00022734	ZK418.5	ZK418.5	p > 0.05, not analyzed	p > 0.05, not analyzed	581	714.672	743.114	865.101	832.422	804.359	0.292907	0.127147	2.30368	0.0212404	0.82332
WBGene00011856	nspg-7.1	T20D3.2	p > 0.05, not analyzed	p > 0.05, not analyzed	876.513	783.933	890.42	1040.02	1033.61	979.633	0.259013	0.112653	2.29921	0.0214933	0.826474
WBGene00012512	ekl-5	Y26E6A.1	p > 0.05, not analyzed	p > 0.05, not analyzed	483.288	483.269	407.975	573.221	553.557	561.756	0.298406	0.129758	2.29972	0.0214642	0.826474
WBGene00000780	cpn-4	F49D11.8	p > 0.05, not analyzed	p > 0.05, not analyzed	150.008	119.166	157.741	86.8838	112.953	103.343	-0.490731	0.213735	-2.29598	0.0216771	0.831161
WBGene00004023	pho-4	T16D1.2	p > 0.05, not analyzed	p > 0.05, not analyzed	99.5136	99.7596	59.3607	58.9389	54.8724	52.0796	-0.636357	0.277368	-2.29427	0.0217752	0.832544
PAL9A_CE_MuDR	Repetitive element		p > 0.05, not analyzed	p > 0.05, not analyzed	81.3602	61.549	100.508	54.6187	54.9843	48.1427	-0.631109	0.276494	-2.28254	0.0224574	0.835096
WBGene00004789	sgk-1	W10G6.2	p > 0.05, not analyzed	p > 0.05, not analyzed	182.86	170.082	159.088	145.783	124.577	104.774	-0.451151	0.197053	-2.2895	0.0220504	0.835096
WBGene00011040	arv-1	R05H5.5	p > 0.05, not analyzed	p > 0.05, not analyzed	296.49	330.414	343.059	392.376	369.865	466.425	0.340241	0.148564	2.2902	0.0220098	0.835096
WBGene00011124	sdz-27	R07H5.4	p > 0.05, not analyzed	p > 0.05, not analyzed	275.161	314.288	439.757	368.879	467.427	546.11	0.423925	0.185423	2.28625	0.0222394	0.835096
WBGene00016421	cdc-7	C34G6.5	p > 0.05, not analyzed	p > 0.05, not analyzed	908.004	859.157	964.41	1003.02	1093.5	1185.63	0.265365	0.116237	2.28296	0.0224329	0.835096
WBGene00016422	noah-1	C34G6.6	p > 0.05, not analyzed	p > 0.05, not analyzed	284.3	262.519	351.773	191.775	273.517	209.279	-0.413228	0.180606	-2.28801	0.0221369	0.835096
WBGene00016913	lam-2	C54D1.5	p > 0.05, not analyzed	p > 0.05, not analyzed	768.673	640.014	685.755	500.206	622.108	570.861	-0.304379	0.132863	-2.29092	0.0219679	0.835096
WBGene00020205	arrd-1	T04B8.3	p > 0.05, not analyzed	p > 0.05, not analyzed	65.2475	61.558	86.275	36.9952	44.9591	52.7766	-0.665918	0.291086	-2.2877	0.0221548	0.835096
WBGene00043156	C27F2.9	C27F2.9	p > 0.05, not analyzed	p > 0.05, not analyzed	411.879	496.654	618.595	559.576	650.272	768.597	0.372207	0.162861	2.28543	0.0222879	0.835096
WBGene00255714	B0511.19	B0511.19	p > 0.05, not analyzed	p > 0.05, not analyzed	378.87	387.962	492.859	453.628	527.242	641.313	0.364421	0.159664	2.28243	0.0224642	0.835096
WBGene00006760	unc-23	H14N18.1	p > 0.05, not analyzed	p > 0.05, not analyzed	227.941	163.659	213.459	142.24	138.442	166.428	-0.434171	0.190499	-2.27912	0.0226598	0.840039
WBGene00003495	mup-2	T22E5.5	p > 0.05, not analyzed	p > 0.05, not analyzed	919.079	906.951	946.26	629.026	787.856	840.472	-0.294696	0.129384	-2.27768	0.0227455	0.840896
WBGene00001208	egl-44	F28B12.2	p > 0.05, not analyzed	p > 0.05, not analyzed	91.8153	84.2286	62.8603	44.1082	58.0821	51.1541	-0.627032	0.276005	-2.27182	0.0230977	0.845863
WBGene00007507	C10C5.3	C10C5.3	p > 0.05, not analyzed	p > 0.05, not analyzed	462.997	337.826	489.712	310.787	335.828	355.774	-0.363725	0.160143	-2.27125	0.023132	0.845863
WBGene00021626	rft-2	Y47D7A.14	p > 0.05, not analyzed	p > 0.05, not analyzed	587.314	603.576	480.28	865.431	633.849	628.583	0.34631	0.152421	2.27207	0.0230825	0.845863
WBGene00196066	T19C4.17	T19C4.17	p > 0.05, not analyzed	p > 0.05, not analyzed	15.0351	16.347	14.2569	4.24253	3.01091	8.53186	-1.538	0.676408	-2.27378	0.0229795	0.845863
WBGene00000228	atn-1	W04D2.1	p > 0.05, not analyzed	p > 0.05, not analyzed	614.111	528.295	551.667	375.456	524.84	441.225	-0.33351	0.146972	-2.26921	0.0232553	0.848062
WBGene00010608	K07A1.1	K07A1.1	p > 0.05, not analyzed	p > 0.05, not analyzed	528.349	582.929	709.427	669.124	764.334	845.403	0.322799	0.142719	2.26179	0.0237107	0.850795
WBGene00011930	T22G5.3	T22G5.3	p > 0.05, not analyzed	p > 0.05, not analyzed	65.0786	61.6767	80.3057	85.7368	105.618	112.771	0.554199	0.244767	2.26419	0.0235622	0.850795
WBGene00016446	C35D10.10	C35D10.10	p > 0.05, not analyzed	p > 0.05, not analyzed	616.769	625.265	846.694	746.07	859.322	1076.51	0.360145	0.159179	2.26251	0.0236661	0.850795
WBGene00018811	pmt-2	F54D11.1	p > 0.05, not analyzed	p > 0.05, not analyzed	4508.07	3949.63	4343.56	3463.24	3478.68	3937.74	-0.234367	0.103613	-2.26194	0.023701	0.850795
WBGene00021869	vrp-1	Y54G2A.3	p > 0.05, not analyzed	p > 0.05, not analyzed	584.399	600.538	698.087	460.47	514.525	552.148	-0.302138	0.133294	-2.2667	0.0234088	0.850795
WBGene00022484	fbxa-77	Y119D3B.6	p > 0.05, not analyzed	p > 0.05, not analyzed	13.4779	11.8041	19.9606	28.9455	26.4106	36.456	1.01214	0.447321	2.26267	0.0236559	0.850795
WBGene00044745	Y62E10A.20	Y62E10A.20	p > 0.05, not analyzed	p > 0.05, not analyzed	69.8338	87.9644	118.785	144.729	118.889	137.388	0.525423	0.232479	2.26009	0.0238157	0.852284
WBGene00015650	pkg-2	C09G4.2	p > 0.05, not analyzed	p > 0.05, not analyzed	422.667	426.823	430.107	290.934	354.312	374.921	-0.325177	0.144029	-2.25773	0.0239627	0.855265
WBGene00016129	C26B2.7	C26B2.7	p > 0.05, not analyzed	p > 0.05, not analyzed	257.651	268.658	282.716	273.452	330.693	481.603	0.425912	0.188849	2.25531	0.0241142	0.858388
WBGene00018357	moc-3	F42G8.6	p > 0.05, not analyzed	p > 0.05, not analyzed	327.96	372.718	454.529	458.667	444.566	582.526	0.361226	0.160265	2.25394	0.0242002	0.859172
WBGene00001774	gst-26	Y53F4B.29	p > 0.05, not analyzed	p > 0.05, not analyzed	165.056	177.752	167.281	128.683	130.51	123.832	-0.413976	0.184193	-2.24751	0.0246075	0.87123
WBGene00019748	atg-2	M03A8.2	p > 0.05, not analyzed	p > 0.05, not analyzed	815.921	741.989	763.387	661.519	698.441	521.93	-0.303324	0.135019	-2.24654	0.0246697	0.87123
WBGene00002265	lec-2	F52H3.7	p > 0.05, not analyzed	p > 0.05, not analyzed	1180.37	1047.54	1271.77	855.722	1034.32	996.936	-0.276884	0.123309	-2.24546	0.0247389	0.87138
WBGene00010440	ttr-51	JC8.8	p > 0.05, not analyzed	p > 0.05, not analyzed	626.131	672.668	882.172	815.409	874.282	1068.46	0.337628	0.150659	2.24101	0.0250255	0.876872
WBGene00077457	Y39B6A.49	Y39B6A.49	p > 0.05, not analyzed	p > 0.05, not analyzed	59.0124	50.0177	55.6375	85.7191	85.117	75.4148	0.580452	0.258978	2.24132	0.0250056	0.876872
WBGene00018522	F46H5.7	F46H5.7	p > 0.05, not analyzed	p > 0.05, not analyzed	643.385	600.143	617.676	477.628	540.188	517.944	-0.275653	0.123088	-2.23948	0.0251248	0.878061
WBGene00008823	F14H3.4	F14H3.4	p > 0.05, not analyzed	p > 0.05, not analyzed	405.843	404.561	449.473	458.794	506.574	607.288	0.320731	0.143379	2.23695	0.0252894	0.881517
WBGene00000785	cpr-5	W07B8.5	p > 0.05, not analyzed	p > 0.05, not analyzed	4087.02	4133	3230.9	3546.38	2758.32	3106.29	-0.283065	0.127123	-2.2267	0.0259673	0.885273
WBGene00006817	unc-85	F10G7.3	p > 0.05, not analyzed	p > 0.05, not analyzed	759.101	905.511	809.823	997.958	920.308	1059.98	0.266902	0.120091	2.2225	0.0262494	0.885273
WBGene00006893	spon-1	F10E7.4	p > 0.05, not analyzed	p > 0.05, not analyzed	232.598	210.708	234.718	171.407	201.539	138.602	-0.407359	0.183437	-2.2207	0.0263713	0.885273
WBGene00006959	xbp-1	R74.3	p > 0.05, not analyzed	p > 0.05, not analyzed	1517.39	1549.98	1305.24	1305.21	1239.05	1102.63	-0.261891	0.117692	-2.22522	0.0260663	0.885273
WBGene00008486	ugt-44	F01D4.2	p > 0.05, not analyzed	p > 0.05, not analyzed	159.846	154.48	130.506	193.935	197.926	192.641	0.397557	0.179042	2.22047	0.0263867	0.885273
WBGene00008722	F12F6.7	F12F6.7	p > 0.05, not analyzed	p > 0.05, not analyzed	1115.82	1147.29	1217.73	1286.96	1373.03	1449.39	0.239503	0.107716	2.22346	0.0261846	0.885273
WBGene00012277	ccch-3	W05B10.2	p > 0.05, not analyzed	p > 0.05, not analyzed	400.245	440.075	522.395	487.507	552.161	700.768	0.352597	0.158638	2.22264	0.0262399	0.885273
WBGene00012588	lips-16	Y38E10A.10	p > 0.05, not analyzed	p > 0.05, not analyzed	12.2759	6.48585	10.509	20.3633	16.6016	30.3233	1.20954	0.542581	2.22924	0.0257983	0.885273
WBGene00013275	btb-14	Y57A10B.3	p > 0.05, not analyzed	p > 0.05, not analyzed	104.289	92.7707	128.787	70.7416	86.6875	68.3538	-0.531257	0.239095	-2.22195	0.0262869	0.885273
WBGene00014083	ZK795.3	ZK795.3	p > 0.05, not analyzed	p > 0.05, not analyzed	424.284	457.486	519.149	501.663	585.323	662.005	0.320065	0.143967	2.22318	0.0262035	0.885273
WBGene00016564	cmt-1	C41D11.5	p > 0.05, not analyzed	p > 0.05, not analyzed	760.687	801.865	876.694	855.531	1015.23	1098.92	0.284143	0.12754	2.22787	0.0258894	0.885273
WBGene00016898	clik-2	C53C9.2	p > 0.05, not analyzed	p > 0.05, not analyzed	191.827	122.963	127.649	100.717	125.841	77.0392	-0.539354	0.242134	-2.2275	0.0259136	0.885273
WBGene00017767	F25B4.4	F25B4.4	p > 0.05, not analyzed	p > 0.05, not analyzed	278.855	282.422	330.133	365.658	348.452	406.899	0.328946	0.148069	2.22158	0.0263119	0.885273
WBGene00020933	W02D3.4	W02D3.4	p > 0.05, not analyzed	p > 0.05, not analyzed	813.431	809.804	773.754	992.345	912.615	939.77	0.246945	0.110649	2.23179	0.0256286	0.885273
WBGene00138720	F58H1.8	F58H1.8	p > 0.05, not analyzed	p > 0.05, not analyzed	182.305	201.724	257.563	234.824	262.043	377.399	0.445524	0.199547	2.23267	0.0255704	0.885273
WBGene00003076	lsm-1	F40F8.9	p > 0.05, not analyzed	p > 0.05, not analyzed	488.434	576.326	626.133	594.306	693.565	843.16	0.333435	0.150629	2.21362	0.0268549	0.885404
WBGene00006928	vit-4	F59D8.2	p > 0.05, not analyzed	p > 0.05, not analyzed	34717.5	30011.2	22580.9	24340.6	22245.5	24422.5	-0.298085	0.134573	-2.21505	0.0267564	0.885404
WBGene00007429	C08B6.8	C08B6.8	p > 0.05, not analyzed	p > 0.05, not analyzed	379.345	412.651	537.251	470.168	599.807	634.595	0.357741	0.161506	2.21503	0.0267578	0.885404
WBGene00007650	ugt-23	C17G1.3	p > 0.05, not analyzed	p > 0.05, not analyzed	178.706	173.873	197.553	150.22	148.883	112	-0.425368	0.192095	-2.21437	0.0268036	0.885404
WBGene00010041	F54C9.3	F54C9.3	p > 0.05, not analyzed	p > 0.05, not analyzed	152.944	138.006	175.65	189.17	188.502	246.656	0.419187	0.18908	2.21698	0.0266246	0.885404
WBGene00011184	R09H10.7	R09H10.7	p > 0.05, not analyzed	p > 0.05, not analyzed	10.9609	24.1328	32.7459	43.9836	31.5415	54.5061	0.918448	0.414066	2.21812	0.0265464	0.885404
WBGene00017471	F14H12.3	F14H12.3	p > 0.05, not analyzed	p > 0.05, not analyzed	37.9999	18.2736	18.0809	9.64789	8.78824	14.3912	-1.16056	0.524501	-2.2127	0.0269184	0.885404
WBGene00018366	F42H10.2	F42H10.2	p > 0.05, not analyzed	p > 0.05, not analyzed	235.189	263.368	309.887	305.81	335.295	401.391	0.365172	0.164677	2.2175	0.0265887	0.885404
WBGene00009280	F31B9.3	F31B9.3	p > 0.05, not analyzed	p > 0.05, not analyzed	107.817	120.159	113.091	153.305	159.383	146.703	0.428456	0.193815	2.21065	0.0270602	0.887891
WBGene00009259	hpo-34	F29G6.3	p > 0.05, not analyzed	p > 0.05, not analyzed	2127.66	2101.55	1778.08	1827.44	1544.47	1660.71	-0.255404	0.115599	-2.20939	0.0271478	0.888594
WBGene00016260	rege-1	C30F12.1	p > 0.05, not analyzed	p > 0.05, not analyzed	166.067	159.111	136.429	104.995	113.517	121.259	-0.436698	0.197812	-2.20764	0.0272691	0.889287
WBGene00018867	zhp-1	F55A12.10	p > 0.05, not analyzed	p > 0.05, not analyzed	207.171	207.697	233.387	247.089	284.363	297.033	0.354238	0.160494	2.20718	0.0273015	0.889287
WBGene00013925	coa-7	ZK20.4	p > 0.05, not analyzed	p > 0.05, not analyzed	378.15	393.405	333.611	455.839	388.196	559.488	0.347761	0.157755	2.20443	0.0274938	0.893383
WBGene00009094	F23H12.5	F23H12.5	p > 0.05, not analyzed	p > 0.05, not analyzed	19.6912	39.3056	42.3281	20.3546	13.8387	18.3679	-0.962611	0.436941	-2.20307	0.02759	0.894342
WBGene00009488	oac-20	F36G9.12	p > 0.05, not analyzed	p > 0.05, not analyzed	46.7504	34.8904	23.0661	24.6413	17.3225	11.7028	-0.970076	0.441072	-2.19936	0.0278524	0.898509
WBGene00019205	kcc-2	H16O14.1	p > 0.05, not analyzed	p > 0.05, not analyzed	344.016	281.645	283.489	259.071	233.977	220.524	-0.349792	0.159028	-2.19957	0.0278375	0.898509
WBGene00019757	memb-2	M03E7.5	p > 0.05, not analyzed	p > 0.05, not analyzed	454.021	462.08	628.469	524.074	688.749	780.817	0.367757	0.167372	2.19724	0.0280032	0.901207
WBGene00008348	elmd-1	C56G7.3	p > 0.05, not analyzed	p > 0.05, not analyzed	50.8571	35.0117	65.8686	87.474	127.606	46.1241	0.756634	0.34473	2.19486	0.0281737	0.902565
WBGene00009207	F28C6.8	F28C6.8	p > 0.05, not analyzed	p > 0.05, not analyzed	387.498	391.402	511.973	513.671	504.673	604.192	0.328042	0.149465	2.19477	0.0281799	0.902565
WBGene00012766	Y41E3.8	Y41E3.8	p > 0.05, not analyzed	p > 0.05, not analyzed	155.508	141.521	135.789	90.3355	95.7648	127.086	-0.464164	0.211677	-2.1928	0.0283219	0.904953
WBGene00012445	Y16B4A.2	Y16B4A.2	p > 0.05, not analyzed	p > 0.05, not analyzed	1278.74	1094.01	929.939	1051.81	772.692	813.665	-0.32442	0.148053	-2.19124	0.0284347	0.906398
WBGene00004128	pqn-41	F53A3.4	p > 0.05, not analyzed	p > 0.05, not analyzed	618.708	700.484	620.107	539.602	557.894	510.323	-0.270962	0.123863	-2.18759	0.0286996	0.90898
WBGene00006588	tnt-3	C14F5.3	p > 0.05, not analyzed	p > 0.05, not analyzed	573.463	391.012	491.719	379.139	406.361	365.132	-0.337436	0.154436	-2.18495	0.0288927	0.90898
WBGene00006801	unc-68	K11C4.5	p > 0.05, not analyzed	p > 0.05, not analyzed	1594.81	1340.7	1257.19	1154.54	1292.74	971.499	-0.293785	0.134325	-2.18711	0.0287342	0.90898
WBGene00007309	C04G2.10	C04G2.10	p > 0.05, not analyzed	p > 0.05, not analyzed	19.2771	22.6319	24.9056	43.8815	29.2348	47.4849	0.845265	0.38639	2.18759	0.0286991	0.90898
WBGene00011431	T04D3.1	T04D3.1	p > 0.05, not analyzed	p > 0.05, not analyzed	260.506	259.355	300.791	336.477	364.663	327.378	0.32383	0.148172	2.1855	0.0288521	0.90898
WBGene00012018	T25C12.3	T25C12.3	p > 0.05, not analyzed	p > 0.05, not analyzed	4460.77	3771.89	3490.08	3597.8	3176.16	3027.63	-0.258157	0.118214	-2.18381	0.0289759	0.90898
WBGene00018845	F54H12.5	F54H12.5	p > 0.05, not analyzed	p > 0.05, not analyzed	104.367	111.431	125.224	127.534	169.369	168.341	0.448905	0.205578	2.18362	0.0289898	0.90898
WBGene00002120	ins-37	F08G2.6	p > 0.05, not analyzed	p > 0.05, not analyzed	6959.27	9758.19	12148.4	8054.64	7158.48	7684.69	-0.334413	0.153312	-2.18125	0.029165	0.910681
WBGene00011892	erh-1	T21C9.4	p > 0.05, not analyzed	p > 0.05, not analyzed	540.686	637.682	778.043	699.31	788.352	1006.76	0.349652	0.160314	2.18105	0.0291798	0.910681
WBGene00007808	best-7	C29F4.2	p > 0.05, not analyzed	p > 0.05, not analyzed	232.451	211.266	229.507	182.141	173.439	169.036	-0.360901	0.165911	-2.17526	0.0296104	0.912375
WBGene00010325	exos-3	F59C6.4	p > 0.05, not analyzed	p > 0.05, not analyzed	537.409	601.024	714.021	604.712	767.734	1034.1	0.377706	0.173573	2.17606	0.0295506	0.912375
WBGene00013433	Y66D12A.7	Y66D12A.7	p > 0.05, not analyzed	p > 0.05, not analyzed	122.048	155.441	140.171	174.828	174.312	206.179	0.409869	0.18819	2.17796	0.0294093	0.912375
WBGene00019599	acds-10	K09H11.1	p > 0.05, not analyzed	p > 0.05, not analyzed	294.19	279.709	276.233	235.676	240.27	192.74	-0.34741	0.15974	-2.17484	0.029642	0.912375
WBGene00020026	R12C12.6	R12C12.6	p > 0.05, not analyzed	p > 0.05, not analyzed	313.979	350.156	494.267	438.31	531.677	525.831	0.368549	0.169436	2.17514	0.0296193	0.912375
WBGene00020716	phf-30	T23B12.1	p > 0.05, not analyzed	p > 0.05, not analyzed	366.239	413.721	523.289	459.931	573.82	633.147	0.353993	0.162507	2.17832	0.0293823	0.912375
WBGene00001882	his-8	F45F2.12	p > 0.05, not analyzed	p > 0.05, not analyzed	263.005	258.384	300.048	300.444	338.608	406.025	0.34776	0.160099	2.17215	0.0298442	0.914933
WBGene00008459	mrpl-53	E02H1.8	p > 0.05, not analyzed	p > 0.05, not analyzed	190.92	192.045	275.892	239.253	309.918	326.042	0.407671	0.187852	2.17017	0.0299941	0.914933
WBGene00011951	T23F6.3	T23F6.3	p > 0.05, not analyzed	p > 0.05, not analyzed	1.69903	11.2628	88.7299	1.11285	0.60545	7.04891	-3.50546	1.61533	-2.17012	0.0299978	0.914933
WBGene00019660	K11H12.4	K11H12.4	p > 0.05, not analyzed	p > 0.05, not analyzed	38.071	34.6474	32.519	20.362	16.574	21.0275	-0.859121	0.39558	-2.1718	0.0298705	0.914933
WBGene00006568	thk-1	Y43C5A.5	p > 0.05, not analyzed	p > 0.05, not analyzed	672.061	667.129	743.309	752.951	819.643	947.649	0.275641	0.127227	2.16654	0.0302703	0.921151
WBGene00000510	cka-2	C52B9.1	p > 0.05, not analyzed	p > 0.05, not analyzed	42.4125	31.5079	24.1784	17.4927	22.7043	9.50992	-0.976792	0.452299	-2.15962	0.0308025	0.931249
WBGene00003099	lys-10	F17E9.11	p > 0.05, not analyzed	p > 0.05, not analyzed	29.3455	17.0352	23.6323	18.2299	6.21283	6.83029	-1.18747	0.550324	-2.15776	0.0309466	0.931249
WBGene00013202	gid-1	Y54E5A.7	p > 0.05, not analyzed	p > 0.05, not analyzed	447.952	314.724	331.854	299.485	257.425	294.102	-0.356158	0.16484	-2.16063	0.0307241	0.931249
WBGene00013327	Y57G11C.38	Y57G11C.38	p > 0.05, not analyzed	p > 0.05, not analyzed	3.28714	0.724398	7.0394	71.8732	9.92582	5.62963	2.80873	1.30099	2.15891	0.0308569	0.931249
WBGene00017780	F25E2.2	F25E2.2	p > 0.05, not analyzed	p > 0.05, not analyzed	527.85	407.642	461.881	305.438	382.961	415.814	-0.337045	0.156204	-2.15773	0.0309491	0.931249
WBGene00007118	npp-22	B0240.4	p > 0.05, not analyzed	p > 0.05, not analyzed	1799.25	1894.49	1740.75	2211.43	2020.1	2083.2	0.21639	0.100669	2.14951	0.0315936	0.941449
WBGene00008768	F13G3.10	F13G3.10	p > 0.05, not analyzed	p > 0.05, not analyzed	345.371	460.425	496.164	497.152	472.318	737.061	0.388464	0.180748	2.1492	0.0316185	0.941449
WBGene00013883	npr-13	ZC412.1	p > 0.05, not analyzed	p > 0.05, not analyzed	1.32294	36.5345	3.09507	0	2.34008	0.451456	-2.60845	1.21433	-2.14806	0.031709	0.941449
WBGene00015778	got-2.2	C14F11.1	p > 0.05, not analyzed	p > 0.05, not analyzed	1193.06	1210.64	1047.74	1370.57	1305.05	1386.31	0.235691	0.109619	2.15008	0.0315486	0.941449
WBGene00020256	T05C3.6	T05C3.6	p > 0.05, not analyzed	p > 0.05, not analyzed	83.1125	72.1082	72.0599	51.2646	54.3368	46.6816	-0.573858	0.266777	-2.15108	0.0314702	0.941449
WBGene00020846	T27A10.6	T27A10.6	p > 0.05, not analyzed	p > 0.05, not analyzed	29.5382	20.7485	25.9775	13.9267	11.2418	12.5215	-1.01909	0.474319	-2.14854	0.0316705	0.941449
WBGene00019327	zip-2	K02F3.4	p > 0.05, not analyzed	p > 0.05, not analyzed	410.38	371.174	376.324	330.392	292.028	317.138	-0.301432	0.140395	-2.14702	0.0317915	0.941814
WBGene00022516	mtx-2	ZC97.1	p > 0.05, not analyzed	p > 0.05, not analyzed	507.34	520.437	679.113	607.834	695.482	848.679	0.333777	0.155582	2.14535	0.0319246	0.943676
WBGene00003877	pept-1	K04E7.2	p > 0.05, not analyzed	p > 0.05, not analyzed	742.144	775.332	605.175	654.554	532.693	536.76	-0.300657	0.140344	-2.14228	0.032171	0.945325
WBGene00008692	scav-4	F11C1.3	p > 0.05, not analyzed	p > 0.05, not analyzed	98.3758	93.5936	63.3502	56.7867	56.4047	57.7732	-0.572116	0.267193	-2.14121	0.0322572	0.945325
WBGene00011252	R11H6.4	R11H6.4	p > 0.05, not analyzed	p > 0.05, not analyzed	16.2604	22.4572	35.4113	54.4798	46.6129	33.483	0.83311	0.389176	2.1407	0.0322981	0.945325
WBGene00012118	grsp-2	T28C6.1	p > 0.05, not analyzed	p > 0.05, not analyzed	33.9179	39.574	21.5911	10.9832	16.1882	21.0568	-0.961569	0.449457	-2.1394	0.0324031	0.945325
WBGene00013567	Y75B12B.1	Y75B12B.1	p > 0.05, not analyzed	p > 0.05, not analyzed	2056.59	2170.59	2140.89	2440.82	2372.07	2534.91	0.206285	0.0964166	2.13951	0.032394	0.945325
WBGene00016387	kbp-5	C34B2.2	p > 0.05, not analyzed	p > 0.05, not analyzed	579.03	567.458	741.834	632.879	822.584	927.198	0.335457	0.156582	2.14238	0.0321631	0.945325
WBGene00016567	C41D11.9	C41D11.9	p > 0.05, not analyzed	p > 0.05, not analyzed	187.182	195.251	270.752	270.212	248.856	346.841	0.403713	0.188925	2.13689	0.0326066	0.949199
CELE1_DNA_transposon	Repetitive element		p > 0.05, not analyzed	p > 0.05, not analyzed	379.681	447.33	435.856	379.118	331.624	313.757	-0.305516	0.14406	-2.12076	0.0339419	0.952169
WBGene00000798	crn-5	C14A4.5	p > 0.05, not analyzed	p > 0.05, not analyzed	204.353	229.578	270.905	240.182	295.546	401.092	0.410714	0.193147	2.12643	0.0334671	0.952169
WBGene00001795	gtl-1	C05C12.3	p > 0.05, not analyzed	p > 0.05, not analyzed	581.37	548.815	505.243	478.794	456.873	412.076	-0.279175	0.131496	-2.12307	0.033748	0.952169
WBGene00003597	nhl-1	F54G8.4	p > 0.05, not analyzed	p > 0.05, not analyzed	77.5022	73.7846	50.5657	42.1394	47.3192	40.5445	-0.627408	0.295906	-2.1203	0.0339811	0.952169
WBGene00004383	rnh-2	T13H5.7	p > 0.05, not analyzed	p > 0.05, not analyzed	650.388	662.798	804.592	792.07	816.384	969.858	0.283219	0.133687	2.11851	0.0341315	0.952169
WBGene00006376	syp-2	C24G6.1	p > 0.05, not analyzed	p > 0.05, not analyzed	654.034	768.424	849.325	830.662	941.715	986.067	0.279161	0.130956	2.13171	0.0330305	0.952169
WBGene00007099	trx-2	B0024.9	p > 0.05, not analyzed	p > 0.05, not analyzed	256.301	284.007	378.034	338.14	402.908	441.229	0.362168	0.17104	2.11745	0.0342215	0.952169
WBGene00007372	C06B8.7	C06B8.7	p > 0.05, not analyzed	p > 0.05, not analyzed	221.792	182.119	186.286	158.515	155.787	137.176	-0.385858	0.181113	-2.13048	0.0331318	0.952169
WBGene00007508	C10C5.4	C10C5.4	p > 0.05, not analyzed	p > 0.05, not analyzed	266.59	260.212	341.774	201.465	227.356	248.664	-0.358764	0.169541	-2.11609	0.0343374	0.952169
WBGene00007841	C31C9.7	C31C9.7	p > 0.05, not analyzed	p > 0.05, not analyzed	18.204	11.4011	23.185	7.51083	7.30235	7.00216	-1.28004	0.600069	-2.13316	0.0329116	0.952169
WBGene00008042	C40H1.7	C40H1.7	p > 0.05, not analyzed	p > 0.05, not analyzed	103.042	68.05	76.3223	32.4597	86.942	34.3951	-0.732258	0.345891	-2.11702	0.0342582	0.952169
WBGene00010194	btb-19	F57C2.2	p > 0.05, not analyzed	p > 0.05, not analyzed	289.446	379.158	389.78	394.46	435.842	505.293	0.334326	0.157405	2.12399	0.0336712	0.952169
WBGene00010892	dhhc-6	M18.8	p > 0.05, not analyzed	p > 0.05, not analyzed	898.168	967.607	992.163	1138.04	1136.2	1079.86	0.229924	0.108418	2.12071	0.0339461	0.952169
WBGene00011033	tmem-208	R05D11.5	p > 0.05, not analyzed	p > 0.05, not analyzed	315.148	323.533	421.448	372.142	424.11	585.088	0.381542	0.179185	2.12932	0.0332277	0.952169
WBGene00011206	R10E4.11	R10E4.11	p > 0.05, not analyzed	p > 0.05, not analyzed	442.06	476.791	473.489	584.966	569.882	522.559	0.267717	0.126296	2.11976	0.0340261	0.952169
WBGene00013307	melo-1	Y57G11C.9	p > 0.05, not analyzed	p > 0.05, not analyzed	1604.47	1944.86	1266.71	1972.25	1823.34	2135.77	0.301858	0.142081	2.12454	0.0336247	0.952169
WBGene00015791	bbln-1	C15C7.5	p > 0.05, not analyzed	p > 0.05, not analyzed	102.173	101.747	105.353	52.8824	79.1573	82.4084	-0.5206	0.244462	-2.12957	0.0332068	0.952169
WBGene00016627	C44B7.5	C44B7.5	p > 0.05, not analyzed	p > 0.05, not analyzed	1975.69	2028.28	2554.15	2305.21	2676.64	2949.8	0.274125	0.129545	2.11605	0.0343405	0.952169
WBGene00016676	C45G9.5	C45G9.5	p > 0.05, not analyzed	p > 0.05, not analyzed	709.664	689.032	869.775	775.929	934.303	1107.84	0.313196	0.147195	2.12777	0.0333565	0.952169
WBGene00016677	C45G9.6	C45G9.6	p > 0.05, not analyzed	p > 0.05, not analyzed	82.0815	61.6744	85.0297	57.1558	46.7348	49.1076	-0.585909	0.274601	-2.13367	0.0328699	0.952169
WBGene00017644	exc-9	F20D12.5	p > 0.05, not analyzed	p > 0.05, not analyzed	24.3273	29.2504	24.2496	43.9873	45.2668	41.6981	0.749832	0.352116	2.12951	0.0332124	0.952169
WBGene00019744	M02H5.8	M02H5.8	p > 0.05, not analyzed	p > 0.05, not analyzed	63.6172	37.0938	82.405	24.2915	22.4463	59.9154	-0.838365	0.395853	-2.11787	0.0341858	0.952169
WBGene00044107	chca-1	F58G6.9	p > 0.05, not analyzed	p > 0.05, not analyzed	197.665	207.03	240.744	260.686	268.033	290.164	0.34145	0.160558	2.12665	0.0334492	0.952169
WBGene00005025	sqv-7	C52E12.3	p > 0.05, not analyzed	p > 0.05, not analyzed	808.221	867.817	791.601	1087.62	962.981	892.541	0.253183	0.11992	2.11127	0.0347491	0.955601
WBGene00014253	ZK1320.3	ZK1320.3	p > 0.05, not analyzed	p > 0.05, not analyzed	542.686	580.498	699.759	738.88	842.643	660.822	0.29674	0.140547	2.11133	0.0347441	0.955601
WBGene00019148	H03E18.1	H03E18.1	p > 0.05, not analyzed	p > 0.05, not analyzed	72.6449	73.2877	78.9853	47.1328	53.5243	51.6797	-0.560924	0.265545	-2.11235	0.0346561	0.955601
WBGene00021068	W06H8.6	W06H8.6	p > 0.05, not analyzed	p > 0.05, not analyzed	232.717	210.043	179.177	157.466	161.417	159.19	-0.375654	0.177787	-2.11295	0.0346052	0.955601
WBGene00020866	vps-24	T27F7.1	p > 0.05, not analyzed	p > 0.05, not analyzed	883.09	978.287	1148.28	1052.85	1233.69	1386.62	0.287085	0.136112	2.10919	0.0349285	0.95857
WBGene00000022	abt-4	Y39D8C.1	p > 0.05, not analyzed	p > 0.05, not analyzed	264.83	209.263	188.041	166.023	163.757	176.459	-0.382441	0.181881	-2.10269	0.0354927	0.960221
WBGene00000039	acn-1	C42D8.5	p > 0.05, not analyzed	p > 0.05, not analyzed	81.2426	110.364	117.43	56.7764	92.4699	61.7388	-0.550467	0.262253	-2.09899	0.0358175	0.960221
WBGene00001932	his-58	F54E12.4	p > 0.05, not analyzed	p > 0.05, not analyzed	5998.45	7342.58	6423.59	6781.46	7675.43	9295.73	0.265218	0.126439	2.0976	0.0359404	0.960221
WBGene00001940	his-66	H02I12.6	p > 0.05, not analyzed	p > 0.05, not analyzed	5998.45	7342.58	6423.59	6781.46	7675.43	9295.73	0.265218	0.126439	2.0976	0.0359404	0.960221
WBGene00003369	mlc-1	C36E6.3	p > 0.05, not analyzed	p > 0.05, not analyzed	1477.84	1198.26	1396.3	839.198	1191.49	1251.34	-0.30968	0.147696	-2.09674	0.0360165	0.960221
WBGene00004031	pis-1	T13F2.3	p > 0.05, not analyzed	p > 0.05, not analyzed	329.94	423.114	322.576	294.587	239.25	311.878	-0.347275	0.165395	-2.09967	0.0357579	0.960221
WBGene00011026	R05D7.1	R05D7.1	p > 0.05, not analyzed	p > 0.05, not analyzed	13.3898	10.4735	9.34374	5.36406	2.70871	2.59994	-1.65527	0.788071	-2.10041	0.0356928	0.960221
WBGene00014003	ZK593.3	ZK593.3	p > 0.05, not analyzed	p > 0.05, not analyzed	136.849	172.063	212.123	215.749	243.304	227.734	0.392884	0.186863	2.10253	0.0355069	0.960221
WBGene00017269	eco-1	F08F8.4	p > 0.05, not analyzed	p > 0.05, not analyzed	860.4	915.016	1033.25	1020.33	1098.15	1244.79	0.25967	0.123617	2.10061	0.0356756	0.960221
WBGene00018408	F44B9.5	F44B9.5	p > 0.05, not analyzed	p > 0.05, not analyzed	471.616	449.433	576.823	526.191	654.088	674.431	0.308242	0.146317	2.10668	0.0351457	0.960221
WBGene00018958	cest-27	F56C11.6	p > 0.05, not analyzed	p > 0.05, not analyzed	45.569	69.3558	52.0107	34.6837	36.3132	33.9838	-0.669745	0.318743	-2.10121	0.0356225	0.960221
WBGene00021005	ule-1	W03F11.1	p > 0.05, not analyzed	p > 0.05, not analyzed	860.721	935.312	1031.71	1019.34	1039.4	1419.11	0.298444	0.142175	2.09913	0.0358053	0.960221
WBGene00021286	tald-1	Y24D9A.8	p > 0.05, not analyzed	p > 0.05, not analyzed	1812.52	1787.58	1714.19	1597.16	1470.51	1524.54	-0.210839	0.10058	-2.09623	0.036062	0.960221
WBGene00022496	fbxa-92	Y119D3B.20	p > 0.05, not analyzed	p > 0.05, not analyzed	13.4584	14.941	14.2028	26.8065	27.4465	28.1158	0.950323	0.450926	2.10749	0.035075	0.960221
WBGene00302968	Y62E10A.24	Y62E10A.24	p > 0.05, not analyzed	p > 0.05, not analyzed	228.653	304.837	397.271	292.362	432.698	551.609	0.454861	0.216139	2.10448	0.0353364	0.960221
WBGene00011289	R102.2	R102.2	p > 0.05, not analyzed	p > 0.05, not analyzed	42.5511	28.1539	64.2698	19.312	34.4686	21.7556	-0.838132	0.400254	-2.094	0.0362599	0.963579
WBGene00008669	acs-14	F11A3.1	p > 0.05, not analyzed	p > 0.05, not analyzed	440.081	449.946	356.73	390.03	305.005	296.756	-0.331491	0.158491	-2.09154	0.0364793	0.963686
WBGene00011773	ttr-53	T14G10.3	p > 0.05, not analyzed	p > 0.05, not analyzed	329.01	343.207	444.626	369.946	460.117	632.891	0.389544	0.186212	2.09194	0.0364438	0.963686
WBGene00016274	C30G12.2	C30G12.2	p > 0.05, not analyzed	p > 0.05, not analyzed	338.054	268.985	307.673	234.791	215.987	270.779	-0.340032	0.162454	-2.0931	0.0363399	0.963686
WBGene00009431	dct-17	F35E12.7	p > 0.05, not analyzed	p > 0.05, not analyzed	3.86355	12.1788	9.03993	17.8195	23.2437	17.7968	1.21178	0.579653	2.09052	0.0365714	0.964221
WBGene00007045	pgap-2	T04A8.12	p > 0.05, not analyzed	p > 0.05, not analyzed	338.428	340.084	421.926	423.416	445.01	489.618	0.301993	0.145058	2.08188	0.0373533	0.97025
WBGene00011971	lron-9	T23G11.6	p > 0.05, not analyzed	p > 0.05, not analyzed	84.3438	113.317	88.1039	56.1583	86.9809	51.5584	-0.561207	0.269603	-2.08161	0.0373785	0.97025
WBGene00013679	Y105E8A.21	Y105E8A.21	p > 0.05, not analyzed	p > 0.05, not analyzed	1088.49	1176.43	1068.94	1285.18	1225.8	1396.06	0.229035	0.109971	2.08269	0.0372797	0.97025
WBGene00017134	EEED8.3	EEED8.3	p > 0.05, not analyzed	p > 0.05, not analyzed	1703.45	1884.71	2489.73	2047.57	2481.56	3115.33	0.330634	0.158602	2.08467	0.0370991	0.97025
WBGene00017548	F18A1.7	F18A1.7	p > 0.05, not analyzed	p > 0.05, not analyzed	3153.53	3359.36	3059.22	3583.73	3555.16	3877.41	0.202928	0.0974033	2.08338	0.0372166	0.97025
WBGene00018460	F45D11.15	F45D11.15	p > 0.05, not analyzed	p > 0.05, not analyzed	7.37303	8.6824	12.4542	4.2863	0	3.35735	-1.93771	0.928749	-2.08636	0.036946	0.97025
WBGene00018461	F45D11.16	F45D11.16	p > 0.05, not analyzed	p > 0.05, not analyzed	7.37303	8.6824	12.4542	4.2863	0	3.35735	-1.93771	0.928749	-2.08636	0.036946	0.97025
WBGene00019612	gpcp-1	K10B3.6	p > 0.05, not analyzed	p > 0.05, not analyzed	103.848	84.201	92.9807	70.8224	75.411	47.1951	-0.541641	0.259797	-2.08486	0.0370817	0.97025
WBGene00009288	F31C3.6	F31C3.6	p > 0.05, not analyzed	p > 0.05, not analyzed	72.1471	46.3531	56.6282	36.2624	36.0461	38.8299	-0.648406	0.311833	-2.07934	0.0375863	0.973761
WBGene00008440	DY3.8	DY3.8	p > 0.05, not analyzed	p > 0.05, not analyzed	855.39	963.345	1021.24	1007.9	1119.13	1280.55	0.262745	0.126427	2.07823	0.0376885	0.974526
WBGene00020499	mrps-18.C	T14B4.2	p > 0.05, not analyzed	p > 0.05, not analyzed	193.326	185.693	248.776	221.015	281.059	316.624	0.382675	0.184219	2.07728	0.0377753	0.974895
WBGene00022118	dnc-5	Y71F9AL.14	p > 0.05, not analyzed	p > 0.05, not analyzed	217.325	239.302	296.617	302.451	274.041	404.134	0.378616	0.182359	2.07621	0.0378743	0.975573
WBGene00011035	snrp-27	R05D11.7	p > 0.05, not analyzed	p > 0.05, not analyzed	476.151	457.389	562.127	537.335	585.623	725.091	0.305336	0.147305	2.07282	0.0381893	0.981802
WBGene00010238	F58B4.5	F58B4.5	p > 0.05, not analyzed	p > 0.05, not analyzed	148.632	179.886	155.035	203.613	240.55	184.903	0.379034	0.183059	2.07056	0.0383996	0.981881
WBGene00018298	nlp-50	F41G3.1	p > 0.05, not analyzed	p > 0.05, not analyzed	4.84827	13.4177	14.7937	24.6795	20.1682	26.3663	1.08126	0.521938	2.07163	0.0383002	0.981881
WBGene00019987	R09F10.3	R09F10.3	p > 0.05, not analyzed	p > 0.05, not analyzed	136.458	181.542	152.498	237.873	185.914	194.444	0.389187	0.187974	2.07043	0.0384119	0.981881
WBGene00007517	gpx-3	C11E4.2	p > 0.05, not analyzed	p > 0.05, not analyzed	34.2832	12.8426	30.359	9.64941	19.4217	5.94899	-1.14062	0.551345	-2.06879	0.0385656	0.982915
WBGene00019800	mtss-1	PAR2.1	p > 0.05, not analyzed	p > 0.05, not analyzed	768.028	843.12	1039.8	859.079	1171.66	1285.81	0.323032	0.156172	2.06844	0.0385988	0.982915
WBGene00022610	ltah-1.2	ZC416.6	p > 0.05, not analyzed	p > 0.05, not analyzed	630.979	597.806	497.44	509.385	457.906	451.05	-0.282831	0.136813	-2.06728	0.0387077	0.98382
WBGene00219218	Y73B6BL.288	Y73B6BL.288	p > 0.05, not analyzed	p > 0.05, not analyzed	52.6984	65.5166	42.7989	75.0414	81.7991	79.6323	0.559354	0.270867	2.06505	0.0389181	0.9873
IR1_CE_DNA_transposon	Repetitive element		p > 0.05, not analyzed	p > 0.05, not analyzed	4.93092	9.89181	11.5971	2.14191	2.57739	2.49014	-1.87888	0.910403	-2.06379	0.0390376	0.987359
WBGene00006652	ttx-1	Y113G7A.6	p > 0.05, not analyzed	p > 0.05, not analyzed	28.12	20.181	8.22086	9.27285	9.12736	4.80193	-1.29073	0.625511	-2.06347	0.0390676	0.987359
WBGene00022281	abtm-1	Y74C10AR.3	p > 0.05, not analyzed	p > 0.05, not analyzed	920.923	905.689	681.416	782.046	650.547	597.806	-0.304759	0.147833	-2.0615	0.039255	0.99023
WBGene00003926	pas-5	F25H2.9	p > 0.05, not analyzed	p > 0.05, not analyzed	2711.17	2828.41	3280.05	3182.98	3251.87	4094.15	0.255486	0.124019	2.06005	0.0393937	0.991864
WBGene00000835	cuc-1	ZK652.11	p > 0.05, not analyzed	p > 0.05, not analyzed	438.922	438.373	563.609	496.824	579.3	737.001	0.331213	0.162318	2.04053	0.0412979	0.992851
WBGene00001876	his-2	T10C6.13	p > 0.05, not analyzed	p > 0.05, not analyzed	737.346	762.124	815.245	757.567	899.798	1228.66	0.318985	0.156375	2.03988	0.0413625	0.992851
WBGene00001922	his-48	B0035.8	p > 0.05, not analyzed	p > 0.05, not analyzed	6345.91	7097.42	6587.34	6781.46	7627.05	9401.92	0.249486	0.122422	2.03793	0.0415571	0.992851
WBGene00003611	nhr-12	R04B5.4	p > 0.05, not analyzed	p > 0.05, not analyzed	141.588	164.97	221.825	215.216	216.84	266.092	0.397516	0.194366	2.04519	0.0408359	0.992851
WBGene00005002	spp-17	C54G6.5	p > 0.05, not analyzed	p > 0.05, not analyzed	605.163	714.485	677.605	748.962	763.606	874.958	0.256964	0.125212	2.05224	0.0401467	0.992851
WBGene00006397	taf-13	C14A4.10	p > 0.05, not analyzed	p > 0.05, not analyzed	311.87	399.997	449.728	413.102	486.612	567.289	0.335118	0.164621	2.03569	0.0417811	0.992851
WBGene00006515	txdc-9	C05D11.3	p > 0.05, not analyzed	p > 0.05, not analyzed	699.132	755.573	945.871	889.89	934.89	1103.11	0.285475	0.139802	2.04199	0.0411525	0.992851
WBGene00006582	tmd-2	C08D8.2	p > 0.05, not analyzed	p > 0.05, not analyzed	78.8459	52.099	76.9773	38.352	59.805	36.3248	-0.631018	0.308284	-2.04687	0.040671	0.992851
WBGene00006820	unc-89	C09D1.1	p > 0.05, not analyzed	p > 0.05, not analyzed	2056.86	1580.38	1593.51	1046.75	1557.29	843.875	-0.600931	0.295415	-2.03419	0.0419325	0.992851
WBGene00007228	acs-7	C01G6.7	p > 0.05, not analyzed	p > 0.05, not analyzed	121.699	72.8195	85.3484	66.4336	65.1701	61.1939	-0.533105	0.261536	-2.03836	0.0415143	0.992851
WBGene00007709	clec-87	C25A1.8	p > 0.05, not analyzed	p > 0.05, not analyzed	11090.3	11265.9	9941.14	12198.7	11861.3	12977.4	0.197683	0.0964602	2.04937	0.0404255	0.992851
WBGene00008341	ttr-44	C56A3.2	p > 0.05, not analyzed	p > 0.05, not analyzed	65.6391	65.1958	56.6088	116.098	76.3619	80.6206	0.536517	0.262393	2.04471	0.0408834	0.992851
WBGene00008394	D1086.7	D1086.7	p > 0.05, not analyzed	p > 0.05, not analyzed	234.356	251.395	334.894	282.964	353.681	431.142	0.379003	0.184907	2.04969	0.0403945	0.992851
WBGene00008417	D2030.7	D2030.7	p > 0.05, not analyzed	p > 0.05, not analyzed	946.282	1126.9	1188.2	1243.01	1290.1	1321.58	0.240086	0.117528	2.04279	0.0410728	0.992851
WBGene00008851	F15B9.8	F15B9.8	p > 0.05, not analyzed	p > 0.05, not analyzed	26.8808	23.3619	39.6291	11.7966	16.0198	19.6837	-0.916258	0.448724	-2.04192	0.0411596	0.992851
WBGene00009347	F32H5.1	F32H5.1	p > 0.05, not analyzed	p > 0.05, not analyzed	182.94	214.167	188.288	182.193	140.586	122.91	-0.399613	0.194537	-2.05418	0.0399584	0.992851
WBGene00010089	hpo-31	F55B12.4	p > 0.05, not analyzed	p > 0.05, not analyzed	633.372	683.99	716.512	742.689	803.119	873.064	0.250051	0.121605	2.05625	0.0397584	0.992851
WBGene00011740	mrpl-51	T12G3.5	p > 0.05, not analyzed	p > 0.05, not analyzed	598.248	665.772	893.67	754.877	856.382	1125.74	0.342357	0.16836	2.03347	0.0420047	0.992851
WBGene00011741	T12G3.6	T12G3.6	p > 0.05, not analyzed	p > 0.05, not analyzed	1356.87	1342.98	1496.97	1481.46	1640.99	1809.64	0.23313	0.114171	2.04194	0.0411579	0.992851
WBGene00012085	T27D12.1	T27D12.1	p > 0.05, not analyzed	p > 0.05, not analyzed	108.813	86.7033	100.481	68.3247	61.7325	79.7226	-0.494319	0.241403	-2.04769	0.0405903	0.992851
WBGene00012222	W03C9.6	W03C9.6	p > 0.05, not analyzed	p > 0.05, not analyzed	22.1269	20.6494	22.0557	41.789	43.4487	27.6641	0.796407	0.391964	2.03184	0.0421703	0.992851
WBGene00015238	mppe-1	B0511.13	p > 0.05, not analyzed	p > 0.05, not analyzed	126.985	117.128	119.522	144.66	157.564	175.165	0.395375	0.192918	2.04944	0.0404192	0.992851
WBGene00016182	C28C12.12	C28C12.12	p > 0.05, not analyzed	p > 0.05, not analyzed	948.119	935.591	1078	1095.25	1194.93	1190.03	0.232383	0.11326	2.05177	0.0401925	0.992851
WBGene00018268	F41C3.2	F41C3.2	p > 0.05, not analyzed	p > 0.05, not analyzed	122.943	110.911	127.584	97.5054	75.5615	92.172	-0.449957	0.219465	-2.05024	0.040341	0.992851
WBGene00018340	anmt-2	F42A10.3	p > 0.05, not analyzed	p > 0.05, not analyzed	155.856	105.811	139.368	91.1034	109.353	91.9087	-0.452595	0.221326	-2.04493	0.0408617	0.992851
WBGene00020027	R12C12.7	R12C12.7	p > 0.05, not analyzed	p > 0.05, not analyzed	432	499.925	666.076	537.185	687.268	833.403	0.364029	0.177082	2.05571	0.0398102	0.992851
WBGene00020058	R13D11.4	R13D11.4	p > 0.05, not analyzed	p > 0.05, not analyzed	17.8542	13.2699	27.7499	14.0879	7.4633	5.22448	-1.20042	0.585362	-2.05073	0.040293	0.992851
WBGene00020155	T02B11.3	T02B11.3	p > 0.05, not analyzed	p > 0.05, not analyzed	165.066	93.6881	210.791	109.379	135.803	72.5757	-0.566555	0.278448	-2.03469	0.0418819	0.992851
WBGene00020783	blos-4	T24H7.4	p > 0.05, not analyzed	p > 0.05, not analyzed	193.756	241.158	333.433	235.823	350.086	478.473	0.469382	0.228745	2.05199	0.0401708	0.992851
WBGene00020954	W02G9.4	W02G9.4	p > 0.05, not analyzed	p > 0.05, not analyzed	80.458	120.496	71.2039	64.4126	70.2531	48.2625	-0.569973	0.277665	-2.05273	0.0400986	0.992851
WBGene00021406	frm-5.2	Y38C1AB.4	p > 0.05, not analyzed	p > 0.05, not analyzed	161.337	160.957	92.5348	97.4747	99.1781	99.1042	-0.481937	0.236755	-2.03559	0.0417914	0.992851
WBGene00022323	Y82E9BL.6	Y82E9BL.6	p > 0.05, not analyzed	p > 0.05, not analyzed	1.22672	3.23405	0	10.7187	6.13357	5.06621	2.31575	1.13689	2.03693	0.0416574	0.992851
WBGene00022393	abhd-12	Y97E10AL.2	p > 0.05, not analyzed	p > 0.05, not analyzed	1354.49	1529.86	1534.7	1641.86	1701.43	1790.27	0.215892	0.106219	2.03251	0.0421022	0.992851
WBGene00044079	tag-241	C34E11.3	p > 0.05, not analyzed	p > 0.05, not analyzed	150.889	135.453	134.564	85.2658	136.596	82.1691	-0.470832	0.231617	-2.0328	0.0420726	0.992851
WBGene00044794	Y59A8B.25	Y59A8B.25	p > 0.05, not analyzed	p > 0.05, not analyzed	29.1117	70.365	69.4752	82.6218	78.6306	99.9388	0.616498	0.302682	2.03678	0.0416717	0.992851
WBGene00255598	BE0003N10.6	BE0003N10.6	p > 0.05, not analyzed	p > 0.05, not analyzed	3.48098	2.63139	7.46731	6.99947	89.411	4.27397	2.696	1.31991	2.04256	0.0410956	0.992851
WBGene00302998	F53G2.12	F53G2.12	p > 0.05, not analyzed	p > 0.05, not analyzed	134.301	125.583	166.813	361.353	348.909	127.934	0.967664	0.470573	2.05635	0.0397485	0.992851
WBGene00001898	his-24	M163.3	p > 0.05, not analyzed	p > 0.05, not analyzed	128.709	106.417	120.857	83.615	80.8518	96.5054	-0.445009	0.219454	-2.0278	0.0425805	0.994432
WBGene00010747	K10D11.3	K10D11.3	p > 0.05, not analyzed	p > 0.05, not analyzed	9.54587	10.767	9.01117	3.12051	2.53122	3.54315	-1.67557	0.826316	-2.02775	0.0425853	0.994432
WBGene00012732	wac-1.2	Y40B1A.1	p > 0.05, not analyzed	p > 0.05, not analyzed	223.081	155.798	86.3896	76.2563	119.85	105.047	-0.573144	0.282659	-2.02769	0.0425921	0.994432
WBGene00015728	C13A10.1	C13A10.1	p > 0.05, not analyzed	p > 0.05, not analyzed	36.5061	42.5161	25.3656	22.8028	15.7157	20.2125	-0.83158	0.410108	-2.02771	0.0425896	0.994432
WBGene00020376	T09B4.2	T09B4.2	p > 0.05, not analyzed	p > 0.05, not analyzed	710.429	845.895	977.967	881.047	1022.52	1215.8	0.299179	0.147558	2.02753	0.0426079	0.994432
WBGene00007913	cyp-36A1	C34B7.3	p > 0.05, not analyzed	p > 0.05, not analyzed	84.8315	58.7197	77.7035	46.0739	63.4	36.0298	-0.602961	0.29776	-2.02499	0.0428681	0.997037
WBGene00014947	Y71A12B.14	Y71A12B.14	p > 0.05, not analyzed	p > 0.05, not analyzed	17.1375	25.662	14.2218	11.7941	7.95267	5.9538	-1.16471	0.575133	-2.02512	0.0428553	0.997037
WBGene00015613	C08F1.10	C08F1.10	p > 0.05, not analyzed	p > 0.05, not analyzed	33.1097	22.6075	28.579	13.935	15.7942	15.2171	-0.901366	0.445284	-2.02425	0.0429446	0.997087
WBGene00009820	F47B10.9	F47B10.9	p > 0.05, not analyzed	p > 0.05, not analyzed	100.526	103.233	102.804	129.709	129.134	148.938	0.412632	0.20401	2.02261	0.0431136	0.99756
WBGene00016501	C37C3.9	C37C3.9	p > 0.05, not analyzed	p > 0.05, not analyzed	1589.27	1663.89	1624.5	1822.43	1935.28	1843.37	0.199556	0.0986491	2.02289	0.0430848	0.99756
WBGene00002130	inx-8	ZK792.2	p > 0.05, not analyzed	p > 0.05, not analyzed	1363.46	1389.16	1384.73	1546.39	1544.5	1681.03	0.206062	0.101961	2.02098	0.043282	0.99912
WBGene00012878	Y45F10C.2	Y45F10C.2	p > 0.05, not analyzed	p > 0.05, not analyzed	78.9457	54.0375	75.263	103.003	77.3752	118.734	0.524432	0.259554	2.02052	0.04333	0.99912
WBGene00007351	C05G5.5	C05G5.5	p > 0.05, not analyzed	p > 0.05, not analyzed	12.4861	5.10647	6.56634	2.32247	2.47149	1.82011	-1.88558	0.934705	-2.0173	0.0436638	0.999946
WBGene00015853	C16C8.16	C16C8.16	p > 0.05, not analyzed	p > 0.05, not analyzed	387.262	488.643	632.431	522.076	658.854	749.793	0.35479	0.175709	2.01919	0.043468	0.999946
WBGene00016373	swd-2.1	C33H5.6	p > 0.05, not analyzed	p > 0.05, not analyzed	452.852	488.069	586.148	543.403	635.062	689.68	0.290152	0.143742	2.01855	0.0435336	0.999946
WBGene00016378	imp-3	C33H5.11	p > 0.05, not analyzed	p > 0.05, not analyzed	594.568	601.438	633.314	734.617	728.946	691.385	0.235055	0.116478	2.01802	0.0435895	0.999946
CELE12A_DNA_transposon	Repetitive element		p > 0.05, not analyzed	p > 0.05, not analyzed	7.39638	8.79272	12.5635	1.07095	6.87304	8.30046	-0.799355	0.784552	-1.01887	0.308266	0.999962
CELE12B_DNA_transposon	Repetitive element		p > 0.05, not analyzed	p > 0.05, not analyzed	9.86184	7.69363	3.86568	13.9224	7.73217	9.96055	0.571708	0.700061	0.816655	0.414126	0.999962
CELE14A_DNA_transposon	Repetitive element		p > 0.05, not analyzed	p > 0.05, not analyzed	24.6546	37.3691	32.8583	28.9158	30.9287	19.0911	-0.27468	0.395054	-0.695297	0.486869	0.999962
CELE14B_DNA_transposon	Repetitive element		p > 0.05, not analyzed	p > 0.05, not analyzed	241.615	326.43	235.807	244.178	224.233	205.021	-0.257149	0.17479	-1.47119	0.141239	0.999962
CELE2_DNA_transposon	Repetitive element		p > 0.05, not analyzed	p > 0.05, not analyzed	72.7311	93.4226	95.6757	65.3282	73.0261	64.7436	-0.369866	0.248006	-1.49136	0.135867	0.999962
CELE4_DNA_transposon	Repetitive element		p > 0.05, not analyzed	p > 0.05, not analyzed	38.2146	34.0718	32.8583	22.49	27.4922	10.7906	-0.795096	0.421984	-1.88419	0.0595397	0.999962
CELE42_DNA_transposon	Repetitive element		p > 0.05, not analyzed	p > 0.05, not analyzed	118.342	118.702	140.131	109.237	116.842	113.716	-0.152438	0.203839	-0.747834	0.454561	0.999962
CELE45_SINE2_tRNA	Repetitive element		p > 0.05, not analyzed	p > 0.05, not analyzed	9565.99	13260.5	17422.6	11464.6	10892.1	13640.1	-0.161207	0.163773	-0.984332	0.324952	0.999962
CELE46A_DNA_transposon	Repetitive element		p > 0.05, not analyzed	p > 0.05, not analyzed	3.69819	3.29727	5.79853	5.35477	0	2.49014	-0.754154	1.16038	-0.649918	0.515745	0.999962
CELE46B_DNA_transposon	Repetitive element		p > 0.05, not analyzed	p > 0.05, not analyzed	69.0329	62.6481	61.851	91.0311	56.7026	34.8619	-0.0949923	0.322247	-0.294781	0.768161	0.999962
CELE7_DNA_transposon	Repetitive element		p > 0.05, not analyzed	p > 0.05, not analyzed	7.39638	8.79272	9.66421	7.49668	5.15478	9.13051	-0.252315	0.709781	-0.355482	0.722228	0.999962
CELETC2_DNA_transposon	Repetitive element		p > 0.05, not analyzed	p > 0.05, not analyzed	88.7566	96.7199	89.8772	91.0311	80.7583	52.2929	-0.304725	0.257882	-1.18165	0.237347	0.999962
CEMUDR1_MuDR	Repetitive element		p > 0.05, not analyzed	p > 0.05, not analyzed	695.26	731.994	658.133	639.36	617.715	543.68	-0.212453	0.12412	-1.71167	0.0869572	0.999962
CEMUDR2_MuDR	Repetitive element		p > 0.05, not analyzed	p > 0.05, not analyzed	125.739	125.296	117.903	113.521	99.6591	95.4553	-0.259934	0.207938	-1.25006	0.211279	0.999962
CER1_Gypsy	Repetitive element		p > 0.05, not analyzed	p > 0.05, not analyzed	6969.86	7159.47	5104.64	6787.71	6007.04	5172.02	-0.0983024	0.137975	-0.712466	0.476176	0.999962
CER10_I_CE_LTR_Retrotransposon	Repetitive element		p > 0.05, not analyzed	p > 0.05, not analyzed	474.601	662.751	882.343	497.994	776.654	1169.53	0.275206	0.428743	0.641889	0.520945	0.999962
CER13_I_CE_LTR_Retrotransposon	Repetitive element		p > 0.05, not analyzed	p > 0.05, not analyzed	1.23273	2.19818	7.73137	2.14191	5.15478	8.30046	0.464651	1.01803	0.456424	0.648085	0.999962
CER15_1_I_CE_LTR_Retrotransposon	Repetitive element		p > 0.05, not analyzed	p > 0.05, not analyzed	86.2911	86.8281	107.273	80.3216	108.25	131.977	0.196015	0.242019	0.809917	0.417988	0.999962
CER15_I_CE_LTR_Retrotransposon	Repetitive element		p > 0.05, not analyzed	p > 0.05, not analyzed	50.5419	62.6481	58.9517	41.7672	50.6887	64.7436	-0.126295	0.294554	-0.428767	0.668092	0.999962
CER16_1_LTR_CE_LTR_Retrotransposon	Repetitive element		p > 0.05, not analyzed	p > 0.05, not analyzed	3.69819	6.59454	3.86568	3.21286	6.01391	4.15023	-0.0726419	0.928933	-0.0781993	0.93767	0.999962
CER16_2_I_CE_LTR_Retrotransposon	Repetitive element		p > 0.05, not analyzed	p > 0.05, not analyzed	3170.58	2045.41	3056.79	2688.1	2191.64	3040.46	-0.0627759	0.157425	-0.398767	0.690065	0.999962
CER16_2_LTR_CE_LTR_Retrotransposon	Repetitive element		p > 0.05, not analyzed	p > 0.05, not analyzed	12.3273	45.0627	25.127	23.561	13.7461	9.13051	-0.853001	0.526398	-1.62045	0.105136	0.999962
CER16_LTR_CE_LTR_Retrotransposon	Repetitive element		p > 0.05, not analyzed	p > 0.05, not analyzed	8.62911	7.69363	13.5299	7.49668	5.15478	5.81032	-0.711886	0.71408	-0.996928	0.318799	0.999962
CER17_I_CE_LTR_Retrotransposon	Repetitive element		p > 0.05, not analyzed	p > 0.05, not analyzed	167.651	106.612	153.661	103.883	103.096	142.768	-0.286714	0.227896	-1.25809	0.208358	0.999962
CER17_LTR_CE_LTR_Retrotransposon	Repetitive element		p > 0.05, not analyzed	p > 0.05, not analyzed	8.62911	3.29727	3.86568	4.28382	7.73217	5.81032	0.203448	0.860022	0.236562	0.812997	0.999962
CER2_I_CE_LTR_Retrotransposon	Repetitive element		p > 0.05, not analyzed	p > 0.05, not analyzed	166.419	205.53	162.359	192.772	134.024	136.128	-0.212479	0.202195	-1.05086	0.293323	0.999962
CER2_LTR_CE_LTR_Retrotransposon	Repetitive element		p > 0.05, not analyzed	p > 0.05, not analyzed	25.8873	35.1709	15.4627	18.2062	8.5913	20.7512	-0.683715	0.497625	-1.37396	0.169455	0.999962
CER3_1_LTR_CE_LTR_Retrotransposon	Repetitive element		p > 0.05, not analyzed	p > 0.05, not analyzed	60.4038	54.9545	85.0451	84.6054	73.0261	97.9454	0.344888	0.265343	1.29978	0.193676	0.999962
CER3_I_CE_LTR_Retrotransposon	Repetitive element		p > 0.05, not analyzed	p > 0.05, not analyzed	62.8693	92.3235	70.5487	71.754	57.5617	48.9727	-0.348993	0.27651	-1.26214	0.2069	0.999962
CER7_I_CE_LTR_Retrotransposon	Repetitive element		p > 0.05, not analyzed	p > 0.05, not analyzed	45.611	43.9636	38.6568	38.5544	36.9426	28.2216	-0.308035	0.335811	-0.917286	0.358993	0.999962
CER8_I_CE_LTR_Retrotransposon	Repetitive element		p > 0.05, not analyzed	p > 0.05, not analyzed	55.4729	50.5581	44.4554	41.7672	45.5339	45.6525	-0.172369	0.302551	-0.569718	0.568869	0.999962
CER8_LTR_CE_LTR_Retrotransposon	Repetitive element		p > 0.05, not analyzed	p > 0.05, not analyzed	3.69819	5.49545	3.86568	10.7095	1.71826	1.66009	0.0667833	1.01767	0.0656238	0.947677	0.999962
CER9_I_CE_LTR_Retrotransposon	Repetitive element		p > 0.05, not analyzed	p > 0.05, not analyzed	76.4293	65.9454	46.3882	50.3349	44.6748	34.0319	-0.547989	0.310529	-1.7647	0.0776149	0.999962
CER9_LTR_CE_LTR_Retrotransposon	Repetitive element		p > 0.05, not analyzed	p > 0.05, not analyzed	11.0946	14.2882	8.69779	8.56764	4.29565	7.47041	-0.75139	0.680377	-1.10437	0.269431	0.999962
CEREP1A_DNA_transposon	Repetitive element		p > 0.05, not analyzed	p > 0.05, not analyzed	1047.82	1113.38	1037.94	1050.61	1064.46	1074.91	-0.00390215	0.105659	-0.0369317	0.970539	0.999962
Chapaev_1_CE_Chapaev	Repetitive element		p > 0.05, not analyzed	p > 0.05, not analyzed	1690.07	1705.79	1500.85	1755.29	1638.36	1689.97	0.0543401	0.105048	0.517288	0.604955	0.999962
DNA_3_1_CE_DNA_transposon	Repetitive element		p > 0.05, not analyzed	p > 0.05, not analyzed	17.2582	13.1891	22.2277	12.8515	13.7461	15.7709	-0.315845	0.512015	-0.616867	0.537323	0.999962
DNA_8_1_CE_DNA_transposon	Repetitive element		p > 0.05, not analyzed	p > 0.05, not analyzed	2.46546	6.59454	13.5299	2.14191	1.71826	4.15023	-1.50364	0.972953	-1.54544	0.122241	0.999962
HAT1_CE_hAT	Repetitive element		p > 0.05, not analyzed	p > 0.05, not analyzed	92.4548	81.3326	96.6421	81.3925	74.7443	68.0638	-0.274629	0.238513	-1.15142	0.249559	0.999962
HAT2_CE_hAT	Repetitive element		p > 0.05, not analyzed	p > 0.05, not analyzed	53.0074	36.27	49.2875	32.1286	42.9565	39.8422	-0.262995	0.327875	-0.802118	0.422485	0.999962
HAT3_CE_hAT	Repetitive element		p > 0.05, not analyzed	p > 0.05, not analyzed	17.2582	12.09	9.66421	10.7095	19.76	8.30046	0.00594464	0.58971	0.0100806	0.991957	0.999962
HAT4_CE_hAT	Repetitive element		p > 0.05, not analyzed	p > 0.05, not analyzed	44.3783	68.1436	65.7166	49.2639	61.8574	48.1427	-0.166664	0.294136	-0.566621	0.570971	0.999962
HELITRON1_CE_Helitron	Repetitive element		p > 0.05, not analyzed	p > 0.05, not analyzed	125.739	163.764	147.862	118.876	121.137	109.566	-0.32632	0.200516	-1.6274	0.103652	0.999962
HELITRON2_CE_Helitron	Repetitive element		p > 0.05, not analyzed	p > 0.05, not analyzed	160.255	134.089	106.306	133.869	79.04	80.5145	-0.453891	0.24951	-1.81913	0.0688914	0.999962
HELITRONY1_CE_Helitron	Repetitive element		p > 0.05, not analyzed	p > 0.05, not analyzed	62.8693	50.5581	66.6831	49.2639	54.1252	33.2018	-0.404012	0.3057	-1.32159	0.186303	0.999962
HELITRONY1A_CE_Helitron	Repetitive element		p > 0.05, not analyzed	p > 0.05, not analyzed	125.739	82.4317	112.105	83.5345	98.8	85.4947	-0.254547	0.235032	-1.08303	0.278795	0.999962
HELITRONY2_CE_Helitron	Repetitive element		p > 0.05, not analyzed	p > 0.05, not analyzed	92.4548	120.9	86.0115	128.515	86.7722	93.7952	0.040916	0.240819	0.169903	0.865086	0.999962
HELITRONY3_CE_Helitron	Repetitive element		p > 0.05, not analyzed	p > 0.05, not analyzed	30.8183	25.2791	22.2277	14.9934	19.76	19.9211	-0.505253	0.435832	-1.15929	0.24634	0.999962
HELITRONY4_CE_Helitron	Repetitive element		p > 0.05, not analyzed	p > 0.05, not analyzed	237.917	242.899	323.751	234.539	220.797	206.681	-0.286477	0.17188	-1.66672	0.0955701	0.999962
IR3_CE_DNA_transposon	Repetitive element		p > 0.05, not analyzed	p > 0.05, not analyzed	6.16365	10.9909	5.79853	4.28382	12.0278	9.13051	0.165678	0.731683	0.226435	0.820863	0.999962
LINE2A_CE_CR1	Repetitive element		p > 0.05, not analyzed	p > 0.05, not analyzed	16.0255	26.3782	28.0262	16.0643	22.3374	17.431	-0.339884	0.454594	-0.747664	0.454663	0.999962
LINE2B_CE_CR1	Repetitive element		p > 0.05, not analyzed	p > 0.05, not analyzed	4.93092	1.09909	2.89926	5.35477	1.71826	9.13051	0.878441	1.05259	0.834555	0.403968	0.999962
LINE2C_CE_CR1	Repetitive element		p > 0.05, not analyzed	p > 0.05, not analyzed	19.7237	6.59454	11.5971	11.7805	5.15478	9.13051	-0.542432	0.657786	-0.824632	0.409581	0.999962
LINE2C1_CE_CR1	Repetitive element		p > 0.05, not analyzed	p > 0.05, not analyzed	43.1456	57.1527	43.489	46.051	44.6748	53.953	0.01088	0.305526	0.0356108	0.971593	0.999962
LINE2D_CE_CR1	Repetitive element		p > 0.05, not analyzed	p > 0.05, not analyzed	28.3528	8.79272	14.4963	16.0643	18.9009	10.7906	-0.163965	0.549957	-0.298142	0.765595	0.999962
LINE2F_CE_CR1	Repetitive element		p > 0.05, not analyzed	p > 0.05, not analyzed	2.46546	6.59454	6.76495	3.21286	5.15478	7.47041	-9.7671e-05	0.885103	-0.00011035	0.999912	0.999962
LINE2G_CE_CR1	Repetitive element		p > 0.05, not analyzed	p > 0.05, not analyzed	30.8183	26.3782	47.3546	38.5544	29.2104	28.2216	-0.138714	0.375923	-0.368996	0.712131	0.999962
LINE2H_CE_CR1	Repetitive element		p > 0.05, not analyzed	p > 0.05, not analyzed	20.9564	14.2882	9.66421	3.21286	9.45043	9.13051	-1.0073	0.647221	-1.55634	0.119627	0.999962
LONGPAL1_DNA_transposon	Repetitive element		p > 0.05, not analyzed	p > 0.05, not analyzed	19.7237	36.27	38.6568	38.5544	20.6191	39.8422	0.0514121	0.402371	0.127773	0.898329	0.999962
LONGPAL2_MuDR	Repetitive element		p > 0.05, not analyzed	p > 0.05, not analyzed	45.611	29.6754	43.489	16.0643	24.0557	36.522	-0.617124	0.395491	-1.5604	0.118665	0.999962
LONGPAL3_MuDR	Repetitive element		p > 0.05, not analyzed	p > 0.05, not analyzed	20.9564	27.4772	23.1941	23.561	31.7878	27.3915	0.210807	0.404982	0.520535	0.602691	0.999962
LTR1_CE_LTR_Retrotransposon	Repetitive element		p > 0.05, not analyzed	p > 0.05, not analyzed	14.7928	6.59454	6.76495	2.14191	6.01391	14.9408	-0.246638	0.770379	-0.320152	0.748853	0.999962
LTRCER1_Gypsy	Repetitive element		p > 0.05, not analyzed	p > 0.05, not analyzed	404.336	407.762	330.516	441.233	311.864	311.267	-0.104425	0.16792	-0.621873	0.534026	0.999962
MAR_CE_Mariner_Tc1	Repetitive element		p > 0.05, not analyzed	p > 0.05, not analyzed	24.6546	20.8827	31.8919	21.4191	31.7878	20.7512	-0.0681802	0.419423	-0.162557	0.870867	0.999962
MARINCE1_Mariner_Tc1	Repetitive element		p > 0.05, not analyzed	p > 0.05, not analyzed	34.5165	25.2791	16.4292	41.7672	36.0835	33.2018	0.554352	0.390183	1.42075	0.15539	0.999962
MARINER2_CE_Mariner_Tc1	Repetitive element		p > 0.05, not analyzed	p > 0.05, not analyzed	113.411	127.494	124.668	152.076	127.151	117.867	0.11346	0.203602	0.557261	0.577349	0.999962
MARINER3_CE_Mariner_Tc1	Repetitive element		p > 0.05, not analyzed	p > 0.05, not analyzed	36.9819	36.27	38.6568	41.7672	28.3513	29.0516	-0.184746	0.352933	-0.52346	0.600654	0.999962
MARINER5_CE_Mariner_Tc1	Repetitive element		p > 0.05, not analyzed	p > 0.05, not analyzed	28.3528	30.7745	33.8247	26.7739	21.4783	19.0911	-0.47637	0.397557	-1.19824	0.230822	0.999962
Merlin1m_CE_Merlin	Repetitive element		p > 0.05, not analyzed	p > 0.05, not analyzed	28.3528	19.7836	28.0262	34.2705	39.52	16.6009	0.241825	0.427407	0.565796	0.571533	0.999962
NDNAX1_CE_Helitron	Repetitive element		p > 0.05, not analyzed	p > 0.05, not analyzed	55.4729	75.8372	54.1196	49.2639	50.6887	48.1427	-0.323889	0.287869	-1.12512	0.260537	0.999962
NDNAX2_CE_Helitron	Repetitive element		p > 0.05, not analyzed	p > 0.05, not analyzed	59.1711	97.819	53.1532	76.0378	73.8852	79.6844	0.12966	0.277333	0.467525	0.640125	0.999962
NDNAX3_CE_Helitron	Repetitive element		p > 0.05, not analyzed	p > 0.05, not analyzed	282.295	289.061	287.027	303.08	247.43	205.021	-0.188772	0.169346	-1.11471	0.264973	0.999962
NeSL_1_NeSL	Repetitive element		p > 0.05, not analyzed	p > 0.05, not analyzed	134.368	185.746	116.937	178.849	165.812	132.807	0.126359	0.214929	0.587909	0.556593	0.999962
NPAL5A_CE_DNA_transposon	Repetitive element		p > 0.05, not analyzed	p > 0.05, not analyzed	4.93092	14.2882	15.4627	12.8515	19.76	12.4507	0.362666	0.588018	0.616761	0.537392	0.999962
NTC2A_DNA_transposon	Repetitive element		p > 0.05, not analyzed	p > 0.05, not analyzed	41.9128	25.2791	30.9255	38.5544	31.7878	36.522	0.12734	0.361695	0.352065	0.72479	0.999962
PAL3A_CE_DNA_transposon	Repetitive element		p > 0.05, not analyzed	p > 0.05, not analyzed	6.16365	3.29727	9.66421	3.21286	10.3096	4.98028	-0.0442026	0.837546	-0.0527763	0.95791	0.999962
PAL5A_CE_DNA_transposon	Repetitive element		p > 0.05, not analyzed	p > 0.05, not analyzed	1137.81	1268.35	1416.77	1154.49	1060.17	1034.24	-0.236485	0.11847	-1.99617	0.0459156	0.999962
PAL8A_CE_hAT	Repetitive element		p > 0.05, not analyzed	p > 0.05, not analyzed	24.6546	23.0809	32.8583	25.7029	30.9287	20.7512	-0.0655341	0.40666	-0.161152	0.871974	0.999962
PAL8D_CE_hAT	Repetitive element		p > 0.05, not analyzed	p > 0.05, not analyzed	72.7311	59.3508	91.81	117.805	76.4626	66.4037	0.207216	0.278819	0.743191	0.457366	0.999962
PALNN1_CE_DNA_transposon	Repetitive element		p > 0.05, not analyzed	p > 0.05, not analyzed	0	10.9909	13.5299	11.7805	12.0278	6.64037	0.280088	0.779619	0.359263	0.719398	0.999962
PALTA1_CE_DNA_transposon	Repetitive element		p > 0.05, not analyzed	p > 0.05, not analyzed	16.0255	25.2791	17.3956	5.35477	7.73217	14.1108	-1.09041	0.569682	-1.91407	0.0556118	0.999962
PALTA2_CE_DNA_transposon	Repetitive element		p > 0.05, not analyzed	p > 0.05, not analyzed	8.62911	2.19818	4.83211	2.14191	2.57739	1.66009	-1.28563	1.08706	-1.18266	0.236942	0.999962
PALTA4_CE_Mariner_Tc1	Repetitive element		p > 0.05, not analyzed	p > 0.05, not analyzed	4.93092	8.79272	5.79853	2.14191	6.01391	8.30046	-0.225041	0.839895	-0.26794	0.788746	0.999962
PALTTAA1_CE_DNA_transposon	Repetitive element		p > 0.05, not analyzed	p > 0.05, not analyzed	135.6	134.089	138.198	147.792	137.461	134.467	0.0391594	0.189666	0.206465	0.836428	0.999962
PALTTAA3_CE_DNA_transposon	Repetitive element		p > 0.05, not analyzed	p > 0.05, not analyzed	279.83	376.988	330.516	280.59	290.386	283.876	-0.209255	0.154882	-1.35106	0.176676	0.999962
PALTTTAAA1_DNA_transposon	Repetitive element		p > 0.05, not analyzed	p > 0.05, not analyzed	33.2837	25.2791	44.4554	35.3415	19.76	19.0911	-0.493887	0.410359	-1.20355	0.228764	0.999962
PALTTTAAA2_DNA_transposon	Repetitive element		p > 0.05, not analyzed	p > 0.05, not analyzed	4.93092	3.29727	7.73137	6.42573	6.01391	1.66009	-0.205309	0.924049	-0.222184	0.82417	0.999962
PALTTTAAA3_DNA_transposon	Repetitive element		p > 0.05, not analyzed	p > 0.05, not analyzed	57.9383	86.8281	61.851	41.7672	61.8574	54.783	-0.377564	0.289955	-1.30215	0.192866	0.999962
RTE_1_RTE	Repetitive element		p > 0.05, not analyzed	p > 0.05, not analyzed	179.979	152.773	154.627	146.721	151.207	107.906	-0.264948	0.201059	-1.31777	0.187582	0.999962
SINE1_CE_SINE	Repetitive element		p > 0.05, not analyzed	p > 0.05, not analyzed	60.4038	80.2336	69.5823	74.9668	85.0539	75.5342	0.162904	0.251507	0.647711	0.517172	0.999962
TC1_Mariner_Tc1	Repetitive element		p > 0.05, not analyzed	p > 0.05, not analyzed	92.4548	104.414	93.7429	98.5278	86.7722	82.1746	-0.123456	0.226071	-0.546097	0.585	0.999962
TC1A_Mariner_Tc1	Repetitive element		p > 0.05, not analyzed	p > 0.05, not analyzed	263.804	222.016	168.157	255.958	211.346	167.669	-0.0421139	0.203744	-0.2067	0.836244	0.999962
TC2_Mariner_Tc1	Repetitive element		p > 0.05, not analyzed	p > 0.05, not analyzed	14.7928	30.7745	29.9591	23.561	13.7461	14.9408	-0.554238	0.471709	-1.17496	0.240012	0.999962
Tc3_Mariner_Tc1	Repetitive element		p > 0.05, not analyzed	p > 0.05, not analyzed	124.506	100.017	133.366	97.4569	96.2226	72.214	-0.433484	0.229516	-1.88869	0.0589334	0.999962
TC4_DNA_transposon	Repetitive element		p > 0.05, not analyzed	p > 0.05, not analyzed	124.506	123.098	119.836	124.231	92.7861	90.475	-0.26297	0.216634	-1.21389	0.224789	0.999962
TC5_Mariner_Tc1	Repetitive element		p > 0.05, not analyzed	p > 0.05, not analyzed	61.6365	67.0445	72.4816	67.4701	61.8574	54.783	-0.134512	0.265208	-0.507196	0.612018	0.999962
TC5A_Mariner_Tc1	Repetitive element		p > 0.05, not analyzed	p > 0.05, not analyzed	533.772	582.518	555.692	517.271	488.845	461.506	-0.189658	0.125397	-1.51246	0.130417	0.999962
TC5B_Mariner_Tc1	Repetitive element		p > 0.05, not analyzed	p > 0.05, not analyzed	4.93092	8.79272	5.79853	7.49668	7.73217	6.64037	0.1597	0.758891	0.210438	0.833326	0.999962
TC6_Transposable_Element	Repetitive element		p > 0.05, not analyzed	p > 0.05, not analyzed	470.903	434.14	400.098	520.484	436.438	376.841	0.0300308	0.150318	0.199782	0.841651	0.999962
TIR21T5A_CE_DNA_transposon	Repetitive element		p > 0.05, not analyzed	p > 0.05, not analyzed	20.9564	23.0809	16.4292	32.1286	18.9009	24.9014	0.325284	0.440044	0.739209	0.45978	0.999962
TIR23T5A_CE_DNA_transposon	Repetitive element		p > 0.05, not analyzed	p > 0.05, not analyzed	39.4474	40.6663	38.6568	29.9867	46.393	32.3718	-0.121668	0.343398	-0.354306	0.72311	0.999962
TIR43YW1_CE_DNA_transposon	Repetitive element		p > 0.05, not analyzed	p > 0.05, not analyzed	18.491	28.5763	35.7576	27.8448	20.6191	27.3915	-0.141099	0.414019	-0.340802	0.733253	0.999962
TIR54TA1_CE_DNA_transposon	Repetitive element		p > 0.05, not analyzed	p > 0.05, not analyzed	13.56	20.8827	22.2277	16.0643	9.45043	9.13051	-0.73446	0.536367	-1.36932	0.170899	0.999962
TIR9TA1_CE_DNA_transposon	Repetitive element		p > 0.05, not analyzed	p > 0.05, not analyzed	2.46546	7.69363	10.6306	7.49668	1.71826	2.49014	-0.884989	0.933861	-0.947667	0.343299	0.999962
TIR9TA1C_CE_DNA_transposon	Repetitive element		p > 0.05, not analyzed	p > 0.05, not analyzed	4.93092	7.69363	3.86568	0	6.01391	1.66009	-1.06327	1.09416	-0.97176	0.33117	0.999962
TURMOIL1_Harbinger	Repetitive element		p > 0.05, not analyzed	p > 0.05, not analyzed	944.271	1108.98	937.429	968.143	880.609	963.684	-0.0889139	0.118138	-0.752628	0.451674	0.999962
Vingi_1_CE_Vingi	Repetitive element		p > 0.05, not analyzed	p > 0.05, not analyzed	29.5855	32.9727	32.8583	24.632	30.0696	37.3521	-0.0462137	0.371309	-0.124462	0.90095	0.999962
Vingi_2_CE_Vingi	Repetitive element		p > 0.05, not analyzed	p > 0.05, not analyzed	7.39638	12.09	9.66421	11.7805	8.5913	9.13051	0.00519677	0.641787	0.00809733	0.993539	0.999962
WBGene00000001	aap-1	Y110A7A.10	p > 0.05, not analyzed	p > 0.05, not analyzed	987.332	1026.88	864.55	1089.68	985.375	963.279	0.0778655	0.118198	0.658771	0.510043	0.999962
WBGene00000002	aat-1	F27C8.1	p > 0.05, not analyzed	p > 0.05, not analyzed	46.7179	46.7548	42.2072	39.6451	39.0851	32.6804	-0.28536	0.322073	-0.886012	0.375611	0.999962
WBGene00000003	aat-2	F07C3.7	p > 0.05, not analyzed	p > 0.05, not analyzed	51.6355	36.9686	40.2885	39.6452	35.6111	40.2222	-0.154107	0.327656	-0.470334	0.638117	0.999962
WBGene00000004	aat-3	F52H2.2	p > 0.05, not analyzed	p > 0.05, not analyzed	139.848	109.335	86.8092	123.053	104.948	107.442	0.00215124	0.227949	0.00943736	0.99247	0.999962
WBGene00000005	aat-4	T13A10.10	p > 0.05, not analyzed	p > 0.05, not analyzed	80.6354	83.0992	82.9499	95.8204	98.3448	87.3944	0.189376	0.228782	0.827757	0.407808	0.999962
WBGene00000006	aat-5	C55C2.5	p > 0.05, not analyzed	p > 0.05, not analyzed	36.7604	28.1189	28.504	24.0672	41.648	24.6629	-0.0335383	0.390346	-0.0859192	0.931531	0.999962
WBGene00000007	aat-6	T11F9.4	p > 0.05, not analyzed	p > 0.05, not analyzed	54.0711	52.5137	54.1015	60.3378	55.8321	50.3269	0.0489458	0.282528	0.173243	0.862461	0.999962
WBGene00000008	aat-7	F54D12.3	p > 0.05, not analyzed	p > 0.05, not analyzed	9.83262	9.77517	7.6682	10.7154	5.21717	5.87139	-0.336494	0.70814	-0.47518	0.634658	0.999962
WBGene00000009	aat-8	F28F9.4	p > 0.05, not analyzed	p > 0.05, not analyzed	6.14498	8.68677	8.62516	5.35777	12.1766	5.87275	-0.00101548	0.730556	-0.00139001	0.998891	0.999962
WBGene00000010	aat-9	Y53H1C.1	p > 0.05, not analyzed	p > 0.05, not analyzed	311.521	351.467	318.864	337.969	310.471	341.285	0.0108546	0.142815	0.0760046	0.939415	0.999962
WBGene00000016	abf-5	T22H6.5	p > 0.05, not analyzed	p > 0.05, not analyzed	20.6664	10.4255	13.9699	9.65616	5.44343	4.35184	-1.2234	0.652652	-1.8745	0.060861	0.999962
WBGene00000017	abf-6	T22H6.7	p > 0.05, not analyzed	p > 0.05, not analyzed	26.9038	18.1094	22.6953	21.4466	11.5318	14.5075	-0.520018	0.478012	-1.08788	0.27665	0.999962
WBGene00000018	abl-1	M79.1	p > 0.05, not analyzed	p > 0.05, not analyzed	362.953	399.392	328.494	348.188	397.522	403.09	0.0775161	0.144156	0.537725	0.590767	0.999962
WBGene00000019	abt-1	C24F3.5	p > 0.05, not analyzed	p > 0.05, not analyzed	10.169	6.77966	7.9582	7.2655	8.35633	8.87643	-0.0137459	0.693032	-0.0198344	0.984175	0.999962
WBGene00000020	abt-2	F12B6.1	p > 0.05, not analyzed	p > 0.05, not analyzed	121.961	123.873	95.5033	83.5451	93.0314	89.8511	-0.351843	0.222627	-1.58041	0.114012	0.999962
WBGene00000023	abt-5	Y53C10A.9	p > 0.05, not analyzed	p > 0.05, not analyzed	7.38977	8.76104	5.7841	7.49799	3.44908	11.6576	0.0508046	0.761352	0.0667295	0.946797	0.999962
WBGene00000031	abu-8	C03A7.14	p > 0.05, not analyzed	p > 0.05, not analyzed	15.9755	13.0256	1.91624	8.57255	17.4014	4.19611	-0.0131776	0.755288	-0.0174471	0.98608	0.999962
WBGene00000033	abu-10	F35A5.3	p > 0.05, not analyzed	p > 0.05, not analyzed	6.13995	11.906	3.82487	5.35849	11.344	5.88947	0.0603083	0.77137	0.0781834	0.937682	0.999962
WBGene00000034	abu-11	T01D1.6	p > 0.05, not analyzed	p > 0.05, not analyzed	7.36863	4.33104	6.69521	1.07168	9.5952	6.72866	-0.0537914	0.872168	-0.0616755	0.950821	0.999962
WBGene00000035	ace-1	W09B12.1	p > 0.05, not analyzed	p > 0.05, not analyzed	38.1446	51.2779	55.7678	41.7818	43.2782	43.4433	-0.182098	0.312225	-0.583229	0.559739	0.999962
WBGene00000036	ace-2	Y44E3A.2	p > 0.05, not analyzed	p > 0.05, not analyzed	81.0123	70.944	84.819	59.9571	75.4262	69.8347	-0.202914	0.251431	-0.807036	0.419646	0.999962
WBGene00000037	ace-3	Y48B6A.8	p > 0.05, not analyzed	p > 0.05, not analyzed	44.2862	35.9689	28.8261	19.2848	33.7901	38.4634	-0.233638	0.382037	-0.611558	0.54083	0.999962
WBGene00000040	aco-1	ZK455.1	p > 0.05, not analyzed	p > 0.05, not analyzed	1779.71	1772.5	1475.98	1563	1448.35	1474.1	-0.164376	0.112739	-1.45802	0.144836	0.999962
WBGene00000041	aco-2	F54H12.1	p > 0.05, not analyzed	p > 0.05, not analyzed	7865.34	7520.46	6414.22	7822.68	6675.96	6948.49	-0.0234847	0.110761	-0.212031	0.832083	0.999962
WBGene00000044	acr-5	K03F8.2	p > 0.05, not analyzed	p > 0.05, not analyzed	3.68994	4.35717	13.4464	6.42843	5.20175	5.0197	-0.398876	0.82964	-0.480783	0.630671	0.999962
WBGene00000047	acr-8	ZC504.2	p > 0.05, not analyzed	p > 0.05, not analyzed	11.2393	15.4651	12.3784	15.9484	17.2294	9.97408	0.13619	0.552403	0.246542	0.805263	0.999962
WBGene00000048	acr-9	C40C9.2	p > 0.05, not analyzed	p > 0.05, not analyzed	2.4596	6.53198	3.8403	4.28573	7.8072	4.18522	0.341116	0.919975	0.370789	0.710795	0.999962
WBGene00000050	acr-11	D2092.3	p > 0.05, not analyzed	p > 0.05, not analyzed	9.82992	13.0195	15.3249	5.35795	6.96391	7.55616	-0.940287	0.653939	-1.43788	0.150468	0.999962
WBGene00000051	acr-12	R01E6.4	p > 0.05, not analyzed	p > 0.05, not analyzed	15.3295	8.83712	13.2111	6.37483	12.6529	9.04965	-0.405117	0.621875	-0.651443	0.51476	0.999962
WBGene00000054	acr-15	F25G6.4	p > 0.05, not analyzed	p > 0.05, not analyzed	22.1188	7.59674	15.3278	11.7874	10.443	10.9119	-0.43656	0.584023	-0.747504	0.454759	0.999962
WBGene00000055	acr-16	F25G6.3	p > 0.05, not analyzed	p > 0.05, not analyzed	17.2142	19.5823	23.0307	20.3578	17.3617	16.7512	-0.14593	0.463017	-0.315173	0.752631	0.999962
WBGene00000056	acr-17	F53E10.2	p > 0.05, not analyzed	p > 0.05, not analyzed	3.8614	3.9295	33.1716	7.28058	2.84861	7.7251	-0.720696	0.8608	-0.837239	0.402458	0.999962
WBGene00000057	acr-18	F28F8.1	p > 0.05, not analyzed	p > 0.05, not analyzed	12.2913	7.60427	15.3383	19.2876	15.6487	22.6432	0.703001	0.532326	1.32062	0.186628	0.999962
WBGene00000058	acr-19	C31H5.3	p > 0.05, not analyzed	p > 0.05, not analyzed	3.68911	6.5299	7.6789	7.50013	7.80974	8.3728	0.39004	0.76157	0.512152	0.608545	0.999962
WBGene00000059	acr-20	R06A4.10	p > 0.05, not analyzed	p > 0.05, not analyzed	9.02611	3.12715	4.524	2.24793	5.46916	3.21036	-0.573494	0.954961	-0.600543	0.548145	0.999962
WBGene00000060	acr-21	F27B3.2	p > 0.05, not analyzed	p > 0.05, not analyzed	3.74716	2.20948	3.89841	5.44291	4.41177	6.96736	0.77513	0.956298	0.810553	0.417622	0.999962
WBGene00000063	act-1	T04C12.6	p > 0.05, not analyzed	p > 0.05, not analyzed	4627	4111.69	3784.56	3824.9	3443.54	4091.7	-0.140271	0.112057	-1.25177	0.210652	0.999962
WBGene00000064	act-2	T04C12.5	p > 0.05, not analyzed	p > 0.05, not analyzed	8726.5	9080.51	7334.13	8782.5	7606.08	8181.72	-0.0330889	0.110393	-0.299737	0.764378	0.999962
WBGene00000065	act-3	T04C12.4	p > 0.05, not analyzed	p > 0.05, not analyzed	6095.48	5564.73	4889.57	4827.91	4918.79	5086.31	-0.157615	0.105951	-1.48761	0.136853	0.999962
WBGene00000067	act-5	T25C8.2	p > 0.05, not analyzed	p > 0.05, not analyzed	2292.67	1969.96	1752.78	1830.46	1630	1728.1	-0.21279	0.119624	-1.77883	0.0752684	0.999962
WBGene00000068	acy-1	F17C8.1	p > 0.05, not analyzed	p > 0.05, not analyzed	80.0445	67.8595	71.3093	56.772	79.3744	59.9832	-0.154902	0.26374	-0.58733	0.556982	0.999962
WBGene00000069	acy-2	C10F3.3	p > 0.05, not analyzed	p > 0.05, not analyzed	4.92432	13.1181	6.73979	2.14246	2.5915	9.17394	-0.81182	0.857035	-0.947243	0.343515	0.999962
WBGene00000070	acy-3	C44F1.5	p > 0.05, not analyzed	p > 0.05, not analyzed	65.2637	59.0911	46.248	47.132	44.8733	35.8299	-0.414956	0.305318	-1.3591	0.174116	0.999962
WBGene00000071	acy-4	T01C2.1	p > 0.05, not analyzed	p > 0.05, not analyzed	113.257	84.1674	88.575	89.9838	76.8875	85.0737	-0.180571	0.235506	-0.766739	0.443237	0.999962
WBGene00000072	add-1	F39C12.2	p > 0.05, not analyzed	p > 0.05, not analyzed	55.9858	67.0119	47.6236	40.3207	61.7098	50.6534	-0.151709	0.300294	-0.505202	0.613417	0.999962
WBGene00000073	add-2	F57F5.4	p > 0.05, not analyzed	p > 0.05, not analyzed	238.149	282.889	291.836	297.675	307.869	352.799	0.236249	0.155337	1.52088	0.128289	0.999962
WBGene00000074	adm-2	C04A11.4	p > 0.05, not analyzed	p > 0.05, not analyzed	112.135	98.3487	81.8635	97.454	98.391	106.784	0.0565447	0.225026	0.25128	0.801598	0.999962
WBGene00000075	adm-4	ZK154.7	p > 0.05, not analyzed	p > 0.05, not analyzed	280.559	250.977	284.641	327.824	292.51	303.222	0.17674	0.14905	1.18577	0.235712	0.999962
WBGene00000079	adr-1	H15N14.1	p > 0.05, not analyzed	p > 0.05, not analyzed	1661.46	1743.85	1636.34	1824.16	1875.33	1409.4	0.0180148	0.123774	0.145545	0.88428	0.999962
WBGene00000080	adr-2	T20H4.4	p > 0.05, not analyzed	p > 0.05, not analyzed	1210.71	1286.28	1221.36	1300.84	1305.72	1192.48	0.030558	0.105646	0.289249	0.772391	0.999962
WBGene00000081	ads-1	Y50D7A.7	p > 0.05, not analyzed	p > 0.05, not analyzed	1036.63	945.709	946.398	903.232	795.758	841.496	-0.205338	0.114068	-1.80014	0.0718388	0.999962
WBGene00000082	adt-1	C02B4.1	p > 0.05, not analyzed	p > 0.05, not analyzed	27.5647	27.2213	43.1328	19.1711	31.218	28.9799	-0.302853	0.39691	-0.763028	0.445447	0.999962
WBGene00000083	adt-2	F08C6.1	p > 0.05, not analyzed	p > 0.05, not analyzed	376.49	154.002	325.108	164.932	279.187	276.577	-0.244036	0.442774	-0.551152	0.58153	0.999962
WBGene00000084	aex-1	D2030.10	p > 0.05, not analyzed	p > 0.05, not analyzed	124.333	116.96	82.7922	79.2798	107.128	101.751	-0.15927	0.237465	-0.670709	0.502406	0.999962
WBGene00000085	aex-2	T14B1.2	p > 0.05, not analyzed	p > 0.05, not analyzed	11.05	5.40809	5.73454	10.7173	6.98588	5.05122	0.0368227	0.75003	0.049095	0.960844	0.999962
WBGene00000086	aex-3	C02H7.3	p > 0.05, not analyzed	p > 0.05, not analyzed	67.9878	67.3015	53.966	50.5662	37.8906	46.7427	-0.485604	0.291717	-1.66464	0.095985	0.999962
WBGene00000089	aex-6	Y87G2A.4	p > 0.05, not analyzed	p > 0.05, not analyzed	20.8459	22.6034	22.8604	21.4387	23.6956	16.9106	-0.100069	0.438799	-0.228053	0.819605	0.999962
WBGene00000090	age-1	B0334.8	p > 0.05, not analyzed	p > 0.05, not analyzed	1988.64	1734.06	1315.99	1909.51	1915.95	1338.84	0.0357135	0.160292	0.222803	0.823689	0.999962
WBGene00000092	ags-3	F32A6.4	p > 0.05, not analyzed	p > 0.05, not analyzed	253.729	324.056	208.755	239.276	226.344	254.172	-0.119398	0.178485	-0.668955	0.503524	0.999962
WBGene00000093	agt-1	Y62E10A.5	p > 0.05, not analyzed	p > 0.05, not analyzed	168.922	211.05	267.203	209.582	205.883	279.839	0.10037	0.197019	0.509446	0.61044	0.999962
WBGene00000094	agt-2	F09E5.13	p > 0.05, not analyzed	p > 0.05, not analyzed	326.836	315.691	252.843	274.328	309.055	328.302	0.0308916	0.158693	0.194663	0.845657	0.999962
WBGene00000095	aha-1	C25A1.11	p > 0.05, not analyzed	p > 0.05, not analyzed	247.05	249.83	252.106	238.953	240.839	257.484	-0.0222157	0.1527	-0.145486	0.884327	0.999962
WBGene00000096	ahr-1	C41G7.5	p > 0.05, not analyzed	p > 0.05, not analyzed	9.49778	3.34567	0	3.10338	8.01418	3.43647	0.219558	1.06765	0.205646	0.837067	0.999962
WBGene00000097	aip-1	F58E10.4	p > 0.05, not analyzed	p > 0.05, not analyzed	311.625	299.831	354.834	346.208	362.581	320.725	0.0893875	0.145756	0.613267	0.5397	0.999962
WBGene00000098	air-1	K07C11.2	p > 0.05, not analyzed	p > 0.05, not analyzed	2273.54	2543.71	2420.76	2830.25	2732.24	2464.02	0.148632	0.103957	1.42975	0.15279	0.999962
WBGene00000099	air-2	B0207.4	p > 0.05, not analyzed	p > 0.05, not analyzed	1081.63	1055.43	905.949	1022.83	1036.15	1142.77	0.0749188	0.117783	0.636078	0.524726	0.999962
WBGene00000100	ajm-1	C25A11.4	p > 0.05, not analyzed	p > 0.05, not analyzed	494.299	496.508	515.746	440.835	531.153	450.922	-0.0819012	0.132425	-0.618472	0.536264	0.999962
WBGene00000101	aka-1	D1022.7	p > 0.05, not analyzed	p > 0.05, not analyzed	4650.03	4603.97	3888.97	4927.18	4555.5	4227.69	0.0610474	0.109569	0.557158	0.577419	0.999962
WBGene00000102	akt-1	C12D8.10	p > 0.05, not analyzed	p > 0.05, not analyzed	2984.08	3000.02	2648.68	3167.2	3087.75	2881.56	0.0819534	0.101719	0.805684	0.420425	0.999962
WBGene00000103	akt-2	F28H6.1	p > 0.05, not analyzed	p > 0.05, not analyzed	104.04	81.9938	95.7259	94.9983	83.5772	94.9308	-0.0424037	0.228522	-0.185556	0.852793	0.999962
WBGene00000105	alg-1	F48F7.1	p > 0.05, not analyzed	p > 0.05, not analyzed	198.066	227.893	223.645	224.817	221.121	235.267	0.0691424	0.161194	0.42894	0.667967	0.999962
WBGene00000106	alg-2	T07D3.7	p > 0.05, not analyzed	p > 0.05, not analyzed	575.19	646.266	585.498	627.98	526.397	601.954	-0.0423634	0.128096	-0.330716	0.740859	0.999962
WBGene00000107	alh-1	F54D8.3	p > 0.05, not analyzed	p > 0.05, not analyzed	2678.22	2683.08	2390.53	2668.26	2589.14	2669.66	0.0325906	0.0990787	0.328936	0.742204	0.999962
WBGene00000109	alh-3	F36H1.6	p > 0.05, not analyzed	p > 0.05, not analyzed	1378.5	1192.68	1226.84	1244.82	1198.36	1050.83	-0.120461	0.116576	-1.03332	0.301454	0.999962
WBGene00000110	alh-4	T05H4.13	p > 0.05, not analyzed	p > 0.05, not analyzed	1098.2	1172.65	962.549	1079.59	986.16	984.377	-0.0839733	0.117748	-0.713163	0.475745	0.999962
WBGene00000111	alh-5	T08B1.3	p > 0.05, not analyzed	p > 0.05, not analyzed	62.6505	49.8606	70.8309	39.6504	38.3387	55.4585	-0.455744	0.303766	-1.50031	0.133534	0.999962
WBGene00000112	alh-6	F56D12.1	p > 0.05, not analyzed	p > 0.05, not analyzed	480.703	458.405	428.787	406.68	406.123	410.333	-0.160159	0.129995	-1.23204	0.217935	0.999962
WBGene00000113	alh-7	F45H10.1	p > 0.05, not analyzed	p > 0.05, not analyzed	303.493	342.54	308.077	329.787	298.949	312.786	-0.0199405	0.144369	-0.138122	0.890144	0.999962
WBGene00000115	alh-9	F01F1.6	p > 0.05, not analyzed	p > 0.05, not analyzed	1321.5	1340.53	1467.74	1313.72	1260.09	1398.45	-0.0565379	0.107359	-0.526627	0.598453	0.999962
WBGene00000116	alh-10	C54D1.4	p > 0.05, not analyzed	p > 0.05, not analyzed	249.533	203.205	304.913	235.734	251.17	227.209	-0.0877675	0.175823	-0.499182	0.617651	0.999962
WBGene00000117	alh-11	F42G9.5	p > 0.05, not analyzed	p > 0.05, not analyzed	424.326	421.741	349.056	451.05	401.345	370.326	0.0328975	0.145657	0.225857	0.821313	0.999962
WBGene00000118	alh-12	Y69F12A.2	p > 0.05, not analyzed	p > 0.05, not analyzed	522.952	489.76	441.225	489.59	481.106	419.688	-0.0639269	0.135525	-0.471699	0.637142	0.999962
WBGene00000120	aly-1	C01F6.5	p > 0.05, not analyzed	p > 0.05, not analyzed	253.385	270.496	317.6	246.605	328.741	348.751	0.135776	0.170369	0.796952	0.425479	0.999962
WBGene00000121	aly-2	F23B2.6	p > 0.05, not analyzed	p > 0.05, not analyzed	2317.5	2535.23	2632.78	2590.37	2882.86	2827.8	0.149037	0.102661	1.45174	0.146575	0.999962
WBGene00000122	aly-3	M18.7	p > 0.05, not analyzed	p > 0.05, not analyzed	1751.25	1897.18	1965.53	1801.25	2140.81	2142.97	0.116415	0.111387	1.04514	0.295959	0.999962
WBGene00000123	ama-1	F36A4.7	p > 0.05, not analyzed	p > 0.05, not analyzed	2291.23	2389.07	1947.3	2264.32	1942.17	2380.83	-0.00844332	0.11948	-0.0706672	0.943663	0.999962
WBGene00000133	amt-1	C05E11.4	p > 0.05, not analyzed	p > 0.05, not analyzed	31.9649	32.6196	44.1257	28.9302	44.2965	63.6848	0.336714	0.361509	0.931413	0.35164	0.999962
WBGene00000135	amt-3	M195.3	p > 0.05, not analyzed	p > 0.05, not analyzed	7.38231	4.36287	8.65196	4.28537	7.79227	5.84957	-0.180314	0.79515	-0.226767	0.820605	0.999962
WBGene00000136	amt-4	C05E11.5	p > 0.05, not analyzed	p > 0.05, not analyzed	308.743	264.76	245.917	304.276	260.892	277.7	0.042037	0.15765	0.266647	0.789741	0.999962
WBGene00000137	amx-1	R13G10.2	p > 0.05, not analyzed	p > 0.05, not analyzed	355.652	304.551	293.366	329.961	349.505	341.543	0.101742	0.145512	0.699201	0.484426	0.999962
WBGene00000138	amx-2	B0019.1	p > 0.05, not analyzed	p > 0.05, not analyzed	39.3714	35.9901	39.4118	33.2117	35.5016	40.1148	-0.0734246	0.33614	-0.218435	0.827091	0.999962
WBGene00000139	amx-3	F25C8.2	p > 0.05, not analyzed	p > 0.05, not analyzed	24.1621	32.5562	28.4272	24.0739	41.6695	28.09	0.142485	0.391852	0.36362	0.716142	0.999962
WBGene00000140	anc-1	ZK973.6	p > 0.05, not analyzed	p > 0.05, not analyzed	7821.28	7145.61	6956.82	5967.35	7796.42	5486.92	-0.187433	0.128152	-1.46259	0.14358	0.999962
WBGene00000143	apc-2	K06H7.6	p > 0.05, not analyzed	p > 0.05, not analyzed	1280.75	1528.79	1261.04	1538.46	1409.9	1352.39	0.0788364	0.117108	0.673193	0.500824	0.999962
WBGene00000144	apc-10	F15H10.3	p > 0.05, not analyzed	p > 0.05, not analyzed	316.571	345.808	416.139	323.923	454.717	494.395	0.239512	0.172376	1.38947	0.164689	0.999962
WBGene00000145	apc-11	F35G12.9	p > 0.05, not analyzed	p > 0.05, not analyzed	296.482	324.735	423.254	311.152	408.049	513.455	0.238615	0.18678	1.27752	0.201418	0.999962
WBGene00000146	ape-1	F46F3.4	p > 0.05, not analyzed	p > 0.05, not analyzed	3179.6	3136.35	2739.64	3233.71	3009.14	3005.06	0.0304837	0.102967	0.296054	0.767189	0.999962
WBGene00000147	aph-1	VF36H2L.1	p > 0.05, not analyzed	p > 0.05, not analyzed	192.663	202.945	198.526	198.285	203.873	224.329	0.0774495	0.165285	0.468581	0.639369	0.999962
WBGene00000148	aph-2	ZC434.6	p > 0.05, not analyzed	p > 0.05, not analyzed	773.532	805.931	800.063	859.37	877.235	797.175	0.0899845	0.112417	0.800453	0.423448	0.999962
WBGene00000149	apl-1	C42D8.8	p > 0.05, not analyzed	p > 0.05, not analyzed	913.937	767.335	914.916	758.927	789.826	765.423	-0.165776	0.119494	-1.38732	0.165343	0.999962
WBGene00000150	apm-1	F55A12.7	p > 0.05, not analyzed	p > 0.05, not analyzed	151.179	119.483	145.703	115.726	121.725	119.936	-0.218855	0.20004	-1.09406	0.27393	0.999962
WBGene00000151	apn-1	T05H10.2	p > 0.05, not analyzed	p > 0.05, not analyzed	723.205	754.078	730.326	761.991	848.565	798.756	0.126675	0.114136	1.10986	0.267061	0.999962
WBGene00000155	app-1	W03G9.4	p > 0.05, not analyzed	p > 0.05, not analyzed	2802.02	3017.87	2743.4	3117.76	2908.13	2961.17	0.0695392	0.0972275	0.715221	0.474472	0.999962
WBGene00000156	2024-04-01	K04G2.8	p > 0.05, not analyzed	p > 0.05, not analyzed	3026.64	3031.66	2537.61	3054.93	2911.48	2884.16	0.0424262	0.106447	0.398566	0.690213	0.999962
WBGene00000157	aps-2	F02E8.3	p > 0.05, not analyzed	p > 0.05, not analyzed	126.819	118.052	155.808	161.971	169.516	170.595	0.322555	0.191856	1.68123	0.0927176	0.999962
WBGene00000158	apg-1	Y105E8A.9	p > 0.05, not analyzed	p > 0.05, not analyzed	1446.32	1467.32	1187.68	1394.78	1293.88	1281.64	-0.0463937	0.117324	-0.395431	0.692525	0.999962
WBGene00000159	aps-1	F29G9.3	p > 0.05, not analyzed	p > 0.05, not analyzed	522.569	527.354	686.496	594.176	618.548	798.77	0.211496	0.153837	1.3748	0.169192	0.999962
WBGene00000160	apb-1	Y71H2B.10	p > 0.05, not analyzed	p > 0.05, not analyzed	1146.03	1259.98	999.165	1188.02	1097.47	1071.19	-0.0205855	0.120046	-0.171479	0.863847	0.999962
WBGene00000161	apa-2	T20B5.1	p > 0.05, not analyzed	p > 0.05, not analyzed	653.684	645.991	573.799	681.307	652.27	650.583	0.0835823	0.120448	0.693929	0.487727	0.999962
WBGene00000162	apd-3	W09G10.4	p > 0.05, not analyzed	p > 0.05, not analyzed	731.464	921.474	663.897	871.937	668.718	639.05	-0.0893556	0.154399	-0.578733	0.562769	0.999962
WBGene00000163	apb-3	R11A5.1	p > 0.05, not analyzed	p > 0.05, not analyzed	1626.85	1663.56	1430.09	1803.13	1599.83	1662.9	0.101971	0.109884	0.927989	0.353413	0.999962
WBGene00000164	apm-3	F53H8.1	p > 0.05, not analyzed	p > 0.05, not analyzed	200.253	188.666	176.161	219.682	197.726	205.808	0.142024	0.167816	0.846307	0.397381	0.999962
WBGene00000165	aps-3	Y48G8AL.14	p > 0.05, not analyzed	p > 0.05, not analyzed	743.376	885.272	996.077	955.861	932.35	1195.62	0.2317	0.140722	1.6465	0.0996602	0.999962
WBGene00000166	apt-9	W04G3.4	p > 0.05, not analyzed	p > 0.05, not analyzed	12.3027	4.36116	8.64962	11.785	9.52766	4.1797	0.00427993	0.727898	0.00587985	0.995309	0.999962
WBGene00000168	apx-1	K08D9.3	p > 0.05, not analyzed	p > 0.05, not analyzed	215.319	294.171	133.368	212.56	141.148	136.498	-0.389788	0.249974	-1.55931	0.118923	0.999962
WBGene00000169	aqp-1	F32A5.5	p > 0.05, not analyzed	p > 0.05, not analyzed	154.238	123.013	119.962	145.641	115.261	107.003	-0.111032	0.212528	-0.522434	0.601368	0.999962
WBGene00000170	aqp-2	C01G6.1	p > 0.05, not analyzed	p > 0.05, not analyzed	340.213	326.629	328.404	311.105	336.094	234.256	-0.176323	0.162459	-1.08534	0.277772	0.999962
WBGene00000172	aqp-4	F40F9.9	p > 0.05, not analyzed	p > 0.05, not analyzed	58.895	52.8663	51.5207	43.9453	34.1439	33.7501	-0.55017	0.310546	-1.77162	0.0764579	0.999962
WBGene00000175	aqp-7	M02F4.8	p > 0.05, not analyzed	p > 0.05, not analyzed	640.974	532.313	578.113	495.341	536.273	574.381	-0.122595	0.130755	-0.937594	0.348453	0.999962
WBGene00000176	aqp-8	K02G10.7	p > 0.05, not analyzed	p > 0.05, not analyzed	279.134	252.491	349.696	264.331	291.206	241.429	-0.148655	0.16763	-0.886802	0.375185	0.999962
WBGene00000177	aqp-9	K07A1.16	p > 0.05, not analyzed	p > 0.05, not analyzed	22.7736	68.1645	27.4267	24.6893	23.4149	28.6099	-0.547883	0.423109	-1.2949	0.195355	0.999962
WBGene00000178	aqp-10	ZK1321.3	p > 0.05, not analyzed	p > 0.05, not analyzed	208.474	197.028	237.222	209.025	202.671	214.711	-0.0389789	0.165658	-0.235297	0.813978	0.999962
WBGene00000179	aqp-11	ZK525.2	p > 0.05, not analyzed	p > 0.05, not analyzed	205.898	194.426	240.646	236.915	231.295	213.459	0.0853676	0.16632	0.513272	0.607761	0.999962
WBGene00000180	arc-1	ZK1320.6	p > 0.05, not analyzed	p > 0.05, not analyzed	111.871	100.013	129.481	110.364	79.055	113.144	-0.178241	0.228876	-0.778769	0.436116	0.999962
WBGene00000181	ard-1	F01G4.2	p > 0.05, not analyzed	p > 0.05, not analyzed	1136.11	1335.59	1299.24	1360.99	1247.01	1410.56	0.0916946	0.113419	0.80846	0.418826	0.999962
WBGene00000182	arf-1	B0336.2	p > 0.05, not analyzed	p > 0.05, not analyzed	1128.33	1018.98	972.642	1034.71	930.891	982.762	-0.0811684	0.11407	-0.711569	0.476732	0.999962
WBGene00000183	arf-5	F57H12.1	p > 0.05, not analyzed	p > 0.05, not analyzed	2172.4	2341.22	1948.64	2135.36	2094.95	2085.82	-0.0327192	0.105628	-0.309758	0.756745	0.999962
WBGene00000184	arf-6	Y116A8C.12	p > 0.05, not analyzed	p > 0.05, not analyzed	163.688	198.392	173.5	143.708	162.135	172.163	-0.162586	0.182503	-0.890868	0.373	0.999962
WBGene00000186	ark-1	C01C7.1	p > 0.05, not analyzed	p > 0.05, not analyzed	480.749	484.584	418.707	497.017	443.207	468.266	0.0257301	0.132737	0.193843	0.846299	0.999962
WBGene00000187	arl-1	F54C9.10	p > 0.05, not analyzed	p > 0.05, not analyzed	392.404	419.821	451.524	421.268	480.883	492.899	0.142587	0.135763	1.05027	0.293595	0.999962
WBGene00000188	arl-3	F19H8.3	p > 0.05, not analyzed	p > 0.05, not analyzed	31.9555	20.6353	33.547	8.57235	24.3482	14.2598	-0.854251	0.47591	-1.79498	0.0726562	0.999962
WBGene00000189	arl-5	ZK632.8	p > 0.05, not analyzed	p > 0.05, not analyzed	134.527	160.891	241.177	189.801	225.261	252.55	0.310859	0.212272	1.46444	0.143074	0.999962
WBGene00000190	warf-1	F45E4.1	p > 0.05, not analyzed	p > 0.05, not analyzed	14.6807	18.1371	15.1464	9.65044	6.19959	18.749	-0.46334	0.576775	-0.803328	0.421785	0.999962
WBGene00000192	arl-8	Y57G11C.13	p > 0.05, not analyzed	p > 0.05, not analyzed	949.176	1047.61	939.379	964.729	952.793	964.489	-0.0268625	0.109713	-0.244843	0.806578	0.999962
WBGene00000195	arr-1	F53H8.2	p > 0.05, not analyzed	p > 0.05, not analyzed	221.203	225.792	215.587	220.743	214.023	208.115	-0.0440101	0.159394	-0.276109	0.782464	0.999962
WBGene00000196	aars-1	W02B12.6	p > 0.05, not analyzed	p > 0.05, not analyzed	564.935	494.017	474.987	543.105	547.072	506.158	0.0594087	0.129469	0.458863	0.646332	0.999962
WBGene00000197	aars-2	F28H1.3	p > 0.05, not analyzed	p > 0.05, not analyzed	3548.9	3876.17	2930.16	3878.99	3226.66	3140.1	-0.0154231	0.126365	-0.122052	0.902858	0.999962
WBGene00000198	art-1	C15F1.6	p > 0.05, not analyzed	p > 0.05, not analyzed	1230.55	1252.17	1079.76	1184.39	1012.42	1043.2	-0.137095	0.117246	-1.16929	0.242287	0.999962
WBGene00000199	arx-1	Y71F9AL.16	p > 0.05, not analyzed	p > 0.05, not analyzed	746.058	779.874	620.184	755.435	626.034	670.991	-0.0643436	0.133319	-0.482629	0.62936	0.999962
WBGene00000200	arx-2	K07C5.1	p > 0.05, not analyzed	p > 0.05, not analyzed	1378.76	1278.48	1157.28	1409.12	1196.53	1274.12	0.0246692	0.116658	0.211467	0.832523	0.999962
WBGene00000201	arx-3	Y79H2A.6	p > 0.05, not analyzed	p > 0.05, not analyzed	737.218	750.109	611.657	785.375	732.652	721.853	0.0945054	0.125459	0.753275	0.451285	0.999962
WBGene00000202	exos-4.2	Y6D11A.1	p > 0.05, not analyzed	p > 0.05, not analyzed	674.979	792.789	856.713	879.687	824.121	836.158	0.125721	0.123996	1.01392	0.310623	0.999962
WBGene00000203	arx-5	Y37D8A.1	p > 0.05, not analyzed	p > 0.05, not analyzed	456.079	490.827	487.77	542.607	517.44	560.938	0.175351	0.124749	1.40564	0.159832	0.999962
WBGene00000204	arx-6	C35D10.16	p > 0.05, not analyzed	p > 0.05, not analyzed	298.61	358.938	302.255	380.64	374.131	382.208	0.244033	0.142963	1.70696	0.0878286	0.999962
WBGene00000205	arx-7	M01B12.3	p > 0.05, not analyzed	p > 0.05, not analyzed	208.889	288.591	256.491	250.953	248.529	268.076	0.0235047	0.165426	0.142085	0.887013	0.999962
WBGene00000206	asb-1	F35G12.10	p > 0.05, not analyzed	p > 0.05, not analyzed	2836	3149.2	3089.9	3251.01	3237.58	3411.15	0.125286	0.0968175	1.29404	0.195651	0.999962
WBGene00000207	asb-2	F02E8.1	p > 0.05, not analyzed	p > 0.05, not analyzed	1178.8	1094.17	1089.67	1037.6	1059.65	1234.65	-0.0121118	0.115353	-0.104999	0.916377	0.999962
WBGene00000208	trip-4	Y53F4B.15	p > 0.05, not analyzed	p > 0.05, not analyzed	544.128	530.849	400.912	526.183	437.641	427.059	-0.0851436	0.152915	-0.556805	0.577661	0.999962
WBGene00000209	asg-1	K07A12.3	p > 0.05, not analyzed	p > 0.05, not analyzed	1141.34	1296.32	1343.45	1304.65	1344.31	1432.39	0.109583	0.111308	0.98451	0.324865	0.999962
WBGene00000210	asg-2	C53B7.4	p > 0.05, not analyzed	p > 0.05, not analyzed	484.224	519.578	557.098	491.358	506.599	566.009	0.0023201	0.129972	0.0178508	0.985758	0.999962
WBGene00000211	asm-1	B0252.2	p > 0.05, not analyzed	p > 0.05, not analyzed	95.9028	58.735	112.259	97.5042	117.215	103.038	0.250486	0.253275	0.988986	0.32267	0.999962
WBGene00000212	asm-2	ZK455.4	p > 0.05, not analyzed	p > 0.05, not analyzed	78.7062	74.0248	48.0018	61.0718	65.9314	68.6411	-0.0271625	0.276687	-0.0981707	0.921797	0.999962
WBGene00000214	asp-1	Y39B6A.20	p > 0.05, not analyzed	p > 0.05, not analyzed	10437.3	10010.2	8381.28	10789.3	7570.06	9393.13	-0.0549143	0.132201	-0.415386	0.677859	0.999962
WBGene00000215	asp-2	T18H9.2	p > 0.05, not analyzed	p > 0.05, not analyzed	5004.64	4732.31	4275.63	5043.11	4538.01	4620.8	0.0194637	0.102341	0.190185	0.849164	0.999962
WBGene00000217	asp-4	R12H7.2	p > 0.05, not analyzed	p > 0.05, not analyzed	2951.34	2901.88	2948.82	2735.79	2706.71	2636.56	-0.123757	0.0924582	-1.33852	0.180727	0.999962
WBGene00000218	asp-5	F21F8.3	p > 0.05, not analyzed	p > 0.05, not analyzed	3544.85	3338.86	2869.77	3455.21	2857.23	2854.88	-0.0894457	0.118802	-0.752898	0.451511	0.999962
WBGene00000219	asp-6	F21F8.7	p > 0.05, not analyzed	p > 0.05, not analyzed	9127.88	8247.35	6788.64	9313.01	7058.77	7611.08	-0.0108255	0.13134	-0.0824231	0.93431	0.999962
WBGene00000220	atf-2	K08F8.2	p > 0.05, not analyzed	p > 0.05, not analyzed	30.7132	28.1899	22.9766	15.0027	29.6169	15.1213	-0.443314	0.44453	-0.997263	0.318637	0.999962
WBGene00000222	atf-6	F45E6.2	p > 0.05, not analyzed	p > 0.05, not analyzed	125.501	101.443	105.751	108.205	106.488	107.793	-0.041975	0.211711	-0.198265	0.842837	0.999962
WBGene00000223	atf-7	C07G2.2	p > 0.05, not analyzed	p > 0.05, not analyzed	1140.43	1108.86	969.648	1122.3	1114.83	1107.16	0.0560515	0.111669	0.501942	0.615708	0.999962
WBGene00000224	atgp-1	F26D10.9	p > 0.05, not analyzed	p > 0.05, not analyzed	144.725	147.602	151.825	110.954	158.733	130.131	-0.149277	0.2008	-0.743412	0.457232	0.999962
WBGene00000225	atgp-2	C38C6.2	p > 0.05, not analyzed	p > 0.05, not analyzed	213.165	153.131	150.108	202.44	162.87	149.478	-0.00134786	0.201457	-0.00669058	0.994662	0.999962
WBGene00000226	atl-1	T06E4.3	p > 0.05, not analyzed	p > 0.05, not analyzed	4048.36	4105.59	3220.99	3988.69	3820.15	3579.63	0.00199426	0.115328	0.0172921	0.986204	0.999962
WBGene00000227	atm-1	Y48G1BL.2	p > 0.05, not analyzed	p > 0.05, not analyzed	725.861	770.467	643.94	621.209	633.947	571.302	-0.2284	0.12487	-1.82911	0.0673838	0.999962
WBGene00000229	atp-2	C34E10.6	p > 0.05, not analyzed	p > 0.05, not analyzed	19494.4	19179.6	15540.8	19786.2	16824.2	17916.5	0.00830956	0.113649	0.0731158	0.941714	0.999962
WBGene00000230	atp-3	F27C1.7	p > 0.05, not analyzed	p > 0.05, not analyzed	2642.76	2731.12	2145.99	2584.74	2376.1	2717.56	0.0306033	0.117416	0.26064	0.79437	0.999962
WBGene00000231	atx-2	D2045.1	p > 0.05, not analyzed	p > 0.05, not analyzed	863.382	1011.59	728.764	792.693	731.142	828.031	-0.145962	0.13594	-1.07372	0.282946	0.999962
WBGene00000232	avr-14	B0207.12	p > 0.05, not analyzed	p > 0.05, not analyzed	26.1318	26.2984	34.2204	26.7055	27.6089	19.1588	-0.243542	0.401796	-0.606133	0.544426	0.999962
WBGene00000233	avr-15	R11G10.1	p > 0.05, not analyzed	p > 0.05, not analyzed	70.5569	59.5874	98.9466	73.5536	88.8319	62.6287	-0.0344288	0.272027	-0.126564	0.899285	0.999962
WBGene00000235	baf-1	B0464.7	p > 0.05, not analyzed	p > 0.05, not analyzed	643.38	691.747	826.325	600.721	785.152	931.016	0.100501	0.158184	0.635343	0.525205	0.999962
WBGene00000236	bag-1	F57B10.11	p > 0.05, not analyzed	p > 0.05, not analyzed	573.669	639.692	671.798	661.608	742.713	798.168	0.224252	0.127438	1.7597	0.0784585	0.999962
WBGene00000237	bam-2	Y71F9AR.1	p > 0.05, not analyzed	p > 0.05, not analyzed	77.5621	42.6428	74.1485	87.8401	95.0012	85.8856	0.468642	0.268045	1.74837	0.0803998	0.999962
WBGene00000238	bar-1	C54D1.6	p > 0.05, not analyzed	p > 0.05, not analyzed	76.2964	74.2172	75.0176	77.1343	75.2753	74.3302	0.00733007	0.242808	0.0301888	0.975916	0.999962
WBGene00000239	bas-1	C05D2.4	p > 0.05, not analyzed	p > 0.05, not analyzed	133.885	117.246	114.153	109.367	114.685	117.486	-0.0928727	0.204033	-0.455184	0.648977	0.999962
WBGene00000240	pah-1	K08F8.4	p > 0.05, not analyzed	p > 0.05, not analyzed	698.282	531.772	810.442	598.439	613.402	611.178	-0.163387	0.148987	-1.09665	0.272795	0.999962
WBGene00000241	bbs-1	Y105E8A.5	p > 0.05, not analyzed	p > 0.05, not analyzed	3.6896	1.08889	3.84086	5.35711	6.07098	4.18444	0.85376	1.0163	0.840067	0.400871	0.999962
WBGene00000242	bbs-2	F20D12.3	p > 0.05, not analyzed	p > 0.05, not analyzed	1.23033	10.9051	5.76721	7.49946	11.2577	6.68634	0.493249	0.803242	0.614073	0.539167	0.999962
WBGene00000244	bbs-8	T25F10.5	p > 0.05, not analyzed	p > 0.05, not analyzed	4.9175	1.08717	7.67329	12.858	2.60604	4.1903	0.485615	0.948474	0.511996	0.608654	0.999962
WBGene00000245	bca-1	T13C5.5	p > 0.05, not analyzed	p > 0.05, not analyzed	184.056	164.023	221.376	187.57	191.696	196.563	0.0138421	0.178129	0.0777083	0.93806	0.999962
WBGene00000246	bcc-1	M7.3	p > 0.05, not analyzed	p > 0.05, not analyzed	29.5194	21.7855	39.3784	27.8565	31.211	27.6087	-0.070552	0.388524	-0.18159	0.855905	0.999962
WBGene00000247	bec-1	T19E7.3	p > 0.05, not analyzed	p > 0.05, not analyzed	531.012	643.05	655.343	569.237	638.935	631.226	0.00709252	0.130775	0.0542348	0.956748	0.999962
WBGene00000248	ben-1	C54C6.2	p > 0.05, not analyzed	p > 0.05, not analyzed	629.755	604.574	535.946	571.058	594.716	564.703	-0.031161	0.124547	-0.250194	0.802437	0.999962
WBGene00000249	bir-1	T27F2.3	p > 0.05, not analyzed	p > 0.05, not analyzed	448.896	474.583	512.86	496.763	561.443	629.809	0.233171	0.136384	1.70967	0.087327	0.999962
WBGene00000250	bir-2	C50B8.2	p > 0.05, not analyzed	p > 0.05, not analyzed	483.347	472.244	384.318	445.895	428.406	472.782	0.0101909	0.13973	0.0729332	0.941859	0.999962
WBGene00000253	bli-3	F56C11.1	p > 0.05, not analyzed	p > 0.05, not analyzed	262.059	228.151	285.073	252.221	213.8	272.303	-0.0714049	0.166823	-0.428028	0.66863	0.999962
WBGene00000254	bli-4	K04F10.4	p > 0.05, not analyzed	p > 0.05, not analyzed	2621.43	2584.49	2308.01	2810.2	2462.48	2646.84	0.0758818	0.104916	0.723262	0.469519	0.999962
WBGene00000255	bli-5	F45G2.5	p > 0.05, not analyzed	p > 0.05, not analyzed	4.89469	4.27121	3.78888	3.21672	1.76974	5.10945	-0.349391	1.01654	-0.343708	0.731066	0.999962
WBGene00000256	bli-6	Y73B6BL.34	p > 0.05, not analyzed	p > 0.05, not analyzed	18.3963	9.69299	27.6345	10.7191	9.64783	21.127	-0.423787	0.557545	-0.760094	0.447198	0.999962
WBGene00000257	bmk-1	F23B12.8	p > 0.05, not analyzed	p > 0.05, not analyzed	2337.11	2360.04	1914.71	2325.21	2291.83	2190.59	0.0425682	0.111678	0.381169	0.703078	0.999962
WBGene00000259	bpl-1	F13H8.10	p > 0.05, not analyzed	p > 0.05, not analyzed	609.554	547.199	583.195	630.581	617.835	615.07	0.0992991	0.119683	0.829686	0.406717	0.999962
WBGene00000262	bra-1	F54B11.6	p > 0.05, not analyzed	p > 0.05, not analyzed	79.6429	77.266	100.756	92.1966	70.4258	100.887	0.0277505	0.246821	0.112432	0.910481	0.999962
WBGene00000263	F23H11.5	F23H11.5	p > 0.05, not analyzed	p > 0.05, not analyzed	1134.42	1249.34	1221.99	1181.32	1255.98	1254.37	0.0337518	0.105998	0.318419	0.750167	0.999962
WBGene00000264	brc-1	C36A4.8	p > 0.05, not analyzed	p > 0.05, not analyzed	635.618	752.343	686.643	884.541	782.778	696.998	0.186695	0.130717	1.42823	0.153225	0.999962
WBGene00000265	brd-1	K04C2.4	p > 0.05, not analyzed	p > 0.05, not analyzed	666.744	684.459	525.575	634.256	611.724	603.739	-0.0195702	0.133835	-0.146227	0.883742	0.999962
WBGene00000266	bre-1	C53B4.7	p > 0.05, not analyzed	p > 0.05, not analyzed	177.573	179.825	203.359	169.894	160.967	134.826	-0.27316	0.182923	-1.49331	0.135357	0.999962
WBGene00000267	bre-2	Y39E4B.9	p > 0.05, not analyzed	p > 0.05, not analyzed	8.10524	15.2863	22.2756	25.3562	22.7623	18.6779	0.53031	0.497436	1.06609	0.286385	0.999962
WBGene00000268	bre-3	B0464.4	p > 0.05, not analyzed	p > 0.05, not analyzed	686.507	770.031	609.984	837.204	703.046	727.706	0.13378	0.131714	1.01569	0.309779	0.999962
WBGene00000269	bre-4	Y73E7A.7	p > 0.05, not analyzed	p > 0.05, not analyzed	115.209	137.725	112.38	116.671	113.339	134.955	-5.3226e-05	0.206736	-0.000257458	0.999795	0.999962
WBGene00000271	brf-1	F45E12.2	p > 0.05, not analyzed	p > 0.05, not analyzed	1312.81	1415.08	1218.54	1464.34	1421.92	1345.65	0.100786	0.108728	0.926959	0.353948	0.999962
WBGene00000273	brp-1	Y79H2A.1	p > 0.05, not analyzed	p > 0.05, not analyzed	1199.95	936.019	1229.39	886.645	1032.52	1174.51	-0.120428	0.139861	-0.861057	0.389207	0.999962
WBGene00000274	btf-1	F15D4.1	p > 0.05, not analyzed	p > 0.05, not analyzed	1023.55	1085.55	796.416	1080.77	931.014	871.627	-0.0109449	0.139063	-0.0787045	0.937268	0.999962
WBGene00000275	bub-1	R06C7.8	p > 0.05, not analyzed	p > 0.05, not analyzed	3526.63	3551.16	2911.61	3557.64	3297.08	3356.54	0.0319414	0.108815	0.293538	0.769111	0.999962
WBGene00000276	byn-1	F57B9.5	p > 0.05, not analyzed	p > 0.05, not analyzed	1080.29	1126.03	917.147	1089.77	1030.66	1041.99	0.0185022	0.117309	0.157722	0.874676	0.999962
WBGene00000277	cab-1	C23H4.1	p > 0.05, not analyzed	p > 0.05, not analyzed	441.925	344.687	429.62	373.122	416.764	360.338	-0.0798548	0.14732	-0.54205	0.587784	0.999962
WBGene00000279	cah-1	F54D8.4	p > 0.05, not analyzed	p > 0.05, not analyzed	16.5597	10.9376	14.8013	15.7787	24.7298	21.7427	0.555262	0.495527	1.12055	0.26248	0.999962
WBGene00000280	cah-2	D1022.8	p > 0.05, not analyzed	p > 0.05, not analyzed	12.2767	4.32501	6.68872	8.57394	12.2295	5.89487	0.212231	0.723898	0.293178	0.769386	0.999962
WBGene00000282	cah-4	R01E6.3	p > 0.05, not analyzed	p > 0.05, not analyzed	568.147	374.235	654.044	421.16	556.517	539.65	-0.0726227	0.181837	-0.399383	0.689611	0.999962
WBGene00000283	cah-5	R173.1	p > 0.05, not analyzed	p > 0.05, not analyzed	147.249	160.805	140.28	161.845	119.03	109.659	-0.204773	0.207287	-0.987873	0.323215	0.999962
WBGene00000284	cah-6	T28F2.3	p > 0.05, not analyzed	p > 0.05, not analyzed	7.40252	8.70852	14.0497	13.9917	19.2536	7.59572	0.418762	0.619428	0.676047	0.499011	0.999962
WBGene00000285	cal-1	C13C12.1	p > 0.05, not analyzed	p > 0.05, not analyzed	33.1431	16.0135	27.6063	29.6907	29.8197	32.3097	0.266113	0.40299	0.660347	0.509031	0.999962
WBGene00000286	cal-2	C18E9.1	p > 0.05, not analyzed	p > 0.05, not analyzed	45.281	33.1163	53.0604	47.1779	29.1875	28.091	-0.345088	0.355978	-0.969408	0.332342	0.999962
WBGene00000287	cal-3	M02B7.6	p > 0.05, not analyzed	p > 0.05, not analyzed	6.2198	7.26871	10.0579	7.47217	7.52546	6.93831	-0.106954	0.722339	-0.148066	0.882291	0.999962
WBGene00000288	cal-4	T07G12.1	p > 0.05, not analyzed	p > 0.05, not analyzed	11.2189	13.1005	40.1284	27.5268	15.8399	22.9307	0.0538613	0.516928	0.104195	0.917015	0.999962
WBGene00000289	cam-1	C01G6.8	p > 0.05, not analyzed	p > 0.05, not analyzed	1017.59	998.366	911.058	1142.69	1054.36	1111.2	0.177193	0.110127	1.60899	0.107618	0.999962
WBGene00000292	cap-1	D2024.6	p > 0.05, not analyzed	p > 0.05, not analyzed	829.662	895.349	743.776	957.109	825.571	858.14	0.0969864	0.122591	0.791138	0.428864	0.999962
WBGene00000293	cap-2	M106.5	p > 0.05, not analyzed	p > 0.05, not analyzed	1215.68	1256.49	1187.53	1265.68	1199.11	1241.12	0.0180117	0.103299	0.174364	0.861579	0.999962
WBGene00000294	cas-1	F41G4.2	p > 0.05, not analyzed	p > 0.05, not analyzed	528.281	454.502	410.019	476.282	400.852	481.363	-0.0343908	0.144985	-0.237202	0.8125	0.999962
WBGene00000295	cat-1	W01C8.6	p > 0.05, not analyzed	p > 0.05, not analyzed	6.149	7.62061	1.92014	3.2143	4.33736	7.53343	-0.0262221	0.913876	-0.0286933	0.977109	0.999962
WBGene00000298	cat-4	F32G8.6	p > 0.05, not analyzed	p > 0.05, not analyzed	415.516	400.825	395.795	396.64	456.248	336.164	-0.0276356	0.1477	-0.187106	0.851577	0.999962
WBGene00000301	cav-1	T13F2.8	p > 0.05, not analyzed	p > 0.05, not analyzed	638.147	554.681	682.392	524.834	565.795	674.885	-0.0860532	0.139414	-0.617248	0.537071	0.999962
WBGene00000302	cav-2	C56A3.7	p > 0.05, not analyzed	p > 0.05, not analyzed	19.8856	12.2739	9.50659	14.6515	12.3007	2.79041	-0.50199	0.663024	-0.757122	0.448977	0.999962
WBGene00000366	cbp-1	R10E11.1	p > 0.05, not analyzed	p > 0.05, not analyzed	3294.17	3654.85	2839.77	3424.3	3011.55	3151.56	-0.0299454	0.115239	-0.259854	0.794977	0.999962
WBGene00000367	cca-1	C54D2.5	p > 0.05, not analyzed	p > 0.05, not analyzed	137.249	103.613	131.106	94.2131	115.318	126.065	-0.143039	0.216916	-0.659422	0.509625	0.999962
WBGene00000368	ccb-1	T28F2.5	p > 0.05, not analyzed	p > 0.05, not analyzed	93.4818	88.2449	81.6469	89.9974	69.3469	68.5942	-0.212099	0.243127	-0.872378	0.383002	0.999962
WBGene00000369	ccf-1	Y56A3A.20	p > 0.05, not analyzed	p > 0.05, not analyzed	589.522	615.136	418.99	549.768	484.891	521.375	-0.0598366	0.153704	-0.389298	0.697056	0.999962
WBGene00000370	ccg-1	Y73F8A.6	p > 0.05, not analyzed	p > 0.05, not analyzed	395.067	284.773	358.686	275.464	315.241	302.118	-0.215563	0.158985	-1.35587	0.17514	0.999962
WBGene00000371	cox-5B	F26E4.9	p > 0.05, not analyzed	p > 0.05, not analyzed	1901.19	2137.66	2087.17	1999.75	2169.25	1983.85	0.0059765	0.103083	0.0579778	0.953766	0.999962
WBGene00000372	cyp-13A7	T10B9.10	p > 0.05, not analyzed	p > 0.05, not analyzed	4.91661	6.51836	6.71081	8.57224	3.47725	2.51577	-0.352931	0.877431	-0.402232	0.687513	0.999962
WBGene00000373	cyp-14A5	F08F3.7	p > 0.05, not analyzed	p > 0.05, not analyzed	88.4875	65.1502	87.2094	75.0087	93.0652	56.211	-0.103544	0.267818	-0.386622	0.699036	0.999962
WBGene00000374	cyp-31A1	C01F6.3	p > 0.05, not analyzed	p > 0.05, not analyzed	46.6816	61.7879	55.5187	66.4411	62.7317	59.6564	0.198284	0.27663	0.716782	0.473509	0.999962
WBGene00000375	cyp-44A1	ZK177.5	p > 0.05, not analyzed	p > 0.05, not analyzed	498.96	551.557	505.976	596.857	543.653	508.455	0.081642	0.128504	0.635326	0.525216	0.999962
WBGene00000376	ccr-4	ZC518.3	p > 0.05, not analyzed	p > 0.05, not analyzed	2631.02	2591.6	2133.49	2617.64	2536.16	2469.46	0.0518916	0.110579	0.469274	0.638874	0.999962
WBGene00000377	cct-1	T05C12.7	p > 0.05, not analyzed	p > 0.05, not analyzed	4814.16	5121.08	4253.81	5277.97	4708.04	4824.01	0.0618117	0.105763	0.584437	0.558926	0.999962
WBGene00000378	cct-2	T21B10.7	p > 0.05, not analyzed	p > 0.05, not analyzed	2609.58	2943.46	2538.27	2933.59	2293.81	2083.58	-0.146998	0.130925	-1.12276	0.261538	0.999962
WBGene00000379	cct-4	K01C8.10	p > 0.05, not analyzed	p > 0.05, not analyzed	4368.93	4651.69	3896.54	4727.26	4248.44	4398.95	0.0502417	0.104349	0.481479	0.630176	0.999962
WBGene00000380	cct-5	C07G2.3	p > 0.05, not analyzed	p > 0.05, not analyzed	4614.14	4963.96	4528.46	4943.6	4511.15	4664.29	0.00114652	0.0957067	0.0119795	0.990442	0.999962
WBGene00000381	cct-6	F01F1.8	p > 0.05, not analyzed	p > 0.05, not analyzed	4660.08	4876.61	3775.87	4888.34	4204.09	4459.41	0.0258023	0.117484	0.219625	0.826163	0.999962
WBGene00000382	cdc-6	C43E11.10	p > 0.05, not analyzed	p > 0.05, not analyzed	1047.49	1151.59	1112.81	1254.71	1273.18	1133.66	0.144027	0.109661	1.31338	0.189056	0.999962
WBGene00000383	cdc-14	C17G10.4	p > 0.05, not analyzed	p > 0.05, not analyzed	1973.63	1896.01	1649.68	2092.46	1763.2	1849.05	0.047734	0.115069	0.414828	0.678268	0.999962
WBGene00000386	cdc-25.1	K06A5.7	p > 0.05, not analyzed	p > 0.05, not analyzed	2673.33	2821.51	2146.94	2954.82	2497.26	2550.58	0.0666525	0.123842	0.538206	0.590435	0.999962
WBGene00000387	cdc-25.2	F16B4.8	p > 0.05, not analyzed	p > 0.05, not analyzed	333.684	340.99	335.982	362.774	348.65	386.809	0.119741	0.137654	0.869871	0.384371	0.999962
WBGene00000388	cdc-25.3	ZK637.11	p > 0.05, not analyzed	p > 0.05, not analyzed	684.862	672.946	721.879	769.542	794.86	767.857	0.164955	0.113434	1.45419	0.145893	0.999962
WBGene00000390	cdc-42	R07G3.1	p > 0.05, not analyzed	p > 0.05, not analyzed	1333.94	1307.73	1132.95	1311.7	1223.89	1215.51	-0.00857374	0.112044	-0.0765208	0.939005	0.999962
WBGene00000391	cdd-1	C47D2.2	p > 0.05, not analyzed	p > 0.05, not analyzed	26.9635	42.971	43.7566	36.4484	24.6222	26.2567	-0.396763	0.372923	-1.06393	0.287361	0.999962
WBGene00000392	cdd-2	F49E8.4	p > 0.05, not analyzed	p > 0.05, not analyzed	164.896	238.636	229.085	240.231	248.624	262.168	0.243884	0.175419	1.39029	0.164439	0.999962
WBGene00000393	cdf-1	C15B12.7	p > 0.05, not analyzed	p > 0.05, not analyzed	300.184	259.823	263.463	291.945	264.122	272.006	0.00870321	0.151736	0.0573577	0.95426	0.999962
WBGene00000395	cdh-3	ZK112.7	p > 0.05, not analyzed	p > 0.05, not analyzed	283.41	306.129	289.589	321.313	325.305	217.795	-0.0269915	0.173689	-0.155401	0.876505	0.999962
WBGene00000396	cdh-4	F25F2.2	p > 0.05, not analyzed	p > 0.05, not analyzed	4049.47	4083.37	3654.67	3812.84	4145.52	4078.46	0.0306206	0.0981275	0.312049	0.755003	0.999962
WBGene00000397	cdh-5	F08B4.2	p > 0.05, not analyzed	p > 0.05, not analyzed	85.2227	53.8981	57.7185	50.1533	55.8056	48.3666	-0.343672	0.28987	-1.18561	0.235777	0.999962
WBGene00000401	cdh-9	F59C12.1	p > 0.05, not analyzed	p > 0.05, not analyzed	14.762	14.1692	18.2562	14.9993	24.2602	10.0341	0.059389	0.528858	0.112297	0.910588	0.999962
WBGene00000402	cdh-10	C45G7.5	p > 0.05, not analyzed	p > 0.05, not analyzed	4.92696	4.38211	6.74981	4.28449	2.58586	4.99451	-0.445212	0.921611	-0.48308	0.629039	0.999962
WBGene00000403	casy-1	B0034.3	p > 0.05, not analyzed	p > 0.05, not analyzed	324.796	252.97	318.701	344.969	330.972	365.666	0.217533	0.152619	1.42533	0.154061	0.999962
WBGene00000405	cdk-1	T05G5.3	p > 0.05, not analyzed	p > 0.05, not analyzed	2403.64	2636.63	2689.43	2760.83	2947.94	3073.48	0.184079	0.101125	1.82031	0.0687118	0.999962
WBGene00000406	cdk-4	F18H3.5	p > 0.05, not analyzed	p > 0.05, not analyzed	144.883	165.515	190.217	192.91	208.668	236.531	0.348001	0.181235	1.92017	0.0548362	0.999962
WBGene00000407	cdk-5	T27E9.3	p > 0.05, not analyzed	p > 0.05, not analyzed	461.298	548.947	395.838	457.681	499.227	475.197	0.0281401	0.145482	0.193427	0.846625	0.999962
WBGene00000408	cdk-7	Y39G10AL.3	p > 0.05, not analyzed	p > 0.05, not analyzed	830.192	889.543	921.605	943.786	1044.3	1072.28	0.212456	0.113912	1.86509	0.0621688	0.999962
WBGene00000409	cdk-8	F39H11.3	p > 0.05, not analyzed	p > 0.05, not analyzed	1177.02	1087.94	1140.84	1196.77	1286.88	1329.66	0.16389	0.107101	1.53024	0.125957	0.999962
WBGene00000410	cdk-9	H25P06.2	p > 0.05, not analyzed	p > 0.05, not analyzed	451.082	454.043	331.67	430.758	379.949	392.513	-0.0381747	0.153541	-0.248629	0.803648	0.999962
WBGene00000411	cdl-1	R06F6.1	p > 0.05, not analyzed	p > 0.05, not analyzed	2055.05	2179.99	1866.32	2043.42	2005.88	1944.17	-0.0255401	0.10385	-0.245932	0.805735	0.999962
WBGene00000412	cdr-1	F35E8.11	p > 0.05, not analyzed	p > 0.05, not analyzed	8.58219	3.22702	6.66466	5.3598	7.90369	5.07605	-0.000281647	0.816793	-0.00034482	0.999725	0.999962
WBGene00000413	cdt-1	Y54E10A.15	p > 0.05, not analyzed	p > 0.05, not analyzed	707.617	689.897	537.687	660.993	640.165	601.235	-0.0232951	0.135728	-0.171631	0.863727	0.999962
WBGene00000414	cec-1	ZK1236.2	p > 0.05, not analyzed	p > 0.05, not analyzed	213.649	232.617	258.107	213.271	190.307	261.753	-0.0832929	0.175479	-0.474659	0.63503	0.999962
WBGene00000415	ced-1	Y47H9C.4	p > 0.05, not analyzed	p > 0.05, not analyzed	1470.13	1452.65	1196.63	1535.5	1310.65	1311.44	0.0133963	0.122141	0.109679	0.912664	0.999962
WBGene00000416	ced-2	Y41D4B.13	p > 0.05, not analyzed	p > 0.05, not analyzed	847.311	1178.28	562.889	787.211	562.303	811.525	-0.25931	0.335883	-0.772026	0.440099	0.999962
WBGene00000417	ced-3	C48D1.2	p > 0.05, not analyzed	p > 0.05, not analyzed	1361.36	1472.63	1087.35	1403.32	1189	1170.81	-0.059278	0.13309	-0.445398	0.656032	0.999962
WBGene00000418	ced-4	C35D10.9	p > 0.05, not analyzed	p > 0.05, not analyzed	631.423	719.499	631.916	693.218	697.332	679.328	0.061862	0.119316	0.518472	0.604129	0.999962
WBGene00000419	ced-5	C02F4.1	p > 0.05, not analyzed	p > 0.05, not analyzed	2599.06	2617.59	2115.79	2559.97	2314.87	2175.67	-0.0564778	0.117516	-0.480598	0.630802	0.999962
WBGene00000420	ced-6	F56D2.7	p > 0.05, not analyzed	p > 0.05, not analyzed	545.813	555.425	454.575	572.185	501.338	552.386	0.0644948	0.134219	0.480517	0.63086	0.999962
WBGene00000421	ced-7	C48B4.4	p > 0.05, not analyzed	p > 0.05, not analyzed	3940.77	3678.84	3099.41	4024.66	3674.83	3590.65	0.0751283	0.113305	0.663065	0.507289	0.999962
WBGene00000422	ced-8	F08F1.5	p > 0.05, not analyzed	p > 0.05, not analyzed	84.8042	93.3979	94.8874	85.7236	92.1794	86.4009	-0.0485676	0.226829	-0.214115	0.830457	0.999962
WBGene00000423	ced-9	T07C4.8	p > 0.05, not analyzed	p > 0.05, not analyzed	783.504	811.963	709.627	858.421	743.293	741.922	0.0234278	0.121992	0.192044	0.847708	0.999962
WBGene00000424	ced-10	C09G12.8	p > 0.05, not analyzed	p > 0.05, not analyzed	362.627	418.385	407.525	384.674	402.371	433.438	0.0380464	0.136929	0.277855	0.781124	0.999962
WBGene00000425	ced-11	ZK512.3	p > 0.05, not analyzed	p > 0.05, not analyzed	49.2598	33.9343	43.3678	42.8465	44.8577	44.1491	0.062624	0.319429	0.19605	0.844571	0.999962
WBGene00000426	ced-12	Y106G6E.5	p > 0.05, not analyzed	p > 0.05, not analyzed	1045.51	1132.85	972.992	1199.99	1077.32	1111.03	0.104427	0.113317	0.921543	0.356767	0.999962
WBGene00000430	ceh-5	C16C2.1	p > 0.05, not analyzed	p > 0.05, not analyzed	8.54377	4.23043	6.58601	7.50791	8.04368	5.15368	0.100809	0.777063	0.12973	0.89678	0.999962
WBGene00000431	ceh-6	K02B12.1	p > 0.05, not analyzed	p > 0.05, not analyzed	18.443	9.78948	12.4735	16.0721	8.68233	8.37685	-0.305384	0.595483	-0.512834	0.608067	0.999962
WBGene00000435	ceh-10	W03A3.1	p > 0.05, not analyzed	p > 0.05, not analyzed	9.81831	2.15991	8.59262	6.43076	6.99688	8.43021	0.0961091	0.782545	0.122816	0.902253	0.999962
WBGene00000437	ceh-13	R13A5.5	p > 0.05, not analyzed	p > 0.05, not analyzed	13.4836	31.1707	38.0635	23.5838	35.1551	32.1701	0.125909	0.422966	0.297682	0.765946	0.999962
WBGene00000441	ceh-18	ZC64.3	p > 0.05, not analyzed	p > 0.05, not analyzed	65.2184	52.3798	63.469	52.4946	62.3074	55.9647	-0.0816187	0.276649	-0.295027	0.767974	0.999962
WBGene00000442	ceh-19	F20D12.6	p > 0.05, not analyzed	p > 0.05, not analyzed	12.8843	6.11568	1.322	6.30325	3.23838	5.07918	-0.410875	0.921333	-0.445957	0.655628	0.999962
WBGene00000443	ceh-20	F31E3.1	p > 0.05, not analyzed	p > 0.05, not analyzed	112.979	98.5102	110.933	109.312	115.168	106.838	0.0397969	0.209902	0.189597	0.849625	0.999962
WBGene00000444	ceh-21	T26C11.6	p > 0.05, not analyzed	p > 0.05, not analyzed	215.352	212.825	206.777	212.12	219.773	252.225	0.110177	0.163388	0.674329	0.500102	0.999962
WBGene00000445	ceh-22	F29F11.5	p > 0.05, not analyzed	p > 0.05, not analyzed	10.2836	3.31362	3.8057	3.77884	1.7062	0.669758	-1.65565	1.13165	-1.46304	0.143457	0.999962
WBGene00000448	pros-1	K12H4.1	p > 0.05, not analyzed	p > 0.05, not analyzed	40.5986	15.2638	27.8707	14.9991	29.4496	15.0471	-0.480281	0.474473	-1.01224	0.311423	0.999962
WBGene00000449	ceh-27	F46F3.1	p > 0.05, not analyzed	p > 0.05, not analyzed	17.7193	2.4584	15.1087	7.21943	6.50417	4.36131	-0.9746	0.751443	-1.29697	0.194641	0.999962
WBGene00000451	ceh-30	C33D12.7	p > 0.05, not analyzed	p > 0.05, not analyzed	4.33989	4.56619	7.07651	2.84407	2.80578	6.30541	-0.419193	0.931808	-0.449871	0.652804	0.999962
WBGene00000453	ceh-32	W05E10.3	p > 0.05, not analyzed	p > 0.05, not analyzed	31.9712	23.9396	29.7529	19.2862	41.6578	36.8448	0.203831	0.39873	0.5112	0.609211	0.999962
WBGene00000455	ceh-34	C10G8.6	p > 0.05, not analyzed	p > 0.05, not analyzed	9.81751	9.71657	10.4998	6.43084	9.6238	5.90279	-0.450051	0.679746	-0.662088	0.507915	0.999962
WBGene00000457	ceh-36	C37E2.4	p > 0.05, not analyzed	p > 0.05, not analyzed	9.82006	3.24213	10.5072	6.43059	1.74797	5.8975	-0.756346	0.853102	-0.886583	0.375303	0.999962
WBGene00000458	ceh-37	C37E2.5	p > 0.05, not analyzed	p > 0.05, not analyzed	48.7392	31.5992	30.0377	12.4161	39.7389	21.0341	-0.573106	0.435101	-1.31718	0.187779	0.999962
WBGene00000459	ceh-38	F22D3.1	p > 0.05, not analyzed	p > 0.05, not analyzed	1236.79	1235.92	1131.13	1285.6	1317.99	1274.11	0.106294	0.104748	1.01476	0.31022	0.999962
WBGene00000460	ceh-39	T26C11.7	p > 0.05, not analyzed	p > 0.05, not analyzed	256.988	258.94	238.955	300.009	271.69	288.94	0.189294	0.150355	1.25898	0.208036	0.999962
WBGene00000461	ceh-40	F17A2.5	p > 0.05, not analyzed	p > 0.05, not analyzed	73.6548	95.1243	130.883	78.2381	86.5043	95.183	-0.210671	0.25161	-0.83729	0.402429	0.999962
WBGene00000462	ceh-41	T26C11.5	p > 0.05, not analyzed	p > 0.05, not analyzed	76.1641	71.5415	101.463	98.5901	88.8729	105.872	0.230103	0.238992	0.962807	0.335644	0.999962
WBGene00000463	ceh-43	C28A5.4	p > 0.05, not analyzed	p > 0.05, not analyzed	71.2591	51.7354	85.9945	49.1519	66.602	58.2379	-0.263477	0.284966	-0.92459	0.355179	0.999962
WBGene00000464	ceh-44	Y54F10AM.4	p > 0.05, not analyzed	p > 0.05, not analyzed	1267.39	1256.67	1186.49	1347.99	1209.27	1199.77	0.0175562	0.107867	0.162758	0.870709	0.999962
WBGene00000465	cpg-1	C07G2.1	p > 0.05, not analyzed	p > 0.05, not analyzed	31178	31285.3	23389.8	33212	27921.8	29238.5	0.0740356	0.124293	0.595656	0.551405	0.999962
WBGene00000466	cel-1	C03D6.3	p > 0.05, not analyzed	p > 0.05, not analyzed	1188.39	1210.3	975.078	1195.22	1178.11	1114.28	0.0486343	0.118844	0.409228	0.682373	0.999962
WBGene00000467	cep-1	F52B5.5	p > 0.05, not analyzed	p > 0.05, not analyzed	982.995	1223.67	1168.61	1176.32	1203.31	1496.18	0.199192	0.131284	1.51726	0.129201	0.999962
WBGene00000468	ces-1	F43G9.11	p > 0.05, not analyzed	p > 0.05, not analyzed	6.13187	3.23052	5.71689	2.14383	0	3.38076	-1.44748	1.16741	-1.23991	0.21501	0.999962
WBGene00000469	ces-2	ZK909.4	p > 0.05, not analyzed	p > 0.05, not analyzed	19.6239	21.5451	20.0145	20.3661	21.0446	14.3633	-0.138415	0.460328	-0.300689	0.763652	0.999962
WBGene00000472	cey-1	F33A8.3	p > 0.05, not analyzed	p > 0.05, not analyzed	791.112	635.166	510.166	655.84	536.754	565.52	-0.138065	0.157868	-0.874555	0.381816	0.999962
WBGene00000473	cey-2	F46F11.2	p > 0.05, not analyzed	p > 0.05, not analyzed	17453.6	19161.3	15754.6	18854.6	17840.2	17778.2	0.0568333	0.101129	0.561987	0.574125	0.999962
WBGene00000474	cey-3	M01E11.5	p > 0.05, not analyzed	p > 0.05, not analyzed	7222.11	8002.01	7953.15	8401.67	8179.08	9921.68	0.193403	0.106621	1.81392	0.0696896	0.999962
WBGene00000475	cey-4	Y39A1C.3	p > 0.05, not analyzed	p > 0.05, not analyzed	4904.23	5164.98	4325.93	4771.44	4233.33	4731.22	-0.0675222	0.106028	-0.636832	0.524234	0.999962
WBGene00000476	cfi-1	T23D8.8	p > 0.05, not analyzed	p > 0.05, not analyzed	27.0646	26.1622	30.7503	16.0705	30.3209	24.2462	-0.241533	0.413919	-0.583527	0.559539	0.999962
WBGene00000477	cft-1	C18C4.2	p > 0.05, not analyzed	p > 0.05, not analyzed	35.7087	26.2578	39.4984	17.139	33.6613	16.6678	-0.583988	0.419234	-1.39299	0.163624	0.999962
WBGene00000478	cfz-2	F27E11.3	p > 0.05, not analyzed	p > 0.05, not analyzed	45.5102	31.5918	40.3414	31.0706	22.5392	33.4625	-0.430861	0.36346	-1.18545	0.235841	0.999962
WBGene00000479	cgh-1	C07H6.5	p > 0.05, not analyzed	p > 0.05, not analyzed	7012.49	7015.94	5146.48	6774.22	5949.66	6466.06	0.00130729	0.125796	0.0103922	0.991708	0.999962
WBGene00000480	cgp-1	Y38C9A.2	p > 0.05, not analyzed	p > 0.05, not analyzed	793.338	775.995	711.795	864.315	813.376	773.032	0.103831	0.116483	0.891388	0.372721	0.999962
WBGene00000481	cha-1	ZC416.8	p > 0.05, not analyzed	p > 0.05, not analyzed	19.68	9.80427	15.368	11.7854	7.80211	9.20226	-0.643262	0.5895	-1.0912	0.275186	0.999962
WBGene00000482	chd-3	T14G8.1	p > 0.05, not analyzed	p > 0.05, not analyzed	758.77	788.855	762.779	743.356	801.539	731.634	-0.021139	0.1137	-0.185918	0.852509	0.999962
WBGene00000484	che-2	F38G1.1	p > 0.05, not analyzed	p > 0.05, not analyzed	9.84284	9.81546	5.76757	3.21404	5.19538	4.17863	-0.995462	0.808385	-1.23142	0.218166	0.999962
WBGene00000485	che-3	F18C12.1	p > 0.05, not analyzed	p > 0.05, not analyzed	80.1003	80.1235	95.5852	85.6821	88.6131	68.9769	-0.0780136	0.241945	-0.322443	0.747117	0.999962
WBGene00000488	che-7	F26D11.10	p > 0.05, not analyzed	p > 0.05, not analyzed	8.29248	9.64372	5.66907	5.17873	7.67818	5.66152	-0.337449	0.755113	-0.446885	0.654958	0.999962
WBGene00000490	che-11	C27A7.4	p > 0.05, not analyzed	p > 0.05, not analyzed	13.5465	13.136	17.3473	10.7116	15.5275	8.32992	-0.35301	0.565143	-0.624639	0.532208	0.999962
WBGene00000491	che-12	B0024.8	p > 0.05, not analyzed	p > 0.05, not analyzed	17.5511	13.9528	19.1427	17.4861	20.9321	8.6554	-0.140387	0.527567	-0.266102	0.790161	0.999962
WBGene00000492	che-13	F59C6.7	p > 0.05, not analyzed	p > 0.05, not analyzed	4.07681	5.47898	7.14833	1.3639	2.16781	6.4055	-0.729263	0.982923	-0.741933	0.458128	0.999962
WBGene00000493	che-14	F56H1.1	p > 0.05, not analyzed	p > 0.05, not analyzed	17.2329	12.0186	8.6623	11.7838	20.743	16.6876	0.399633	0.549589	0.727149	0.467135	0.999962
WBGene00000496	chs-1	T25G3.2	p > 0.05, not analyzed	p > 0.05, not analyzed	9946.95	10119.6	7743.98	10144.4	9027.6	8680.2	0.00221049	0.119799	0.0184517	0.985279	0.999962
WBGene00000497	chs-2	F48A11.1	p > 0.05, not analyzed	p > 0.05, not analyzed	101.34	111.004	96.0017	94.4766	102.493	72.0681	-0.198709	0.232095	-0.856156	0.391912	0.999962
WBGene00000498	chk-1	Y39H10A.7	p > 0.05, not analyzed	p > 0.05, not analyzed	939.014	1149.02	829.828	1085.99	891.02	992.98	0.0255887	0.137829	0.185655	0.852715	0.999962
WBGene00000499	chk-2	Y60A3A.12	p > 0.05, not analyzed	p > 0.05, not analyzed	209.191	195.331	190.406	214.264	221.539	213.002	0.126801	0.163	0.777918	0.436617	0.999962
WBGene00000500	chn-1	T09B4.10	p > 0.05, not analyzed	p > 0.05, not analyzed	868.944	988.267	1161.05	1001.05	1152.61	1360.5	0.219145	0.14185	1.54491	0.122369	0.999962
WBGene00000501	cho-1	C48D1.3	p > 0.05, not analyzed	p > 0.05, not analyzed	12.2984	5.44398	14.4023	6.42856	11.2757	4.18477	-0.555937	0.70982	-0.783207	0.433505	0.999962
WBGene00000502	chp-1	Y110A7A.13	p > 0.05, not analyzed	p > 0.05, not analyzed	613.818	641.121	678.383	673.057	681.425	684.704	0.0760554	0.116739	0.651498	0.514725	0.999962
WBGene00000503	cht-1	C04F6.3	p > 0.05, not analyzed	p > 0.05, not analyzed	428.024	307.154	494.607	327.851	351.149	423.36	-0.157348	0.17608	-0.893616	0.371528	0.999962
WBGene00000506	cic-1	H14E04.5	p > 0.05, not analyzed	p > 0.05, not analyzed	284.536	283.278	250.633	285.127	299.053	282.232	0.0841329	0.149175	0.563989	0.572762	0.999962
WBGene00000507	cit-1.1	F44B9.4	p > 0.05, not analyzed	p > 0.05, not analyzed	396.013	374.563	333.185	424.284	355.601	343.974	0.0254842	0.147466	0.172814	0.862797	0.999962
WBGene00000508	cit-1.2	F44B9.3	p > 0.05, not analyzed	p > 0.05, not analyzed	262.941	303.683	234.196	229.168	183.356	257.076	-0.257727	0.177263	-1.45392	0.145968	0.999962
WBGene00000509	cka-1	C28D4.2	p > 0.05, not analyzed	p > 0.05, not analyzed	671.671	736.139	641.935	765.474	691.563	602.87	0.00591731	0.130515	0.0453383	0.963838	0.999962
WBGene00000511	ckb-1	B0285.8	p > 0.05, not analyzed	p > 0.05, not analyzed	28.2523	32.5091	31.5809	40.7225	27.0187	26.8953	0.0236388	0.375588	0.0629381	0.949816	0.999962
WBGene00000512	ckb-2	B0285.9	p > 0.05, not analyzed	p > 0.05, not analyzed	255.355	285.45	327.747	267.936	232.361	248.427	-0.218751	0.159659	-1.37011	0.170653	0.999962
WBGene00000514	ckb-4	F22F7.5	p > 0.05, not analyzed	p > 0.05, not analyzed	84.7312	103.293	75.8344	74.0956	100.646	68.4727	-0.113489	0.253129	-0.448344	0.653905	0.999962
WBGene00000515	ckc-1	T27A10.3	p > 0.05, not analyzed	p > 0.05, not analyzed	133.703	142.997	190.574	188.871	165.566	110.429	-0.0158211	0.225255	-0.0702365	0.944005	0.999962
WBGene00000516	cki-1	T05A6.1	p > 0.05, not analyzed	p > 0.05, not analyzed	13.4701	9.63667	11.3885	9.64925	14.1177	19.5381	0.343451	0.572759	0.599644	0.548744	0.999962
WBGene00000517	cki-2	T05A6.2	p > 0.05, not analyzed	p > 0.05, not analyzed	301.082	272.732	256.119	271.548	264.591	299.665	0.0134468	0.152746	0.088034	0.92985	0.999962
WBGene00000518	ckk-1	C05H8.1	p > 0.05, not analyzed	p > 0.05, not analyzed	24.5145	55.3261	35.4026	35.2416	35.455	29.2044	-0.211968	0.373845	-0.566994	0.570718	0.999962
WBGene00000519	cku-70	Y47D3A.4	p > 0.05, not analyzed	p > 0.05, not analyzed	800.764	801.903	663.783	857.115	714.207	744.438	0.0310908	0.129622	0.239857	0.810441	0.999962
WBGene00000520	cku-80	R07E5.8	p > 0.05, not analyzed	p > 0.05, not analyzed	959.111	972.294	895.69	1082.13	1021.23	871.94	0.0728696	0.120401	0.605225	0.54503	0.999962
WBGene00000522	clc-1	C09F12.1	p > 0.05, not analyzed	p > 0.05, not analyzed	81.8814	69.3123	97.9413	109.95	68.4645	79.0435	0.0382393	0.259676	0.147258	0.882928	0.999962
WBGene00000523	clc-2	C01C10.1	p > 0.05, not analyzed	p > 0.05, not analyzed	22.2197	12.3685	29.3388	28.0246	43.1581	23.3229	0.564866	0.442599	1.27625	0.201868	0.999962
WBGene00000524	clc-3	ZK563.4	p > 0.05, not analyzed	p > 0.05, not analyzed	13.4718	14.9975	23.7339	18.2261	25.5759	21.2281	0.308393	0.471911	0.653498	0.513435	0.999962
WBGene00000526	clc-5	C01C10.4	p > 0.05, not analyzed	p > 0.05, not analyzed	20.8709	12.9764	24.8457	35.3673	31.4438	22.7351	0.59937	0.433501	1.38263	0.166779	0.999962
WBGene00000527	cle-1	C36B1.1	p > 0.05, not analyzed	p > 0.05, not analyzed	342.048	344.889	285.388	308.094	314.22	320.339	-0.0419191	0.147098	-0.284974	0.775664	0.999962
WBGene00000528	clh-1	T27D12.2	p > 0.05, not analyzed	p > 0.05, not analyzed	143.997	123.508	147.239	97.4922	112.379	146.8	-0.212649	0.214786	-0.990049	0.32215	0.999962
WBGene00000529	clh-2	B0491.8	p > 0.05, not analyzed	p > 0.05, not analyzed	12.3083	14.1999	19.2459	13.9265	6.91627	10.8496	-0.549748	0.575308	-0.955571	0.339289	0.999962
WBGene00000530	clh-3	E04F6.11	p > 0.05, not analyzed	p > 0.05, not analyzed	344.088	328.9	275.956	363.72	346.074	297.306	0.0865924	0.154231	0.561446	0.574494	0.999962
WBGene00000531	clh-4	T06F4.2	p > 0.05, not analyzed	p > 0.05, not analyzed	16.004	12.0247	11.5538	13.926	15.5492	10.8421	0.0315408	0.553423	0.0569922	0.954551	0.999962
WBGene00000532	clh-5	C07H4.2	p > 0.05, not analyzed	p > 0.05, not analyzed	1041.15	982.547	808.992	995.235	869.325	878.394	-0.045893	0.127998	-0.358546	0.719935	0.999962
WBGene00000533	clh-6	R07B7.1	p > 0.05, not analyzed	p > 0.05, not analyzed	660.857	653.89	550.201	746.697	621.118	600.387	0.0773895	0.13636	0.56754	0.570348	0.999962
WBGene00000534	cpi-2	R01B10.1	p > 0.05, not analyzed	p > 0.05, not analyzed	903.672	858.311	946.688	984.615	937.304	1075.77	0.146214	0.114075	1.28173	0.199937	0.999962
WBGene00000535	cpi-1	K08B4.6	p > 0.05, not analyzed	p > 0.05, not analyzed	280.397	212.734	387.418	307.856	321.381	363.872	0.171696	0.191558	0.896317	0.370084	0.999962
WBGene00000536	clk-1	ZC395.2	p > 0.05, not analyzed	p > 0.05, not analyzed	226.358	249.779	334.287	262.702	257.589	300.699	0.015252	0.174514	0.0873972	0.930356	0.999962
WBGene00000537	clk-2	C07H6.6	p > 0.05, not analyzed	p > 0.05, not analyzed	1001.84	1121.54	945.788	1238.4	1053.24	1031.75	0.114042	0.122025	0.934572	0.350009	0.999962
WBGene00000539	cln-3.1	F07B10.1	p > 0.05, not analyzed	p > 0.05, not analyzed	58.7159	69.8054	83.9992	91.7796	68.6736	79.0366	0.161624	0.258588	0.625026	0.531954	0.999962
WBGene00000540	cln-3.2	C01G8.2	p > 0.05, not analyzed	p > 0.05, not analyzed	146.19	176.704	136.889	170.389	169.015	138.63	0.054981	0.193572	0.284034	0.776384	0.999962
WBGene00000541	cln-3.3	ZC190.1	p > 0.05, not analyzed	p > 0.05, not analyzed	23.3398	10.8381	13.3995	16.0746	9.58568	13.4457	-0.278273	0.553285	-0.502947	0.615002	0.999962
WBGene00000542	clp-1	C06G4.2	p > 0.05, not analyzed	p > 0.05, not analyzed	645.318	594.084	464.219	568.254	566.658	490.985	-0.065808	0.146062	-0.450547	0.652316	0.999962
WBGene00000543	clp-2	T04A8.16	p > 0.05, not analyzed	p > 0.05, not analyzed	740.791	781.37	653.945	788.489	726.019	696.606	0.0230168	0.123376	0.186558	0.852007	0.999962
WBGene00000544	clp-3	Y47H10A.1	p > 0.05, not analyzed	p > 0.05, not analyzed	6.1519	9.81624	4.80657	9.64209	8.65826	7.52101	0.313896	0.724227	0.433421	0.664709	0.999962
WBGene00000545	clp-4	Y39A3CL.5	p > 0.05, not analyzed	p > 0.05, not analyzed	142.715	116.674	109.57	111.421	127.31	101.139	-0.114196	0.213307	-0.53536	0.592401	0.999962
WBGene00000546	clp-6	Y77E11A.10	p > 0.05, not analyzed	p > 0.05, not analyzed	4.91998	3.26803	9.6049	4.28561	2.60075	5.85608	-0.494406	0.908362	-0.544283	0.586247	0.999962
WBGene00000547	clp-7	Y77E11A.11	p > 0.05, not analyzed	p > 0.05, not analyzed	629.374	638.862	525.107	684.947	619.995	595.945	0.0849291	0.130786	0.649375	0.516096	0.999962
WBGene00000548	clr-1	F56D1.4	p > 0.05, not analyzed	p > 0.05, not analyzed	2055.02	2110.21	1602.18	2101.32	1864.09	1804.3	0.000800091	0.125573	0.00637152	0.994916	0.999962
WBGene00000549	cls-2	R107.6	p > 0.05, not analyzed	p > 0.05, not analyzed	1200.23	1270.41	1012.7	1211.97	1045.22	1186.55	-0.016089	0.122913	-0.130897	0.895857	0.999962
WBGene00000550	clu-1	F55H2.6	p > 0.05, not analyzed	p > 0.05, not analyzed	5826.26	5937.61	4691.54	5902.1	5092.04	5222.76	-0.0210002	0.116055	-0.18095	0.856406	0.999962
WBGene00000552	cmd-1	T21H3.3	p > 0.05, not analyzed	p > 0.05, not analyzed	1029.7	1091.05	886.806	1006.09	962.695	1142.84	0.0495423	0.12389	0.399889	0.689238	0.999962
WBGene00000553	cmk-1	K07A9.2	p > 0.05, not analyzed	p > 0.05, not analyzed	14.7531	7.6114	7.67414	12.8579	17.3708	10.0553	0.43962	0.609233	0.721596	0.470543	0.999962
WBGene00000554	cnb-1	F55C10.1	p > 0.05, not analyzed	p > 0.05, not analyzed	134.901	133.555	150.169	169.353	184.871	160.881	0.297187	0.184484	1.61091	0.107199	0.999962
WBGene00000556	cnc-2	R09B5.3	p > 0.05, not analyzed	p > 0.05, not analyzed	7.23097	3.0332	8.12078	4.29874	4.6935	12.6224	0.244526	0.819614	0.298343	0.765441	0.999962
WBGene00000557	cnc-3	R09B5.8	p > 0.05, not analyzed	p > 0.05, not analyzed	40.0411	25.8961	40.7884	21.4601	23.7468	20.143	-0.707141	0.393977	-1.79488	0.0726732	0.999962
WBGene00000558	cnc-4	R09B5.9	p > 0.05, not analyzed	p > 0.05, not analyzed	19.4042	22.7512	34.2586	23.6065	14.6385	22.8067	-0.337695	0.445356	-0.758257	0.448297	0.999962
WBGene00000561	cnd-1	C34E10.7	p > 0.05, not analyzed	p > 0.05, not analyzed	3.69325	6.5591	0.962833	5.35615	8.63824	5.00393	0.782089	0.941826	0.830397	0.406314	0.999962
WBGene00000562	cng-1	F14H8.6	p > 0.05, not analyzed	p > 0.05, not analyzed	14.1662	12.5458	14.0762	13.4528	8.00711	20.5731	0.043097	0.566208	0.076115	0.939328	0.999962
WBGene00000564	cnk-1	R01H10.8	p > 0.05, not analyzed	p > 0.05, not analyzed	400.051	496.055	377.299	424.217	424.355	440.542	0.0184727	0.143544	0.128689	0.897603	0.999962
WBGene00000565	cnt-1	Y17G7B.15	p > 0.05, not analyzed	p > 0.05, not analyzed	236.782	286.842	271.445	300.461	249.689	276.83	0.0525742	0.157911	0.332937	0.739182	0.999962
WBGene00000566	cnt-2	Y39A1A.15	p > 0.05, not analyzed	p > 0.05, not analyzed	1038.51	1165.97	985.903	1124.5	961.275	1036.95	-0.0314564	0.118385	-0.265714	0.79046	0.999962
WBGene00000567	cnx-1	ZK632.6	p > 0.05, not analyzed	p > 0.05, not analyzed	3422.8	3350.2	3117.71	3454.55	3504.5	3323.48	0.0562413	0.0953301	0.589963	0.555215	0.999962
WBGene00000583	cof-2	C48E7.5	p > 0.05, not analyzed	p > 0.05, not analyzed	9.83342	11.9513	11.5049	4.2861	13.0386	7.54678	-0.407331	0.665267	-0.612282	0.540351	0.999962
WBGene00000584	cog-1	R03C1.3	p > 0.05, not analyzed	p > 0.05, not analyzed	5.47368	6.74867	1.70405	8.64112	3.59838	3.00414	0.113683	0.950377	0.119619	0.904785	0.999962
WBGene00000585	cogc-2	C06G3.10	p > 0.05, not analyzed	p > 0.05, not analyzed	1272.01	1281.83	1183.81	1390.64	1212.09	1236.66	0.0383509	0.10981	0.349248	0.726903	0.999962
WBGene00000591	coh-1	K08A8.3	p > 0.05, not analyzed	p > 0.05, not analyzed	356.128	166.39	231.361	168.43	216.29	177.523	-0.397214	0.226991	-1.74991	0.080134	0.999962
WBGene00000592	coh-3	F08H9.1	p > 0.05, not analyzed	p > 0.05, not analyzed	672.848	676.641	546.608	684.619	669.099	652.398	0.0827247	0.127972	0.646428	0.518002	0.999962
WBGene00000594	col-3	T28C6.6	p > 0.05, not analyzed	p > 0.05, not analyzed	0	159.3	63.8185	0	54.4121	43.9676	-1.18091	2.5917	-0.45565	0.648642	0.999962
WBGene00000596	col-7	C15A11.5	p > 0.05, not analyzed	p > 0.05, not analyzed	3.68704	0	11.5007	0	5.21824	5.87244	-0.446056	1.17989	-0.378047	0.705395	0.999962
WBGene00000597	col-8	F11H8.3	p > 0.05, not analyzed	p > 0.05, not analyzed	6913.43	5892.34	9161.89	5795.18	6967.73	7619.24	-0.108094	0.148073	-0.730003	0.465388	0.999962
WBGene00000599	col-10	B0222.8	p > 0.05, not analyzed	p > 0.05, not analyzed	175.344	185.104	195.244	203.669	240.505	171.666	0.146318	0.181745	0.805072	0.420778	0.999962
WBGene00000601	col-12	F15H10.1	p > 0.05, not analyzed	p > 0.05, not analyzed	25.0704	31.8759	54.8809	48.3358	63.5382	41.1758	0.443703	0.355568	1.24787	0.212079	0.999962
WBGene00000602	col-13	F15H10.2	p > 0.05, not analyzed	p > 0.05, not analyzed	29.4455	15.1006	52.4651	11.7903	19.2659	25.3185	-0.779761	0.485032	-1.60765	0.107912	0.999962
WBGene00000603	col-14	C46A5.3	p > 0.05, not analyzed	p > 0.05, not analyzed	81.6876	51.2197	86.137	75.4927	88.4995	68.9019	0.089104	0.26902	0.331217	0.74048	0.999962
WBGene00000606	col-17	F11G11.10	p > 0.05, not analyzed	p > 0.05, not analyzed	4.90837	3.23787	6.68027	4.28728	0	3.37394	-0.98156	1.11233	-0.882437	0.377541	0.999962
WBGene00000608	col-19	ZK1193.1	p > 0.05, not analyzed	p > 0.05, not analyzed	7108.91	7366.15	9791.15	5394.19	7431.99	8904.38	-0.159162	0.160419	-0.992162	0.321118	0.999962
WBGene00000609	col-20	F11G11.11	p > 0.05, not analyzed	p > 0.05, not analyzed	8138.42	8094.33	11000	6533.3	8338.78	10733.8	-0.0888239	0.159704	-0.556178	0.578089	0.999962
WBGene00000611	col-34	F36A4.10	p > 0.05, not analyzed	p > 0.05, not analyzed	26.9756	17.2181	19.0475	17.1511	18.4338	15.2224	-0.309144	0.469246	-0.65881	0.510018	0.999962
WBGene00000616	col-39	C09G5.4	p > 0.05, not analyzed	p > 0.05, not analyzed	22.081	26.9505	16.2102	33.228	35.0489	21.1092	0.455651	0.423673	1.07548	0.282162	0.999962
WBGene00000620	col-43	ZC513.8	p > 0.05, not analyzed	p > 0.05, not analyzed	3.68104	5.39506	6.67908	5.35916	7.87855	10.9678	0.616411	0.789458	0.780802	0.434919	0.999962
WBGene00000625	col-48	Y54E10BL.2	p > 0.05, not analyzed	p > 0.05, not analyzed	53.9349	59.1186	58.048	54.6714	54.4887	48.2539	-0.123488	0.281483	-0.438704	0.660876	0.999962
WBGene00000626	col-49	K09H9.3	p > 0.05, not analyzed	p > 0.05, not analyzed	4.9028	4.29827	13.3198	6.432	0	3.38713	-1.24667	0.996511	-1.25104	0.210922	0.999962
WBGene00000630	col-53	M01A12.1	p > 0.05, not analyzed	p > 0.05, not analyzed	9.80475	7.51946	7.60952	6.43208	5.27652	10.1644	-0.176991	0.71993	-0.245844	0.805803	0.999962
WBGene00000631	col-54	F33D11.3	p > 0.05, not analyzed	p > 0.05, not analyzed	4.90369	11.8285	3.80749	2.14395	5.27093	5.07755	-0.696876	0.890607	-0.782473	0.433937	0.999962
WBGene00000634	col-58	F26B1.4	p > 0.05, not analyzed	p > 0.05, not analyzed	15.9436	12.9243	9.52929	12.8629	8.77054	14.366	-0.0836561	0.579582	-0.144339	0.885233	0.999962
WBGene00000636	col-60	F22D6.10	p > 0.05, not analyzed	p > 0.05, not analyzed	4.90915	0	8.59262	6.43076	5.24766	3.37208	0.133235	1.01045	0.131857	0.895097	0.999962
WBGene00000638	col-62	C15A11.6	p > 0.05, not analyzed	p > 0.05, not analyzed	12.2662	19.3983	19.0667	10.7188	6.13554	16.0475	-0.62822	0.569265	-1.10356	0.269782	0.999962
WBGene00000639	col-63	ZK265.2	p > 0.05, not analyzed	p > 0.05, not analyzed	4.91111	5.40817	17.2038	11.789	4.3661	9.26045	-0.148634	0.740621	-0.200688	0.840943	0.999962
WBGene00000640	col-64	F52F12.2	p > 0.05, not analyzed	p > 0.05, not analyzed	11.0552	2.16727	11.484	8.57316	6.10099	5.04287	-0.336968	0.785338	-0.429074	0.667869	0.999962
WBGene00000641	col-65	K08C9.4	p > 0.05, not analyzed	p > 0.05, not analyzed	52.736	53.8499	53.3631	51.4516	61.3953	50.7048	0.0331714	0.284873	0.116443	0.907302	0.999962
WBGene00000644	col-68	C50D2.4	p > 0.05, not analyzed	p > 0.05, not analyzed	17.1803	12.9544	20.9985	9.6463	15.7493	19.3962	-0.182548	0.521516	-0.350034	0.726314	0.999962
WBGene00000647	col-71	Y49F6B.10	p > 0.05, not analyzed	p > 0.05, not analyzed	4.9127	12.996	7.65285	7.5017	6.10466	11.7728	-0.0116308	0.711126	-0.0163555	0.986951	0.999962
WBGene00000649	col-73	F11G11.12	p > 0.05, not analyzed	p > 0.05, not analyzed	11.0366	9.68916	37.1534	18.2227	0	7.60839	-1.17548	1.41498	-0.830739	0.406121	0.999962
WBGene00000650	col-74	ZK1248.2	p > 0.05, not analyzed	p > 0.05, not analyzed	419.114	320.406	398.744	316.105	436.507	357.319	-0.0339063	0.162392	-0.208793	0.834609	0.999962
WBGene00000652	col-76	M110.1	p > 0.05, not analyzed	p > 0.05, not analyzed	72.5216	76.0542	65.1946	76.0783	84.3159	67.9206	0.0964543	0.250933	0.384384	0.700694	0.999962
WBGene00000653	col-77	M195.1	p > 0.05, not analyzed	p > 0.05, not analyzed	56.4249	50.6521	50.5275	80.3911	70.1188	48.986	0.336097	0.289565	1.1607	0.245765	0.999962
WBGene00000656	col-80	C09G5.5	p > 0.05, not analyzed	p > 0.05, not analyzed	4542.62	3992.16	5542.24	3578.96	3702.67	5369.87	-0.153942	0.154507	-0.996342	0.319084	0.999962
WBGene00000657	col-81	F38A3.1	p > 0.05, not analyzed	p > 0.05, not analyzed	125.117	142.26	203.066	69.6723	110.435	149.489	-0.510393	0.261047	-1.95518	0.0505619	0.999962
WBGene00000664	col-89	F17C8.2	p > 0.05, not analyzed	p > 0.05, not analyzed	8.58445	5.38381	7.62213	4.28767	7.89547	5.91672	-0.241611	0.777471	-0.310766	0.755979	0.999962
WBGene00000667	col-92	W05B2.6	p > 0.05, not analyzed	p > 0.05, not analyzed	133.686	170.194	239.209	139.347	109.616	170.681	-0.376754	0.231977	-1.6241	0.104354	0.999962
WBGene00000668	col-93	W05B2.5	p > 0.05, not analyzed	p > 0.05, not analyzed	8922.48	8287.42	11152.9	7038.12	8547.8	11311	-0.0764896	0.154051	-0.496523	0.619526	0.999962
WBGene00000669	col-94	W05B2.1	p > 0.05, not analyzed	p > 0.05, not analyzed	1167.7	1072.15	1421.28	901.458	1158.9	1436	-0.0658427	0.158318	-0.41589	0.677491	0.999962
WBGene00000670	col-95	Y41C4A.16	p > 0.05, not analyzed	p > 0.05, not analyzed	2608.23	2536.32	2847.92	2503.86	2473.63	3002.55	-0.0021659	0.111961	-0.0193451	0.984566	0.999962
WBGene00000671	col-96	Y41C4A.19	p > 0.05, not analyzed	p > 0.05, not analyzed	142.311	160.677	129.711	110.401	111.243	143.501	-0.240628	0.205708	-1.16976	0.242099	0.999962
WBGene00000672	col-97	ZK1010.7	p > 0.05, not analyzed	p > 0.05, not analyzed	33.1454	36.7555	48.7256	32.1525	20.969	28.6371	-0.549445	0.369632	-1.48647	0.137156	0.999962
WBGene00000673	col-98	F14F7.1	p > 0.05, not analyzed	p > 0.05, not analyzed	1778.76	1660.22	2476.42	1349.48	1722.58	2079.6	-0.199325	0.164425	-1.21225	0.225416	0.999962
WBGene00000674	col-99	F29C4.8	p > 0.05, not analyzed	p > 0.05, not analyzed	16.6875	18.4871	14.8226	12.0261	7.28565	9.92852	-0.783134	0.561662	-1.39432	0.163222	0.999962
WBGene00000675	col-101	K02D7.3	p > 0.05, not analyzed	p > 0.05, not analyzed	7137.03	6413.63	8641.48	5845.01	7278.7	7841.97	-0.0819789	0.133395	-0.614557	0.538847	0.999962
WBGene00000677	col-103	F56B3.1	p > 0.05, not analyzed	p > 0.05, not analyzed	1144.05	1173.71	1542.7	895.993	1031.25	1294.02	-0.261021	0.152067	-1.71648	0.0860738	0.999962
WBGene00000678	col-104	F58F6.1	p > 0.05, not analyzed	p > 0.05, not analyzed	40.4509	42.9941	50.4342	35.3757	41.3072	37.2496	-0.235044	0.322459	-0.728912	0.466056	0.999962
WBGene00000680	col-106	Y77E11A.15	p > 0.05, not analyzed	p > 0.05, not analyzed	6339.48	5543.33	8200.32	5112.49	5874.65	6690.05	-0.184104	0.141595	-1.30021	0.193528	0.999962
WBGene00000681	col-107	C34H4.4	p > 0.05, not analyzed	p > 0.05, not analyzed	41.6819	33.3366	36.1726	42.8788	23.7178	26.2327	-0.269839	0.371327	-0.726686	0.467418	0.999962
WBGene00000683	col-109	Y38C1BA.3	p > 0.05, not analyzed	p > 0.05, not analyzed	36.8217	39.9712	42.0177	37.5123	34.0986	27.8118	-0.264807	0.343164	-0.771664	0.440313	0.999962
WBGene00000685	col-111	F29B9.9	p > 0.05, not analyzed	p > 0.05, not analyzed	20.1939	16.4079	34.6081	10.6715	18.4221	10.261	-0.836026	0.510399	-1.63799	0.101425	0.999962
WBGene00000687	col-113	C34D4.15	p > 0.05, not analyzed	p > 0.05, not analyzed	17.1945	16.2895	28.5678	19.2083	20.156	21.89	-0.0278106	0.458151	-0.0607018	0.951597	0.999962
WBGene00000689	col-115	Y42H9B.1	p > 0.05, not analyzed	p > 0.05, not analyzed	12.2813	9.74549	11.478	12.8601	11.339	9.25136	-0.0067702	0.598277	-0.0113162	0.990971	0.999962
WBGene00000690	col-116	F17E9.1	p > 0.05, not analyzed	p > 0.05, not analyzed	6.14844	4.35304	9.59828	7.50015	12.1491	10.0478	0.557887	0.711175	0.784458	0.432771	0.999962
WBGene00000691	col-117	T28C6.4	p > 0.05, not analyzed	p > 0.05, not analyzed	169.223	0	88.5886	214.386	145.673	82.0108	0.778176	1.71693	0.453236	0.650379	0.999962
WBGene00000692	col-118	T11B7.3	p > 0.05, not analyzed	p > 0.05, not analyzed	103.942	105.141	115.853	84.4661	92.523	100.417	-0.227168	0.218479	-1.03977	0.298446	0.999962
WBGene00000693	col-119	C53B4.5	p > 0.05, not analyzed	p > 0.05, not analyzed	16770.3	15015.4	20352.7	13550.7	17279.9	21042.1	-0.00733144	0.148314	-0.0494317	0.960575	0.999962
WBGene00000694	col-120	Y11D7A.11	p > 0.05, not analyzed	p > 0.05, not analyzed	1.22671	2.15594	10.4886	9.64685	1.75253	2.5332	-0.0563723	1.05745	-0.0533098	0.957485	0.999962
WBGene00000695	col-121	F56D5.1	p > 0.05, not analyzed	p > 0.05, not analyzed	27.0084	36.7614	37.2649	20.3631	64.6438	28.633	0.173466	0.419075	0.413927	0.678928	0.999962
WBGene00000696	col-122	T05A1.2	p > 0.05, not analyzed	p > 0.05, not analyzed	10922.1	9199.22	12256.5	7941	9853.45	11663.1	-0.136268	0.140289	-0.971337	0.33138	0.999962
WBGene00000698	col-124	C24F3.6	p > 0.05, not analyzed	p > 0.05, not analyzed	7410.02	7029.23	10256.4	5235.75	7078.67	9647.41	-0.169227	0.281651	-0.600837	0.547949	0.999962
WBGene00000699	col-125	C29F4.1	p > 0.05, not analyzed	p > 0.05, not analyzed	31.8751	18.2829	33.3188	39.6628	30.7427	50.7692	0.538421	0.381595	1.41097	0.158253	0.999962
WBGene00000703	col-129	M18.1	p > 0.05, not analyzed	p > 0.05, not analyzed	221.341	207.638	306.664	122.093	158.756	257.334	-0.447595	0.23737	-1.88564	0.0593434	0.999962
WBGene00000704	col-130	F08G5.4	p > 0.05, not analyzed	p > 0.05, not analyzed	4.90452	12.9122	9.52308	13.9353	16.68	7.61189	0.467563	0.642326	0.727921	0.466662	0.999962
WBGene00000705	col-131	C39E9.3	p > 0.05, not analyzed	p > 0.05, not analyzed	4.90505	4.30586	8.57325	1.07193	2.63257	3.38181	-1.31059	1.01849	-1.2868	0.198165	0.999962
WBGene00000707	col-133	F52B11.4	p > 0.05, not analyzed	p > 0.05, not analyzed	12.2615	13.989	30.475	10.7194	17.557	21.1431	-0.204148	0.526971	-0.387399	0.69846	0.999962
WBGene00000708	col-135	M199.5	p > 0.05, not analyzed	p > 0.05, not analyzed	201.318	174.312	122.607	132.36	123.591	116.019	-0.417436	0.213208	-1.95788	0.0502435	0.999962
WBGene00000711	col-138	C52D10.13	p > 0.05, not analyzed	p > 0.05, not analyzed	2.45002	0	10.4497	11.7929	1.76216	8.48419	0.729714	1.02149	0.714363	0.475003	0.999962
WBGene00000712	col-139	F41F3.4	p > 0.05, not analyzed	p > 0.05, not analyzed	161.884	198.153	249.65	91.1125	131.571	206.213	-0.504413	0.250976	-2.0098	0.0444521	0.999962
WBGene00000713	col-140	F26F12.1	p > 0.05, not analyzed	p > 0.05, not analyzed	14930.1	13123.8	18494.4	12059.7	15103.8	18260.7	-0.0352287	0.14899	-0.23645	0.813084	0.999962
WBGene00000714	col-141	T15B7.5	p > 0.05, not analyzed	p > 0.05, not analyzed	13.4902	5.38434	8.57548	2.14383	7.89467	3.38069	-1.00538	0.81936	-1.22703	0.219811	0.999962
WBGene00000715	col-142	T15B7.4	p > 0.05, not analyzed	p > 0.05, not analyzed	553.232	608.999	839.992	446.972	507.403	814.067	-0.178884	0.199208	-0.897979	0.369197	0.999962
WBGene00000716	col-143	T15B7.3	p > 0.05, not analyzed	p > 0.05, not analyzed	2340.35	2192.93	2702.57	2019.43	2182.65	3407.34	0.072923	0.163681	0.44552	0.655944	0.999962
WBGene00000717	col-144	B0222.6	p > 0.05, not analyzed	p > 0.05, not analyzed	223.226	170.219	178.233	235.817	243.749	206.143	0.265115	0.175671	1.50916	0.131258	0.999962
WBGene00000719	col-146	T06E4.6	p > 0.05, not analyzed	p > 0.05, not analyzed	6.12974	6.45243	2.85579	4.28788	7.90571	5.92337	0.253962	0.854051	0.297361	0.766191	0.999962
WBGene00000720	col-147	T06E4.4	p > 0.05, not analyzed	p > 0.05, not analyzed	36.827	34.589	24.8383	35.368	47.1865	23.5862	0.146537	0.383173	0.382429	0.702143	0.999962
WBGene00000722	col-149	B0024.1	p > 0.05, not analyzed	p > 0.05, not analyzed	7.36061	10.7818	15.2583	9.64677	12.2652	15.1966	0.144356	0.598696	0.241118	0.809464	0.999962
WBGene00000723	col-150	B0024.2	p > 0.05, not analyzed	p > 0.05, not analyzed	17.1711	5.38654	18.109	7.50328	5.26091	8.44864	-0.940404	0.674159	-1.39493	0.163037	0.999962
WBGene00000726	col-153	F17C11.3	p > 0.05, not analyzed	p > 0.05, not analyzed	30.7072	13.0007	47.8423	25.7197	23.5379	23.5382	-0.340259	0.45155	-0.753536	0.451128	0.999962
WBGene00000727	col-154	F55C10.2	p > 0.05, not analyzed	p > 0.05, not analyzed	6.13574	6.47685	8.58995	4.28725	5.25006	5.06013	-0.540686	0.811236	-0.666496	0.505094	0.999962
WBGene00000728	col-155	F55C10.3	p > 0.05, not analyzed	p > 0.05, not analyzed	158.169	176.458	145.698	117.914	163.298	214.835	0.0528533	0.217986	0.242462	0.808422	0.999962
WBGene00000730	col-157	T11F9.9	p > 0.05, not analyzed	p > 0.05, not analyzed	6.13035	6.4549	6.66528	7.50368	2.6342	4.22953	-0.444771	0.852533	-0.521706	0.601875	0.999962
WBGene00000731	col-158	D2023.7	p > 0.05, not analyzed	p > 0.05, not analyzed	28.2382	21.6307	23.8927	17.1477	27.0724	11.787	-0.393481	0.461993	-0.851704	0.394379	0.999962
WBGene00000732	col-159	F57B1.3	p > 0.05, not analyzed	p > 0.05, not analyzed	223.289	170.404	268.983	117.904	128.745	243.08	-0.433065	0.24918	-1.73796	0.0822176	0.999962
WBGene00000733	col-160	F57B1.4	p > 0.05, not analyzed	p > 0.05, not analyzed	2489.63	2302.49	3119.89	2104.45	2067.98	3377.26	-0.0675009	0.168832	-0.399811	0.689295	0.999962
WBGene00000734	col-161	C50B6.4	p > 0.05, not analyzed	p > 0.05, not analyzed	6.12961	1.07531	18.0856	9.64775	1.75698	4.23129	-0.735478	0.928877	-0.791793	0.428481	0.999962
WBGene00000735	col-162	Y2H9A.3	p > 0.05, not analyzed	p > 0.05, not analyzed	2.45174	3.2254	13.3246	3.21594	2.63592	2.53916	-1.21154	1.01445	-1.19428	0.232368	0.999962
WBGene00000738	col-165	F14H12.1	p > 0.05, not analyzed	p > 0.05, not analyzed	323.949	352.914	432.297	302.254	408.718	324.753	-0.099841	0.164669	-0.606313	0.544307	0.999962
WBGene00000739	col-166	T07H6.3	p > 0.05, not analyzed	p > 0.05, not analyzed	37.9949	51.5699	39.9542	49.3124	39.5676	57.5905	0.176885	0.318137	0.556001	0.57821	0.999962
WBGene00000740	col-167	T10E10.2	p > 0.05, not analyzed	p > 0.05, not analyzed	56.3795	92.3961	52.321	88.9766	84.411	55.8967	0.185562	0.293559	0.632111	0.527314	0.999962
WBGene00000741	col-168	T10E10.1	p > 0.05, not analyzed	p > 0.05, not analyzed	19.6103	7.52061	13.3181	15.0081	11.4307	19.4792	0.195118	0.559914	0.348478	0.727481	0.999962
WBGene00000742	col-169	T10E10.5	p > 0.05, not analyzed	p > 0.05, not analyzed	4.90245	3.22282	8.56107	5.36006	6.15555	4.23494	-0.0985463	0.865511	-0.113859	0.909349	0.999962
WBGene00000745	col-172	F38B6.5	p > 0.05, not analyzed	p > 0.05, not analyzed	4.52311	6.5979	7.66101	3.12053	3.22116	4.17735	-0.870932	0.904286	-0.963115	0.33549	0.999962
WBGene00000747	col-174	F46C8.2	p > 0.05, not analyzed	p > 0.05, not analyzed	17.1953	3.24965	2.87022	2.14333	3.48766	5.0446	-1.08277	0.948988	-1.14098	0.25388	0.999962
WBGene00000748	col-175	C35B8.1	p > 0.05, not analyzed	p > 0.05, not analyzed	4.90321	3.22475	12.3711	12.8639	0.878824	1.69308	-0.465891	0.982669	-0.474107	0.635423	0.999962
WBGene00000749	col-176	ZC373.7	p > 0.05, not analyzed	p > 0.05, not analyzed	6.13509	1.07903	10.4958	1.07183	8.75377	10.9676	0.240546	0.921744	0.260968	0.794117	0.999962
WBGene00000750	col-177	F59F3.2	p > 0.05, not analyzed	p > 0.05, not analyzed	2.45746	2.16985	6.7045	5.35796	4.35257	4.19798	0.264942	0.984296	0.269169	0.787799	0.999962
WBGene00000751	col-178	C34F6.2	p > 0.05, not analyzed	p > 0.05, not analyzed	8941.18	7897.73	11467.6	6998.71	8340.88	11630.7	-0.0697072	0.164906	-0.422709	0.672507	0.999962
WBGene00000752	col-179	C34F6.3	p > 0.05, not analyzed	p > 0.05, not analyzed	3109.66	2867.19	4367.05	2510.48	3374.7	4003.86	-0.0648222	0.167454	-0.387104	0.698679	0.999962
WBGene00000753	col-180	C44C10.1	p > 0.05, not analyzed	p > 0.05, not analyzed	3.67684	5.37137	10.4635	4.28805	9.673	5.08193	-0.0473579	0.816631	-0.0579918	0.953755	0.999962
WBGene00000754	col-181	W03G11.1	p > 0.05, not analyzed	p > 0.05, not analyzed	11339.2	9554.31	13539.1	8201.41	10930	12390.1	-0.127378	0.149639	-0.851237	0.394638	0.999962
WBGene00000755	col-182	R09A8.4	p > 0.05, not analyzed	p > 0.05, not analyzed	7.3506	3.21765	6.65115	4.2883	0.880821	1.69641	-1.36419	1.05826	-1.28908	0.19737	0.999962
WBGene00000757	col-184	F15A2.1	p > 0.05, not analyzed	p > 0.05, not analyzed	5583.01	4792.55	6722.26	4143.07	5751.05	6381.92	-0.070923	0.152694	-0.464478	0.642305	0.999962
WBGene00000759	col-186	E03G2.4	p > 0.05, not analyzed	p > 0.05, not analyzed	3.61719	2.25053	6.57803	6.30982	2.71471	4.12097	0.0482758	0.979755	0.0492733	0.960701	0.999962
WBGene00000761	coq-1	C24A11.9	p > 0.05, not analyzed	p > 0.05, not analyzed	481.766	513.605	487.801	523.989	556.647	536.098	0.124683	0.123252	1.0116	0.311728	0.999962
WBGene00000762	coq-2	F57B9.4	p > 0.05, not analyzed	p > 0.05, not analyzed	325.315	324.484	322.193	346.797	313.476	330.209	0.0262828	0.140194	0.187475	0.851288	0.999962
WBGene00000763	coq-3	Y57G11C.11	p > 0.05, not analyzed	p > 0.05, not analyzed	244.642	191.642	191.754	199.943	209.285	176.449	-0.0934191	0.176808	-0.528365	0.597246	0.999962
WBGene00000764	coq-4	T03F1.2	p > 0.05, not analyzed	p > 0.05, not analyzed	161.537	177.307	192.325	159.762	170.728	195.811	-0.0135875	0.180296	-0.0753622	0.939926	0.999962
WBGene00000765	coq-5	ZK652.9	p > 0.05, not analyzed	p > 0.05, not analyzed	603.289	609.154	762.91	667.817	740.786	953	0.257602	0.152143	1.69316	0.0904246	0.999962
WBGene00000766	coq-6	K07B1.2	p > 0.05, not analyzed	p > 0.05, not analyzed	262.877	239.515	239.271	300.059	232.679	279.007	0.129598	0.161313	0.803397	0.421745	0.999962
WBGene00000767	coq-8	C35D10.4	p > 0.05, not analyzed	p > 0.05, not analyzed	1261.12	1330.59	1170.84	1401.32	1237.32	1185.02	0.0227184	0.114256	0.198838	0.84239	0.999962
WBGene00000768	cor-1	R01H10.3	p > 0.05, not analyzed	p > 0.05, not analyzed	54.384	70.0191	75.6699	44.6215	62.1573	43.8272	-0.412315	0.289975	-1.4219	0.155055	0.999962
WBGene00000770	cpb-1	C40H1.1	p > 0.05, not analyzed	p > 0.05, not analyzed	492.121	523.402	403.682	533.535	436.487	433.807	-0.0161549	0.147919	-0.109214	0.913032	0.999962
WBGene00000772	cpb-3	B0414.5	p > 0.05, not analyzed	p > 0.05, not analyzed	2239.98	2211.38	1645.25	2292.55	1956.91	2067.7	0.051667	0.130401	0.396216	0.691946	0.999962
WBGene00000773	cpf-1	F28C6.3	p > 0.05, not analyzed	p > 0.05, not analyzed	1029.49	1151.37	1222.49	1134.85	1178.66	1330.75	0.0983416	0.117779	0.834966	0.403737	0.999962
WBGene00000774	cpf-2	F56A8.6	p > 0.05, not analyzed	p > 0.05, not analyzed	703.149	749.128	643.275	697.751	646.658	743.864	-0.00421988	0.123186	-0.0342562	0.972673	0.999962
WBGene00000775	cpin-1	F38E11.3	p > 0.05, not analyzed	p > 0.05, not analyzed	48.0601	33.7084	66.254	49.5832	49.8203	45.5163	-0.0376862	0.321269	-0.117304	0.906619	0.999962
WBGene00000776	cpl-1	T03E6.7	p > 0.05, not analyzed	p > 0.05, not analyzed	11858.3	10954.1	9583.63	10908.1	9405.77	9951.79	-0.0980531	0.109054	-0.89912	0.368589	0.999962
WBGene00000777	cpn-1	F43G9.9	p > 0.05, not analyzed	p > 0.05, not analyzed	2065.34	2121.17	2040.77	2354.55	2299.9	2203.27	0.13895	0.0962781	1.44322	0.14896	0.999962
WBGene00000778	cpn-2	D1069.2	p > 0.05, not analyzed	p > 0.05, not analyzed	22.5274	21.7788	41.3067	19.7437	21.6107	18.9932	-0.515309	0.43494	-1.18478	0.236104	0.999962
WBGene00000779	cpn-3	F28H1.2	p > 0.05, not analyzed	p > 0.05, not analyzed	622.646	501.816	586.575	327.121	508.893	580.974	-0.268867	0.178971	-1.50229	0.133023	0.999962
WBGene00000781	cpr-1	C52E4.1	p > 0.05, not analyzed	p > 0.05, not analyzed	5787.73	5634.27	4165.66	5465.28	4463.04	4622.75	-0.0991816	0.132838	-0.746638	0.455282	0.999962
WBGene00000783	cpr-3	T10H4.12	p > 0.05, not analyzed	p > 0.05, not analyzed	61.4196	85.6164	46.8963	65.3701	65.3607	52.9452	-0.0771957	0.291473	-0.264847	0.791127	0.999962
WBGene00000784	cpr-4	F44C4.3	p > 0.05, not analyzed	p > 0.05, not analyzed	4417.05	4178.5	3608.04	5308.59	4330.03	4601.9	0.222768	0.115606	1.92696	0.0539843	0.999962
WBGene00000786	cpr-6	C25B8.3	p > 0.05, not analyzed	p > 0.05, not analyzed	7710.33	7159.06	6058.12	7406.53	6506.96	6372.2	-0.0448618	0.114374	-0.392237	0.694883	0.999962
WBGene00000787	cps-6	C41D11.8	p > 0.05, not analyzed	p > 0.05, not analyzed	353.239	404.009	343.128	363.373	348.08	378.483	-0.0133688	0.140542	-0.0951234	0.924217	0.999962
WBGene00000788	cpz-1	F32B5.8	p > 0.05, not analyzed	p > 0.05, not analyzed	2378.45	2307.26	1996.61	2234.64	2057.64	1851.54	-0.121282	0.114908	-1.05547	0.291211	0.999962
WBGene00000789	cpz-2	M04G12.2	p > 0.05, not analyzed	p > 0.05, not analyzed	401.883	355.078	441.805	381.473	394.864	358.232	-0.0807742	0.141744	-0.569861	0.568772	0.999962
WBGene00000792	crb-1	F11C7.4	p > 0.05, not analyzed	p > 0.05, not analyzed	108.396	79.9832	91.6122	96.4005	78.4281	84.8976	-0.108724	0.23571	-0.46126	0.644612	0.999962
WBGene00000793	crh-1	Y41C4A.4	p > 0.05, not analyzed	p > 0.05, not analyzed	286.669	330.646	245.094	368.265	297.899	312.052	0.182928	0.162595	1.12506	0.260565	0.999962
WBGene00000794	crn-1	Y47G6A.8	p > 0.05, not analyzed	p > 0.05, not analyzed	1314.17	1377.66	1124.06	1341.73	1296.72	1430.32	0.0934798	0.115578	0.808803	0.418628	0.999962
WBGene00000795	crn-2	CD4.2	p > 0.05, not analyzed	p > 0.05, not analyzed	146.005	174.754	136.419	151.13	168.997	162.868	0.081618	0.188132	0.433833	0.66441	0.999962
WBGene00000796	crn-3	C14A4.4	p > 0.05, not analyzed	p > 0.05, not analyzed	2116.8	2020.97	1763.36	2065.45	1954.7	1876.02	-0.00086908	0.109133	-0.00796352	0.993646	0.999962
WBGene00000797	crn-4	AH9.2	p > 0.05, not analyzed	p > 0.05, not analyzed	165.713	167.507	183.396	201.492	205.39	211.471	0.258165	0.169105	1.52666	0.126847	0.999962
WBGene00000799	crn-6	K04H4.6	p > 0.05, not analyzed	p > 0.05, not analyzed	66.6544	97.3305	71.6325	79.2084	77.7761	65.3883	-0.0876853	0.257023	-0.341157	0.732985	0.999962
WBGene00000800	cars-1	Y23H5A.7	p > 0.05, not analyzed	p > 0.05, not analyzed	3035.67	3031.82	2461.22	2976.75	2709.52	2760.98	-0.0135211	0.112486	-0.120203	0.904323	0.999962
WBGene00000801	cars-2	Y23H5A.1	p > 0.05, not analyzed	p > 0.05, not analyzed	78.2456	63.7307	73.2634	77.185	55.3062	43.4597	-0.298343	0.284765	-1.04768	0.294787	0.999962
WBGene00000802	crt-1	Y38A10A.5	p > 0.05, not analyzed	p > 0.05, not analyzed	6192.89	6413.79	5195.31	5901.44	5280.07	6110.27	-0.0417793	0.111347	-0.375217	0.707499	0.999962
WBGene00000803	csb-1	F53H4.1	p > 0.05, not analyzed	p > 0.05, not analyzed	334.849	295.141	231.07	313.872	324.819	312.763	0.148338	0.162574	0.912433	0.361541	0.999962
WBGene00000804	csc-1	Y48E1B.12	p > 0.05, not analyzed	p > 0.05, not analyzed	691.982	826.027	741.507	749.409	812.158	817.623	0.0745029	0.12033	0.619154	0.535815	0.999962
WBGene00000812	csk-1	Y48G1C.2	p > 0.05, not analyzed	p > 0.05, not analyzed	953.466	958.757	833.074	965.778	901.725	842.194	-0.0187499	0.118159	-0.158683	0.873918	0.999962
WBGene00000813	csn-1	Y59A8A.1	p > 0.05, not analyzed	p > 0.05, not analyzed	1120.27	1141.7	1212.34	1241.8	1232.15	1290.2	0.115187	0.104551	1.10174	0.270577	0.999962
WBGene00000814	csn-2	B0025.2	p > 0.05, not analyzed	p > 0.05, not analyzed	1579.48	1711.15	2121.64	1885.89	2139.28	2408.33	0.249028	0.13275	1.87592	0.0606662	0.999962
WBGene00000815	csn-3	Y38C1AA.2	p > 0.05, not analyzed	p > 0.05, not analyzed	1241.6	1285.83	1267.81	1231.16	1411.93	1482.83	0.121333	0.111423	1.08894	0.276181	0.999962
WBGene00000816	csn-4	Y55F3AM.15	p > 0.05, not analyzed	p > 0.05, not analyzed	860.529	928.299	830.544	993.284	884.457	884.275	0.0758051	0.115421	0.65677	0.511329	0.999962
WBGene00000817	csn-5	B0547.1	p > 0.05, not analyzed	p > 0.05, not analyzed	837.285	795.863	774.023	901.333	793.108	900.168	0.10843	0.116024	0.934551	0.35002	0.999962
WBGene00000818	csn-6	Y67H2A.6	p > 0.05, not analyzed	p > 0.05, not analyzed	1026.57	995.858	981.61	1112.19	1029.63	1072.12	0.0973743	0.106699	0.91261	0.361448	0.999962
WBGene00000819	csp-1	Y48E1B.13	p > 0.05, not analyzed	p > 0.05, not analyzed	28.562	13.0754	15.4782	31.5554	21.0799	15.0738	0.22152	0.488736	0.45325	0.650369	0.999962
WBGene00000822	csq-1	F40E10.3	p > 0.05, not analyzed	p > 0.05, not analyzed	803.46	721.018	745.788	482.229	705.572	698.095	-0.264815	0.148984	-1.77747	0.0754912	0.999962
WBGene00000830	ctl-1	Y54G11A.6	p > 0.05, not analyzed	p > 0.05, not analyzed	211.384	196.524	137.038	182.165	175.704	160.252	-0.0689563	0.196436	-0.351037	0.72556	0.999962
WBGene00000831	ctl-2	Y54G11A.5	p > 0.05, not analyzed	p > 0.05, not analyzed	344.154	309.593	262.663	333.247	252.995	261.662	-0.112532	0.167406	-0.67221	0.50145	0.999962
WBGene00000832	ctn-1	Y23H5A.5	p > 0.05, not analyzed	p > 0.05, not analyzed	136.036	120.876	135.633	143.122	138.845	132.064	0.0756877	0.192921	0.392325	0.694818	0.999962
WBGene00000833	cts-1	T20G5.2	p > 0.05, not analyzed	p > 0.05, not analyzed	5962.38	5856.22	4837.8	5899.68	5018.69	5489.6	-0.0215766	0.112882	-0.191143	0.848414	0.999962
WBGene00000834	cua-1	Y76A2A.2	p > 0.05, not analyzed	p > 0.05, not analyzed	1953.69	1952.89	1684.62	2014.64	1843.65	1840.83	0.0277533	0.108043	0.256874	0.797276	0.999962
WBGene00000836	cul-1	D2045.6	p > 0.05, not analyzed	p > 0.05, not analyzed	1004.16	1080.51	865.582	1064.88	806.404	1033.11	-0.0226055	0.136779	-0.16527	0.868731	0.999962
WBGene00000837	cul-2	ZK520.4	p > 0.05, not analyzed	p > 0.05, not analyzed	2571.16	2597.91	1991.05	2575.92	2284.9	2233	-0.0132133	0.123529	-0.106965	0.914817	0.999962
WBGene00000838	cul-3	Y108G3AL.1	p > 0.05, not analyzed	p > 0.05, not analyzed	2100.48	2175.22	1866.2	2068.48	1917.06	1939.81	-0.0517479	0.105398	-0.490978	0.623442	0.999962
WBGene00000839	cul-4	F45E12.3	p > 0.05, not analyzed	p > 0.05, not analyzed	1375.95	1531.97	1289.17	1436.6	1407.09	1330.73	-0.00782001	0.110367	-0.0708546	0.943513	0.999962
WBGene00000840	cul-5	ZK856.1	p > 0.05, not analyzed	p > 0.05, not analyzed	1172.75	1173.28	980.031	1310.21	1100.59	1178.43	0.11004	0.121438	0.906136	0.364864	0.999962
WBGene00000841	cul-6	K08E7.7	p > 0.05, not analyzed	p > 0.05, not analyzed	34.3263	14.0623	31.4656	29.7615	28.9407	42.4203	0.346447	0.411947	0.841	0.400348	0.999962
WBGene00000843	cup-2	F25D7.1	p > 0.05, not analyzed	p > 0.05, not analyzed	1099.39	1234.42	1234.75	1283.19	1241.58	1173.02	0.0501412	0.109119	0.459509	0.645869	0.999962
WBGene00000845	cup-4	C02C2.3	p > 0.05, not analyzed	p > 0.05, not analyzed	44.2292	39.0397	62.2366	51.4374	61.8349	73.0739	0.354778	0.302151	1.17417	0.240326	0.999962
WBGene00000846	cup-5	R13A5.1	p > 0.05, not analyzed	p > 0.05, not analyzed	903.697	930.065	844.063	1021.3	884.72	968.719	0.10216	0.114848	0.889524	0.373721	0.999962
WBGene00000853	cut-6	M142.2	p > 0.05, not analyzed	p > 0.05, not analyzed	12.2965	21.7625	27.8327	19.2862	13.8864	13.3985	-0.432487	0.499088	-0.866556	0.386185	0.999962
WBGene00000854	cux-7	C07H6.8	p > 0.05, not analyzed	p > 0.05, not analyzed	758.86	873.213	785.538	783.156	819.738	831.318	0.0100317	0.115812	0.0866203	0.930973	0.999962
WBGene00000857	cwn-1	K10B4.6	p > 0.05, not analyzed	p > 0.05, not analyzed	70.0082	51.9906	60.2715	50.3683	65.3986	41.2003	-0.212752	0.295707	-0.71947	0.471851	0.999962
WBGene00000858	cwn-2	W01B6.1	p > 0.05, not analyzed	p > 0.05, not analyzed	34.4006	34.7023	47.8747	32.1484	38.3198	35.2767	-0.149493	0.343572	-0.435115	0.663479	0.999962
WBGene00000863	cya-1	ZK507.6	p > 0.05, not analyzed	p > 0.05, not analyzed	831.491	887.872	729.045	886.047	774.106	774.631	-0.00825271	0.124661	-0.0662009	0.947218	0.999962
WBGene00000865	cyb-1	ZC168.4	p > 0.05, not analyzed	p > 0.05, not analyzed	3513.96	3735.4	3236.59	3989.84	3775.62	3331.76	0.0816135	0.108165	0.75453	0.450531	0.999962
WBGene00000866	cyb-2.1	Y43E12A.1	p > 0.05, not analyzed	p > 0.05, not analyzed	1393.77	1628.96	1608.36	1706.14	1602.12	1740.76	0.123896	0.108635	1.14048	0.254085	0.999962
WBGene00000867	cyb-2.2	H31G24.4	p > 0.05, not analyzed	p > 0.05, not analyzed	3086.62	3210.9	2949.78	3676.86	3294.72	3474.66	0.175783	0.09792	1.79517	0.0726271	0.999962
WBGene00000868	cyb-3	T06E6.2	p > 0.05, not analyzed	p > 0.05, not analyzed	6936.59	7065.73	5810.8	7363.67	6484.86	6930.31	0.0687483	0.108096	0.635993	0.524781	0.999962
WBGene00000869	cyc-1	C54G4.8	p > 0.05, not analyzed	p > 0.05, not analyzed	2320.98	2454.81	2244.82	2362.87	2143.54	2301.64	-0.0444711	0.100001	-0.444709	0.65653	0.999962
WBGene00000870	cyd-1	Y38F1A.5	p > 0.05, not analyzed	p > 0.05, not analyzed	23.3604	26.1021	43.1738	55.7169	32.997	30.9977	0.348076	0.38752	0.898215	0.369071	0.999962
WBGene00000871	cye-1	C37A2.4	p > 0.05, not analyzed	p > 0.05, not analyzed	1578.12	1614.68	1219.08	1612.37	1513.38	1410.27	0.0405161	0.126835	0.319439	0.749394	0.999962
WBGene00000872	cyk-1	F11H8.4	p > 0.05, not analyzed	p > 0.05, not analyzed	866.992	906.53	733.458	899.76	724.537	755.43	-0.0756012	0.132309	-0.571398	0.56773	0.999962
WBGene00000874	cyk-3	ZK328.1	p > 0.05, not analyzed	p > 0.05, not analyzed	1581.51	1639.39	1276.53	1613.95	1429.27	1307.34	-0.0479097	0.127795	-0.374895	0.707738	0.999962
WBGene00000875	cyk-4	K08E3.6	p > 0.05, not analyzed	p > 0.05, not analyzed	2128.2	2361.95	1957.29	2124.54	1725.9	1796.91	-0.191626	0.118753	-1.61364	0.106605	0.999962
WBGene00000876	cyl-1	C52E4.6	p > 0.05, not analyzed	p > 0.05, not analyzed	1312.98	1232.06	1052.36	1284.95	1219.48	1249.62	0.0624565	0.116086	0.538017	0.590565	0.999962
WBGene00000877	cyn-1	Y49A3A.5	p > 0.05, not analyzed	p > 0.05, not analyzed	964.595	1201.39	1263.37	1201.05	1254.81	1464.96	0.192532	0.130865	1.47123	0.141229	0.999962
WBGene00000878	cyn-2	ZK520.5	p > 0.05, not analyzed	p > 0.05, not analyzed	18.3438	12.7839	18.9135	10.7233	8.87011	8.53341	-0.837383	0.565254	-1.48143	0.138493	0.999962
WBGene00000879	cyn-3	Y75B12B.5	p > 0.05, not analyzed	p > 0.05, not analyzed	2010.71	2079.55	2314.08	2137.39	2430.95	2476.07	0.137358	0.108769	1.26284	0.206646	0.999962
WBGene00000880	cyn-4	F59E10.2	p > 0.05, not analyzed	p > 0.05, not analyzed	1050.93	1158.13	1068	1100.46	1084.87	1073.36	-0.00840467	0.106762	-0.0787237	0.937252	0.999962
WBGene00000881	cyn-5	F31C3.1	p > 0.05, not analyzed	p > 0.05, not analyzed	2092.61	2198.07	2062.45	1961.11	2114.3	2215.32	-0.0137624	0.101151	-0.136058	0.891776	0.999962
WBGene00000882	cyn-6	F42G9.2	p > 0.05, not analyzed	p > 0.05, not analyzed	134.515	115.035	132.379	130.824	126.865	137.409	0.049757	0.196786	0.252849	0.800385	0.999962
WBGene00000883	cyn-7	Y75B12B.2	p > 0.05, not analyzed	p > 0.05, not analyzed	9902.32	10650.6	9911	10920.9	10295.2	10067.8	0.0382315	0.0919119	0.415958	0.677441	0.999962
WBGene00000884	cyn-8	D1009.2	p > 0.05, not analyzed	p > 0.05, not analyzed	393.973	413.796	476.797	505.286	431.472	500.441	0.159296	0.139314	1.14344	0.252858	0.999962
WBGene00000885	cyn-9	T27D1.1	p > 0.05, not analyzed	p > 0.05, not analyzed	556.849	583.955	580.478	591.685	608.453	625.992	0.0853368	0.118714	0.718847	0.472235	0.999962
WBGene00000886	cyn-10	B0252.4	p > 0.05, not analyzed	p > 0.05, not analyzed	463.959	477.596	612.226	488.052	569.463	737.601	0.208214	0.165088	1.26123	0.207225	0.999962
WBGene00000887	cyn-11	T01B7.4	p > 0.05, not analyzed	p > 0.05, not analyzed	466.405	443.697	593.268	493.359	549.821	569.692	0.100365	0.144348	0.695298	0.486868	0.999962
WBGene00000889	cyn-13	Y116A8C.34	p > 0.05, not analyzed	p > 0.05, not analyzed	753.717	705.653	695.642	665.472	732.787	835.742	0.0536014	0.125902	0.425738	0.670299	0.999962
WBGene00000890	sig-7	F39H2.2	p > 0.05, not analyzed	p > 0.05, not analyzed	807.678	908.406	868.201	911.161	973.937	1042.93	0.180324	0.11522	1.56503	0.117575	0.999962
WBGene00000891	cyn-15	Y87G2A.6	p > 0.05, not analyzed	p > 0.05, not analyzed	1038.15	1033.91	1023.01	1148.54	1028.9	1021.36	0.0467613	0.109242	0.428053	0.668613	0.999962
WBGene00000892	cyn-16	Y17G7B.9	p > 0.05, not analyzed	p > 0.05, not analyzed	606.501	636.647	610.224	616.036	626.31	586.898	-0.0192301	0.11805	-0.162898	0.870599	0.999962
WBGene00000893	cyn-17	ZC250.1	p > 0.05, not analyzed	p > 0.05, not analyzed	21.1067	26.0772	25.0119	18.0709	22.3838	16.8401	-0.335442	0.437622	-0.766511	0.443372	0.999962
WBGene00000894	dab-1	M110.5	p > 0.05, not analyzed	p > 0.05, not analyzed	4012.72	4267.81	3359.63	4299.94	3879.25	3861.34	0.0488775	0.113149	0.431975	0.66576	0.999962
WBGene00000895	dac-1	B0412.1	p > 0.05, not analyzed	p > 0.05, not analyzed	4.69922	2.26846	9.01492	5.60804	4.9933	4.81601	-0.0715204	0.890085	-0.0803523	0.935957	0.999962
WBGene00000896	dad-1	F57B10.10	p > 0.05, not analyzed	p > 0.05, not analyzed	748.742	778.416	1038.08	865.836	937.659	1119.79	0.187641	0.147409	1.27293	0.203044	0.999962
WBGene00000897	daf-1	F29C4.1	p > 0.05, not analyzed	p > 0.05, not analyzed	394.993	390.63	332.71	404.96	373.879	391.785	0.0672683	0.139716	0.481464	0.630187	0.999962
WBGene00000898	daf-2	Y55D5A.5	p > 0.05, not analyzed	p > 0.05, not analyzed	2243.3	2337.31	1775.55	2114.31	1942.52	1936.34	-0.0845412	0.120966	-0.698885	0.484624	0.999962
WBGene00000899	daf-3	F25E2.5	p > 0.05, not analyzed	p > 0.05, not analyzed	185.45	183.577	218.497	205.896	201.039	211.452	0.0729954	0.168641	0.432845	0.665127	0.999962
WBGene00000900	daf-4	C05D2.1	p > 0.05, not analyzed	p > 0.05, not analyzed	470.749	486.615	399.489	484.023	537.683	520.674	0.187059	0.134483	1.39095	0.16424	0.999962
WBGene00000901	daf-5	W01G7.1	p > 0.05, not analyzed	p > 0.05, not analyzed	67.8993	63.494	64.6376	53.0645	57.7742	80.4563	-0.0288712	0.274777	-0.105071	0.916319	0.999962
WBGene00000902	daf-6	F31F6.5	p > 0.05, not analyzed	p > 0.05, not analyzed	12.3085	8.73896	25.0208	20.3541	17.2895	15.8562	0.19514	0.531007	0.36749	0.713254	0.999962
WBGene00000903	daf-7	B0412.2	p > 0.05, not analyzed	p > 0.05, not analyzed	18.4381	3.25974	19.176	6.42913	19.1215	3.35385	-0.494675	0.736248	-0.671887	0.501656	0.999962
WBGene00000904	daf-8	R05D11.1	p > 0.05, not analyzed	p > 0.05, not analyzed	115.575	104.419	122.814	112.505	105.059	119.792	-0.0239561	0.208251	-0.115035	0.908418	0.999962
WBGene00000905	daf-9	T13C5.1	p > 0.05, not analyzed	p > 0.05, not analyzed	6.14795	8.70334	11.5154	7.50025	12.153	10.0506	0.166266	0.662359	0.251021	0.801798	0.999962
WBGene00000906	daf-10	F23B2.4	p > 0.05, not analyzed	p > 0.05, not analyzed	9.8499	5.46867	12.5212	10.7121	7.77045	13.3379	0.187433	0.653283	0.286909	0.774182	0.999962
WBGene00000907	daf-11	B0240.3	p > 0.05, not analyzed	p > 0.05, not analyzed	12.3453	6.6769	6.68428	1.95042	9.9954	0	-1.12587	0.968949	-1.16195	0.245254	0.999962
WBGene00000908	daf-12	F11A1.3	p > 0.05, not analyzed	p > 0.05, not analyzed	53.4373	45.0455	55.1892	34.7978	48.5375	50.232	-0.195488	0.309166	-0.632309	0.527185	0.999962
WBGene00000910	daf-14	F01G10.8	p > 0.05, not analyzed	p > 0.05, not analyzed	72.9992	64.7715	106.816	73.4385	87.9426	84.9985	0.00537344	0.258944	0.0207514	0.983444	0.999962
WBGene00000911	daf-15	C10C5.6	p > 0.05, not analyzed	p > 0.05, not analyzed	4162.31	4173.47	3426.04	4086.67	3915.3	3953.01	0.0237876	0.107054	0.222202	0.824157	0.999962
WBGene00000912	daf-16	R13H8.1	p > 0.05, not analyzed	p > 0.05, not analyzed	454.821	447.389	377.341	421.553	479.408	429.354	0.0584197	0.1388	0.420891	0.673834	0.999962
WBGene00000913	daf-18	T07A9.6	p > 0.05, not analyzed	p > 0.05, not analyzed	9342.75	9444.26	7712.43	10001	9364.48	8877.61	0.0920056	0.108381	0.848907	0.395933	0.999962
WBGene00000914	daf-19	F33H1.1	p > 0.05, not analyzed	p > 0.05, not analyzed	161.041	167.722	127.879	170.864	163.907	154.509	0.102451	0.189379	0.540981	0.588521	0.999962
WBGene00000915	hsp-90	C47E8.5	p > 0.05, not analyzed	p > 0.05, not analyzed	41573.1	44560.3	36095.6	45564.8	39808.9	42258.1	0.0624049	0.106788	0.58438	0.558964	0.999962
WBGene00000917	daf-25	Y48G1A.3	p > 0.05, not analyzed	p > 0.05, not analyzed	329.139	382.245	356.779	398.664	380.288	359.117	0.0893401	0.139333	0.641198	0.521394	0.999962
WBGene00000923	daf-31	K07H8.3	p > 0.05, not analyzed	p > 0.05, not analyzed	773.38	837.239	865.818	779.516	957.331	944.314	0.115038	0.123814	0.929122	0.352826	0.999962
WBGene00000928	dao-2	M03A1.7	p > 0.05, not analyzed	p > 0.05, not analyzed	30.2948	30.9425	32.3454	24.68	34.8597	36.0595	0.0354993	0.36864	0.0962978	0.923284	0.999962
WBGene00000929	dao-3	K07E3.3	p > 0.05, not analyzed	p > 0.05, not analyzed	246.672	252.659	272.061	221.863	272.935	275.717	-8.07285e-06	0.159757	-5.0532e-05	0.99996	0.999962
WBGene00000931	dao-5	C25A1.10	p > 0.05, not analyzed	p > 0.05, not analyzed	3680.13	3902.37	3173.68	3762.07	3250.13	3417.42	-0.0444591	0.11149	-0.398771	0.690062	0.999962
WBGene00000933	dap-3	C14A4.2	p > 0.05, not analyzed	p > 0.05, not analyzed	584.453	676.162	606.044	656.963	653.903	663.263	0.0804109	0.120496	0.667333	0.50456	0.999962
WBGene00000934	dat-1	T23G5.5	p > 0.05, not analyzed	p > 0.05, not analyzed	2.46001	4.35747	4.80253	2.1428	5.20138	5.01939	0.0931319	0.998399	0.0932813	0.92568	0.999962
WBGene00000935	daz-1	F56D1.7	p > 0.05, not analyzed	p > 0.05, not analyzed	1807.92	1872.96	1324.17	1794.63	1502.08	1588.37	-0.0346591	0.137199	-0.252619	0.800562	0.999962
WBGene00000936	dbl-1	T25F10.2	p > 0.05, not analyzed	p > 0.05, not analyzed	11.0645	17.3957	6.71439	6.42896	10.4236	8.38019	-0.464325	0.656329	-0.707458	0.479282	0.999962
WBGene00000937	dbr-1	C55B7.8	p > 0.05, not analyzed	p > 0.05, not analyzed	703.123	724.816	706.681	694.343	695.264	660.655	-0.0585465	0.114002	-0.513556	0.607562	0.999962
WBGene00000938	dcp-66	C26C6.5	p > 0.05, not analyzed	p > 0.05, not analyzed	1019.6	1035.62	814.915	892.297	1006.5	942.124	-0.0129994	0.12633	-0.102901	0.918042	0.999962
WBGene00000939	dcr-1	K12H4.8	p > 0.05, not analyzed	p > 0.05, not analyzed	3128.83	3207.48	2394.7	3142.63	2842.8	2684.74	-0.00990171	0.125619	-0.0788232	0.937173	0.999962
WBGene00000940	dcs-1	Y113G7A.9	p > 0.05, not analyzed	p > 0.05, not analyzed	385.603	352.019	367.27	388.41	321.205	375.917	-0.0260808	0.142663	-0.182814	0.854944	0.999962
WBGene00000941	ddp-1	Y39A3CR.4	p > 0.05, not analyzed	p > 0.05, not analyzed	251.693	364.474	436.573	331.581	347.472	473.62	0.128347	0.193803	0.662254	0.507808	0.999962
WBGene00000942	deb-1	ZC477.9	p > 0.05, not analyzed	p > 0.05, not analyzed	352.895	240.195	315.806	258.131	225.804	256.997	-0.292238	0.170909	-1.7099	0.0872846	0.999962
WBGene00000950	deg-1	C47C12.6	p > 0.05, not analyzed	p > 0.05, not analyzed	3.65895	9.68739	9.46196	9.83821	10.6723	5.79649	0.182308	0.721699	0.25261	0.80057	0.999962
WBGene00000951	deg-3	K03B8.9	p > 0.05, not analyzed	p > 0.05, not analyzed	3.69336	2.17926	4.805	2.14532	12.0789	7.54357	1.03733	0.931895	1.11314	0.265648	0.999962
WBGene00000953	del-2	F58G6.6	p > 0.05, not analyzed	p > 0.05, not analyzed	3.50926	5.17916	14.6138	7.76295	15.3581	8.75367	0.421544	0.721113	0.584575	0.558834	0.999962
WBGene00000955	des-2	T26H10.1	p > 0.05, not analyzed	p > 0.05, not analyzed	17.6421	10.7546	10.82	5.48721	9.70923	19.5927	-0.140602	0.619823	-0.226842	0.820546	0.999962
WBGene00000958	dgk-1	C09E10.2	p > 0.05, not analyzed	p > 0.05, not analyzed	29.6573	35.792	34.2614	24.7142	31.9516	26.5996	-0.258284	0.371591	-0.695078	0.487007	0.999962
WBGene00000959	dgk-2	F46H6.2	p > 0.05, not analyzed	p > 0.05, not analyzed	174.148	152.872	175.033	179.011	162.331	188.599	0.0786591	0.178744	0.440066	0.659889	0.999962
WBGene00000960	dgk-3	F54G8.2	p > 0.05, not analyzed	p > 0.05, not analyzed	3.69169	3.27404	4.80857	6.42788	2.5959	5.01136	0.234849	0.963964	0.243628	0.807519	0.999962
WBGene00000961	dgn-1	T21B6.1	p > 0.05, not analyzed	p > 0.05, not analyzed	88.798	90.8586	75.5145	97.5077	89.5447	75.6473	0.0402163	0.237735	0.169164	0.865667	0.999962
WBGene00000962	dhc-1	T21E12.4	p > 0.05, not analyzed	p > 0.05, not analyzed	15641.7	16064	12622.5	15469.9	14077.7	15025.2	0.00799938	0.110936	0.0721081	0.942516	0.999962
WBGene00000963	dhp-1	R06C7.3	p > 0.05, not analyzed	p > 0.05, not analyzed	132.815	127.131	193.957	125.448	130.535	103.25	-0.344104	0.219424	-1.56822	0.116831	0.999962
WBGene00000964	dhp-2	C47E12.8	p > 0.05, not analyzed	p > 0.05, not analyzed	79.9057	46.7397	69.0508	54.6468	57.3437	48.6154	-0.283294	0.290403	-0.975518	0.329303	0.999962
WBGene00000965	dhs-1	C01G8.3	p > 0.05, not analyzed	p > 0.05, not analyzed	740.358	666.317	702.511	758.781	764.033	783.74	0.129814	0.114615	1.13261	0.257378	0.999962
WBGene00000966	dhs-2	F55A12.4	p > 0.05, not analyzed	p > 0.05, not analyzed	42.753	30.5042	20.6727	24.1617	17.281	28.1847	-0.423992	0.42181	-1.00517	0.314814	0.999962
WBGene00000968	dhs-4	T05F1.10	p > 0.05, not analyzed	p > 0.05, not analyzed	9.81469	7.5489	12.3992	3.21556	3.50357	9.28502	-0.879582	0.760039	-1.15729	0.247156	0.999962
WBGene00000969	dhs-5	F56D1.5	p > 0.05, not analyzed	p > 0.05, not analyzed	55.2709	33.5802	44.9672	45.0098	58.4176	63.0569	0.325141	0.312698	1.03979	0.298437	0.999962
WBGene00000970	dhs-6	C17G10.8	p > 0.05, not analyzed	p > 0.05, not analyzed	1041.9	1002.25	1105.12	1056.6	1139.76	1001.83	0.0218374	0.111584	0.195704	0.844842	0.999962
WBGene00000971	dhs-7	E04F6.7	p > 0.05, not analyzed	p > 0.05, not analyzed	20.8781	15.1595	23.9124	23.5769	26.1673	28.5955	0.385907	0.429759	0.89796	0.369207	0.999962
WBGene00000972	dhs-8	K10H10.3	p > 0.05, not analyzed	p > 0.05, not analyzed	23.5262	26.9814	42.813	25.8129	27.2842	32.8187	-0.130338	0.392484	-0.332084	0.739826	0.999962
WBGene00000973	dhs-9	Y32H12A.3	p > 0.05, not analyzed	p > 0.05, not analyzed	116.536	144.442	158.278	129.697	107.785	124.976	-0.21628	0.206024	-1.04978	0.293819	0.999962
WBGene00000974	dhs-11	Y39A1A.11	p > 0.05, not analyzed	p > 0.05, not analyzed	204.357	224.685	222.668	235.72	259.672	292.063	0.273437	0.162029	1.68759	0.0914905	0.999962
WBGene00000975	dhs-12	K08F4.9	p > 0.05, not analyzed	p > 0.05, not analyzed	710.086	728.117	900.913	768.389	865.616	813.375	0.0641743	0.129024	0.497382	0.61892	0.999962
WBGene00000976	dhs-13	F36H9.3	p > 0.05, not analyzed	p > 0.05, not analyzed	325.461	362.782	258.272	345.079	274.728	299.384	-0.042182	0.166362	-0.253556	0.799838	0.999962
WBGene00000977	dhs-14	R05D8.8	p > 0.05, not analyzed	p > 0.05, not analyzed	121.317	141.72	137.871	123.284	105.589	94.9133	-0.314634	0.208056	-1.51225	0.130469	0.999962
WBGene00000979	dhs-16	C10F3.2	p > 0.05, not analyzed	p > 0.05, not analyzed	2.45657	1.08339	4.78423	5.35828	5.23064	5.88454	0.963258	1.01294	0.950952	0.341629	0.999962
WBGene00000980	dhs-17	F29G9.6	p > 0.05, not analyzed	p > 0.05, not analyzed	153.751	173.993	135.208	147.701	164.895	143.951	-0.0176862	0.190306	-0.0929353	0.925955	0.999962
WBGene00000981	dhs-18	C45B11.3	p > 0.05, not analyzed	p > 0.05, not analyzed	111.563	95.7164	129.467	88.9733	101.012	74.4615	-0.351952	0.231506	-1.52027	0.128443	0.999962
WBGene00000982	dhs-19	T11F9.11	p > 0.05, not analyzed	p > 0.05, not analyzed	211.708	202.118	305.337	273.618	267.186	306.658	0.233181	0.180304	1.29327	0.195919	0.999962
WBGene00000983	dhs-20	F35B12.2	p > 0.05, not analyzed	p > 0.05, not analyzed	27.0312	22.7807	26.8158	27.8615	36.5661	26.8699	0.25487	0.390182	0.653206	0.513623	0.999962
WBGene00000984	dhs-21	R11D1.11	p > 0.05, not analyzed	p > 0.05, not analyzed	75.9892	63.3861	98.9322	80.4007	106.396	105.021	0.291475	0.250667	1.1628	0.244912	0.999962
WBGene00000985	dhs-22	C15H11.4	p > 0.05, not analyzed	p > 0.05, not analyzed	1471.63	1660.4	1825.84	1727.71	1967.26	2129.74	0.232254	0.120861	1.92166	0.054649	0.999962
WBGene00000986	dhs-23	R08H2.1	p > 0.05, not analyzed	p > 0.05, not analyzed	13.4872	10.7596	9.52272	6.43169	5.26767	5.07483	-1.00987	0.69884	-1.44507	0.148439	0.999962
WBGene00000987	dhs-24	Y60A3A.10	p > 0.05, not analyzed	p > 0.05, not analyzed	630.833	675.825	628.698	693.227	630.004	664.817	0.0381057	0.118407	0.32182	0.747589	0.999962
WBGene00000989	dhs-26	ZK816.5	p > 0.05, not analyzed	p > 0.05, not analyzed	9.81989	12.9676	11.4618	12.8612	15.7328	35.3871	0.90934	0.554814	1.639	0.101213	0.999962
WBGene00000990	dhs-27	C04F6.5	p > 0.05, not analyzed	p > 0.05, not analyzed	88.3384	71.1946	76.3172	71.8135	91.9432	82.7011	0.0698241	0.244415	0.285678	0.775124	0.999962
WBGene00000992	dhs-29	F27D9.6	p > 0.05, not analyzed	p > 0.05, not analyzed	45.4538	30.3537	47.8628	41.7935	30.4928	33.6076	-0.230702	0.34728	-0.664311	0.506491	0.999962
WBGene00000993	dhs-30	T25G12.7	p > 0.05, not analyzed	p > 0.05, not analyzed	263.767	336.451	284.22	288.329	295.189	327.52	0.0429138	0.154878	0.277081	0.781718	0.999962
WBGene00000994	ints-6	F08B4.1	p > 0.05, not analyzed	p > 0.05, not analyzed	986.53	1035.83	997.815	1072.65	1022.69	1000.21	0.0349469	0.106876	0.326985	0.743679	0.999962
WBGene00000995	die-1	C18D1.1	p > 0.05, not analyzed	p > 0.05, not analyzed	387.675	305.831	249.184	280.019	286.58	331.494	-0.062669	0.173957	-0.360256	0.718656	0.999962
WBGene00000996	dif-1	F49E8.5	p > 0.05, not analyzed	p > 0.05, not analyzed	796.55	897.107	816.335	875.117	868.307	841.487	0.0419468	0.112913	0.371495	0.710269	0.999962
WBGene00000998	dig-1	K07E12.1	p > 0.05, not analyzed	p > 0.05, not analyzed	2287.7	1806.13	1688.8	1236.98	1846.21	841.155	-0.559151	0.349695	-1.59897	0.109828	0.999962
WBGene00001000	dim-1	C18A11.7	p > 0.05, not analyzed	p > 0.05, not analyzed	608.724	462.51	455.365	334.917	457.676	438.694	-0.305519	0.161389	-1.89306	0.0583495	0.999962
WBGene00001001	dis-3	C04G2.6	p > 0.05, not analyzed	p > 0.05, not analyzed	1723.3	1825.78	1587.15	1927.19	1803.74	1773.86	0.0999689	0.105183	0.950427	0.341896	0.999962
WBGene00001002	div-1	R01H10.1	p > 0.05, not analyzed	p > 0.05, not analyzed	843.596	1033.99	805.375	982.513	880.684	898.33	0.0412192	0.127241	0.323947	0.745978	0.999962
WBGene00001005	dlc-1	T26A5.9	p > 0.05, not analyzed	p > 0.05, not analyzed	1816.64	2128.11	2232.02	2179.78	2205.18	2450.1	0.145595	0.112872	1.28991	0.197082	0.999962
WBGene00001006	dlg-1	C25F6.2	p > 0.05, not analyzed	p > 0.05, not analyzed	538.075	518.525	476.829	528.1	591.308	487.588	0.0687942	0.132323	0.519896	0.603136	0.999962
WBGene00001007	dli-1	C39E9.14	p > 0.05, not analyzed	p > 0.05, not analyzed	775.882	860.626	631.144	814.731	704.122	807.504	0.037647	0.137193	0.27441	0.783769	0.999962
WBGene00001008	dlk-1	F33E2.2	p > 0.05, not analyzed	p > 0.05, not analyzed	178.013	210.674	222.523	201.336	238.445	162.048	-0.0272742	0.187956	-0.145109	0.884625	0.999962
WBGene00001016	dna-2	F43G6.1	p > 0.05, not analyzed	p > 0.05, not analyzed	1822.12	1859.97	1360.72	1944.26	1563.99	1535.87	0.000402249	0.139534	0.00288279	0.9977	0.999962
WBGene00001017	dnc-1	ZK593.5	p > 0.05, not analyzed	p > 0.05, not analyzed	2259.42	2393.67	1808.88	2291.26	2053.08	2022.98	-0.0210887	0.122532	-0.172108	0.863353	0.999962
WBGene00001018	dnc-2	C28H8.12	p > 0.05, not analyzed	p > 0.05, not analyzed	843.254	891.404	1134.61	1009.61	1011.41	1197.41	0.164672	0.136256	1.20856	0.226833	0.999962
WBGene00001019	dnj-1	B0035.14	p > 0.05, not analyzed	p > 0.05, not analyzed	818.688	871.59	750.832	852.925	841.198	776.296	0.0173288	0.117458	0.147532	0.882712	0.999962
WBGene00001020	dnj-2	B0035.2	p > 0.05, not analyzed	p > 0.05, not analyzed	504.683	524.86	644.415	537.996	679.884	680.756	0.18145	0.144678	1.25416	0.209782	0.999962
WBGene00001021	dnj-3	C01G10.12	p > 0.05, not analyzed	p > 0.05, not analyzed	79.3815	99.6364	145.12	96.5231	118.595	142.3	0.13671	0.249038	0.548953	0.583038	0.999962
WBGene00001022	dnj-4	C01G8.4	p > 0.05, not analyzed	p > 0.05, not analyzed	218.463	225.104	262.967	232.733	256.666	256.913	0.0777199	0.160365	0.484643	0.62793	0.999962
WBGene00001023	dnj-5	C04A2.7	p > 0.05, not analyzed	p > 0.05, not analyzed	3211.81	3238.55	2651.33	3336.6	2996.39	3239.59	0.0730645	0.11085	0.659128	0.509814	0.999962
WBGene00001025	dnj-7	C55B6.2	p > 0.05, not analyzed	p > 0.05, not analyzed	451.35	459.467	395.581	422.142	405.061	393.372	-0.0973807	0.13436	-0.724775	0.46859	0.999962
WBGene00001026	dnj-8	C56C10.13	p > 0.05, not analyzed	p > 0.05, not analyzed	1353.81	1225.16	1070.79	1234.12	1205.56	1144.54	-0.0252412	0.117989	-0.213928	0.830603	0.999962
WBGene00001027	dnj-9	F11G11.7	p > 0.05, not analyzed	p > 0.05, not analyzed	1050.47	1118.99	893.385	1097.11	1039.21	1063.1	0.0636042	0.11881	0.535343	0.592413	0.999962
WBGene00001028	dnj-10	F22B7.5	p > 0.05, not analyzed	p > 0.05, not analyzed	683.33	696.325	655.637	757.887	669.064	671.229	0.0430422	0.119154	0.361232	0.717926	0.999962
WBGene00001029	dnj-11	F38A5.13	p > 0.05, not analyzed	p > 0.05, not analyzed	3546.04	3674.18	3096.52	3618.13	3571	3426.78	0.0414595	0.102745	0.403518	0.686567	0.999962
WBGene00001030	dnj-12	F39B2.10	p > 0.05, not analyzed	p > 0.05, not analyzed	1000.42	1184.81	800.613	1019.51	843.684	989.523	-0.0654307	0.145389	-0.45004	0.652681	0.999962
WBGene00001031	dnj-13	F54D5.8	p > 0.05, not analyzed	p > 0.05, not analyzed	2105.64	2182.31	1726.94	2187.19	1833.84	2072.66	0.0190124	0.120882	0.157281	0.875023	0.999962
WBGene00001032	dnj-14	K02G10.8	p > 0.05, not analyzed	p > 0.05, not analyzed	117.867	140.535	123.281	104.98	132.821	145.706	0.0108788	0.208738	0.0521172	0.958435	0.999962
WBGene00001033	dnj-15	K08D10.2	p > 0.05, not analyzed	p > 0.05, not analyzed	244.55	284.292	374.351	285.243	374.522	392.721	0.219069	0.180868	1.21121	0.225814	0.999962
WBGene00001034	dnj-16	R74.4	p > 0.05, not analyzed	p > 0.05, not analyzed	923.211	972.116	1176.16	974.655	1196.65	1239.92	0.151249	0.133864	1.12987	0.258531	0.999962
WBGene00001035	dnj-17	T03F6.2	p > 0.05, not analyzed	p > 0.05, not analyzed	625.524	690.446	611.335	724.377	703.794	623.472	0.0894265	0.12405	0.720894	0.470975	0.999962
WBGene00001036	dnj-18	T04A8.9	p > 0.05, not analyzed	p > 0.05, not analyzed	262.139	303.391	354.296	287.321	324.298	323.3	0.0213298	0.157572	0.135365	0.892323	0.999962
WBGene00001037	dnj-19	T05C3.5	p > 0.05, not analyzed	p > 0.05, not analyzed	3076	3447.89	2907.19	3379.71	3072.68	3318.75	0.0510986	0.104774	0.487704	0.62576	0.999962
WBGene00001038	dnj-20	T15H9.7	p > 0.05, not analyzed	p > 0.05, not analyzed	702.418	627.653	579.862	637.732	636.937	652.07	0.014794	0.123779	0.119519	0.904864	0.999962
WBGene00001039	dnj-21	T19B4.4	p > 0.05, not analyzed	p > 0.05, not analyzed	118.783	131.081	149.787	111.594	131.093	192.474	0.124064	0.225995	0.548966	0.583028	0.999962
WBGene00001040	dnj-22	T23B12.7	p > 0.05, not analyzed	p > 0.05, not analyzed	879.153	815.686	978.074	870.418	994.577	1148.47	0.173579	0.131743	1.31755	0.187653	0.999962
WBGene00001041	dnj-23	T24H10.3	p > 0.05, not analyzed	p > 0.05, not analyzed	758.034	898.704	804.562	886.45	885.353	935.897	0.137392	0.116624	1.17807	0.238767	0.999962
WBGene00001042	dnj-24	W03A5.7	p > 0.05, not analyzed	p > 0.05, not analyzed	66.5677	53.2589	59.7695	52.7089	54.2796	62.6503	-0.0772743	0.277505	-0.278461	0.780658	0.999962
WBGene00001043	dnj-25	W07A8.3	p > 0.05, not analyzed	p > 0.05, not analyzed	1003.23	1125.02	912.381	1227.43	984.82	986.546	0.0718939	0.130191	0.552218	0.580799	0.999962
WBGene00001044	dnj-26	Y39C12A.8	p > 0.05, not analyzed	p > 0.05, not analyzed	352.453	404.893	537.475	496.191	538.284	582.945	0.318418	0.159127	2.00103	0.0453889	0.999962
WBGene00001045	dnj-27	Y47H9C.5	p > 0.05, not analyzed	p > 0.05, not analyzed	328.522	364.408	312.708	278.877	329.918	379.992	-0.0227125	0.157148	-0.14453	0.885082	0.999962
WBGene00001046	dnj-28	Y54E10BL.4	p > 0.05, not analyzed	p > 0.05, not analyzed	192.977	186.86	142.844	153.229	143.437	136.69	-0.268052	0.191716	-1.39818	0.16206	0.999962
WBGene00001047	dnj-29	Y63D3A.6	p > 0.05, not analyzed	p > 0.05, not analyzed	1992.89	2133.33	1694.01	2052.89	1816.51	1858.01	-0.0231001	0.116267	-0.198681	0.842512	0.999962
WBGene00001048	dnj-30	Y71F9B.16	p > 0.05, not analyzed	p > 0.05, not analyzed	510.552	520.533	557.213	445.469	592.386	660.779	0.0970845	0.151133	0.642379	0.520627	0.999962
WBGene00001049	dog-1	F33H2.1	p > 0.05, not analyzed	p > 0.05, not analyzed	225.271	236.057	167.498	226.033	204.788	252.765	0.124417	0.181274	0.686348	0.492494	0.999962
WBGene00001050	dom-3	F54C1.2	p > 0.05, not analyzed	p > 0.05, not analyzed	446.953	520.457	469.402	483.342	538.575	496.535	0.0798182	0.130467	0.61179	0.540677	0.999962
WBGene00001051	cks-1	C09G4.3	p > 0.05, not analyzed	p > 0.05, not analyzed	750.757	859.214	777.029	850.37	957.664	898.184	0.18129	0.117032	1.54906	0.121367	0.999962
WBGene00001052	dop-1	F15A8.5	p > 0.05, not analyzed	p > 0.05, not analyzed	5.87646	0	7.05163	9.62259	9.96922	5.82217	0.978519	0.889867	1.09962	0.271496	0.999962
WBGene00001053	dop-2	K09G1.4	p > 0.05, not analyzed	p > 0.05, not analyzed	16.4005	8.20121	20.965	14.8041	8.71684	12.8192	-0.338143	0.572215	-0.590937	0.554563	0.999962
WBGene00001054	dpf-1	T23F1.7	p > 0.05, not analyzed	p > 0.05, not analyzed	32.6957	39.276	21.7648	25.063	26.3722	20.7663	-0.373453	0.403757	-0.924944	0.354995	0.999962
WBGene00001055	dpf-2	C27C12.7	p > 0.05, not analyzed	p > 0.05, not analyzed	436.847	422.34	567.4	428.526	538.231	617.247	0.151208	0.162826	0.928649	0.353071	0.999962
WBGene00001056	dpf-3	K02F2.1	p > 0.05, not analyzed	p > 0.05, not analyzed	3914.65	4119.88	3311.81	4217.22	3845.11	3836.93	0.0687547	0.110068	0.624657	0.532196	0.999962
WBGene00001057	dpf-4	F01F1.5	p > 0.05, not analyzed	p > 0.05, not analyzed	1058.85	1204.33	1021.36	1177.43	1002.21	990.565	-0.0520262	0.121247	-0.429092	0.667856	0.999962
WBGene00001058	dpf-5	R11E3.8	p > 0.05, not analyzed	p > 0.05, not analyzed	1890.81	1981.4	1443.64	2087.77	1577.85	1632.76	-0.00487014	0.142451	-0.0341882	0.972727	0.999962
WBGene00001059	dpf-6	F44B9.1	p > 0.05, not analyzed	p > 0.05, not analyzed	42.7602	44.4305	73.643	38.6536	40.0188	32.6335	-0.539456	0.331948	-1.62512	0.104136	0.999962
WBGene00001060	dpf-7	R11E3.7	p > 0.05, not analyzed	p > 0.05, not analyzed	961.192	943.533	764.226	1073.7	864.098	899.96	0.0885521	0.133269	0.66446	0.506396	0.999962
WBGene00001061	dpl-1	T23G7.1	p > 0.05, not analyzed	p > 0.05, not analyzed	1429.49	1512.89	1142.52	1455.94	1390.59	1400.52	0.0568695	0.122552	0.464043	0.642617	0.999962
WBGene00001063	dpy-1	M01E10.2	p > 0.05, not analyzed	p > 0.05, not analyzed	10.0296	0.963792	12.6053	4.71568	4.02142	7.87635	-0.478445	0.867868	-0.551288	0.581436	0.999962
WBGene00001064	dpy-2	T14B4.6	p > 0.05, not analyzed	p > 0.05, not analyzed	55.27	51.9919	66.0127	47.1532	60.1652	30.269	-0.337874	0.319171	-1.0586	0.289782	0.999962
WBGene00001065	dpy-3	EGAP7.1	p > 0.05, not analyzed	p > 0.05, not analyzed	33.1057	31.2053	41.9023	31.0864	28.092	21.9894	-0.39848	0.373791	-1.06605	0.286401	0.999962
WBGene00001067	dpy-5	F27C1.8	p > 0.05, not analyzed	p > 0.05, not analyzed	11.026	8.5807	18.0536	10.7207	2.64237	5.08906	-1.06616	0.715201	-1.49072	0.136036	0.999962
WBGene00001068	dpy-6	F16F9.2	p > 0.05, not analyzed	p > 0.05, not analyzed	9.85113	2.18856	12.5255	4.28472	10.3554	19.1648	0.471029	0.74481	0.632415	0.527116	0.999962
WBGene00001069	dpy-7	F46C8.6	p > 0.05, not analyzed	p > 0.05, not analyzed	61.37	38.8922	64.938	38.584	48.0861	32.8674	-0.467519	0.325394	-1.43678	0.150782	0.999962
WBGene00001071	dpy-9	T21D12.2	p > 0.05, not analyzed	p > 0.05, not analyzed	3.55777	2.08474	7.37548	11.3976	3.3872	6.00031	0.641982	0.897483	0.715313	0.474415	0.999962
WBGene00001072	dpy-10	T14B4.7	p > 0.05, not analyzed	p > 0.05, not analyzed	84.8063	80.3736	92.0184	103.939	111.3	76.3281	0.176912	0.239204	0.739584	0.459553	0.999962
WBGene00001073	dpy-11	F46E10.9	p > 0.05, not analyzed	p > 0.05, not analyzed	425.333	392.283	334.928	445.025	401.96	408.35	0.124836	0.142622	0.875294	0.381414	0.999962
WBGene00001074	dpy-13	F30B5.1	p > 0.05, not analyzed	p > 0.05, not analyzed	3.6791	2.15363	20.0088	11.7911	1.75446	5.07125	-0.51975	0.909177	-0.571671	0.567545	0.999962
WBGene00001075	dpy-14	H27M09.4	p > 0.05, not analyzed	p > 0.05, not analyzed	463.742	413.024	489.285	355.856	527.299	359.59	-0.135485	0.166042	-0.815969	0.414518	0.999962
WBGene00001076	dpy-17	F54D8.1	p > 0.05, not analyzed	p > 0.05, not analyzed	575.555	468.563	563.178	394.425	592.29	392.107	-0.219836	0.168514	-1.30456	0.192043	0.999962
WBGene00001077	dpy-18	Y47D3B.10	p > 0.05, not analyzed	p > 0.05, not analyzed	222.561	199.108	190.977	218.578	179.673	203.507	-0.0255868	0.171148	-0.149501	0.881158	0.999962
WBGene00001078	dpy-19	F22B7.10	p > 0.05, not analyzed	p > 0.05, not analyzed	126.702	132.951	123.936	128.566	145.585	141.335	0.117619	0.193531	0.607752	0.543352	0.999962
WBGene00001080	dpy-21	Y59A8B.1	p > 0.05, not analyzed	p > 0.05, not analyzed	376.023	485.221	375.592	443.885	445.142	374.957	0.0310206	0.150873	0.205607	0.837098	0.999962
WBGene00001081	dpy-22	F47A4.2	p > 0.05, not analyzed	p > 0.05, not analyzed	1253.19	1259.75	1226.01	1182.43	1257.21	1245.98	-0.0201582	0.102857	-0.195982	0.844624	0.999962
WBGene00001082	dpy-23	R160.1	p > 0.05, not analyzed	p > 0.05, not analyzed	297.699	300.067	282.026	344.979	342.084	319.256	0.193905	0.142335	1.36231	0.173099	0.999962
WBGene00001085	dpy-26	C25G4.5	p > 0.05, not analyzed	p > 0.05, not analyzed	2733.83	2765.83	2160.48	2735.77	2504.6	2485.13	0.0125534	0.117751	0.106609	0.915099	0.999962
WBGene00001086	dpy-27	R13G10.1	p > 0.05, not analyzed	p > 0.05, not analyzed	880.68	879.653	851.403	769.069	828.39	775.024	-0.137985	0.111006	-1.24304	0.213854	0.999962
WBGene00001087	dpy-28	Y39A1B.3	p > 0.05, not analyzed	p > 0.05, not analyzed	1777.17	1789.14	1426.58	1672.07	1592.02	1653.12	-0.0213242	0.116267	-0.183408	0.854478	0.999962
WBGene00001088	dpy-30	ZK863.6	p > 0.05, not analyzed	p > 0.05, not analyzed	882.004	964.906	857.913	956.759	936.624	1027.28	0.111159	0.113021	0.983527	0.325348	0.999962
WBGene00001089	dre-1	K04A8.6	p > 0.05, not analyzed	p > 0.05, not analyzed	433.724	389.253	352.746	390.643	425.407	370.619	0.0157303	0.142083	0.110712	0.911845	0.999962
WBGene00001090	drh-1	F15B10.2	p > 0.05, not analyzed	p > 0.05, not analyzed	1303.75	1337.36	1057.19	1362.06	1238.44	1212.01	0.0442366	0.122	0.362594	0.716908	0.999962
WBGene00001091	drh-2	C01B10.1	p > 0.05, not analyzed	p > 0.05, not analyzed	203.108	158.448	135.722	160.688	144.317	150.171	-0.123443	0.197857	-0.623902	0.532692	0.999962
WBGene00001092	dro-1	F53A2.5	p > 0.05, not analyzed	p > 0.05, not analyzed	669.406	819.639	890.191	813.618	961.643	1038.92	0.241647	0.138758	1.7415	0.0815956	0.999962
WBGene00001093	drp-1	T12E12.4	p > 0.05, not analyzed	p > 0.05, not analyzed	2313.97	2314.43	1914.45	2374.57	2195.84	2184.35	0.0462987	0.111084	0.416791	0.676831	0.999962
WBGene00001094	dars-1	B0464.1	p > 0.05, not analyzed	p > 0.05, not analyzed	2465.02	2681.48	2356.02	2796.58	2549.95	2530.51	0.0700727	0.102879	0.681118	0.495797	0.999962
WBGene00001095	dars-2	F10C2.6	p > 0.05, not analyzed	p > 0.05, not analyzed	425.482	488.673	454.987	456.436	455.55	446.254	-0.0124881	0.129424	-0.0964903	0.923131	0.999962
WBGene00001101	dsh-1	C34F11.9	p > 0.05, not analyzed	p > 0.05, not analyzed	264.979	314.9	271.764	311.551	327.449	328.093	0.183745	0.147866	1.24265	0.213996	0.999962
WBGene00001102	dsh-2	C27A2.6	p > 0.05, not analyzed	p > 0.05, not analyzed	1511.05	1519.91	1284.65	1585.56	1401.23	1542.96	0.0702847	0.113795	0.617644	0.53681	0.999962
WBGene00001103	dsl-1	W09G12.4	p > 0.05, not analyzed	p > 0.05, not analyzed	9.79636	10.707	18.0313	15.01	11.4711	11.0437	-0.0582155	0.574966	-0.10125	0.919352	0.999962
WBGene00001104	dsl-2	W09G12.1	p > 0.05, not analyzed	p > 0.05, not analyzed	117.756	136.869	189.716	129.698	134.979	181.586	0.00328499	0.222013	0.0147964	0.988195	0.999962
WBGene00001105	dsl-3	Y41D4B.10	p > 0.05, not analyzed	p > 0.05, not analyzed	18.814	19.6883	17.0208	6.39362	15.5046	7.91691	-0.915356	0.559504	-1.63601	0.101837	0.999962
WBGene00001108	dsl-6	H02I12.4	p > 0.05, not analyzed	p > 0.05, not analyzed	15.9457	12.931	15.2524	8.57509	18.4083	10.1361	-0.239748	0.562864	-0.425943	0.670149	0.999962
WBGene00001110	duo-1	F38B7.5	p > 0.05, not analyzed	p > 0.05, not analyzed	985.855	969.793	799.57	996.29	852.581	816.348	-0.0479784	0.129692	-0.36994	0.711427	0.999962
WBGene00001112	duo-3	Y106G6H.12	p > 0.05, not analyzed	p > 0.05, not analyzed	1485.84	1487.58	1412.53	1670.99	1529.28	1526.15	0.107569	0.102932	1.04504	0.296004	0.999962
WBGene00001113	dur-1	F25H8.5	p > 0.05, not analyzed	p > 0.05, not analyzed	32.7702	25.5333	35.2669	27.0696	40.41	23.3888	-0.0508901	0.386099	-0.131806	0.895138	0.999962
WBGene00001115	dyb-1	F47G6.1	p > 0.05, not analyzed	p > 0.05, not analyzed	84.7897	55.601	57.6768	71.4512	66.1801	53.3114	-0.0470822	0.281171	-0.167451	0.867015	0.999962
WBGene00001116	dyc-1	C33G3.1	p > 0.05, not analyzed	p > 0.05, not analyzed	24.6539	29.6095	18.0595	21.4534	36.413	25.1059	0.210324	0.420967	0.49962	0.617343	0.999962
WBGene00001117	dyf-1	F54C1.5	p > 0.05, not analyzed	p > 0.05, not analyzed	16.6227	6.68492	13.7504	11.7304	11.1214	10.2551	-0.158253	0.602102	-0.262834	0.792679	0.999962
WBGene00001118	dyf-2	ZK520.3	p > 0.05, not analyzed	p > 0.05, not analyzed	15.7593	17.636	21.2582	19.3442	31.6902	17.1812	0.316727	0.465475	0.680439	0.496227	0.999962
WBGene00001119	dyf-3	C04C3.5	p > 0.05, not analyzed	p > 0.05, not analyzed	72.3099	71.0666	49.4276	62.0861	53.1103	56.0391	-0.168388	0.280448	-0.600427	0.548222	0.999962
WBGene00001121	dyf-5	M04C9.5	p > 0.05, not analyzed	p > 0.05, not analyzed	8.05171	7.43933	10.7713	7.01672	5.96631	3.9185	-0.659943	0.750941	-0.878821	0.379499	0.999962
WBGene00001122	dyf-6	F46F6.4	p > 0.05, not analyzed	p > 0.05, not analyzed	11.4643	5.04528	8.45217	2.5027	5.87322	4.36407	-0.930936	0.820189	-1.13503	0.256365	0.999962
WBGene00001123	dyf-7	C43C3.3	p > 0.05, not analyzed	p > 0.05, not analyzed	15.9869	15.2392	16.3197	5.35719	18.2194	10.0458	-0.483373	0.580483	-0.832707	0.40501	0.999962
WBGene00001127	dyf-11	C02H7.1	p > 0.05, not analyzed	p > 0.05, not analyzed	4.91746	6.52279	9.59138	6.42899	2.60613	3.35234	-0.79941	0.866897	-0.922151	0.35645	0.999962
WBGene00001130	dyn-1	C02C6.1	p > 0.05, not analyzed	p > 0.05, not analyzed	442.168	429.617	347.82	466.171	415.957	453.776	0.133347	0.142672	0.934645	0.349971	0.999962
WBGene00001131	dys-1	F15D3.1	p > 0.05, not analyzed	p > 0.05, not analyzed	616.021	403.224	470.286	347.242	518.924	406.238	-0.219647	0.177828	-1.23517	0.216769	0.999962
WBGene00001134	eat-3	D2013.5	p > 0.05, not analyzed	p > 0.05, not analyzed	2485.52	2561.2	2128.75	2570.96	2385.14	2297.74	0.0157952	0.109565	0.144163	0.885372	0.999962
WBGene00001135	eat-4	ZK512.6	p > 0.05, not analyzed	p > 0.05, not analyzed	16.9346	9.48803	17.952	7.37411	20.4445	13.976	-0.0793413	0.568085	-0.139664	0.888925	0.999962
WBGene00001136	eat-5	F13G3.8	p > 0.05, not analyzed	p > 0.05, not analyzed	3.6866	5.427	7.66462	2.14314	8.70125	8.39269	0.203189	0.85054	0.238894	0.811188	0.999962
WBGene00001137	eat-6	B0365.3	p > 0.05, not analyzed	p > 0.05, not analyzed	7540.09	7304.63	5977.6	7678.64	6492.64	6923.87	0.0188576	0.115204	0.163689	0.869976	0.999962
WBGene00001145	eat-16	C16C2.2	p > 0.05, not analyzed	p > 0.05, not analyzed	102.119	85.0705	91.3217	73.9212	88.3227	90.2547	-0.135481	0.232728	-0.582143	0.56047	0.999962
WBGene00001147	eat-18	Y105E8A.7	p > 0.05, not analyzed	p > 0.05, not analyzed	17.385	13.6857	9.53393	0	8.14046	21.4854	-1.137	1.48567	-0.765313	0.444085	0.999962
WBGene00001148	eat-20	H30A04.1	p > 0.05, not analyzed	p > 0.05, not analyzed	202.828	195.279	175.839	211.339	160.389	195.278	-0.0187169	0.179279	-0.104401	0.916851	0.999962
WBGene00001149	bcat-1	K02A4.1	p > 0.05, not analyzed	p > 0.05, not analyzed	1624.34	1442.76	1449.15	1292.18	1313.22	1327.37	-0.198792	0.1052	-1.88966	0.0588034	0.999962
WBGene00001150	ech-1.1	C29F3.1	p > 0.05, not analyzed	p > 0.05, not analyzed	49.2154	25.0864	39.4144	25.7122	29.4376	45.961	-0.157236	0.380863	-0.412842	0.679722	0.999962
WBGene00001151	ech-2	F38H4.8	p > 0.05, not analyzed	p > 0.05, not analyzed	351.41	318.25	360.56	360.735	352.101	381.022	0.0865839	0.139306	0.621538	0.534246	0.999962
WBGene00001152	ech-3	F43H9.1	p > 0.05, not analyzed	p > 0.05, not analyzed	94.7826	119.115	120.038	72.0912	92.8084	135.035	-0.152665	0.250416	-0.609647	0.542096	0.999962
WBGene00001153	ech-4	R06F6.9	p > 0.05, not analyzed	p > 0.05, not analyzed	1000.81	997.943	822.347	962.384	895.304	921.282	-0.020869	0.120237	-0.173566	0.862207	0.999962
WBGene00001154	ech-5	F56B3.5	p > 0.05, not analyzed	p > 0.05, not analyzed	606.985	582.575	545.919	576.518	520.594	590.262	-0.0397719	0.124898	-0.318436	0.750154	0.999962
WBGene00001155	ech-6	T05G5.6	p > 0.05, not analyzed	p > 0.05, not analyzed	3971.63	3751.88	3764.29	3678.72	3532.9	3583.32	-0.0896895	0.0921446	-0.973356	0.330376	0.999962
WBGene00001157	ech-8	F01G10.2	p > 0.05, not analyzed	p > 0.05, not analyzed	84.7778	95.4532	127.367	111.447	107.096	83.9753	-0.0334777	0.237038	-0.141233	0.887686	0.999962
WBGene00001159	eff-1	C26D10.5	p > 0.05, not analyzed	p > 0.05, not analyzed	25.3039	25.5329	25.8963	11.6766	22.1672	17.7432	-0.559456	0.448916	-1.24624	0.212677	0.999962
WBGene00001160	efk-1	F42A10.4	p > 0.05, not analyzed	p > 0.05, not analyzed	1294.98	1276.2	1148.38	1369.22	1234.52	1288.84	0.0658	0.109124	0.602986	0.546518	0.999962
WBGene00001161	efl-1	Y102A5C.18	p > 0.05, not analyzed	p > 0.05, not analyzed	764.113	746.909	620.297	705.131	706.57	731.812	0.0100599	0.124631	0.0807181	0.935666	0.999962
WBGene00001162	efl-2	Y48C3A.17	p > 0.05, not analyzed	p > 0.05, not analyzed	202.34	228.823	185.937	252.282	237.677	218.941	0.198926	0.166715	1.19321	0.232786	0.999962
WBGene00001163	efn-2	C43F9.8	p > 0.05, not analyzed	p > 0.05, not analyzed	35.557	34.4298	31.4244	32.1585	42.1425	29.6039	0.0389054	0.355797	0.109347	0.912927	0.999962
WBGene00001164	efn-3	F15A2.5	p > 0.05, not analyzed	p > 0.05, not analyzed	51.4633	52.5908	51.3333	56.8185	48.4111	63.5766	0.119915	0.286846	0.418046	0.675913	0.999962
WBGene00001165	efn-4	F56A11.3	p > 0.05, not analyzed	p > 0.05, not analyzed	71.2431	97.5181	76.5547	81.4454	66.2458	76.49	-0.133624	0.250414	-0.533614	0.593608	0.999962
WBGene00001166	eftu-2	ZK328.2	p > 0.05, not analyzed	p > 0.05, not analyzed	3606.64	3928.11	3391.9	3979.71	3658.34	3786.24	0.0642263	0.100453	0.639364	0.522586	0.999962
WBGene00001167	eef-2	F25H5.4	p > 0.05, not analyzed	p > 0.05, not analyzed	48998.7	51271.7	40724.2	52824.2	43696.5	47917.7	0.0348189	0.114372	0.304434	0.760797	0.999962
WBGene00001168	eef-1A.1	F31E3.5	p > 0.05, not analyzed	p > 0.05, not analyzed	39637.8	40711.4	34377.5	41707.4	31924.7	39151.2	-0.0246515	0.117719	-0.20941	0.834128	0.999962
WBGene00001169	eef-1A.2	R03G5.1	p > 0.05, not analyzed	p > 0.05, not analyzed	970.891	839.388	857.698	780.204	770.793	832.853	-0.161076	0.116638	-1.38099	0.167283	0.999962
WBGene00001170	egl-1	F23B12.9	p > 0.05, not analyzed	p > 0.05, not analyzed	3.65767	3.16042	5.62962	2.14532	3.58965	2.58602	-0.583021	1.06365	-0.548131	0.583602	0.999962
WBGene00001171	egl-2	F16B3.1	p > 0.05, not analyzed	p > 0.05, not analyzed	35.9412	17.8057	34.3694	19.0512	20.1574	19.9851	-0.577351	0.430464	-1.34123	0.179846	0.999962
WBGene00001172	egl-3	C51E3.7	p > 0.05, not analyzed	p > 0.05, not analyzed	133.567	90.191	93.5867	80.4685	116.132	87.5305	-0.154071	0.244188	-0.63095	0.528073	0.999962
WBGene00001173	egl-4	F55A8.2	p > 0.05, not analyzed	p > 0.05, not analyzed	1701.45	1756.91	1522.39	1751.5	1479.1	1548.37	-0.0598065	0.113045	-0.529051	0.59677	0.999962
WBGene00001174	egl-5	C08C3.1	p > 0.05, not analyzed	p > 0.05, not analyzed	8.52135	4.35124	1.92022	2.14719	0.871501	4.20316	-1.00386	1.10759	-0.906341	0.364755	0.999962
WBGene00001175	egl-6	C46F4.1	p > 0.05, not analyzed	p > 0.05, not analyzed	53.3238	41.3268	50.6299	65.2765	57.6331	49.7504	0.24612	0.293527	0.838492	0.401754	0.999962
WBGene00001177	egl-8	B0348.4	p > 0.05, not analyzed	p > 0.05, not analyzed	484.525	521.034	468.877	451.725	499.397	452.823	-0.0698372	0.129009	-0.541334	0.588278	0.999962
WBGene00001178	egl-9	F22E12.4	p > 0.05, not analyzed	p > 0.05, not analyzed	225.264	193.351	217.692	223.449	251.472	224.652	0.137958	0.163418	0.844201	0.398557	0.999962
WBGene00001179	egl-10	F28C1.2	p > 0.05, not analyzed	p > 0.05, not analyzed	213.114	208.845	196.864	228.149	207.601	219.428	0.0817025	0.162237	0.5036	0.614542	0.999962
WBGene00001182	egl-13	T22B7.1	p > 0.05, not analyzed	p > 0.05, not analyzed	47.4387	41.0989	40.6034	29.7217	23.6447	34.5804	-0.547887	0.348485	-1.5722	0.115905	0.999962
WBGene00001184	egl-15	F58A3.2	p > 0.05, not analyzed	p > 0.05, not analyzed	88.3659	108.541	108.587	77.7984	105.016	80.9119	-0.212678	0.233725	-0.909948	0.36285	0.999962
WBGene00001186	egl-18	F55A8.1	p > 0.05, not analyzed	p > 0.05, not analyzed	261.047	283.398	266.867	258.799	297.928	275.274	0.0374364	0.15081	0.248236	0.803952	0.999962
WBGene00001187	egl-19	C48A7.1	p > 0.05, not analyzed	p > 0.05, not analyzed	104.36	77.8637	123.655	107.118	92.0678	105.144	-0.00385244	0.234698	-0.0164145	0.986904	0.999962
WBGene00001188	egl-20	W08D2.1	p > 0.05, not analyzed	p > 0.05, not analyzed	29.306	18.3746	24.041	18.4674	21.8147	13.2993	-0.419779	0.457398	-0.917753	0.358748	0.999962
WBGene00001189	egl-21	F01D4.4	p > 0.05, not analyzed	p > 0.05, not analyzed	234.801	152.179	222.5	142.51	209.387	158.416	-0.252801	0.209049	-1.20929	0.226551	0.999962
WBGene00001190	egl-23	Y37A1B.11	p > 0.05, not analyzed	p > 0.05, not analyzed	21.2245	20.6567	15.1914	15.1259	18.4537	16.5914	-0.175898	0.478989	-0.367227	0.71345	0.999962
WBGene00001193	egl-26	C23H3.1	p > 0.05, not analyzed	p > 0.05, not analyzed	223.559	191.615	179.88	192.952	188.362	199.265	-0.0319535	0.171441	-0.186382	0.852145	0.999962
WBGene00001194	egl-27	C04A2.3	p > 0.05, not analyzed	p > 0.05, not analyzed	2084.33	2152.48	1676.83	2043.21	2095.46	1963.96	0.0460183	0.116794	0.394014	0.693571	0.999962
WBGene00001196	egl-30	M01D7.7	p > 0.05, not analyzed	p > 0.05, not analyzed	220.169	250.876	184.134	168.534	186.882	187.943	-0.26651	0.177909	-1.49801	0.13413	0.999962
WBGene00001202	egl-36	R07A4.1	p > 0.05, not analyzed	p > 0.05, not analyzed	9.83704	11.9687	22.0733	9.64312	20.8309	14.2367	0.0213649	0.56038	0.0381257	0.969587	0.999962
WBGene00001204	egl-38	C04G2.7	p > 0.05, not analyzed	p > 0.05, not analyzed	6.1427	8.67409	8.61642	3.21486	5.22634	5.88035	-0.702064	0.799376	-0.878265	0.3798	0.999962
WBGene00001207	egl-43	R53.3	p > 0.05, not analyzed	p > 0.05, not analyzed	24.5215	23.5285	34.7587	21.1262	24.9455	19.6531	-0.338045	0.415964	-0.81268	0.416402	0.999962
WBGene00001209	egl-45	C27D11.1	p > 0.05, not analyzed	p > 0.05, not analyzed	6568.52	6838.58	5438.71	6614.72	5869.75	6252.58	-0.00825101	0.111109	-0.0742608	0.940803	0.999962
WBGene00001210	egl-46	K11G9.4	p > 0.05, not analyzed	p > 0.05, not analyzed	13.5136	16.2621	12.445	15.0027	20.0366	4.20066	-0.111546	0.60682	-0.18382	0.854154	0.999962
WBGene00001214	ego-1	F26A3.3	p > 0.05, not analyzed	p > 0.05, not analyzed	3983.38	3774.92	3355.46	4232.02	3931.65	3828.53	0.109916	0.104073	1.05615	0.290901	0.999962
WBGene00001224	ehs-1	ZK1248.3	p > 0.05, not analyzed	p > 0.05, not analyzed	938.536	993.563	739.344	1007.61	772.131	787.887	-0.0575599	0.145499	-0.395603	0.692398	0.999962
WBGene00001226	eif-3.C	T23D8.4	p > 0.05, not analyzed	p > 0.05, not analyzed	5646.16	6124.84	5168.34	6345.07	5596.55	5967.73	0.0803217	0.103619	0.775164	0.438243	0.999962
WBGene00001227	eif-3.D	R08D7.3	p > 0.05, not analyzed	p > 0.05, not analyzed	2998.9	3204.71	2600.4	3130.83	2720.8	2818.59	-0.0220955	0.112277	-0.196794	0.843989	0.999962
WBGene00001228	eif-3.E	B0511.10	p > 0.05, not analyzed	p > 0.05, not analyzed	1621.33	1786.38	1558.08	1726.22	1639.2	1627.42	0.00770876	0.104843	0.0735269	0.941387	0.999962
WBGene00001229	eif-3.F	D2013.7	p > 0.05, not analyzed	p > 0.05, not analyzed	1040.07	1304.07	1364.39	1290.33	1385.91	1592.04	0.202292	0.130773	1.5469	0.121887	0.999962
WBGene00001230	eif-3.G	F22B5.2	p > 0.05, not analyzed	p > 0.05, not analyzed	936.016	1131.69	945.421	1039.08	1013.15	1032.67	0.0338743	0.117051	0.289397	0.772278	0.999962
WBGene00001231	eif-3.H	C41D11.2	p > 0.05, not analyzed	p > 0.05, not analyzed	1198	1309.45	1101.42	1313.77	1203.97	1257.76	0.0651954	0.112111	0.581525	0.560887	0.999962
WBGene00001232	eif-3.I	Y74C10AR.1	p > 0.05, not analyzed	p > 0.05, not analyzed	1422.77	1915.54	1458.47	1465.09	1400.85	1541.77	-0.121057	0.128143	-0.944698	0.344813	0.999962
WBGene00001233	eif-3.K	T16G1.11	p > 0.05, not analyzed	p > 0.05, not analyzed	853.79	984.143	936.557	1107.47	982.586	989.416	0.148969	0.115726	1.28725	0.198005	0.999962
WBGene00001234	eif-6	C47B2.5	p > 0.05, not analyzed	p > 0.05, not analyzed	662.304	775.606	623.298	731.036	641	724.939	0.0247487	0.129443	0.191194	0.848374	0.999962
WBGene00001235	elb-1	Y41C4A.10	p > 0.05, not analyzed	p > 0.05, not analyzed	344.62	363.958	332.044	366.888	361.518	382.548	0.0950234	0.136721	0.695018	0.487044	0.999962
WBGene00001236	elc-1	Y82E9BR.15	p > 0.05, not analyzed	p > 0.05, not analyzed	500.439	560.26	457.728	551.805	414.952	447.264	-0.104478	0.147214	-0.709705	0.477887	0.999962
WBGene00001239	elo-1	F56H11.4	p > 0.05, not analyzed	p > 0.05, not analyzed	1739.95	1740.63	1635.45	1718.83	1526.57	1508.77	-0.106184	0.105566	-1.00586	0.314484	0.999962
WBGene00001241	elo-3	D2024.3	p > 0.05, not analyzed	p > 0.05, not analyzed	828.349	825.264	706.317	835.81	722.752	786.931	-0.00847618	0.123038	-0.0688906	0.945077	0.999962
WBGene00001242	elo-4	C40H1.4	p > 0.05, not analyzed	p > 0.05, not analyzed	24.5195	11.8304	22.8476	18.2234	28.1068	29.6146	0.369531	0.455325	0.811576	0.417035	0.999962
WBGene00001243	elo-5	F41H10.7	p > 0.05, not analyzed	p > 0.05, not analyzed	2033.59	1969.19	2659.74	1885.63	2148.79	2275.55	-0.0786649	0.131239	-0.599401	0.548905	0.999962
WBGene00001244	elo-6	F41H10.8	p > 0.05, not analyzed	p > 0.05, not analyzed	2438.18	2400.49	3038.73	2910.44	2851.53	3078.62	0.165912	0.115134	1.44104	0.149573	0.999962
WBGene00001247	elo-9	Y53F4B.2	p > 0.05, not analyzed	p > 0.05, not analyzed	88.3783	86.448	82.1412	75.0238	102.267	85.9427	0.0398647	0.236993	0.168211	0.866418	0.999962
WBGene00001248	elp-1	F38A6.2	p > 0.05, not analyzed	p > 0.05, not analyzed	60.3073	37.1235	50.0255	57.8492	48.4326	53.4313	0.116723	0.303409	0.384705	0.700456	0.999962
WBGene00001249	elt-1	W09C2.1	p > 0.05, not analyzed	p > 0.05, not analyzed	88.6842	107.951	109.656	63.5389	107.109	97.6174	-0.185736	0.247501	-0.750445	0.452987	0.999962
WBGene00001250	elt-2	C33D3.1	p > 0.05, not analyzed	p > 0.05, not analyzed	83.571	67.3201	82.4162	62.1502	66.9739	52.8564	-0.359575	0.260533	-1.38015	0.167539	0.999962
WBGene00001251	elt-3	K02B9.4	p > 0.05, not analyzed	p > 0.05, not analyzed	53.587	55.2705	65.2697	63.9093	53.9494	51.6188	-0.0505625	0.280491	-0.180264	0.856945	0.999962
WBGene00001253	elt-6	F52C12.5	p > 0.05, not analyzed	p > 0.05, not analyzed	31.9415	30.3573	24.8908	15.0027	25.2624	20.1624	-0.51562	0.420046	-1.22753	0.219623	0.999962
WBGene00001258	emb-4	Y80D3A.2	p > 0.05, not analyzed	p > 0.05, not analyzed	3207.1	3041.03	2561.56	3044.9	2988.48	2710.3	-0.0105672	0.112998	-0.093516	0.925494	0.999962
WBGene00001259	emb-5	T04A8.14	p > 0.05, not analyzed	p > 0.05, not analyzed	6867.55	6695.57	5705.02	6718.2	6223.05	6383.4	0.0043686	0.103691	0.0421308	0.966394	0.999962
WBGene00001262	emb-8	K10D2.6	p > 0.05, not analyzed	p > 0.05, not analyzed	1670.73	1649.72	1435.9	1720.6	1590.14	1576.49	0.0394249	0.108885	0.36208	0.717293	0.999962
WBGene00001281	emb-27	F10B5.6	p > 0.05, not analyzed	p > 0.05, not analyzed	1468.55	1448.58	1249.45	1540.69	1374.3	1381.41	0.0444443	0.113227	0.392523	0.694672	0.999962
WBGene00001284	emb-30	F54C8.3	p > 0.05, not analyzed	p > 0.05, not analyzed	1729.61	1855.98	1549.06	1724.69	1639.76	1588.93	-0.0517521	0.109206	-0.473894	0.635576	0.999962
WBGene00001303	sec-61.G	F32D8.6	p > 0.05, not analyzed	p > 0.05, not analyzed	1618.07	1790.86	1790.31	1640.62	1679.03	1491.47	-0.112682	0.106254	-1.0605	0.288918	0.999962
WBGene00001309	emr-1	M01D7.6	p > 0.05, not analyzed	p > 0.05, not analyzed	488.501	568.51	505.249	523.863	579.167	562.925	0.0931842	0.127756	0.729389	0.465763	0.999962
WBGene00001310	end-1	F58E10.2	p > 0.05, not analyzed	p > 0.05, not analyzed	4.89481	11.747	14.2093	9.65013	6.19345	12.7725	-0.124854	0.667946	-0.186923	0.851721	0.999962
WBGene00001311	end-3	F58E10.5	p > 0.05, not analyzed	p > 0.05, not analyzed	9.80177	9.65662	10.4546	5.3603	8.80476	11.8708	-0.187111	0.66203	-0.282632	0.777459	0.999962
WBGene00001320	ent-1	ZK809.4	p > 0.05, not analyzed	p > 0.05, not analyzed	699.396	704.017	583.859	771.5	631.96	736.251	0.107114	0.13237	0.809198	0.418401	0.999962
WBGene00001324	eor-1	R11E3.6	p > 0.05, not analyzed	p > 0.05, not analyzed	757.297	677.692	569.778	800.853	563.537	653.173	0.00867799	0.152494	0.0569073	0.954619	0.999962
WBGene00001325	eor-2	C44H4.7	p > 0.05, not analyzed	p > 0.05, not analyzed	371.949	350.475	348.93	392.721	396.887	341.821	0.077993	0.139747	0.558102	0.576775	0.999962
WBGene00001329	epn-1	T04C10.2	p > 0.05, not analyzed	p > 0.05, not analyzed	452.837	428.393	436.509	427.399	398.369	424.613	-0.0756822	0.129533	-0.584271	0.559038	0.999962
WBGene00001330	eps-8	Y57G11C.24	p > 0.05, not analyzed	p > 0.05, not analyzed	325.063	343.516	364.034	289.515	315.634	302.314	-0.186841	0.142262	-1.31336	0.189063	0.999962
WBGene00001331	erd-2.1	F09B9.3	p > 0.05, not analyzed	p > 0.05, not analyzed	368.1	363.613	384.513	428.733	400.947	424.384	0.166987	0.132499	1.26029	0.207564	0.999962
WBGene00001332	eri-1	T07A9.5	p > 0.05, not analyzed	p > 0.05, not analyzed	771.255	757.868	836.239	825.968	844.137	843.164	0.0869794	0.112395	0.773872	0.439006	0.999962
WBGene00001333	erm-1	C01G8.5	p > 0.05, not analyzed	p > 0.05, not analyzed	1946.46	2090.78	1722.44	1915.55	2007.32	1940.65	0.0263458	0.108063	0.2438	0.807386	0.999962
WBGene00001334	ero-1	Y105E8B.8	p > 0.05, not analyzed	p > 0.05, not analyzed	756.911	758.546	663.589	797.774	743.56	675	0.0241826	0.123878	0.195213	0.845226	0.999962
WBGene00001335	F35A5.8	F35A5.8	p > 0.05, not analyzed	p > 0.05, not analyzed	108.788	92.2637	95.7661	90.7514	92.3348	94.7783	-0.0921711	0.221456	-0.416205	0.67726	0.999962
WBGene00001336	qars-1	Y41E3.4	p > 0.05, not analyzed	p > 0.05, not analyzed	2091.65	2176.88	1848.33	2238.62	1978.9	2014.73	0.0270713	0.109321	0.247632	0.804419	0.999962
WBGene00001337	ears-1	ZC434.5	p > 0.05, not analyzed	p > 0.05, not analyzed	3273.76	3561.81	2761.14	3346.47	2909.14	3076.42	-0.0402779	0.116611	-0.345402	0.729792	0.999962
WBGene00001338	ears-2	T07A9.2	p > 0.05, not analyzed	p > 0.05, not analyzed	251.95	212.846	247.271	285.032	277.427	262.574	0.211881	0.155785	1.36009	0.173802	0.999962
WBGene00001340	etr-1	T01D1.2	p > 0.05, not analyzed	p > 0.05, not analyzed	1093.49	1144.81	889.827	1115.33	971.3	1039.61	-0.000466108	0.126102	-0.00369629	0.997051	0.999962
WBGene00001345	fos-1	F29G9.4	p > 0.05, not analyzed	p > 0.05, not analyzed	71.8758	48.1609	43.0017	35.6219	52.2791	49.5752	-0.228177	0.318463	-0.716495	0.473686	0.999962
WBGene00001352	evl-14	H38K22.1	p > 0.05, not analyzed	p > 0.05, not analyzed	2771.19	2689.75	2321.42	2697.13	2452.2	2433.85	-0.037239	0.108269	-0.343949	0.730885	0.999962
WBGene00001358	evl-20	F22B5.1	p > 0.05, not analyzed	p > 0.05, not analyzed	210.056	225.772	260.084	188.756	258.59	260.597	0.0256405	0.177924	0.144109	0.885414	0.999962
WBGene00001362	exc-1	C46E1.3	p > 0.05, not analyzed	p > 0.05, not analyzed	17.2261	6.54533	8.6529	3.214	6.92535	6.68429	-0.915298	0.738488	-1.23942	0.21519	0.999962
WBGene00001365	exc-4	Y105E8A.22	p > 0.05, not analyzed	p > 0.05, not analyzed	414.528	406.399	374.638	447.843	416.043	411.532	0.0934554	0.133007	0.702637	0.482282	0.999962
WBGene00001366	exc-5	C33D9.1	p > 0.05, not analyzed	p > 0.05, not analyzed	79.2557	83.5645	93.2544	87.2237	87.8136	74.7252	-0.040368	0.236048	-0.171016	0.864211	0.999962
WBGene00001368	exc-7	F35H8.5	p > 0.05, not analyzed	p > 0.05, not analyzed	41.8243	35.9636	46.1171	25.7132	46.7933	34.287	-0.208011	0.350348	-0.593726	0.552695	0.999962
WBGene00001371	exl-1	F26H11.5	p > 0.05, not analyzed	p > 0.05, not analyzed	243.566	234.049	293.814	246.608	304.125	349.729	0.223914	0.172162	1.3006	0.193395	0.999962
WBGene00001372	exo-3	R09B3.1	p > 0.05, not analyzed	p > 0.05, not analyzed	907.659	926.383	736.005	904.654	840.425	890.448	0.0373138	0.124516	0.299672	0.764428	0.999962
WBGene00001374	exp-2	F12F3.1	p > 0.05, not analyzed	p > 0.05, not analyzed	15.3375	13.9471	26.3747	13.9349	21.4903	12.848	-0.23302	0.509906	-0.456987	0.64768	0.999962
WBGene00001377	eya-1	C49A1.4	p > 0.05, not analyzed	p > 0.05, not analyzed	29.915	32.527	42.8828	22.7223	31.2263	35.9003	-0.228691	0.372517	-0.613907	0.539277	0.999962
WBGene00001385	far-1	F02A9.2	p > 0.05, not analyzed	p > 0.05, not analyzed	3002.15	2561.49	2571.3	2209.18	2678.67	2714.48	-0.0967815	0.1172	-0.82578	0.408929	0.999962
WBGene00001386	far-2	F02A9.3	p > 0.05, not analyzed	p > 0.05, not analyzed	10519	8835.77	9481.23	7887.37	8762.78	9363.38	-0.148382	0.107189	-1.38431	0.166265	0.999962
WBGene00001387	far-3	F15B9.1	p > 0.05, not analyzed	p > 0.05, not analyzed	30.5582	34.0284	60.4463	23.5925	44.4343	41.0271	-0.199358	0.37764	-0.527905	0.597565	0.999962
WBGene00001389	far-5	F15B9.3	p > 0.05, not analyzed	p > 0.05, not analyzed	63.2872	25.3216	46.4957	47.8418	35.3595	36.7186	-0.149374	0.363458	-0.410981	0.681087	0.999962
WBGene00001391	far-7	K01A2.2	p > 0.05, not analyzed	p > 0.05, not analyzed	11.4499	8.18171	13.9803	12.6074	9.68098	14.5669	0.13242	0.598774	0.221151	0.824975	0.999962
WBGene00001392	far-8	K02F3.3	p > 0.05, not analyzed	p > 0.05, not analyzed	306.048	151.874	389.749	240.169	283.568	164.116	-0.302073	0.444571	-0.679472	0.496839	0.999962
WBGene00001393	fat-1	Y67H2A.8	p > 0.05, not analyzed	p > 0.05, not analyzed	2769.17	2644.66	2746.83	3078.76	2580.8	2710.71	0.0361436	0.104288	0.346576	0.72891	0.999962
WBGene00001394	fat-2	W02A2.1	p > 0.05, not analyzed	p > 0.05, not analyzed	4063.73	3599.61	3879.34	3573.96	3374.83	3323.69	-0.168135	0.0978152	-1.71891	0.0856313	0.999962
WBGene00001396	fat-4	T13F2.1	p > 0.05, not analyzed	p > 0.05, not analyzed	2197.84	1910.45	2350.92	2504.37	2187.84	2419.46	0.138461	0.113071	1.22455	0.220745	0.999962
WBGene00001397	fat-5	W06D12.3	p > 0.05, not analyzed	p > 0.05, not analyzed	193.89	199.707	182.3	152.197	160.124	188.065	-0.199229	0.177467	-1.12262	0.261598	0.999962
WBGene00001398	fat-6	VZK822L.1	p > 0.05, not analyzed	p > 0.05, not analyzed	1568.16	1561.97	1857.28	1691.97	1644.31	1398.52	-0.0761396	0.119777	-0.635679	0.524986	0.999962
WBGene00001400	fax-1	F56E3.4	p > 0.05, not analyzed	p > 0.05, not analyzed	4.95415	5.24553	3.7046	4.1446	1.82388	0.87943	-1.04323	1.10386	-0.945072	0.344622	0.999962
WBGene00001401	fbf-1	H12I13.4	p > 0.05, not analyzed	p > 0.05, not analyzed	703.697	748.97	617.933	721.028	622.813	651.243	-0.0537318	0.12742	-0.421691	0.67325	0.999962
WBGene00001402	fbf-2	F21H12.5	p > 0.05, not analyzed	p > 0.05, not analyzed	540.092	572.424	539.174	639.601	520.536	604.364	0.0941611	0.12932	0.728122	0.466539	0.999962
WBGene00001403	fbl-1	F56H11.1	p > 0.05, not analyzed	p > 0.05, not analyzed	142.899	138.9	143.052	135.332	150.388	132.514	-0.0220379	0.189307	-0.116413	0.907325	0.999962
WBGene00001404	fbp-1	K07A3.1	p > 0.05, not analyzed	p > 0.05, not analyzed	1236.62	1215.89	1245.51	1229.63	1220.56	1185.16	-0.024897	0.102093	-0.243866	0.807334	0.999962
WBGene00001405	fce-1	C04F12.10	p > 0.05, not analyzed	p > 0.05, not analyzed	943.667	980.781	1034.42	1166.96	1062.89	1046.97	0.14582	0.110682	1.31747	0.18768	0.999962
WBGene00001406	fce-2	F48F5.5	p > 0.05, not analyzed	p > 0.05, not analyzed	267.558	301.346	289.31	297.957	323.564	287.438	0.0819219	0.147851	0.554084	0.579521	0.999962
WBGene00001410	feh-1	Y54F10AM.2	p > 0.05, not analyzed	p > 0.05, not analyzed	43.4396	27.5305	45.9503	31.4259	39.9797	27.8507	-0.23517	0.36123	-0.651024	0.515031	0.999962
WBGene00001411	fem-1	F35D6.1	p > 0.05, not analyzed	p > 0.05, not analyzed	912.334	960.685	770.671	952.839	864.927	848.388	0.0124636	0.123948	0.100555	0.919904	0.999962
WBGene00001412	fem-2	T19C3.8	p > 0.05, not analyzed	p > 0.05, not analyzed	956.575	1152.98	820.368	1126.12	917.728	1051.3	0.0791691	0.13948	0.567604	0.570304	0.999962
WBGene00001413	fem-3	C01F6.4	p > 0.05, not analyzed	p > 0.05, not analyzed	695.399	746.639	826.688	871.114	874.359	924.183	0.233251	0.117731	1.98121	0.0475672	0.999962
WBGene00001423	fib-1	T01C3.7	p > 0.05, not analyzed	p > 0.05, not analyzed	3261.82	3392.39	2668.37	3519.56	2801.12	2786.68	-0.0338213	0.127438	-0.265394	0.790706	0.999962
WBGene00001425	fis-2	F13B9.8	p > 0.05, not analyzed	p > 0.05, not analyzed	140.464	146.353	177.225	161.942	199.628	220.202	0.325905	0.191223	1.70432	0.0883213	0.999962
WBGene00001426	fkb-1	F36H1.1	p > 0.05, not analyzed	p > 0.05, not analyzed	841.917	899.069	857.577	821.791	911.879	827.31	-0.0209203	0.112958	-0.185205	0.853068	0.999962
WBGene00001427	fkb-2	Y18D10A.19	p > 0.05, not analyzed	p > 0.05, not analyzed	1758.66	2125.99	1922.19	2079.14	2157.39	2243.14	0.157941	0.107844	1.46453	0.143049	0.999962
WBGene00001428	fkb-3	C05C8.3	p > 0.05, not analyzed	p > 0.05, not analyzed	131.248	131.477	167.787	114.691	138.488	142.738	-0.121233	0.20275	-0.597943	0.549878	0.999962
WBGene00001429	fkb-4	ZC455.10	p > 0.05, not analyzed	p > 0.05, not analyzed	9.81302	15.0879	10.4868	12.8626	7.01188	9.29045	-0.29162	0.620723	-0.469806	0.638493	0.999962
WBGene00001430	fkb-5	C50F2.6	p > 0.05, not analyzed	p > 0.05, not analyzed	140.317	155.295	178.713	158.108	193.308	165.8	0.122763	0.187705	0.654022	0.513097	0.999962
WBGene00001431	fkb-6	F31D4.3	p > 0.05, not analyzed	p > 0.05, not analyzed	2845.8	3006.56	2241.34	2854.71	2490.34	2650.42	-0.0173754	0.123254	-0.140972	0.887892	0.999962
WBGene00001432	fkb-7	B0511.1	p > 0.05, not analyzed	p > 0.05, not analyzed	34.4066	39.0667	51.7292	40.7201	44.3853	37.7737	-0.0352523	0.329025	-0.107142	0.914677	0.999962
WBGene00001433	fkb-8	Y18D10A.25	p > 0.05, not analyzed	p > 0.05, not analyzed	12.3431	21.7089	18.2369	16.173	34.3426	21.2949	0.457501	0.478343	0.956428	0.338856	0.999962
WBGene00001434	fkh-2	T14G12.4	p > 0.05, not analyzed	p > 0.05, not analyzed	7.17767	6.2233	5.79362	6.16394	7.53066	2.91288	-0.19717	0.822663	-0.239673	0.810583	0.999962
WBGene00001435	fkh-3	C29F7.4	p > 0.05, not analyzed	p > 0.05, not analyzed	202.382	214.02	271.682	199.967	229.579	261.461	0.00514861	0.178378	0.0288634	0.976974	0.999962
WBGene00001436	fkh-4	C29F7.5	p > 0.05, not analyzed	p > 0.05, not analyzed	133.938	118.277	180.086	151.093	158.405	196.435	0.22497	0.208658	1.07818	0.280954	0.999962
WBGene00001437	fkh-5	F26A1.2	p > 0.05, not analyzed	p > 0.05, not analyzed	12.2866	7.59279	18.1951	9.64442	13.0607	12.5964	-0.112059	0.591695	-0.189386	0.849791	0.999962
WBGene00001438	fkh-6	B0286.5	p > 0.05, not analyzed	p > 0.05, not analyzed	11.0561	9.75588	5.74327	4.28652	11.3267	8.40239	-0.117893	0.711354	-0.165731	0.868369	0.999962
WBGene00001439	fkh-7	F26D12.1	p > 0.05, not analyzed	p > 0.05, not analyzed	60.3645	81.265	58.4096	61.1195	52.3808	59.0158	-0.209341	0.275178	-0.760749	0.446807	0.999962
WBGene00001440	fkh-8	F40H3.4	p > 0.05, not analyzed	p > 0.05, not analyzed	7.36259	7.55517	11.452	9.64638	7.87633	10.9651	0.101541	0.663467	0.153046	0.878362	0.999962
WBGene00001441	fkh-9	K03C7.2	p > 0.05, not analyzed	p > 0.05, not analyzed	35.4517	46.3225	27.1477	31.6182	35.8853	38.0529	-0.0306705	0.35678	-0.0859646	0.931495	0.999962
WBGene00001443	fli-1	B0523.5	p > 0.05, not analyzed	p > 0.05, not analyzed	1673.7	1689.43	1328.22	1688.14	1533.44	1456.63	-0.0037613	0.122883	-0.0306088	0.975581	0.999962
WBGene00001444	flp-1	F23B2.5	p > 0.05, not analyzed	p > 0.05, not analyzed	55.0272	36.1868	62.9865	39.5503	54.0362	43.2992	-0.17142	0.320177	-0.535392	0.592379	0.999962
WBGene00001445	flp-2	W07E11.3	p > 0.05, not analyzed	p > 0.05, not analyzed	4.66149	8.67295	5.51926	4.43777	5.59715	4.98838	-0.324082	0.837054	-0.387169	0.698631	0.999962
WBGene00001446	flp-3	W07E11.2	p > 0.05, not analyzed	p > 0.05, not analyzed	35.5342	10.7328	21.8642	8.57638	29.9269	16.9537	-0.275933	0.538568	-0.512346	0.608409	0.999962
WBGene00001447	flp-4	C18D1.3	p > 0.05, not analyzed	p > 0.05, not analyzed	13.5117	9.53777	15.1107	11.8949	7.25291	11.6159	-0.315568	0.600081	-0.525876	0.598974	0.999962
WBGene00001448	flp-5	C03G5.7	p > 0.05, not analyzed	p > 0.05, not analyzed	30.5807	17.9449	27.3032	22.6851	21.7993	13.0785	-0.402714	0.451707	-0.891538	0.37264	0.999962
WBGene00001449	flp-6	F07D3.2	p > 0.05, not analyzed	p > 0.05, not analyzed	107.659	89.6185	119.278	82.5648	95.6507	123.573	-0.0654778	0.234589	-0.279117	0.780155	0.999962
WBGene00001450	flp-7	F49E10.3	p > 0.05, not analyzed	p > 0.05, not analyzed	20.8043	13.8861	28.4233	18.2279	22.114	17.8776	-0.1217	0.466462	-0.260899	0.79417	0.999962
WBGene00001451	flp-8	F31F6.4	p > 0.05, not analyzed	p > 0.05, not analyzed	7.37658	14.9995	33.4737	15.0354	21.352	17.9454	-0.0605185	0.541449	-0.111771	0.911005	0.999962
WBGene00001452	flp-9	C36H8.3	p > 0.05, not analyzed	p > 0.05, not analyzed	50.0776	32.8738	46.1893	53.6232	62.3886	32.5612	0.201092	0.338857	0.59344	0.552886	0.999962
WBGene00001453	flp-10	T06C10.4	p > 0.05, not analyzed	p > 0.05, not analyzed	9.77995	13.831	12.2825	9.65134	11.5469	9.3978	-0.233955	0.600039	-0.389899	0.696611	0.999962
WBGene00001454	flp-11	K02G10.4	p > 0.05, not analyzed	p > 0.05, not analyzed	17.7379	18.511	19.1841	9.38244	17.2617	19.4303	-0.249003	0.501807	-0.496214	0.619744	0.999962
WBGene00001455	flp-12	C05E11.8	p > 0.05, not analyzed	p > 0.05, not analyzed	23.034	22.7219	44.4018	33.2635	42.1409	41.2809	0.361555	0.379607	0.952446	0.340871	0.999962
WBGene00001456	flp-13	F33D4.3	p > 0.05, not analyzed	p > 0.05, not analyzed	20.8064	9.61711	12.32	8.57771	13.2632	7.65926	-0.520633	0.603846	-0.862195	0.38858	0.999962
WBGene00001457	flp-14	Y37D8A.15	p > 0.05, not analyzed	p > 0.05, not analyzed	23.0959	19.8021	39.1068	13.9476	22.6884	23.5073	-0.447816	0.449047	-0.997259	0.318639	0.999962
WBGene00001458	flp-15	ZK525.1	p > 0.05, not analyzed	p > 0.05, not analyzed	14.5648	16.5899	18.5532	11.803	9.124	6.12458	-0.894845	0.576262	-1.55285	0.12046	0.999962
WBGene00001459	flp-16	F15D4.8	p > 0.05, not analyzed	p > 0.05, not analyzed	21.9909	18.0448	29.2414	22.5211	26.7114	21.4035	0.0225828	0.42822	0.0527363	0.957942	0.999962
WBGene00001460	flp-17	C52D10.11	p > 0.05, not analyzed	p > 0.05, not analyzed	37.9242	20.2687	31.2372	28.9514	40.7445	31.5354	0.187262	0.383048	0.488873	0.624932	0.999962
WBGene00001461	flp-18	Y48D7A.2	p > 0.05, not analyzed	p > 0.05, not analyzed	49.9569	29.1983	72.7559	47.1171	41.9617	37.4933	-0.273713	0.349909	-0.78224	0.434074	0.999962
WBGene00001462	flp-19	M79.4	p > 0.05, not analyzed	p > 0.05, not analyzed	12.2227	6.3791	16.0539	17.1583	18.6662	5.98416	0.257061	0.621747	0.413449	0.679278	0.999962
WBGene00001463	flp-20	E01H11.3	p > 0.05, not analyzed	p > 0.05, not analyzed	9.73616	5.23311	10.2731	4.29131	9.93919	11.2735	0.029448	0.712209	0.0413474	0.967019	0.999962
WBGene00001465	flr-1	F02D10.5	p > 0.05, not analyzed	p > 0.05, not analyzed	50.4233	42.4626	46.0872	38.5714	34.6948	24.2719	-0.51697	0.339074	-1.52465	0.127346	0.999962
WBGene00001466	gpla-1	F58H1.4	p > 0.05, not analyzed	p > 0.05, not analyzed	4.90131	4.29327	11.4077	9.64842	18.4836	10.1719	0.87688	0.687916	1.27469	0.202419	0.999962
WBGene00001468	flr-4	F09B12.6	p > 0.05, not analyzed	p > 0.05, not analyzed	22.1391	19.6053	19.2078	24.6424	26.8784	24.264	0.318132	0.423966	0.750371	0.453031	0.999962
WBGene00001470	baz-2	ZK783.4	p > 0.05, not analyzed	p > 0.05, not analyzed	865.76	921.78	837.53	932.98	945.379	1012.02	0.139617	0.111455	1.25267	0.210326	0.999962
WBGene00001475	fmi-1	F15B9.7	p > 0.05, not analyzed	p > 0.05, not analyzed	196.51	157.762	173.087	154.767	200.948	148.899	-0.0578793	0.191478	-0.302276	0.762441	0.999962
WBGene00001476	fmo-1	K08C7.2	p > 0.05, not analyzed	p > 0.05, not analyzed	41.5361	41.1765	30.4637	34.709	28.2709	29.1808	-0.293204	0.356223	-0.823091	0.410456	0.999962
WBGene00001477	fmo-2	K08C7.5	p > 0.05, not analyzed	p > 0.05, not analyzed	34.4187	14.1271	27.8073	18.2158	18.2504	15.9293	-0.540626	0.465783	-1.16068	0.245771	0.999962
WBGene00001478	fmo-3	Y39A1A.19	p > 0.05, not analyzed	p > 0.05, not analyzed	75.0774	57.9994	88.3485	69.8366	53.0987	65.5152	-0.240107	0.271893	-0.883096	0.377184	0.999962
WBGene00001479	fmo-4	F53F4.5	p > 0.05, not analyzed	p > 0.05, not analyzed	277.962	237.419	310.186	248.568	300.895	295.377	0.0341924	0.162677	0.210185	0.833523	0.999962
WBGene00001480	fmo-5	H24K24.5	p > 0.05, not analyzed	p > 0.05, not analyzed	96.6533	69.5637	87.1934	86.0926	56.2696	101.28	-0.0669976	0.269014	-0.249049	0.803323	0.999962
WBGene00001481	fog-1	Y54E10A.4	p > 0.05, not analyzed	p > 0.05, not analyzed	256.813	301.027	279.234	266.979	297.117	232.565	-0.0740404	0.160528	-0.461232	0.644632	0.999962
WBGene00001482	fog-2	Y113G7B.5	p > 0.05, not analyzed	p > 0.05, not analyzed	431.79	450.65	494.379	515.03	534.477	479.87	0.14975	0.130007	1.15186	0.249378	0.999962
WBGene00001483	fog-3	C03C11.2	p > 0.05, not analyzed	p > 0.05, not analyzed	8.58504	3.23115	6.67061	7.50335	7.89329	5.07026	0.149818	0.795892	0.18824	0.850689	0.999962
WBGene00001484	fox-1	T07D1.4	p > 0.05, not analyzed	p > 0.05, not analyzed	100.658	112.741	116.591	93.4469	134.549	112.345	0.0449532	0.220217	0.204132	0.83825	0.999962
WBGene00001485	fre-1	Y113G7A.8	p > 0.05, not analyzed	p > 0.05, not analyzed	704.625	682.576	564.326	648.132	600.376	634.753	-0.0499972	0.128945	-0.387741	0.698208	0.999962
WBGene00001486	frh-1	F59G1.7	p > 0.05, not analyzed	p > 0.05, not analyzed	110.251	120.092	171.945	126.506	129.519	213.802	0.222402	0.242855	0.915778	0.359783	0.999962
WBGene00001488	frm-1	ZK270.2	p > 0.05, not analyzed	p > 0.05, not analyzed	2020.04	2170.05	1704.12	2044.84	1908.41	1952.76	0.00319722	0.114473	0.0279299	0.977718	0.999962
WBGene00001489	frm-2	T04C9.6	p > 0.05, not analyzed	p > 0.05, not analyzed	150.29	153.221	150.704	135.658	125.33	136.76	-0.192168	0.187341	-1.02577	0.305001	0.999962
WBGene00001490	frm-3	H05G16.1	p > 0.05, not analyzed	p > 0.05, not analyzed	89.446	74.8828	72.3101	92.1788	83.8277	64.1299	0.0195934	0.252204	0.0776889	0.938075	0.999962
WBGene00001491	frm-4	C24A11.8	p > 0.05, not analyzed	p > 0.05, not analyzed	926.558	973.129	853.616	1017.95	923.121	857.433	0.0229363	0.118749	0.19315	0.846842	0.999962
WBGene00001492	frm-5.1	Y38C1AB.8	p > 0.05, not analyzed	p > 0.05, not analyzed	188.505	246.531	224.32	268.933	237.141	307.291	0.301191	0.171651	1.75467	0.0793156	0.999962
WBGene00001493	frm-7	C51F7.1	p > 0.05, not analyzed	p > 0.05, not analyzed	630.376	585.083	484.436	590.237	597.529	636.947	0.104928	0.133814	0.784136	0.43296	0.999962
WBGene00001494	frm-8	H09G03.2	p > 0.05, not analyzed	p > 0.05, not analyzed	39.146	61.6423	62.1545	63.3624	72.6468	52.6788	0.203441	0.293849	0.692331	0.488729	0.999962
WBGene00001495	F31B12.3	F31B12.3	p > 0.05, not analyzed	p > 0.05, not analyzed	13.4807	8.59153	21.8736	13.9363	9.6761	26.2639	0.178999	0.569039	0.314564	0.753093	0.999962
WBGene00001496	frm-10	F25H9.5	p > 0.05, not analyzed	p > 0.05, not analyzed	1006.4	1038.66	1037.35	1007.66	1114.68	894.55	-0.0316983	0.118052	-0.268511	0.788306	0.999962
WBGene00001497	fars-1	T08B2.9	p > 0.05, not analyzed	p > 0.05, not analyzed	1783.87	2022.43	1710.23	2015.51	1884.85	1831.09	0.054966	0.108367	0.50722	0.612	0.999962
WBGene00001498	fars-3	F22B5.9	p > 0.05, not analyzed	p > 0.05, not analyzed	1815.09	1842.71	1520.53	1902.88	1590.42	1687.8	0.000805822	0.118515	0.00679932	0.994575	0.999962
WBGene00001499	fsn-1	C26E6.5	p > 0.05, not analyzed	p > 0.05, not analyzed	1107.96	1106.3	977.038	1160.6	1063.41	1082.62	0.0514884	0.111715	0.46089	0.644878	0.999962
WBGene00001500	ftn-1	C54F6.14	p > 0.05, not analyzed	p > 0.05, not analyzed	4.88283	12.6978	11.2944	15.0156	13.3989	19.7466	0.723235	0.587312	1.23143	0.218161	0.999962
WBGene00001502	ftt-2	F52D10.3	p > 0.05, not analyzed	p > 0.05, not analyzed	1606.62	1684.07	1547.4	1624.45	1644.66	1677.19	0.0322378	0.100085	0.322103	0.747374	0.999962
WBGene00001503	fum-1	H14A12.2	p > 0.05, not analyzed	p > 0.05, not analyzed	1707.48	1585.73	1329.13	1630.84	1485.01	1604.45	0.031063	0.118547	0.262031	0.793297	0.999962
WBGene00001505	fut-1	K08F8.3	p > 0.05, not analyzed	p > 0.05, not analyzed	63.49	74.7498	61.9535	59.6927	51.0788	65.2886	-0.184406	0.270481	-0.681771	0.495384	0.999962
WBGene00001507	fut-4	K12H6.3	p > 0.05, not analyzed	p > 0.05, not analyzed	2.45543	5.4071	3.82254	4.28694	6.98718	9.26208	0.815922	0.884629	0.922333	0.356355	0.999962
WBGene00001508	fut-8	C10F3.6	p > 0.05, not analyzed	p > 0.05, not analyzed	72.892	62.3378	75.3327	81.8144	92.4005	55.5135	0.122132	0.269863	0.45257	0.650858	0.999962
WBGene00001509	fzo-1	ZK1248.14	p > 0.05, not analyzed	p > 0.05, not analyzed	1284.68	1274.59	1100.14	1287.72	1192.48	1195.29	0.00670528	0.112202	0.0597607	0.952346	0.999962
WBGene00001510	fzr-1	ZK1307.6	p > 0.05, not analyzed	p > 0.05, not analyzed	995.791	973.419	792.07	946.995	866.1	893.693	-0.0278757	0.123951	-0.224893	0.822063	0.999962
WBGene00001511	fzy-1	ZK177.6	p > 0.05, not analyzed	p > 0.05, not analyzed	2460.39	2592.43	2208.04	2632.59	2408.98	2623.28	0.0783314	0.105108	0.745249	0.456121	0.999962
WBGene00001512	gab-1	ZC482.1	p > 0.05, not analyzed	p > 0.05, not analyzed	3.68848	5.4379	5.75648	6.42887	3.47339	4.1889	-0.101528	0.903179	-0.112412	0.910497	0.999962
WBGene00001513	gad-1	T05H4.14	p > 0.05, not analyzed	p > 0.05, not analyzed	1908.74	2000.23	1641.93	2066.78	1980.94	1944.15	0.110628	0.109551	1.00983	0.312575	0.999962
WBGene00001514	xnd-1	C05D2.5	p > 0.05, not analyzed	p > 0.05, not analyzed	1926.67	1957.37	1426.38	1944.51	1687.87	1711.77	0.00951373	0.132064	0.0720389	0.942571	0.999962
WBGene00001515	gap-1	T24C12.2	p > 0.05, not analyzed	p > 0.05, not analyzed	25.8239	39.1803	26.8766	16.0717	42.5187	30.1415	-0.0390565	0.417785	-0.0934846	0.925519	0.999962
WBGene00001516	gap-2	ZK899.8	p > 0.05, not analyzed	p > 0.05, not analyzed	426.679	552.008	460.396	518.852	521.3	546.149	0.140202	0.136403	1.02785	0.304021	0.999962
WBGene00001517	gar-1	C15B12.5	p > 0.05, not analyzed	p > 0.05, not analyzed	12.7631	6.92164	7.57619	12.0515	6.45853	8.91917	0.00693904	0.677158	0.0102473	0.991824	0.999962
WBGene00001518	gar-2	F47D12.1	p > 0.05, not analyzed	p > 0.05, not analyzed	13.6595	15.7866	41.8843	19.6089	21.6186	17.0313	-0.315236	0.49582	-0.635786	0.524916	0.999962
WBGene00001519	gar-3	Y40H4A.1	p > 0.05, not analyzed	p > 0.05, not analyzed	16.0796	19.7151	20.2816	28.0145	26.1319	15.1466	0.2933	0.460085	0.637491	0.523805	0.999962
WBGene00001520	gas-1	K09A9.5	p > 0.05, not analyzed	p > 0.05, not analyzed	697.017	680.418	662.679	693.265	636.017	707.461	-0.00211642	0.117393	-0.0180285	0.985616	0.999962
WBGene00001522	gbh-1	D2089.5	p > 0.05, not analyzed	p > 0.05, not analyzed	117.921	117.027	144.502	109.308	135.972	134.482	0.00139459	0.206718	0.00674632	0.994617	0.999962
WBGene00001523	gbh-2	M05D6.7	p > 0.05, not analyzed	p > 0.05, not analyzed	81.0695	78.0136	77.511	84.6604	67.9899	51.2741	-0.221567	0.26386	-0.839716	0.401068	0.999962
WBGene00001526	gck-1	T19A5.2	p > 0.05, not analyzed	p > 0.05, not analyzed	567.406	532.129	384.621	506.206	442.137	442.881	-0.0913731	0.156698	-0.583118	0.559814	0.999962
WBGene00001527	gcs-1	F37B12.2	p > 0.05, not analyzed	p > 0.05, not analyzed	1304.15	1306.45	1152.5	1371.33	1189.83	1190.15	-0.00474908	0.114457	-0.0414925	0.966903	0.999962
WBGene00001535	gcy-8	C49H3.1	p > 0.05, not analyzed	p > 0.05, not analyzed	7.38746	9.84378	4.8159	8.56964	12.9505	3.33443	0.176379	0.760555	0.231908	0.81661	0.999962
WBGene00001536	gcy-9	ZK455.2	p > 0.05, not analyzed	p > 0.05, not analyzed	11.0814	10.9382	7.70578	11.7832	8.63312	10.8363	0.0756054	0.628778	0.120242	0.904292	0.999962
WBGene00001537	gcy-11	C30G4.3	p > 0.05, not analyzed	p > 0.05, not analyzed	40.6299	22.9664	49.1186	41.7772	38.8557	35.8484	0.0408668	0.359057	0.113817	0.909383	0.999962
WBGene00001538	gcy-12	F08B1.2	p > 0.05, not analyzed	p > 0.05, not analyzed	595.479	548.861	560.435	613.061	581.83	538.2	0.0232634	0.123726	0.188023	0.850859	0.999962
WBGene00001541	gcy-15	ZC239.7	p > 0.05, not analyzed	p > 0.05, not analyzed	7.38671	4.37323	2.88873	4.2849	3.4549	0.833905	-0.781083	1.05413	-0.740973	0.45871	0.999962
WBGene00001543	gcy-18	ZK896.8	p > 0.05, not analyzed	p > 0.05, not analyzed	18.4691	10.9386	11.5589	13.9256	19.8555	14.1701	0.24156	0.53505	0.451472	0.65165	0.999962
WBGene00001544	gcy-19	C17F4.6	p > 0.05, not analyzed	p > 0.05, not analyzed	8.32529	4.44715	12.2502	9.80167	16.6806	11.7514	0.603407	0.647058	0.932539	0.351058	0.999962
WBGene00001546	gcy-21	F22E5.3	p > 0.05, not analyzed	p > 0.05, not analyzed	11.0808	1.09362	7.70477	10.7121	5.18086	7.50328	0.234223	0.8149	0.287425	0.773787	0.999962
WBGene00001547	gcy-22	T03D8.5	p > 0.05, not analyzed	p > 0.05, not analyzed	7.2044	5.33186	9.39168	6.12581	8.26663	1.77351	-0.451447	0.829345	-0.544341	0.586207	0.999962
WBGene00001548	gcy-23	T26C12.4	p > 0.05, not analyzed	p > 0.05, not analyzed	11.0799	9.83912	7.70292	9.64106	6.91026	13.3433	0.0732133	0.650028	0.112631	0.910323	0.999962
WBGene00001551	gcy-31	T07D1.1	p > 0.05, not analyzed	p > 0.05, not analyzed	7.26103	6.79436	7.10989	2.29753	4.8053	4.46223	-0.842762	0.857865	-0.982394	0.325906	0.999962
WBGene00001553	gcy-33	F57F5.2	p > 0.05, not analyzed	p > 0.05, not analyzed	15.5679	4.60784	9.06029	10.2628	6.51408	8.93166	-0.0992964	0.703041	-0.141239	0.887682	0.999962
WBGene00001555	gcy-35	T04D3.4	p > 0.05, not analyzed	p > 0.05, not analyzed	12.3884	7.1777	6.01719	10.1195	1.79249	8.72428	-0.40598	0.809079	-0.501781	0.615822	0.999962
WBGene00001558	gdi-1	Y57G11C.10	p > 0.05, not analyzed	p > 0.05, not analyzed	2981.46	2885.08	2626.92	3101.48	3089.9	2970.03	0.109505	0.0985659	1.11099	0.266574	0.999962
WBGene00001559	gei-1	F45H7.2	p > 0.05, not analyzed	p > 0.05, not analyzed	110.924	59.8877	53.656	96.3004	80.8185	95.1488	0.300191	0.282392	1.06303	0.287768	0.999962
WBGene00001560	gei-3	T22H6.6	p > 0.05, not analyzed	p > 0.05, not analyzed	168.444	140.417	121.141	114.517	154.605	153.444	-0.0224934	0.209179	-0.107532	0.914367	0.999962
WBGene00001561	gei-4	W07B3.2	p > 0.05, not analyzed	p > 0.05, not analyzed	585.773	586.617	521.788	541.146	534.375	525.931	-0.0804414	0.123615	-0.650743	0.515213	0.999962
WBGene00001562	lin-66	B0513.1	p > 0.05, not analyzed	p > 0.05, not analyzed	217.19	206.866	137.785	188.569	187.83	195.95	0.0323252	0.194544	0.166159	0.868032	0.999962
WBGene00001563	gei-6	C05C8.4	p > 0.05, not analyzed	p > 0.05, not analyzed	1685.47	1668.65	1341.48	1675.38	1520.78	1509.16	0.00340205	0.119314	0.0285133	0.977253	0.999962
WBGene00001565	gei-8	C14B9.6	p > 0.05, not analyzed	p > 0.05, not analyzed	552.852	612.311	534.832	579.099	623.456	549.701	0.0439286	0.12624	0.347978	0.727857	0.999962
WBGene00001566	acdh-13	C28C12.9	p > 0.05, not analyzed	p > 0.05, not analyzed	796.979	764.498	717.343	837.848	823.813	810.018	0.117904	0.113064	1.04281	0.297039	0.999962
WBGene00001568	snpc-4	F32H2.1	p > 0.05, not analyzed	p > 0.05, not analyzed	2109.1	2166.81	1824.24	2069.01	2037.85	1988.57	-0.000707829	0.106211	-0.00666434	0.994683	0.999962
WBGene00001569	meg-3	F52D2.4	p > 0.05, not analyzed	p > 0.05, not analyzed	1474.42	1464.32	1172.79	1602.64	1548.86	1577.79	0.202875	0.117158	1.73164	0.083337	0.999962
WBGene00001570	gei-13	F58A4.11	p > 0.05, not analyzed	p > 0.05, not analyzed	96.0078	102.688	96.237	73.9173	100.274	61.753	-0.321227	0.24736	-1.29862	0.194073	0.999962
WBGene00001571	gei-14	K01C8.5	p > 0.05, not analyzed	p > 0.05, not analyzed	1311.03	1471.48	1128.57	1378.21	1397.48	1229.33	0.0345527	0.123512	0.279751	0.779668	0.999962
WBGene00001572	gei-15	M03A8.4	p > 0.05, not analyzed	p > 0.05, not analyzed	49.1464	40.1333	36.3903	33.2197	45.277	37.7892	-0.101775	0.332011	-0.30654	0.759193	0.999962
WBGene00001574	gei-17	W10D5.3	p > 0.05, not analyzed	p > 0.05, not analyzed	1901.58	1841.77	1560.73	2034.52	1824.31	1695.53	0.0666238	0.118025	0.56449	0.572421	0.999962
WBGene00001575	gei-18	Y37A1B.15	p > 0.05, not analyzed	p > 0.05, not analyzed	7.35585	2.15099	7.61587	3.2159	7.0267	3.38453	-0.321637	0.913111	-0.352243	0.724656	0.999962
WBGene00001577	gem-4	T12A7.1	p > 0.05, not analyzed	p > 0.05, not analyzed	118.072	127.42	124.841	139.284	109.26	127.19	0.0170412	0.203164	0.0838788	0.933153	0.999962
WBGene00001578	ges-1	R12A1.4	p > 0.05, not analyzed	p > 0.05, not analyzed	247.115	235.955	227.347	273.23	231.03	222.891	0.0317684	0.16135	0.196891	0.843913	0.999962
WBGene00001579	gex-2	F56A11.1	p > 0.05, not analyzed	p > 0.05, not analyzed	871.82	874.312	793.913	894.437	850.884	872.432	0.0439197	0.111915	0.392439	0.694734	0.999962
WBGene00001580	gex-3	F28D1.10	p > 0.05, not analyzed	p > 0.05, not analyzed	1755.77	1862.72	1524.75	1937.81	1710.28	1602.98	0.0297509	0.118713	0.250612	0.802114	0.999962
WBGene00001581	gfi-1	F57F4.3	p > 0.05, not analyzed	p > 0.05, not analyzed	2357.91	2161.71	1893.65	2353.19	1915.79	2018.35	-0.0285807	0.120609	-0.23697	0.81268	0.999962
WBGene00001582	gfi-2	K02A11.1	p > 0.05, not analyzed	p > 0.05, not analyzed	1386.18	1464.43	1233.19	1487.69	1385.14	1350.71	0.0486166	0.111457	0.436192	0.662697	0.999962
WBGene00001583	gfi-3	M163.4	p > 0.05, not analyzed	p > 0.05, not analyzed	194.439	159.368	136.582	174.623	160.914	185.388	0.0924761	0.190719	0.484881	0.627761	0.999962
WBGene00001584	nrde-4	F45E4.10	p > 0.05, not analyzed	p > 0.05, not analyzed	1828.53	1909.49	1720.28	1849.1	1782	1803.56	-0.00614196	0.100246	-0.0612689	0.951145	0.999962
WBGene00001585	gfl-1	M04B2.3	p > 0.05, not analyzed	p > 0.05, not analyzed	365.81	427.888	527.342	460.002	518.911	586.252	0.242991	0.156832	1.54938	0.121291	0.999962
WBGene00001586	lgc-57	C09G5.1	p > 0.05, not analyzed	p > 0.05, not analyzed	4.91764	0	8.63312	5.35746	7.81724	3.35191	0.270218	0.994412	0.271736	0.785825	0.999962
WBGene00001587	lgc-58	C45B2.4	p > 0.05, not analyzed	p > 0.05, not analyzed	6.01724	1.06473	9.83069	0	4.65384	5.62524	-0.662582	1.07142	-0.618414	0.536302	0.999962
WBGene00001588	lgc-56	F09C12.1	p > 0.05, not analyzed	p > 0.05, not analyzed	2.45818	4.3447	7.66842	5.3577	5.21695	5.03244	0.0843204	0.896827	0.0940208	0.925093	0.999962
WBGene00001589	gip-1	H04J21.3	p > 0.05, not analyzed	p > 0.05, not analyzed	881.455	939.617	702.551	899.091	814.094	835.215	0.014785	0.131419	0.112502	0.910425	0.999962
WBGene00001590	lipt-1	C45G3.3	p > 0.05, not analyzed	p > 0.05, not analyzed	179.149	219.066	220.428	202.575	185.561	219.333	-0.028953	0.17264	-0.167707	0.866814	0.999962
WBGene00001591	glc-1	F11A5.10	p > 0.05, not analyzed	p > 0.05, not analyzed	174.512	111.829	183.989	133.945	140.048	131.731	-0.213712	0.213139	-1.00269	0.316011	0.999962
WBGene00001592	glc-2	F25F8.2	p > 0.05, not analyzed	p > 0.05, not analyzed	19.6617	22.7926	30.6577	24.6462	21.7539	32.7326	0.108132	0.417035	0.259289	0.795413	0.999962
WBGene00001594	glc-4	C27H5.8	p > 0.05, not analyzed	p > 0.05, not analyzed	43.031	32.6236	27.8207	26.7871	33.8696	24.2982	-0.275311	0.377123	-0.73003	0.465372	0.999962
WBGene00001595	gld-1	T23G11.3	p > 0.05, not analyzed	p > 0.05, not analyzed	5165.59	5149.39	3863.86	5096.51	4397.57	4848.57	0.0167868	0.124421	0.134919	0.892676	0.999962
WBGene00001596	gld-2	ZC308.1	p > 0.05, not analyzed	p > 0.05, not analyzed	1296.61	1366.95	930.393	1171.17	1236.16	1222.9	0.0159233	0.139239	0.11436	0.908953	0.999962
WBGene00001597	gld-3	T07F8.3	p > 0.05, not analyzed	p > 0.05, not analyzed	3821.92	4095.88	3123.52	4156.66	3708.37	3563.41	0.0498114	0.119735	0.416013	0.677401	0.999962
WBGene00001598	glh-1	T21G5.3	p > 0.05, not analyzed	p > 0.05, not analyzed	2675.62	2831.42	1881.83	2653.58	2234.69	2282.4	-0.043008	0.142881	-0.301005	0.763411	0.999962
WBGene00001599	glh-2	C55B7.1	p > 0.05, not analyzed	p > 0.05, not analyzed	1920.4	2018.76	1272.71	1871.46	1546.52	1613.18	-0.0505287	0.153422	-0.329344	0.741896	0.999962
WBGene00001600	glh-3	B0414.6	p > 0.05, not analyzed	p > 0.05, not analyzed	958.559	978.731	792.336	1032.76	887.123	862.95	0.0278091	0.128195	0.216928	0.828264	0.999962
WBGene00001601	glh-4	T12F5.3	p > 0.05, not analyzed	p > 0.05, not analyzed	443.261	464.902	309.207	426.337	357.39	422.592	-0.0112038	0.16593	-0.0675212	0.946167	0.999962
WBGene00001602	gln-1	C45B2.5	p > 0.05, not analyzed	p > 0.05, not analyzed	194.086	171.233	178.014	159.674	178.653	194.973	-0.0226705	0.177046	-0.128049	0.89811	0.999962
WBGene00001604	gln-3	Y105C5B.28	p > 0.05, not analyzed	p > 0.05, not analyzed	131.072	133.708	149.425	89.222	83.7377	138.022	-0.416371	0.229619	-1.81331	0.0697841	0.999962
WBGene00001606	gln-5	F26D10.10	p > 0.05, not analyzed	p > 0.05, not analyzed	3560.09	3758.59	3022.95	3869.87	3629.47	3781.33	0.12564	0.10817	1.1615	0.24544	0.999962
WBGene00001607	gln-6	C28D4.3	p > 0.05, not analyzed	p > 0.05, not analyzed	7722.31	7896.14	6227.92	7968.4	7037.3	7411.96	0.0373415	0.113178	0.329936	0.741449	0.999962
WBGene00001608	R07B1.8	R07B1.8	p > 0.05, not analyzed	p > 0.05, not analyzed	6.14531	4.3443	4.79246	4.28617	5.21743	2.51642	-0.345727	0.931128	-0.371299	0.710415	0.999962
WBGene00001609	glp-1	F02A9.6	p > 0.05, not analyzed	p > 0.05, not analyzed	5083.56	5064.76	4034.05	5059.11	4704.22	4733.29	0.0318348	0.112315	0.283441	0.776839	0.999962
WBGene00001612	glr-1	C06E1.4	p > 0.05, not analyzed	p > 0.05, not analyzed	12.309	9.83291	13.4742	7.49882	13.8294	10.8474	-0.138204	0.602416	-0.229417	0.818545	0.999962
WBGene00001613	glr-2	B0280.12	p > 0.05, not analyzed	p > 0.05, not analyzed	12.9416	8.00011	12.0827	8.19094	9.91129	10.4813	-0.205512	0.625837	-0.328379	0.742625	0.999962
WBGene00001615	glr-4	C06A8.9	p > 0.05, not analyzed	p > 0.05, not analyzed	18.3751	15.307	23.3473	10.6608	25.1458	28.2292	0.177318	0.488518	0.362972	0.716626	0.999962
WBGene00001616	glr-5	ZC196.7	p > 0.05, not analyzed	p > 0.05, not analyzed	22.1545	27.3052	35.6028	20.3542	21.6152	14.189	-0.611827	0.433942	-1.40993	0.158561	0.999962
WBGene00001617	glr-6	F41B4.4	p > 0.05, not analyzed	p > 0.05, not analyzed	48.2104	55.9901	37.786	56.0451	46.2615	49.8791	0.101449	0.305728	0.331829	0.740018	0.999962
WBGene00001620	glt-1	C12D12.2	p > 0.05, not analyzed	p > 0.05, not analyzed	239.746	210.971	260.944	230.369	227.528	226.219	-0.058457	0.16132	-0.362367	0.717078	0.999962
WBGene00001621	glt-3	K08F4.4	p > 0.05, not analyzed	p > 0.05, not analyzed	47.9577	18.5002	54.7098	41.7866	31.241	31.8184	-0.216166	0.393611	-0.549188	0.582877	0.999962
WBGene00001622	glt-4	T22E5.2	p > 0.05, not analyzed	p > 0.05, not analyzed	71.3962	44.8041	51.9798	39.6362	42.3432	37.5417	-0.487062	0.312784	-1.55719	0.119427	0.999962
WBGene00001623	glt-5	Y53C12A.2	p > 0.05, not analyzed	p > 0.05, not analyzed	17.2133	14.1398	36.46	12.8577	22.5749	26.8068	-0.126065	0.491868	-0.256298	0.797721	0.999962
WBGene00001624	glt-6	R05G6.6	p > 0.05, not analyzed	p > 0.05, not analyzed	9.83633	7.61424	23.9879	15.0006	7.81389	6.70133	-0.523749	0.64696	-0.809554	0.418196	0.999962
WBGene00001625	glt-7	W03G1.1	p > 0.05, not analyzed	p > 0.05, not analyzed	14.7499	6.51852	7.66962	9.64376	3.47717	10.9014	-0.259547	0.716796	-0.362094	0.717282	0.999962
WBGene00001627	gly-2	C55B7.2	p > 0.05, not analyzed	p > 0.05, not analyzed	66.4198	86.0585	74.9185	88.9264	100.562	90.3505	0.298269	0.237877	1.25388	0.209886	0.999962
WBGene00001628	gly-3	ZK688.8	p > 0.05, not analyzed	p > 0.05, not analyzed	783.692	781.789	622.8	813.16	701.536	803.293	0.0841313	0.132008	0.637321	0.523916	0.999962
WBGene00001629	gly-4	Y116F11B.12	p > 0.05, not analyzed	p > 0.05, not analyzed	398.667	428.611	351.439	409.361	337.974	337.608	-0.121038	0.148129	-0.817114	0.413863	0.999962
WBGene00001630	gly-5	Y39E4B.12	p > 0.05, not analyzed	p > 0.05, not analyzed	821.069	894.755	717.394	875.261	806.983	816.005	0.0383643	0.12285	0.312284	0.754825	0.999962
WBGene00001631	gly-6	H38K22.5	p > 0.05, not analyzed	p > 0.05, not analyzed	103.977	109.866	131.47	88.5206	92.2283	109.608	-0.252164	0.220375	-1.14425	0.252519	0.999962
WBGene00001632	gly-7	Y46H3A.6	p > 0.05, not analyzed	p > 0.05, not analyzed	1386.41	1500.39	1096.78	1499.19	1283.53	1271.87	0.0258488	0.13276	0.194703	0.845625	0.999962
WBGene00001633	gly-8	Y66A7A.6	p > 0.05, not analyzed	p > 0.05, not analyzed	151.06	135.356	126.259	98.5944	93.3277	131.2	-0.347188	0.214599	-1.61785	0.105696	0.999962
WBGene00001635	gly-10	Y45F10D.3	p > 0.05, not analyzed	p > 0.05, not analyzed	1225.84	1332.5	961.446	1253.41	1157.77	1038.68	-0.028383	0.135836	-0.208951	0.834487	0.999962
WBGene00001636	gly-11	Y75B8A.9	p > 0.05, not analyzed	p > 0.05, not analyzed	60.262	68.5934	77.7721	91.0713	79.798	87.044	0.313177	0.246562	1.27018	0.204021	0.999962
WBGene00001637	gly-12	F48E3.1	p > 0.05, not analyzed	p > 0.05, not analyzed	54.9773	48.7611	41.2589	51.1684	61.4077	58.7319	0.249556	0.292367	0.85357	0.393343	0.999962
WBGene00001638	gly-13	B0416.6	p > 0.05, not analyzed	p > 0.05, not analyzed	147.524	168.507	165.932	159.653	178.085	153.369	0.0255778	0.18214	0.140429	0.888321	0.999962
WBGene00001639	gly-14	M01F1.1	p > 0.05, not analyzed	p > 0.05, not analyzed	25.7993	11.9267	27.7638	9.64458	11.3239	15.121	-0.852174	0.525379	-1.62202	0.104799	0.999962
WBGene00001644	gly-19	F22D6.12	p > 0.05, not analyzed	p > 0.05, not analyzed	23.7484	16.5745	34.0361	36.026	29.2737	41.0661	0.504957	0.397981	1.2688	0.204514	0.999962
WBGene00001646	gna-1	B0024.12	p > 0.05, not analyzed	p > 0.05, not analyzed	17.0336	6.27346	19.5984	17.1657	10.854	13.0199	-0.0723389	0.575847	-0.125622	0.900031	0.999962
WBGene00001647	gna-2	T23G11.2	p > 0.05, not analyzed	p > 0.05, not analyzed	1621.29	1636.28	1611.69	1787.75	1735.94	1679.16	0.0953465	0.0983855	0.969111	0.33249	0.999962
WBGene00001648	goa-1	C26C6.2	p > 0.05, not analyzed	p > 0.05, not analyzed	874.475	818.994	708.727	869.988	854.984	804.959	0.0758689	0.121713	0.623343	0.533059	0.999962
WBGene00001649	gob-1	H13N06.3	p > 0.05, not analyzed	p > 0.05, not analyzed	415.677	386.488	348.515	325.715	359.12	380.844	-0.106979	0.14312	-0.747476	0.454776	0.999962
WBGene00001650	gon-1	F25H8.3	p > 0.05, not analyzed	p > 0.05, not analyzed	267.552	263.389	237.34	230.089	228.653	257.841	-0.0980141	0.156904	-0.624675	0.532185	0.999962
WBGene00001651	gon-2	T01H8.5	p > 0.05, not analyzed	p > 0.05, not analyzed	1056.05	885.569	859.4	987.707	859.721	880.627	-0.037936	0.124172	-0.305511	0.759977	0.999962
WBGene00001653	gon-4	K04D7.5	p > 0.05, not analyzed	p > 0.05, not analyzed	2860.56	2898.9	2470.5	2888.97	2811.33	2677.11	0.0258542	0.104485	0.247444	0.804564	0.999962
WBGene00001660	gop-1	C34E10.3	p > 0.05, not analyzed	p > 0.05, not analyzed	738.522	737.388	643.827	773.453	787.497	675.943	0.0780755	0.12431	0.628069	0.529959	0.999962
WBGene00001661	gop-2	C34E10.2	p > 0.05, not analyzed	p > 0.05, not analyzed	601.552	677.923	756.764	699.849	803.68	842.99	0.204039	0.13144	1.55233	0.120582	0.999962
WBGene00001662	gop-3	C34E10.1	p > 0.05, not analyzed	p > 0.05, not analyzed	737.329	805.404	854.633	858.327	823.099	854.341	0.0795715	0.11512	0.691203	0.489438	0.999962
WBGene00001663	gpa-1	T19C4.6	p > 0.05, not analyzed	p > 0.05, not analyzed	17.889	21.5174	25.8014	27.9989	24.7825	31.1518	0.364735	0.412842	0.883474	0.37698	0.999962
WBGene00001664	gpa-2	F38E1.5	p > 0.05, not analyzed	p > 0.05, not analyzed	8.60017	3.25338	5.74501	3.21483	5.22538	8.39915	-0.0370711	0.855035	-0.0433562	0.965418	0.999962
WBGene00001665	gpa-3	E02C12.5	p > 0.05, not analyzed	p > 0.05, not analyzed	4.07098	3.14071	5.5438	10.6577	5.86936	10.2302	1.05168	0.809078	1.29986	0.19365	0.999962
WBGene00001666	gpa-4	T07A9.7	p > 0.05, not analyzed	p > 0.05, not analyzed	19.6759	18.5038	9.59949	15.0002	23.4261	20.9296	0.333695	0.500563	0.66664	0.505002	0.999962
WBGene00001669	gpa-7	R10H10.5	p > 0.05, not analyzed	p > 0.05, not analyzed	40.5559	45.6012	47.9144	34.2898	52.1907	31.8833	-0.179769	0.334079	-0.538104	0.590505	0.999962
WBGene00001671	gpa-9	F56H9.4	p > 0.05, not analyzed	p > 0.05, not analyzed	7.29979	3.36674	11.4172	9.57474	6.80188	9.36145	0.201607	0.732357	0.275285	0.783098	0.999962
WBGene00001674	gpa-12	F18G5.3	p > 0.05, not analyzed	p > 0.05, not analyzed	28.2275	27.7436	44.8166	40.6581	41.5115	38.875	0.252933	0.351239	0.720116	0.471453	0.999962
WBGene00001675	gpa-13	F18E2.5	p > 0.05, not analyzed	p > 0.05, not analyzed	4.57503	7.06623	3.30989	4.9515	6.4873	3.91024	0.0317739	0.889229	0.035732	0.971496	0.999962
WBGene00001676	gpa-14	B0207.3	p > 0.05, not analyzed	p > 0.05, not analyzed	4.91358	3.25129	3.8283	4.28656	5.2288	5.04235	0.290228	0.936998	0.309742	0.756757	0.999962
WBGene00001678	gpa-16	Y95B8A.5	p > 0.05, not analyzed	p > 0.05, not analyzed	859.528	818.441	786.577	815.064	786.004	666.207	-0.12111	0.123135	-0.983557	0.325334	0.999962
WBGene00001679	gpb-1	F13D12.7	p > 0.05, not analyzed	p > 0.05, not analyzed	275.171	315.961	228.501	269.21	267.674	318.813	0.0653575	0.166941	0.3915	0.695428	0.999962
WBGene00001680	gpb-2	F52A8.2	p > 0.05, not analyzed	p > 0.05, not analyzed	80.3868	90.51	81.257	67.1836	69.245	134.94	0.0844481	0.281512	0.299981	0.764192	0.999962
WBGene00001681	gpc-1	K02A4.2	p > 0.05, not analyzed	p > 0.05, not analyzed	3.66369	3.17964	6.59599	4.28992	3.56705	0.857286	-0.658023	1.06758	-0.616371	0.53765	0.999962
WBGene00001682	gpc-2	F08B6.2	p > 0.05, not analyzed	p > 0.05, not analyzed	320.664	328.825	452.954	357.313	424.226	511.734	0.229087	0.173408	1.32108	0.186474	0.999962
WBGene00001683	gpd-1	T09F3.3	p > 0.05, not analyzed	p > 0.05, not analyzed	4878.33	5334.4	4312.21	5501.54	4896.62	5189.3	0.101899	0.108113	0.942523	0.345925	0.999962
WBGene00001684	gpd-2	K10B3.8	p > 0.05, not analyzed	p > 0.05, not analyzed	2011.75	1616.33	1933.93	1652.68	1738.81	1846.33	-0.0860946	0.115063	-0.748242	0.454314	0.999962
WBGene00001685	gpd-3	K10B3.7	p > 0.05, not analyzed	p > 0.05, not analyzed	2738.43	2190.15	2733.39	2027.79	2195.91	2461.39	-0.196311	0.121523	-1.61542	0.106219	0.999962
WBGene00001686	gpd-4	F33H1.2	p > 0.05, not analyzed	p > 0.05, not analyzed	3345.65	3591.12	2779.37	3773.78	3251.56	3463.75	0.110551	0.117428	0.941436	0.346482	0.999962
WBGene00001687	gpn-1	F59D12.4	p > 0.05, not analyzed	p > 0.05, not analyzed	20.9034	21.7598	15.3546	6.42877	21.7003	7.53751	-0.684681	0.568634	-1.20408	0.228559	0.999962
WBGene00001688	gpr-1	F22B7.13	p > 0.05, not analyzed	p > 0.05, not analyzed	389.693	430.437	405.671	463.962	391.851	441.733	0.0804093	0.136096	0.590828	0.554636	0.999962
WBGene00001689	gpr-2	C38C10.4	p > 0.05, not analyzed	p > 0.05, not analyzed	489.257	519.522	475.652	556.114	494.42	510.505	0.0717217	0.1269	0.565184	0.571949	0.999962
WBGene00001690	grd-1	R08B4.1	p > 0.05, not analyzed	p > 0.05, not analyzed	11.0321	11.9799	15.3441	7.46474	12.3494	6.64294	-0.539481	0.621021	-0.868699	0.385012	0.999962
WBGene00001692	grd-3	W05E7.1	p > 0.05, not analyzed	p > 0.05, not analyzed	458.51	419.442	657.867	465.4	461.582	550.751	-0.0572796	0.167461	-0.342048	0.732315	0.999962
WBGene00001693	grd-4	T01B10.1	p > 0.05, not analyzed	p > 0.05, not analyzed	9.7917	10.6877	20.852	13.9387	12.3766	13.6142	-0.0669979	0.563102	-0.11898	0.905291	0.999962
WBGene00001694	grd-5	F41E6.2	p > 0.05, not analyzed	p > 0.05, not analyzed	387.285	358.845	552.002	416.235	444.285	485.364	0.0502191	0.165898	0.302711	0.76211	0.999962
WBGene00001699	grd-10	F09D12.1	p > 0.05, not analyzed	p > 0.05, not analyzed	12.214	12.7254	11.3117	12.8696	11.5865	10.2825	-0.0640763	0.578676	-0.110729	0.911831	0.999962
WBGene00001700	grd-11	K02E2.2	p > 0.05, not analyzed	p > 0.05, not analyzed	9.84784	7.64974	2.88783	6.42748	4.32058	2.5027	-0.622871	0.880938	-0.707054	0.479533	0.999962
WBGene00001701	grd-12	F02D8.2	p > 0.05, not analyzed	p > 0.05, not analyzed	4.90915	3.23987	1.90947	3.21538	6.12227	2.52906	0.263369	1.05434	0.249795	0.802746	0.999962
WBGene00001702	grd-13	W05E7.3	p > 0.05, not analyzed	p > 0.05, not analyzed	17.0919	16.9375	17.8881	21.4506	8.92872	18.0227	-0.11052	0.513983	-0.215027	0.829746	0.999962
WBGene00001703	grd-14	T01B10.2	p > 0.05, not analyzed	p > 0.05, not analyzed	28.0711	19.0336	43.2742	18.2336	38.4379	26.6315	-0.117531	0.429371	-0.273729	0.784293	0.999962
WBGene00001705	grd-16	Y69A2AL.1	p > 0.05, not analyzed	p > 0.05, not analyzed	2.45647	3.24961	3.82693	3.21499	3.4877	4.20388	0.18866	1.06098	0.177817	0.858867	0.999962
WBGene00001707	grh-1	Y48G8AR.1	p > 0.05, not analyzed	p > 0.05, not analyzed	58.2672	46.4449	52.9885	47.5996	38.4116	35.7053	-0.374547	0.30956	-1.20993	0.226305	0.999962
WBGene00001708	grk-1	F19C6.1	p > 0.05, not analyzed	p > 0.05, not analyzed	297.853	281.779	227.082	307.456	287.061	271.269	0.103909	0.159861	0.649992	0.515697	0.999962
WBGene00001709	grk-2	W02B3.2	p > 0.05, not analyzed	p > 0.05, not analyzed	107.072	113.555	97.1654	121.056	109.839	113.543	0.116355	0.20965	0.554998	0.578896	0.999962
WBGene00001710	grl-1	C24G6.7	p > 0.05, not analyzed	p > 0.05, not analyzed	8.59387	10.8135	7.64475	6.43043	2.62036	6.73643	-0.781925	0.766624	-1.01996	0.307748	0.999962
WBGene00001713	grl-4	F42C5.7	p > 0.05, not analyzed	p > 0.05, not analyzed	41.6405	37.4951	32.279	36.4521	36.1575	38.2093	-0.00182911	0.338134	-0.00540943	0.995684	0.999962
WBGene00001714	grl-5	Y47D7A.5	p > 0.05, not analyzed	p > 0.05, not analyzed	23.2826	8.58851	11.4095	13.9365	5.27978	12.7123	-0.432588	0.622454	-0.694971	0.487074	0.999962
WBGene00001716	grl-7	T02E9.2	p > 0.05, not analyzed	p > 0.05, not analyzed	43.9196	37.0574	37.9161	22.2781	43.0778	32.326	-0.272264	0.360793	-0.754628	0.450473	0.999962
WBGene00001717	grl-8	ZC487.5	p > 0.05, not analyzed	p > 0.05, not analyzed	8.56866	4.27681	3.79235	4.28877	1.76734	0	-1.50027	1.14207	-1.31365	0.188966	0.999962
WBGene00001719	grl-10	C26F1.5	p > 0.05, not analyzed	p > 0.05, not analyzed	24.5246	23.6798	24.7654	21.4387	17.5523	19.4472	-0.324028	0.430841	-0.752081	0.452002	0.999962
WBGene00001723	grl-14	T03D8.4	p > 0.05, not analyzed	p > 0.05, not analyzed	6.18783	3.20034	0.942165	3.23954	3.51477	5.08372	0.24127	1.06686	0.226149	0.821085	0.999962
WBGene00001724	grl-15	Y75B8A.20	p > 0.05, not analyzed	p > 0.05, not analyzed	14.7148	19.3744	30.4805	17.1509	17.5523	15.2195	-0.386023	0.480303	-0.803707	0.421566	0.999962
WBGene00001725	grl-16	Y65B4BR.6	p > 0.05, not analyzed	p > 0.05, not analyzed	89.4342	71.7502	92.5482	85.0936	73.0996	64.0332	-0.197457	0.249208	-0.792339	0.428163	0.999962
WBGene00001727	grl-18	T05C3.4	p > 0.05, not analyzed	p > 0.05, not analyzed	1.22852	4.33672	2.87199	6.42974	2.61338	3.36043	0.524157	1.09092	0.480471	0.630893	0.999962
WBGene00001730	grl-21	ZC168.5	p > 0.05, not analyzed	p > 0.05, not analyzed	4.88948	3.19057	4.72279	6.4343	6.21997	3.41854	0.321806	0.909928	0.353661	0.723593	0.999962
WBGene00001731	grl-22	W03A5.3	p > 0.05, not analyzed	p > 0.05, not analyzed	7.32201	7.39868	15.0472	0	2.68296	7.73482	-1.48098	0.898317	-1.64862	0.0992259	0.999962
WBGene00001740	gro-1	ZC395.6	p > 0.05, not analyzed	p > 0.05, not analyzed	310.802	362.06	324.5	319.346	330.209	357.935	0.0151468	0.144006	0.105182	0.916232	0.999962
WBGene00001743	grp-1	K06H7.4	p > 0.05, not analyzed	p > 0.05, not analyzed	1011.58	1041.81	1108.21	1102.61	1141.45	1108.65	0.084123	0.106454	0.790226	0.429396	0.999962
WBGene00001744	gars-1	T10F2.1	p > 0.05, not analyzed	p > 0.05, not analyzed	1480.73	1701.2	1505.45	1757.13	1535.98	1711.31	0.0940194	0.110537	0.850573	0.395007	0.999962
WBGene00001745	gsa-1	R06A10.2	p > 0.05, not analyzed	p > 0.05, not analyzed	40.8136	32.9994	37.9484	29.7338	37.9692	18.7606	-0.37961	0.380921	-0.996559	0.318979	0.999962
WBGene00001746	gsk-3	Y18D10A.5	p > 0.05, not analyzed	p > 0.05, not analyzed	239.877	255.022	178.708	187.492	185.434	207.389	-0.210878	0.180961	-1.16532	0.243889	0.999962
WBGene00001747	gsp-1	F29F11.6	p > 0.05, not analyzed	p > 0.05, not analyzed	904.922	925.591	709.038	855.038	736.309	855.325	-0.0527886	0.134123	-0.393583	0.693889	0.999962
WBGene00001748	gsp-2	F56C9.1	p > 0.05, not analyzed	p > 0.05, not analyzed	3264.57	3461	3248.83	3450.34	3204.52	3234.65	-0.0125482	0.0950568	-0.132007	0.894979	0.999962
WBGene00001749	gst-1	R107.7	p > 0.05, not analyzed	p > 0.05, not analyzed	1846.57	2054.65	2378.63	2155.2	2476.5	2441.25	0.171146	0.118722	1.44157	0.149424	0.999962
WBGene00001751	gst-3	K08F4.11	p > 0.05, not analyzed	p > 0.05, not analyzed	6.11629	3.19931	7.57097	4.28914	6.20229	5.11531	-0.113081	0.859338	-0.13159	0.895308	0.999962
WBGene00001752	gst-4	K08F4.7	p > 0.05, not analyzed	p > 0.05, not analyzed	85.6388	46.9455	81.4149	58.9748	48.7084	64.7664	-0.310059	0.293149	-1.05768	0.290201	0.999962
WBGene00001753	gst-5	R03D7.6	p > 0.05, not analyzed	p > 0.05, not analyzed	70.7569	54.64	123.848	98.7978	109.833	122.07	0.41957	0.27519	1.52466	0.127345	0.999962
WBGene00001754	gst-6	F11G11.3	p > 0.05, not analyzed	p > 0.05, not analyzed	24.4793	12.8252	18.9564	18.2275	12.3766	17.0178	-0.23829	0.499675	-0.476891	0.63344	0.999962
WBGene00001757	gst-9	R05F9.5	p > 0.05, not analyzed	p > 0.05, not analyzed	6.11542	10.6586	9.46013	19.3015	13.2982	17.912	0.931021	0.58082	1.60294	0.108948	0.999962
WBGene00001758	gst-10	Y45G12C.2	p > 0.05, not analyzed	p > 0.05, not analyzed	99.3932	79.4692	95.8423	87.7654	110.08	80.6598	0.0248208	0.236944	0.104754	0.916571	0.999962
WBGene00001759	gst-11	R11G1.3	p > 0.05, not analyzed	p > 0.05, not analyzed	2.44906	4.28262	6.64293	7.50499	6.17701	2.54863	0.244365	0.923515	0.264603	0.791315	0.999962
WBGene00001760	gst-12	F37B1.2	p > 0.05, not analyzed	p > 0.05, not analyzed	7.35106	8.58249	8.55293	15.0089	14.0896	6.78416	0.538643	0.651768	0.826434	0.408558	0.999962
WBGene00001761	gst-13	T26C5.1	p > 0.05, not analyzed	p > 0.05, not analyzed	151.797	152.93	158.355	112.579	113.967	141.168	-0.330497	0.195551	-1.69009	0.0910115	0.999962
WBGene00001763	gst-15	F37B1.4	p > 0.05, not analyzed	p > 0.05, not analyzed	18.3572	9.6144	17.0551	9.65002	10.6137	15.3224	-0.329555	0.564387	-0.583916	0.559277	0.999962
WBGene00001764	gst-16	F37B1.5	p > 0.05, not analyzed	p > 0.05, not analyzed	28.1259	29.8239	25.5302	23.5913	29.2766	36.6993	0.110437	0.386823	0.285498	0.775263	0.999962
WBGene00001768	gst-20	Y48E1B.10	p > 0.05, not analyzed	p > 0.05, not analyzed	62.4576	51.4119	67.397	78.2653	58.2165	56.05	0.079415	0.278825	0.28482	0.775782	0.999962
WBGene00001769	gst-21	ZK697.6	p > 0.05, not analyzed	p > 0.05, not analyzed	4.00995	4.65353	4.12977	4.69193	5.8147	10.3879	0.72045	0.859155	0.838557	0.401718	0.999962
WBGene00001772	gst-24	F37B1.1	p > 0.05, not analyzed	p > 0.05, not analyzed	11.0119	3.20214	8.5226	4.28902	7.08186	2.55563	-0.700756	0.852118	-0.822369	0.410867	0.999962
WBGene00001776	gst-28	Y53F4B.31	p > 0.05, not analyzed	p > 0.05, not analyzed	35.3034	31.0306	43.2862	36.1209	29.1178	30.4609	-0.205175	0.355727	-0.576778	0.564089	0.999962
WBGene00001778	gst-30	ZK546.11	p > 0.05, not analyzed	p > 0.05, not analyzed	3.67038	5.33554	10.4147	2.14453	6.19826	12.7811	0.12275	0.838984	0.146308	0.883678	0.999962
WBGene00001780	gst-32	Y53F4B.37	p > 0.05, not analyzed	p > 0.05, not analyzed	1.22216	2.12582	2.83252	7.50685	2.66733	7.69575	1.50265	1.07058	1.40358	0.160443	0.999962
WBGene00001783	gst-35	Y1H11.2	p > 0.05, not analyzed	p > 0.05, not analyzed	11.0162	7.48273	13.2711	6.4332	13.2581	1.7015	-0.574874	0.749831	-0.766671	0.443277	0.999962
WBGene00001784	gst-36	R07B1.4	p > 0.05, not analyzed	p > 0.05, not analyzed	176.231	157.043	180.98	139.389	179.539	152.366	-0.123739	0.186299	-0.664194	0.506566	0.999962
WBGene00001786	gst-38	F35E8.8	p > 0.05, not analyzed	p > 0.05, not analyzed	6.12538	2.14495	4.75058	2.14415	7.92796	1.69651	-0.12863	1.03286	-0.124538	0.900889	0.999962
WBGene00001787	gst-39	Y53F4B.33	p > 0.05, not analyzed	p > 0.05, not analyzed	46.4703	28.762	38.7712	33.2422	45.2402	34.1354	-0.0106282	0.349312	-0.0304262	0.975727	0.999962
WBGene00001789	gst-41	R13D7.7	p > 0.05, not analyzed	p > 0.05, not analyzed	15.9117	5.34407	16.1134	11.7943	13.26	10.2102	-0.08382	0.607185	-0.138047	0.890203	0.999962
WBGene00001790	gst-42	D1053.1	p > 0.05, not analyzed	p > 0.05, not analyzed	69.9141	65.7265	87.6954	60.0259	74.517	76.8715	-0.0788537	0.258953	-0.30451	0.76074	0.999962
WBGene00001791	gst-43	Y71F9AL.5	p > 0.05, not analyzed	p > 0.05, not analyzed	61.1366	60.688	83.1856	57.9067	71.0038	64.8878	-0.0841356	0.268883	-0.312908	0.75435	0.999962
WBGene00001792	gst-44	F13A7.10	p > 0.05, not analyzed	p > 0.05, not analyzed	11.0394	17.2417	15.2526	21.4377	16.6548	21.1164	0.434527	0.494219	0.879219	0.379282	0.999962
WBGene00001793	gsy-1	Y46G5A.31	p > 0.05, not analyzed	p > 0.05, not analyzed	1806.31	2021.55	1477.79	1938.04	1612.63	1742.83	-0.00322534	0.129617	-0.0248837	0.980148	0.999962
WBGene00001794	gta-1	K04D7.3	p > 0.05, not analyzed	p > 0.05, not analyzed	2049.79	1858.02	2395.38	2117.41	2127.63	2047.38	-0.00306249	0.114584	-0.026727	0.978678	0.999962
WBGene00001796	gtl-2	F54D1.5	p > 0.05, not analyzed	p > 0.05, not analyzed	46.7973	27.3675	52.0428	41.7753	50.0315	43.3145	0.0979298	0.335172	0.292178	0.770151	0.999962
WBGene00001803	lite-1	C14F11.3	p > 0.05, not analyzed	p > 0.05, not analyzed	4.91574	5.42818	7.66578	9.64406	6.95945	4.19554	0.183024	0.795374	0.230111	0.818006	0.999962
WBGene00001805	gur-4	K09E4.5	p > 0.05, not analyzed	p > 0.05, not analyzed	7.36928	2.16627	4.78345	5.35833	2.61595	4.20412	-0.232986	0.964678	-0.241517	0.809154	0.999962
WBGene00001806	gur-5	ZK622.2	p > 0.05, not analyzed	p > 0.05, not analyzed	4.91268	4.33194	4.78299	6.43003	6.10474	5.04556	0.322526	0.860036	0.375014	0.70765	0.999962
WBGene00001808	gut-2	T10G3.6	p > 0.05, not analyzed	p > 0.05, not analyzed	258.303	285.231	432.661	303.129	350.763	542.665	0.293279	0.216642	1.35375	0.175817	0.999962
WBGene00001811	haf-1	C30H6.6	p > 0.05, not analyzed	p > 0.05, not analyzed	92.2538	115.491	109.509	130.71	111.812	122.958	0.199334	0.210966	0.944863	0.344729	0.999962
WBGene00001812	haf-2	F43E2.4	p > 0.05, not analyzed	p > 0.05, not analyzed	1701.86	1574.77	1262.71	1755.89	1459.8	1489.24	0.0520356	0.130969	0.397313	0.691137	0.999962
WBGene00001813	haf-3	F57A10.3	p > 0.05, not analyzed	p > 0.05, not analyzed	1012.44	1048.59	875.377	1101.37	970.343	990.815	0.0607664	0.119188	0.509837	0.610166	0.999962
WBGene00001815	hmt-1	W09D6.6	p > 0.05, not analyzed	p > 0.05, not analyzed	910.629	884.035	748.239	951.324	831.511	814.31	0.0306319	0.12553	0.244021	0.807215	0.999962
WBGene00001816	haf-6	Y48G8AL.11	p > 0.05, not analyzed	p > 0.05, not analyzed	583.413	544.766	309.34	366.128	458.071	360.213	-0.270468	0.198061	-1.36558	0.172071	0.999962
WBGene00001817	haf-7	Y50E8A.16	p > 0.05, not analyzed	p > 0.05, not analyzed	144.009	113.604	115.478	116.768	130.539	132.694	0.0325695	0.204373	0.159363	0.873383	0.999962
WBGene00001819	haf-9	ZK484.2	p > 0.05, not analyzed	p > 0.05, not analyzed	266.276	212.443	212.454	228.445	210.668	185.86	-0.144645	0.172913	-0.836518	0.402864	0.999962
WBGene00001820	ham-1	F53B2.6	p > 0.05, not analyzed	p > 0.05, not analyzed	36.879	24.9988	41.237	28.9307	44.3137	36.8826	0.0985156	0.36294	0.271438	0.786054	0.999962
WBGene00001821	ham-2	C07A12.1	p > 0.05, not analyzed	p > 0.05, not analyzed	17.018	25.0557	17.3559	14.5377	21.5258	19.7031	-0.0753958	0.470248	-0.160332	0.872619	0.999962
WBGene00001823	hap-1	ZC395.7	p > 0.05, not analyzed	p > 0.05, not analyzed	167.403	151.884	195.343	185.527	175.29	202.79	0.129318	0.180825	0.715156	0.474512	0.999962
WBGene00001824	hbl-1	F13D11.2	p > 0.05, not analyzed	p > 0.05, not analyzed	147.902	108.66	139.899	123.641	156.045	80.4032	-0.140107	0.244929	-0.572032	0.5673	0.999962
WBGene00001827	hcf-1	C46A5.9	p > 0.05, not analyzed	p > 0.05, not analyzed	3782.09	3749.94	3167.28	3917.69	3728.03	3605.43	0.0727715	0.105727	0.688297	0.491266	0.999962
WBGene00001828	hch-1	F40E10.1	p > 0.05, not analyzed	p > 0.05, not analyzed	45.5023	31.5702	54.7231	48.2145	47.7122	26.7861	-0.112518	0.353498	-0.318298	0.750259	0.999962
WBGene00001829	hcp-1	ZK1055.1	p > 0.05, not analyzed	p > 0.05, not analyzed	5018.68	5095.88	3816.1	4790.18	4239.64	4519.64	-0.0398216	0.12202	-0.326354	0.744157	0.999962
WBGene00001830	hcp-2	T06E4.1	p > 0.05, not analyzed	p > 0.05, not analyzed	3711.39	3997.3	3200.69	3993.37	3605.49	3557.24	0.0322942	0.111251	0.290282	0.771601	0.999962
WBGene00001831	hcp-3	F58A4.3	p > 0.05, not analyzed	p > 0.05, not analyzed	977.564	1212.14	1099.03	1107.26	1096.74	1087.2	0.000252817	0.115611	0.00218678	0.998255	0.999962
WBGene00001832	hcp-4	T03F1.9	p > 0.05, not analyzed	p > 0.05, not analyzed	2376.45	2433.54	2050.92	2350.42	2035.26	1989.67	-0.106046	0.114003	-0.930206	0.352265	0.999962
WBGene00001833	hcp-6	Y110A7A.1	p > 0.05, not analyzed	p > 0.05, not analyzed	3240.44	3198.11	2585.79	3257.4	2852.3	3009.39	0.0152985	0.115422	0.132544	0.894554	0.999962
WBGene00001834	hda-1	C53A5.3	p > 0.05, not analyzed	p > 0.05, not analyzed	1624.32	1571.1	1288.85	1643.62	1498.15	1562.74	0.0698334	0.11747	0.594477	0.552193	0.999962
WBGene00001835	hda-2	C08B11.2	p > 0.05, not analyzed	p > 0.05, not analyzed	724.047	680.363	724.975	842.207	773.363	684.039	0.109608	0.123354	0.888563	0.374238	0.999962
WBGene00001836	hda-3	R06C1.1	p > 0.05, not analyzed	p > 0.05, not analyzed	741.328	776.299	658.02	777.904	680.993	709.789	-0.00468534	0.123234	-0.0380199	0.969672	0.999962
WBGene00001837	hda-4	C10E2.3	p > 0.05, not analyzed	p > 0.05, not analyzed	45.1799	54.5401	53.5097	56.5842	56.8666	61.1809	0.188508	0.283411	0.665142	0.50596	0.999962
WBGene00001838	hda-10	Y51H1A.5	p > 0.05, not analyzed	p > 0.05, not analyzed	349.098	408.57	274.224	370.746	298.11	321.959	-0.0584888	0.168533	-0.347046	0.728557	0.999962
WBGene00001839	hdl-1	ZK829.2	p > 0.05, not analyzed	p > 0.05, not analyzed	1.23077	4.36824	3.84859	6.42769	3.45891	5.84322	0.708704	0.99621	0.711401	0.476836	0.999962
WBGene00001840	hel-1	C26D10.2	p > 0.05, not analyzed	p > 0.05, not analyzed	5919.2	6295.64	5885.12	6657.21	6218.26	6698.25	0.112897	0.0925064	1.22042	0.222305	0.999962
WBGene00001842	her-1	ZK287.8	p > 0.05, not analyzed	p > 0.05, not analyzed	7.34287	9.6144	8.52757	3.21667	7.07577	7.66119	-0.490741	0.750773	-0.653649	0.513338	0.999962
WBGene00001844	hid-1	K02E10.2	p > 0.05, not analyzed	p > 0.05, not analyzed	219.545	181.664	182.141	193.309	207.924	179.725	-0.00308119	0.174027	-0.0177053	0.985874	0.999962
WBGene00001851	hif-1	F38A6.3	p > 0.05, not analyzed	p > 0.05, not analyzed	871.074	725.833	692.359	685.815	678.577	703.258	-0.145103	0.125965	-1.15193	0.249352	0.999962
WBGene00001852	hil-1	C30G7.1	p > 0.05, not analyzed	p > 0.05, not analyzed	31.8677	34.3841	36.1521	43.9521	43.0794	49.1161	0.409267	0.327596	1.24931	0.211553	0.999962
WBGene00001853	hil-2	Y73B6BL.9	p > 0.05, not analyzed	p > 0.05, not analyzed	646.914	687.085	712.531	640.809	594.584	785.552	-0.0180542	0.134354	-0.134378	0.893104	0.999962
WBGene00001854	hil-3	F22F1.1	p > 0.05, not analyzed	p > 0.05, not analyzed	100.465	92.2617	117.84	77.1887	95.9854	118.723	-0.0862338	0.236029	-0.365352	0.714849	0.999962
WBGene00001855	hil-4	C18G1.5	p > 0.05, not analyzed	p > 0.05, not analyzed	2991.65	3399.77	2442.44	3190.13	2807.9	3157.62	0.0518474	0.125947	0.41166	0.680589	0.999962
WBGene00001856	hil-5	B0414.3	p > 0.05, not analyzed	p > 0.05, not analyzed	3208.91	3860.76	2853.28	3399.49	3485.56	3525.42	0.0694325	0.118294	0.586949	0.557238	0.999962
WBGene00001858	hil-7	C01B10.5	p > 0.05, not analyzed	p > 0.05, not analyzed	83.0878	90.7367	98.3316	76.5225	115.238	73.7302	-0.0371924	0.249077	-0.149321	0.881301	0.999962
WBGene00001859	hil-8	T05E8.2	p > 0.05, not analyzed	p > 0.05, not analyzed	18.4408	22.8315	25.8981	19.2869	12.161	25.9789	-0.230626	0.466096	-0.494803	0.620739	0.999962
WBGene00001860	him-1	F28B3.7	p > 0.05, not analyzed	p > 0.05, not analyzed	4636.25	4503.18	3730.39	5115.51	4393.56	4893.89	0.162511	0.113454	1.43239	0.152031	0.999962
WBGene00001862	him-3	ZK381.1	p > 0.05, not analyzed	p > 0.05, not analyzed	908.148	1113.82	1148.45	1144.7	1264.34	1336.96	0.240065	0.12424	1.93227	0.0533258	0.999962
WBGene00001863	him-4	F15G9.4	p > 0.05, not analyzed	p > 0.05, not analyzed	1638.77	1300.02	975.684	642.606	1113.39	588.417	-0.739224	0.37253	-1.98434	0.0472182	0.999962
WBGene00001865	him-6	T04A11.6	p > 0.05, not analyzed	p > 0.05, not analyzed	1675.36	1670.92	1311.07	1710.78	1555.41	1430.72	0.0124606	0.12585	0.0990111	0.921129	0.999962
WBGene00001867	him-8	T07G12.12	p > 0.05, not analyzed	p > 0.05, not analyzed	618.011	686.748	679.329	574.866	820.956	793.678	0.141235	0.145518	0.970571	0.331762	0.999962
WBGene00001869	him-10	R12B2.4	p > 0.05, not analyzed	p > 0.05, not analyzed	1425.74	1422.87	1289.24	1412.29	1459.9	1334.45	0.0242277	0.106145	0.228251	0.819451	0.999962
WBGene00001872	him-14	ZK1127.11	p > 0.05, not analyzed	p > 0.05, not analyzed	673.148	761.893	707.906	777.768	740.565	740.732	0.0751951	0.116238	0.646904	0.517694	0.999962
WBGene00001874	him-17	T09E8.2	p > 0.05, not analyzed	p > 0.05, not analyzed	2379.44	2428.06	2056.99	2523.87	2286.63	2292.63	0.0494161	0.107913	0.457926	0.647005	0.999962
WBGene00001875	his-1	T10C6.14	p > 0.05, not analyzed	p > 0.05, not analyzed	501.135	580.842	783.257	521.211	705.097	857.122	0.158659	0.183135	0.86635	0.386298	0.999962
WBGene00001877	his-3	T10C6.12	p > 0.05, not analyzed	p > 0.05, not analyzed	727.143	808.661	932.901	687.838	802.641	1170.51	0.108387	0.170654	0.635131	0.525343	0.999962
WBGene00001878	his-4	T10C6.11	p > 0.05, not analyzed	p > 0.05, not analyzed	705.771	814.825	804.093	796.178	860.474	1061.02	0.22534	0.134297	1.67793	0.0933617	0.999962
WBGene00001879	his-5	F45F2.3	p > 0.05, not analyzed	p > 0.05, not analyzed	477.215	527.226	648.523	549.095	657.52	714.727	0.215694	0.149169	1.44597	0.148185	0.999962
WBGene00001880	his-6	F45F2.13	p > 0.05, not analyzed	p > 0.05, not analyzed	589.635	604.763	677.834	604.122	709.35	875.848	0.22624	0.146016	1.54943	0.121279	0.999962
WBGene00001881	his-7	F45F2.4	p > 0.05, not analyzed	p > 0.05, not analyzed	451.747	534.002	668.717	523.658	613.566	689.685	0.1415	0.158295	0.893903	0.371374	0.999962
WBGene00001883	his-9	ZK131.3	p > 0.05, not analyzed	p > 0.05, not analyzed	0	217.015	0	175.979	206.089	277.837	1.60442	2.75215	0.58297	0.559914	0.999962
WBGene00001884	his-10	ZK131.4	p > 0.05, not analyzed	p > 0.05, not analyzed	737.949	941.262	611.695	487.965	642.295	739.532	-0.291518	0.172173	-1.69317	0.0904227	0.999962
WBGene00001885	his-11	ZK131.5	p > 0.05, not analyzed	p > 0.05, not analyzed	104.924	149.393	694.739	2.14608	967.443	1167.55	1.171	1.72188	0.680069	0.496461	0.999962
WBGene00001886	his-12	ZK131.6	p > 0.05, not analyzed	p > 0.05, not analyzed	1424.09	2190.12	7.33845	2622.58	291.954	3275.12	0.773288	1.66295	0.465009	0.641925	0.999962
WBGene00001887	his-13	ZK131.7	p > 0.05, not analyzed	p > 0.05, not analyzed	0	217.015	0	175.979	206.089	277.837	1.60442	2.75215	0.58297	0.559914	0.999962
WBGene00001888	his-14	ZK131.8	p > 0.05, not analyzed	p > 0.05, not analyzed	737.949	941.262	611.695	487.965	642.295	739.532	-0.291518	0.172173	-1.69317	0.0904227	0.999962
WBGene00001889	his-15	ZK131.9	p > 0.05, not analyzed	p > 0.05, not analyzed	104.924	149.393	694.739	2.14608	967.443	1167.55	1.171	1.72188	0.680069	0.496461	0.999962
WBGene00001892	his-18	K06C4.10	p > 0.05, not analyzed	p > 0.05, not analyzed	342.064	385.242	526.363	366.778	448.179	565.902	0.137916	0.183598	0.751189	0.452539	0.999962
WBGene00001893	his-19	K06C4.11	p > 0.05, not analyzed	p > 0.05, not analyzed	0	282.827	36.6923	0	0	209.75	-0.607082	3.72716	-0.162881	0.870612	0.999962
WBGene00001895	his-21	K06C4.3	p > 0.05, not analyzed	p > 0.05, not analyzed	513.349	282.827	680.642	465.712	640.444	630.138	0.233479	0.38434	0.607479	0.543533	0.999962
WBGene00001900	his-26	ZK131.1	p > 0.05, not analyzed	p > 0.05, not analyzed	2.39205	8.93603	1218.9	487.965	642.295	985.736	0.782269	1.93483	0.40431	0.685985	0.999962
WBGene00001901	his-27	K06C4.13	p > 0.05, not analyzed	p > 0.05, not analyzed	148.922	201.588	256.378	174.906	187.688	248.73	0.00714751	0.210853	0.0338981	0.972958	0.999962
WBGene00001902	his-28	K06C4.2	p > 0.05, not analyzed	p > 0.05, not analyzed	318.143	387.228	437.438	354.981	432.003	477.71	0.144489	0.160861	0.898222	0.369067	0.999962
WBGene00001903	his-29	F35H10.11	p > 0.05, not analyzed	p > 0.05, not analyzed	387.133	202.24	511.913	0	276.545	0	-1.99346	2.84493	-0.700705	0.483487	0.999962
WBGene00001904	his-30	F35H10.1	p > 0.05, not analyzed	p > 0.05, not analyzed	188.429	143.966	0	82.6264	131.611	0	-0.633551	2.77997	-0.227899	0.819725	0.999962
WBGene00001905	his-31	F17E9.12	p > 0.05, not analyzed	p > 0.05, not analyzed	77.7418	79.4314	84.4337	68.6369	93.2517	104.729	0.144727	0.245953	0.588432	0.556242	0.999962
WBGene00001906	his-32	F17E9.10	p > 0.05, not analyzed	p > 0.05, not analyzed	115.021	162.504	212.111	137.349	176.647	196.691	0.0567055	0.224803	0.252245	0.800852	0.999962
WBGene00001907	his-33	F17E9.13	p > 0.05, not analyzed	p > 0.05, not analyzed	0	76.5777	316.471	82.6264	131.611	298.627	0.383507	1.86163	0.206006	0.836786	0.999962
WBGene00001908	his-34	F17E9.9	p > 0.05, not analyzed	p > 0.05, not analyzed	0	202.24	0	390.586	276.545	664.616	2.71908	2.75354	0.987484	0.323405	0.999962
WBGene00001909	his-35	C50F4.13	p > 0.05, not analyzed	p > 0.05, not analyzed	253.071	279.169	268.778	210.28	263.209	218.734	-0.210104	0.161192	-1.30344	0.192425	0.999962
WBGene00001910	C50F4.6	C50F4.6	p > 0.05, not analyzed	p > 0.05, not analyzed	193.207	185.312	265.681	188.731	218.27	340.571	0.215117	0.218458	0.984704	0.32477	0.999962
WBGene00001911	his-37	C50F4.7	p > 0.05, not analyzed	p > 0.05, not analyzed	271.559	238.58	299.712	285.422	265.671	344.3	0.14493	0.163944	0.884023	0.376684	0.999962
WBGene00001912	his-38	K03A1.6	p > 0.05, not analyzed	p > 0.05, not analyzed	211.697	260.138	316.177	246.664	281.658	355.526	0.163091	0.185447	0.879446	0.379159	0.999962
WBGene00001914	his-40	K03A1.1	p > 0.05, not analyzed	p > 0.05, not analyzed	320.849	393.919	440.823	364.834	425.058	556.556	0.219825	0.172901	1.27139	0.203591	0.999962
WBGene00001915	his-41	C50F4.5	p > 0.05, not analyzed	p > 0.05, not analyzed	103.487	102.708	84.135	98.6958	95.6413	66.6899	-0.154443	0.242383	-0.637185	0.524005	0.999962
WBGene00001917	his-43	F08G2.2	p > 0.05, not analyzed	p > 0.05, not analyzed	1634.26	1207.89	3683.9	12.8768	2851.88	22.2192	-1.17662	1.86117	-0.632193	0.527261	0.999962
WBGene00001919	his-45	B0035.10	p > 0.05, not analyzed	p > 0.05, not analyzed	36.3225	2240.09	4783.57	933.546	1928.4	4224.01	0.00528658	1.45497	0.00363346	0.997101	0.999962
WBGene00001920	his-46	B0035.9	p > 0.05, not analyzed	p > 0.05, not analyzed	910.177	3220.94	7544.24	1595.81	5330.57	5298.9	0.066372	0.91605	0.0724546	0.94224	0.999962
WBGene00001921	his-47	B0035.7	p > 0.05, not analyzed	p > 0.05, not analyzed	9739.13	11363.1	8907.05	10030	8539.88	13708.4	0.105228	0.150048	0.701296	0.483118	0.999962
WBGene00001923	his-49	F07B7.5	p > 0.05, not analyzed	p > 0.05, not analyzed	148.922	201.588	256.378	174.906	187.688	248.73	0.00714751	0.210853	0.0338981	0.972958	0.999962
WBGene00001924	his-50	F07B7.9	p > 0.05, not analyzed	p > 0.05, not analyzed	318.143	387.228	437.438	354.981	432.003	477.71	0.144489	0.160861	0.898222	0.369067	0.999962
WBGene00001925	his-51	F07B7.10	p > 0.05, not analyzed	p > 0.05, not analyzed	513.349	282.827	680.642	465.712	640.444	630.138	0.233479	0.38434	0.607479	0.543533	0.999962
WBGene00001927	his-53	F07B7.3	p > 0.05, not analyzed	p > 0.05, not analyzed	0	282.827	36.6923	0	0	209.75	-0.607082	3.72716	-0.162881	0.870612	0.999962
WBGene00001929	his-55	F54E12.1	p > 0.05, not analyzed	p > 0.05, not analyzed	4593.58	3119.46	557.945	4164.47	3647.03	2831.29	0.363818	0.790607	0.460176	0.64539	0.999962
WBGene00001930	his-56	F54E12.3	p > 0.05, not analyzed	p > 0.05, not analyzed	8402.09	7867.68	5357.95	8825.2	7444.91	8553.76	0.199076	0.144765	1.37516	0.169081	0.999962
WBGene00001933	his-59	F55G1.2	p > 0.05, not analyzed	p > 0.05, not analyzed	2953.02	3512.35	3258.21	3032.42	3475.91	4362.48	0.161047	0.132393	1.21643	0.223821	0.999962
WBGene00001934	his-60	F55G1.11	p > 0.05, not analyzed	p > 0.05, not analyzed	2467.4	2772.15	3443.82	2683.27	3500.74	3655.4	0.180031	0.142104	1.2669	0.205192	0.999962
WBGene00001935	his-61	F55G1.10	p > 0.05, not analyzed	p > 0.05, not analyzed	2955.68	3649.18	3345.42	3154.82	3865.84	4768.25	0.244725	0.140132	1.74639	0.0807428	0.999962
WBGene00001937	his-63	F22B3.2	p > 0.05, not analyzed	p > 0.05, not analyzed	4177.08	4848.39	5136.78	4625.88	5504.59	6336.45	0.217481	0.126925	1.71346	0.0866271	0.999962
WBGene00001938	his-64	F22B3.1	p > 0.05, not analyzed	p > 0.05, not analyzed	3252	4062.91	4817.21	3667.78	4480.84	4926.84	0.107743	0.143792	0.749296	0.453679	0.999962
WBGene00001939	his-65	H02I12.7	p > 0.05, not analyzed	p > 0.05, not analyzed	730.767	785.177	1559.42	1114.92	1955.63	1034.53	0.41637	0.46734	0.890937	0.372963	0.999962
WBGene00001941	his-67	T23D8.5	p > 0.05, not analyzed	p > 0.05, not analyzed	1454.37	1696.85	2037.19	1531.46	2000.15	2270.04	0.160813	0.151318	1.06275	0.287894	0.999962
WBGene00001942	his-68	T23D8.6	p > 0.05, not analyzed	p > 0.05, not analyzed	724.728	891.365	801.726	838.067	905.52	1115.41	0.241922	0.136644	1.77046	0.0766514	0.999962
WBGene00001945	his-71	F45E1.6	p > 0.05, not analyzed	p > 0.05, not analyzed	76.8774	81.3708	82.749	74.0082	73.3481	84.2373	-0.0573082	0.240358	-0.238428	0.811549	0.999962
WBGene00001946	his-72	Y49E10.6	p > 0.05, not analyzed	p > 0.05, not analyzed	1397.66	1539.26	1422.98	1608.56	1523.94	1751.04	0.16367	0.107592	1.52121	0.128208	0.999962
WBGene00001948	hlh-1	B0304.1	p > 0.05, not analyzed	p > 0.05, not analyzed	9.66671	13.8153	19.1739	10.8232	9.77204	20.2758	-0.0640785	0.568858	-0.112644	0.910313	0.999962
WBGene00001949	hlh-2	M05B5.5	p > 0.05, not analyzed	p > 0.05, not analyzed	243.392	239.084	233.013	231.447	275.481	222.163	0.0285097	0.161494	0.176538	0.859872	0.999962
WBGene00001950	hlh-3	T24B8.6	p > 0.05, not analyzed	p > 0.05, not analyzed	22.0423	41.7606	41.7591	42.8855	36.1751	44.1716	0.211258	0.354511	0.595912	0.551234	0.999962
WBGene00001952	hlh-6	T15H9.3	p > 0.05, not analyzed	p > 0.05, not analyzed	3.67595	5.36641	5.7037	2.1441	3.52081	5.93381	-0.336465	0.954513	-0.352499	0.724464	0.999962
WBGene00001955	hlh-11	F58A4.7	p > 0.05, not analyzed	p > 0.05, not analyzed	115.131	123.674	102.667	87.4761	101.409	90.6988	-0.285136	0.21738	-1.31169	0.189623	0.999962
WBGene00001958	hlh-14	C18A3.8	p > 0.05, not analyzed	p > 0.05, not analyzed	8.55898	4.25855	11.343	3.21704	7.10082	7.68449	-0.413894	0.780639	-0.5302	0.595973	0.999962
WBGene00001963	btb-1	F40G9.4	p > 0.05, not analyzed	p > 0.05, not analyzed	12.2445	10.7039	22.7719	15.0101	22.0663	15.2951	0.18524	0.523839	0.35362	0.723624	0.999962
WBGene00001964	hlh-25	C17C3.7	p > 0.05, not analyzed	p > 0.05, not analyzed	7.36141	0	9.53924	5.35923	12.2599	4.21968	0.36792	0.916062	0.401632	0.687955	0.999962
WBGene00001966	hlh-27	C17C3.10	p > 0.05, not analyzed	p > 0.05, not analyzed	0	16.1699	3.81411	8.57497	5.25746	13.5102	0.444223	0.878033	0.50593	0.612906	0.999962
WBGene00001968	hlh-29	F31A3.4	p > 0.05, not analyzed	p > 0.05, not analyzed	4.90716	2.15651	6.6758	3.21558	4.38014	7.59784	0.150732	0.928786	0.162289	0.871078	0.999962
WBGene00001971	hmg-1.1	Y48B6A.14	p > 0.05, not analyzed	p > 0.05, not analyzed	2049.33	2110.36	1854.74	2100.72	2117.56	2243.63	0.104104	0.102478	1.01587	0.309691	0.999962
WBGene00001972	hmg-1.2	F47D12.4	p > 0.05, not analyzed	p > 0.05, not analyzed	827.755	835.167	739.484	779.938	804.1	788.311	-0.0170503	0.114684	-0.148672	0.881813	0.999962
WBGene00001973	hmg-3	C32F10.5	p > 0.05, not analyzed	p > 0.05, not analyzed	2648.63	2788.43	2375.45	2693.42	2664.79	2590.18	0.0251145	0.102174	0.2458	0.805837	0.999962
WBGene00001974	hmg-4	T20B12.8	p > 0.05, not analyzed	p > 0.05, not analyzed	2437.05	2468.01	2269.78	2430.94	2339.87	2481.43	0.0157403	0.0973925	0.161617	0.871607	0.999962
WBGene00001975	hmg-5	F45E4.9	p > 0.05, not analyzed	p > 0.05, not analyzed	642.886	747.347	932.883	791.239	977.692	1097.57	0.302523	0.154817	1.95407	0.0506927	0.999962
WBGene00001976	hmg-11	T05A7.4	p > 0.05, not analyzed	p > 0.05, not analyzed	134.118	126.43	165.148	116.92	125.624	147.389	-0.127041	0.204028	-0.622666	0.533504	0.999962
WBGene00001977	hmg-12	Y17G7A.1	p > 0.05, not analyzed	p > 0.05, not analyzed	3141.15	3520.82	2689.76	3231.57	2919.44	3285.27	0.0132101	0.117201	0.112713	0.910258	0.999962
WBGene00001978	hmp-1	R13H4.4	p > 0.05, not analyzed	p > 0.05, not analyzed	1651.37	2089.53	1711.24	1855.92	1717.37	1663.03	-0.058379	0.118131	-0.494187	0.621174	0.999962
WBGene00001979	hmp-2	K05C4.6	p > 0.05, not analyzed	p > 0.05, not analyzed	1067.19	1128.95	1006.08	1154.59	1047.05	1039.55	0.0170666	0.111366	0.153247	0.878203	0.999962
WBGene00001980	hmr-1	W02B9.1	p > 0.05, not analyzed	p > 0.05, not analyzed	3340.69	3581.61	2756.67	3459.49	3174.35	2857.95	-0.0281111	0.121457	-0.231448	0.816966	0.999962
WBGene00001981	hnd-1	C44C10.8	p > 0.05, not analyzed	p > 0.05, not analyzed	17.1692	10.7684	25.726	15.0068	20.1758	14.3682	-0.121724	0.511866	-0.237804	0.812033	0.999962
WBGene00001984	hog-1	W06B11.4	p > 0.05, not analyzed	p > 0.05, not analyzed	6.256	6.41814	10.1238	6.85088	3.11413	5.81163	-0.580183	0.801716	-0.723675	0.469265	0.999962
WBGene00001985	hop-1	C18E3.8	p > 0.05, not analyzed	p > 0.05, not analyzed	398.919	410.586	439.329	518.738	444.952	454.189	0.18038	0.134064	1.34548	0.178471	0.999962
WBGene00001986	hot-1	F43D2.4	p > 0.05, not analyzed	p > 0.05, not analyzed	8.36071	9.06303	8.36538	8.37897	7.44482	7.6336	-0.138544	0.690278	-0.200708	0.840927	0.999962
WBGene00001987	hot-2	Y39B6A.48	p > 0.05, not analyzed	p > 0.05, not analyzed	4.33942	4.7757	7.60622	5.68321	6.76647	9.50233	0.389117	0.791166	0.491827	0.622841	0.999962
WBGene00001989	hot-4	T12A2.16	p > 0.05, not analyzed	p > 0.05, not analyzed	6.48884	10.8209	4.79556	2.16709	12.4849	4.61017	-0.17289	0.825992	-0.209312	0.834205	0.999962
WBGene00001990	hot-5	K07A12.6	p > 0.05, not analyzed	p > 0.05, not analyzed	4.89092	1.0647	8.50762	3.21704	2.66264	5.12272	-0.400953	1.01624	-0.394546	0.693178	0.999962
WBGene00001991	hot-6	C13G3.2	p > 0.05, not analyzed	p > 0.05, not analyzed	19.5785	6.4065	21.7853	16.0836	11.5039	15.329	-0.159136	0.560981	-0.283675	0.776659	0.999962
WBGene00001993	hpd-1	T21C12.2	p > 0.05, not analyzed	p > 0.05, not analyzed	1342.68	1231.31	1355.34	1208.8	1178.94	1228.52	-0.119822	0.104935	-1.14187	0.253508	0.999962
WBGene00001994	hpk-1	F20B6.8	p > 0.05, not analyzed	p > 0.05, not analyzed	235.391	256.06	243.117	247.939	233.686	275.038	0.0428118	0.156807	0.273022	0.784836	0.999962
WBGene00001995	hpl-1	K08H2.6	p > 0.05, not analyzed	p > 0.05, not analyzed	50.2031	61.0149	44.5962	38.5974	57.37	54.3808	-0.0432214	0.305315	-0.141564	0.887425	0.999962
WBGene00001996	hpl-2	K01G5.2	p > 0.05, not analyzed	p > 0.05, not analyzed	907.103	1079.29	924.869	958.125	1043.4	981.66	0.0352115	0.117034	0.300866	0.763517	0.999962
WBGene00001997	hpr-9	Y39A1A.23	p > 0.05, not analyzed	p > 0.05, not analyzed	333.201	372.232	303.028	318.071	334.207	320.285	-0.0506949	0.145611	-0.348152	0.727726	0.999962
WBGene00001998	hpr-17	F32A11.2	p > 0.05, not analyzed	p > 0.05, not analyzed	677.289	745.377	581.983	721.135	749.234	698.453	0.114654	0.12798	0.895872	0.370321	0.999962
WBGene00001999	hrpa-1	F42A6.7	p > 0.05, not analyzed	p > 0.05, not analyzed	1958.37	2147.21	1583.88	2175.74	1881.95	1837.54	0.0512947	0.128251	0.399955	0.68919	0.999962
WBGene00002000	hrpr-1	F58D5.1	p > 0.05, not analyzed	p > 0.05, not analyzed	2169.51	2365.81	1744.14	2399.53	1960.62	2164.11	0.0552904	0.129143	0.428134	0.668554	0.999962
WBGene00002001	hars-1	T11G6.1	p > 0.05, not analyzed	p > 0.05, not analyzed	1631.71	1701.06	1552.47	1726.46	1548.01	1593.88	-0.00527132	0.104232	-0.0505728	0.959666	0.999962
WBGene00002002	hsb-1	K08E7.2	p > 0.05, not analyzed	p > 0.05, not analyzed	383.972	411.725	447.219	441.136	439.966	475.336	0.124617	0.133342	0.934564	0.350013	0.999962
WBGene00002003	hse-5	B0285.5	p > 0.05, not analyzed	p > 0.05, not analyzed	948.255	1056.64	932.657	1073.97	1123.65	1047.76	0.14393	0.111073	1.29581	0.195039	0.999962
WBGene00002004	hsf-1	Y53C10A.12	p > 0.05, not analyzed	p > 0.05, not analyzed	1253.74	1295.61	1048.58	1299.85	1201.71	1190.61	0.0377115	0.117775	0.320198	0.748818	0.999962
WBGene00002005	hsp-1	F26D10.3	p > 0.05, not analyzed	p > 0.05, not analyzed	31805.4	33212.5	26298.6	34062	27571.8	32822.8	0.0487905	0.11811	0.413094	0.679538	0.999962
WBGene00002006	hsp-2	K09C4.3	p > 0.05, not analyzed	p > 0.05, not analyzed	8.57441	10.7193	5.69869	9.64887	3.52537	7.63775	-0.26954	0.745726	-0.361446	0.717766	0.999962
WBGene00002007	hsp-3	C15H9.6	p > 0.05, not analyzed	p > 0.05, not analyzed	5801.12	5752.8	4769.58	5085.8	4754.78	5180.76	-0.11972	0.107225	-1.11653	0.264196	0.999962
WBGene00002008	hsp-4	F43E2.8	p > 0.05, not analyzed	p > 0.05, not analyzed	7495	7429.95	6053.82	7204.42	6779.55	7222.1	0.0157437	0.108092	0.145651	0.884197	0.999962
WBGene00002010	hsp-6	C37H5.8	p > 0.05, not analyzed	p > 0.05, not analyzed	3969.48	4178.5	3182.55	4041.06	3516.01	4005.23	0.029443	0.12012	0.245114	0.806368	0.999962
WBGene00002011	hsp-12.2	C14B9.1	p > 0.05, not analyzed	p > 0.05, not analyzed	121.761	96.4564	121.561	86.8956	97.4067	86.5804	-0.325779	0.221469	-1.471	0.141292	0.999962
WBGene00002012	hsp-12.3	F38E11.1	p > 0.05, not analyzed	p > 0.05, not analyzed	29.3314	38.2622	45.3183	40.7515	46.2368	46.1773	0.231248	0.329907	0.700949	0.483335	0.999962
WBGene00002013	hsp-12.6	F38E11.2	p > 0.05, not analyzed	p > 0.05, not analyzed	6.12004	5.34456	7.58327	15.0108	10.607	11.911	0.966805	0.668043	1.44722	0.147835	0.999962
WBGene00002015	hsp-16.1	T27E4.8	p > 0.05, not analyzed	p > 0.05, not analyzed	25.4728	0	0	0	0	0	-5.5984	3.91783	-1.42895	0.153017	0.999962
WBGene00002016	hsp-16.2	Y46H3A.3	p > 0.05, not analyzed	p > 0.05, not analyzed	50.591	67.9256	106.453	49.2757	53.3032	56.7241	-0.50256	0.302826	-1.65957	0.0970019	0.999962
WBGene00002018	hsp-16.41	Y46H3A.2	p > 0.05, not analyzed	p > 0.05, not analyzed	80.6239	71.0868	109.386	45.0428	64.1364	83.078	-0.437697	0.283126	-1.54595	0.122118	0.999962
WBGene00002019	hsp-16.48	T27E4.3	p > 0.05, not analyzed	p > 0.05, not analyzed	0	126.086	185.093	197.437	97.0435	272.98	0.866222	1.72278	0.502806	0.615101	0.999962
WBGene00002020	hsp-16.49	T27E4.9	p > 0.05, not analyzed	p > 0.05, not analyzed	282.519	126.086	185.093	0	97.0435	0	-2.61257	2.58349	-1.01126	0.311894	0.999962
WBGene00002021	hsp-17	F52E1.7	p > 0.05, not analyzed	p > 0.05, not analyzed	137.022	104.049	131.173	123.505	131.756	141.421	0.0947935	0.204031	0.464604	0.642215	0.999962
WBGene00002023	hsp-25	C09B8.6	p > 0.05, not analyzed	p > 0.05, not analyzed	472.852	354.738	419.717	382.995	370.818	367.001	-0.152895	0.145417	-1.05142	0.293064	0.999962
WBGene00002024	hsp-43	C14F11.5	p > 0.05, not analyzed	p > 0.05, not analyzed	290.913	285.415	323.519	303.143	303.591	363.107	0.108183	0.151118	0.715884	0.474063	0.999962
WBGene00002025	hsp-60	Y22D7AL.5	p > 0.05, not analyzed	p > 0.05, not analyzed	3686.57	4073.69	3265.87	3806.79	3129.91	3515.91	-0.077136	0.116344	-0.662999	0.507331	0.999962
WBGene00002027	hsr-9	T05F1.6	p > 0.05, not analyzed	p > 0.05, not analyzed	5515.37	5646.37	4459.01	5708.33	5288.25	5330.42	0.0639659	0.11157	0.573323	0.566426	0.999962
WBGene00002028	hst-1	F08B4.6	p > 0.05, not analyzed	p > 0.05, not analyzed	1060.88	1104.99	943.767	1107.71	1004.1	1008.51	0.00497702	0.114864	0.0433297	0.965439	0.999962
WBGene00002029	hst-2	C34F6.4	p > 0.05, not analyzed	p > 0.05, not analyzed	111.792	124.668	112.957	109.306	119.356	119.306	-0.00449845	0.204225	-0.0220269	0.982427	0.999962
WBGene00002030	hst-3.1	F40H3.5	p > 0.05, not analyzed	p > 0.05, not analyzed	11.0402	7.54546	9.53483	4.28749	3.50521	7.59991	-0.856455	0.7585	-1.12914	0.258837	0.999962
WBGene00002032	htp-1	F41H10.10	p > 0.05, not analyzed	p > 0.05, not analyzed	869.293	935.725	927.171	1002.06	1040.75	1152.38	0.226059	0.112989	2.00071	0.0454232	0.999962
[truncated: 28,124 more rows]
