# Supplementary material for: A low-abundance class of Dicer-dependent siRNAs produced from a variety of features in C. elegans
Source: HighWire-hosted journal article supplement (doi:10.1101/gr.279083.124), 2024-12-01
Supplement: Supplemental_Table_S12.xlsx [file Supplemental_Table_S12.xlsx]

## Sheet: Sheet1
Supplemental Table S12. High-throughput sequencing libraries used in this study.
Description	Stage	Genotype	Polyphosphatase	RNAi treatment	Type	Citation	Figures and Tables	GEO Accession
wild type, rep 1	gravid adult hermaphrodites, 20˚C	wild type (N2)	RNA 5' pyrophosphohydrolase	none	sRNA-seq	This study	Fig. 4C,6B,S3A-S3C,S7B	GSE254442
wild type, rep 2	gravid adult hermaphrodites, 20˚C	wild type (N2)	RNA 5' pyrophosphohydrolase	none	sRNA-seq	This study	Fig. 4C,6B,S3A-S3C,S7B	GSE254442
wild type, rep 3	gravid adult hermaphrodites, 20˚C	wild type (N2)	RNA 5' pyrophosphohydrolase	none	sRNA-seq	This study	Fig. 4C,6B,S3A-S3C,S7B	GSE254442
rde-1, rep1	gravid adult hermaphrodites, 20˚C	rde-1(ne219)	RNA 5' pyrophosphohydrolase	none	sRNA-seq	This study	Fig. 4C,6B,S7B	GSE254442
rde-1, rep2	gravid adult hermaphrodites, 20˚C	rde-1(ne219)	RNA 5' pyrophosphohydrolase	none	sRNA-seq	This study	Fig. 4C,6B,S7B	GSE254442
rde-1, rep3	gravid adult hermaphrodites, 20˚C	rde-1(ne219)	RNA 5' pyrophosphohydrolase	none	sRNA-seq	This study	Fig. 4C,6B,S7B	GSE254442
GFP::rde-1, input, rep 1	gravid adult hermaphrodites, 20˚C	rde-1(cmp133[(gfp::3xFLAG)::rde-1])	RNA 5' pyrophosphohydrolase	nrlf-1 and oma-1	sRNA-seq	This study	Fig. 1H,2C,3A,3B,3D,4A,4B,S1B,S2B,S4B-S4D; Table S7,S8	GSE254442
GFP::rde-1, input, rep 2	gravid adult hermaphrodites, 20˚C	rde-1(cmp133[(gfp::3xFLAG)::rde-1])	RNA 5' pyrophosphohydrolase	nrlf-1 and oma-1	sRNA-seq	This study	Fig. 1H,2C,3A,3B,3D,4A,4B,S1B,S2B,S4B-S4D; Table S7,S8	GSE254442
GFP::RDE-1, co-IP, rep1	gravid adult hermaphrodites, 20˚C	rde-1(cmp133[(gfp::3xFLAG)::rde-1])	RNA 5' pyrophosphohydrolase	nrlf-1 and oma-1	sRNA-seq	This study	Fig. 1H,2C,3A,3B,3D,4A,4B,S1B,S2B,S4B-S4D; Table S1,S7,S8	GSE254442
GFP::RDE-1, co-IP, rep1	gravid adult hermaphrodites, 20˚C	rde-1(cmp133[(gfp::3xFLAG)::rde-1])	RNA 5' pyrophosphohydrolase	nrlf-1 and oma-1	sRNA-seq	This study	Fig. 1H,2C,3A,3B,3D,4A,4B,S1B,S2B,S4B-S4D; Table S1,S7,S8	GSE254442
L4440 RNAi, rep 1	gravid adult hermaphrodites, 20˚C	rde-1(cmp133[(gfp::3xFLAG)::rde-1])	none	L4440	sRNA-seq	This study	Fig. S2C-S2E; Table S4	GSE254442
L4440 RNAi, rep 2	gravid adult hermaphrodites, 20˚C	rde-1(cmp133[(gfp::3xFLAG)::rde-1])	none	L4440	sRNA-seq	This study	Fig. S2C-S2E; Table S4	GSE254442
dcr-1 RNAi, rep 1	gravid adult hermaphrodites, 20˚C	rde-1(cmp133[(gfp::3xFLAG)::rde-1])	none	dcr-1	sRNA-seq	This study	Fig. S2C-S2E; Table S4	GSE254442
dcr-1 RNAi, rep 2	gravid adult hermaphrodites, 20˚C	rde-1(cmp133[(gfp::3xFLAG)::rde-1])	none	dcr-1	sRNA-seq	This study	Fig. S2C-S2E; Table S4	GSE254442
GFP::alg-1, L4440 RNAi, input, rep 1	gravid adult hermaphrodites, 20˚C	alg-1(ap423[3xflag::gfp::alg-1])	none	L4440	sRNA-seq	This study	Fig. 5A,S6C; Table S10	GSE254442
GFP::alg-1, L4440 RNAi, input, rep 2	gravid adult hermaphrodites, 20˚C	alg-1(ap423[3xflag::gfp::alg-1])	none	L4440	sRNA-seq	This study	Fig. 5A,S6C; Table S10	GSE254442
GFP::alg-1, rde-1 RNAi, input, rep 1	gravid adult hermaphrodites, 20˚C	alg-1(ap423[3xflag::gfp::alg-1])	none	rde-1	sRNA-seq	This study	Fig. 5A,S6C; Table S10	GSE254442
GFP::alg-1, rde-1 RNAi, input, rep 2	gravid adult hermaphrodites, 20˚C	alg-1(ap423[3xflag::gfp::alg-1])	none	rde-1	sRNA-seq	This study	Fig. 5A,S6C; Table S10	GSE254442
GFP::alg-2, L4440 RNAi, input, rep 1	gravid adult hermaphrodites, 20˚C	alg-2(tor139[GFP::3xFLAG::alg-2b])	none	L4440	sRNA-seq	This study	Fig. 5B,S6D; Table S10	GSE254442
GFP::alg-2, L4440 RNAi, input, rep 2	gravid adult hermaphrodites, 20˚C	alg-2(tor139[GFP::3xFLAG::alg-2b])	none	L4440	sRNA-seq	This study	Fig. 5B,S6D; Table S10	GSE254442
GFP::alg-2, rde-1 RNAi, input, rep 1	gravid adult hermaphrodites, 20˚C	alg-2(tor139[GFP::3xFLAG::alg-2b])	none	rde-1	sRNA-seq	This study	Fig. 5B,S6D; Table S10	GSE254442
GFP::alg-2, rde-1 RNAi, input, rep 2	gravid adult hermaphrodites, 20˚C	alg-2(tor139[GFP::3xFLAG::alg-2b])	none	rde-1	sRNA-seq	This study	Fig. 5B,S6D; Table S10	GSE254442
GFP::alg-1, L4440 RNAi, co-IP, rep 1	gravid adult hermaphrodites, 20˚C	alg-1(ap423[3xflag::gfp::alg-1])	none	L4440	sRNA-seq	This study	Fig. 5A,S6C; Table S10	GSE254442
GFP::alg-1, L4440 RNAi, co-IP, rep 2	gravid adult hermaphrodites, 20˚C	alg-1(ap423[3xflag::gfp::alg-1])	none	L4440	sRNA-seq	This study	Fig. 5A,S6C; Table S10	GSE254442
GFP::alg-1, rde-1 RNAi, co-IP, rep 1	gravid adult hermaphrodites, 20˚C	alg-1(ap423[3xflag::gfp::alg-1])	none	rde-1	sRNA-seq	This study	Fig. 5A,S6C; Table S10	GSE254442
GFP::alg-1, rde-1 RNAi, co-IP, rep 2	gravid adult hermaphrodites, 20˚C	alg-1(ap423[3xflag::gfp::alg-1])	none	rde-1	sRNA-seq	This study	Fig. 5A,S6C; Table S10	GSE254442
GFP::alg-2, L4440 RNAi, co-IP, rep 1	gravid adult hermaphrodites, 20˚C	alg-2(tor139[GFP::3xFLAG::alg-2b])	none	L4440	sRNA-seq	This study	Fig. 5B,S6D; Table S10	GSE254442
GFP::alg-2, L4440 RNAi, co-IP, rep 2	gravid adult hermaphrodites, 20˚C	alg-2(tor139[GFP::3xFLAG::alg-2b])	none	L4440	sRNA-seq	This study	Fig. 5B,S6D; Table S10	GSE254442
GFP::alg-2, rde-1 RNAi, co-IP, rep 1	gravid adult hermaphrodites, 20˚C	alg-2(tor139[GFP::3xFLAG::alg-2b])	none	rde-1	sRNA-seq	This study	Fig. 5B,S6D; Table S10	GSE254442
GFP::alg-2, rde-1 RNAi, co-IP, rep 2	gravid adult hermaphrodites, 20˚C	alg-2(tor139[GFP::3xFLAG::alg-2b])	none	rde-1	sRNA-seq	This study	Fig. 5B,S6D; Table S10	GSE254442
GFP::alg-1, nrfl-1 RNAi, input, rep 1	gravid adult hermaphrodites, 20˚C	alg-1(ap423[3xflag::gfp::alg-1])	none	nrfl-1	sRNA-seq	This study	Fig. 1I,1K	GSE254442
GFP::alg-1, nrfl-1 RNAi, input, rep 2	gravid adult hermaphrodites, 20˚C	alg-1(ap423[3xflag::gfp::alg-1])	none	nrfl-1	sRNA-seq	This study	Fig. 1I,1K	GSE254442
GFP::alg-1, nrfl-1 RNAi, input, rep 3	gravid adult hermaphrodites, 20˚C	alg-1(ap423[3xflag::gfp::alg-1])	none	nrfl-1	sRNA-seq	This study	Fig. 1I,1K	GSE254442
GFP::alg-1, nrfl-1 RNAi, co-IP, rep 1	gravid adult hermaphrodites, 20˚C	alg-1(ap423[3xflag::gfp::alg-1])	none	nrfl-1	sRNA-seq	This study	Fig. 1I,1K	GSE254442
GFP::alg-1, nrfl-1 RNAi, co-IP, rep 2	gravid adult hermaphrodites, 20˚C	alg-1(ap423[3xflag::gfp::alg-1])	none	nrfl-1	sRNA-seq	This study	Fig. 1I,1K	GSE254442
GFP::alg-1, nrfl-1 RNAi, co-IP, rep 3	gravid adult hermaphrodites, 20˚C	alg-1(ap423[3xflag::gfp::alg-1])	none	nrfl-1	sRNA-seq	This study	Fig. 1I,1K	GSE254442
GFP::rde-1, nrfl-1 RNAi, input, rep 1	gravid adult hermaphrodites, 20˚C	rde-1(cmp133[(gfp::3xFLAG)::rde-1])	none	nrfl-1	sRNA-seq	This study	Fig. 1J,S1C	GSE254442
GFP::rde-1, nrfl-1 RNAi, input, rep 2	gravid adult hermaphrodites, 20˚C	rde-1(cmp133[(gfp::3xFLAG)::rde-1])	none	nrfl-1	sRNA-seq	This study	Fig. 1J,S1C	GSE254442
GFP::rde-1, nrfl-1 RNAi, input, rep 3	gravid adult hermaphrodites, 20˚C	rde-1(cmp133[(gfp::3xFLAG)::rde-1])	none	nrfl-1	sRNA-seq	This study	Fig. 1J,S1C	GSE254442
GFP::rde-1, nrfl-1 RNAi, co-IP, rep 1	gravid adult hermaphrodites, 20˚C	rde-1(cmp133[(gfp::3xFLAG)::rde-1])	none	nrfl-1	sRNA-seq	This study	Fig. 1J,S1C	GSE254442
GFP::rde-1, nrfl-1 RNAi, co-IP, rep 2	gravid adult hermaphrodites, 20˚C	rde-1(cmp133[(gfp::3xFLAG)::rde-1])	none	nrfl-1	sRNA-seq	This study	Fig. 1J,S1C	GSE254442
GFP::rde-1, nrfl-1 RNAi, co-IP, rep 3	gravid adult hermaphrodites, 20˚C	rde-1(cmp133[(gfp::3xFLAG)::rde-1])	none	nrfl-1	sRNA-seq	This study	Fig. 1J,S1C	GSE254442
wild type, rep 1	gravid adult hermaphrodites, 20˚C	wild type (N2)	none	none	mRNA-seq	This study	Fig. 7B, Table S11	GSE254442
wild type, rep 2	gravid adult hermaphrodites, 20˚C	wild type (N2)	none	none	mRNA-seq	This study	Fig. 7B, Table S11	GSE254442
wild type, rep 3	gravid adult hermaphrodites, 20˚C	wild type (N2)	none	none	mRNA-seq	This study	Fig. 7B, Table S11	GSE254442
rde-1, rep 1	gravid adult hermaphrodites, 20˚C	rde-1(ram40)	none	none	mRNA-seq	This study	Fig. 7B, Table S11	GSE254442
rde-1, rep 2	gravid adult hermaphrodites, 20˚C	rde-1(ram40)	none	none	mRNA-seq	This study	Fig. 7B, Table S11	GSE254442
rde-1, rep 3	gravid adult hermaphrodites, 20˚C	rde-1(ram40)	none	none	mRNA-seq	This study	Fig. 7B, Table S11	GSE254442
wild type, rep 1	gravid adult hermaphrodites, 20˚C	wild type (N2)	RNA 5' polyphosphatase	none	sRNA-seq	This study	Fig. S3A; Table S5	GSE254442
wild type, rep 2	gravid adult hermaphrodites, 20˚C	wild type (N2)	RNA 5' polyphosphatase	none	sRNA-seq	This study	Fig. S3A; Table S5	GSE254442
wild type, rep 3	gravid adult hermaphrodites, 20˚C	wild type (N2)	RNA 5' polyphosphatase	none	sRNA-seq	This study	Fig. S3A; Table S5	GSE254442
wild type, rep 1	mixed stage embryos, 20˚C	wild type (N2)	RNA 5' polyphosphatase	none	sRNA-seq	This study	Fig. S3A; Table S5	GSE254442
wild type, rep 2	mixed stage embryos, 20˚C	wild type (N2)	RNA 5' polyphosphatase	none	sRNA-seq	This study	Fig. S3A; Table S5	GSE254442
wild type	gravid adult hermaphrodites, 25˚C	wild type (N2)	none	pos-1	sRNA-seq	Svendsen et al. (2019)	Fig. 2D	GSE137734
wild type	gravid adult hermaphrodites, 25˚C	wild type (N2)	RNA 5' polyphosphatase	pos-1	sRNA-seq	Svendsen et al. (2019)	Fig. 2D	GSE137734
wild type	gravid adult hermaphrodites, 25˚C	wild type (N2)	Sodium periodate	pos-1	sRNA-seq	Svendsen et al. (2019)	Fig. 2D	GSE137734
glp-4(bn2)	sterile hermaphroditic adult whole animals, 25˚C	glp-4(bn2)	None	pos-1	sRNA-seq	Svendsen et al. (2019)	Fig. 1A,1B,1C	GSE137734
glp-4(bn2)	sterile hermaphroditic adult whole animals, 25˚C	glp-4(bn2)	RNA 5' polyphosphatase	pos-1	sRNA-seq	Svendsen et al. (2019)	Fig. 1C	GSE137734
glp-4(bn2)	sterile hermaphroditic adult whole animals, 25˚C	glp-4(bn2)	Sodium periodate	pos-1	sRNA-seq	Svendsen et al. (2019)	Fig. 1C,1D,1E,1F,S1A,S4A	GSE137734
wild type, rep 1	L4 hermaphrodites, 20˚C	wild type (N2)	RNA 5' polyphosphatase	none	sRNA-seq	Svendsen et al. (2019)	Fig. S3B; Table S5	GSE137734
wild type, rep 2	L4 hermaphrodites, 20˚C	wild type (N2)	RNA 5' polyphosphatase	none	sRNA-seq	Svendsen et al. (2019)	Fig. S3B; Table S5	GSE137734
wild type, rep 3	L4 hermaphrodites, 20˚C	wild type (N2)	RNA 5' polyphosphatase	none	sRNA-seq	Svendsen et al. (2019)	Fig. S3B; Table S5	GSE137734
wild type	gravid adult hermaphrodites, 20˚C	wild type (N2)	none	none	mRNA-seq	Reed et al. (2020)	Fig. 3B,3D	GSE141243
wild type, rep 1	gravid hermaphroditic adult dissected gonads, 20˚C	wild type (N2)	RNA 5' polyphosphatase	none	sRNA-seq	Reed et al. (2020)	Fig. S3C; Table S5	GSE141243
wild type, rep 2	gravid hermaphroditic adult dissected gonads, 20˚C	wild type (N2)	RNA 5' polyphosphatase	none	sRNA-seq	Reed et al. (2020)	Fig. S3C; Table S5	GSE141243
wild type, rep 3	gravid hermaphroditic adult dissected gonads, 20˚C	wild type (N2)	RNA 5' polyphosphatase	none	sRNA-seq	Reed et al. (2020)	Fig. S3C; Table S5	GSE141243
wild type, rep 1	gravid adult hermaphrodites, 20˚C	wild type (N2)	RNA 5' polyphosphatase	none	sRNA-seq	Montgomery et al. (2021)	Fig. 6A,6C,6E,S7A,S7C; Table S5	GSE179811
wild type, rep 2	gravid adult hermaphrodites, 20˚C	wild type (N2)	RNA 5' polyphosphatase	none	sRNA-seq	Montgomery et al. (2021)	Fig. 6A,6C,6E,S7A,S7C; Table S5	GSE179811
wild type, rep 3	gravid adult hermaphrodites, 20˚C	wild type (N2)	RNA 5' polyphosphatase	none	sRNA-seq	Montgomery et al. (2021)	Fig. 6A,6C,6E,S7A,S7C; Table S5	GSE179811
prg-1, rep 1	gravid adult hermaphrodites, 20˚C	prg-1(n4357)	RNA 5' polyphosphatase	none	sRNA-seq	Montgomery et al. (2021)	Fig. 6C,6E,S7C; Table S5	GSE179811
prg-1, rep 2	gravid adult hermaphrodites, 20˚C	prg-1(n4357)	RNA 5' polyphosphatase	none	sRNA-seq	Montgomery et al. (2021)	Fig. 6C,6E,S7C; Table S5	GSE179811
prg-1, rep 3	gravid adult hermaphrodites, 20˚C	prg-1(n4357)	RNA 5' polyphosphatase	none	sRNA-seq	Montgomery et al. (2021)	Fig. 6C,6E,S7C; Table S5	GSE179811
mut-14 smut-1, rep 1	gravid adult hermaphrodites, 20˚C	unc-119(ed3); mut-14(mg464) smut-1(tm1301)	RNA 5' polyphosphatase	none	sRNA-seq	Montgomery et al. (2021)	Fig. 6A,6E,S7A; Table S5	GSE179811
mut-14 smut-1, rep 2	gravid adult hermaphrodites, 20˚C	unc-119(ed3); mut-14(mg464) smut-1(tm1301)	RNA 5' polyphosphatase	none	sRNA-seq	Montgomery et al. (2021)	Fig. 6A,6E,S7A; Table S5	GSE179811
GFP::rde-1, input, rep 1	young adult hermaphrodites, 20˚C	tor153[GFP::3xFLAG::rde-1]	RNA 5' polyphosphatase	none	sRNA-seq	Seroussi et al. (2023)	Fig. S5A,S5G; Table S9	GSE208702
GFP::rde-1, input, rep 2	young adult hermaphrodites, 20˚C	tor153[GFP::3xFLAG::rde-1]	RNA 5' polyphosphatase	none	sRNA-seq	Seroussi et al. (2023)	Fig. S5A,S5G; Table S9	GSE208702
GFP::alg-1, input, rep 1	young adult hermaphrodites, 20˚C	tor137[GFP::3xFLAG::alg-1b]	RNA 5' polyphosphatase	none	sRNA-seq	Seroussi et al. (2023)	Fig. S5B,S5G; Table S9	GSE208702
GFP::alg-1, input, rep 2	young adult hermaphrodites, 20˚C	tor137[GFP::3xFLAG::alg-1b]	RNA 5' polyphosphatase	none	sRNA-seq	Seroussi et al. (2023)	Fig. S5B,S5G; Table S9	GSE208702
GFP::alg-2, input, rep 1	young adult hermaphrodites, 20˚C	tor139[GFP::3xFLAG::alg-2b]	RNA 5' polyphosphatase	none	sRNA-seq	Seroussi et al. (2023)	Fig. S5C,S5G; Table S9	GSE208702
GFP::alg-2, input, rep 2	young adult hermaphrodites, 20˚C	tor139[GFP::3xFLAG::alg-2b]	RNA 5' polyphosphatase	none	sRNA-seq	Seroussi et al. (2023)	Fig. S5C,S5G; Table S9	GSE208702
GFP::alg-4, input, rep 1	L4 hermaphrodites, 20˚C	tor143[GFP::3xFLAG::alg-4]	RNA 5' polyphosphatase	none	sRNA-seq	Seroussi et al. (2023)	Fig. S5E,S5G; Table S9	GSE208702
GFP::alg-4, input, rep 2	L4 hermaphrodites, 20˚C	tor143[GFP::3xFLAG::alg-4]	RNA 5' polyphosphatase	none	sRNA-seq	Seroussi et al. (2023)	Fig. S5E,S5G; Table S9	GSE208702
GFP::alg-5, input, rep 1	young adult hermaphrodites, 20˚C	tor145[GFP::3xFLAG::alg-5]	RNA 5' polyphosphatase	none	sRNA-seq	Seroussi et al. (2023)	Fig. S5D,S5G; Table S9	GSE208702
GFP::alg-5, input, rep 2	young adult hermaphrodites, 20˚C	tor145[GFP::3xFLAG::alg-5]	RNA 5' polyphosphatase	none	sRNA-seq	Seroussi et al. (2023)	Fig. S5D,S5G; Table S9	GSE208702
GFP::ergo-1, input, rep 1	young adult hermaphrodites, 20˚C	tor147[GFP::3xFLAG::ergo-1a]	RNA 5' polyphosphatase	none	sRNA-seq	Seroussi et al. (2023)	Fig. S5F,S5G; Table S9	GSE208702
GFP::ergo-1, input, rep 2	young adult hermaphrodites, 20˚C	tor147[GFP::3xFLAG::ergo-1a]	RNA 5' polyphosphatase	none	sRNA-seq	Seroussi et al. (2023)	Fig. S5F,S5G; Table S9	GSE208702
GFP::rde-1, co-IP, rep 1	young adult hermaphrodites, 20˚C	tor153[GFP::3xFLAG::rde-1]	RNA 5' polyphosphatase	none	sRNA-seq	Seroussi et al. (2023)	Fig. S5A,S5G; Table S9	GSE208702
GFP::rde-1, co-IP, rep 2	young adult hermaphrodites, 20˚C	tor153[GFP::3xFLAG::rde-1]	RNA 5' polyphosphatase	none	sRNA-seq	Seroussi et al. (2023)	Fig. S5A,S5G; Table S9	GSE208702
GFP::alg-1, co-IP, rep 1	young adult hermaphrodites, 20˚C	tor137[GFP::3xFLAG::alg-1b]	RNA 5' polyphosphatase	none	sRNA-seq	Seroussi et al. (2023)	Fig. S5B,S5G; Table S9	GSE208702
GFP::alg-1, co-IP, rep 2	young adult hermaphrodites, 20˚C	tor137[GFP::3xFLAG::alg-1b]	RNA 5' polyphosphatase	none	sRNA-seq	Seroussi et al. (2023)	Fig. S5B,S5G; Table S9	GSE208702
GFP::alg-2, co-IP, rep 1	young adult hermaphrodites, 20˚C	tor139[GFP::3xFLAG::alg-2b]	RNA 5' polyphosphatase	none	sRNA-seq	Seroussi et al. (2023)	Fig. S5C,S5G; Table S9	GSE208702
GFP::alg-2, co-IP, rep 2	young adult hermaphrodites, 20˚C	tor139[GFP::3xFLAG::alg-2b]	RNA 5' polyphosphatase	none	sRNA-seq	Seroussi et al. (2023)	Fig. S5C,S5G; Table S9	GSE208702
GFP::alg-4, co-IP, rep 1	L4 hermaphrodites, 20˚C	tor143[GFP::3xFLAG::alg-4]	RNA 5' polyphosphatase	none	sRNA-seq	Seroussi et al. (2023)	Fig. S5E,S5G; Table S9	GSE208702
GFP::alg-4, co-IP, rep 2	L4 hermaphrodites, 20˚C	tor143[GFP::3xFLAG::alg-4]	RNA 5' polyphosphatase	none	sRNA-seq	Seroussi et al. (2023)	Fig. S5E,S5G; Table S9	GSE208702
GFP::alg-5, co-IP, rep 1	young adult hermaphrodites, 20˚C	tor145[GFP::3xFLAG::alg-5]	RNA 5' polyphosphatase	none	sRNA-seq	Seroussi et al. (2023)	Fig. S5D,S5G; Table S9	GSE208702
GFP::alg-5, co-IP, rep 2	young adult hermaphrodites, 20˚C	tor145[GFP::3xFLAG::alg-5]	RNA 5' polyphosphatase	none	sRNA-seq	Seroussi et al. (2023)	Fig. S5D,S5G; Table S9	GSE208702
GFP::ergo-1, co-IP, rep 1	young adult hermaphrodites, 20˚C	tor147[GFP::3xFLAG::ergo-1a]	RNA 5' polyphosphatase	none	sRNA-seq	Seroussi et al. (2023)	Fig. S5F,S5G; Table S9	GSE208702
GFP::ergo-1, co-IP, rep 2	young adult hermaphrodites, 20˚C	tor147[GFP::3xFLAG::ergo-1a]	RNA 5' polyphosphatase	none	sRNA-seq	Seroussi et al. (2023)	Fig. S5F,S5G; Table S9	GSE208702
wild type, rep 1	young adult hermaphrodites, 20˚C	wild type (N2)	RNA 5' polyphosphatase	none	sRNA-seq	Seroussi et al. (2023)	Fig. 6D,6E,S7D; Table S5	GSE208702
wild type, rep 2	young adult hermaphrodites, 20˚C	wild type (N2)	RNA 5' polyphosphatase	none	sRNA-seq	Seroussi et al. (2023)	Fig. 6D,6E,S7D; Table S5	GSE208702
wild type, rep 3	young adult hermaphrodites, 20˚C	wild type (N2)	RNA 5' polyphosphatase	none	sRNA-seq	Seroussi et al. (2023)	Fig. 6D,6E,S7D; Table S5	GSE208702
ergo-1, rep 1	young adult hermaphrodites, 20˚C	ergo-1 (tm1860)	RNA 5' polyphosphatase	none	sRNA-seq	Seroussi et al. (2023)	Fig. 6D,6E,S7D; Table S5	GSE208702
ergo-1, rep 2	young adult hermaphrodites, 20˚C	ergo-1 (tm1860)	RNA 5' polyphosphatase	none	sRNA-seq	Seroussi et al. (2023)	Fig. 6D,6E,S7D; Table S5	GSE208702
ergo-1, rep 3	young adult hermaphrodites, 20˚C	ergo-1 (tm1860)	RNA 5' polyphosphatase	none	sRNA-seq	Seroussi et al. (2023)	Fig. 6D,6E,S7D; Table S5	GSE208702
dcr-1(-/-), wild type rescue	mixed stage hermaphrodites, 20˚C	dcr-1(ok247);uuEx18[dcr-1(+), dpy-30::mCherry]	none	none	sRNA-seq	Welker et al. (2010)	Fig. S2F	GSE20336
dcr-1(-/-), K39A rescue, rep 1	mixed stage hermaphrodites, 20˚C	dcr-1(ok247);uuEx18[dcr-1(K39A), dpy-30::mCherry]	none	none	sRNA-seq	Welker et al. (2010)	Fig. S2F	GSE20336
dcr-1(-/-), K39A rescue, rep 2	mixed stage hermaphrodites, 20˚C	dcr-1(ok247);uuEx18[dcr-1(K39A), dpy-30::mCherry]	none	none	sRNA-seq	Welker et al. (2010)	Fig. S2F	GSE20336
wild type, rep 1	gravid adult hermaphrodites, 20˚C	wild type (N2)	none	none	sRNA-seq	Montgomery et al. (2024)	Fig. S2A; Table S2	GSE263914
wild type, rep 2	gravid adult hermaphrodites, 20˚C	wild type (N2)	none	none	sRNA-seq	Montgomery et al. (2024)	Fig. S2A; Table S2	GSE263914
wild type, rep 3	gravid adult hermaphrodites, 20˚C	wild type (N2)	none	none	sRNA-seq	Montgomery et al. (2024)	Fig. S2A; Table S2	GSE263914
pash-1, rep 1	gravid adult hermaphrodites, 20˚C	pash-1(ram33)	none	none	sRNA-seq	Montgomery et al. (2024)	Fig. S2A; Table S2	GSE263914
pash-1, rep 2	gravid adult hermaphrodites, 20˚C	pash-1(ram33)	none	none	sRNA-seq	Montgomery et al. (2024)	Fig. S2A; Table S2	GSE263914
pash-1, rep 3	gravid adult hermaphrodites, 20˚C	pash-1(ram33)	none	none	sRNA-seq	Montgomery et al. (2024)	Fig. S2A; Table S2	GSE263914
